# Supplementary material for: Organocatalytic synthesis of chiral tetrasubstituted allenes from racemic propargylic alcohols
Source: PubMed Central journal article supplement (PMC5603569; doi:10.1038/s41467-017-00251-x), 2017-09-18
Supplement: 41467_2017_251_MOESM1_ESM.pdf [file 41467_2017_251_MOESM1_ESM.pdf]

File Name: Supplementary Information

Description: Supplementary Figures, Supplementary Tables, Supplementary Notes, Supplementary Methods and Supplementary References

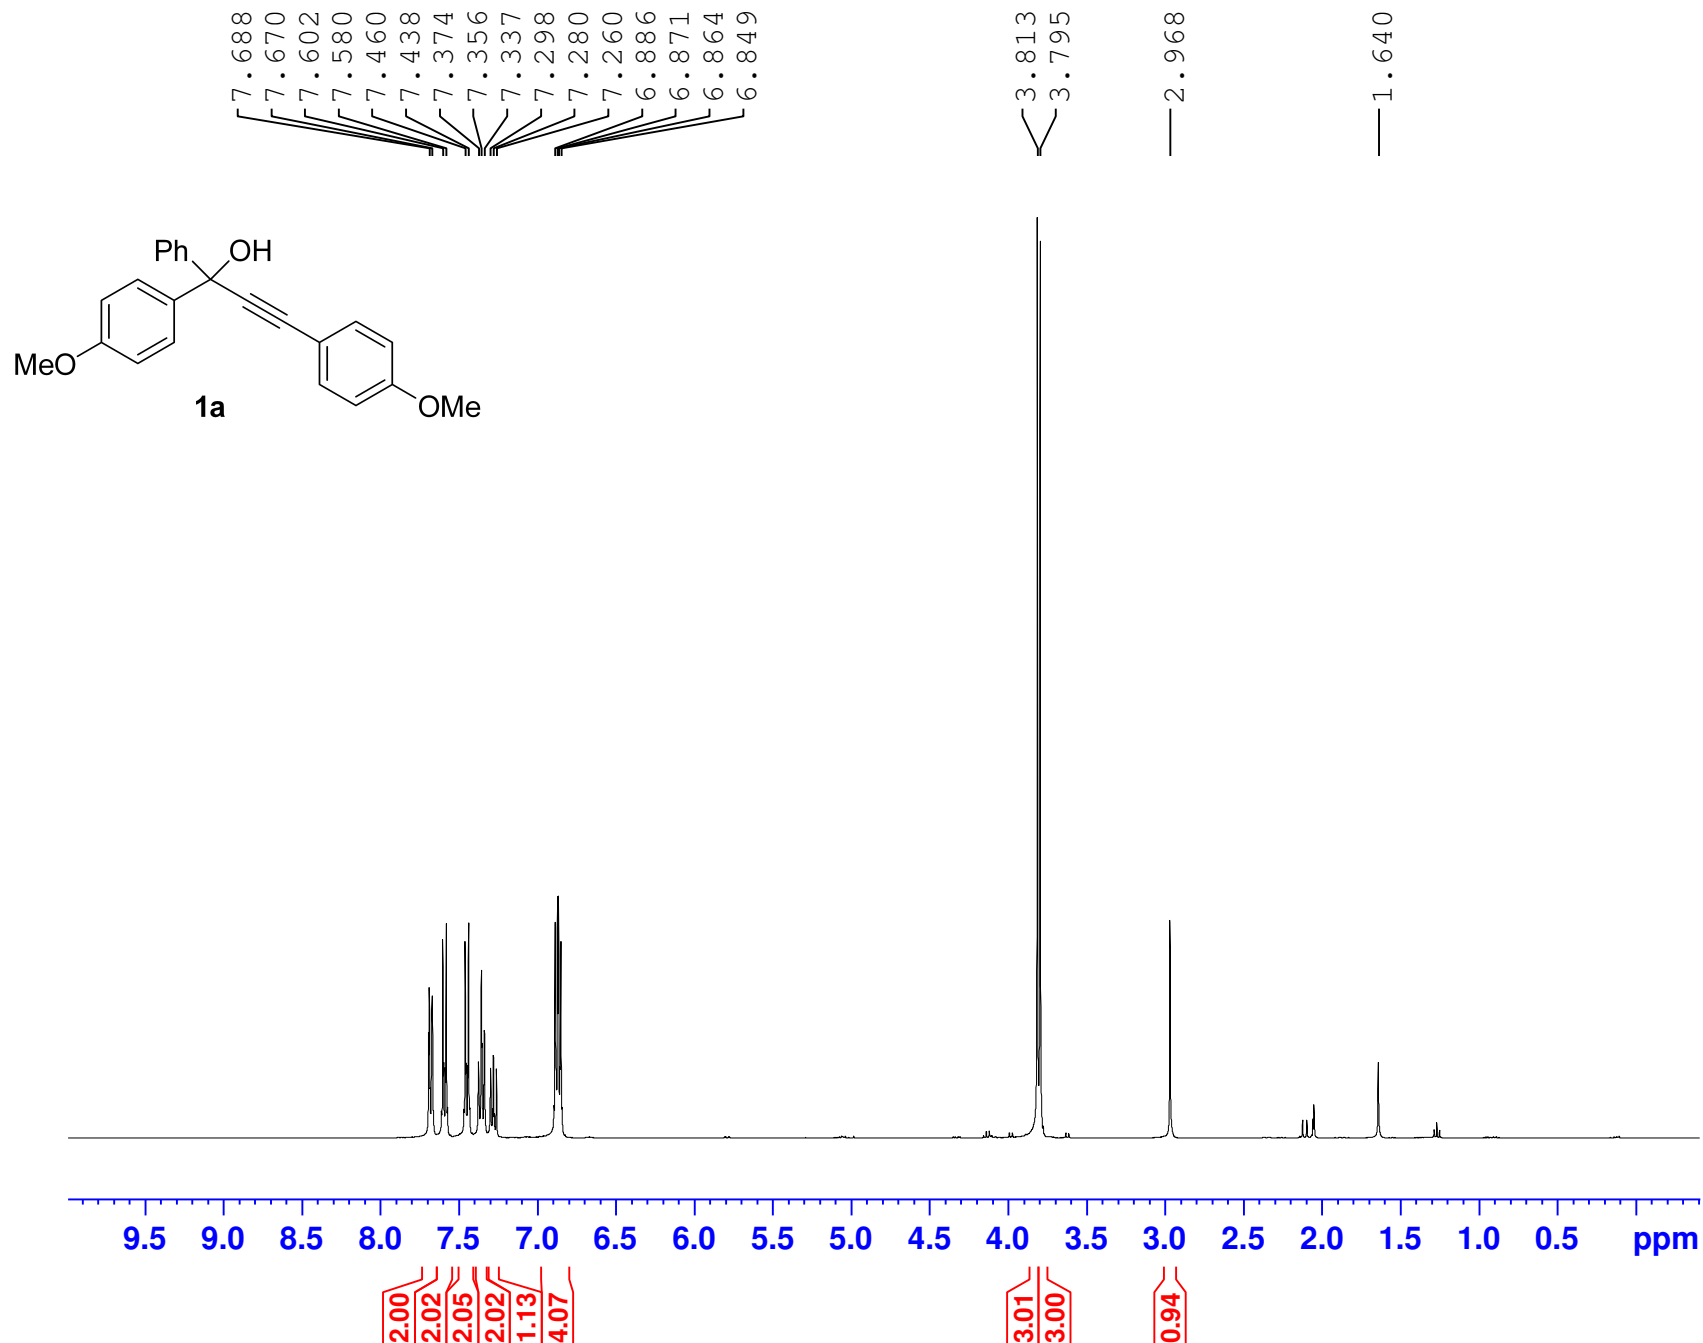

Current Data Parameters  
 NAME qdy-40004-1 H  
 EXPNO 1  
 PROCNO 1

F2 - Acquisition Parameters  
 Date\_ 20161214  
 Time 22.02  
 INSTRUM spect  
 PROBHD 5 mm DUL 13C-1  
 PULPROG zg30  
 TD 65536  
 SOLVENT CDC13  
 NS 4  
 DS 0  
 SWH 8012.820 Hz  
 FIDRES 0.122266 Hz  
 AQ 4.0894465 sec  
 RG 62.93  
 DW 62.400 usec  
 DE 6.50 usec  
 TE 296.6 K  
 D1 1.00000000 sec  
 TD0 1

==== CHANNEL f1 =====  
 SFO1 400.1324710 MHz  
 NUC1 1H  
 P1 14.30 usec  
 PLW1 9.10000038 W

F2 - Processing parameters  
 SI 65536  
 SF 400.1300092 MHz  
 WDW EM  
 SSB 0  
 LB 0.30 Hz  
 GB 0  
 PC 1.00

Supplementary Figure 1. <sup>1</sup>H NMR spectrum for 1a

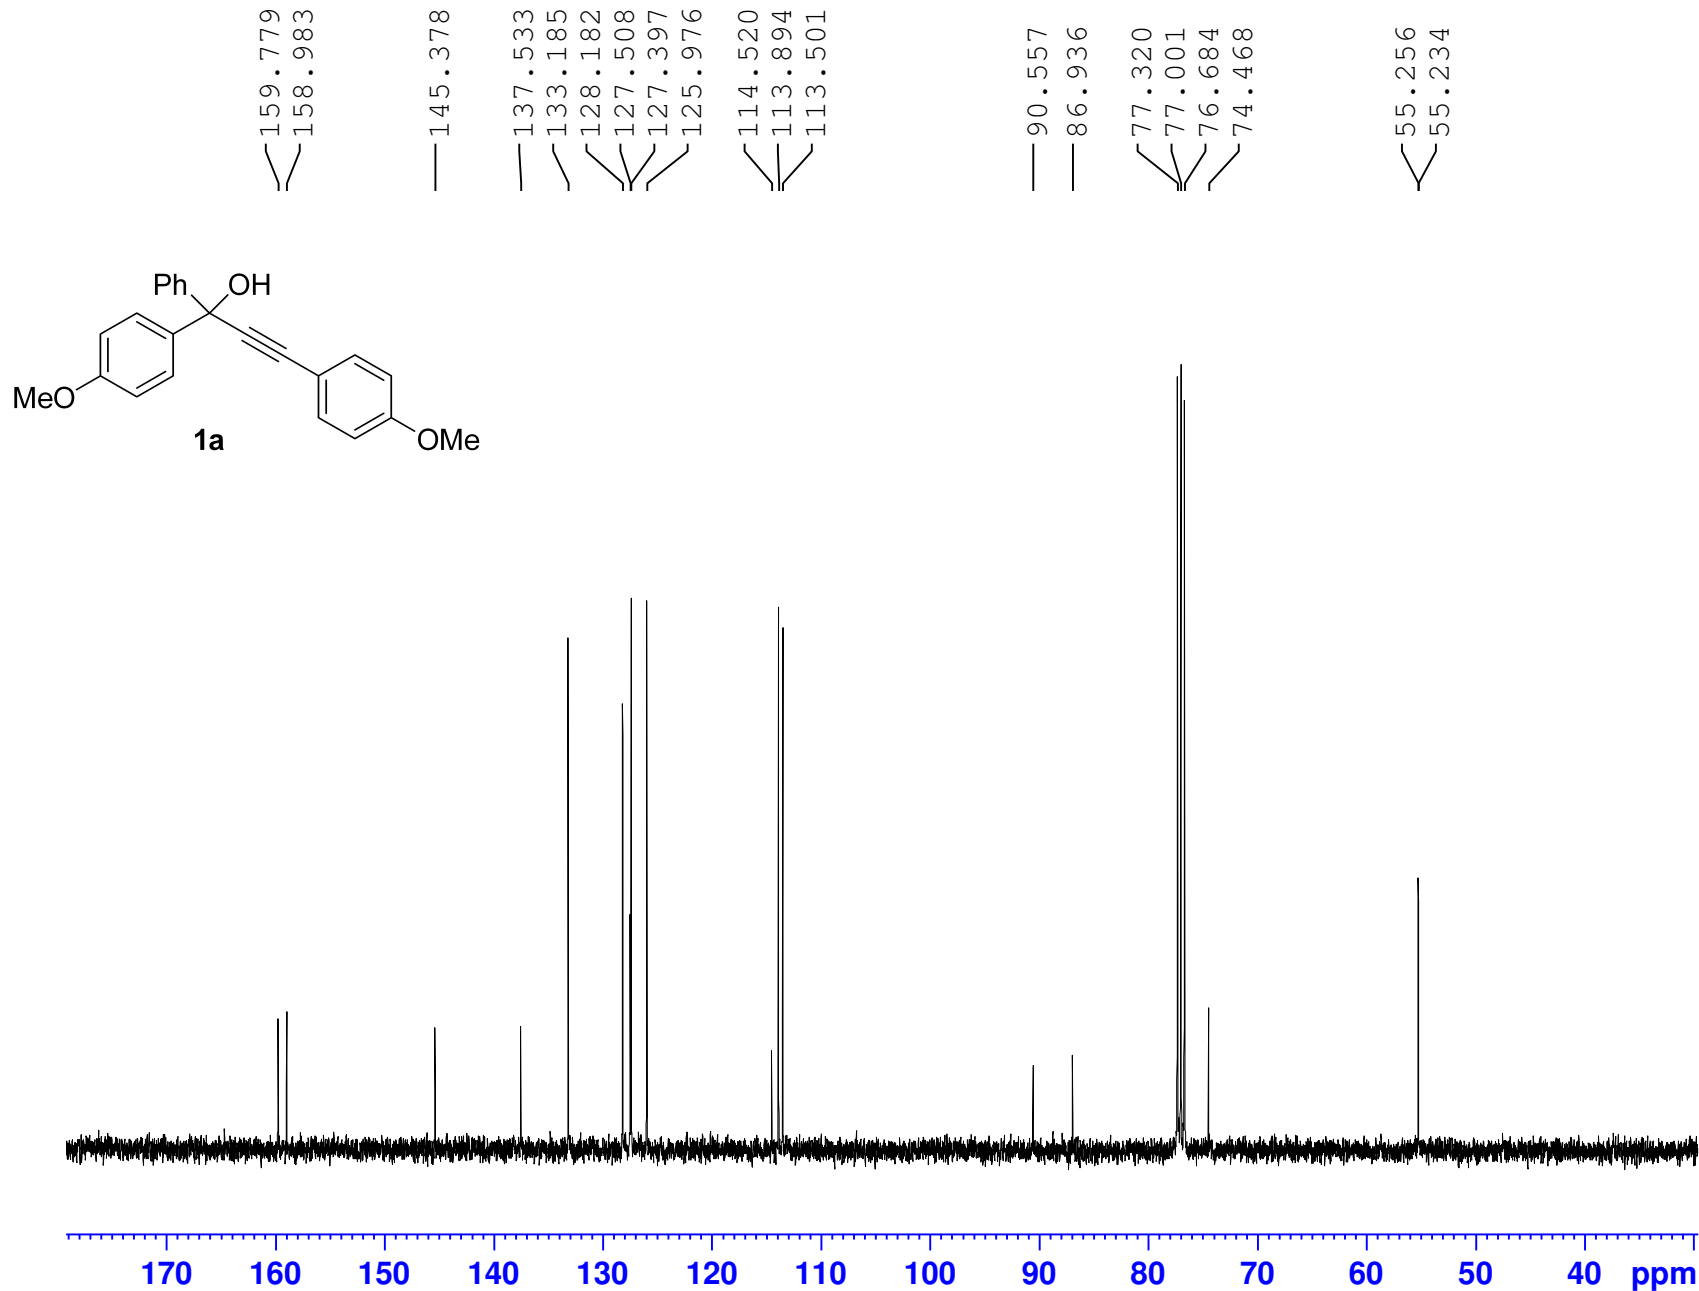

Current Data Parameters  
 NAME qdy-40004-1 C  
 EXPNO 1  
 PROCNO 1

F2 - Acquisition Parameters  
 Date\_ 20161214  
 Time 22.05  
 INSTRUM spect  
 PROBHD 5 mm DUL 13C-1  
 PULPROG zgpg30  
 TD 65536  
 SOLVENT CDC13  
 NS 46  
 DS 0  
 SWH 24038.461 Hz  
 FIDRES 0.366798 Hz  
 AQ 1.3631488 sec  
 RG 196.92  
 DW 20.800 usec  
 DE 6.50 usec  
 TE 297.2 K  
 D1 2.00000000 sec  
 D11 0.03000000 sec  
 TD0 1

==== CHANNEL f1 =====  
 SFO1 100.6228298 MHz  
 NUC1 13C  
 P1 9.60 usec  
 PLW1 31.98900032 W

==== CHANNEL f2 =====  
 SFO2 400.1316005 MHz  
 NUC2 1H  
 CPDPRG[2] waltz16  
 PCPD2 90.00 usec  
 PLW2 9.10000038 W  
 PLW12 0.24608000 W  
 PLW13 0.19933000 W

F2 - Processing parameters  
 SI 32768  
 SF 100.6127766 MHz  
 WDW EM  
 SSB 0  
 LB 1.00 Hz  
 GB 0  
 PC 1.40

Supplementary Figure 2. <sup>13</sup>C NMR spectrum for **1a**

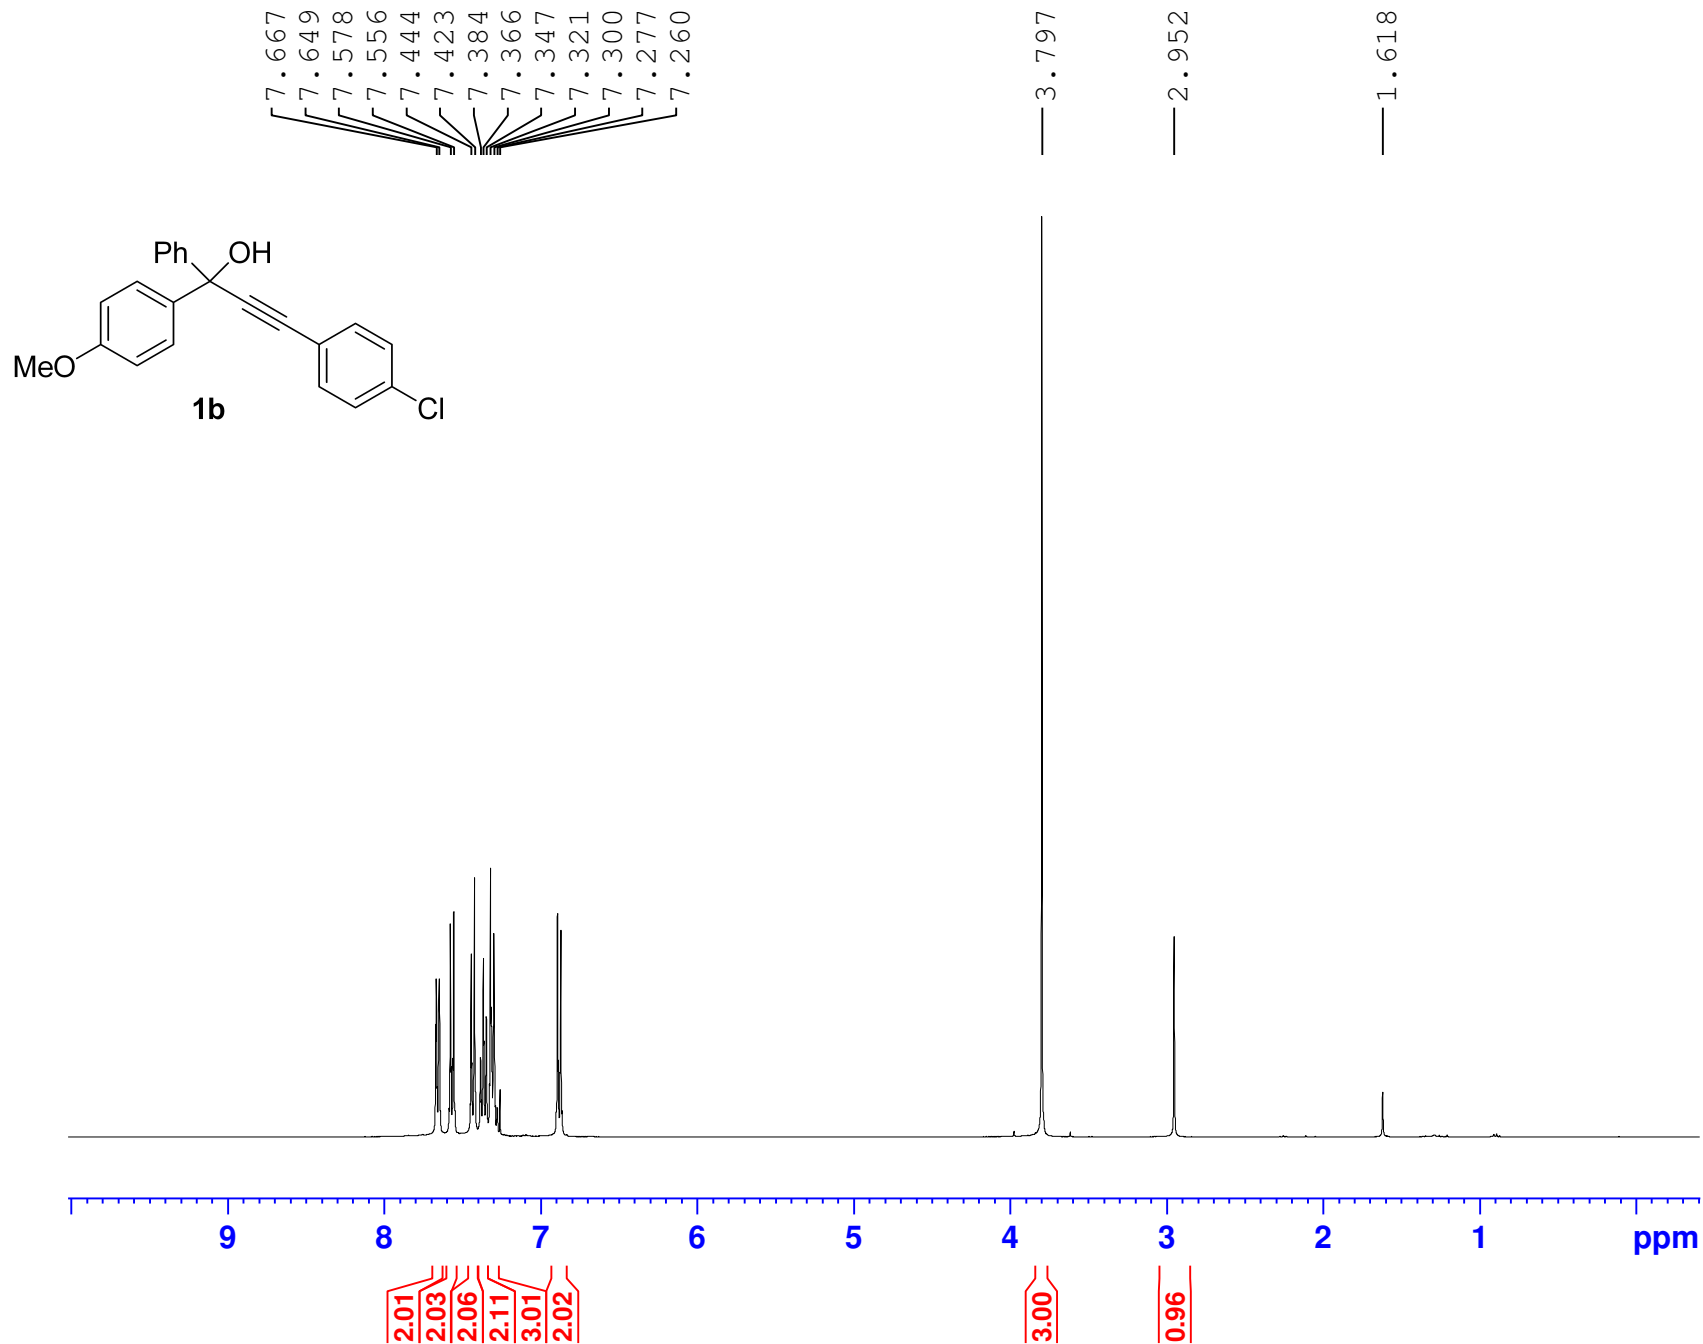

Current Data Parameters  
 NAME qdy-40006-1 H  
 EXPNO 1  
 PROCNO 1

F2 - Acquisition Parameters  
 Date\_ 20161219  
 Time 19.36  
 INSTRUM spect  
 PROBHD 5 mm PABBO BB/  
 PULPROG zg30  
 TD 65536  
 SOLVENT CDC13  
 NS 4  
 DS 0  
 SWH 8012.820 Hz  
 FIDRES 0.122266 Hz  
 AQ 4.0894465 sec  
 RG 62.93  
 DW 62.400 usec  
 DE 6.50 usec  
 TE 295.8 K  
 D1 1.00000000 sec  
 TD0 1

==== CHANNEL f1 =====  
 SFO1 400.1324710 MHz  
 NUC1 1H  
 P1 14.50 usec  
 PLW1 11.99499989 W

F2 - Processing parameters  
 SI 65536  
 SF 400.1300092 MHz  
 WDW EM  
 SSB 0  
 LB 0.30 Hz  
 GB 0  
 PC 1.00

Supplementary Figure 3. <sup>1</sup>H NMR spectrum for 1b



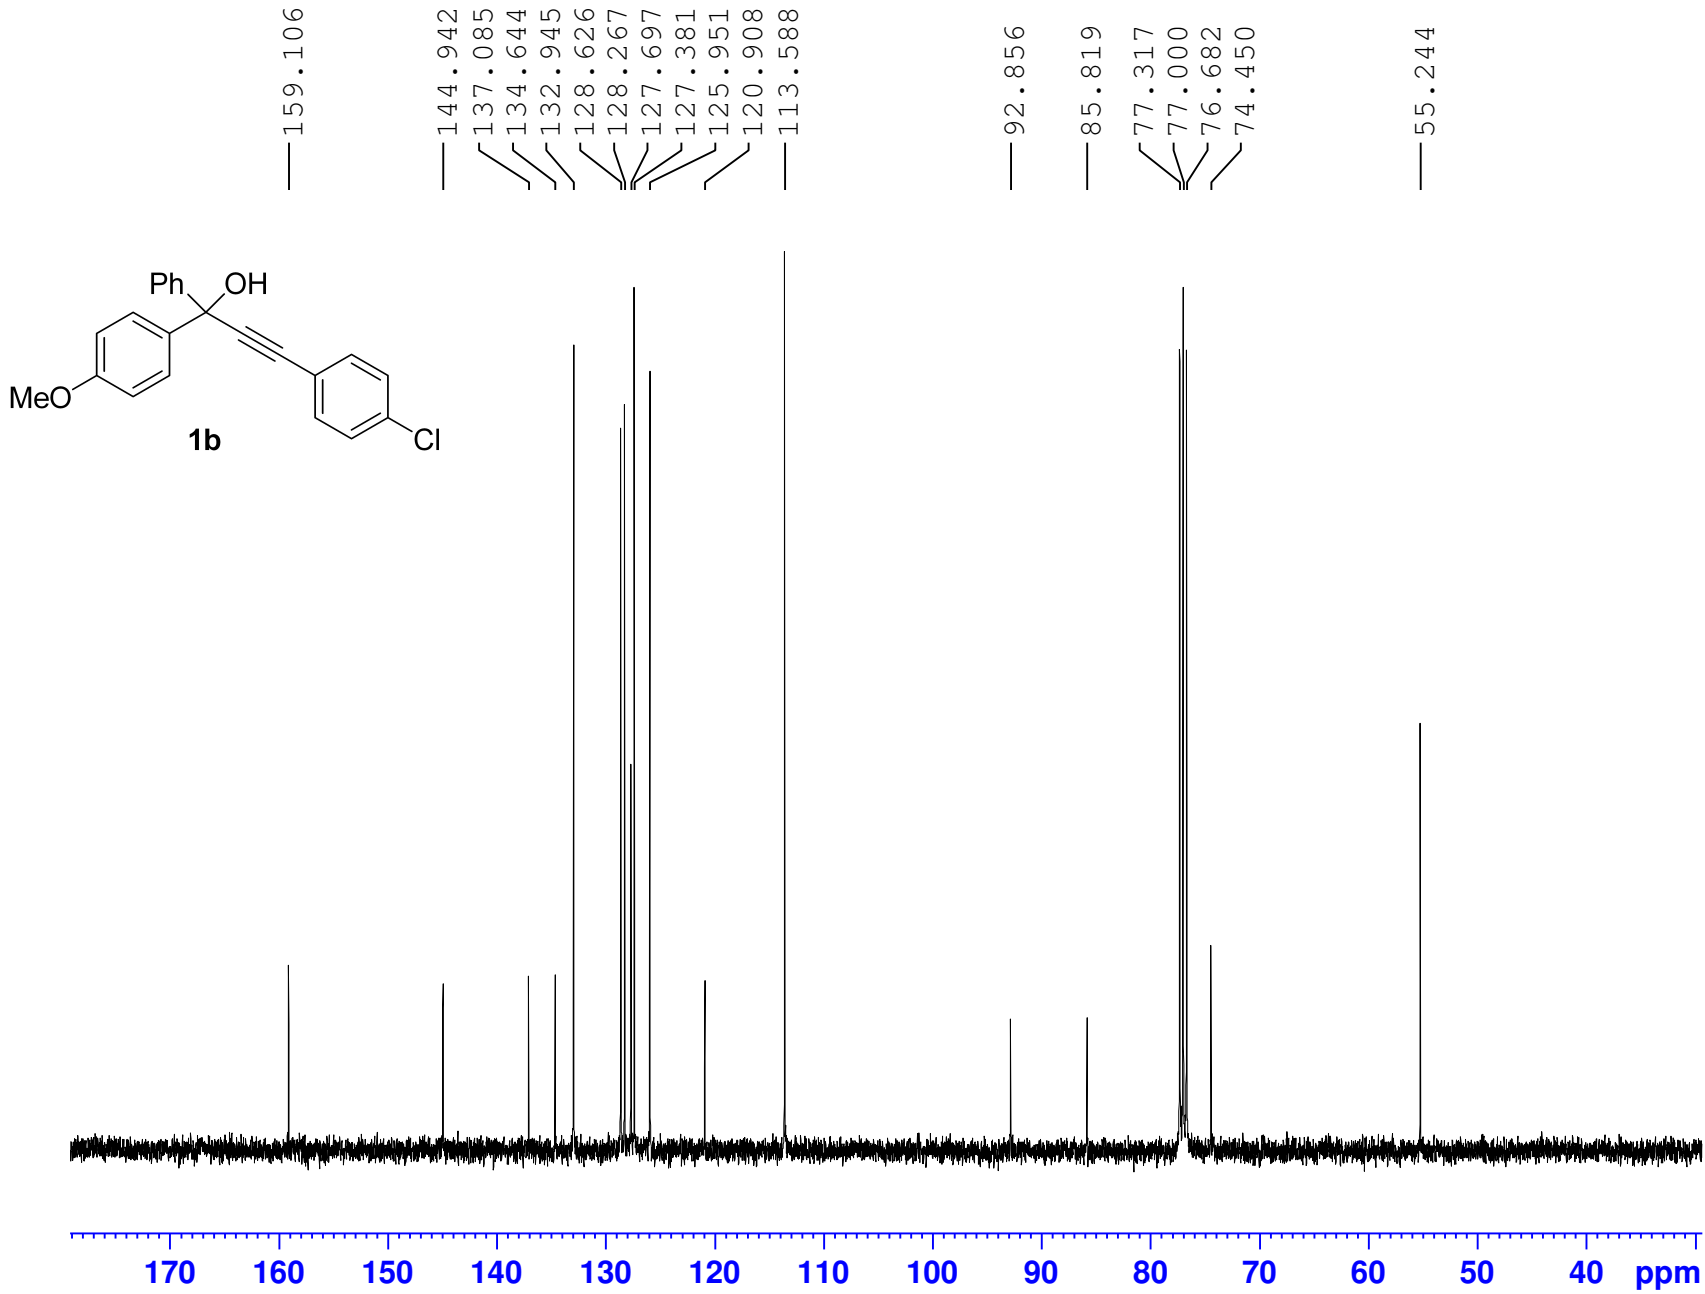

```

Current Data Parameters
NAME      qdy-40006-1  C
EXPNO     1
PROCNO    1

F2 - Acquisition Parameters
Date_     20161219
Time      19.39
INSTRUM   spect
PROBHD    5 mm PABBO BB/
PULPROG   zgpg30
TD        65536
SOLVENT   CDC13
NS        92
DS        0
SWH       24038.461 Hz
FIDRES    0.366798 Hz
AQ        1.3631488 sec
RG        196.92
DW        20.800 usec
DE        6.50 usec
TE        296.6 K
D1        2.00000000 sec
D11       0.03000000 sec
TD0       1

===== CHANNEL f1 =====
SFO1      100.6228298 MHz
NUC1      13C
P1        9.70 usec
PLW1      46.98899841 W

===== CHANNEL f2 =====
SFO2      400.1316005 MHz
NUC2      1H
CPDPRG[2  waltz16
PCPD2     90.00 usec
PLW2      11.99499989 W
PLW12     0.34213999 W
PLW13     0.27713001 W

F2 - Processing parameters
SI        32768
SF        100.6127766 MHz
WDW       EM
SSB       0
LB        1.00 Hz
GB        0
PC        1.40

```

**Supplementary Figure 4. <sup>13</sup>C NMR spectrum for 1b**

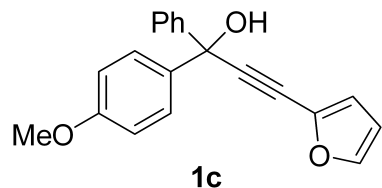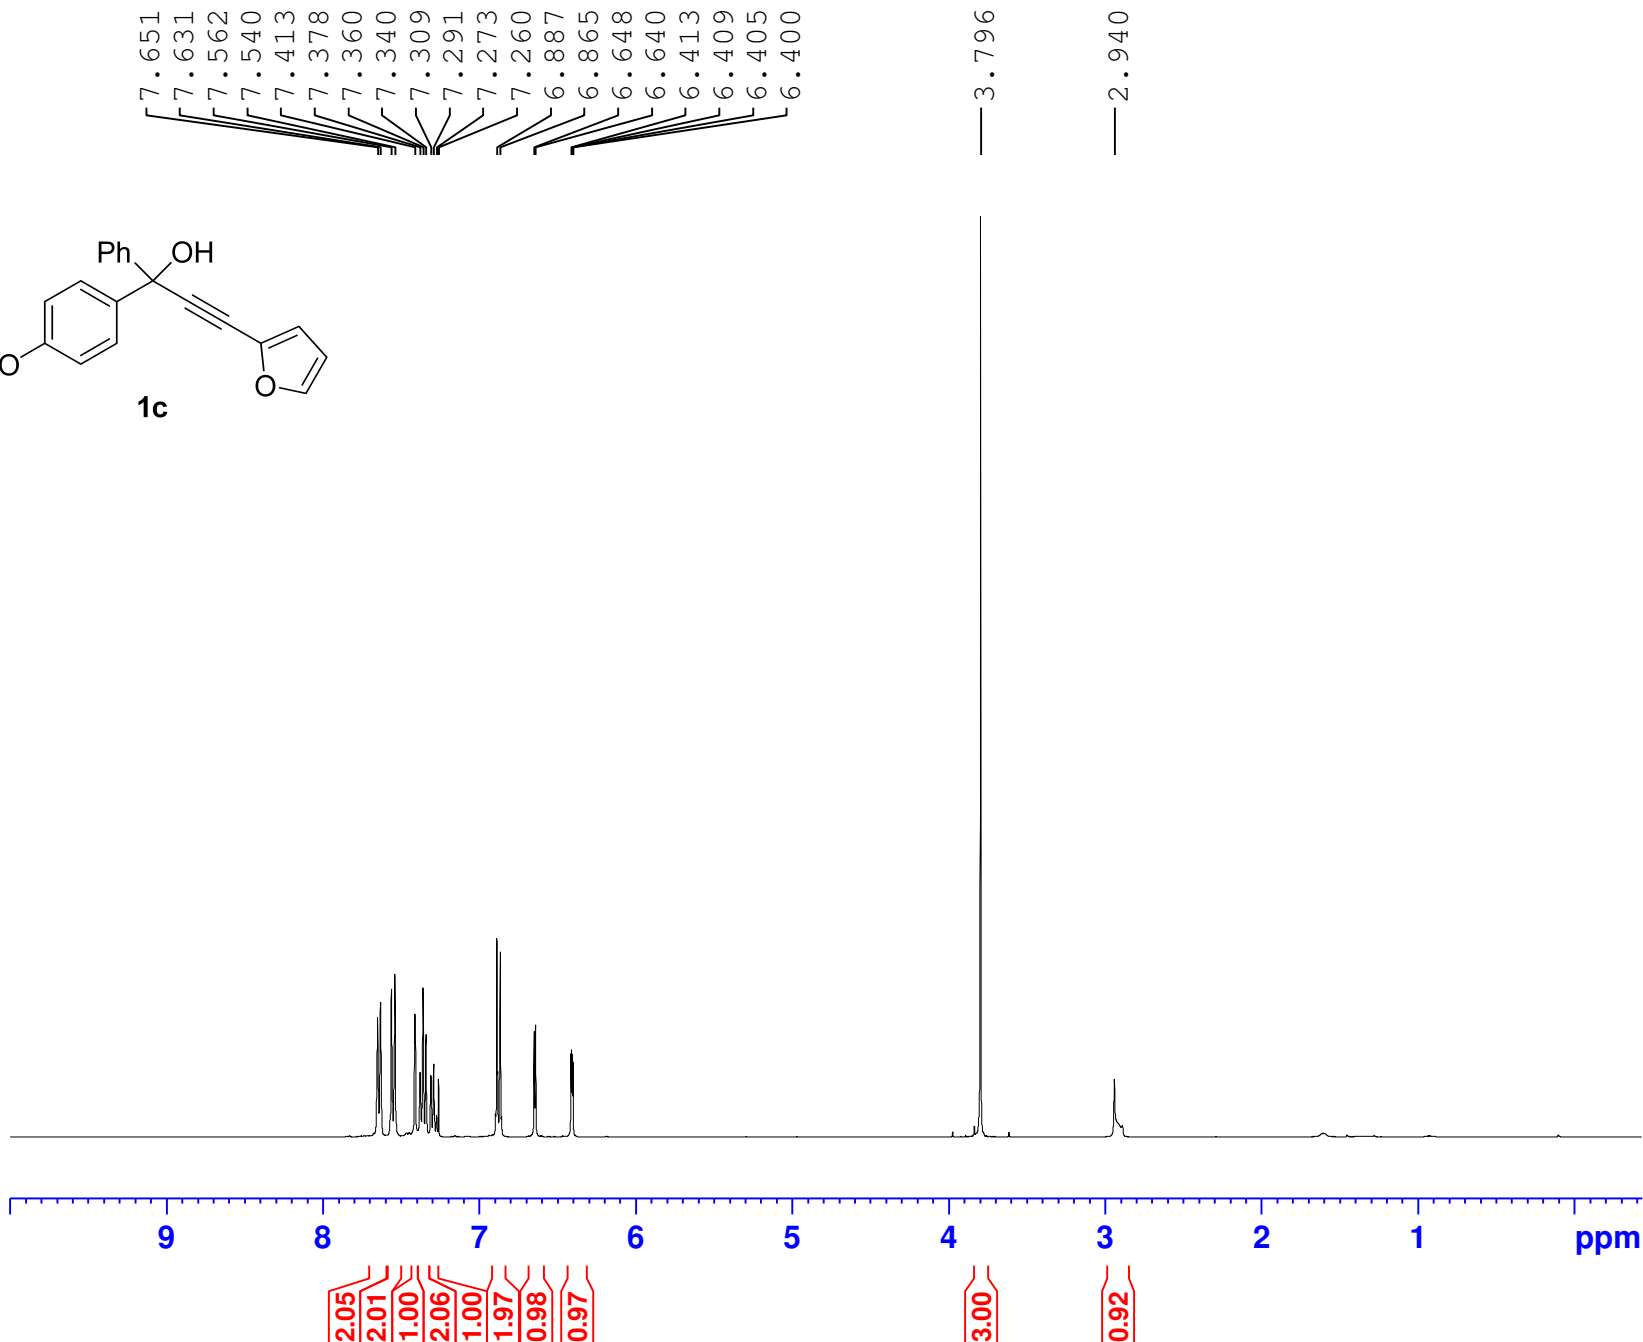

Current Data Parameters  
 NAME qdy-40025-1 H  
 EXPNO 1  
 PROCNO 1

F2 - Acquisition Parameters  
 Date\_ 20161224  
 Time 21.55  
 INSTRUM spect  
 PROBHD 5 mm PABBO BB/  
 PULPROG zg30  
 TD 65536  
 SOLVENT CDC13  
 NS 4  
 DS 0  
 SWH 8012.820 Hz  
 FIDRES 0.122266 Hz  
 AQ 4.0894465 sec  
 RG 103.52  
 DW 62.400 usec  
 DE 6.50 usec  
 TE 297.7 K  
 D1 1.00000000 sec  
 TD0 1

==== CHANNEL f1 =====  
 SFO1 400.1324710 MHz  
 NUC1 1H  
 P1 14.50 usec  
 PLW1 11.99499989 W

F2 - Processing parameters  
 SI 65536  
 SF 400.1300093 MHz  
 WDW EM  
 SSB 0  
 LB 0.30 Hz  
 GB 0  
 PC 1.00

**Supplementary Figure 5. <sup>1</sup>H NMR spectrum for 1c**

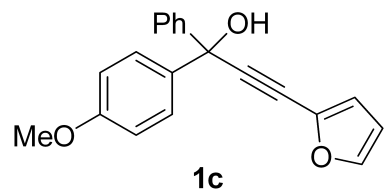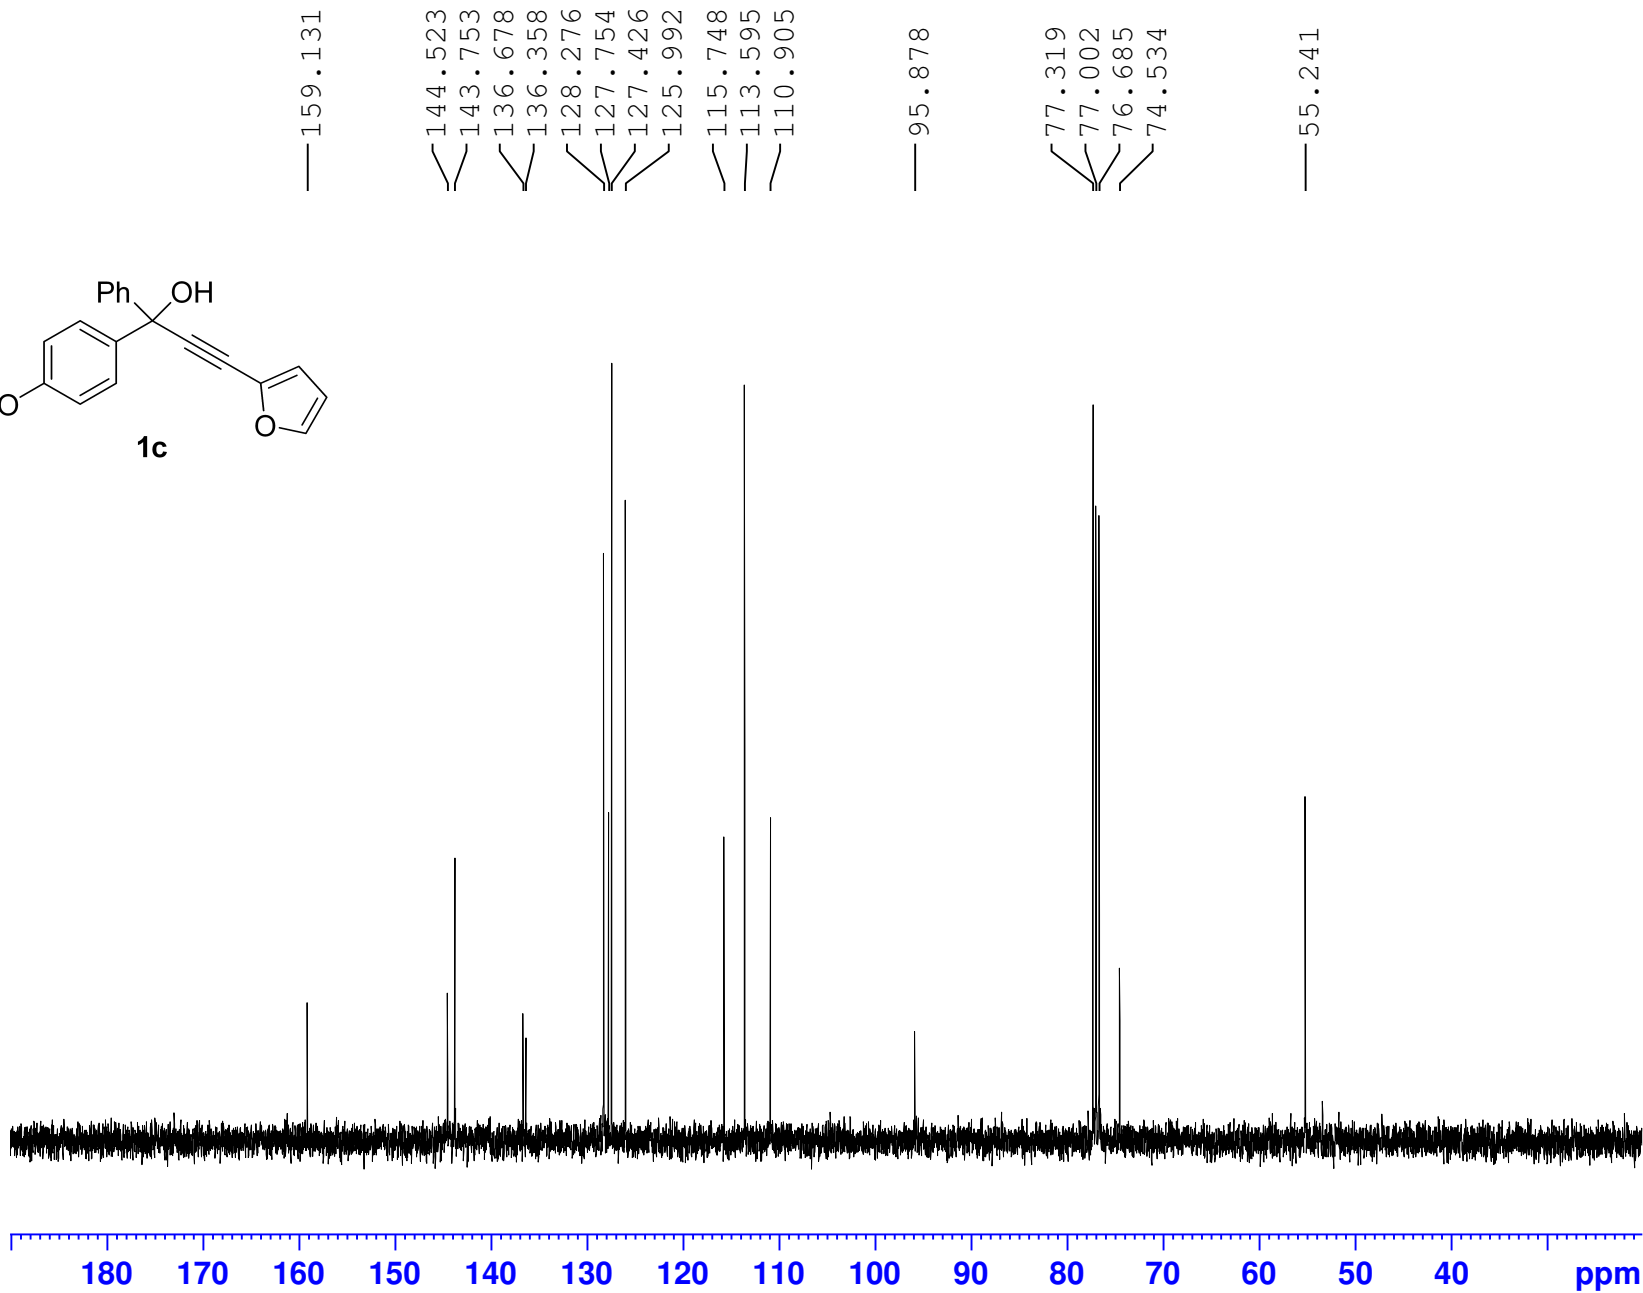

Current Data Parameters  
 NAME qdy-40025-1 C  
 EXPNO 1  
 PROCNO 1

F2 - Acquisition Parameters  
 Date\_ 20161224  
 Time 16.32  
 INSTRUM spect  
 PROBHD 5 mm PABBO BB/  
 PULPROG zgpg30  
 TD 65536  
 SOLVENT CDC13  
 NS 29  
 DS 0  
 SWH 24038.461 Hz  
 FIDRES 0.366798 Hz  
 AQ 1.3631488 sec  
 RG 196.92  
 DW 20.800 usec  
 DE 6.50 usec  
 TE 295.4 K  
 D1 2.00000000 sec  
 D11 0.03000000 sec  
 TD0 1

==== CHANNEL f1 =====  
 SFO1 100.6228298 MHz  
 NUC1 13C  
 P1 9.70 usec  
 PLW1 46.98899841 W

==== CHANNEL f2 =====  
 SFO2 400.1316005 MHz  
 NUC2 1H  
 CPDPRG[2] waltz16  
 PCPD2 90.00 usec  
 PLW2 11.99499989 W  
 PLW12 0.34213999 W  
 PLW13 0.27713001 W

F2 - Processing parameters  
 SI 32768  
 SF 100.6127773 MHz  
 WDW EM  
 SSB 0  
 LB 1.00 Hz  
 GB 0  
 PC 1.40

**Supplementary Figure 6. <sup>13</sup>C NMR spectrum for 1c**

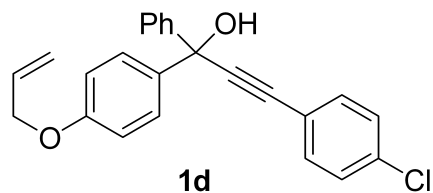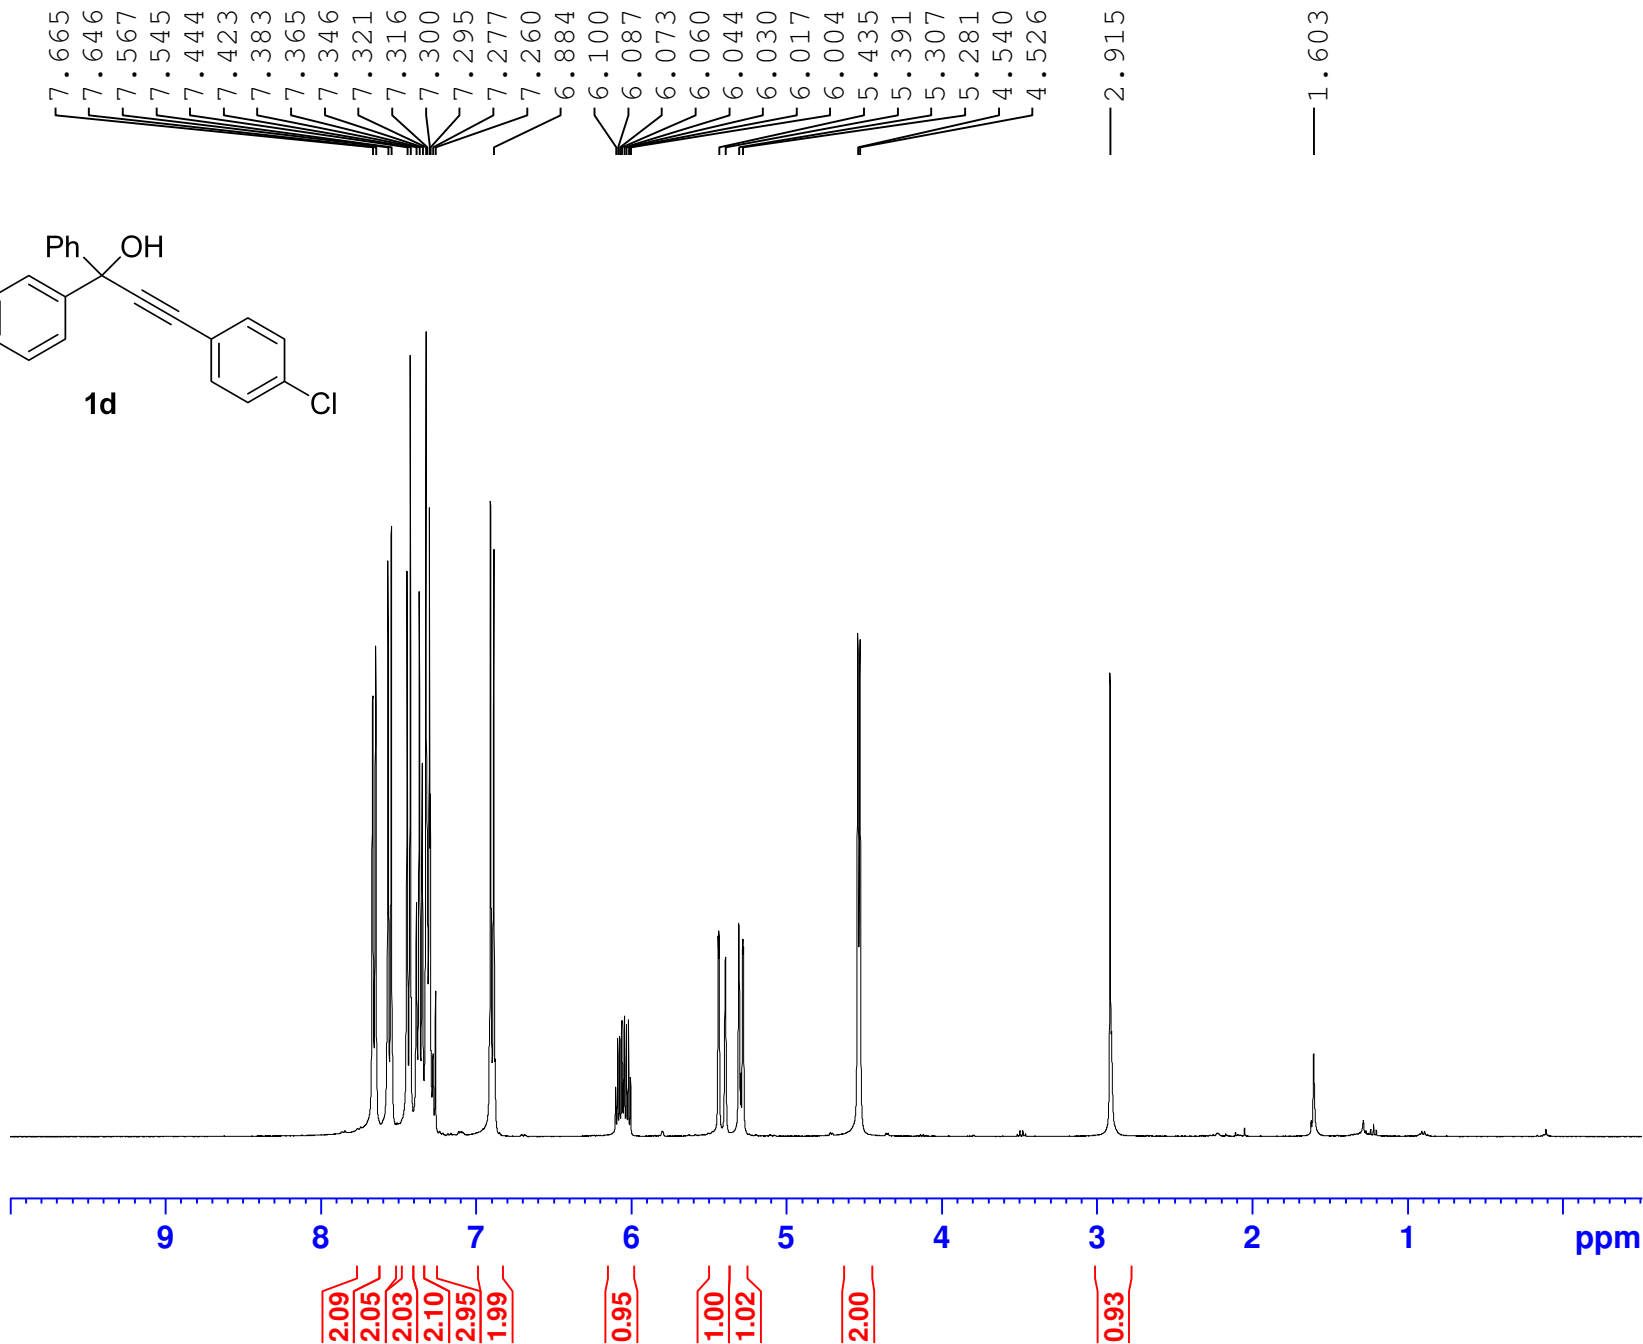

Current Data Parameters  
 NAME qdy-40021-2 H  
 EXPNO 1  
 PROCNO 1

F2 - Acquisition Parameters  
 Date\_ 20161221  
 Time 16.54  
 INSTRUM spect  
 PROBHD 5 mm PABBO BB/  
 PULPROG zg30  
 TD 65536  
 SOLVENT CDC13  
 NS 4  
 DS 0  
 SWH 8012.820 Hz  
 FIDRES 0.122266 Hz  
 AQ 4.0894465 sec  
 RG 54.81  
 DW 62.400 usec  
 DE 6.50 usec  
 TE 297.4 K  
 D1 1.00000000 sec  
 TD0 1

==== CHANNEL f1 =====  
 SFO1 400.1324710 MHz  
 NUC1 1H  
 P1 14.50 usec  
 PLW1 11.99499989 W

F2 - Processing parameters  
 SI 65536  
 SF 400.1300093 MHz  
 WDW EM  
 SSB 0  
 LB 0.30 Hz  
 GB 0  
 PC 1.00

Supplementary Figure 7. <sup>1</sup>H NMR spectrum for **1d**

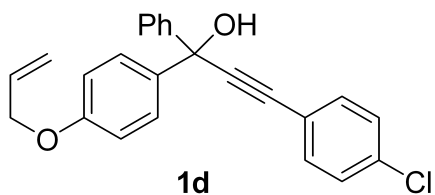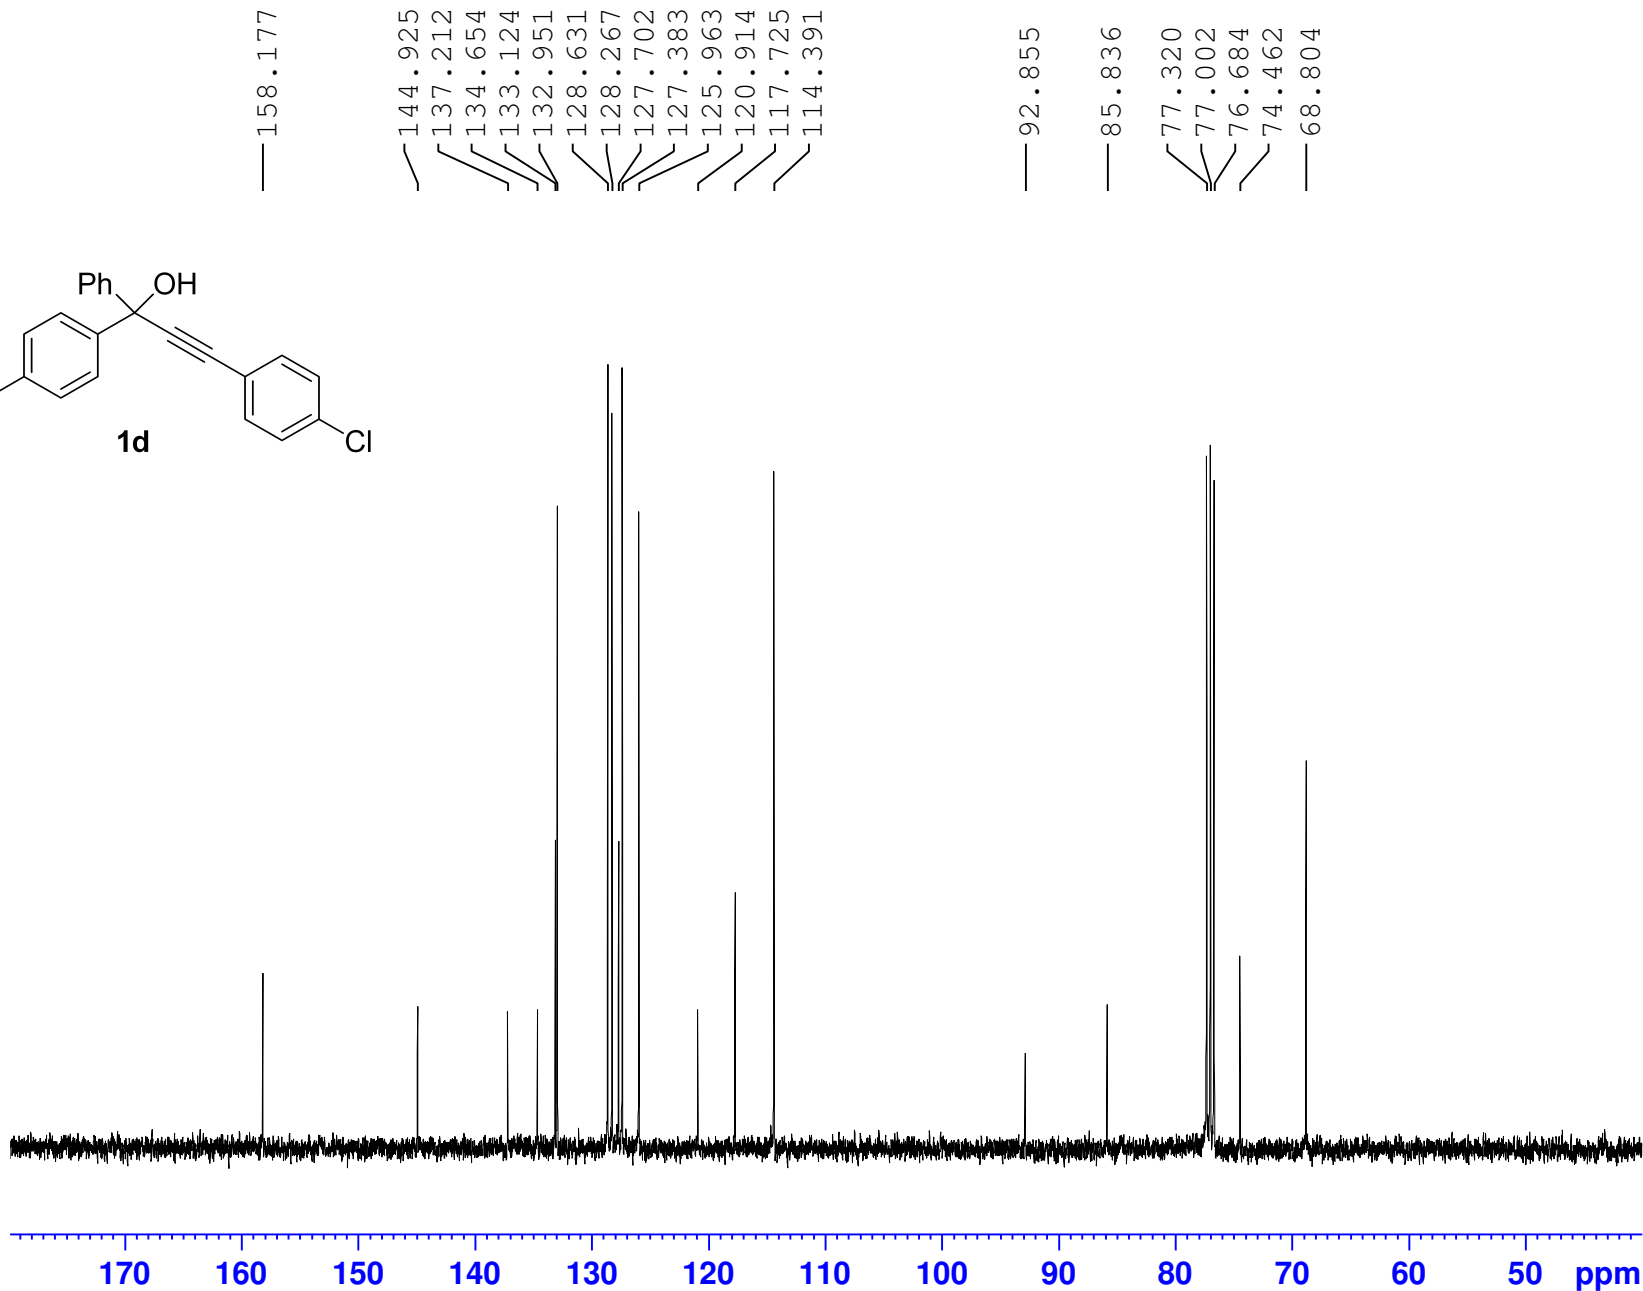

Current Data Parameters  
 NAME qdy-40021-2 C  
 EXPNO 1  
 PROCNO 1

F2 - Acquisition Parameters  
 Date\_ 20161221  
 Time 16.56  
 INSTRUM spect  
 PROBHD 5 mm PABBO BB/  
 PULPROG zgpg30  
 TD 65536  
 SOLVENT CDC13  
 NS 71  
 DS 0  
 SWH 24038.461 Hz  
 FIDRES 0.366798 Hz  
 AQ 1.3631488 sec  
 RG 196.92  
 DW 20.800 usec  
 DE 6.50 usec  
 TE 298.2 K  
 D1 2.00000000 sec  
 D11 0.03000000 sec  
 TD0 1

==== CHANNEL f1 =====  
 SFO1 100.6228298 MHz  
 NUC1 13C  
 P1 9.70 usec  
 PLW1 46.98899841 W

==== CHANNEL f2 =====  
 SFO2 400.1316005 MHz  
 NUC2 1H  
 CPDPRG[2] waltz16  
 PCPD2 90.00 usec  
 PLW2 11.99499989 W  
 PLW12 0.34213999 W  
 PLW13 0.27713001 W

F2 - Processing parameters  
 SI 32768  
 SF 100.6127759 MHz  
 WDW EM  
 SSB 0  
 LB 1.00 Hz  
 GB 0  
 PC 1.40

**Supplementary Figure 8. <sup>13</sup>C NMR spectrum for 1d**

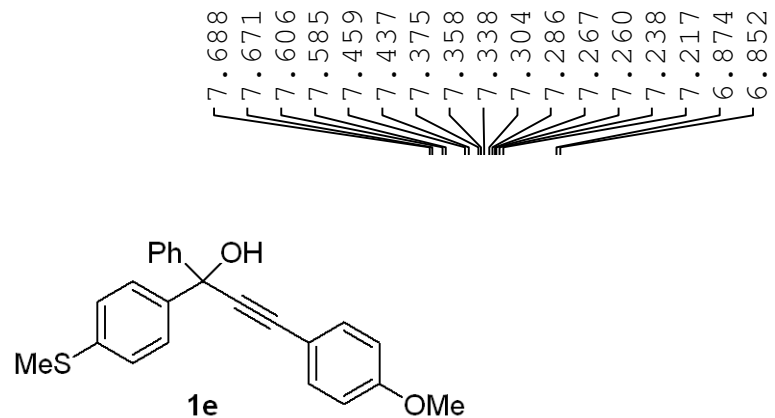

7.688  
 7.671  
 7.606  
 7.585  
 7.459  
 7.437  
 7.375  
 7.358  
 7.338  
 7.304  
 7.286  
 7.267  
 7.260  
 7.238  
 7.217  
 6.874  
 6.852

3.814  
 2.992  
 2.467

Current Data Parameters  
 NAME qdy-40017-1 H  
 EXPNO 2  
 PROCNO 1

F2 - Acquisition Parameters  
 Date\_ 20161217  
 Time 19.36  
 INSTRUM spect  
 PROBHD 5 mm PABBO BB/  
 PULPROG zg30  
 TD 65536  
 SOLVENT CDC13  
 NS 4  
 DS 0  
 SWH 8012.820 Hz  
 FIDRES 0.122266 Hz  
 AQ 4.0894465 sec  
 RG 54.81  
 DW 62.400 usec  
 DE 6.50 usec  
 TE 296.9 K  
 D1 1.00000000 sec  
 TD0 1

===== CHANNEL f1 =====  
 SFO1 400.1324710 MHz  
 NUC1 1H  
 P1 14.50 usec  
 PLW1 11.99499989 W

F2 - Processing parameters  
 SI 65536  
 SF 400.1300093 MHz  
 WDW EM  
 SSB 0  
 LB 0.30 Hz  
 GB 0  
 PC 1.00

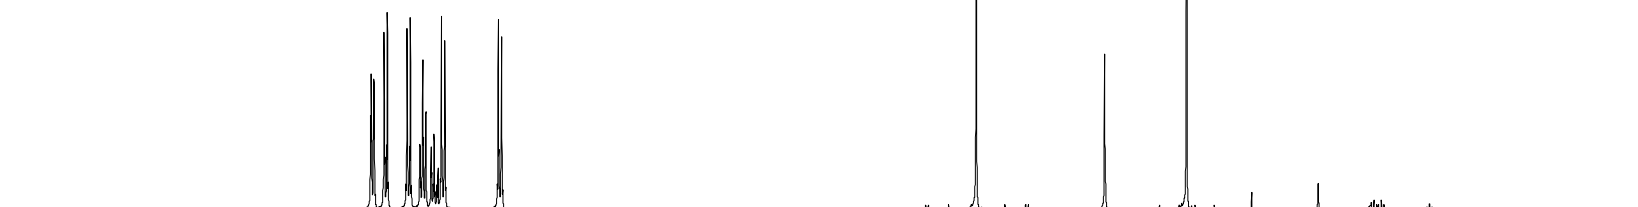

1.98  
 1.96  
 2.00  
 2.01  
 1.00  
 1.96  
 1.98

3.00  
 0.92  
 3.00

9 8 7 6 5 4 3 2 1 ppm

Supplementary Figure 9. <sup>1</sup>H NMR spectrum for **1e**

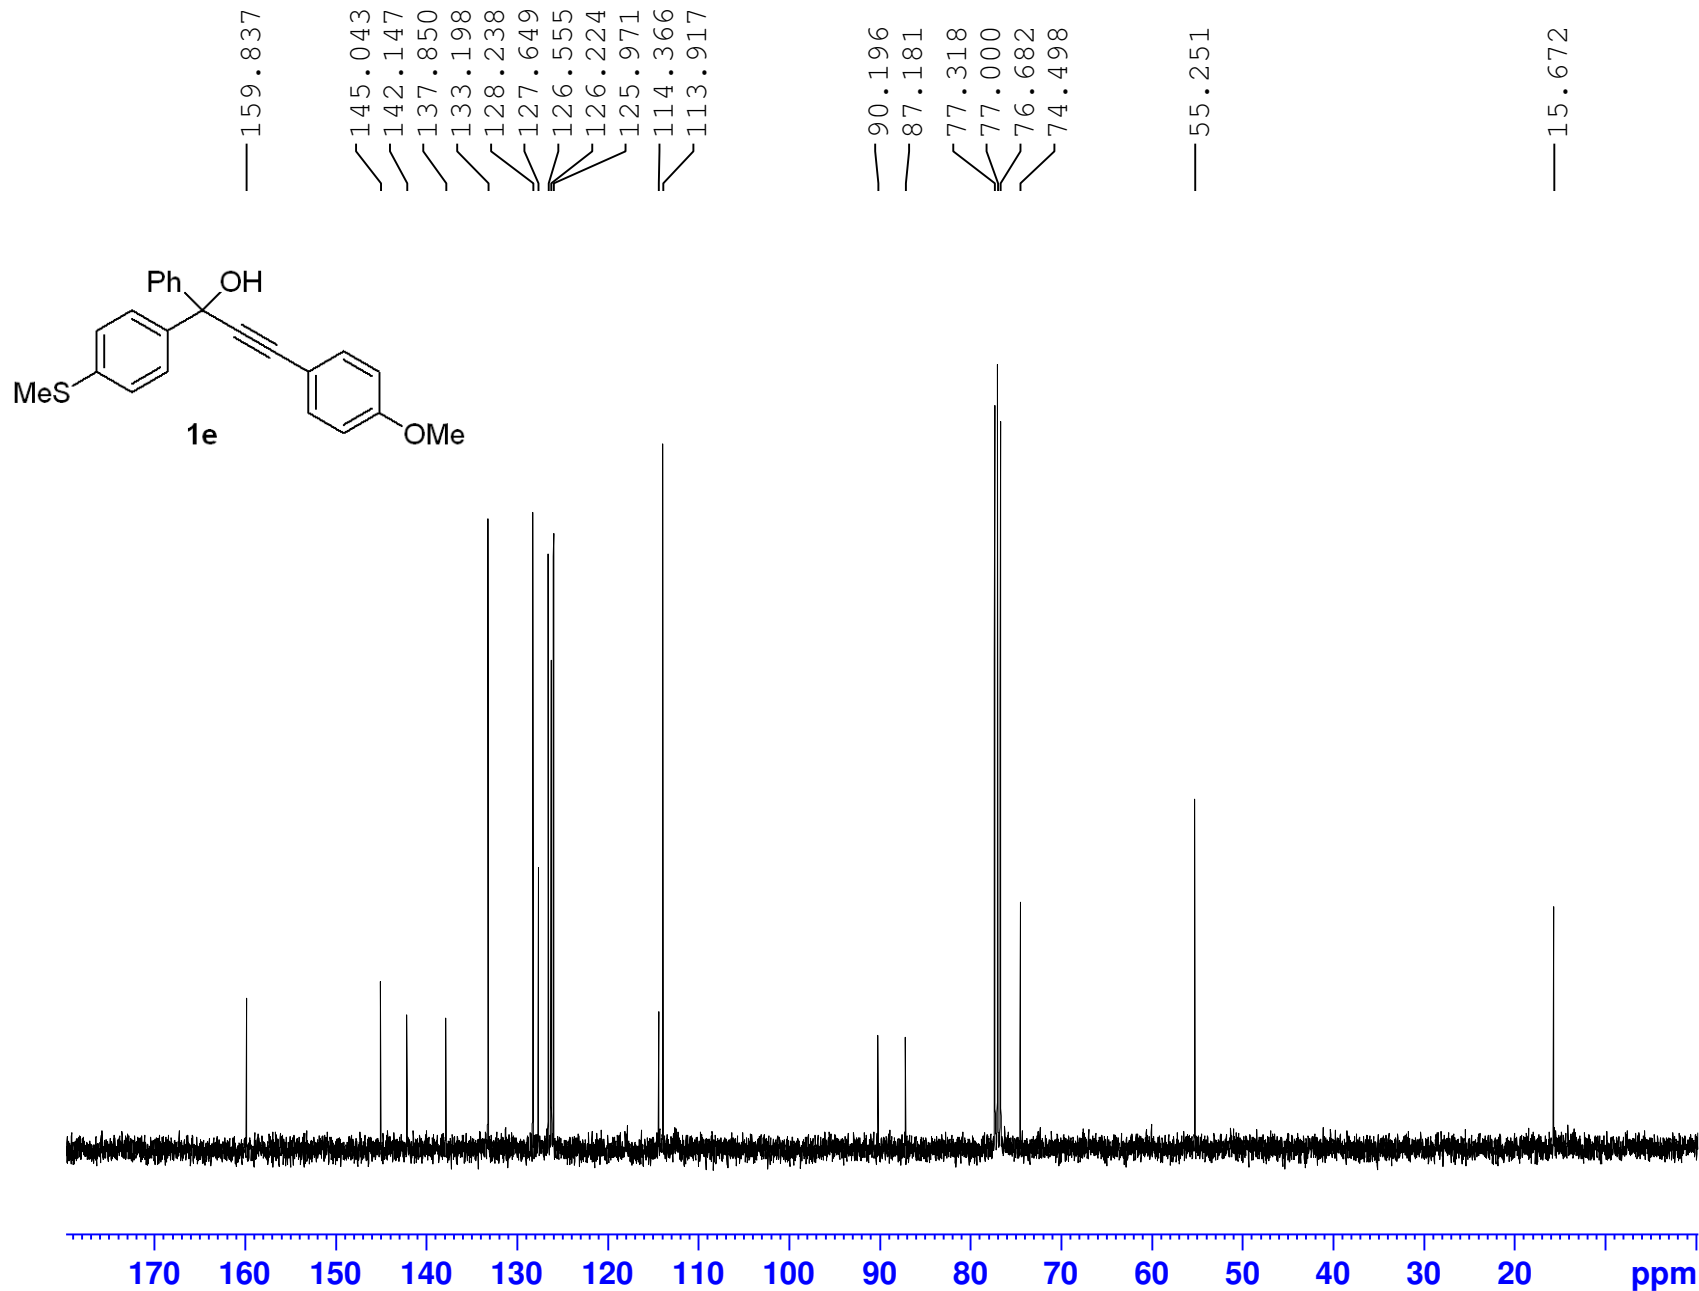

Current Data Parameters  
 NAME qdy-40017-1 C  
 EXPNO 2  
 PROCNO 1

F2 - Acquisition Parameters  
 Date\_ 20161217  
 Time 19.40  
 INSTRUM spect  
 PROBHD 5 mm PABBO BB/  
 PULPROG zgpg30  
 TD 65536  
 SOLVENT CDC13  
 NS 113  
 DS 0  
 SWH 24038.461 Hz  
 FIDRES 0.366798 Hz  
 AQ 1.3631488 sec  
 RG 196.92  
 DW 20.800 usec  
 DE 6.50 usec  
 TE 297.8 K  
 D1 2.00000000 sec  
 D11 0.03000000 sec  
 TD0 1

==== CHANNEL f1 =====  
 SFO1 100.6228298 MHz  
 NUC1 13C  
 P1 9.70 usec  
 PLW1 46.98899841 W

==== CHANNEL f2 =====  
 SFO2 400.1316005 MHz  
 NUC2 1H  
 CPDPRG[2] waltz16  
 PCPD2 90.00 usec  
 PLW2 11.99499989 W  
 PLW12 0.34213999 W  
 PLW13 0.27713001 W

F2 - Processing parameters  
 SI 32768  
 SF 100.6127780 MHz  
 WDW EM  
 SSB 0  
 LB 1.00 Hz  
 GB 0  
 PC 1.40

Supplementary Figure 10. <sup>13</sup>C NMR spectrum for **1e**

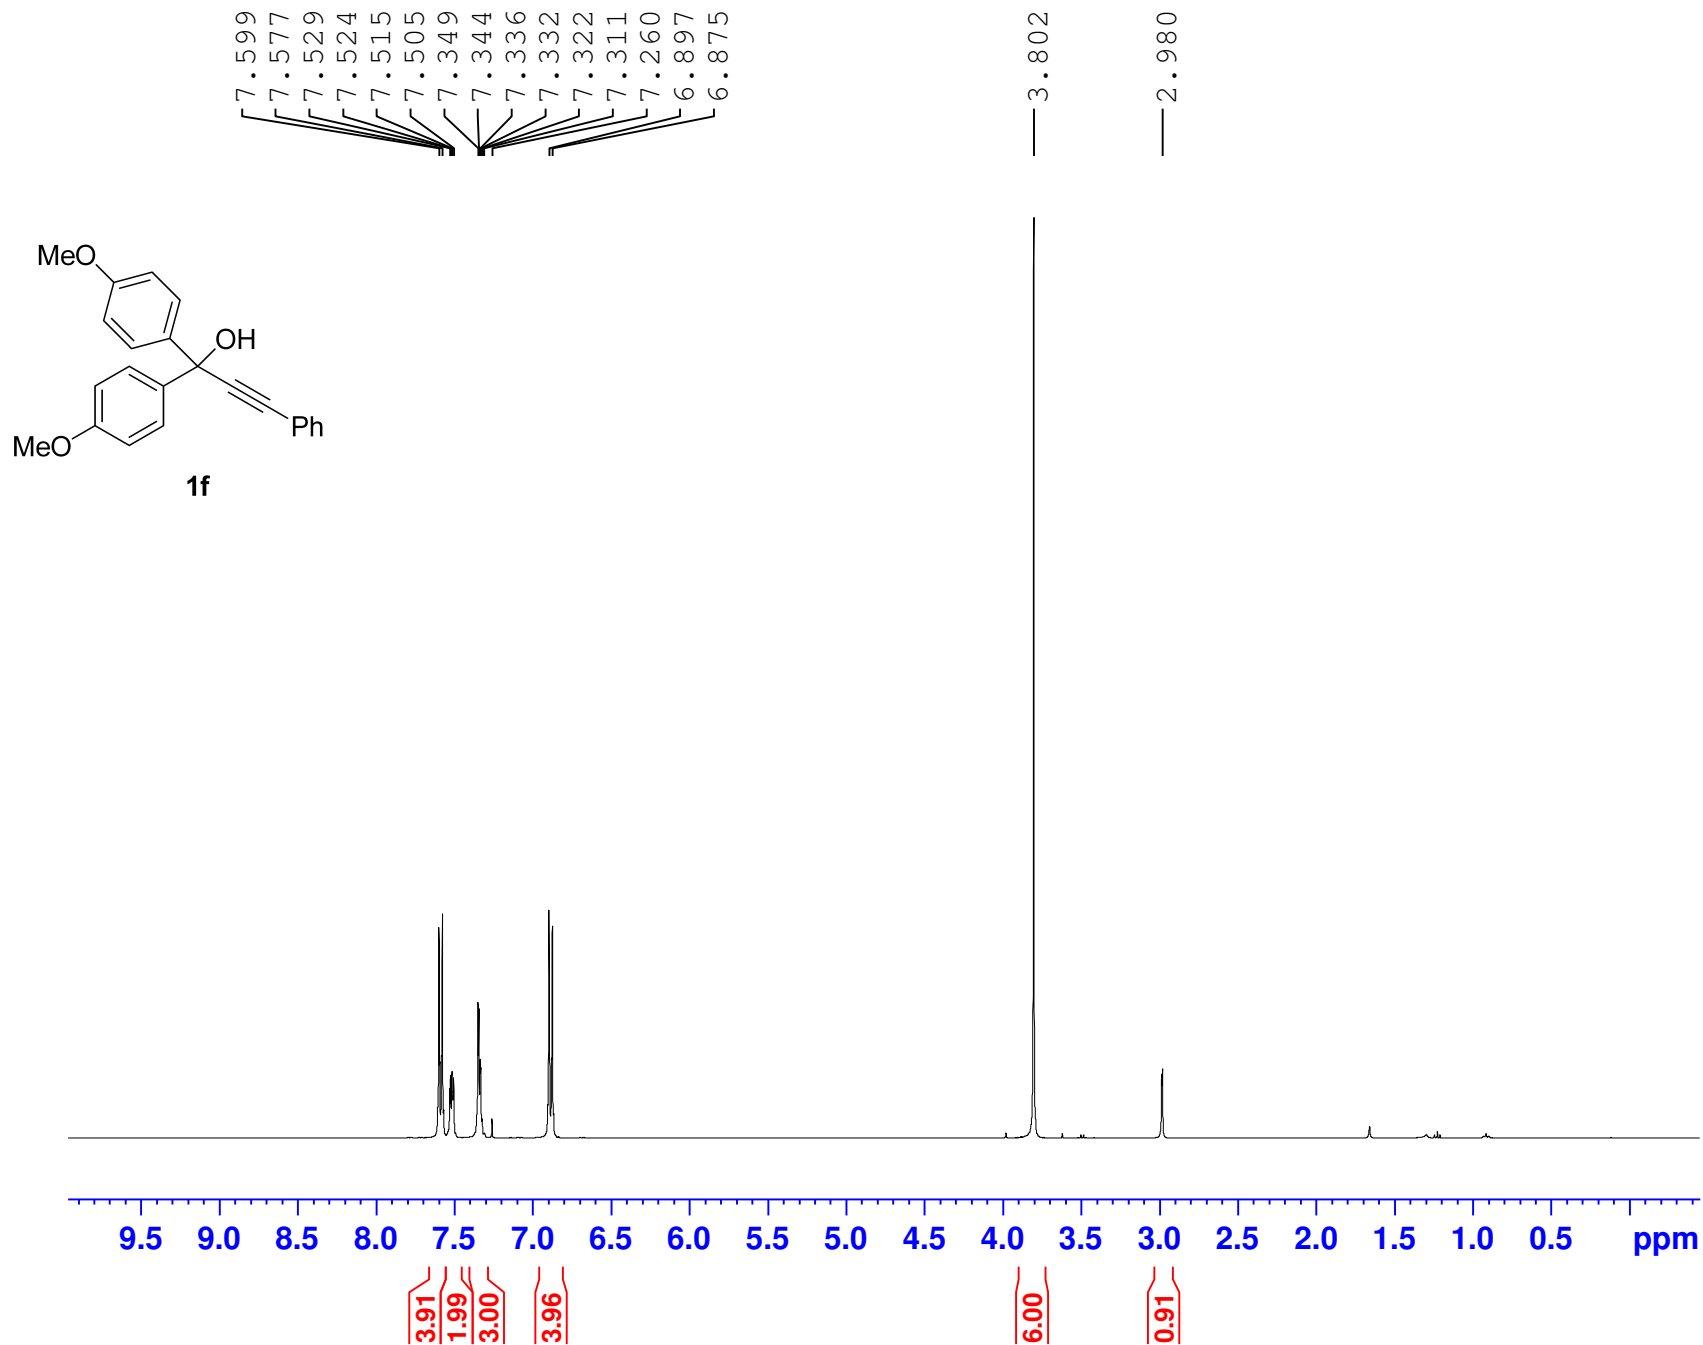

Current Data Parameters  
 NAME qdy-30184 H  
 EXPNO 2  
 PROCNO 1

F2 - Acquisition Parameters  
 Date\_ 20170116  
 Time 14.10  
 INSTRUM spect  
 PROBHD 5 mm PABBO BB/  
 PULPROG zg30  
 TD 65536  
 SOLVENT CDC13  
 NS 4  
 DS 0  
 SWH 8012.820 Hz  
 FIDRES 0.122266 Hz  
 AQ 4.0894465 sec  
 RG 54.81  
 DW 62.400 usec  
 DE 6.50 usec  
 TE 295.5 K  
 D1 1.00000000 sec  
 TD0 1

==== CHANNEL f1 =====  
 SFO1 400.1324710 MHz  
 NUC1 1H  
 P1 14.50 usec  
 PLW1 11.99499989 W

F2 - Processing parameters  
 SI 65536  
 SF 400.1300100 MHz  
 WDW EM  
 SSB 0  
 LB 0.30 Hz  
 GB 0  
 PC 1.00

Supplementary Figure 11. <sup>1</sup>H NMR spectrum for **1f**



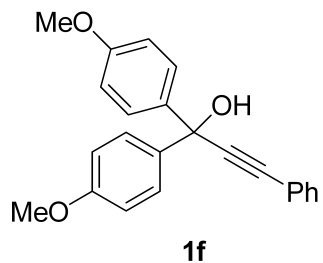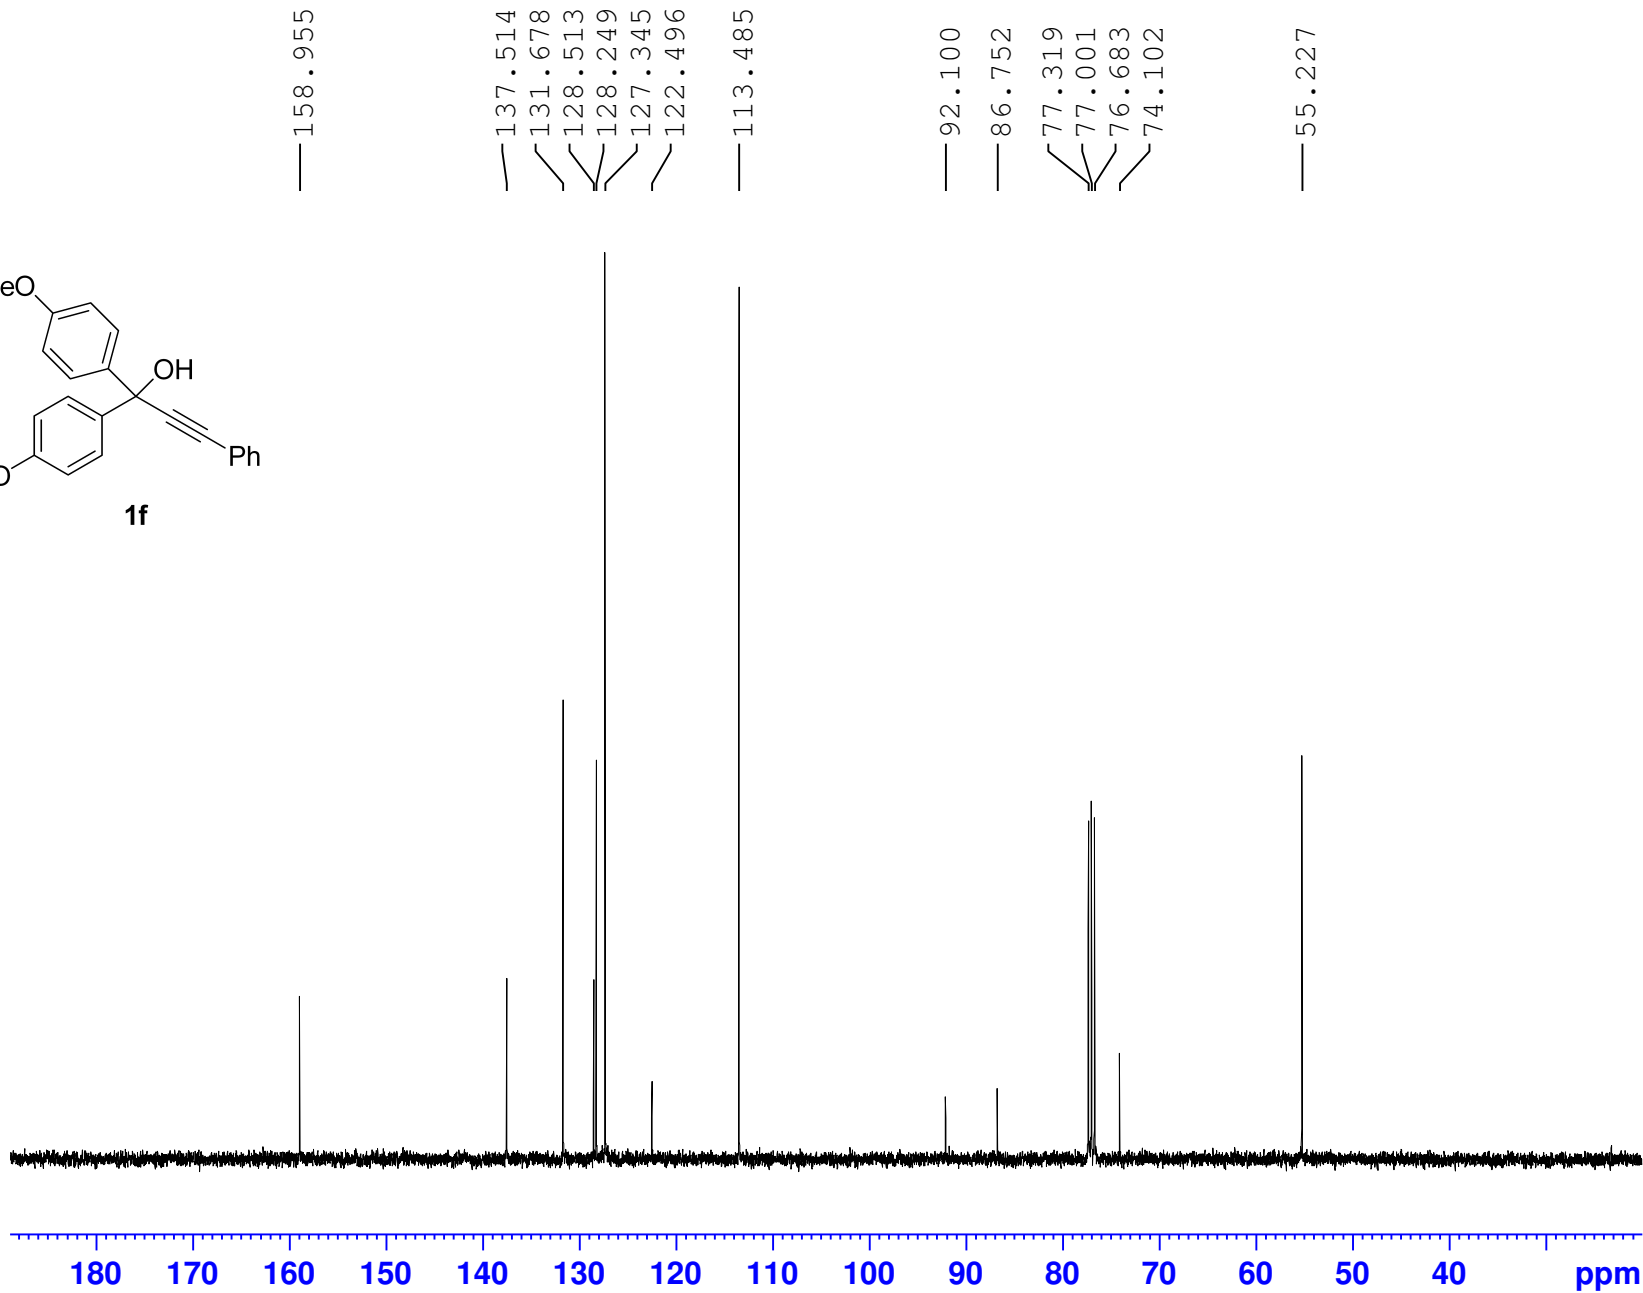

Current Data Parameters  
 NAME qdy-30184 C  
 EXPNO 2  
 PROCNO 1

F2 - Acquisition Parameters  
 Date\_ 20170116  
 Time 14.12  
 INSTRUM spect  
 PROBHD 5 mm PABBO BB/  
 PULPROG zgpg30  
 TD 65536  
 SOLVENT CDC13  
 NS 60  
 DS 0  
 SWH 24038.461 Hz  
 FIDRES 0.366798 Hz  
 AQ 1.3631488 sec  
 RG 196.92  
 DW 20.800 usec  
 DE 6.50 usec  
 TE 296.3 K  
 D1 2.00000000 sec  
 D11 0.03000000 sec  
 TD0 1

==== CHANNEL f1 =====  
 SFO1 100.6228298 MHz  
 NUC1 13C  
 P1 9.70 usec  
 PLW1 46.98899841 W

==== CHANNEL f2 =====  
 SFO2 400.1316005 MHz  
 NUC2 1H  
 CPDPRG[2] waltz16  
 PCPD2 90.00 usec  
 PLW2 11.99499989 W  
 PLW12 0.34213999 W  
 PLW13 0.27713001 W

F2 - Processing parameters  
 SI 32768  
 SF 100.6127788 MHz  
 WDW EM  
 SSB 0  
 LB 1.00 Hz  
 GB 0  
 PC 1.40

**Supplementary Figure 12. <sup>13</sup>C NMR spectrum for 1f**

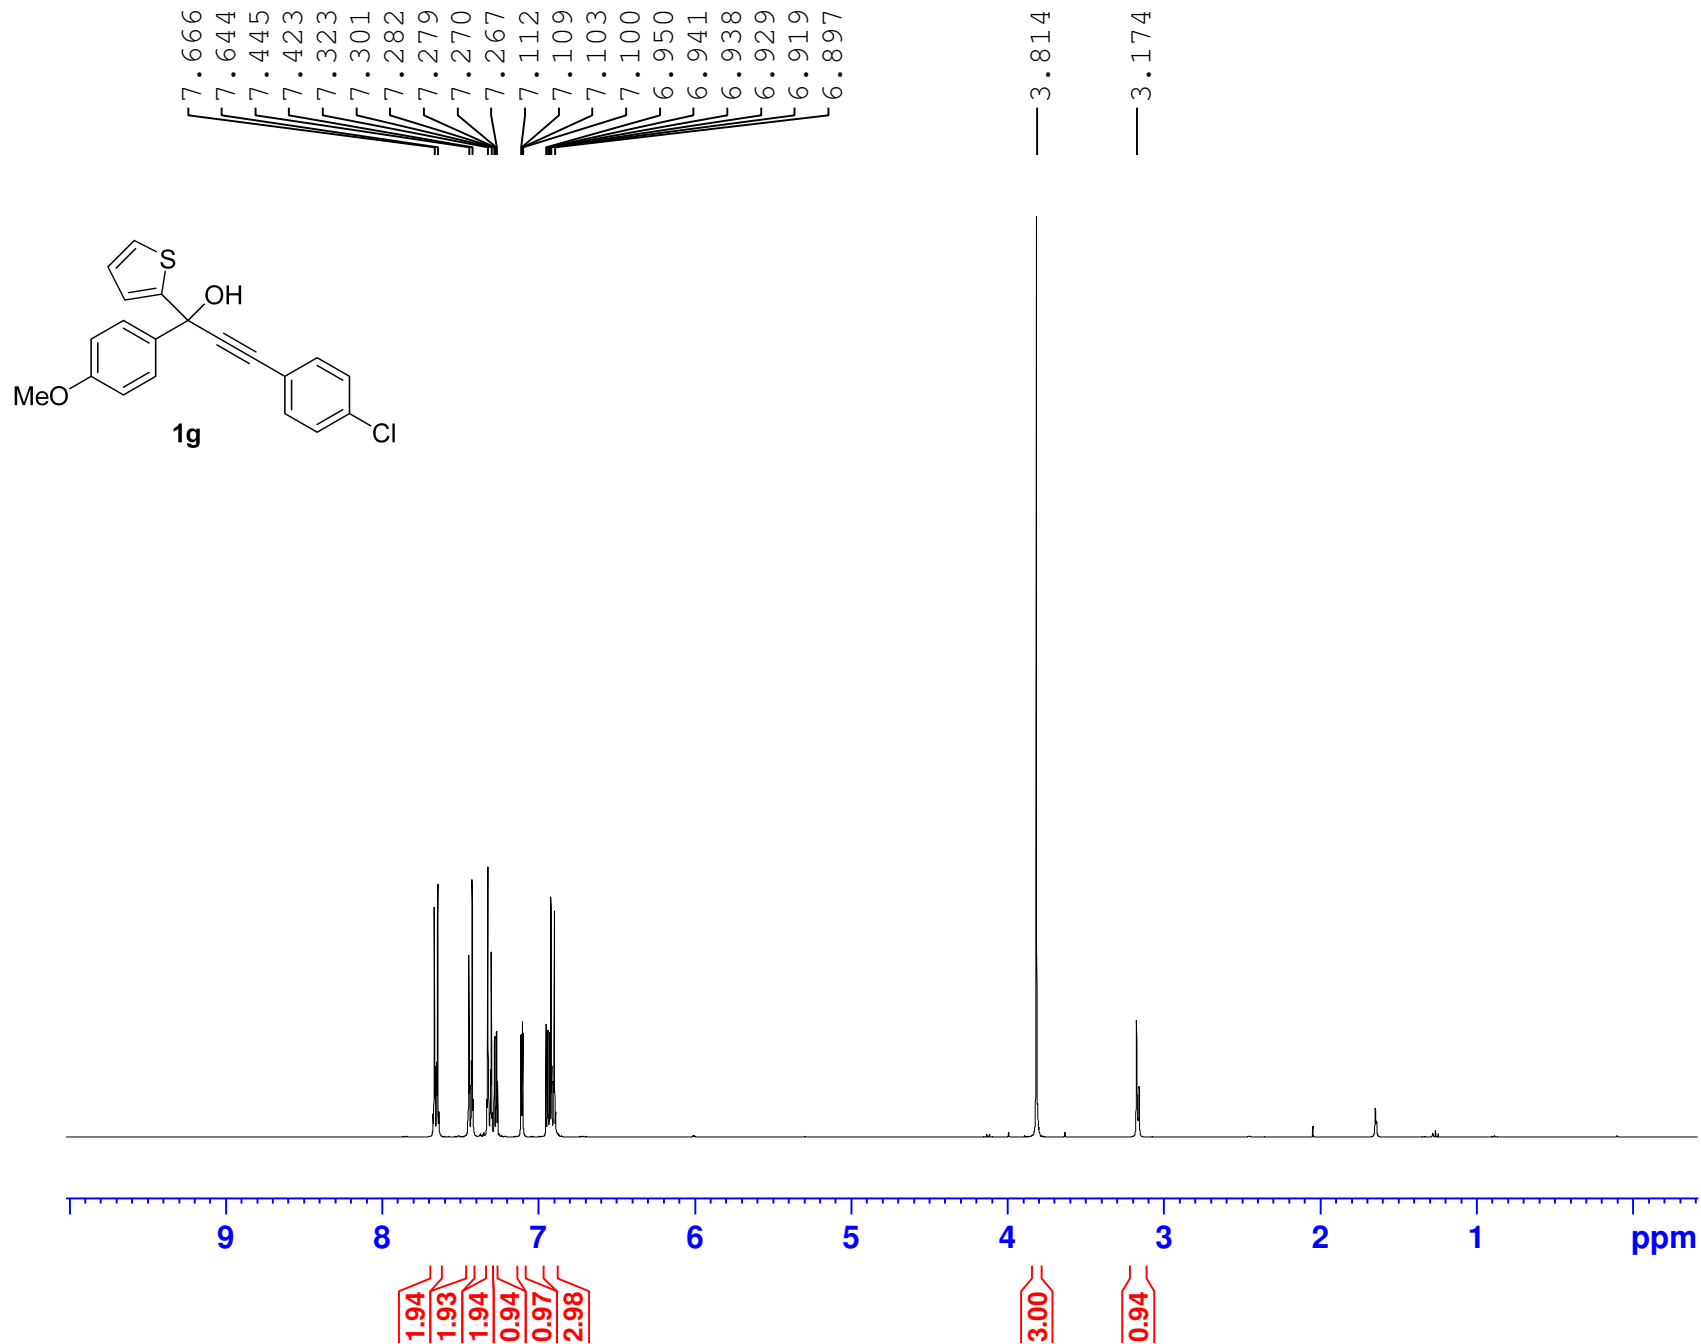

Current Data Parameters  
 NAME qdy-40012-1 H  
 EXPNO 2  
 PROCNO 1

F2 - Acquisition Parameters  
 Date\_ 20161216  
 Time 17.20  
 INSTRUM spect  
 PROBHD 5 mm PABBO BB/  
 PULPROG zg30  
 TD 65536  
 SOLVENT CDC13  
 NS 4  
 DS 0  
 SWH 8012.820 Hz  
 FIDRES 0.122266 Hz  
 AQ 4.0894465 sec  
 RG 103.52  
 DW 62.400 usec  
 DE 6.50 usec  
 TE 294.6 K  
 D1 1.00000000 sec  
 TD0 1

==== CHANNEL f1 =====  
 SFO1 400.1324710 MHz  
 NUC1 1H  
 P1 14.50 usec  
 PLW1 11.99499989 W

F2 - Processing parameters  
 SI 65536  
 SF 400.1300092 MHz  
 WDW EM  
 SSB 0  
 LB 0.30 Hz  
 GB 0  
 PC 1.00

Supplementary Figure 13. <sup>1</sup>H NMR spectrum for 1g

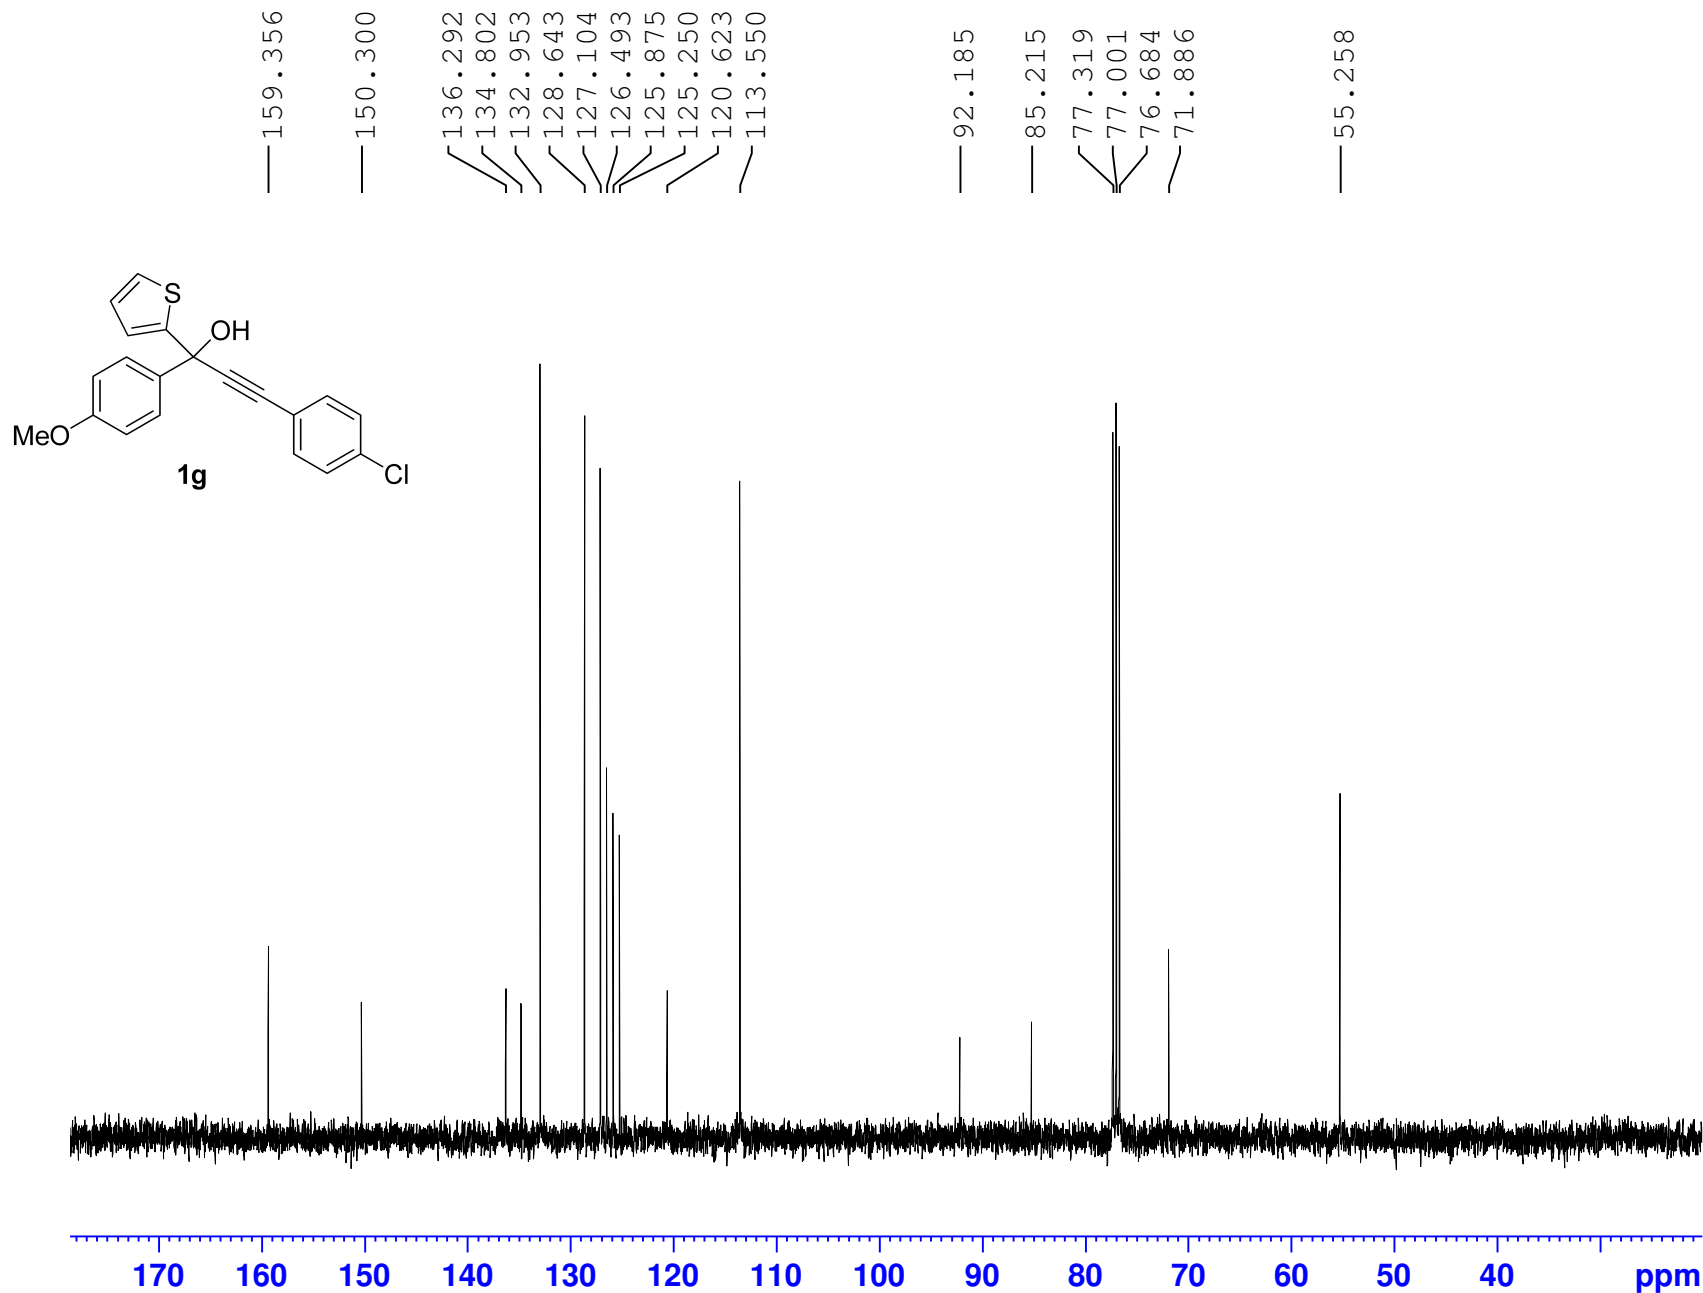

Current Data Parameters  
 NAME qdy-40012-1 C  
 EXPNO 1  
 PROCNO 1

F2 - Acquisition Parameters  
 Date\_ 20161214  
 Time 21.57  
 INSTRUM spect  
 PROBHD 5 mm DUL 13C-1  
 PULPROG zgpg30  
 TD 65536  
 SOLVENT CDC13  
 NS 46  
 DS 0  
 SWH 24038.461 Hz  
 FIDRES 0.366798 Hz  
 AQ 1.3631488 sec  
 RG 196.92  
 DW 20.800 usec  
 DE 6.50 usec  
 TE 297.1 K  
 D1 2.00000000 sec  
 D11 0.03000000 sec  
 TD0 1

==== CHANNEL f1 =====  
 SFO1 100.6228298 MHz  
 NUC1 13C  
 P1 9.60 usec  
 PLW1 31.98900032 W

==== CHANNEL f2 =====  
 SFO2 400.1316005 MHz  
 NUC2 1H  
 CPDPRG[2] waltz16  
 PCPD2 90.00 usec  
 PLW2 9.10000038 W  
 PLW12 0.24608000 W  
 PLW13 0.19933000 W

F2 - Processing parameters  
 SI 32768  
 SF 100.6127780 MHz  
 WDW EM  
 SSB 0  
 LB 1.00 Hz  
 GB 0  
 PC 1.40

Supplementary Figure 14. <sup>13</sup>C NMR spectrum for **1g**

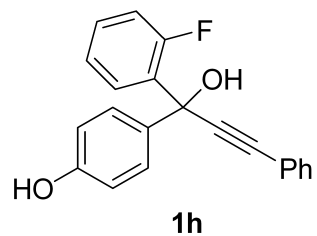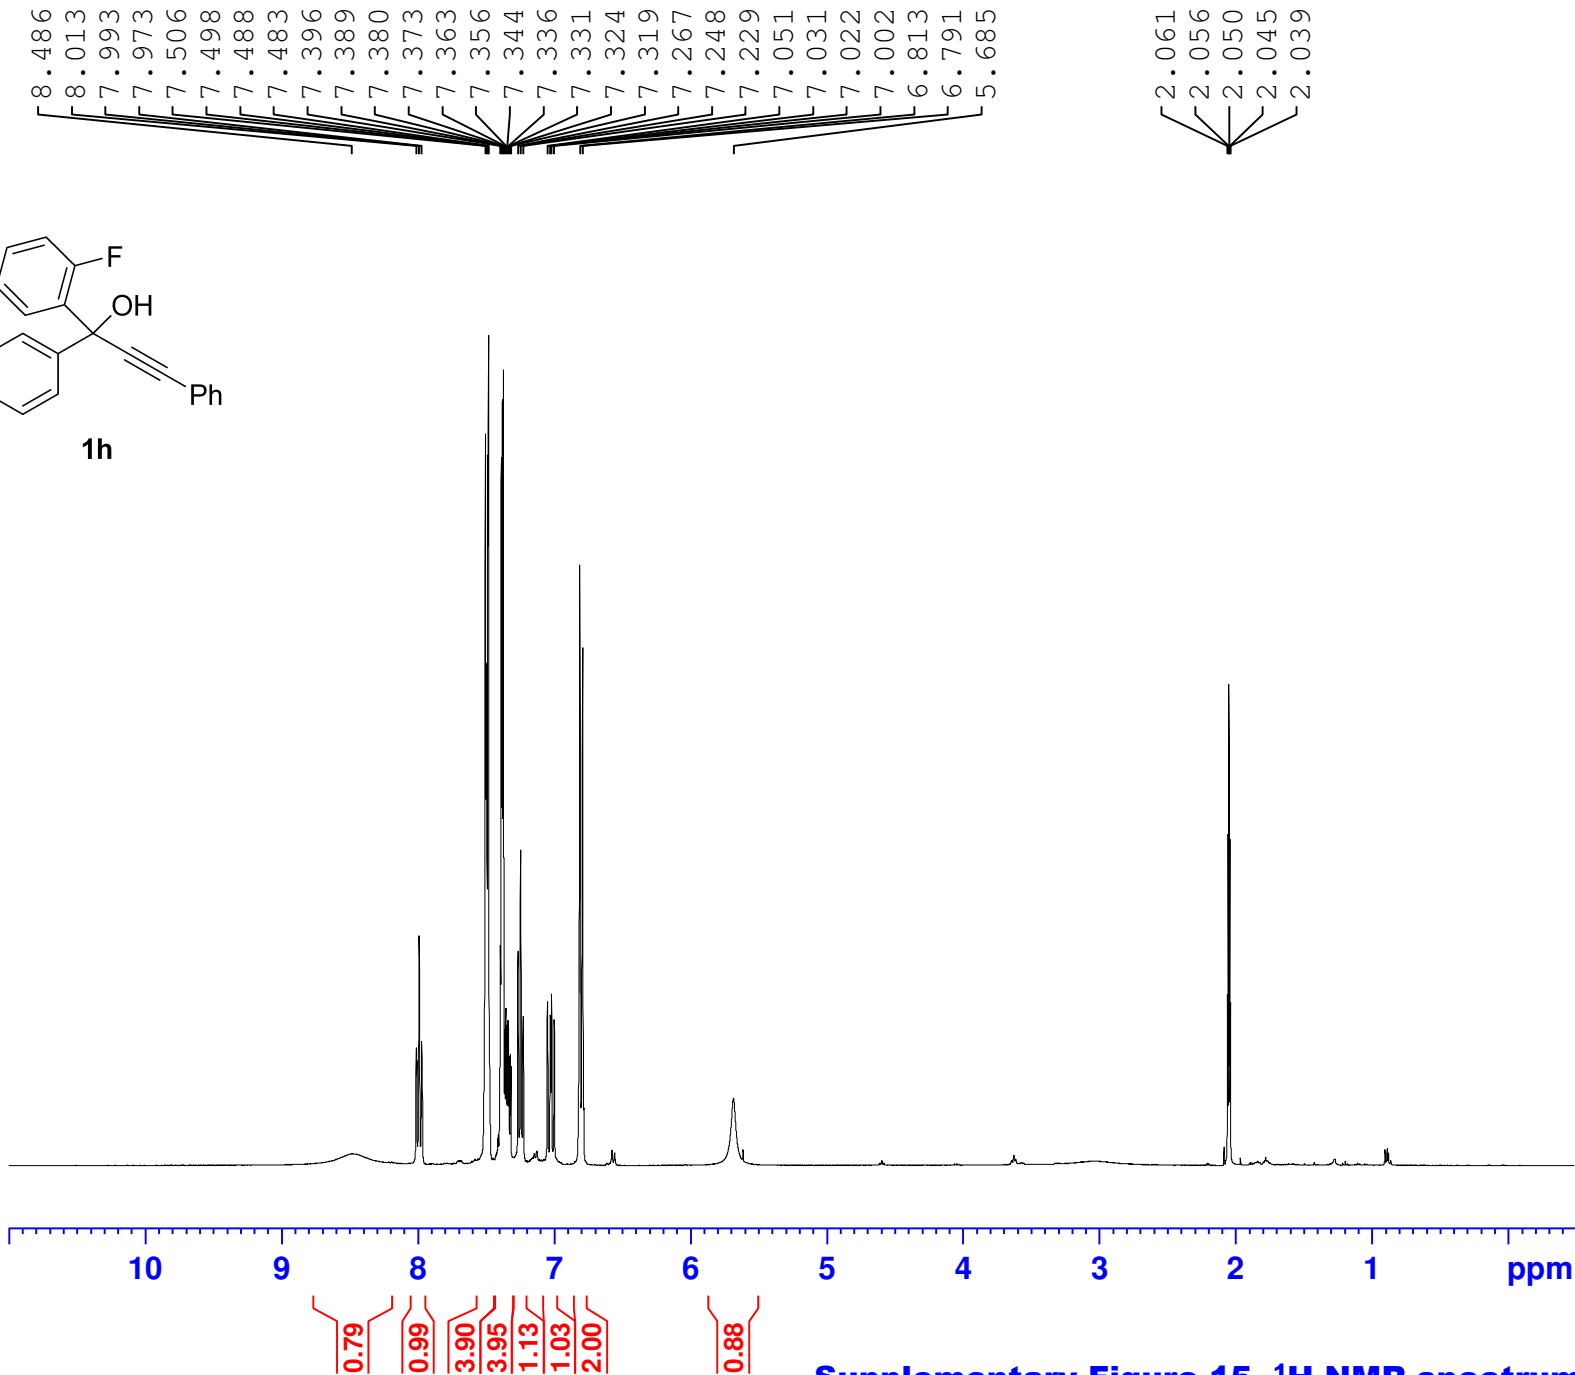

Current Data Parameters  
 NAME qdy-20089 H  
 EXPNO 1  
 PROCNO 1

F2 - Acquisition Parameters  
 Date\_ 20160324  
 Time 19.47  
 INSTRUM spect  
 PROBHD 5 mm PABBO BB/  
 PULPROG zg30  
 TD 65536  
 SOLVENT Acetone  
 NS 16  
 DS 0  
 SWH 8012.820 Hz  
 FIDRES 0.122266 Hz  
 AQ 4.0894465 sec  
 RG 70.97  
 DW 62.400 usec  
 DE 6.50 usec  
 TE 296.6 K  
 D1 1.00000000 sec  
 TD0 1

==== CHANNEL f1 =====  
 SFO1 400.1324710 MHz  
 NUC1 1H  
 P1 14.50 usec  
 PLW1 11.99499989 W

F2 - Processing parameters  
 SI 65536  
 SF 400.1300067 MHz  
 WDW EM  
 SSB 0  
 LB 0.30 Hz  
 GB 0  
 PC 1.00

Supplementary Figure 15. <sup>1</sup>H NMR spectrum for 1h

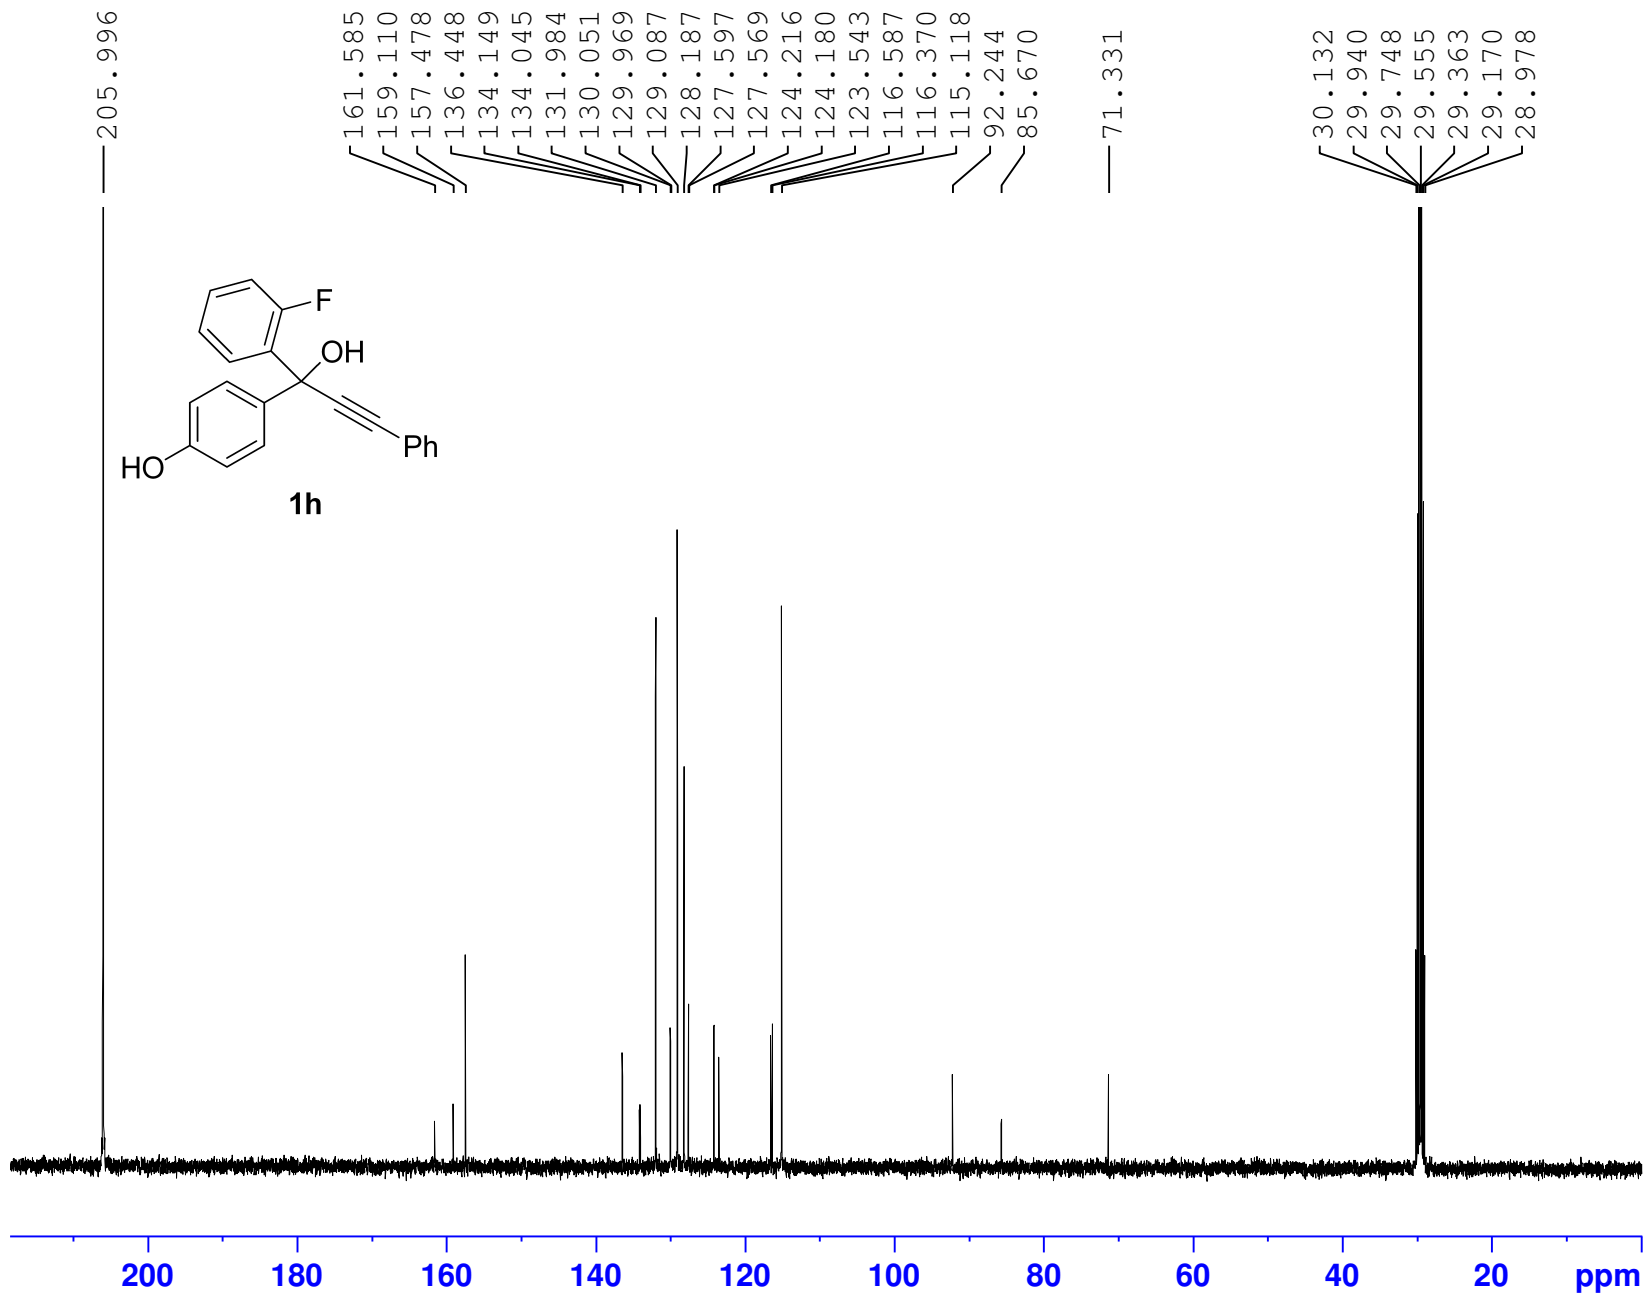

Current Data Parameters  
 NAME qdy-20089 C  
 EXPNO 1  
 PROCNO 1

F2 - Acquisition Parameters  
 Date\_ 20160324  
 Time 19.56  
 INSTRUM spect  
 PROBHD 5 mm PABBO BB/  
 PULPROG zgpg30  
 TD 65536  
 SOLVENT Acetone  
 NS 206  
 DS 0  
 SWH 24038.461 Hz  
 FIDRES 0.366798 Hz  
 AQ 1.3631488 sec  
 RG 196.92  
 DW 20.800 usec  
 DE 6.50 usec  
 TE 297.5 K  
 D1 2.00000000 sec  
 D11 0.03000000 sec  
 TD0 1

==== CHANNEL f1 =====  
 SFO1 100.6228298 MHz  
 NUC1 13C  
 P1 9.70 usec  
 PLW1 46.98899841 W

==== CHANNEL f2 =====  
 SFO2 400.1316005 MHz  
 NUC2 1H  
 CPDPRG[2] waltz16  
 PCPD2 90.00 usec  
 PLW2 11.99499989 W  
 PLW12 0.34213999 W  
 PLW13 0.27713001 W

F2 - Processing parameters  
 SI 32768  
 SF 100.6127115 MHz  
 WDW EM  
 SSB 0  
 LB 1.00 Hz  
 GB 0  
 PC 1.40

Supplementary Figure 16. <sup>13</sup>C NMR spectrum for 1h

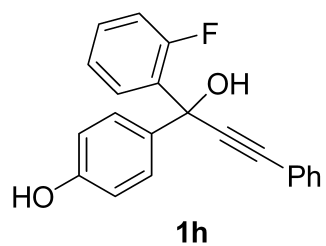

-111.09

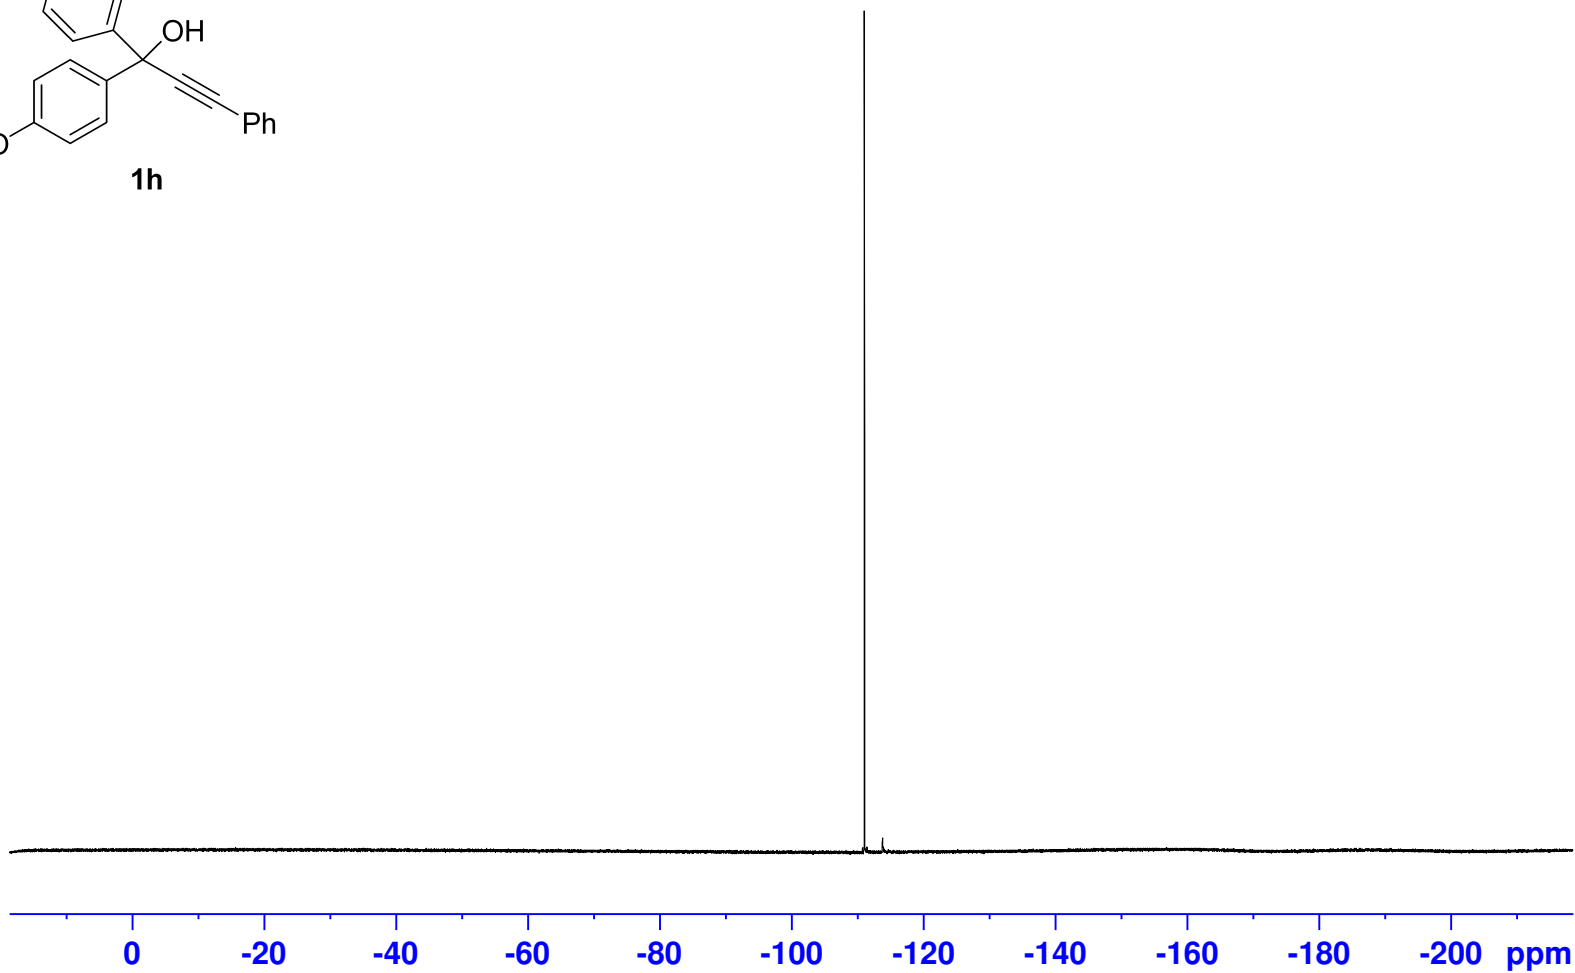

Current Data Parameters  
NAME qdy-20089 F  
EXPNO 1  
PROCNO 1

F2 - Acquisition Parameters  
Date\_ 20160324  
Time 19.49  
INSTRUM spect  
PROBHD 5 mm PABBO BB/  
PULPROG zgflqn  
TD 131072  
SOLVENT Acetone  
NS 16  
DS 0  
SWH 89285.711 Hz  
FIDRES 0.681196 Hz  
AQ 0.7340032 sec  
RG 196.92  
DW 5.600 usec  
DE 6.50 usec  
TE 296.5 K  
D1 1.00000000 sec  
TD0 1

==== CHANNEL f1 =====  
SFO1 376.4607164 MHz  
NUC1 19F  
P1 14.70 usec  
PLW1 15.99600029 W

F2 - Processing parameters  
SI 65536  
SF 376.4983660 MHz  
WDW EM  
SSB 0  
LB 0.30 Hz  
GB 0  
PC 1.00

**Supplementary Figure 17. <sup>19</sup>F NMR spectrum for 1h**

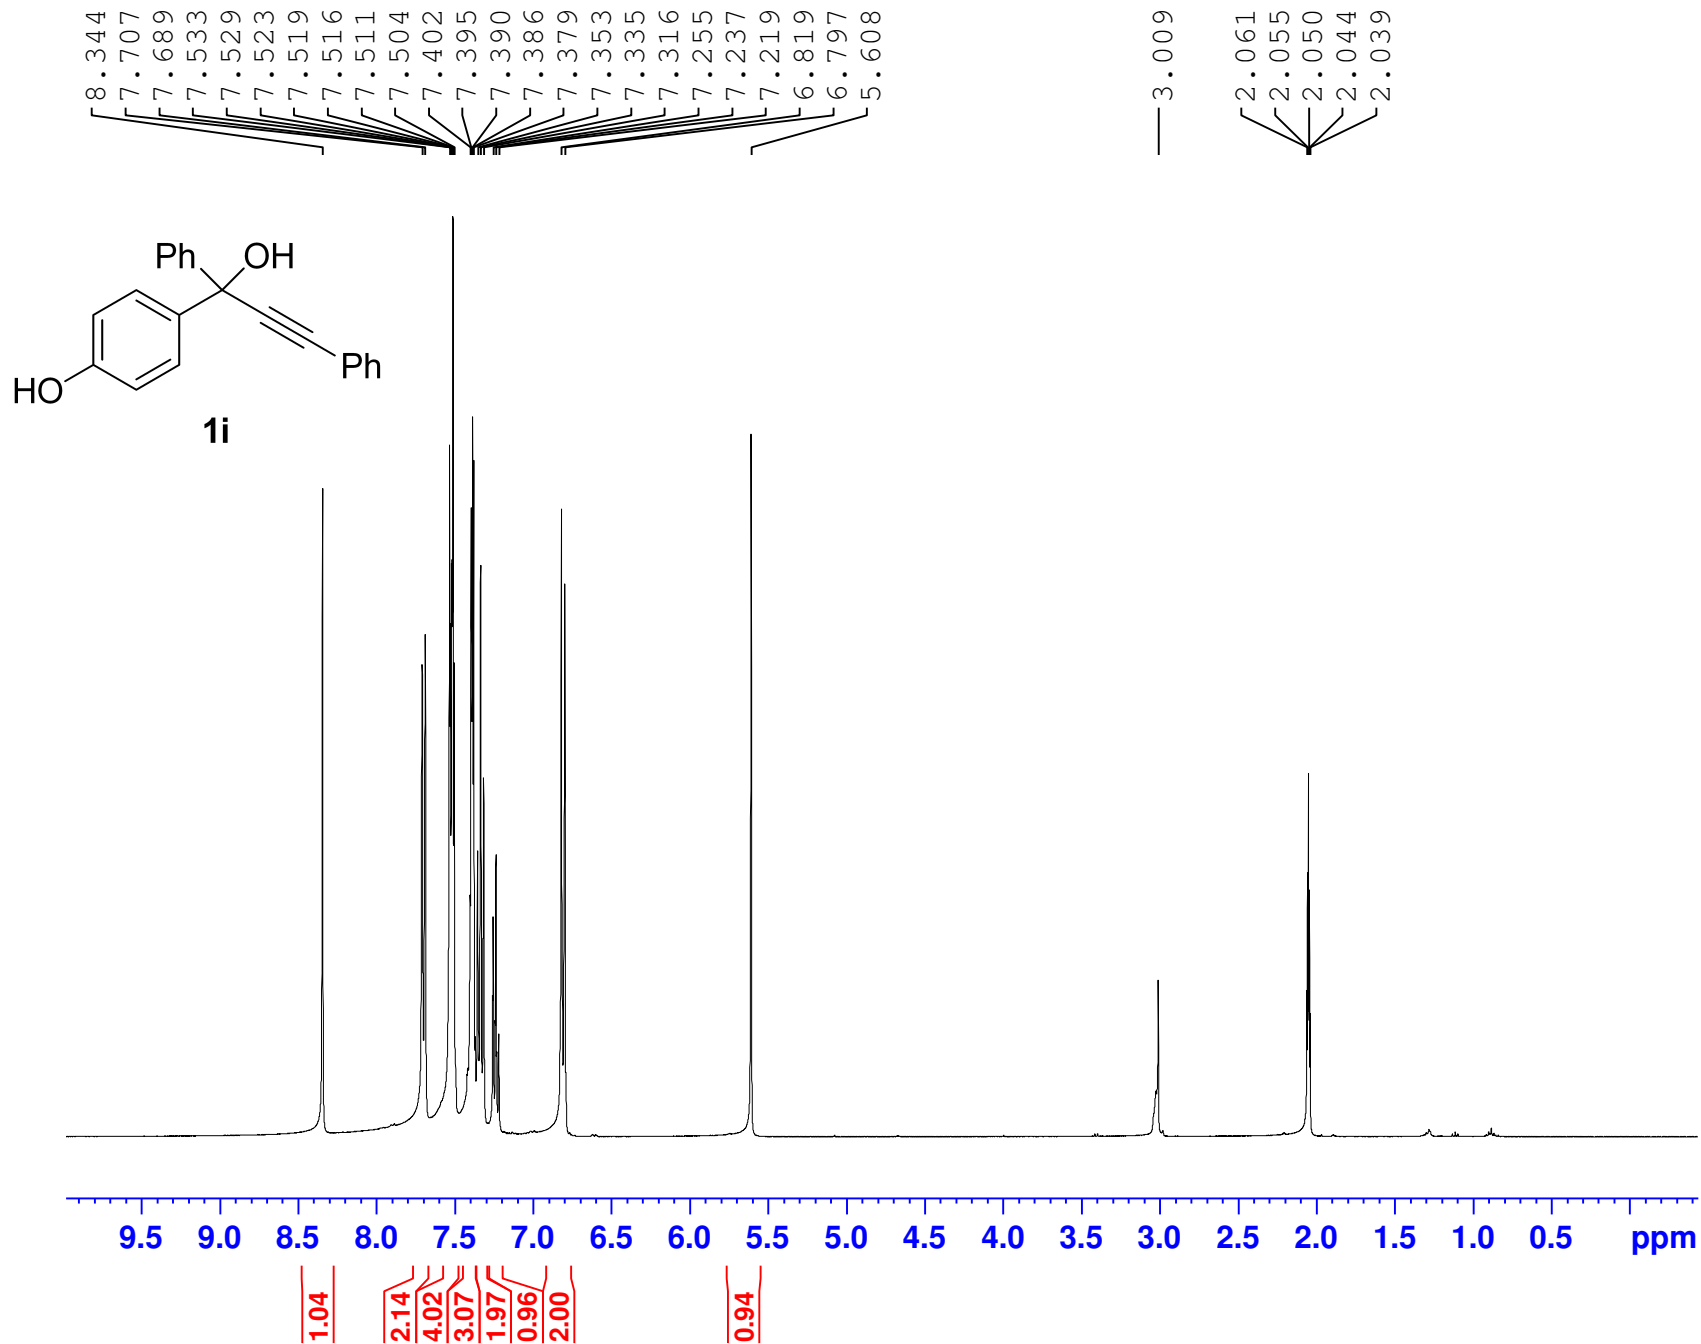

Current Data Parameters  
 NAME qdy-10149 H  
 EXPNO 1  
 PROCNO 1

F2 - Acquisition Parameters  
 Date\_ 20160328  
 Time 16.00  
 INSTRUM spect  
 PROBHD 5 mm PABBO BB/  
 PULPROG zg30  
 TD 65536  
 SOLVENT Acetone  
 NS 7  
 DS 0  
 SWH 8012.820 Hz  
 FIDRES 0.122266 Hz  
 AQ 4.0894465 sec  
 RG 62.93  
 DW 62.400 usec  
 DE 6.50 usec  
 TE 296.4 K  
 D1 1.00000000 sec  
 TD0 1

==== CHANNEL f1 =====  
 SFO1 400.1324710 MHz  
 NUC1 1H  
 P1 14.50 usec  
 PLW1 11.99499989 W

F2 - Processing parameters  
 SI 65536  
 SF 400.1300067 MHz  
 WDW EM  
 SSB 0  
 LB 0.30 Hz  
 GB 0  
 PC 1.00

**Supplementary Figure 18. <sup>1</sup>H NMR spectrum for 1i**

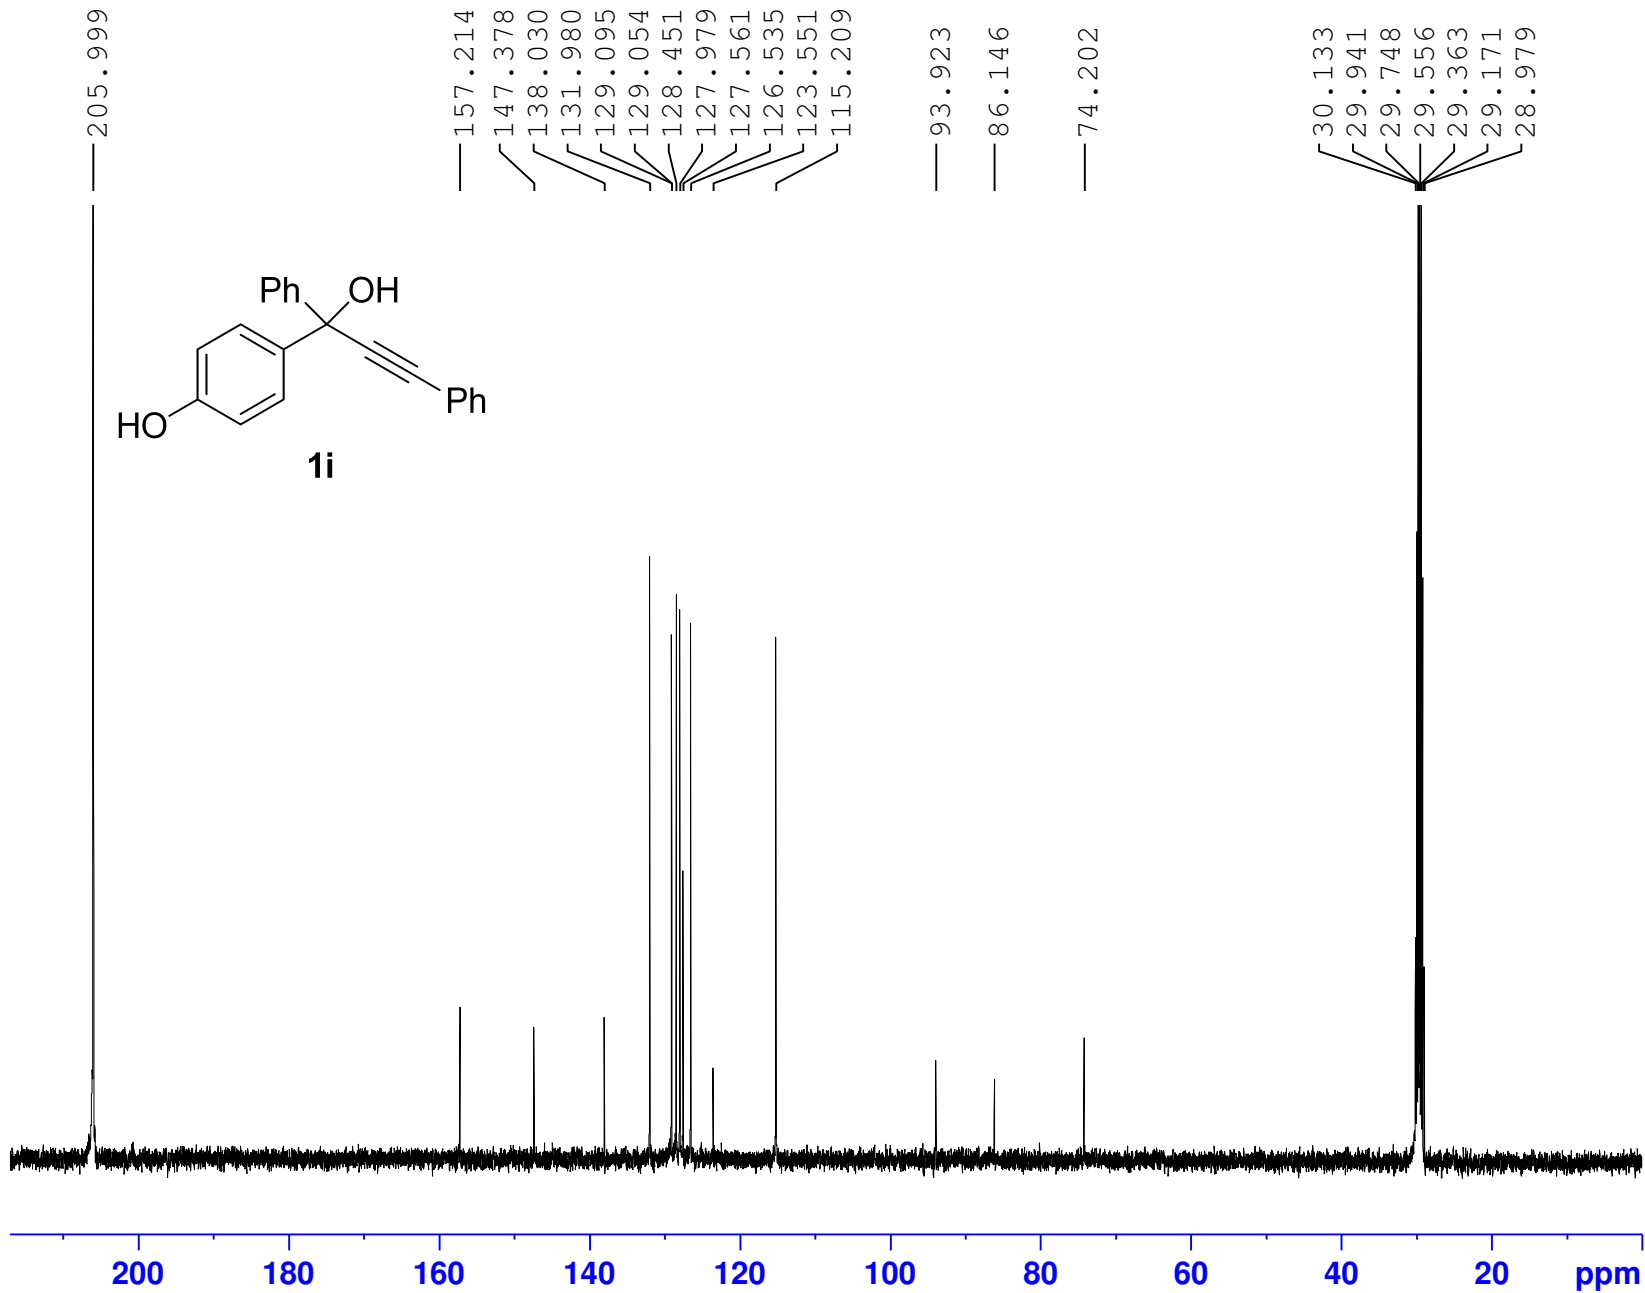

Current Data Parameters  
 NAME qdy-10149 C  
 EXPNO 1  
 PROCNO 1

F2 - Acquisition Parameters  
 Date\_ 20160328  
 Time 16.04  
 INSTRUM spect  
 PROBHD 5 mm PABBO BB/  
 PULPROG zgpg30  
 TD 65536  
 SOLVENT Acetone  
 NS 78  
 DS 0  
 SWH 24038.461 Hz  
 FIDRES 0.366798 Hz  
 AQ 1.3631488 sec  
 RG 196.92  
 DW 20.800 usec  
 DE 6.50 usec  
 TE 297.3 K  
 D1 2.00000000 sec  
 D11 0.03000000 sec  
 TD0 1

==== CHANNEL f1 =====  
 SFO1 100.6228298 MHz  
 NUC1 13C  
 P1 9.70 usec  
 PLW1 46.98899841 W

==== CHANNEL f2 =====  
 SFO2 400.1316005 MHz  
 NUC2 1H  
 CPDPRG[2] waltz16  
 PCPD2 90.00 usec  
 PLW2 11.99499989 W  
 PLW12 0.34213999 W  
 PLW13 0.27713001 W

F2 - Processing parameters  
 SI 32768  
 SF 100.6127125 MHz  
 WDW EM  
 SSB 0  
 LB 1.00 Hz  
 GB 0  
 PC 1.40

Supplementary Figure 19. <sup>13</sup>C NMR spectrum for 1i



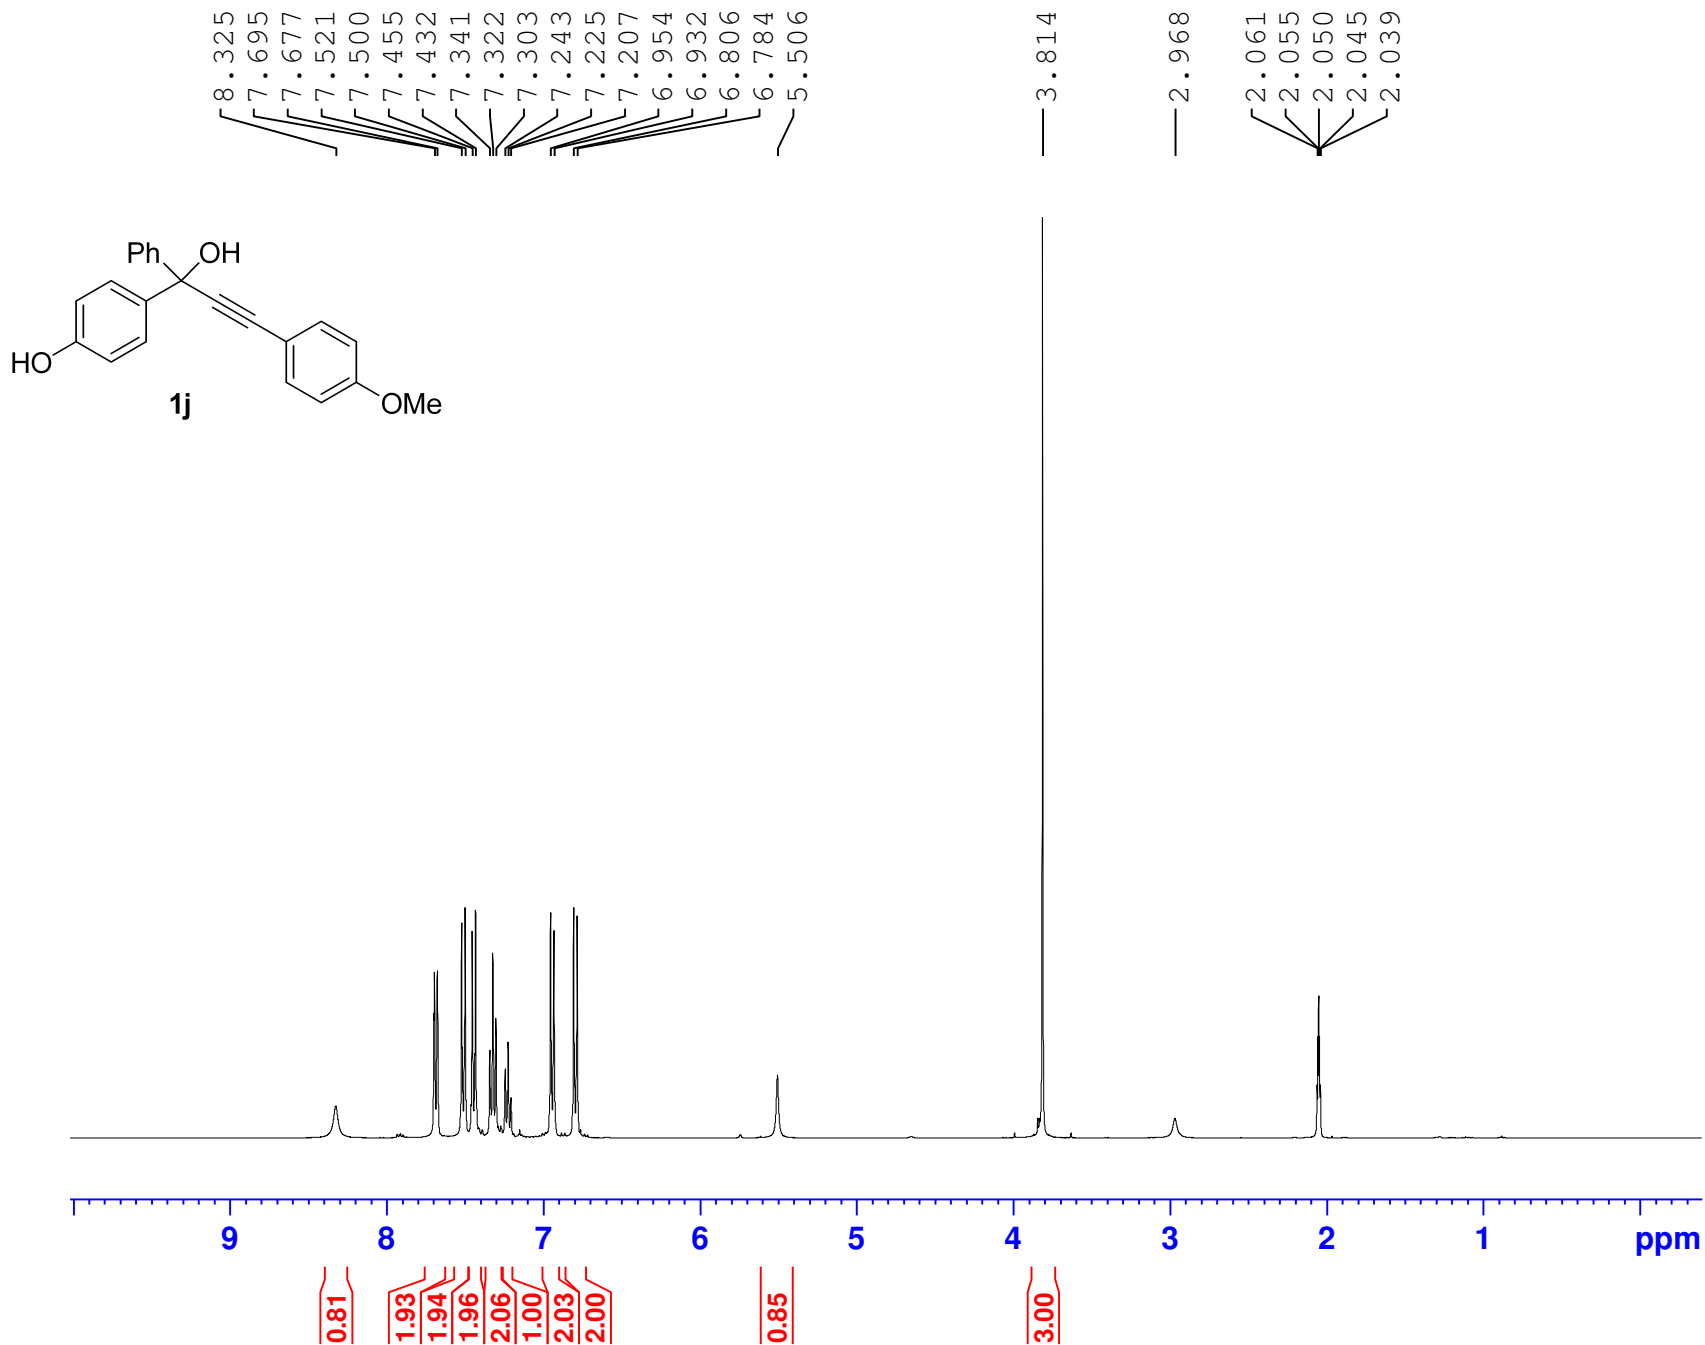

Current Data Parameters  
 NAME qdy-10181 H  
 EXPNO 1  
 PROCNO 1

F2 - Acquisition Parameters  
 Date\_ 20160328  
 Time 16.16  
 INSTRUM spect  
 PROBHD 5 mm PABBO BB/  
 PULPROG zg30  
 TD 65536  
 SOLVENT Acetone  
 NS 5  
 DS 0  
 SWH 8012.820 Hz  
 FIDRES 0.122266 Hz  
 AQ 4.0894465 sec  
 RG 70.97  
 DW 62.400 usec  
 DE 6.50 usec  
 TE 296.9 K  
 D1 1.00000000 sec  
 TD0 1

===== CHANNEL f1 =====  
 SFO1 400.1324710 MHz  
 NUC1 1H  
 P1 14.50 usec  
 PLW1 11.99499989 W

F2 - Processing parameters  
 SI 65536  
 SF 400.1300067 MHz  
 WDW EM  
 SSB 0  
 LB 0.30 Hz  
 GB 0  
 PC 1.00

Supplementary Figure 20. <sup>1</sup>H NMR spectrum for **1j**

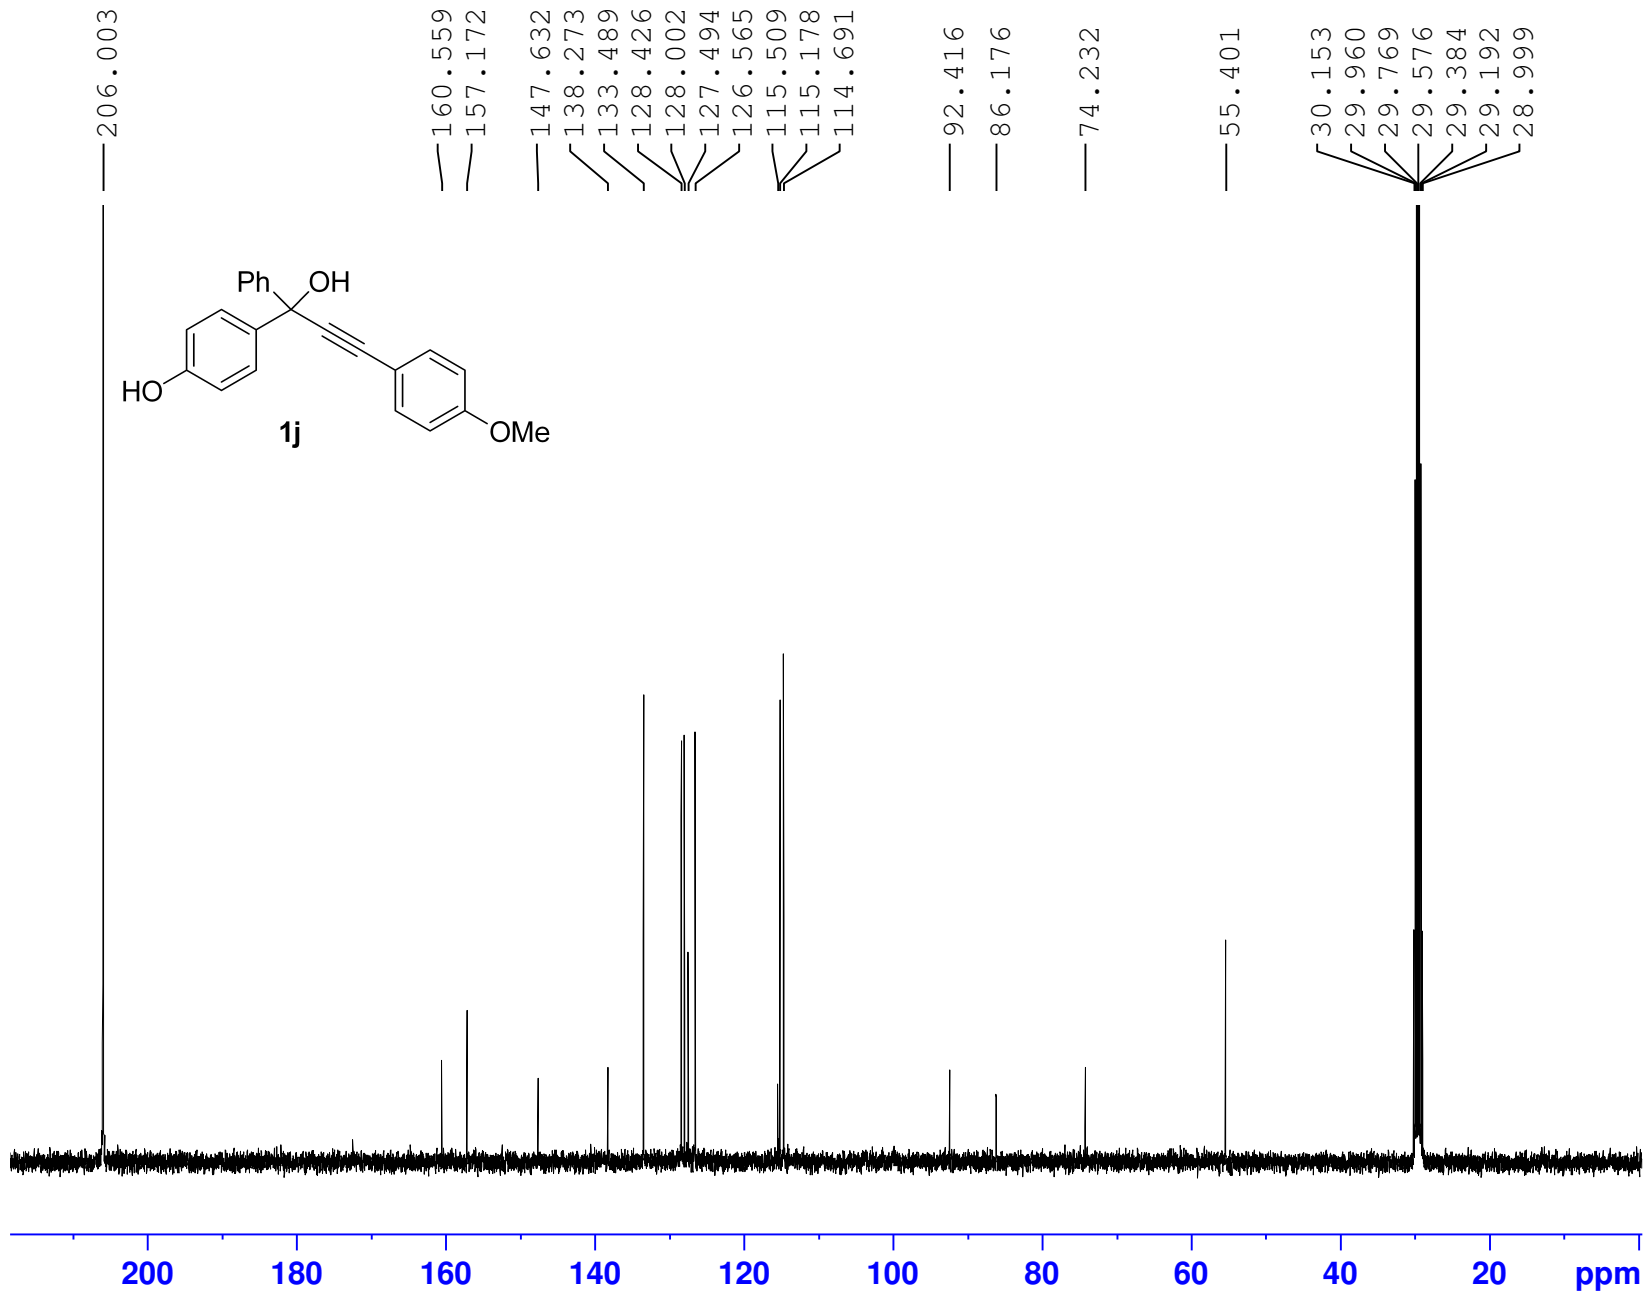

Current Data Parameters  
 NAME qdy-10181 C  
 EXPNO 1  
 PROCNO 1

F2 - Acquisition Parameters  
 Date\_ 20160328  
 Time 16.10  
 INSTRUM spect  
 PROBHD 5 mm PABBO BB/  
 PULPROG zgpg30  
 TD 65536  
 SOLVENT Acetone  
 NS 50  
 DS 0  
 SWH 24038.461 Hz  
 FIDRES 0.366798 Hz  
 AQ 1.3631488 sec  
 RG 196.92  
 DW 20.800 usec  
 DE 6.50 usec  
 TE 297.0 K  
 D1 2.00000000 sec  
 D11 0.03000000 sec  
 TD0 1

==== CHANNEL f1 =====  
 SFO1 100.6228298 MHz  
 NUC1 13C  
 P1 9.70 usec  
 PLW1 46.98899841 W

==== CHANNEL f2 =====  
 SFO2 400.1316005 MHz  
 NUC2 1H  
 CPDPRG[2] waltz16  
 PCPD2 90.00 usec  
 PLW2 11.99499989 W  
 PLW12 0.34213999 W  
 PLW13 0.27713001 W

F2 - Processing parameters  
 SI 32768  
 SF 100.6127095 MHz  
 WDW EM  
 SSB 0  
 LB 1.00 Hz  
 GB 0  
 PC 1.40

Supplementary Figure 21. <sup>13</sup>C NMR spectrum for **1j**

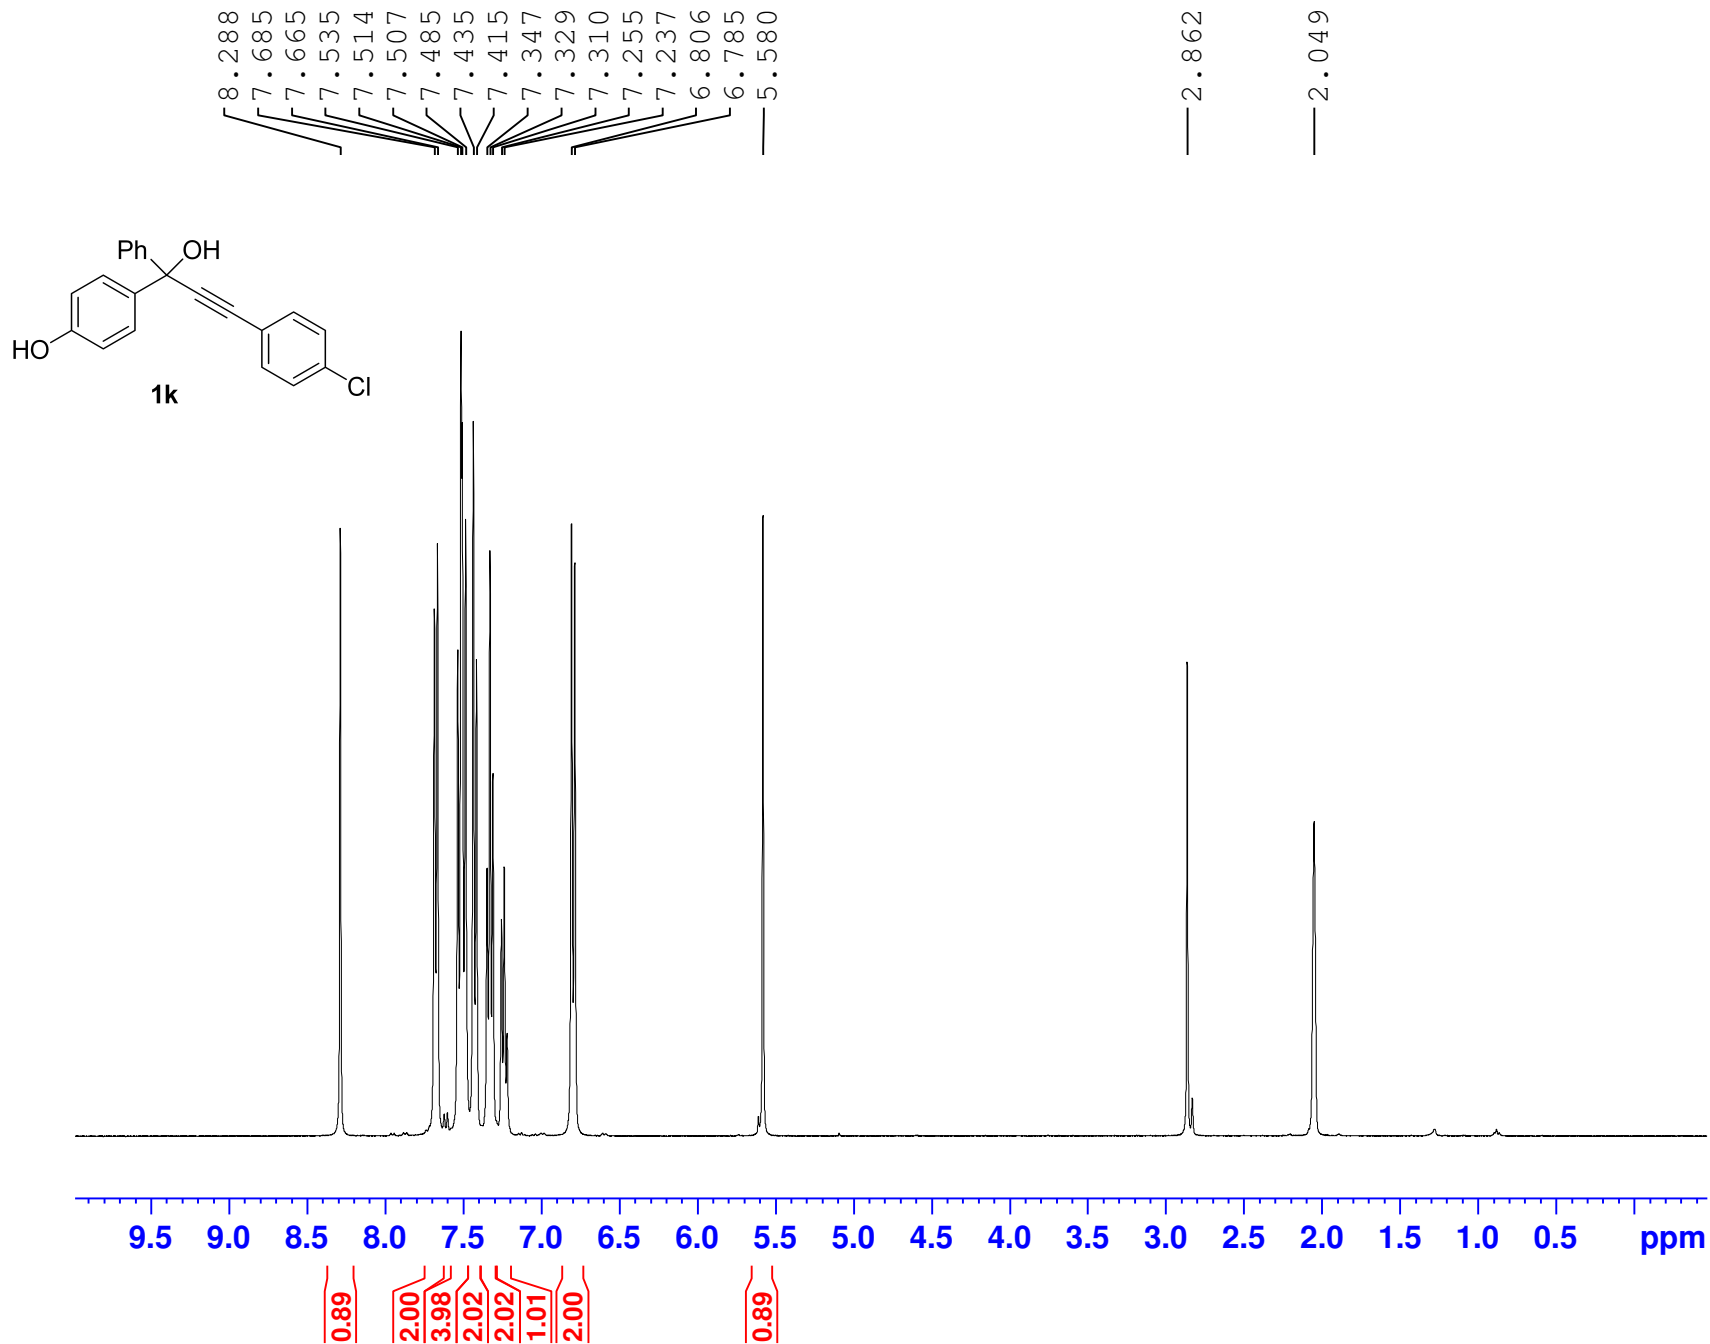

Current Data Parameters  
 NAME qdy-20025 H  
 EXPNO 1  
 PROCNO 1

F2 - Acquisition Parameters  
 Date\_ 20160120  
 Time 19.53  
 INSTRUM spect  
 PROBHD 5 mm PABBO BB/  
 PULPROG zg30  
 TD 65536  
 SOLVENT Acetone  
 NS 13  
 DS 0  
 SWH 8012.820 Hz  
 FIDRES 0.122266 Hz  
 AQ 4.0894465 sec  
 RG 126.97  
 DW 62.400 usec  
 DE 6.50 usec  
 TE 303.2 K  
 D1 1.00000000 sec  
 TD0 1

==== CHANNEL f1 =====  
 SFO1 400.1324710 MHz  
 NUC1 1H  
 P1 14.50 usec  
 PLW1 11.99499989 W

F2 - Processing parameters  
 SI 65536  
 SF 400.1300064 MHz  
 WDW EM  
 SSB 0  
 LB 0.30 Hz  
 GB 0  
 PC 1.00

Supplementary Figure 22. <sup>1</sup>H NMR spectrum for 1k

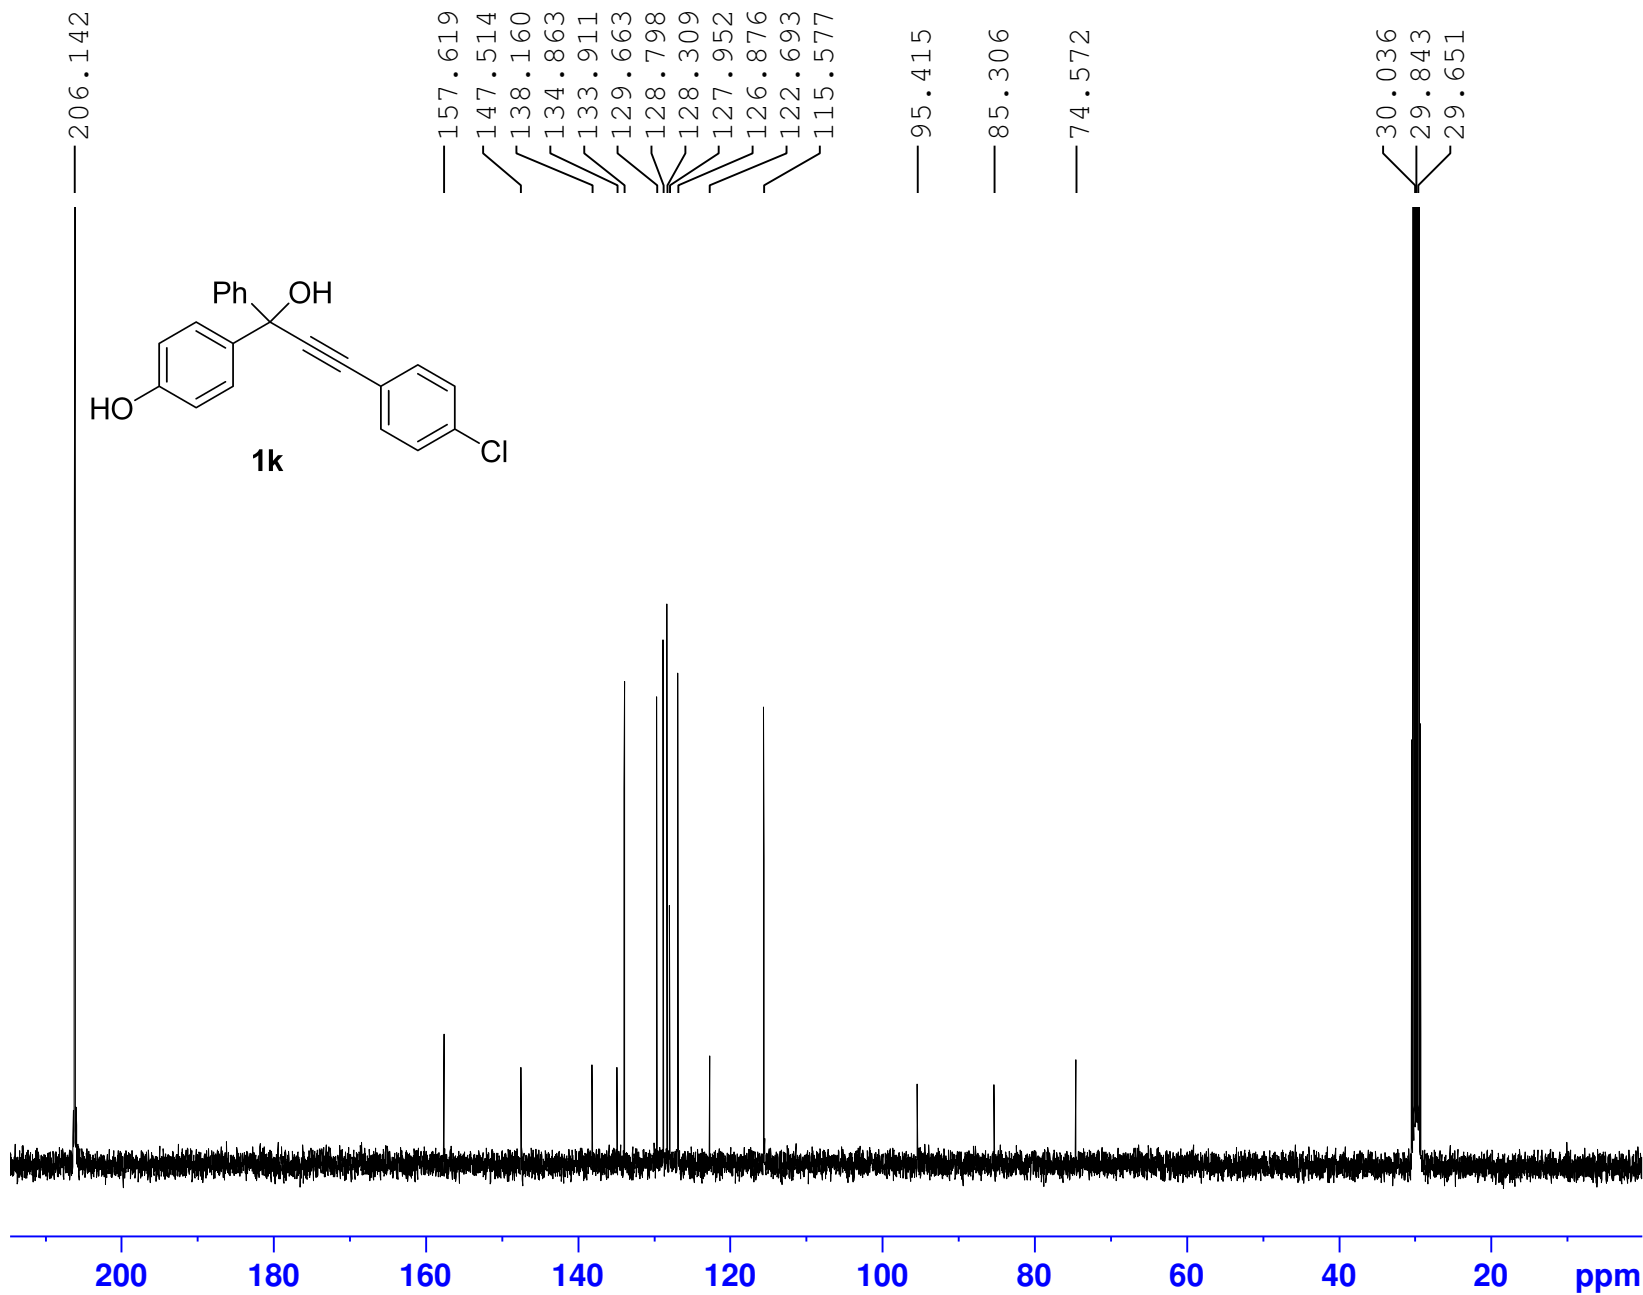

Current Data Parameters  
 NAME qdy-20025 C  
 EXPNO 1  
 PROCNO 1

F2 - Acquisition Parameters  
 Date\_ 20160120  
 Time 19.58  
 INSTRUM spect  
 PROBHD 5 mm PABBO BB/  
 PULPROG zgpg30  
 TD 65536  
 SOLVENT Acetone  
 NS 101  
 DS 2  
 SWH 24038.461 Hz  
 FIDRES 0.366798 Hz  
 AQ 1.3631488 sec  
 RG 196.92  
 DW 20.800 usec  
 DE 6.50 usec  
 TE 303.5 K  
 D1 2.00000000 sec  
 D11 0.03000000 sec  
 TD0 1

==== CHANNEL f1 =====  
 SFO1 100.6228298 MHz  
 NUC1 13C  
 P1 9.70 usec  
 PLW1 46.98899841 W

==== CHANNEL f2 =====  
 SFO2 400.1316005 MHz  
 NUC2 1H  
 CPDPRG[2] waltz16  
 PCPD2 90.00 usec  
 PLW2 11.99499989 W  
 PLW12 0.34213999 W  
 PLW13 0.27713001 W

F2 - Processing parameters  
 SI 32768  
 SF 100.6126768 MHz  
 WDW EM  
 SSB 0  
 LB 1.00 Hz  
 GB 0  
 PC 1.40

Supplementary Figure 23. <sup>13</sup>C NMR spectrum for 1k

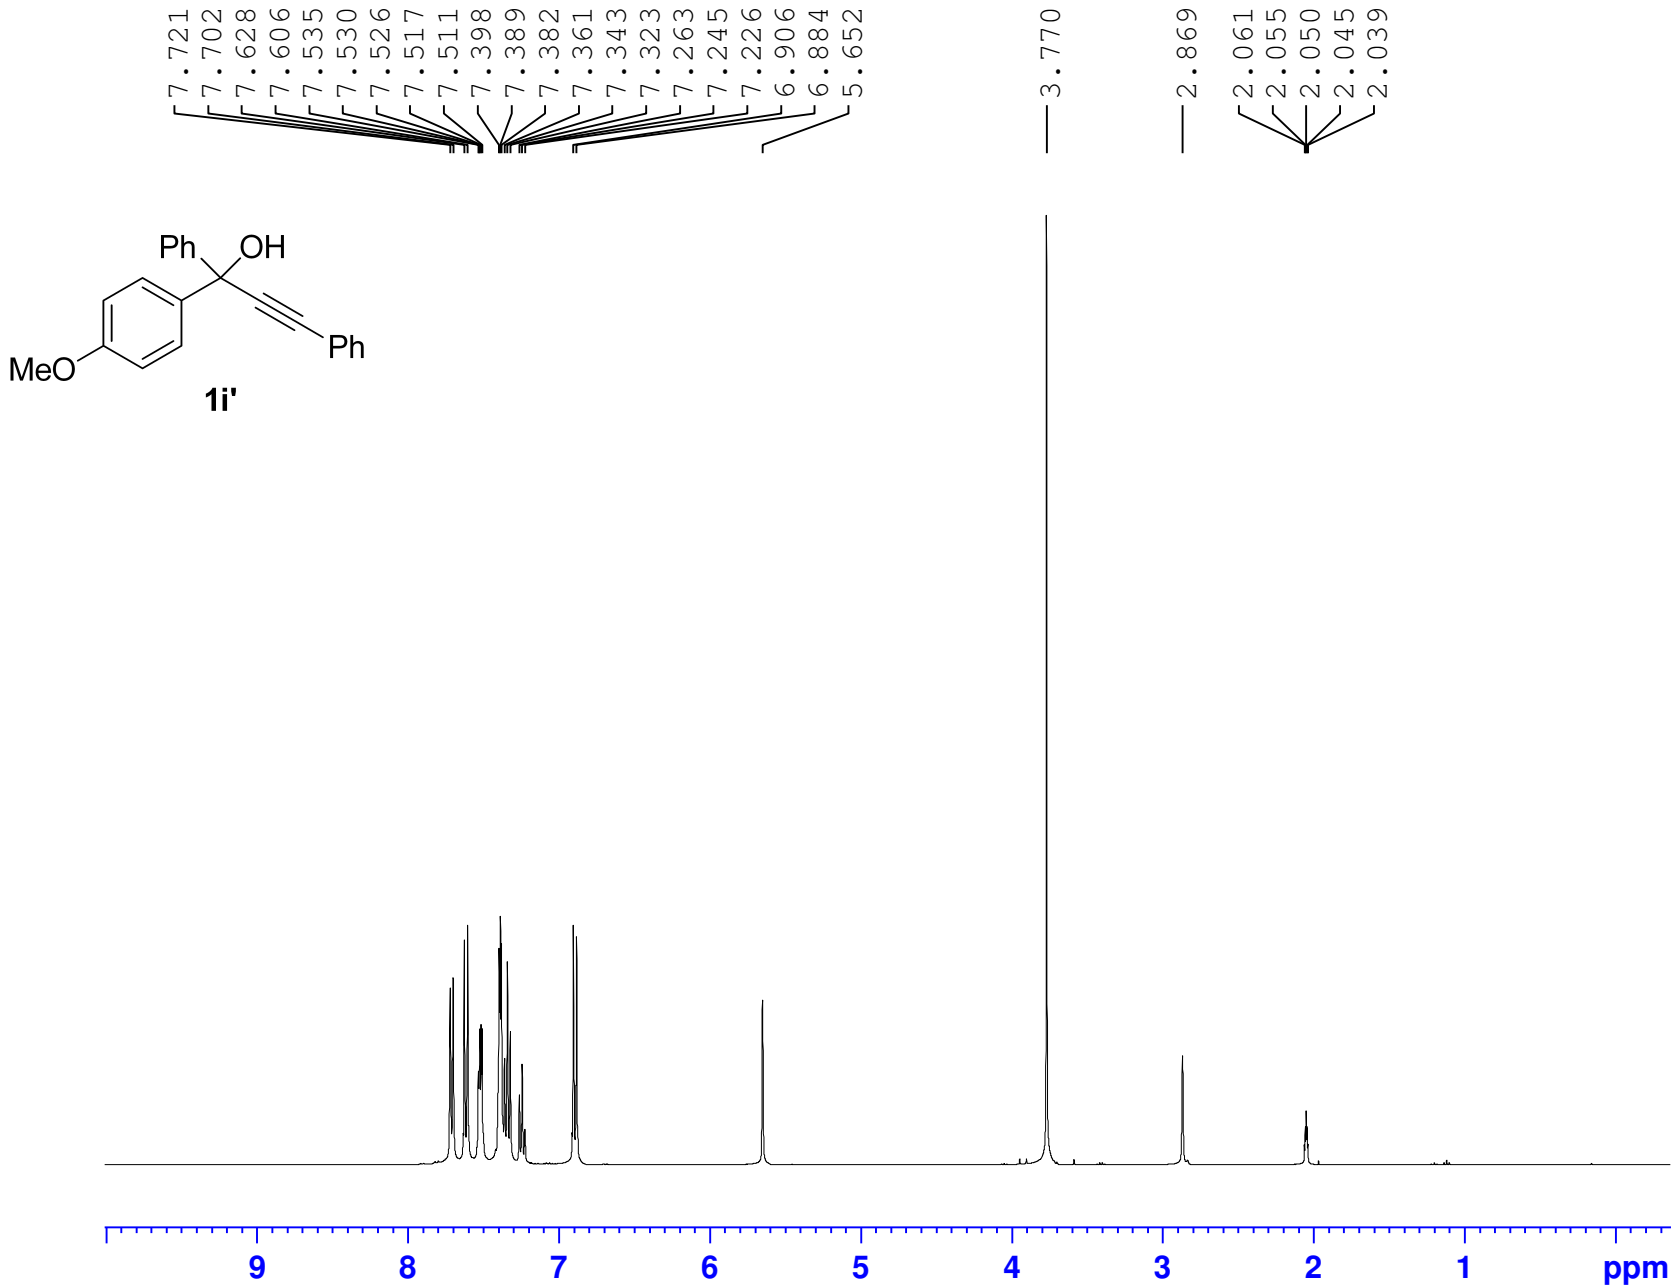

Current Data Parameters  
 NAME qdy-10173 H  
 EXPNO 1  
 PROCNO 1

F2 - Acquisition Parameters  
 Date\_ 20160529  
 Time 21.08  
 INSTRUM spect  
 PROBHD 5 mm PABBO BB/  
 PULPROG zg30  
 TD 65536  
 SOLVENT Acetone  
 NS 8  
 DS 0  
 SWH 8012.820 Hz  
 FIDRES 0.122266 Hz  
 AQ 4.0894465 sec  
 RG 31.55  
 DW 62.400 usec  
 DE 6.50 usec  
 TE 300.4 K  
 D1 1.00000000 sec  
 TD0 1

==== CHANNEL f1 =====  
 SFO1 400.1324710 MHz  
 NUC1 1H  
 P1 14.50 usec  
 PLW1 11.99499989 W

F2 - Processing parameters  
 SI 65536  
 SF 400.1300066 MHz  
 WDW EM  
 SSB 0  
 LB 0.30 Hz  
 GB 0  
 PC 1.00

**Supplementary Figure 24. <sup>1</sup>H NMR spectrum for 1i'**

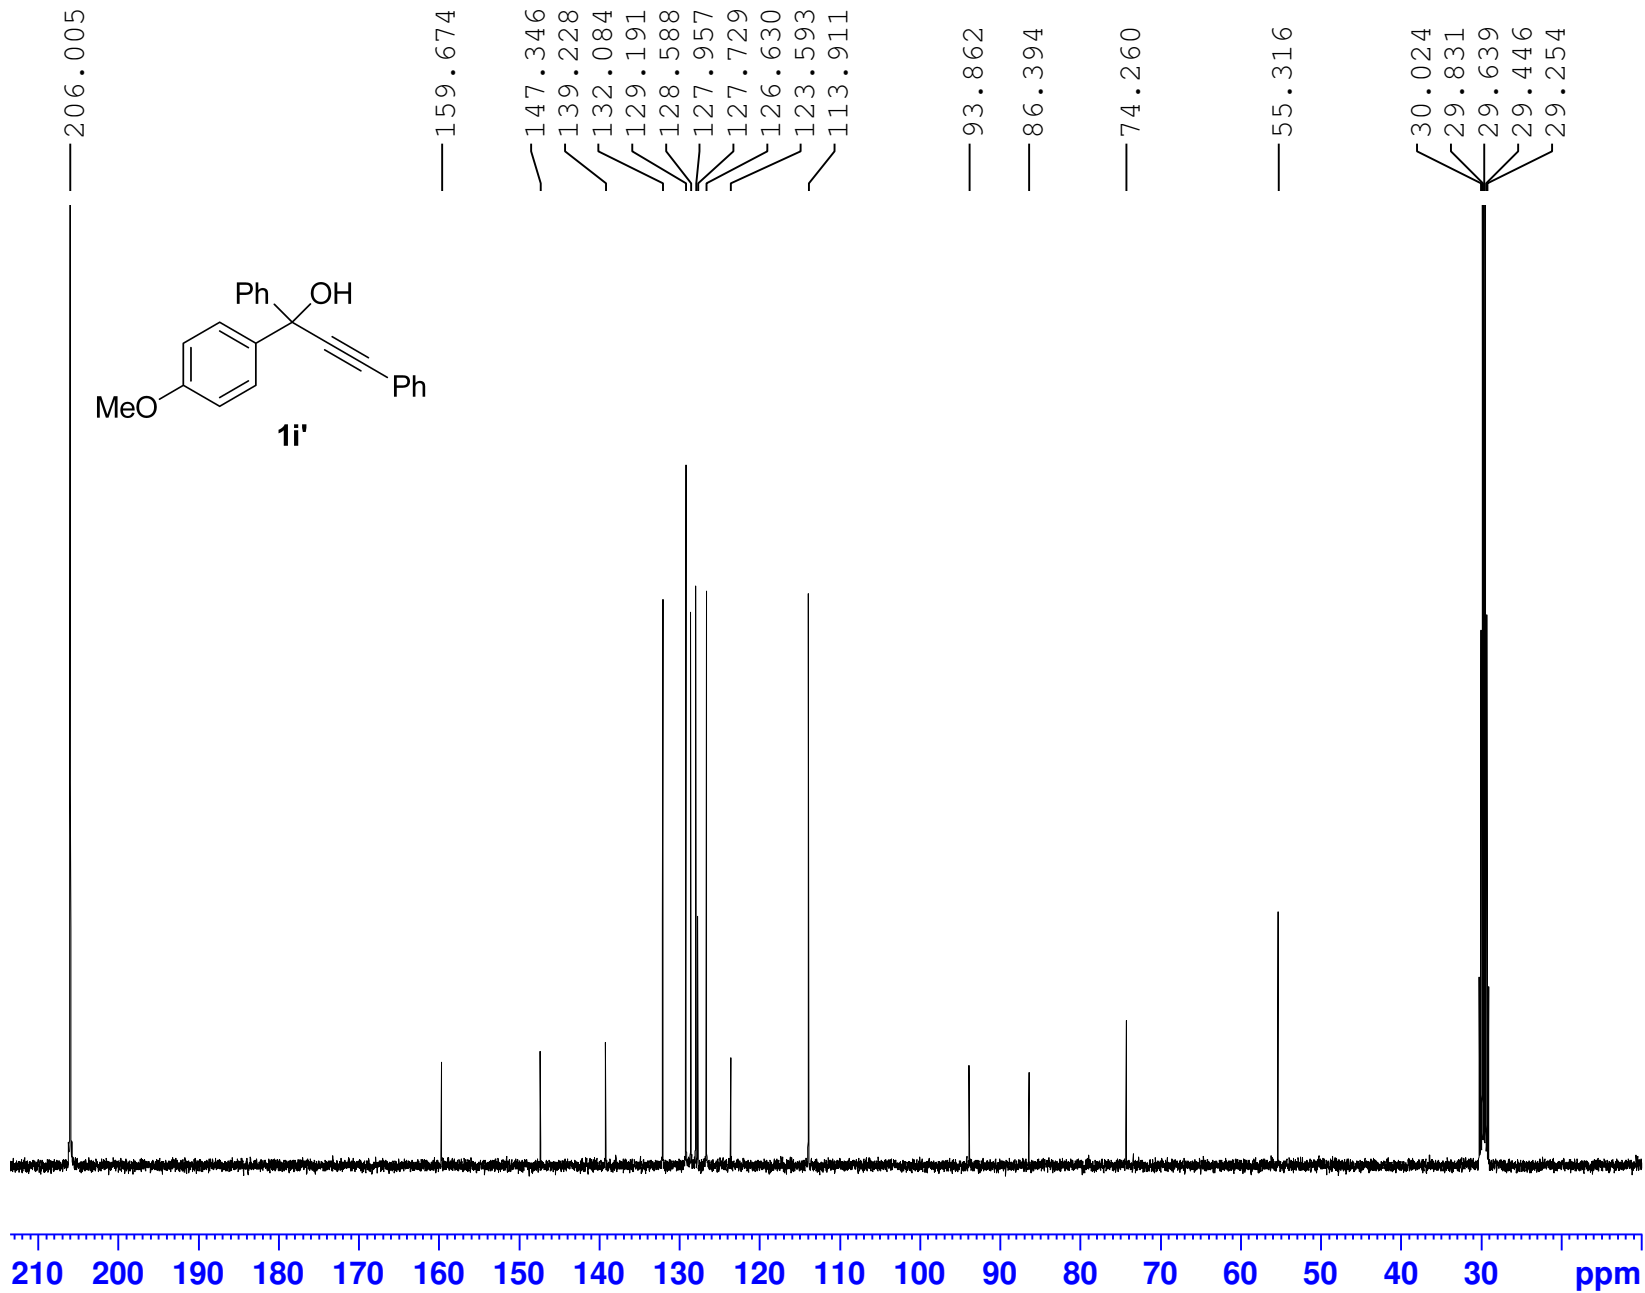

Current Data Parameters  
 NAME qdy-10173 C  
 EXPNO 1  
 PROCNO 1

F2 - Acquisition Parameters  
 Date\_ 20160529  
 Time 21.02  
 INSTRUM spect  
 PROBHD 5 mm PABBO BB/  
 PULPROG zgpg30  
 TD 65536  
 SOLVENT Acetone  
 NS 106  
 DS 0  
 SWH 24038.461 Hz  
 FIDRES 0.366798 Hz  
 AQ 1.3631488 sec  
 RG 196.92  
 DW 20.800 usec  
 DE 6.50 usec  
 TE 300.6 K  
 D1 2.00000000 sec  
 D11 0.03000000 sec  
 TD0 1

==== CHANNEL f1 =====  
 SFO1 100.6228298 MHz  
 NUC1 13C  
 P1 9.70 usec  
 PLW1 46.98899841 W

==== CHANNEL f2 =====  
 SFO2 400.1316005 MHz  
 NUC2 1H  
 CPDPRG[2] waltz16  
 PCPD2 90.00 usec  
 PLW2 11.99499989 W  
 PLW12 0.34213999 W  
 PLW13 0.27713001 W

F2 - Processing parameters  
 SI 32768  
 SF 100.6127034 MHz  
 WDW EM  
 SSB 0  
 LB 1.00 Hz  
 GB 0  
 PC 1.40

Supplementary Figure 25. <sup>13</sup>C NMR spectrum for **1i'**

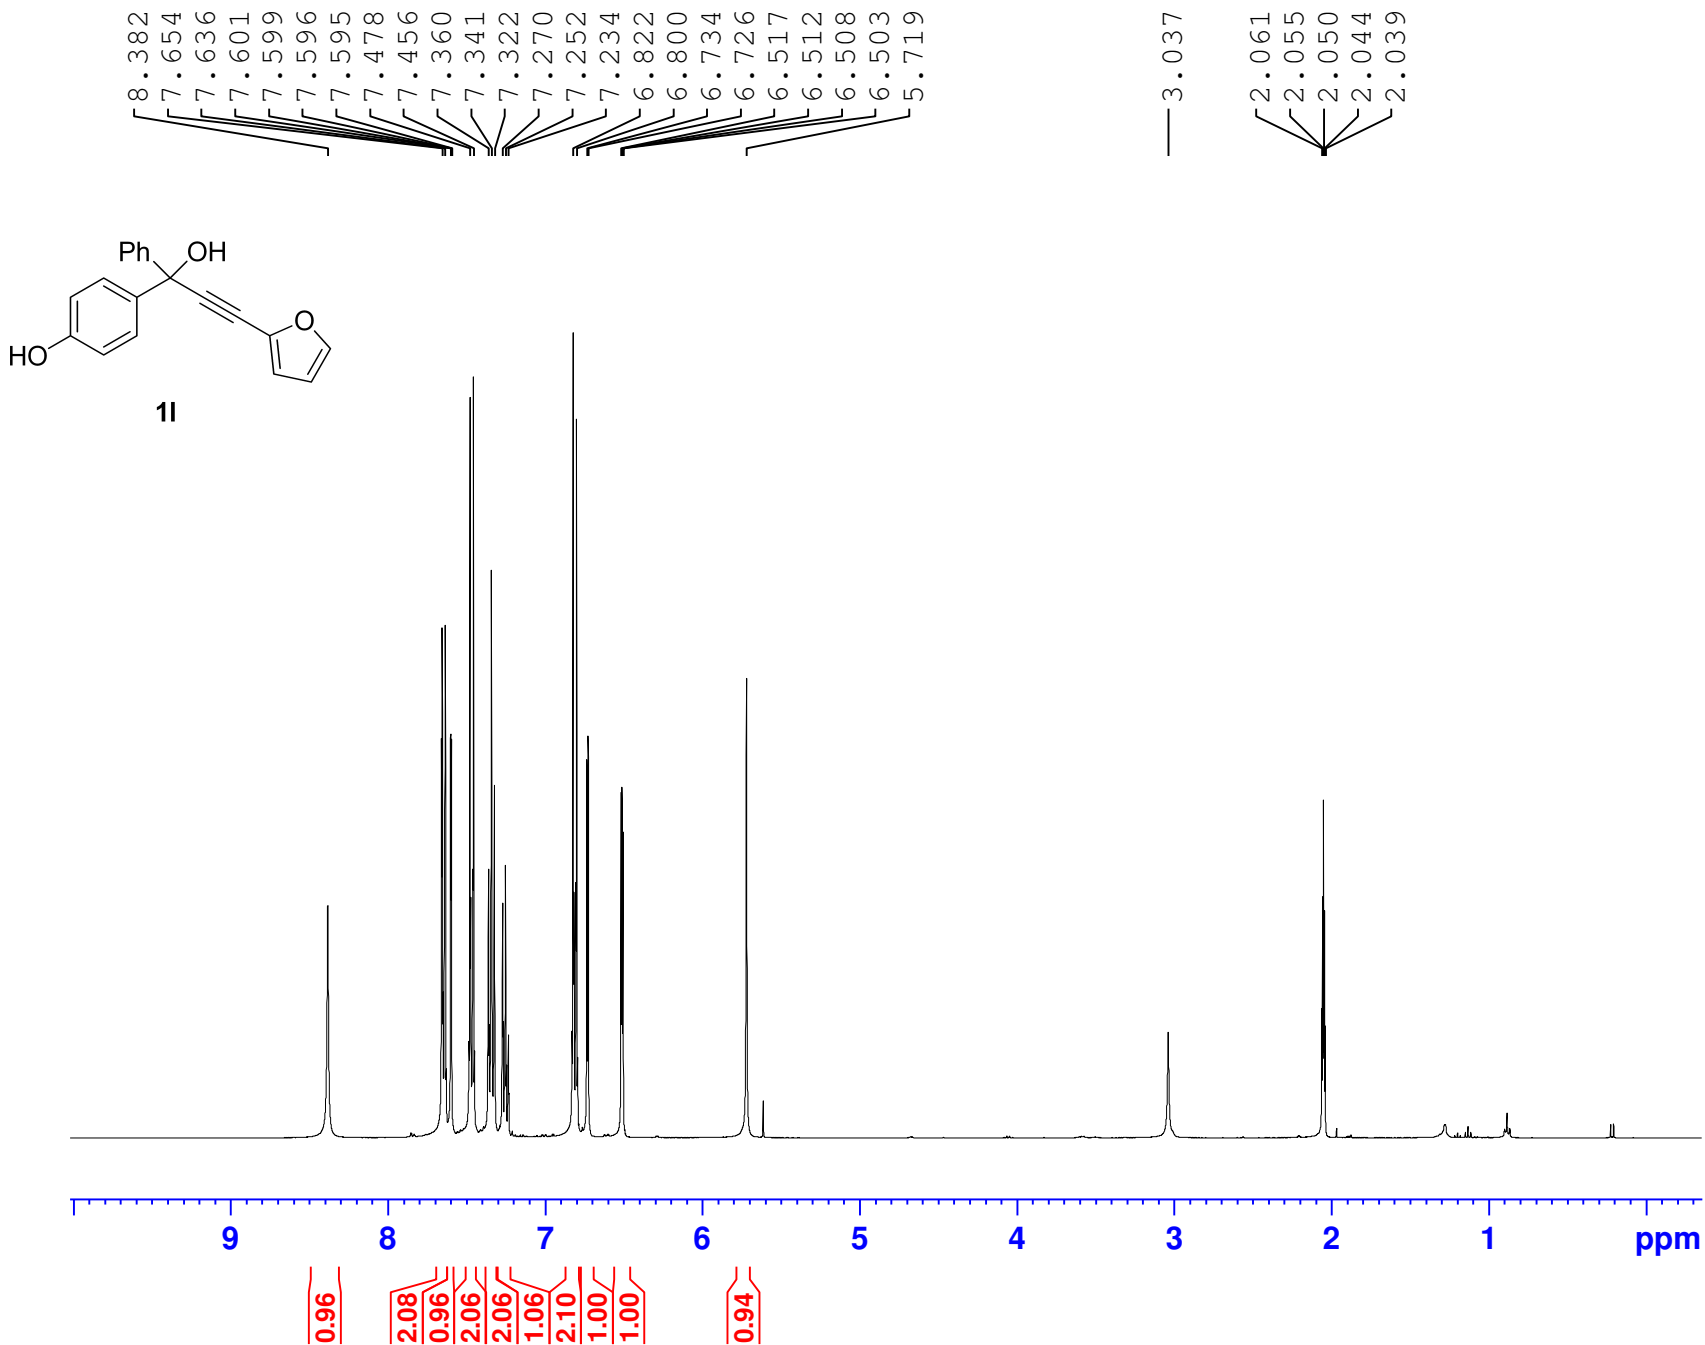

Current Data Parameters  
 NAME qdy-wcw-1019 H  
 EXPNO 3  
 PROCNO 1

F2 - Acquisition Parameters  
 Date\_ 20160326  
 Time 14.03  
 INSTRUM spect  
 PROBHD 5 mm PABBO BB/  
 PULPROG zg30  
 TD 65536  
 SOLVENT Acetone  
 NS 16  
 DS 0  
 SWH 8012.820 Hz  
 FIDRES 0.122266 Hz  
 AQ 4.0894465 sec  
 RG 54.81  
 DW 62.400 usec  
 DE 6.50 usec  
 TE 296.8 K  
 D1 1.00000000 sec  
 TD0 1

==== CHANNEL f1 =====  
 SFO1 400.1324710 MHz  
 NUC1 1H  
 P1 14.50 usec  
 PLW1 11.99499989 W

F2 - Processing parameters  
 SI 65536  
 SF 400.1300066 MHz  
 WDW EM  
 SSB 0  
 LB 0.30 Hz  
 GB 0  
 PC 1.00

Supplementary Figure 26. <sup>1</sup>H NMR spectrum for 11

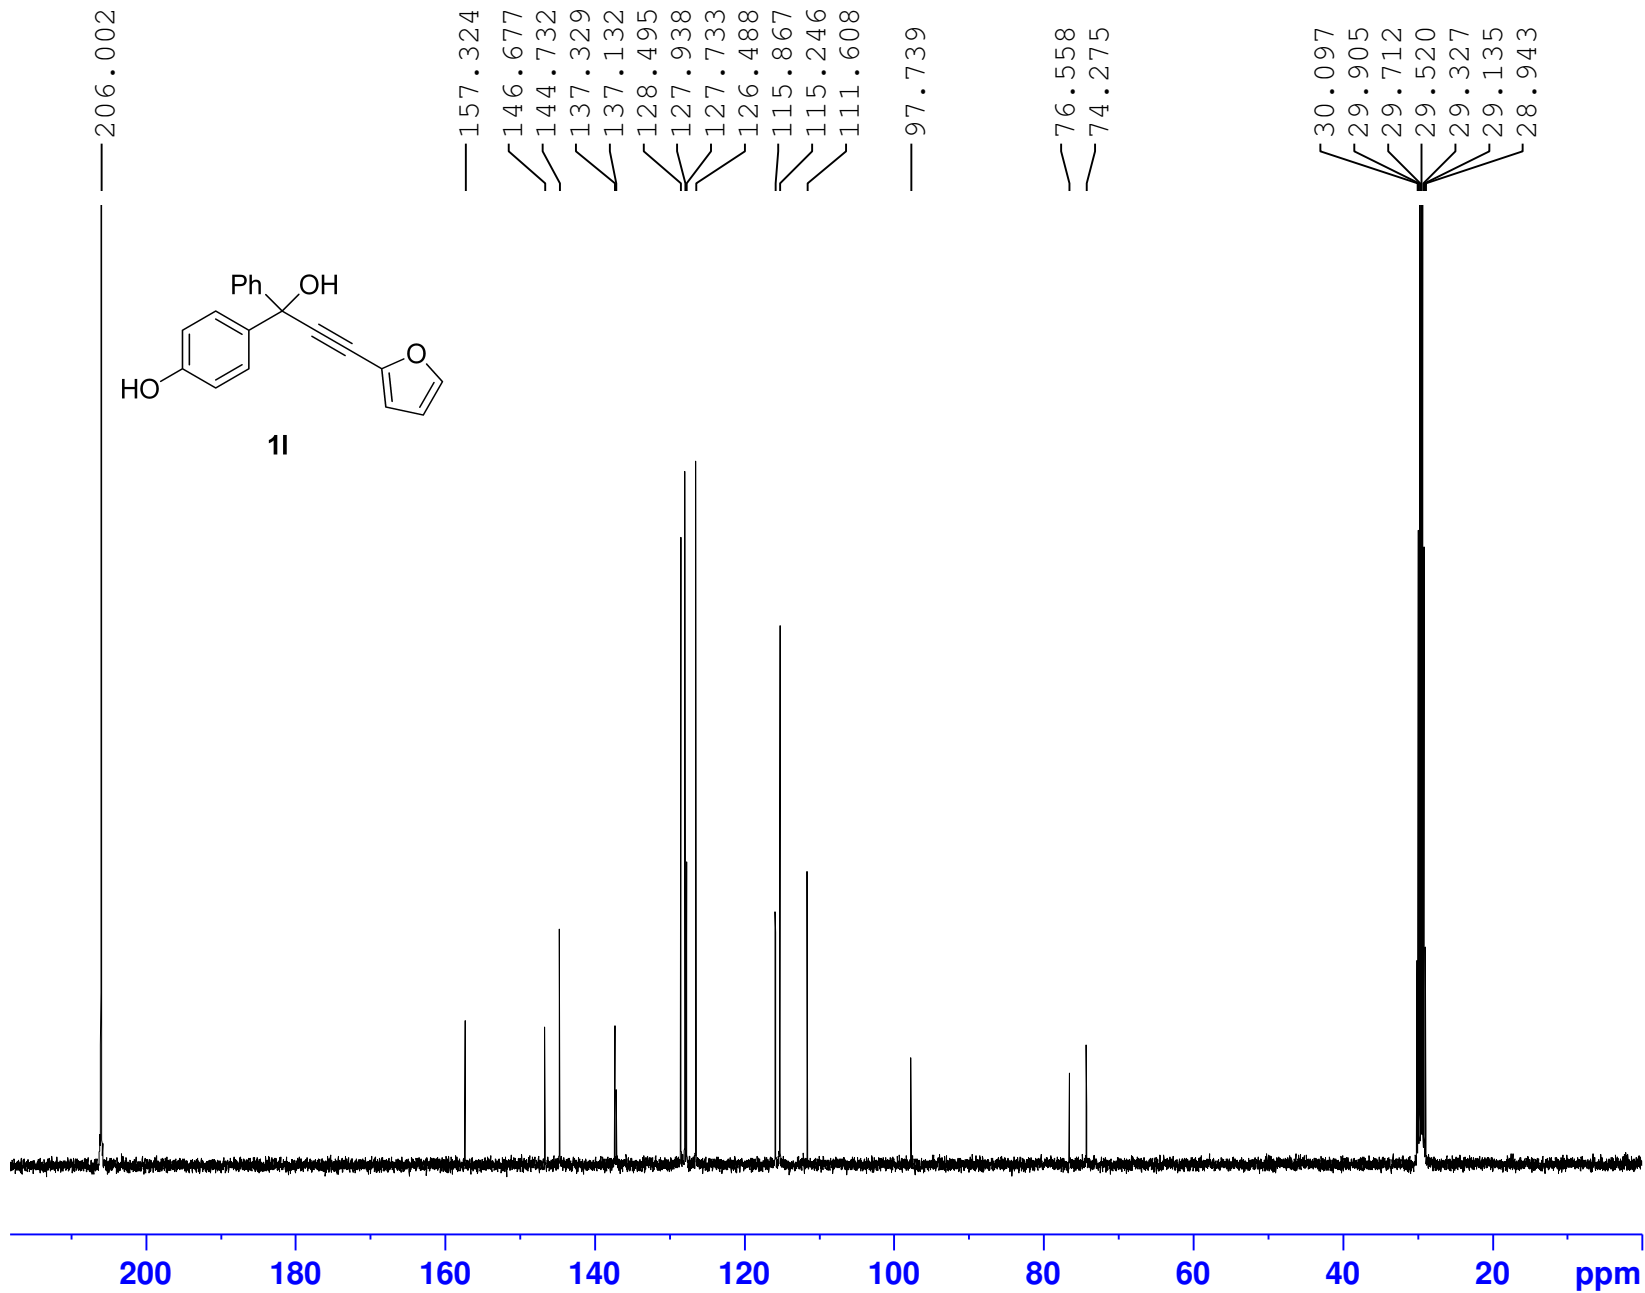

Current Data Parameters  
 NAME qdy-wcw-1019 C  
 EXPNO 3  
 PROCNO 1

F2 - Acquisition Parameters  
 Date\_ 20160326  
 Time 14.07  
 INSTRUM spect  
 PROBHD 5 mm PABBO BB/  
 PULPROG zgpg30  
 TD 65536  
 SOLVENT Acetone  
 NS 101  
 DS 0  
 SWH 24038.461 Hz  
 FIDRES 0.366798 Hz  
 AQ 1.3631488 sec  
 RG 196.92  
 DW 20.800 usec  
 DE 6.50 usec  
 TE 297.7 K  
 D1 2.00000000 sec  
 D11 0.03000000 sec  
 TD0 1

==== CHANNEL f1 =====  
 SFO1 100.6228298 MHz  
 NUC1 13C  
 P1 9.70 usec  
 PLW1 46.98899841 W

==== CHANNEL f2 =====  
 SFO2 400.1316005 MHz  
 NUC2 1H  
 CPDPRG[2] waltz16  
 PCPD2 90.00 usec  
 PLW2 11.99499989 W  
 PLW12 0.34213999 W  
 PLW13 0.27713001 W

F2 - Processing parameters  
 SI 32768  
 SF 100.6127162 MHz  
 WDW EM  
 SSB 0  
 LB 1.00 Hz  
 GB 0  
 PC 1.40

Supplementary Figure 27. <sup>13</sup>C NMR spectrum for **11**



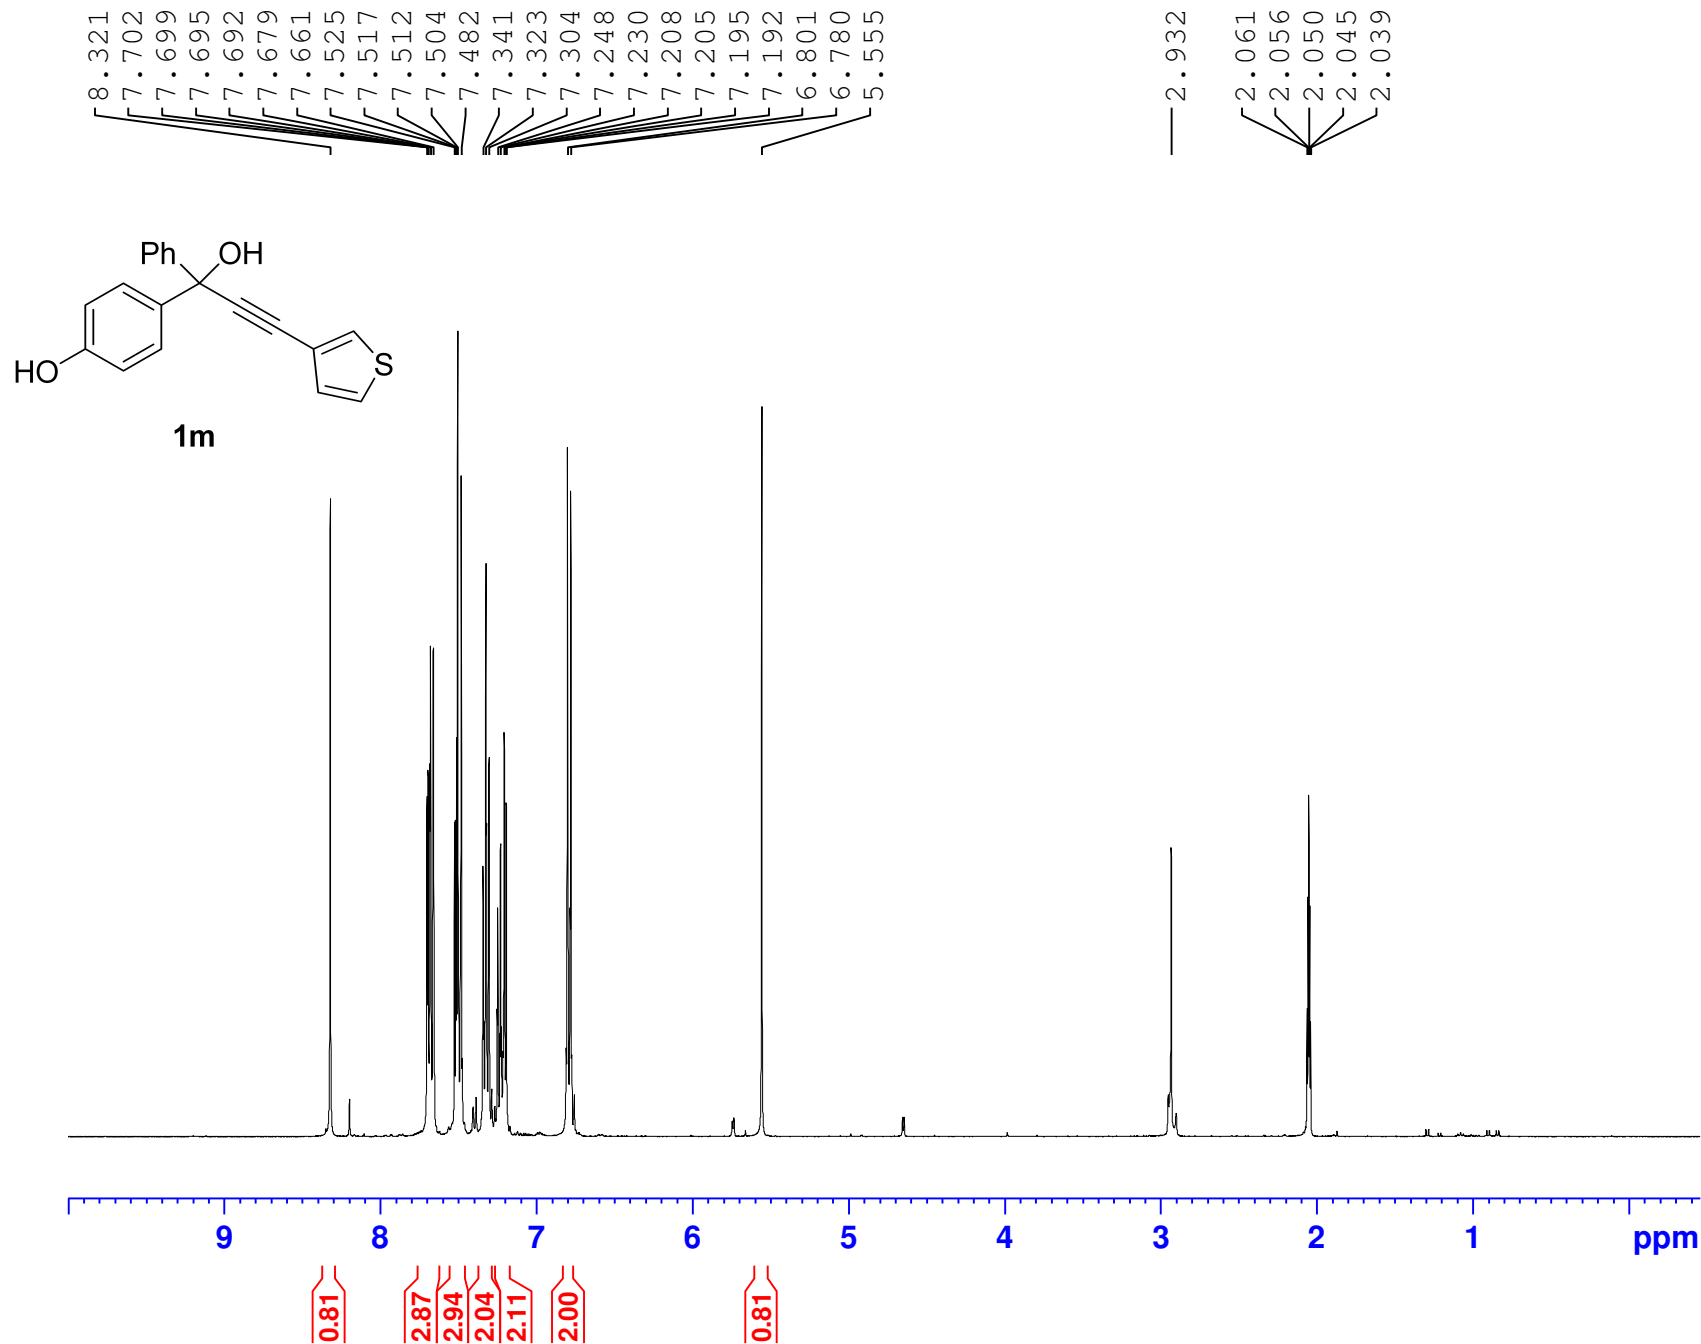

Current Data Parameters  
 NAME qdy-20058 H  
 EXPNO 2  
 PROCNO 1

F2 - Acquisition Parameters  
 Date\_ 20160227  
 Time 21.45  
 INSTRUM spect  
 PROBHD 5 mm PABBO BB/  
 PULPROG zg30  
 TD 65536  
 SOLVENT Acetone  
 NS 6  
 DS 0  
 SWH 8012.820 Hz  
 FIDRES 0.122266 Hz  
 AQ 4.0894465 sec  
 RG 112.31  
 DW 62.400 usec  
 DE 6.50 usec  
 TE 297.3 K  
 D1 1.00000000 sec  
 TD0 1

==== CHANNEL f1 =====  
 SFO1 400.1324710 MHz  
 NUC1 1H  
 P1 14.50 usec  
 PLW1 11.99499989 W

F2 - Processing parameters  
 SI 65536  
 SF 400.1300067 MHz  
 WDW EM  
 SSB 0  
 LB 0.30 Hz  
 GB 0  
 PC 1.00

**Supplementary Figure 28. <sup>1</sup>H NMR spectrum for 1m**

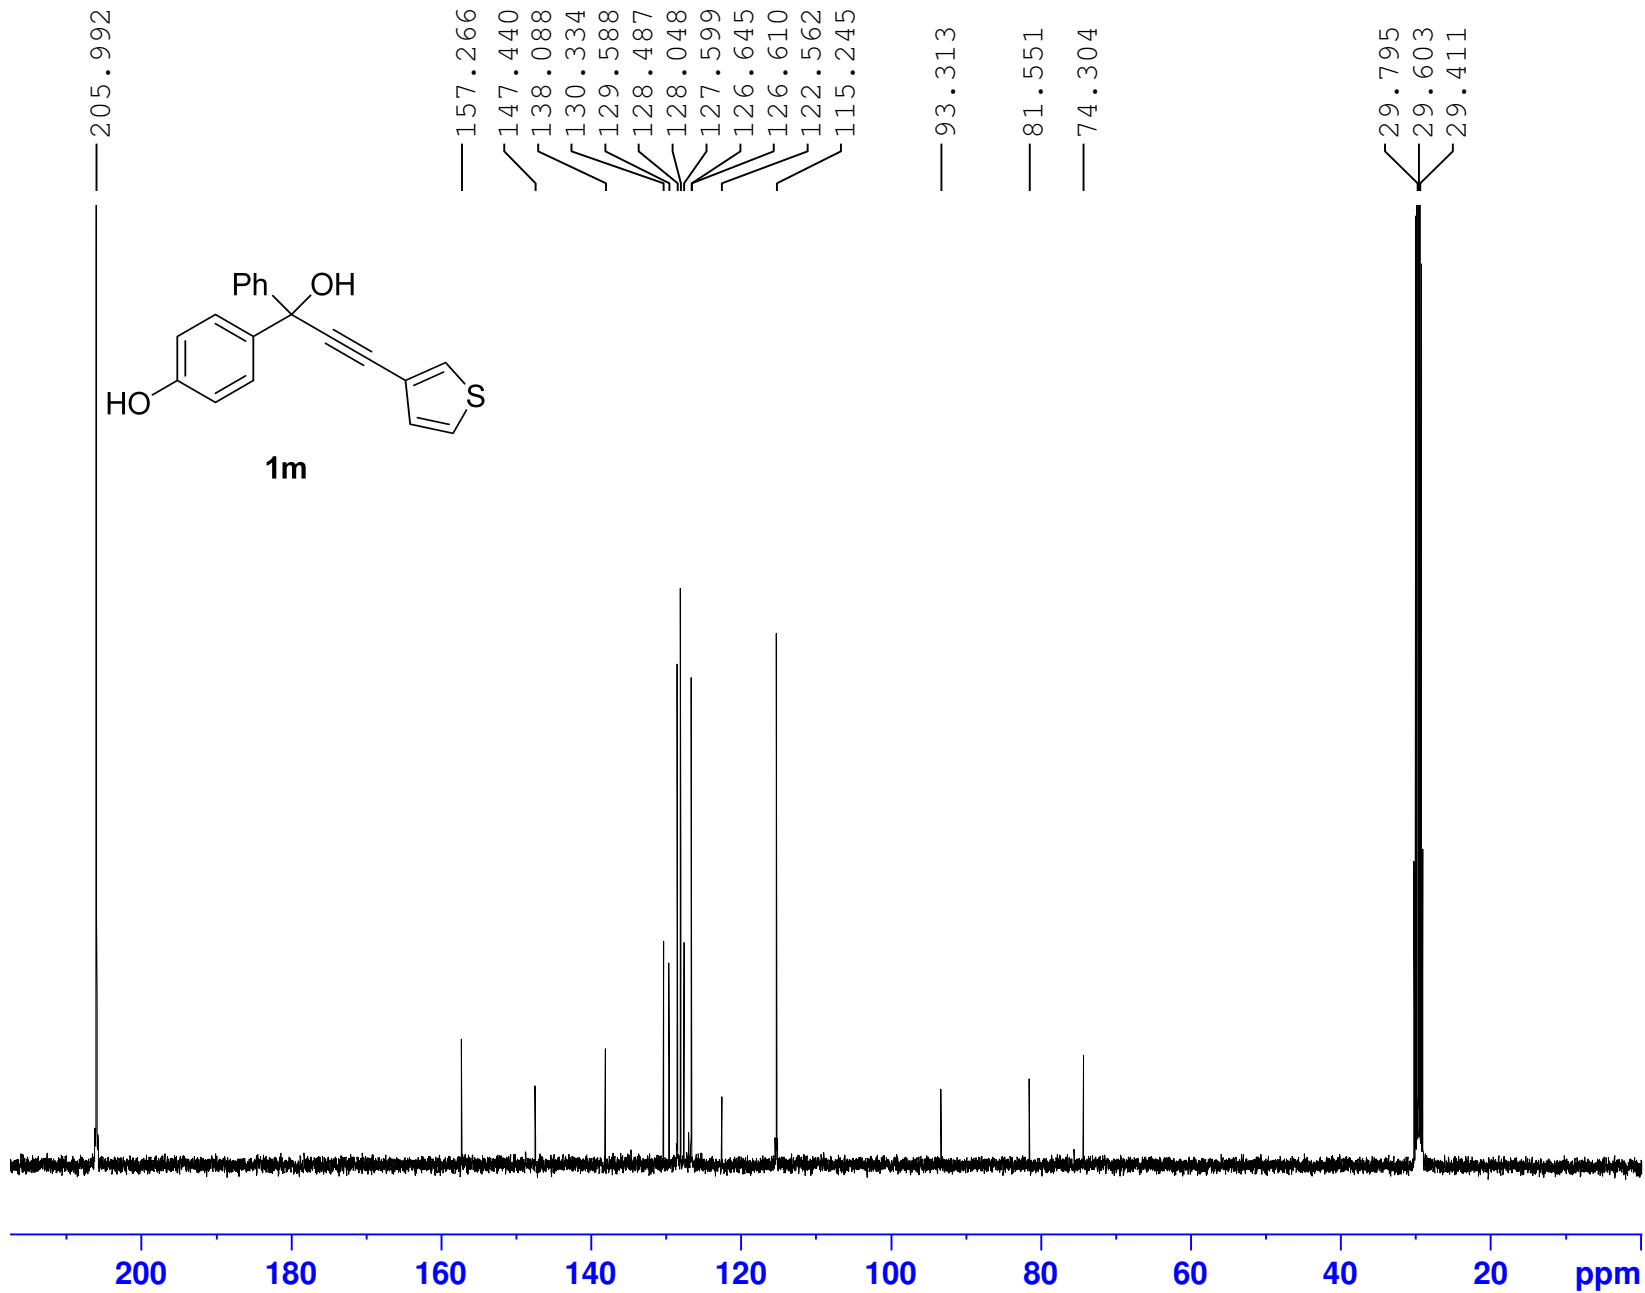

Current Data Parameters  
 NAME qdy-20058 C  
 EXPNO 1  
 PROCNO 1

F2 - Acquisition Parameters  
 Date\_ 20160227  
 Time 16.55  
 INSTRUM spect  
 PROBHD 5 mm PABBO BB/  
 PULPROG zgpg30  
 TD 65536  
 SOLVENT Acetone  
 NS 159  
 DS 0  
 SWH 24038.461 Hz  
 FIDRES 0.366798 Hz  
 AQ 1.3631488 sec  
 RG 196.92  
 DW 20.800 usec  
 DE 6.50 usec  
 TE 297.5 K  
 D1 2.00000000 sec  
 D11 0.03000000 sec  
 TD0 1

==== CHANNEL f1 =====  
 SFO1 100.6228298 MHz  
 NUC1 13C  
 P1 9.70 usec  
 PLW1 46.98899841 W

==== CHANNEL f2 =====  
 SFO2 400.1316005 MHz  
 NUC2 1H  
 CPDPRG[2] waltz16  
 PCPD2 90.00 usec  
 PLW2 11.99499989 W  
 PLW12 0.34213999 W  
 PLW13 0.27713001 W

F2 - Processing parameters  
 SI 32768  
 SF 100.6127052 MHz  
 WDW EM  
 SSB 0  
 LB 1.00 Hz  
 GB 0  
 PC 1.40

**Supplementary Figure 29. <sup>13</sup>C NMR spectrum for 1m**

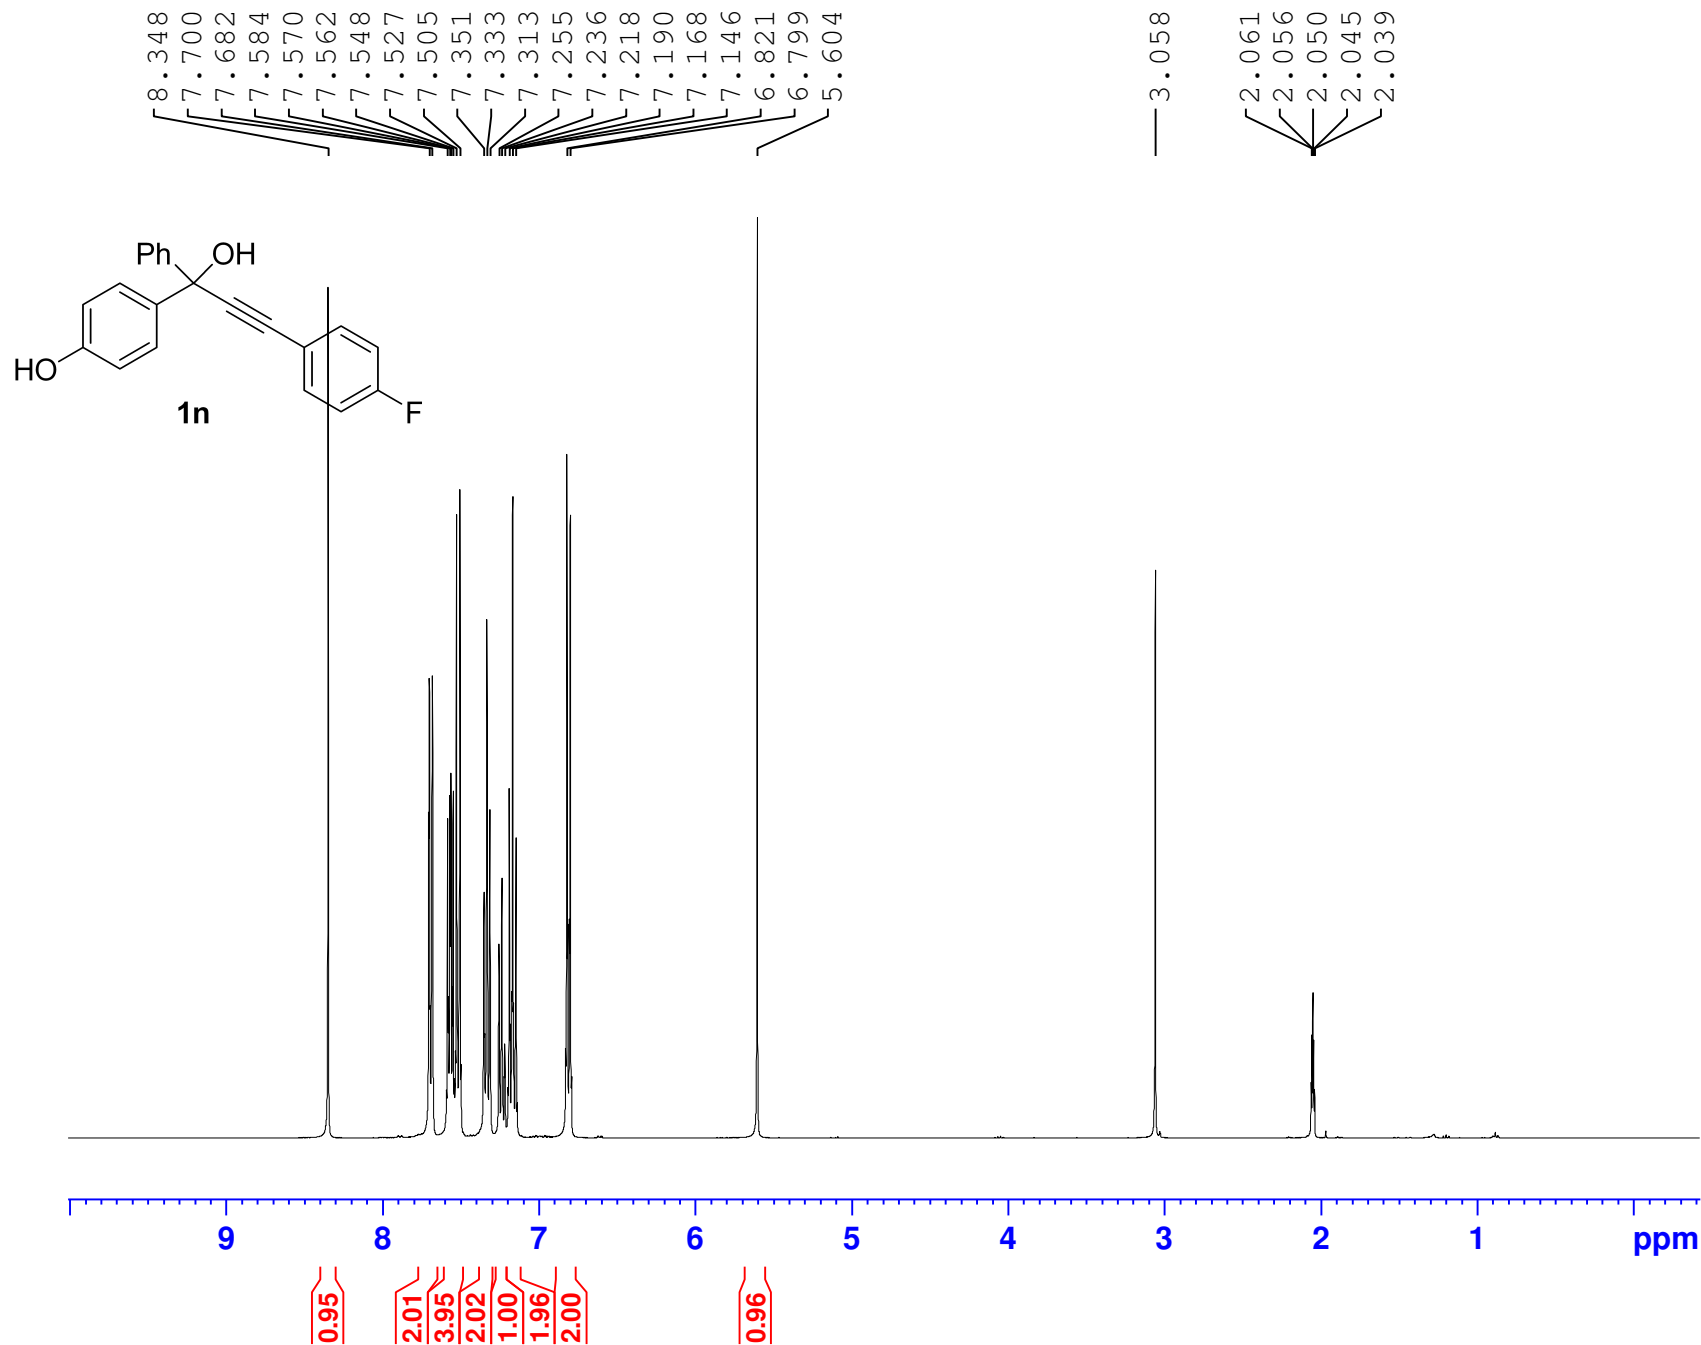

Current Data Parameters  
 NAME qdy-20143-H  
 EXPNO 1  
 PROCNO 1

F2 - Acquisition Parameters  
 Date\_ 20160508  
 Time 21.51  
 INSTRUM spect  
 PROBHD 5 mm PABBO BB/  
 PULPROG zg30  
 TD 65536  
 SOLVENT Acetone  
 NS 6  
 DS 0  
 SWH 8012.820 Hz  
 FIDRES 0.122266 Hz  
 AQ 4.0894465 sec  
 RG 49.32  
 DW 62.400 usec  
 DE 6.50 usec  
 TE 298.9 K  
 D1 1.00000000 sec  
 TD0 1

==== CHANNEL f1 =====  
 SFO1 400.1324710 MHz  
 NUC1 1H  
 P1 14.50 usec  
 PLW1 11.99499989 W

F2 - Processing parameters  
 SI 65536  
 SF 400.1300066 MHz  
 WDW EM  
 SSB 0  
 LB 0.30 Hz  
 GB 0  
 PC 1.00

Supplementary Figure 30. <sup>1</sup>H NMR spectrum for 1n

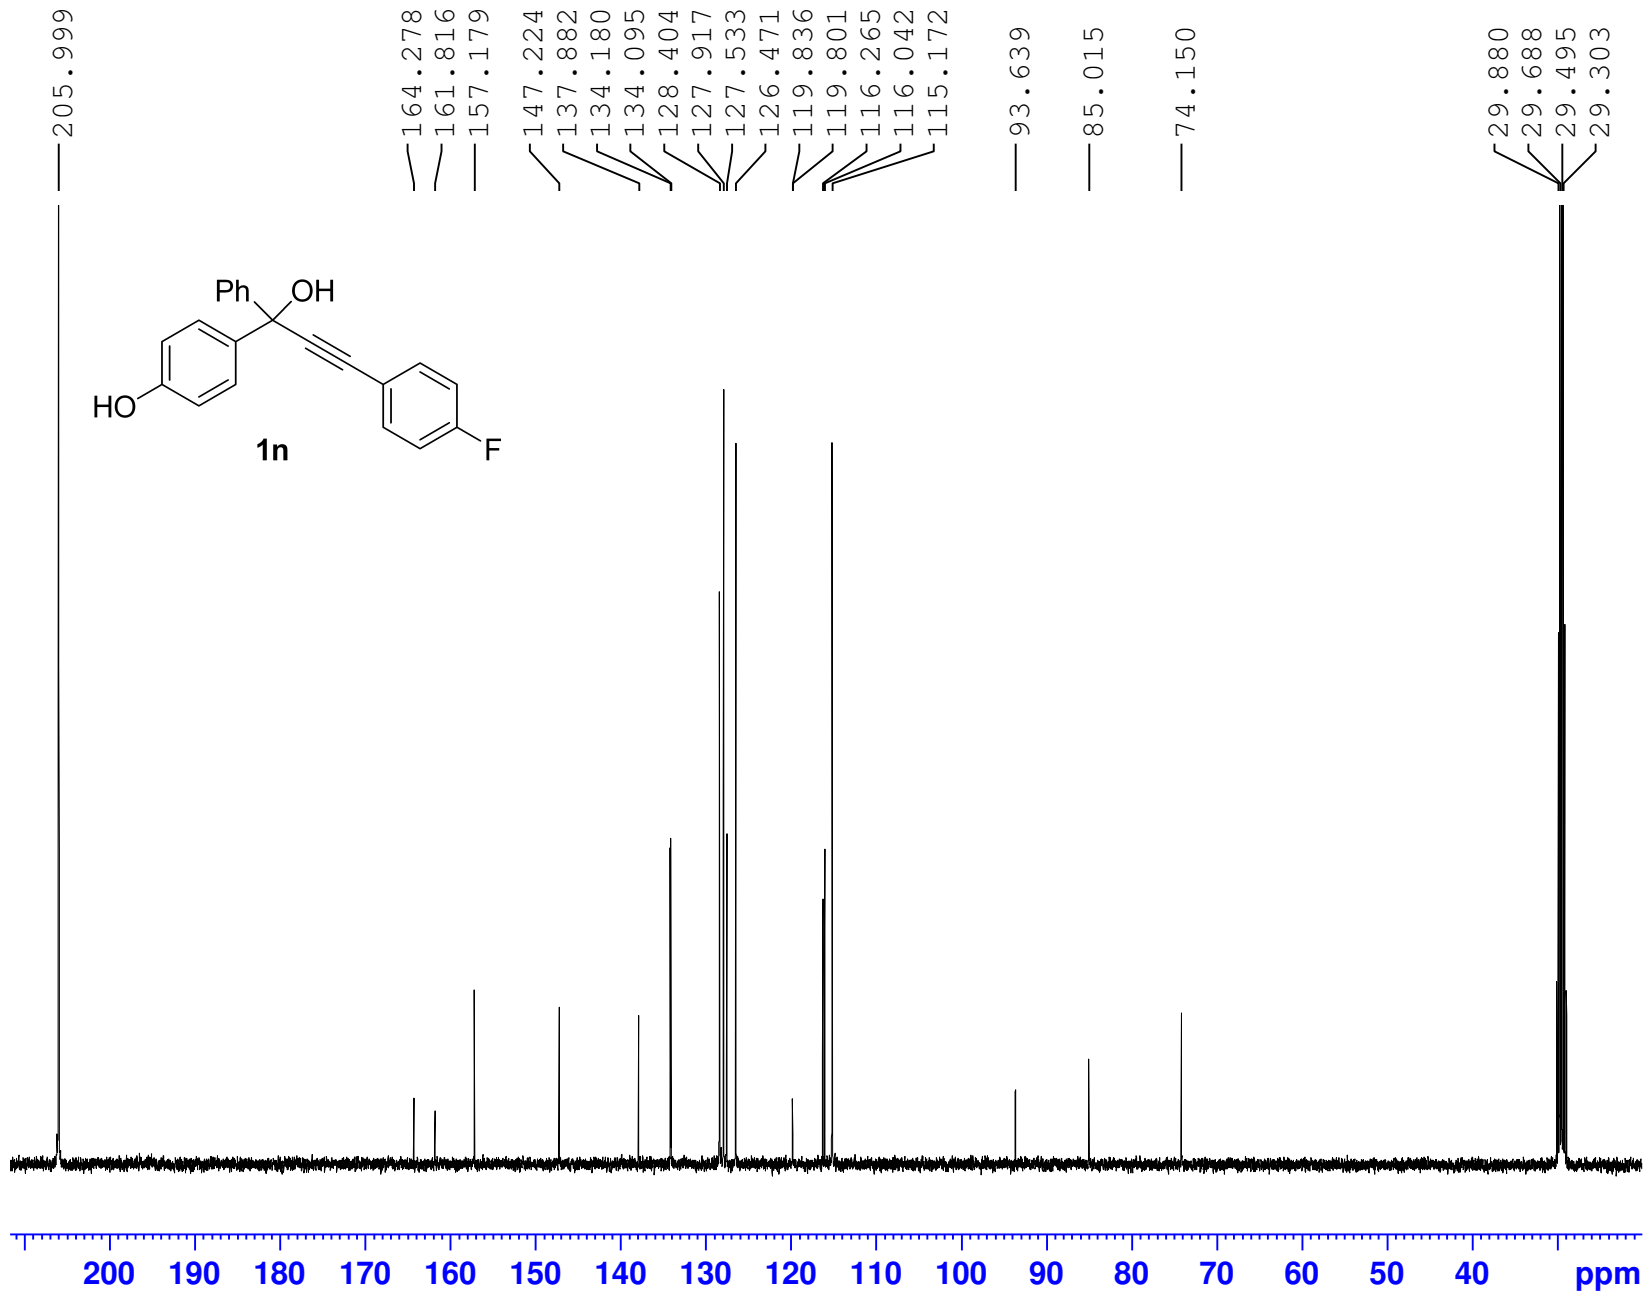

Current Data Parameters  
 NAME qdy-20143-C  
 EXPNO 1  
 PROCNO 1

F2 - Acquisition Parameters  
 Date\_ 20160508  
 Time 21.54  
 INSTRUM spect  
 PROBHD 5 mm PABBO BB/  
 PULPROG zgpg30  
 TD 65536  
 SOLVENT Acetone  
 NS 80  
 DS 0  
 SWH 24038.461 Hz  
 FIDRES 0.366798 Hz  
 AQ 1.3631488 sec  
 RG 196.92  
 DW 20.800 usec  
 DE 6.50 usec  
 TE 299.7 K  
 D1 2.00000000 sec  
 D11 0.03000000 sec  
 TD0 1

==== CHANNEL f1 =====  
 SFO1 100.6228298 MHz  
 NUC1 13C  
 P1 9.70 usec  
 PLW1 46.98899841 W

==== CHANNEL f2 =====  
 SFO2 400.1316005 MHz  
 NUC2 1H  
 CPDPRG[2] waltz16  
 PCPD2 90.00 usec  
 PLW2 11.99499989 W  
 PLW12 0.34213999 W  
 PLW13 0.27713001 W

F2 - Processing parameters  
 SI 32768  
 SF 100.6127184 MHz  
 WDW EM  
 SSB 0  
 LB 1.00 Hz  
 GB 0  
 PC 1.40

Supplementary Figure 31. <sup>13</sup>C NMR spectrum for **1n**

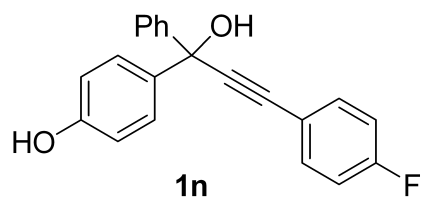

— -112.405

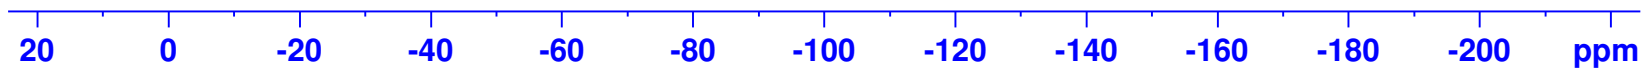

Current Data Parameters  
 NAME qdy-20143-F  
 EXPNO 1  
 PROCNO 1

F2 - Acquisition Parameters  
 Date\_ 20160508  
 Time 22.04  
 INSTRUM spect  
 PROBHD 5 mm PABBO BB/  
 PULPROG zgpg30  
 TD 65536  
 SOLVENT Acetone  
 NS 4  
 DS 0  
 SWH 93750.000 Hz  
 FIDRES 1.430511 Hz  
 AQ 0.3495253 sec  
 RG 196.92  
 DW 5.333 usec  
 DE 6.50 usec  
 TE 299.0 K  
 D1 2.00000000 sec  
 D11 0.03000000 sec  
 TD0 1

==== CHANNEL f1 =====  
 SFO1 376.4607162 MHz  
 NUC1 19F  
 P1 14.70 usec  
 PLW1 15.99600029 W

==== CHANNEL f2 =====  
 SFO2 400.1316005 MHz  
 NUC2 1H  
 CPDPRG[2] waltz16  
 PCPD2 90.00 usec  
 PLW2 11.99499989 W  
 PLW12 0.34213999 W  
 PLW13 0.27713001 W

F2 - Processing parameters  
 SI 32768  
 SF 376.4983660 MHz  
 WDW EM  
 SSB 0  
 LB 1.00 Hz  
 GB 0  
 PC 1.40

**Supplementary Figure 32. <sup>19</sup>F NMR spectrum for 1n**

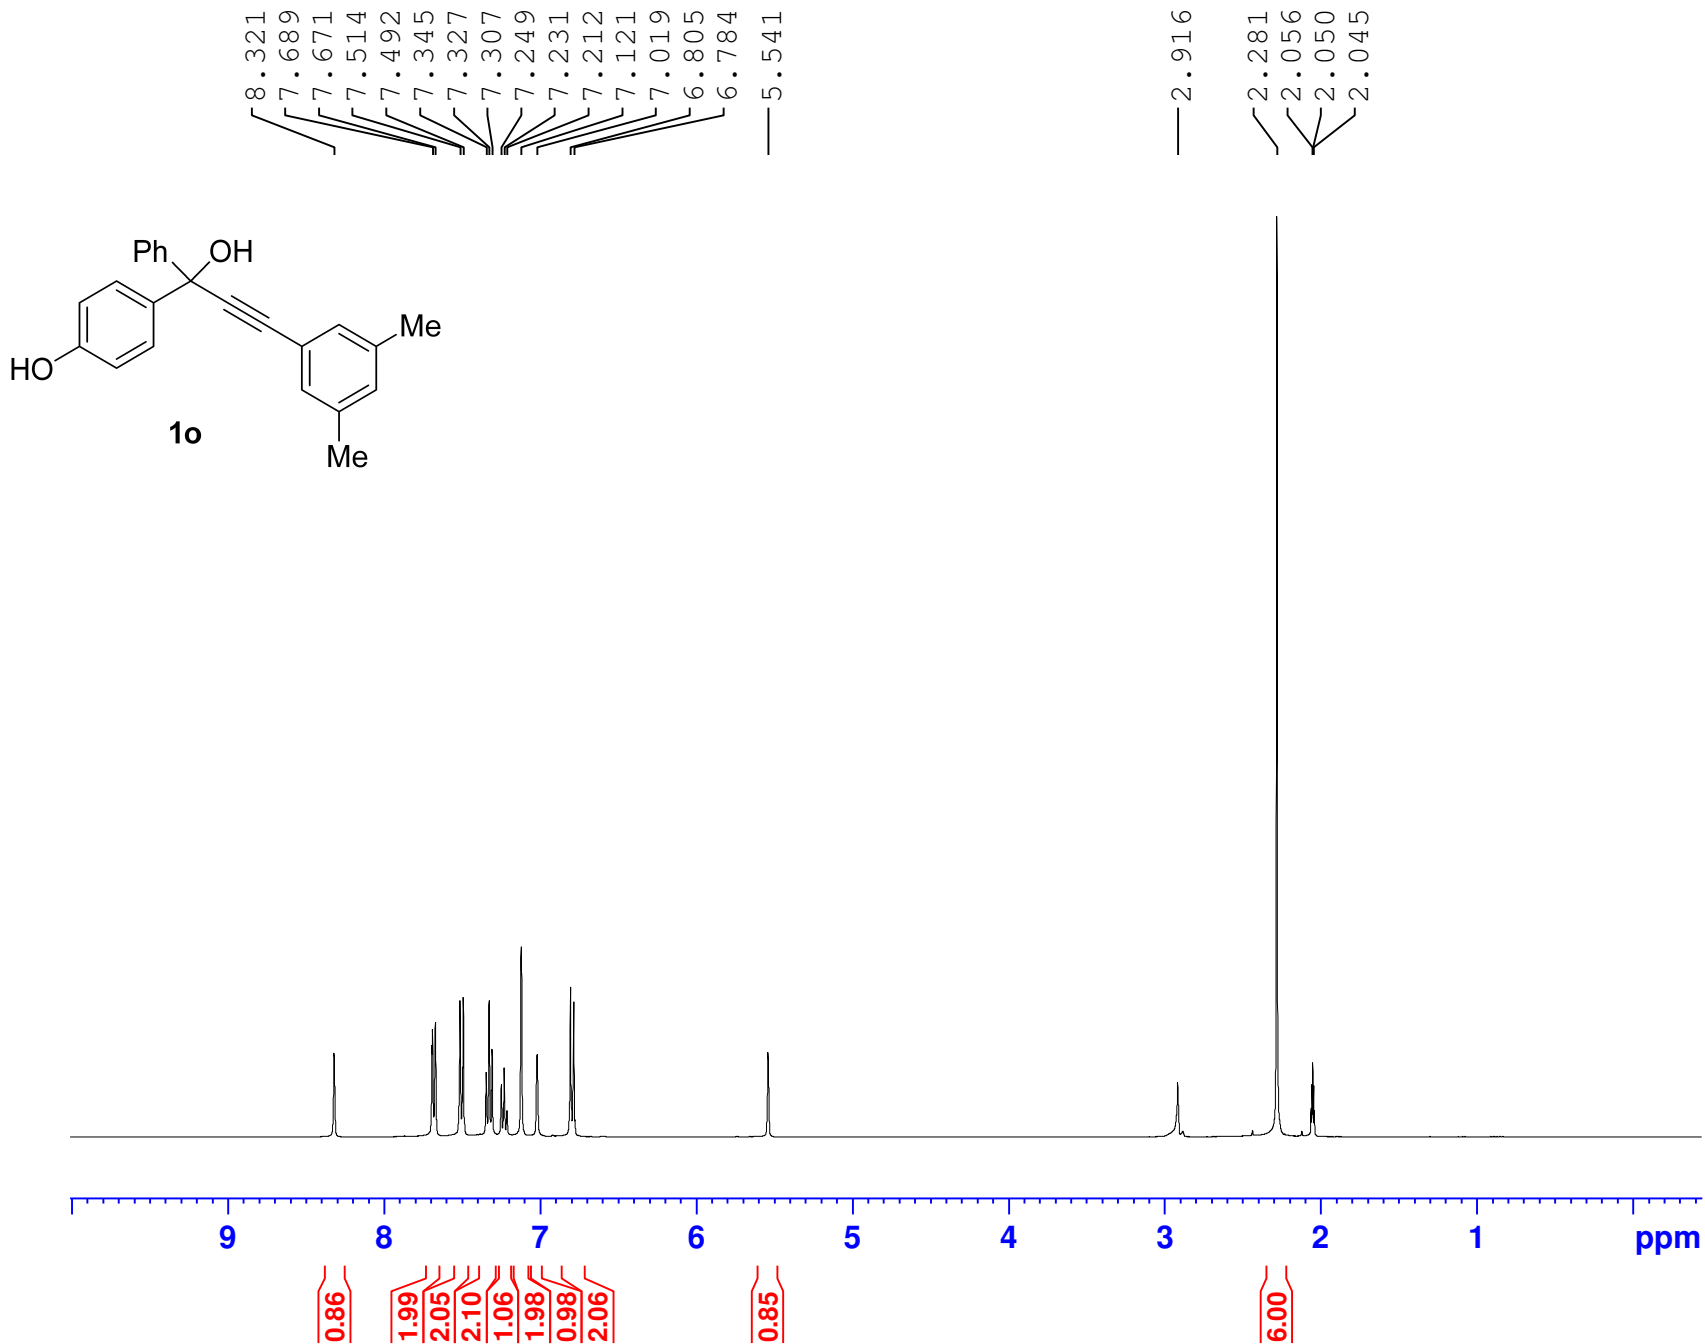

Current Data Parameters  
 NAME qdy-wcw-1013 H  
 EXPNO 2  
 PROCNO 1

F2 - Acquisition Parameters  
 Date\_ 20160301  
 Time 21.43  
 INSTRUM spect  
 PROBHD 5 mm PABBO BB/  
 PULPROG zg30  
 TD 65536  
 SOLVENT Acetone  
 NS 16  
 DS 0  
 SWH 8012.820 Hz  
 FIDRES 0.122266 Hz  
 AQ 4.0894465 sec  
 RG 82.92  
 DW 62.400 usec  
 DE 6.50 usec  
 TE 297.3 K  
 D1 1.00000000 sec  
 TD0 1

==== CHANNEL f1 =====  
 SFO1 400.1324710 MHz  
 NUC1 1H  
 P1 14.50 usec  
 PLW1 11.99499989 W

F2 - Processing parameters  
 SI 65536  
 SF 400.1300066 MHz  
 WDW EM  
 SSB 0  
 LB 0.30 Hz  
 GB 0  
 PC 1.00

**Supplementary Figure 33. <sup>1</sup>H NMR spectrum for 1o**

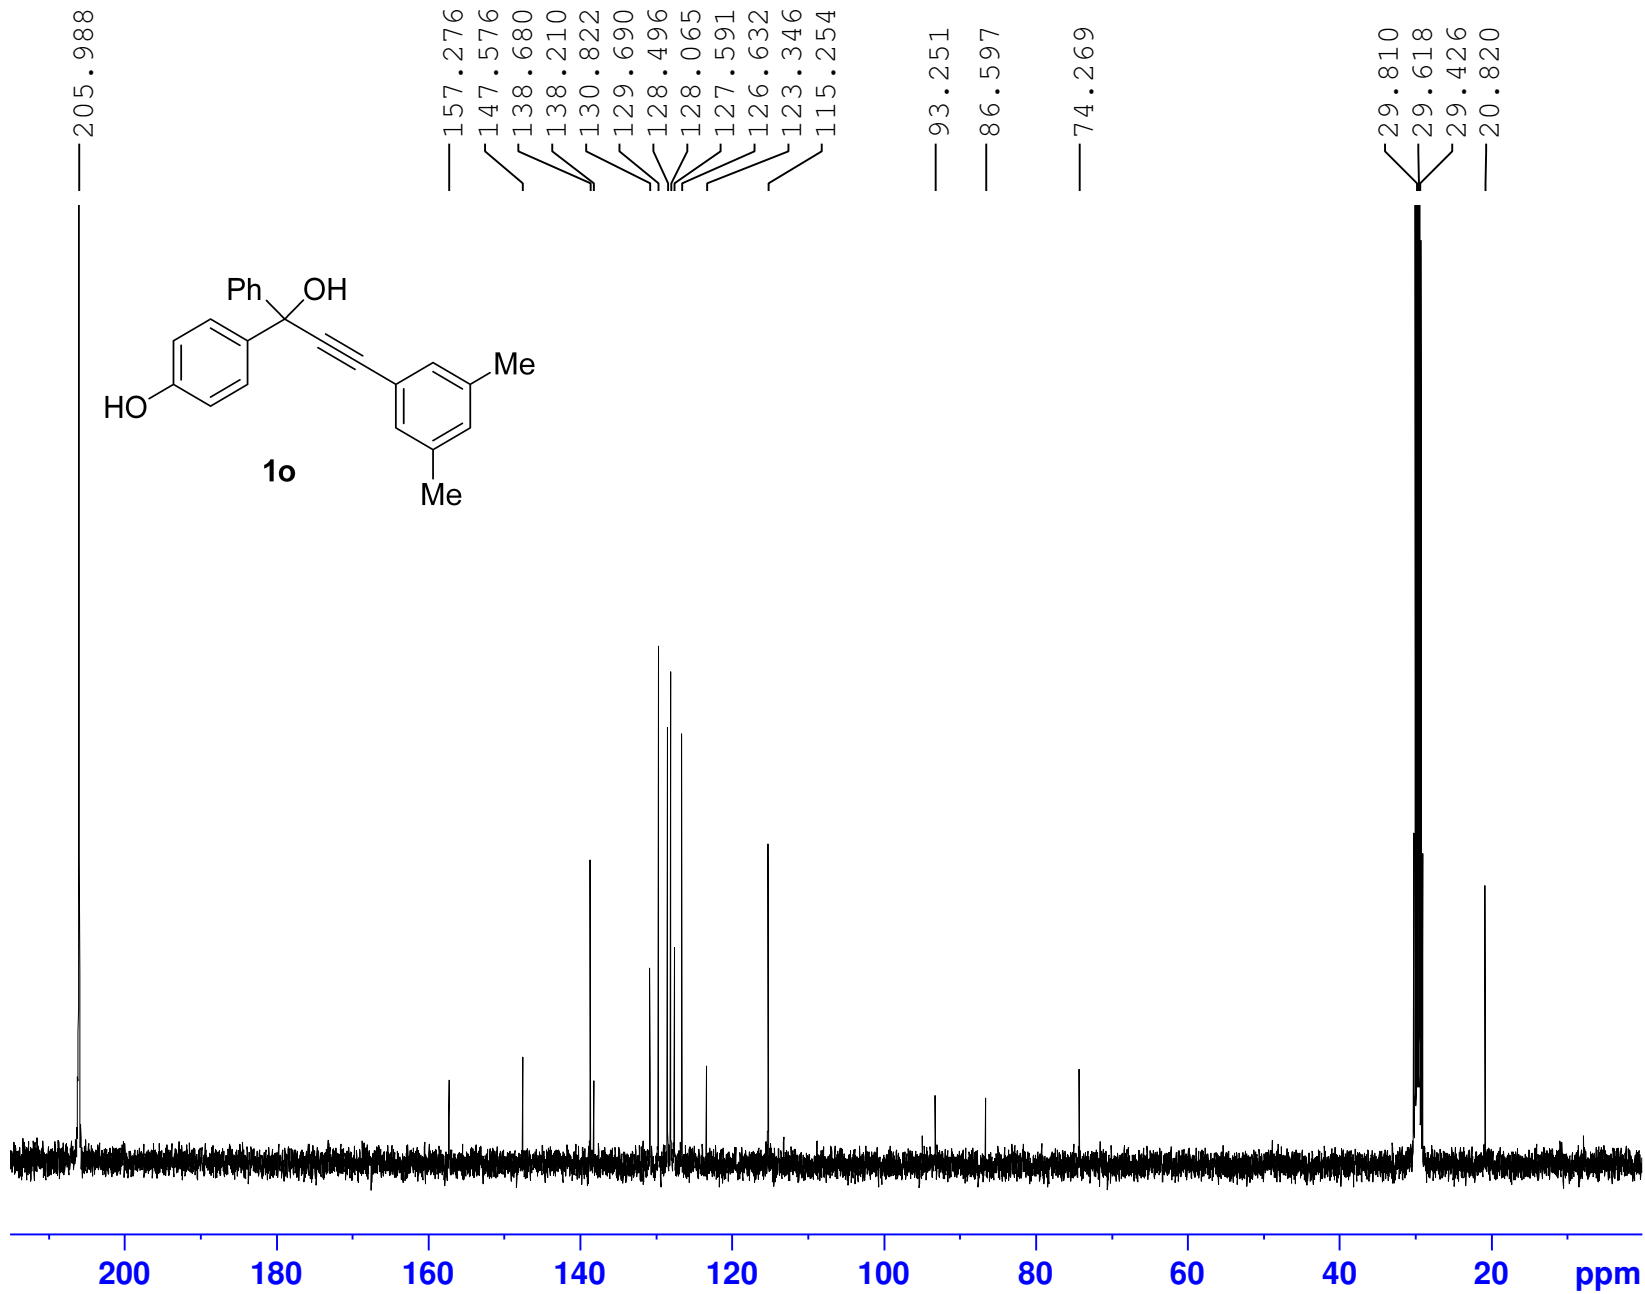

Current Data Parameters  
 NAME qdy-wcw-1013 C  
 EXPNO 2  
 PROCNO 1

F2 - Acquisition Parameters  
 Date\_ 20160301  
 Time 21.36  
 INSTRUM spect  
 PROBHD 5 mm PABBO BB/  
 PULPROG zgpg30  
 TD 65536  
 SOLVENT Acetone  
 NS 81  
 DS 0  
 SWH 24038.461 Hz  
 FIDRES 0.366798 Hz  
 AQ 1.3631488 sec  
 RG 196.92  
 DW 20.800 usec  
 DE 6.50 usec  
 TE 297.7 K  
 D1 2.00000000 sec  
 D11 0.03000000 sec  
 TD0 1

==== CHANNEL f1 =====  
 SFO1 100.6228298 MHz  
 NUC1 13C  
 P1 9.70 usec  
 PLW1 46.98899841 W

==== CHANNEL f2 =====  
 SFO2 400.1316005 MHz  
 NUC2 1H  
 CPDPRG[2] waltz16  
 PCPD2 90.00 usec  
 PLW2 11.99499989 W  
 PLW12 0.34213999 W  
 PLW13 0.27713001 W

F2 - Processing parameters  
 SI 32768  
 SF 100.6127029 MHz  
 WDW EM  
 SSB 0  
 LB 1.00 Hz  
 GB 0  
 PC 1.40

Supplementary Figure 34. <sup>13</sup>C NMR spectrum for **1o**

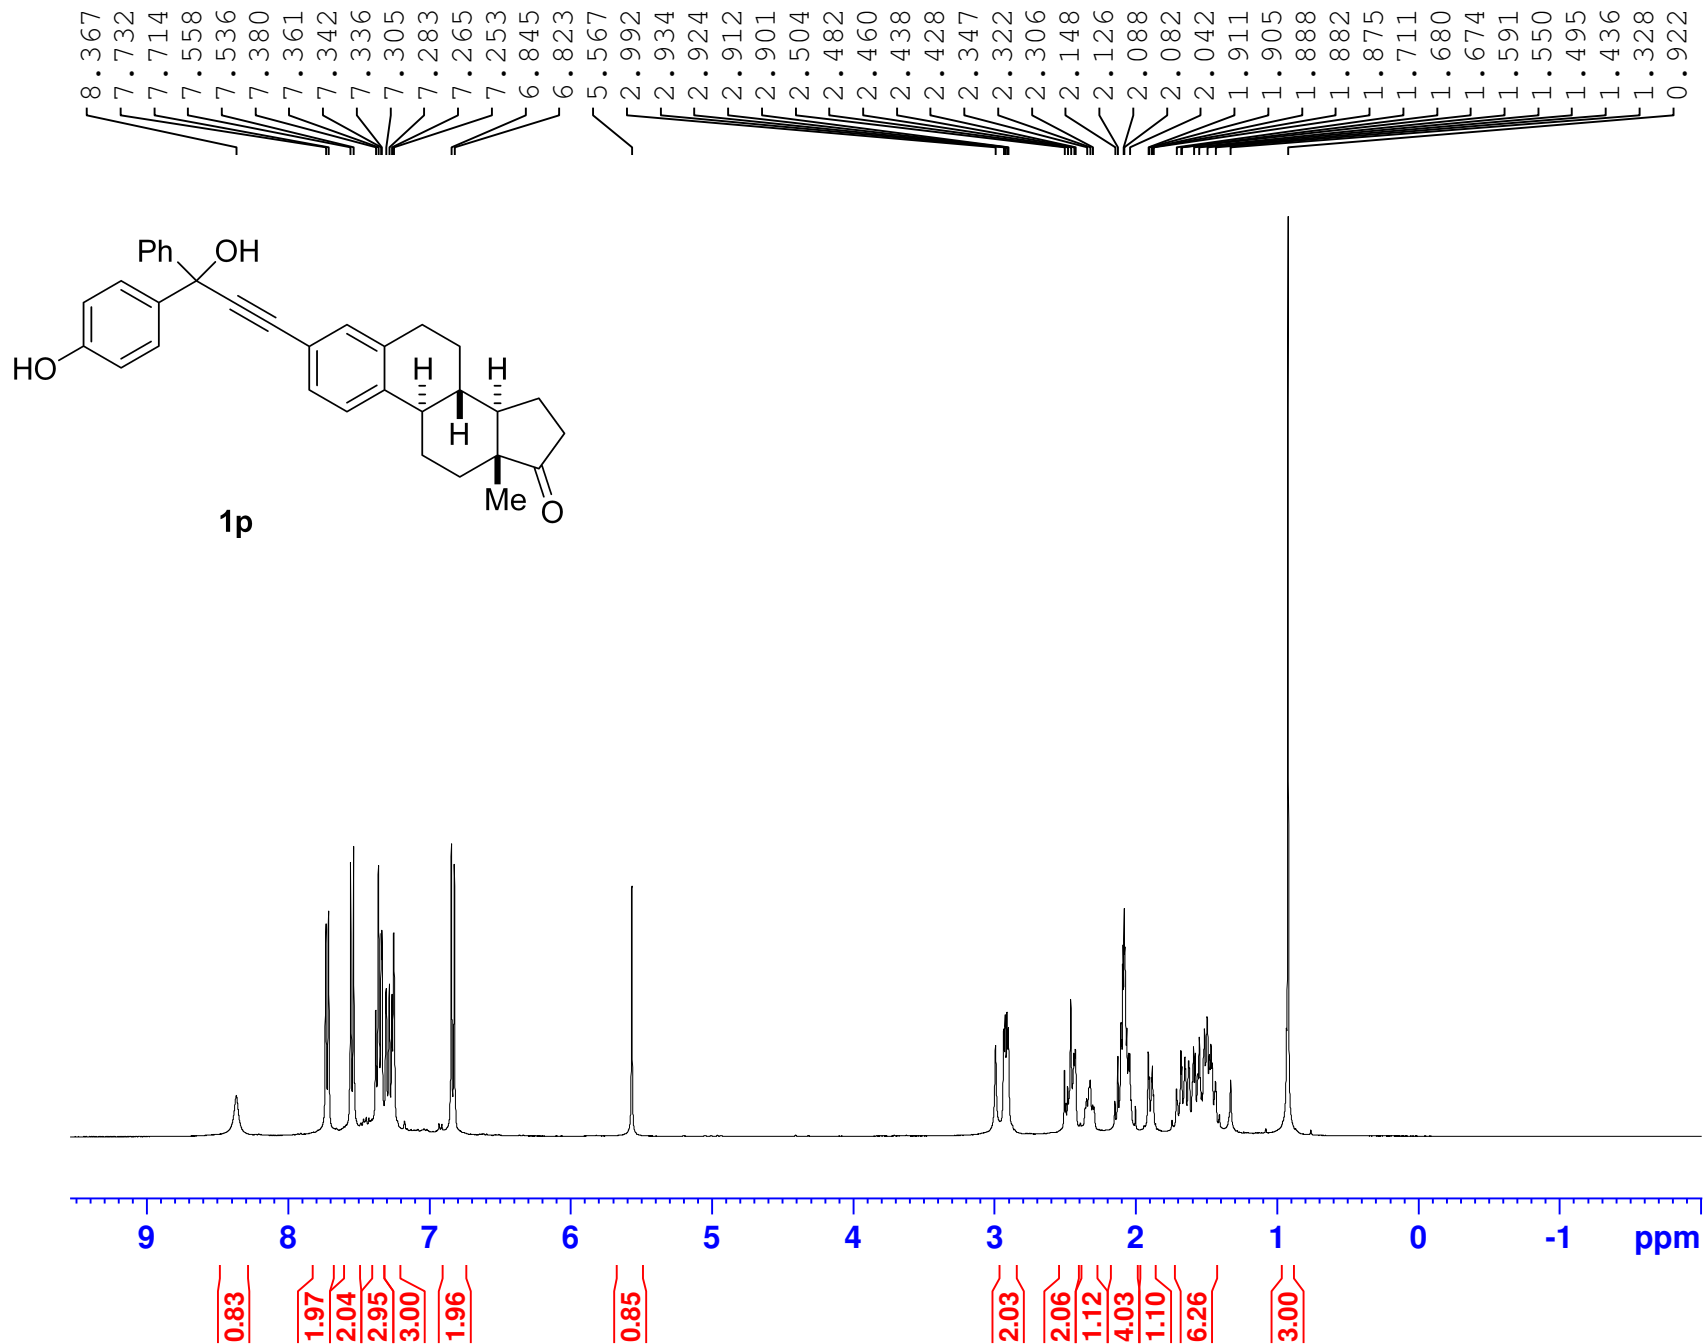

Current Data Parameters  
 NAME qdy-20110-2 H  
 EXPNO 3  
 PROCNO 1

F2 - Acquisition Parameters  
 Date\_ 20160415  
 Time 23.03  
 INSTRUM spect  
 PROBHD 5 mm PABBO BB/  
 PULPROG zg30  
 TD 65536  
 SOLVENT Acetone  
 NS 12  
 DS 0  
 SWH 8012.820 Hz  
 FIDRES 0.122266 Hz  
 AQ 4.0894465 sec  
 RG 49.32  
 DW 62.400 usec  
 DE 6.50 usec  
 TE 297.7 K  
 D1 1.00000000 sec  
 TD0 1

==== CHANNEL f1 =====  
 SFO1 400.1324710 MHz  
 NUC1 1H  
 P1 14.50 usec  
 PLW1 11.99499989 W

F2 - Processing parameters  
 SI 65536  
 SF 400.1299916 MHz  
 WDW EM  
 SSB 0  
 LB 0.30 Hz  
 GB 0  
 PC 1.00

Supplementary Figure 35. <sup>1</sup>H NMR spectrum for **1p**



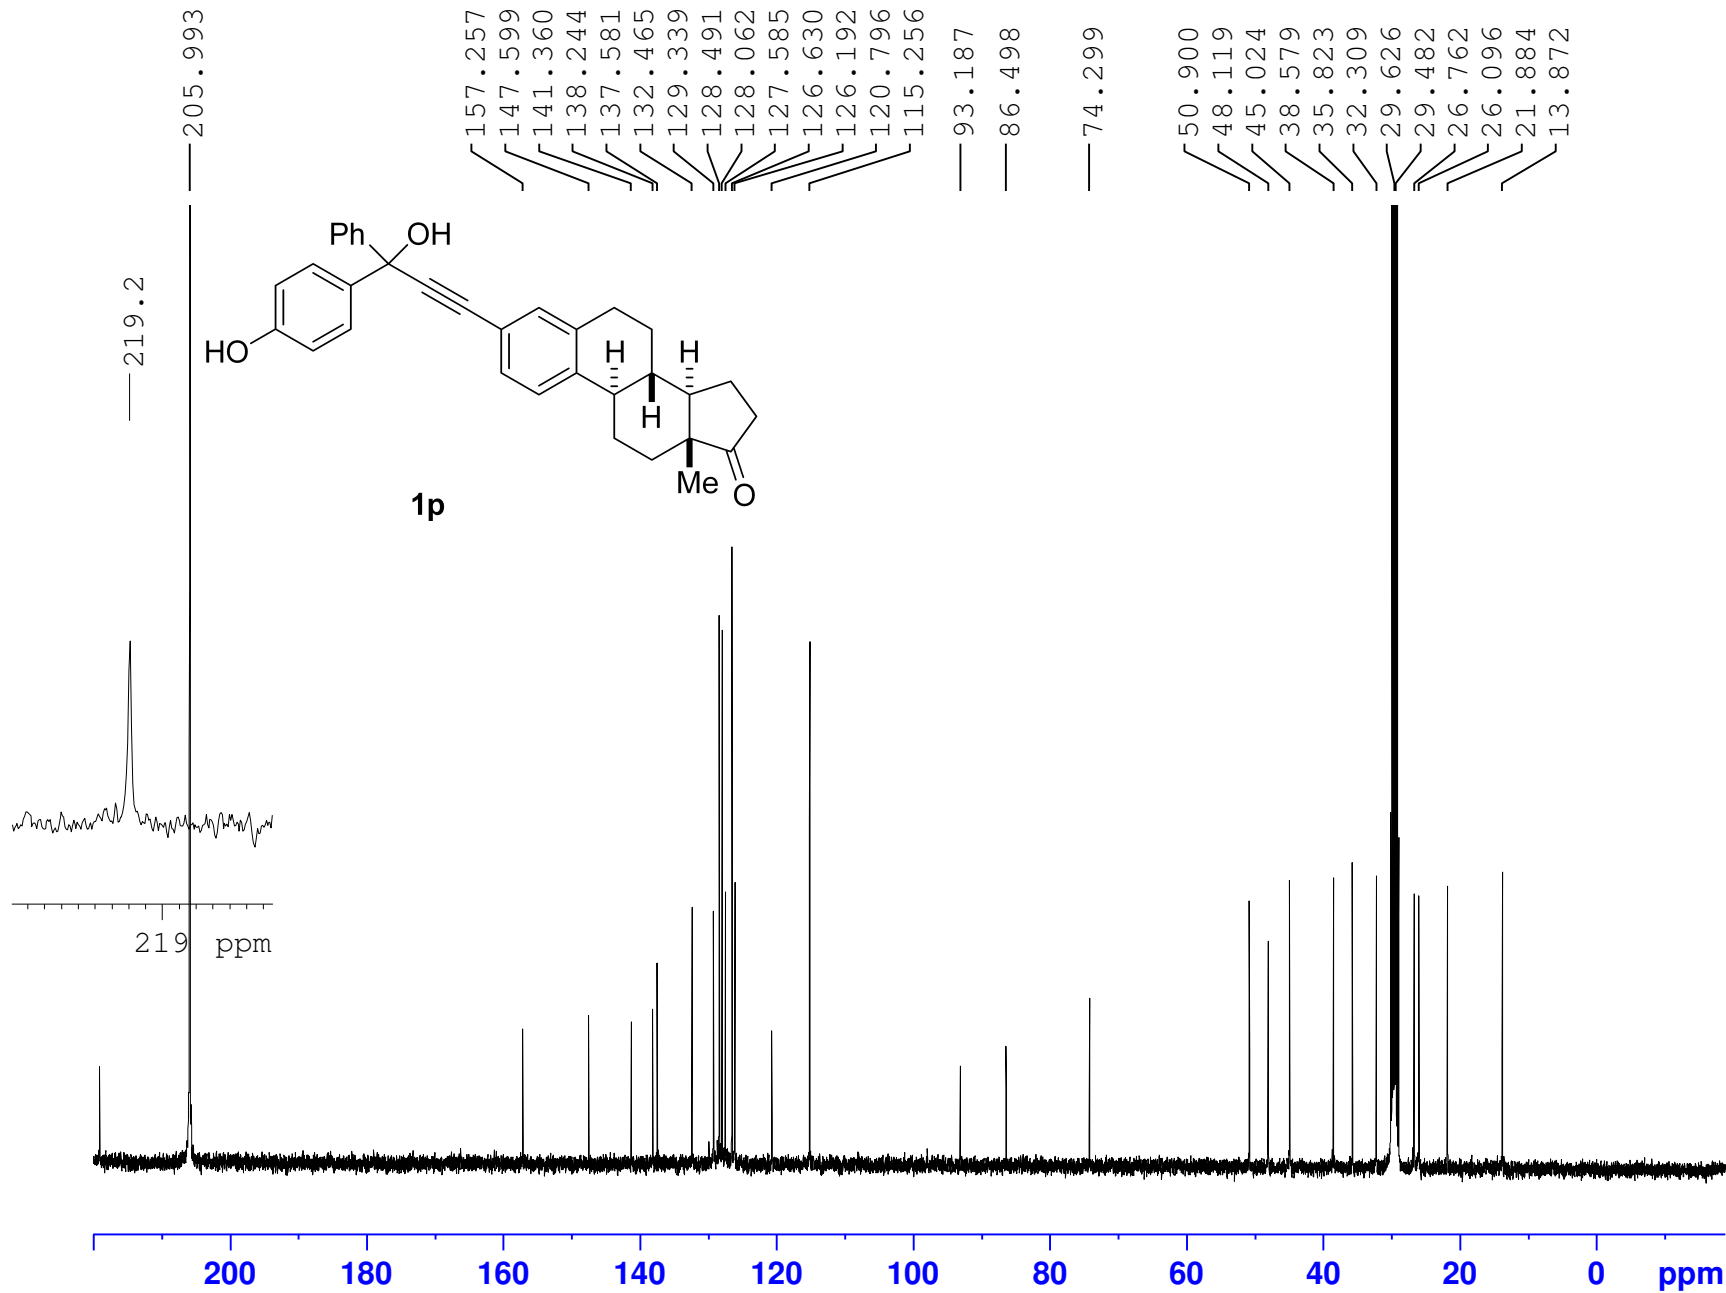

Current Data Parameters  
 NAME qdy-20110-2 C  
 EXPNO 3  
 PROCNO 1

F2 - Acquisition Parameters  
 Date\_ 20160415  
 Time 23.10  
 INSTRUM spect  
 PROBHD 5 mm PABBO BB/  
 PULPROG zgpg30  
 TD 65536  
 SOLVENT Acetone  
 NS 268  
 DS 0  
 SWH 24038.461 Hz  
 FIDRES 0.366798 Hz  
 AQ 1.3631488 sec  
 RG 196.92  
 DW 20.800 usec  
 DE 6.50 usec  
 TE 298.8 K  
 D1 2.00000000 sec  
 D11 0.03000000 sec  
 TD0 1

==== CHANNEL f1 =====  
 SFO1 100.6228298 MHz  
 NUC1 13C  
 P1 9.70 usec  
 PLW1 46.98899841 W

==== CHANNEL f2 =====  
 SFO2 400.1316005 MHz  
 NUC2 1H  
 CPDPRG[2] waltz16  
 PCPD2 90.00 usec  
 PLW2 11.99499989 W  
 PLW12 0.34213999 W  
 PLW13 0.27713001 W

F2 - Processing parameters  
 SI 32768  
 SF 100.6127042 MHz  
 WDW EM  
 SSB 0  
 LB 1.00 Hz  
 GB 0  
 PC 1.40

Supplementary Figure 36. <sup>13</sup>C NMR spectrum for 1p

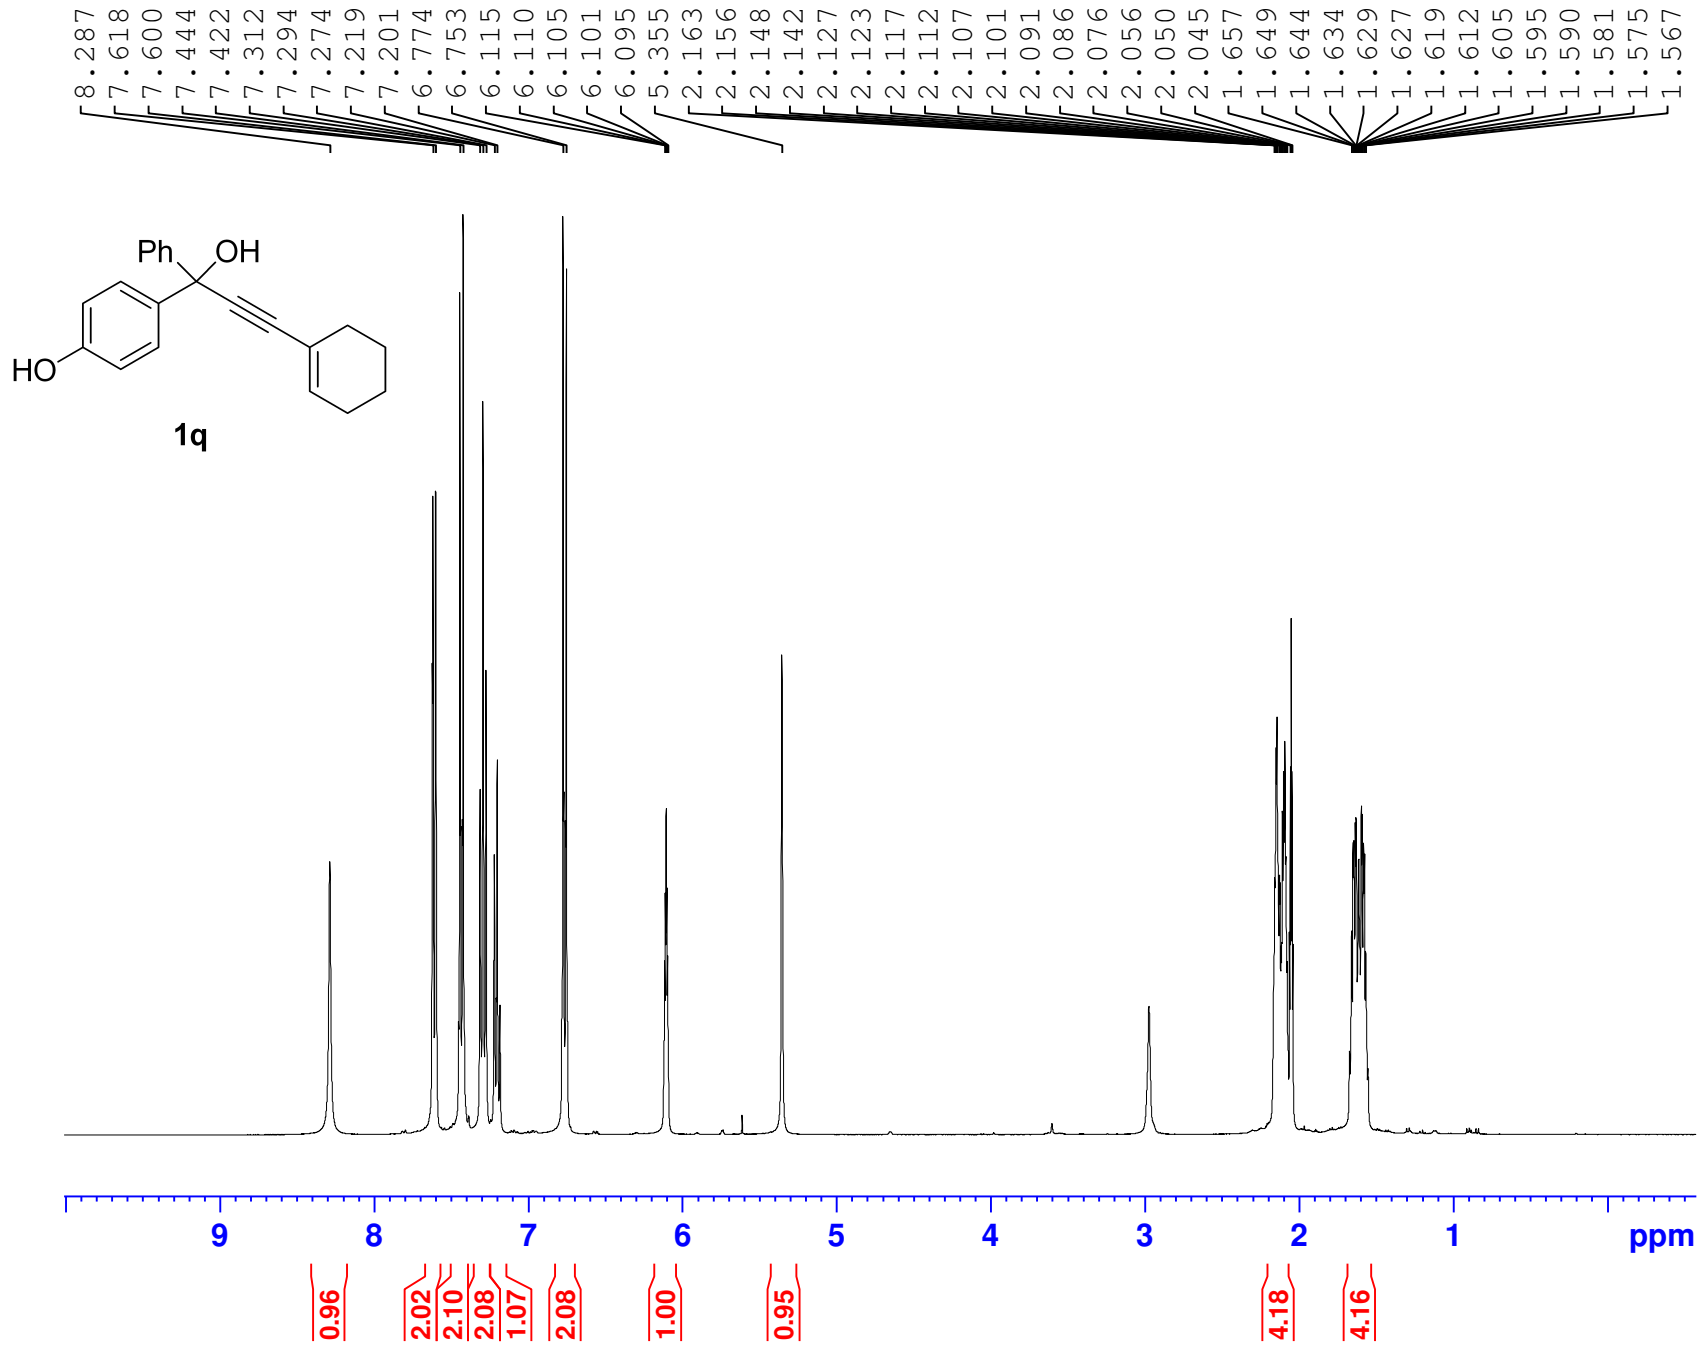

Current Data Parameters  
 NAME qdy-20018 C  
 EXPNO 2  
 PROCNO 1

F2 - Acquisition Parameters  
 Date\_ 20160328  
 Time 16.34  
 INSTRUM spect  
 PROBHD 5 mm PABBO BB/  
 PULPROG zg30  
 TD 65536  
 SOLVENT Acetone  
 NS 16  
 DS 0  
 SWH 8012.820 Hz  
 FIDRES 0.122266 Hz  
 AQ 4.0894465 sec  
 RG 70.97  
 DW 62.400 usec  
 DE 6.50 usec  
 TE 296.8 K  
 D1 1.00000000 sec  
 TD0 1

==== CHANNEL f1 =====  
 SFO1 400.1324710 MHz  
 NUC1 1H  
 P1 14.50 usec  
 PLW1 11.99499989 W

F2 - Processing parameters  
 SI 65536  
 SF 400.1300066 MHz  
 WDW EM  
 SSB 0  
 LB 0.30 Hz  
 GB 0  
 PC 1.00

Supplementary Figure 37. <sup>1</sup>H NMR spectrum for **1q**

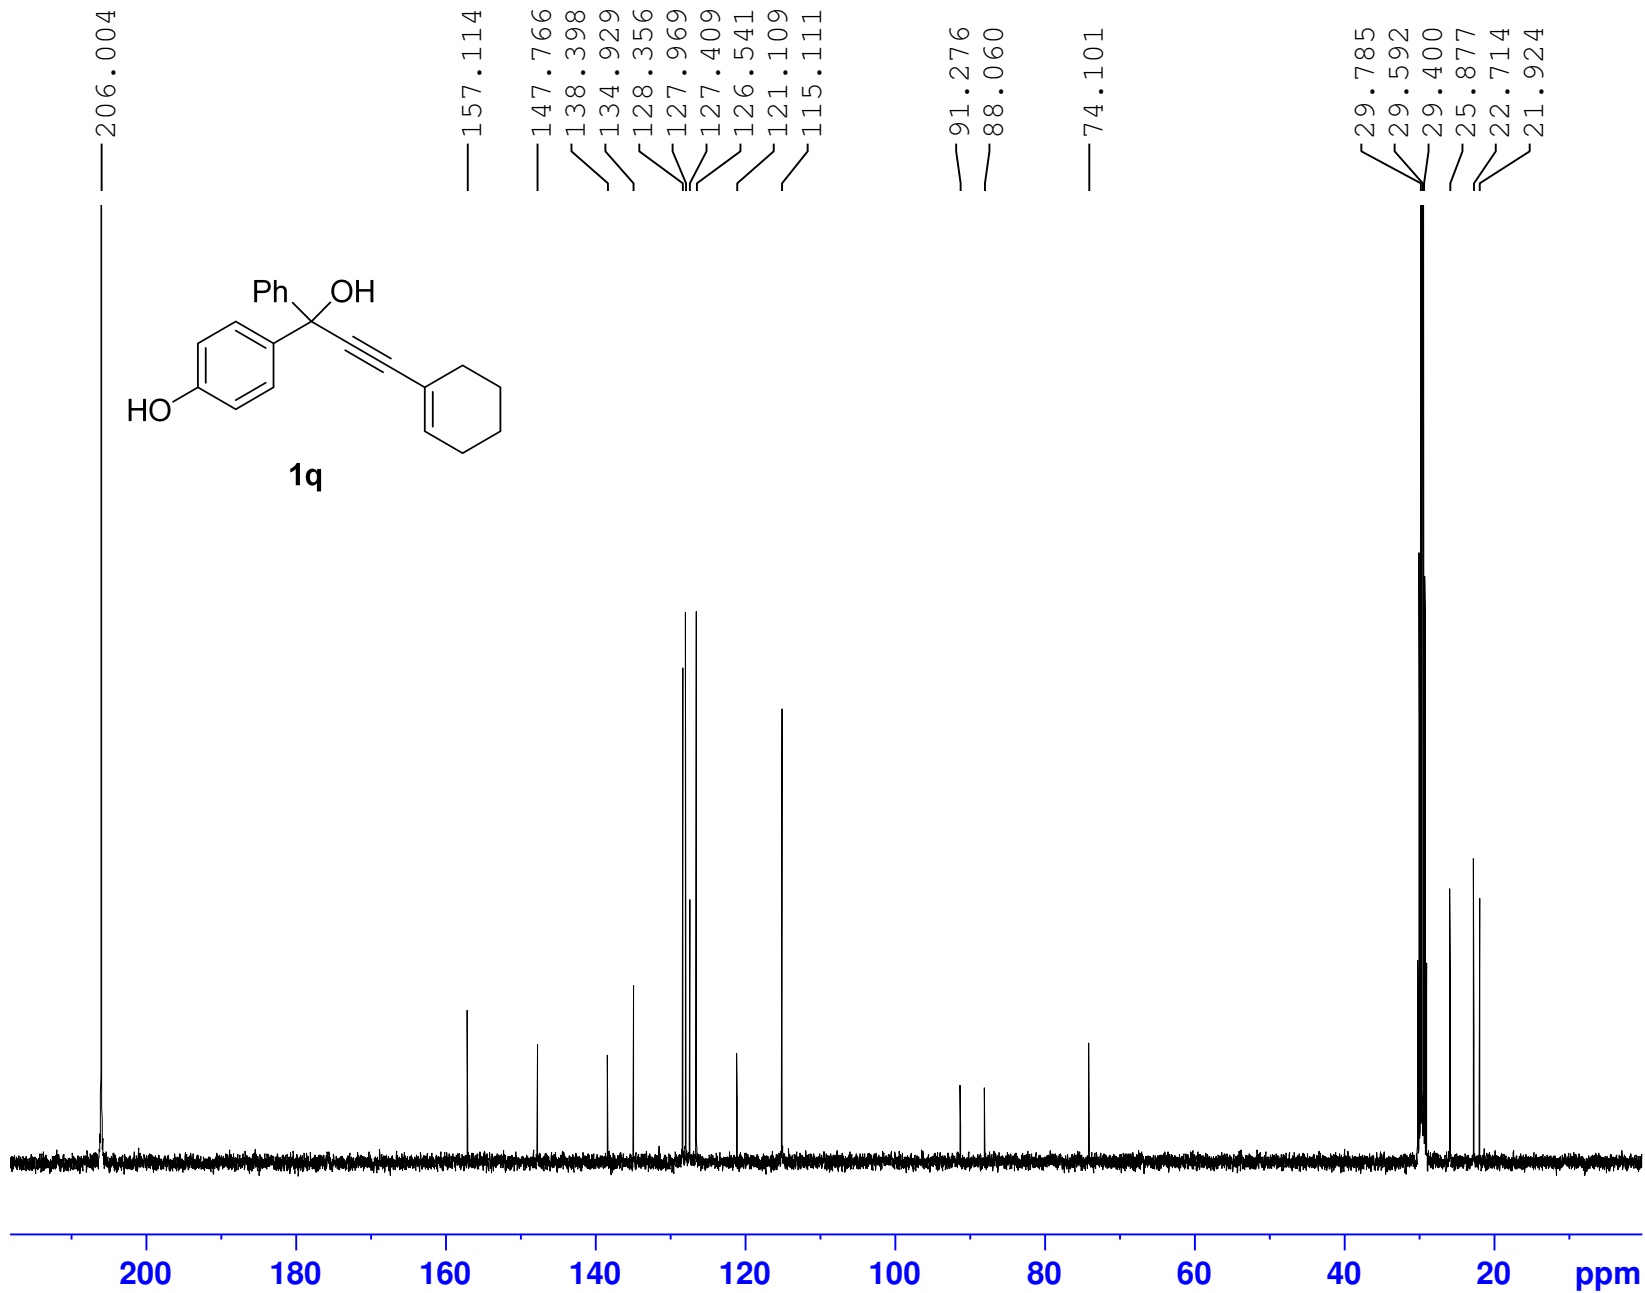

Current Data Parameters  
 NAME qdy-10181 H  
 EXPNO 2  
 PROCNO 1

F2 - Acquisition Parameters  
 Date\_ 20160328  
 Time 16.28  
 INSTRUM spect  
 PROBHD 5 mm PABBO BB/  
 PULPROG zgpg30  
 TD 65536  
 SOLVENT Acetone  
 NS 84  
 DS 0  
 SWH 24038.461 Hz  
 FIDRES 0.366798 Hz  
 AQ 1.3631488 sec  
 RG 196.92  
 DW 20.800 usec  
 DE 6.50 usec  
 TE 297.3 K  
 D1 2.00000000 sec  
 D11 0.03000000 sec  
 TD0 1

==== CHANNEL f1 =====  
 SFO1 100.6228298 MHz  
 NUC1 13C  
 P1 9.70 usec  
 PLW1 46.98899841 W

==== CHANNEL f2 =====  
 SFO2 400.1316005 MHz  
 NUC2 1H  
 CPDPRG[2] waltz16  
 PCPD2 90.00 usec  
 PLW2 11.99499989 W  
 PLW12 0.34213999 W  
 PLW13 0.27713001 W

F2 - Processing parameters  
 SI 32768  
 SF 100.6127072 MHz  
 WDW EM  
 SSB 0  
 LB 1.00 Hz  
 GB 0  
 PC 1.40

Supplementary Figure 38. <sup>13</sup>C NMR spectrum for 1q

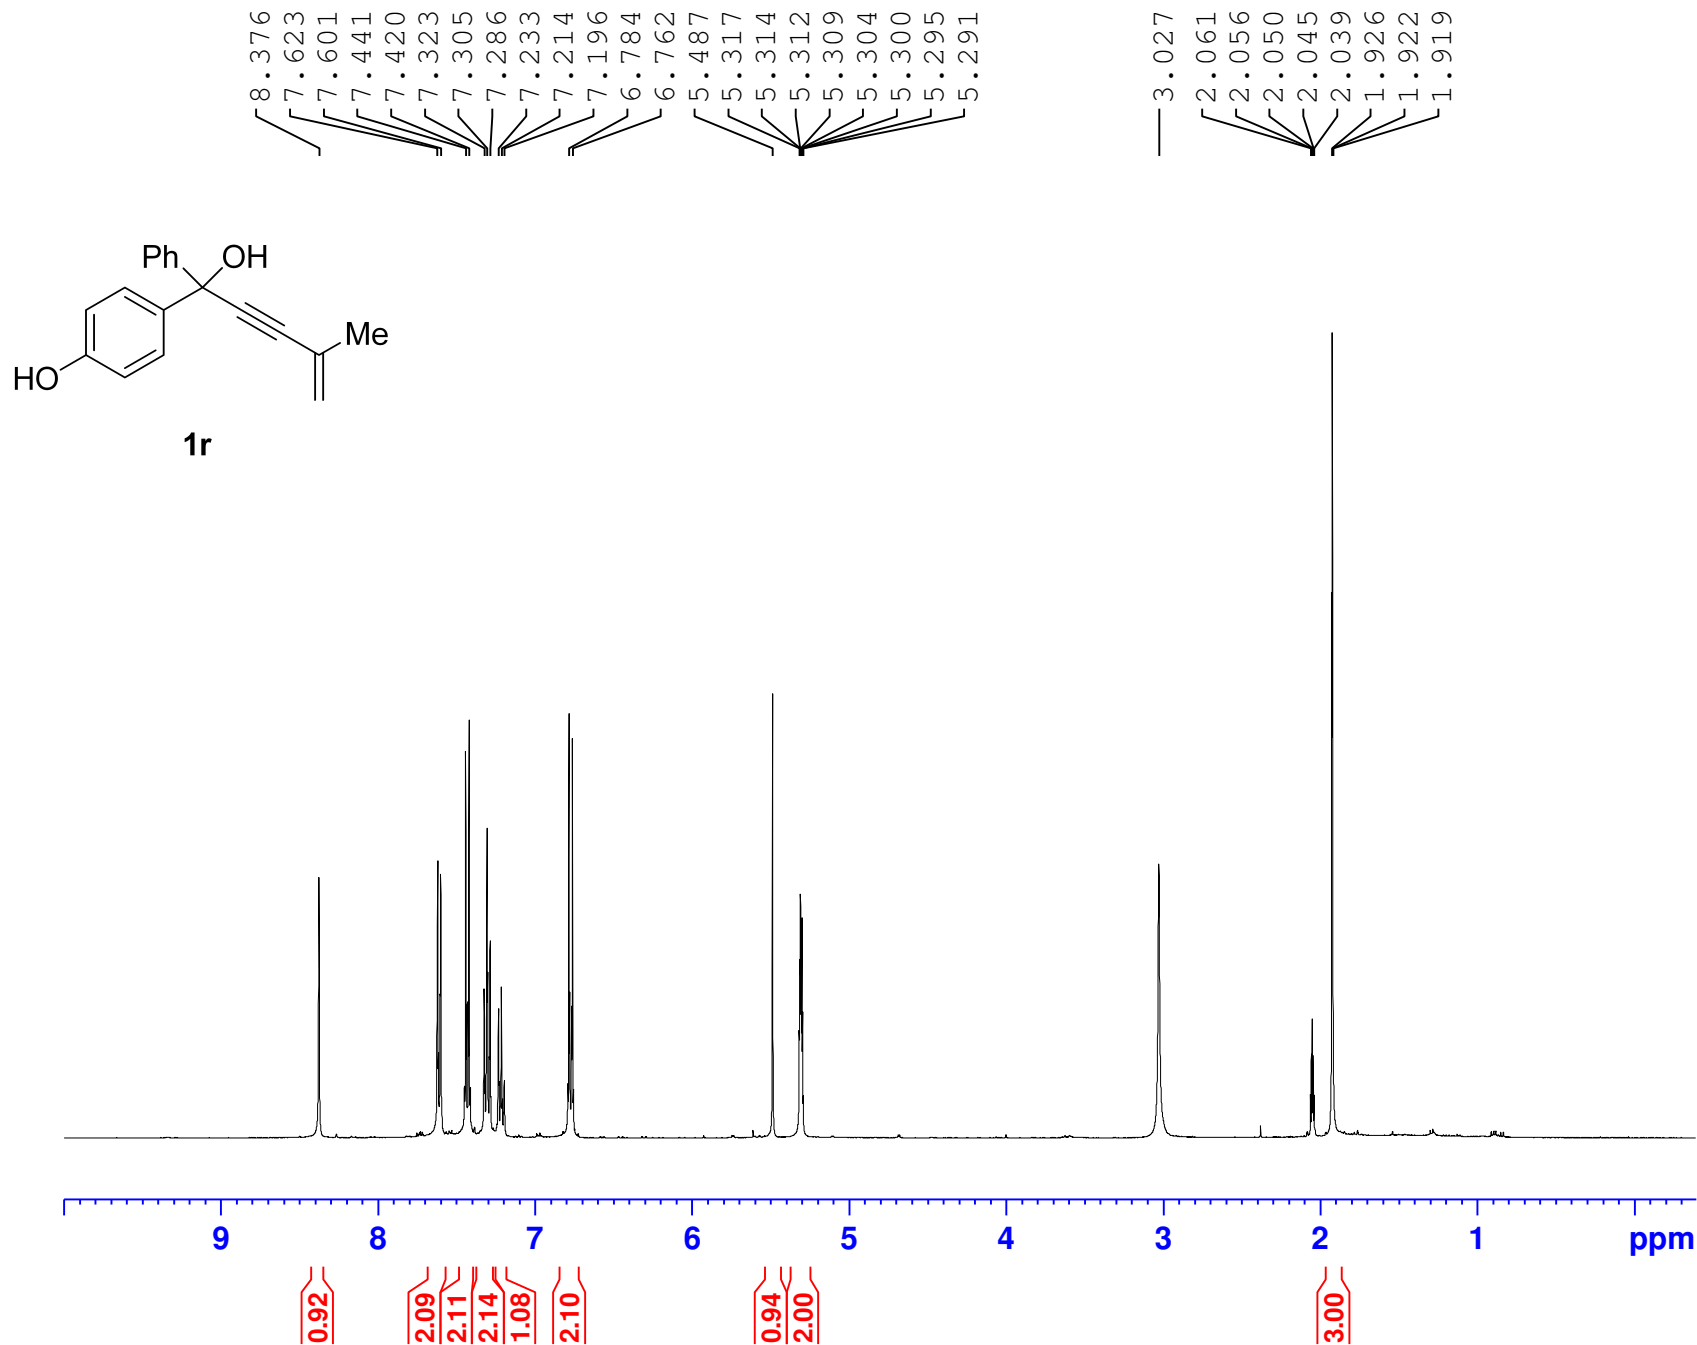

Current Data Parameters  
 NAME qdy-20063 H  
 EXPNO 2  
 PROCNO 1

F2 - Acquisition Parameters  
 Date\_ 20160310  
 Time 20.01  
 INSTRUM spect  
 PROBHD 5 mm PABBO BB/  
 PULPROG zg30  
 TD 65536  
 SOLVENT Acetone  
 NS 5  
 DS 0  
 SWH 8012.820 Hz  
 FIDRES 0.122266 Hz  
 AQ 4.0894465 sec  
 RG 88.84  
 DW 62.400 usec  
 DE 6.50 usec  
 TE 296.9 K  
 D1 1.00000000 sec  
 TD0 1

===== CHANNEL f1 =====  
 SFO1 400.1324710 MHz  
 NUC1 1H  
 P1 14.50 usec  
 PLW1 11.99499989 W

F2 - Processing parameters  
 SI 65536  
 SF 400.1300067 MHz  
 WDW EM  
 SSB 0  
 LB 0.30 Hz  
 GB 0  
 PC 1.00

Supplementary Figure 39. <sup>1</sup>H NMR spectrum for **1r**

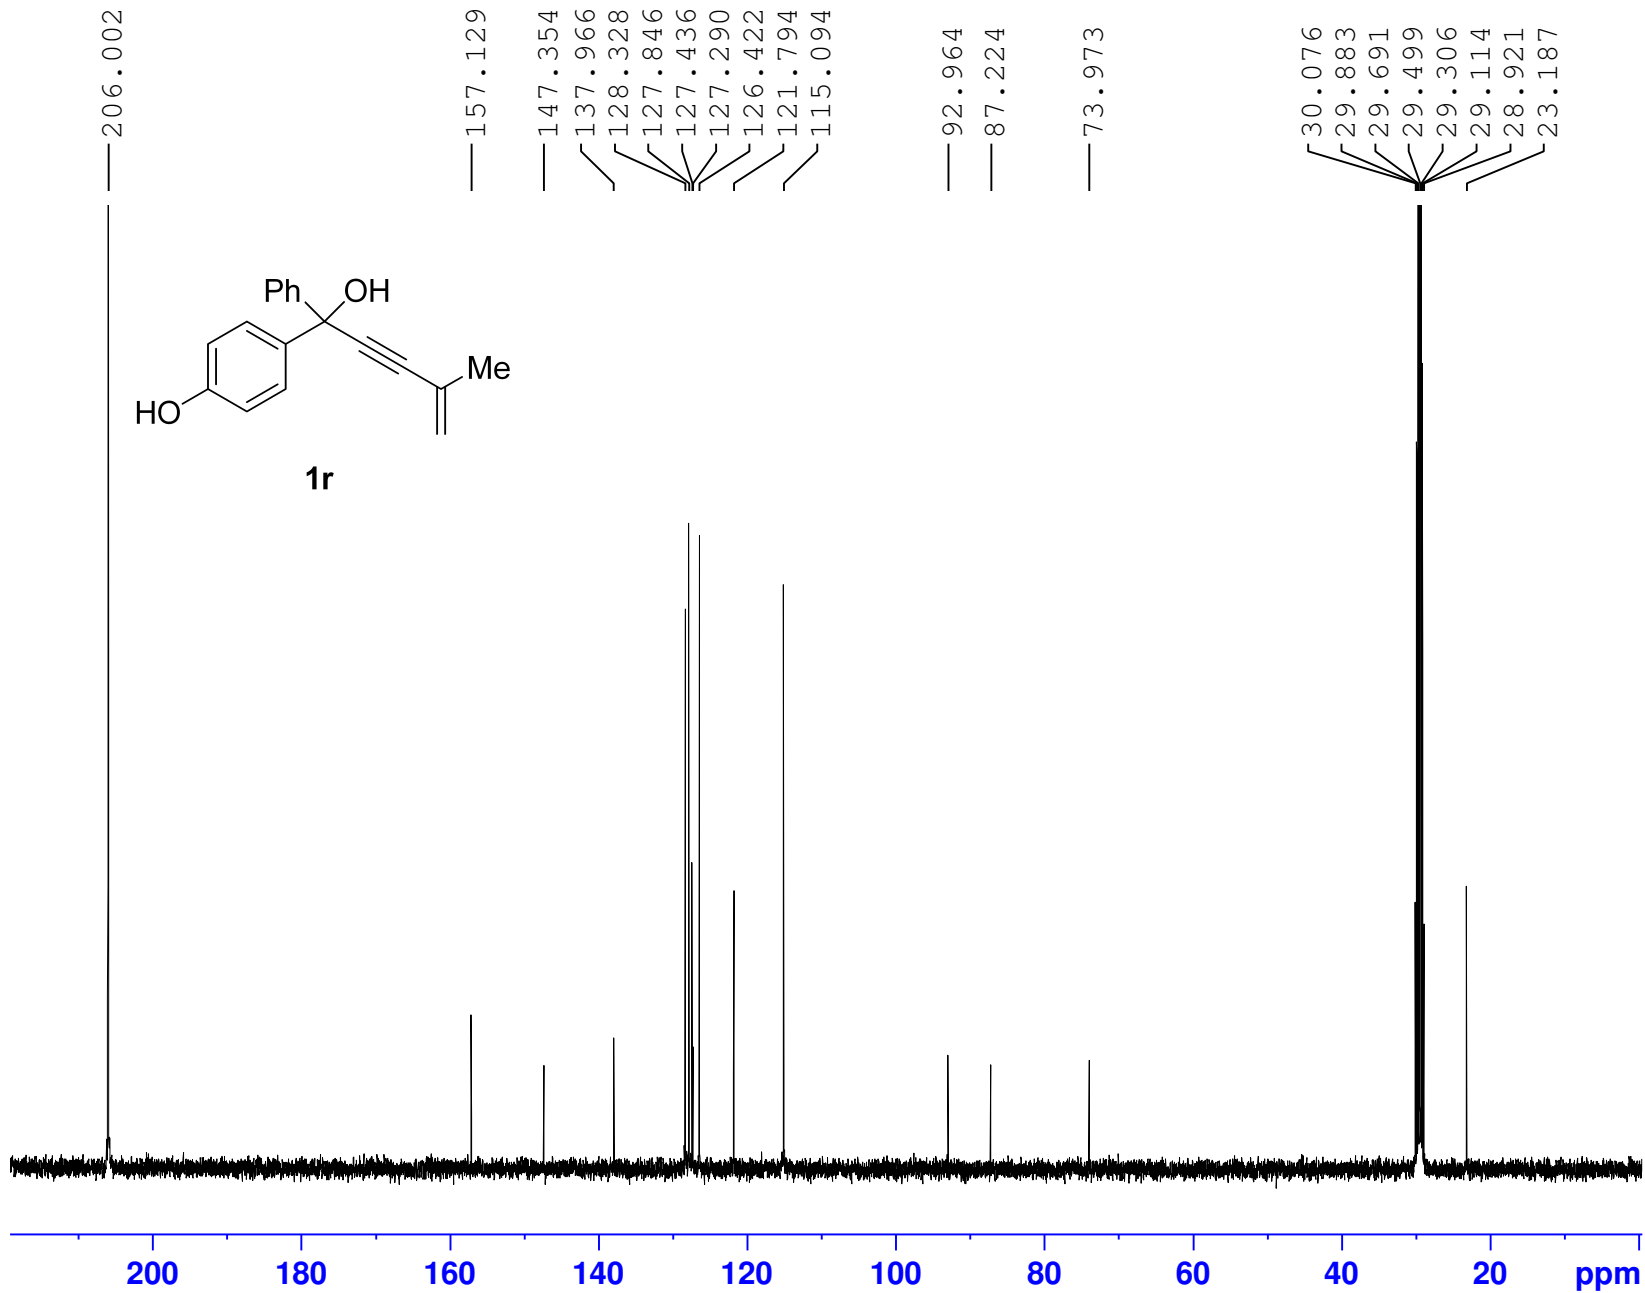

Current Data Parameters  
 NAME qdy-20063 C  
 EXPNO 2  
 PROCNO 1

F2 - Acquisition Parameters  
 Date\_ 20160310  
 Time 19.53  
 INSTRUM spect  
 PROBHD 5 mm PABBO BB/  
 PULPROG zgpg30  
 TD 65536  
 SOLVENT Acetone  
 NS 143  
 DS 0  
 SWH 24038.461 Hz  
 FIDRES 0.366798 Hz  
 AQ 1.3631488 sec  
 RG 196.92  
 DW 20.800 usec  
 DE 6.50 usec  
 TE 297.6 K  
 D1 2.00000000 sec  
 D11 0.03000000 sec  
 TD0 1

==== CHANNEL f1 =====  
 SFO1 100.6228298 MHz  
 NUC1 13C  
 P1 9.70 usec  
 PLW1 46.98899841 W

==== CHANNEL f2 =====  
 SFO2 400.1316005 MHz  
 NUC2 1H  
 CPDPRG[2] waltz16  
 PCPD2 90.00 usec  
 PLW2 11.99499989 W  
 PLW12 0.34213999 W  
 PLW13 0.27713001 W

F2 - Processing parameters  
 SI 32768  
 SF 100.6127169 MHz  
 WDW EM  
 SSB 0  
 LB 1.00 Hz  
 GB 0  
 PC 1.40

Supplementary Figure 40. <sup>13</sup>C NMR spectrum for **1r**

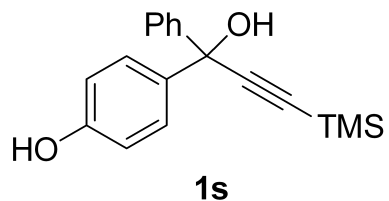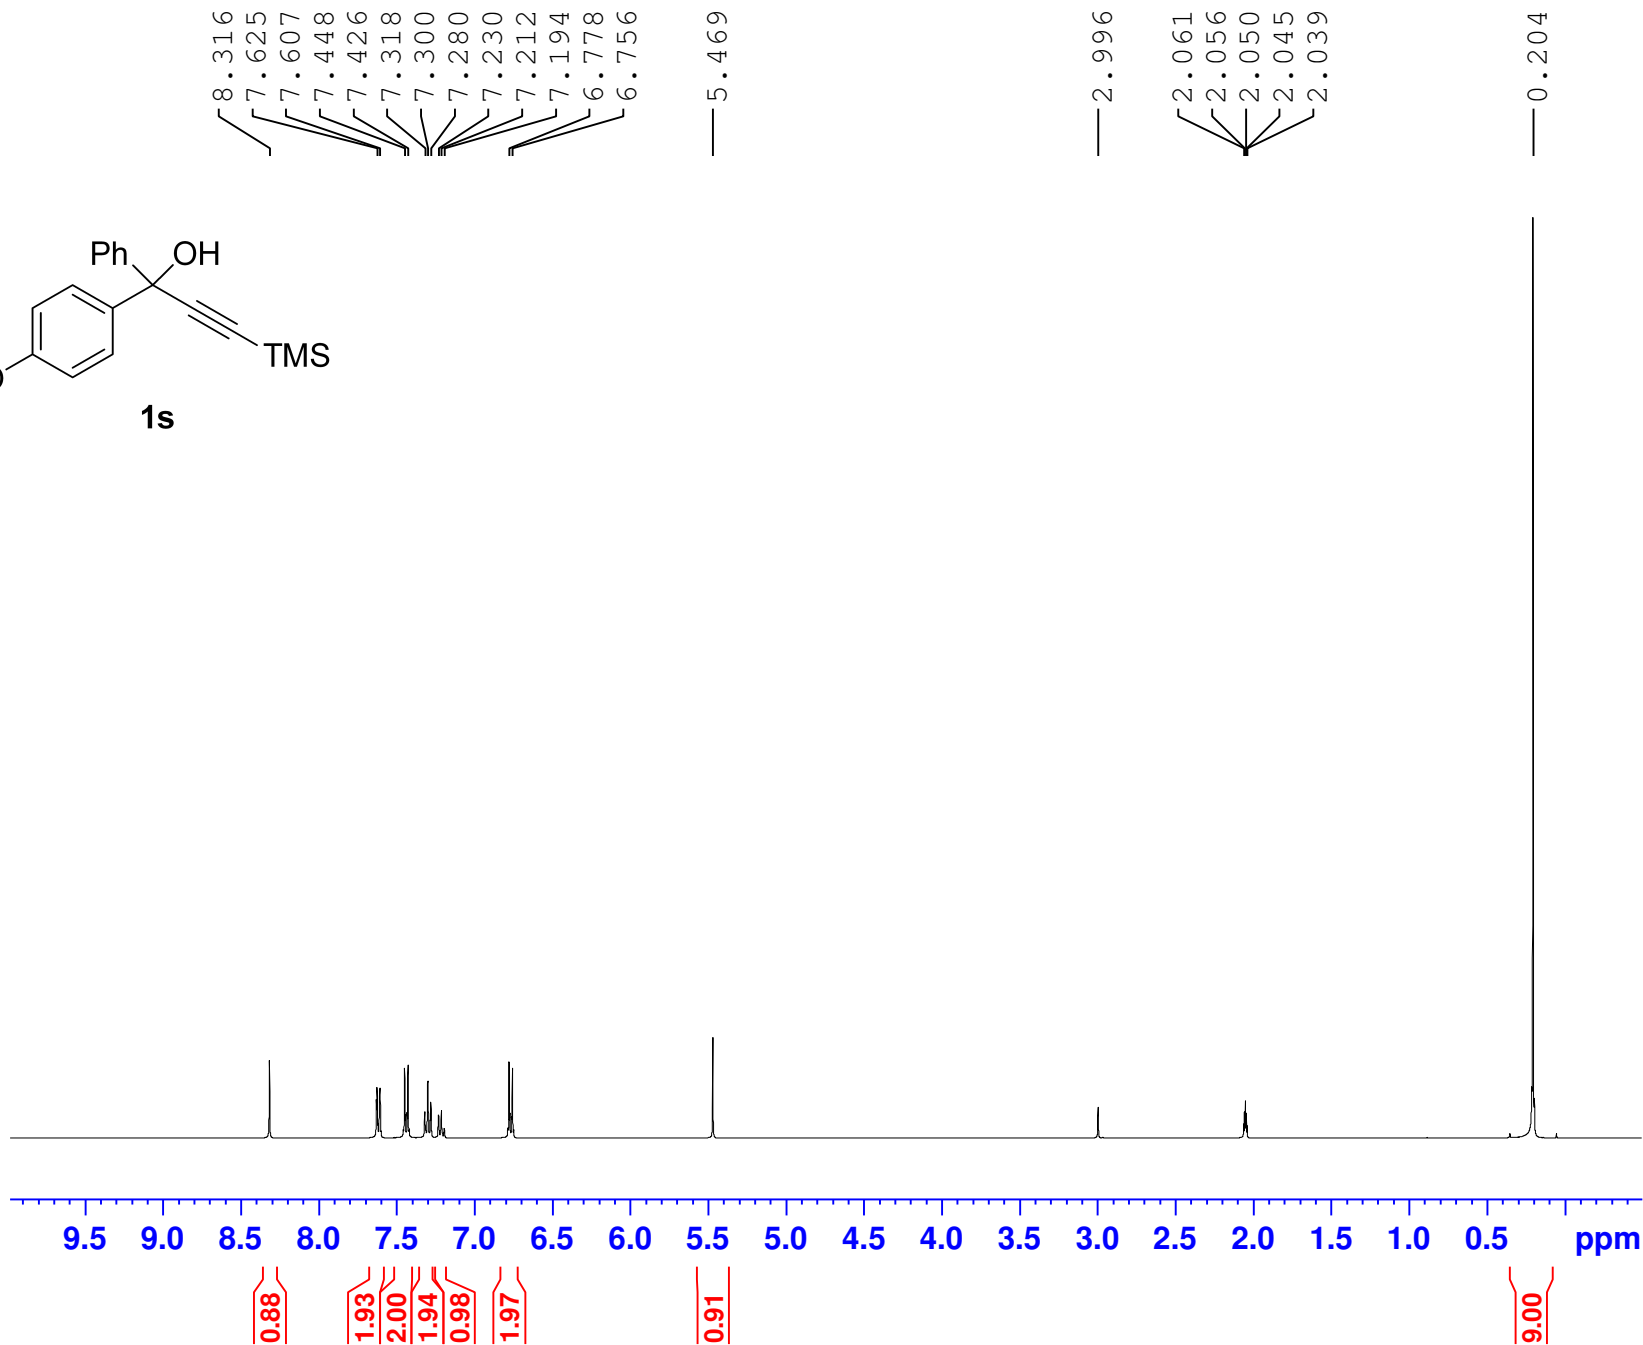

Current Data Parameters  
 NAME qdy-20016 H  
 EXPNO 3  
 PROCNO 1

F2 - Acquisition Parameters  
 Date\_ 20160328  
 Time 16.38  
 INSTRUM spect  
 PROBHD 5 mm PABBO BB/  
 PULPROG zg30  
 TD 65536  
 SOLVENT Acetone  
 NS 7  
 DS 0  
 SWH 8012.820 Hz  
 FIDRES 0.122266 Hz  
 AQ 4.0894465 sec  
 RG 49.32  
 DW 62.400 usec  
 DE 6.50 usec  
 TE 296.6 K  
 D1 1.00000000 sec  
 TD0 1

==== CHANNEL f1 =====  
 SFO1 400.1324710 MHz  
 NUC1 1H  
 P1 14.50 usec  
 PLW1 11.99499989 W

F2 - Processing parameters  
 SI 65536  
 SF 400.1300066 MHz  
 WDW EM  
 SSB 0  
 LB 0.30 Hz  
 GB 0  
 PC 1.00

**Supplementary Figure 41. <sup>1</sup>H NMR spectrum for 1s**

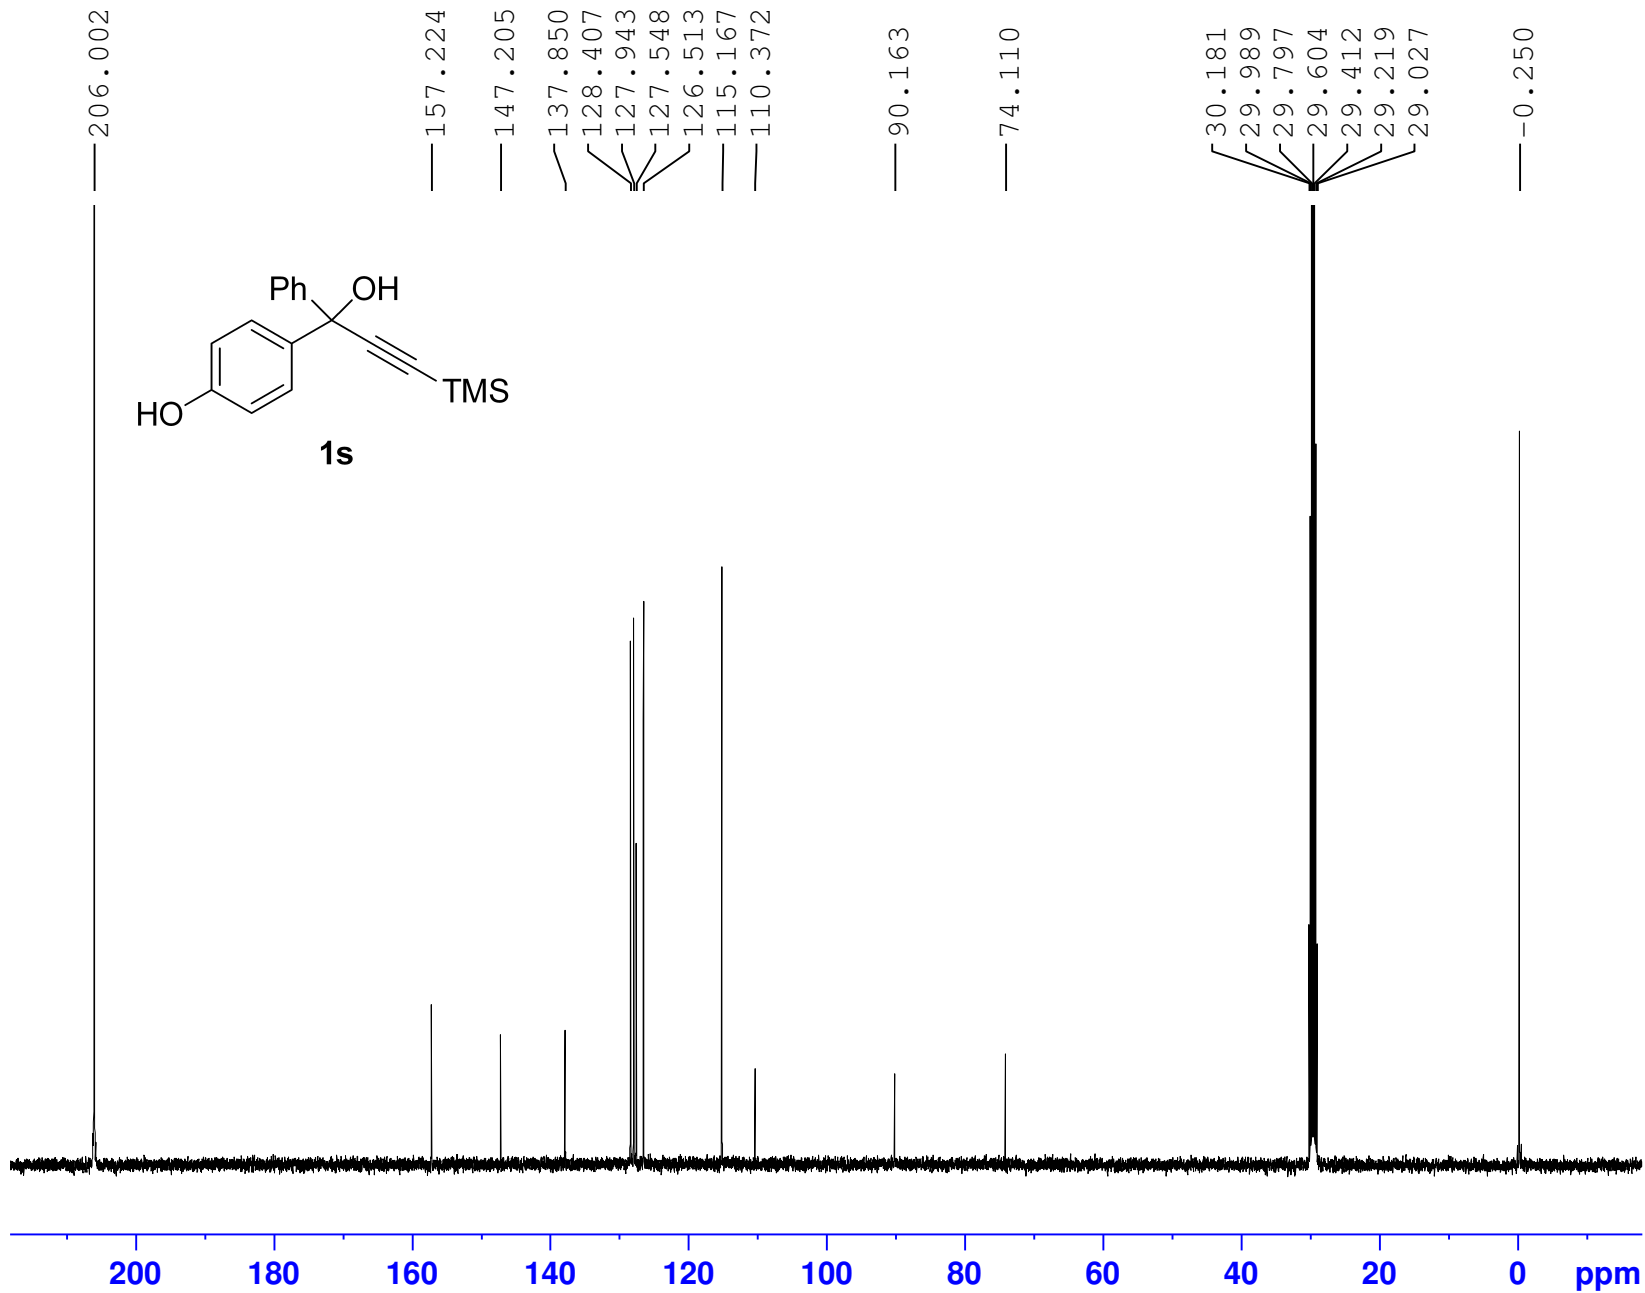

Current Data Parameters  
 NAME qdy-20016 C  
 EXPNO 3  
 PROCNO 1

F2 - Acquisition Parameters  
 Date\_ 20160328  
 Time 19.58  
 INSTRUM spect  
 PROBHD 5 mm PABBO BB/  
 PULPROG zgpg30  
 TD 65536  
 SOLVENT Acetone  
 NS 119  
 DS 0  
 SWH 24038.461 Hz  
 FIDRES 0.366798 Hz  
 AQ 1.3631488 sec  
 RG 196.92  
 DW 20.800 usec  
 DE 6.50 usec  
 TE 298.3 K  
 D1 2.00000000 sec  
 D11 0.03000000 sec  
 TD0 1

==== CHANNEL f1 =====  
 SFO1 100.6228298 MHz  
 NUC1 13C  
 P1 9.70 usec  
 PLW1 46.98899841 W

==== CHANNEL f2 =====  
 SFO2 400.1316005 MHz  
 NUC2 1H  
 CPDPRG[2] waltz16  
 PCPD2 90.00 usec  
 PLW2 11.99499989 W  
 PLW12 0.34213999 W  
 PLW13 0.27713001 W

F2 - Processing parameters  
 SI 32768  
 SF 100.6127064 MHz  
 WDW EM  
 SSB 0  
 LB 1.00 Hz  
 GB 0  
 PC 1.40

Supplementary Figure 42. <sup>13</sup>C NMR spectrum for **1s**

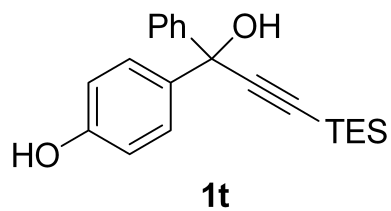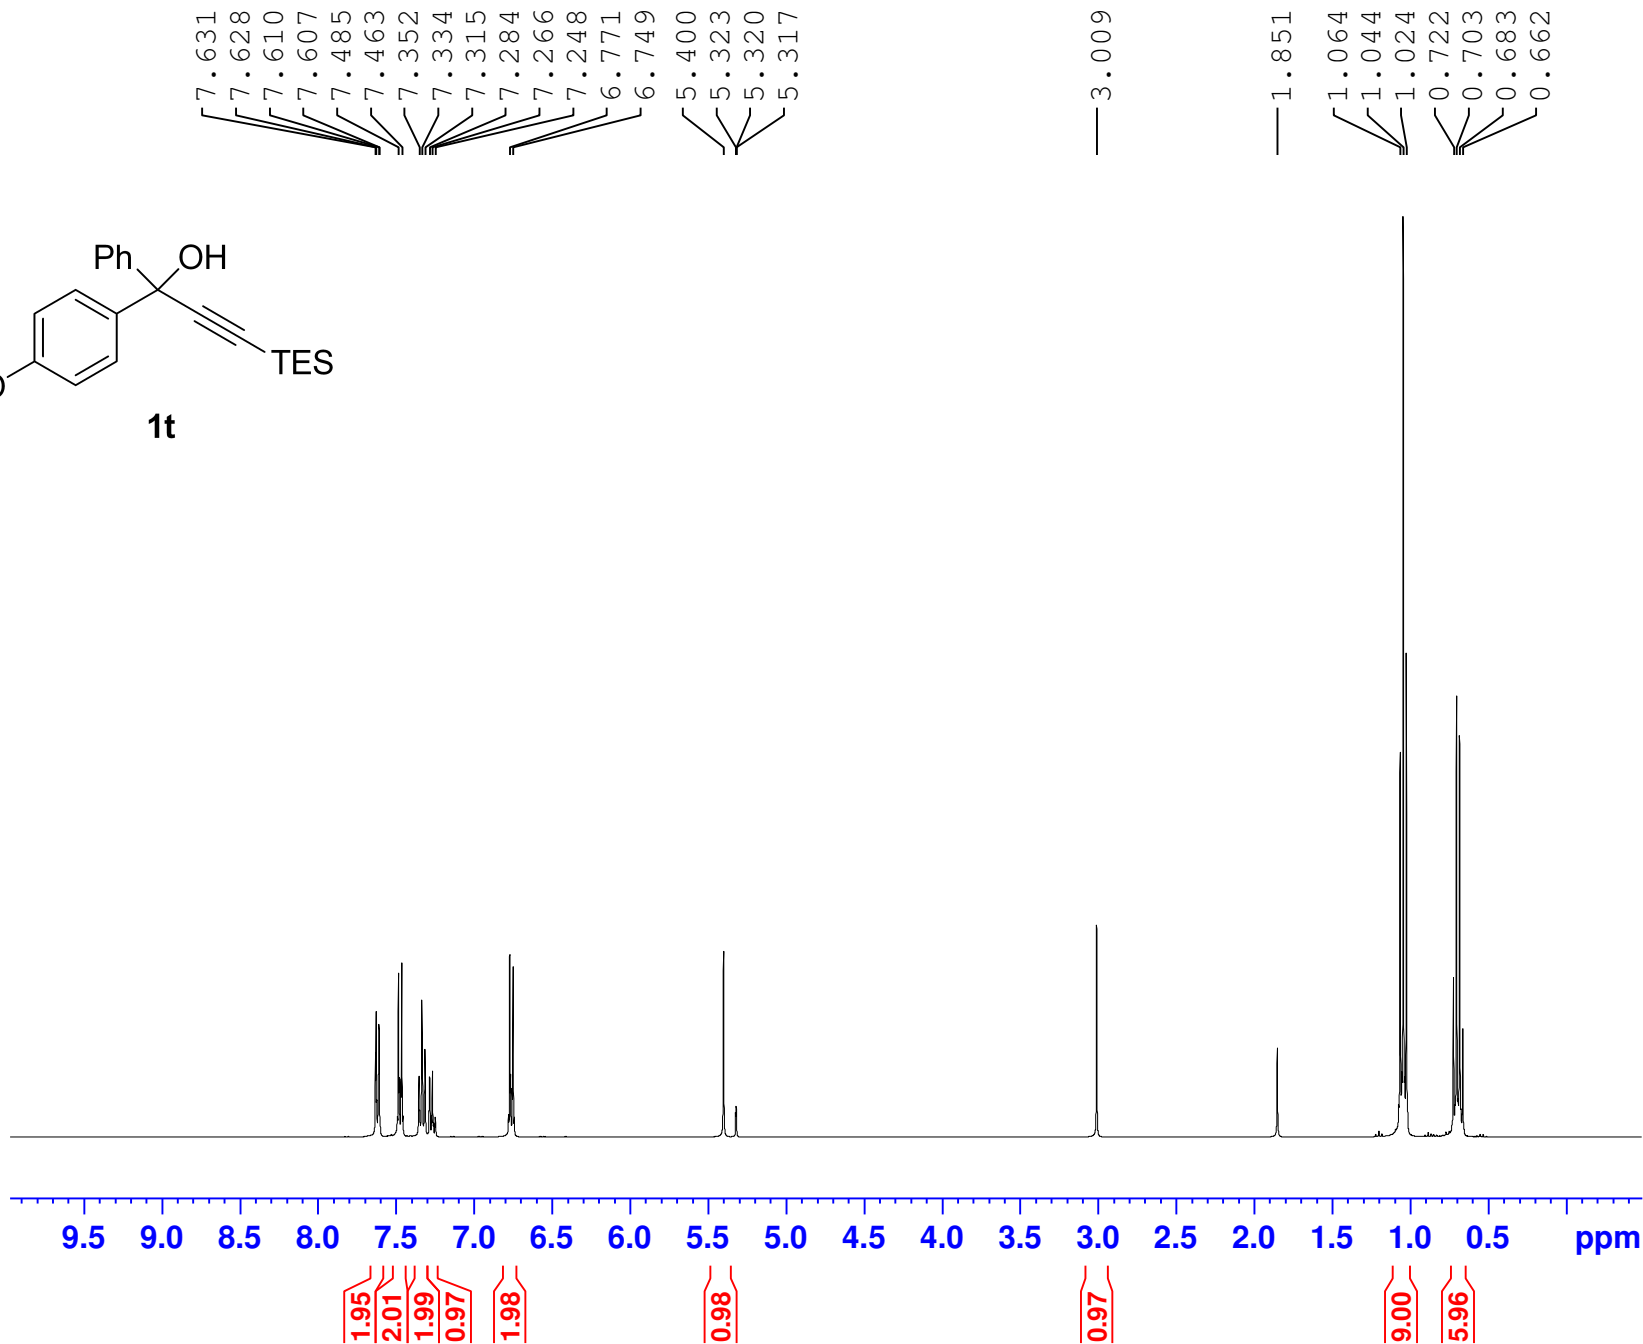

Current Data Parameters  
 NAME qdy-20085-2 H  
 EXPNO 1  
 PROCNO 1

F2 - Acquisition Parameters  
 Date\_ 20160319  
 Time 19.48  
 INSTRUM spect  
 PROBHD 5 mm PABBO BB/  
 PULPROG zg30  
 TD 65536  
 SOLVENT CD2C12  
 NS 14  
 DS 0  
 SWH 8012.820 Hz  
 FIDRES 0.122266 Hz  
 AQ 4.0894465 sec  
 RG 39.46  
 DW 62.400 usec  
 DE 6.50 usec  
 TE 297.9 K  
 D1 1.00000000 sec  
 TD0 1

==== CHANNEL f1 =====  
 SFO1 400.1324710 MHz  
 NUC1 1H  
 P1 14.50 usec  
 PLW1 11.99499989 W

F2 - Processing parameters  
 SI 65536  
 SF 400.1300152 MHz  
 WDW EM  
 SSB 0  
 LB 0.30 Hz  
 GB 0  
 PC 1.00

Supplementary Figure 43. <sup>1</sup>H NMR spectrum for 1t



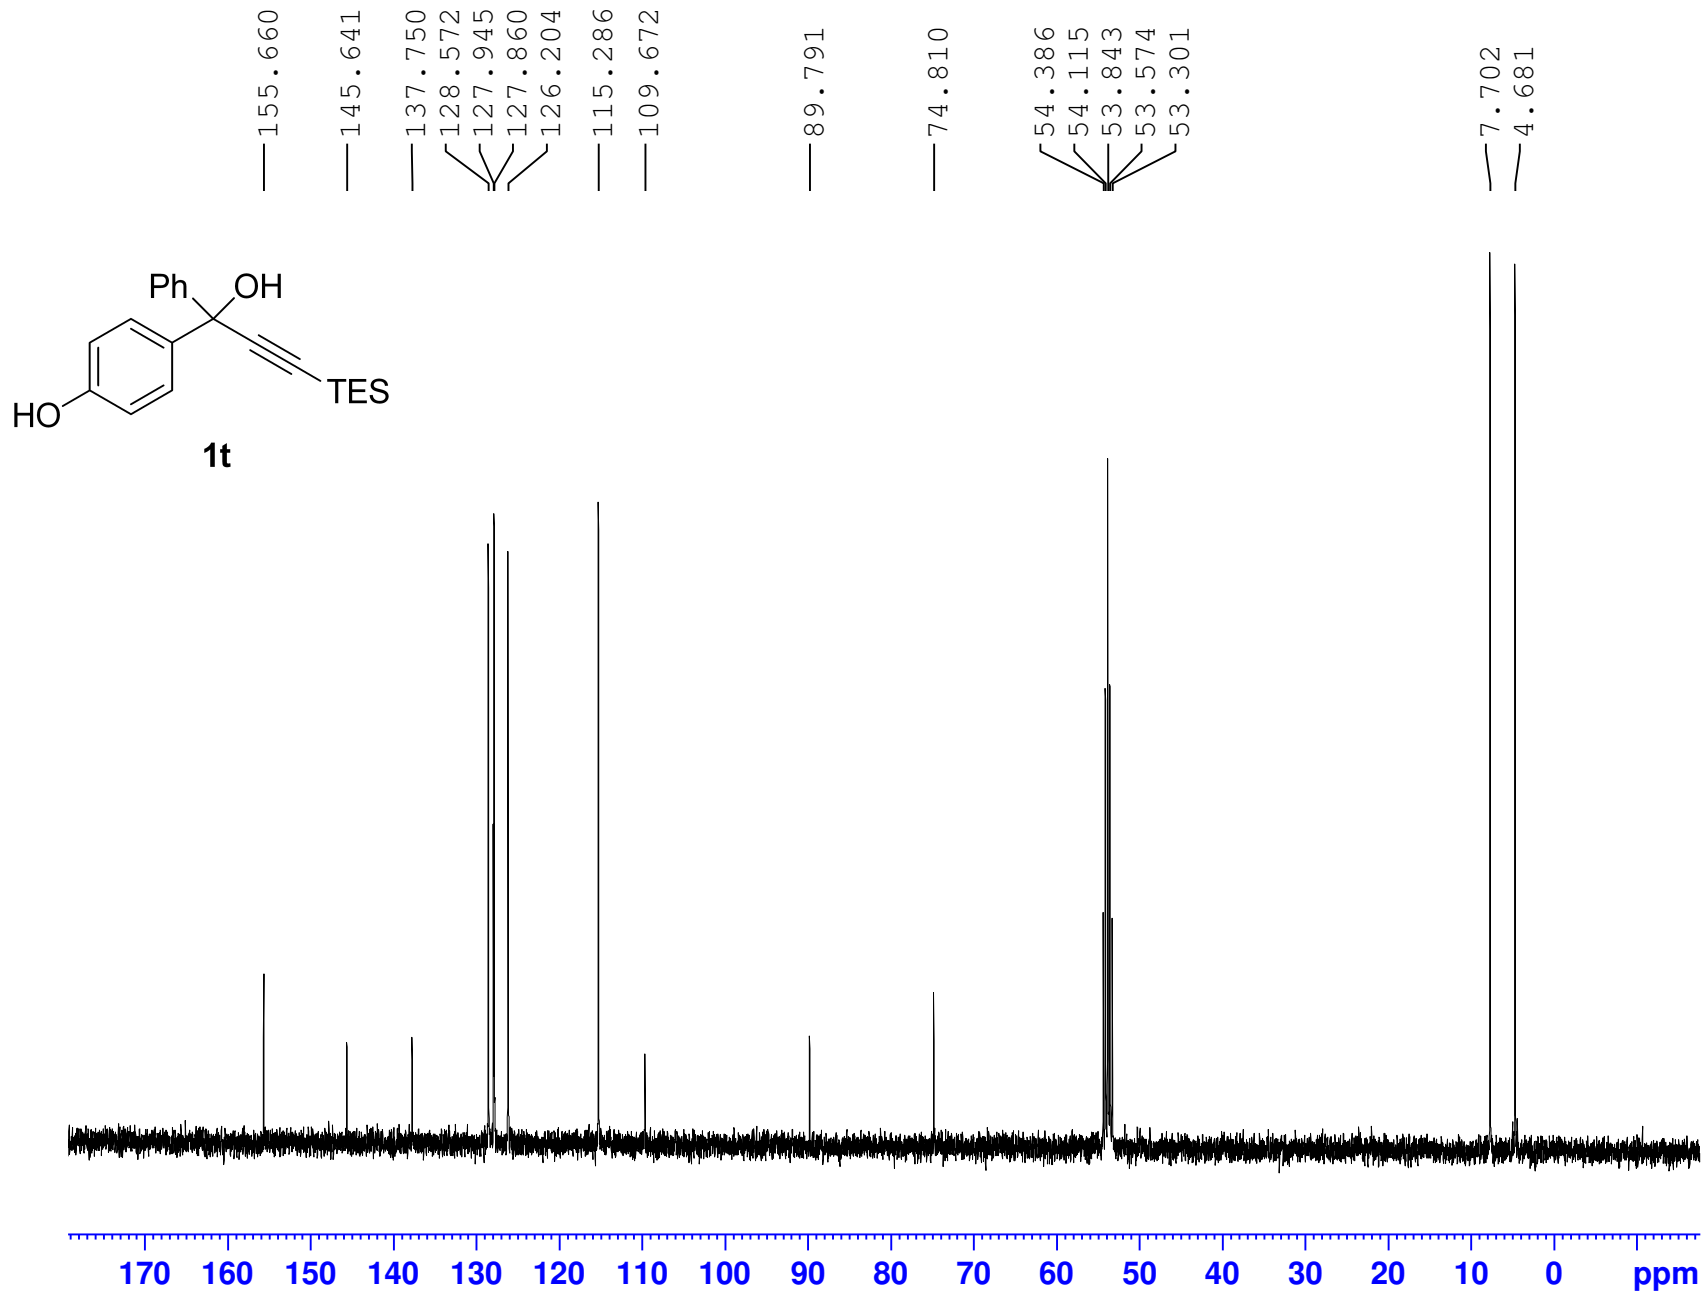

Current Data Parameters  
 NAME qdy-200885-2 C  
 EXPNO 1  
 PROCNO 1

F2 - Acquisition Parameters  
 Date\_ 20160318  
 Time 21.45  
 INSTRUM spect  
 PROBHD 5 mm PABBO BB/  
 PULPROG zgpg30  
 TD 65536  
 SOLVENT CD2C12  
 NS 98  
 DS 0  
 SWH 24038.461 Hz  
 FIDRES 0.366798 Hz  
 AQ 1.3631488 sec  
 RG 196.92  
 DW 20.800 usec  
 DE 6.50 usec  
 TE 298.0 K  
 D1 2.00000000 sec  
 D11 0.03000000 sec  
 TD0 1

==== CHANNEL f1 =====  
 SFO1 100.6228298 MHz  
 NUC1 13C  
 P1 9.70 usec  
 PLW1 46.98899841 W

==== CHANNEL f2 =====  
 SFO2 400.1316005 MHz  
 NUC2 1H  
 CPDPRG[2] waltz16  
 PCPD2 90.00 usec  
 PLW2 11.99499989 W  
 PLW12 0.34213999 W  
 PLW13 0.27713001 W

F2 - Processing parameters  
 SI 32768  
 SF 100.6127270 MHz  
 WDW EM  
 SSB 0  
 LB 1.00 Hz  
 GB 0  
 PC 1.40

Supplementary Figure 44. <sup>13</sup>C NMR spectrum for **1t**

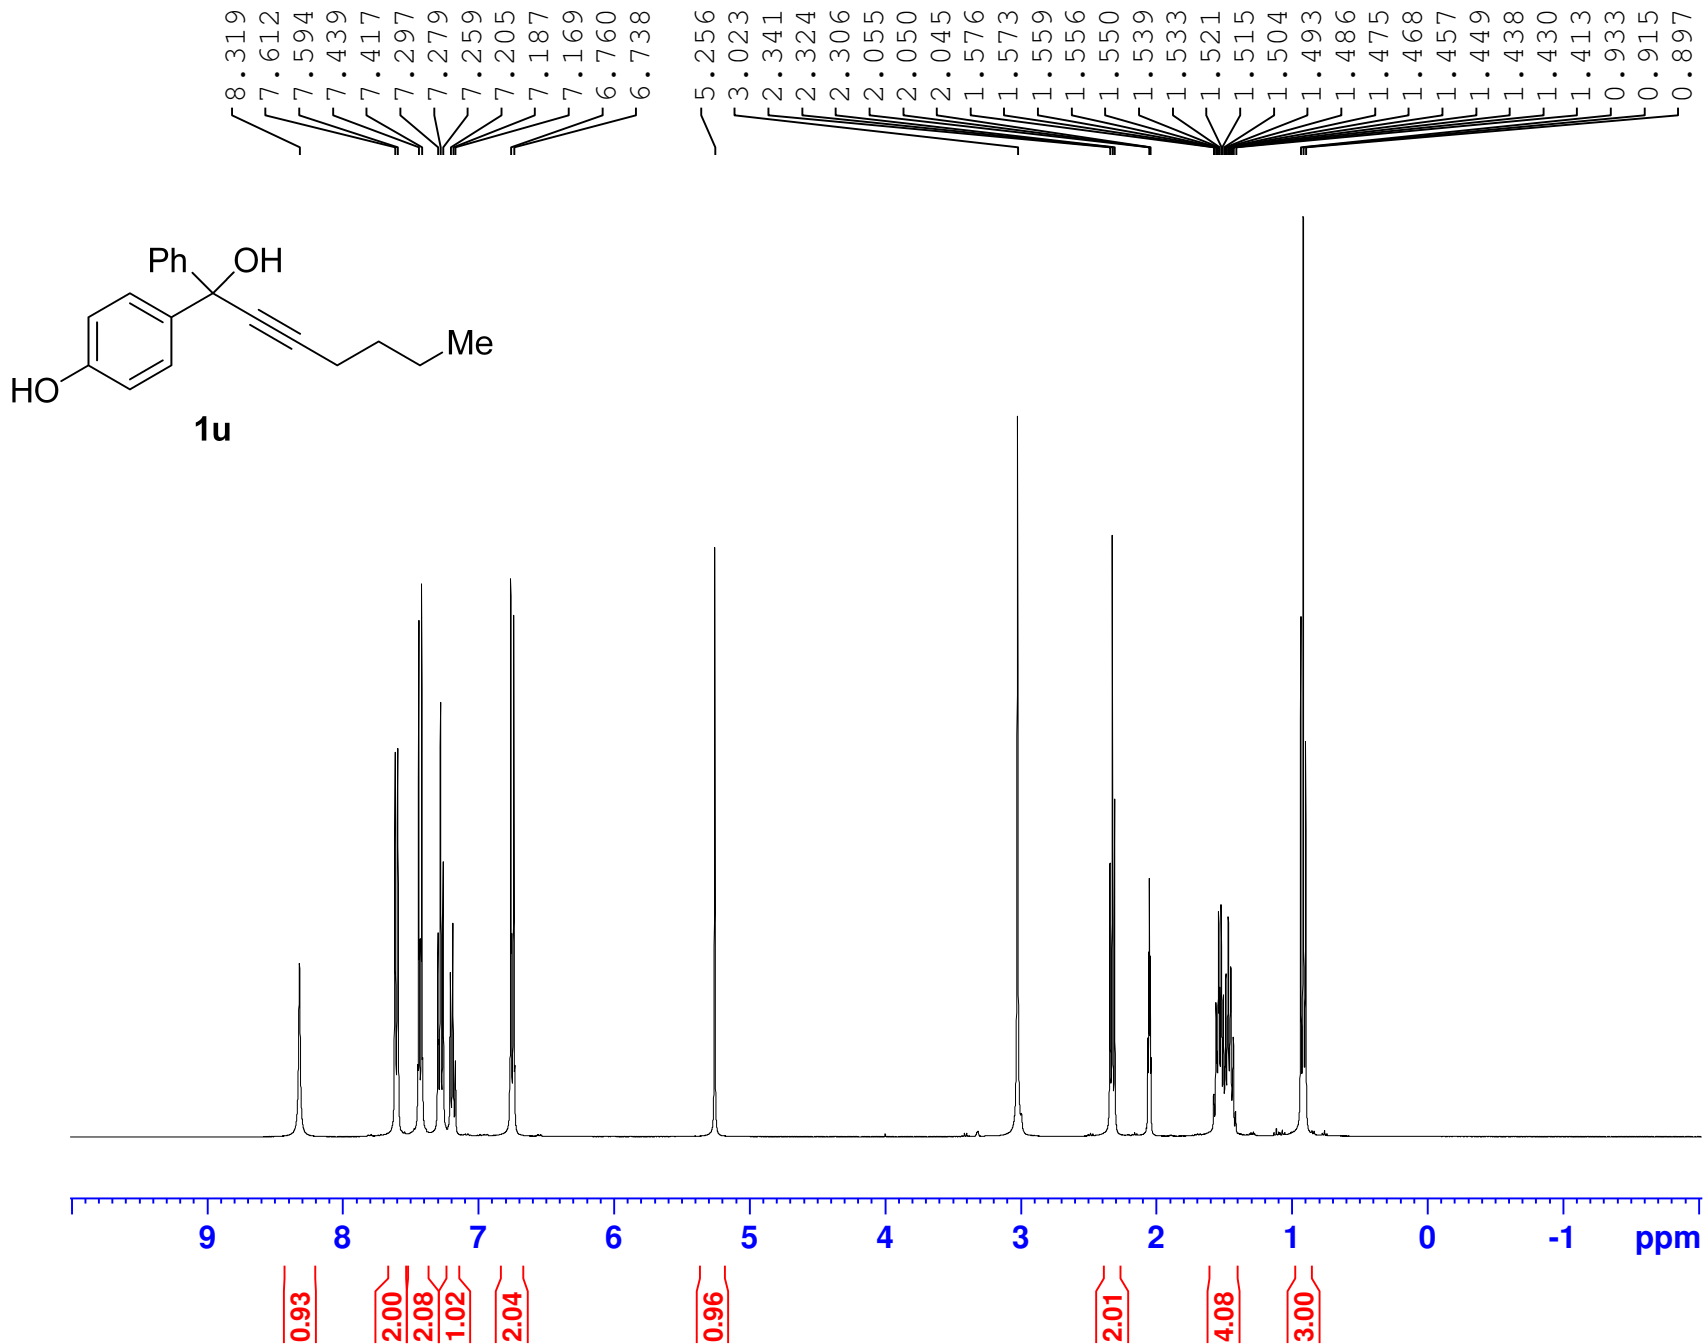

Current Data Parameters  
 NAME qdy-10160 H  
 EXPNO 2  
 PROCNO 1

F2 - Acquisition Parameters  
 Date\_ 20160328  
 Time 19.44  
 INSTRUM spect  
 PROBHD 5 mm PABBO BB/  
 PULPROG zg30  
 TD 65536  
 SOLVENT Acetone  
 NS 7  
 DS 0  
 SWH 8012.820 Hz  
 FIDRES 0.122266 Hz  
 AQ 4.0894465 sec  
 RG 45.67  
 DW 62.400 usec  
 DE 6.50 usec  
 TE 297.1 K  
 D1 1.00000000 sec  
 TD0 1

==== CHANNEL f1 =====  
 SFO1 400.1324710 MHz  
 NUC1 1H  
 P1 14.50 usec  
 PLW1 11.99499989 W

F2 - Processing parameters  
 SI 65536  
 SF 400.1300067 MHz  
 WDW EM  
 SSB 0  
 LB 0.30 Hz  
 GB 0  
 PC 1.00

Supplementary Figure 45. <sup>1</sup>H NMR spectrum for **1u**

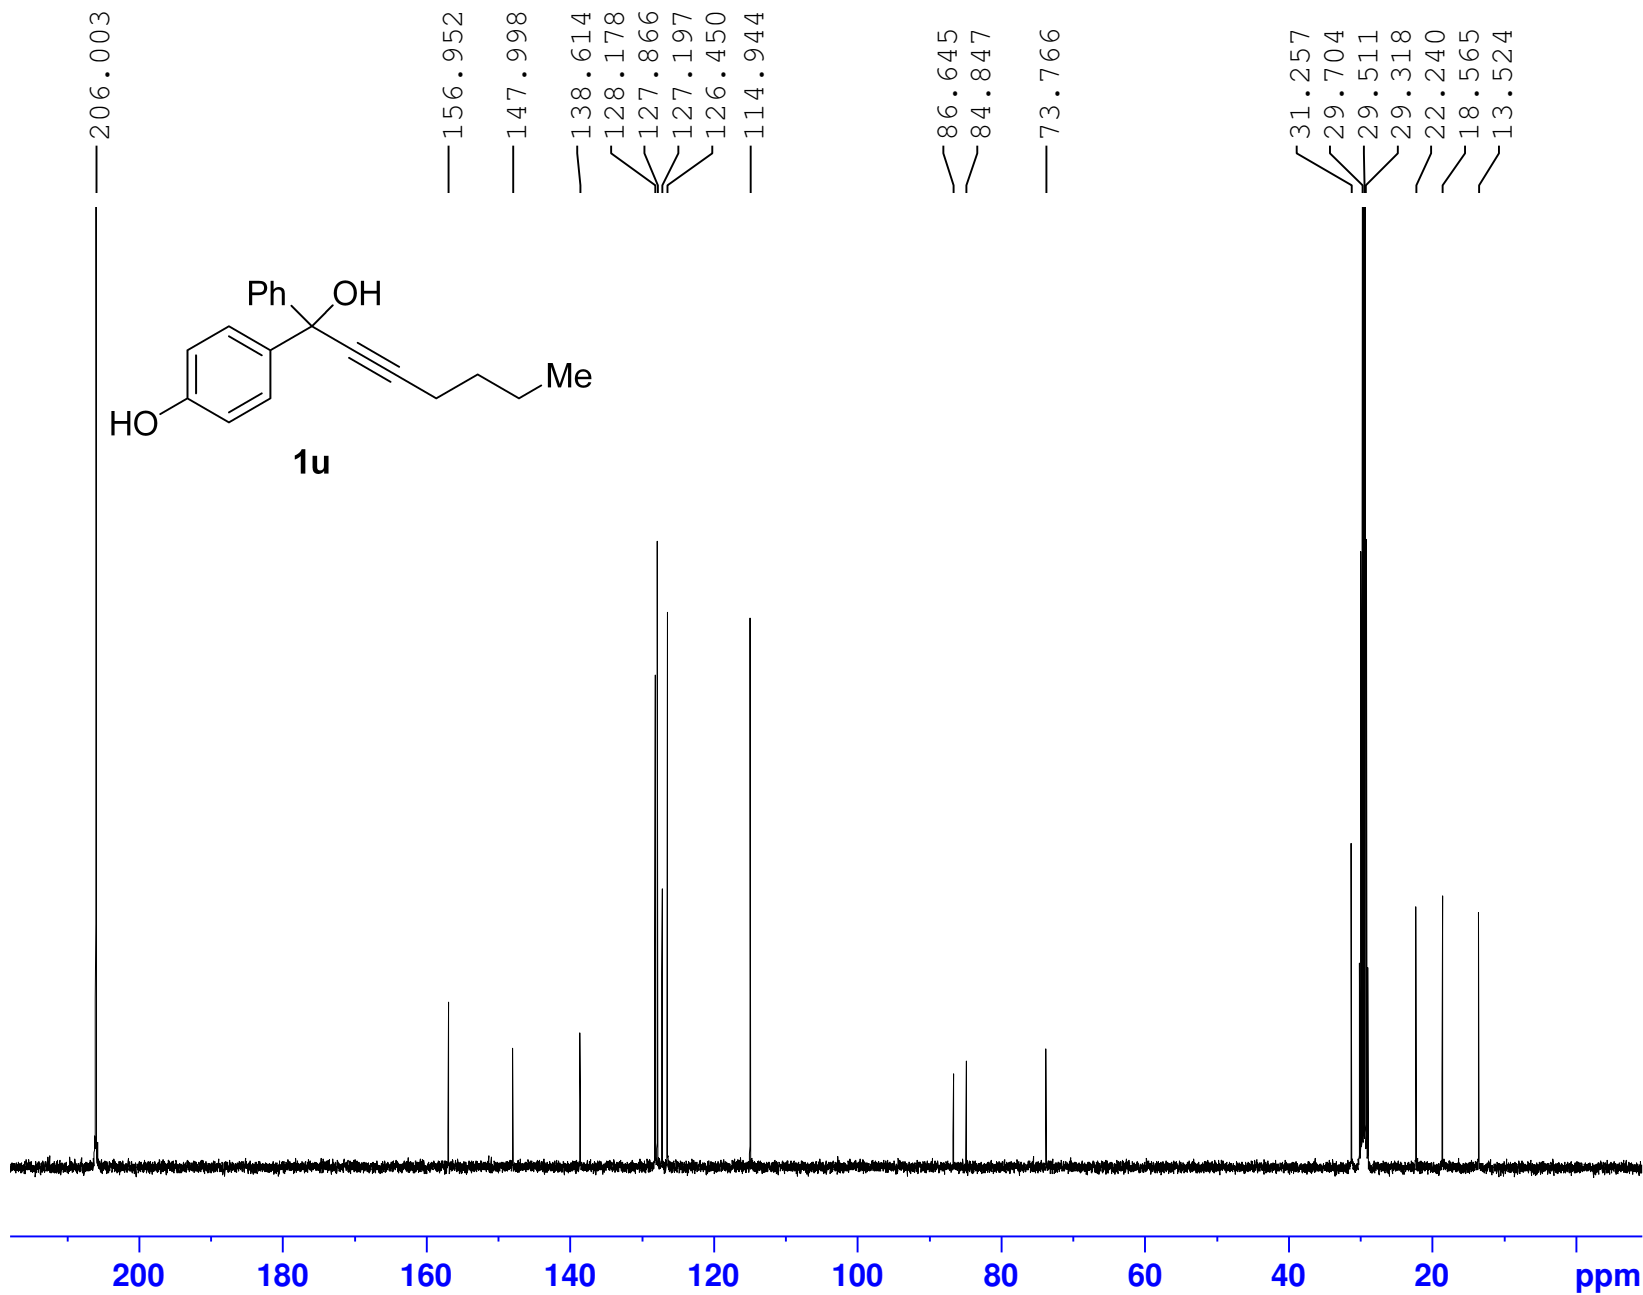

Current Data Parameters  
 NAME qdy-10160 C  
 EXPNO 2  
 PROCNO 1

F2 - Acquisition Parameters  
 Date\_ 20160328  
 Time 19.49  
 INSTRUM spect  
 PROBHD 5 mm PABBO BB/  
 PULPROG zgpg30  
 TD 65536  
 SOLVENT Acetone  
 NS 132  
 DS 0  
 SWH 24038.461 Hz  
 FIDRES 0.366798 Hz  
 AQ 1.3631488 sec  
 RG 196.92  
 DW 20.800 usec  
 DE 6.50 usec  
 TE 298.1 K  
 D1 2.00000000 sec  
 D11 0.03000000 sec  
 TD0 1

==== CHANNEL f1 =====  
 SFO1 100.6228298 MHz  
 NUC1 13C  
 P1 9.70 usec  
 PLW1 46.98899841 W

==== CHANNEL f2 =====  
 SFO2 400.1316005 MHz  
 NUC2 1H  
 CPDPRG[2] waltz16  
 PCPD2 90.00 usec  
 PLW2 11.99499989 W  
 PLW12 0.34213999 W  
 PLW13 0.27713001 W

F2 - Processing parameters  
 SI 32768  
 SF 100.6127155 MHz  
 WDW EM  
 SSB 0  
 LB 1.00 Hz  
 GB 0  
 PC 1.40

Supplementary Figure 46. <sup>13</sup>C NMR spectrum for 1u

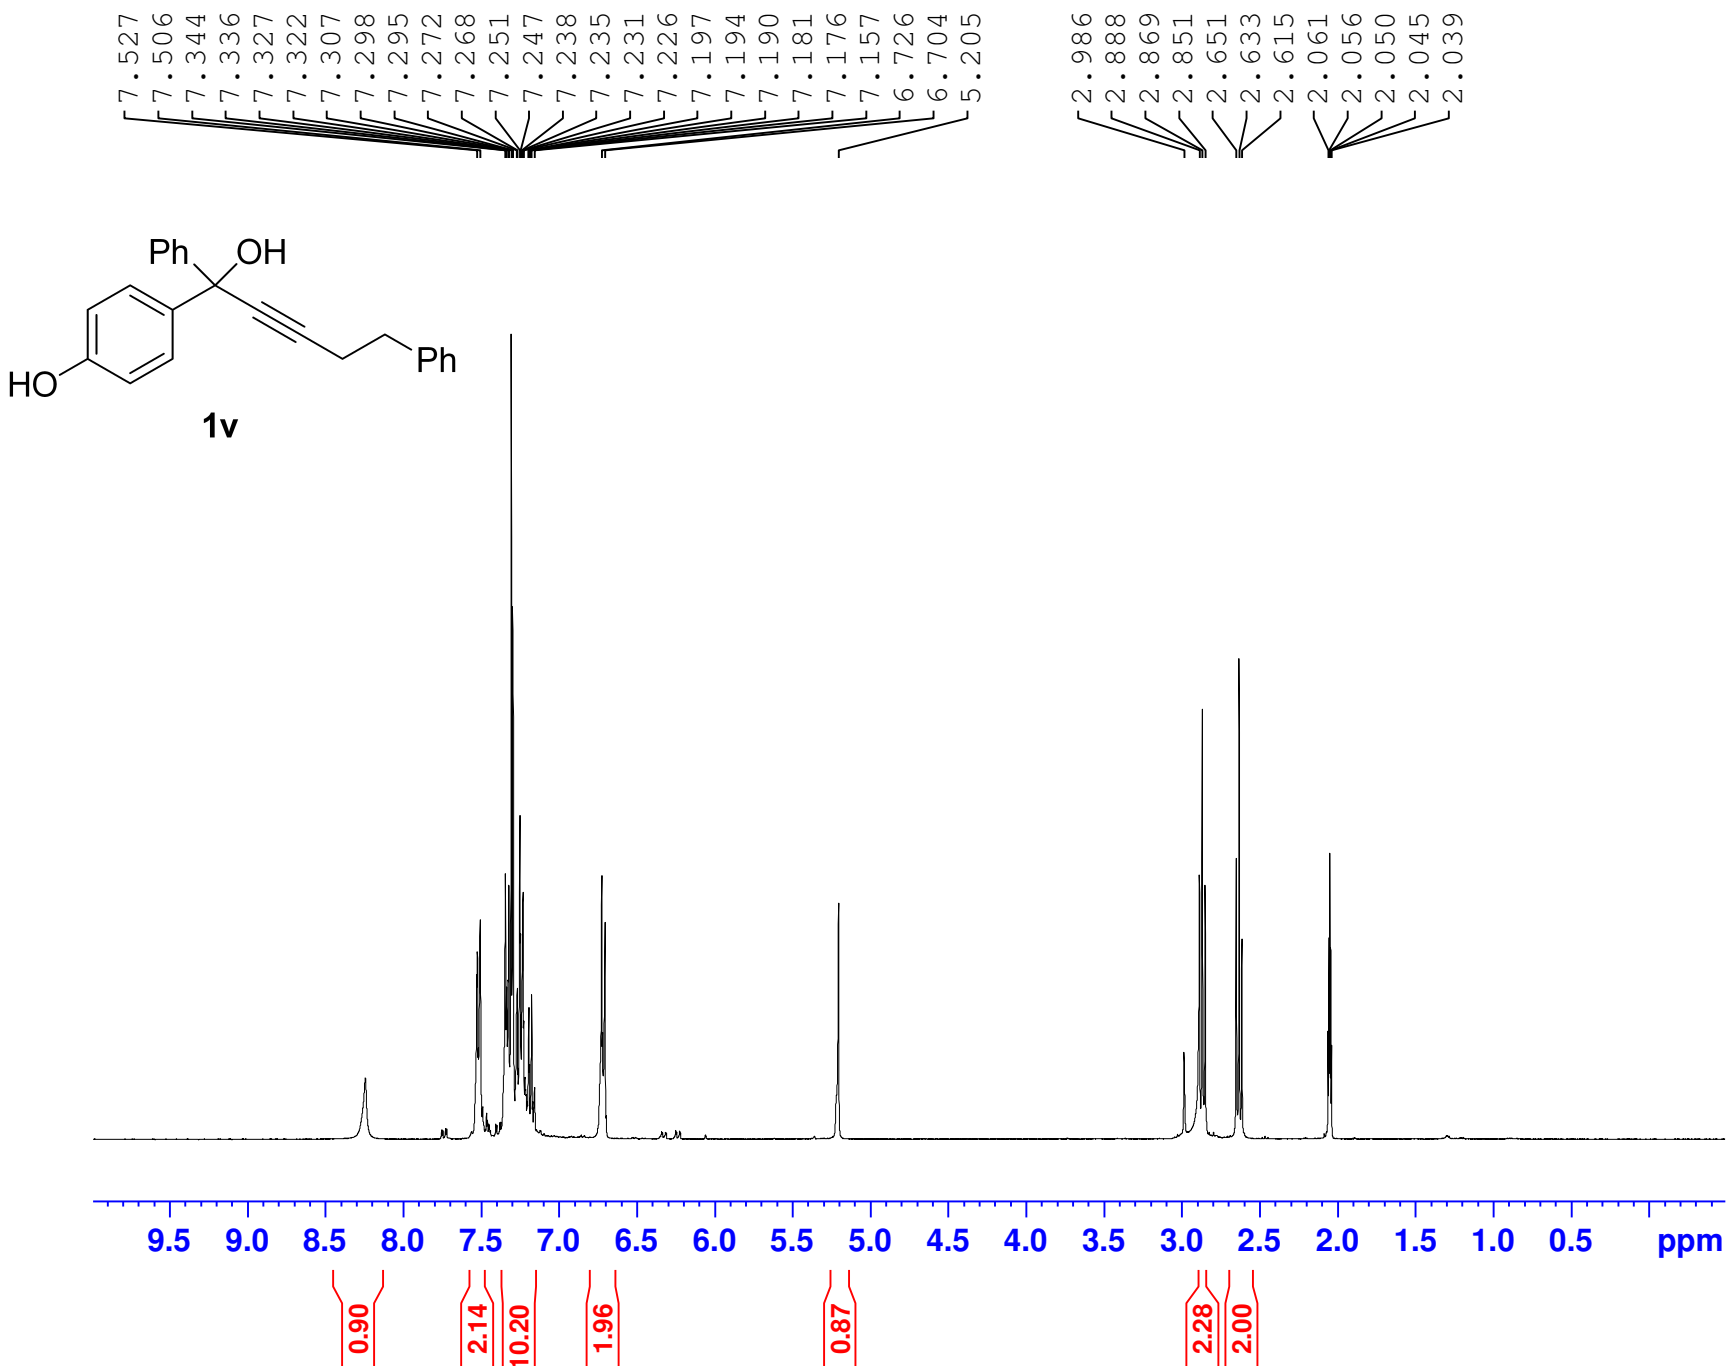

Current Data Parameters  
 NAME qdy-20116 H  
 EXPNO 2  
 PROCNO 1

F2 - Acquisition Parameters  
 Date\_ 20160418  
 Time 21.43  
 INSTRUM spect  
 PROBHD 5 mm PABBO BB/  
 PULPROG zg30  
 TD 65536  
 SOLVENT Acetone  
 NS 6  
 DS 0  
 SWH 8012.820 Hz  
 FIDRES 0.122266 Hz  
 AQ 4.0894465 sec  
 RG 103.52  
 DW 62.400 usec  
 DE 6.50 usec  
 TE 296.9 K  
 D1 1.00000000 sec  
 TD0 1

==== CHANNEL f1 =====  
 SFO1 400.1324710 MHz  
 NUC1 1H  
 P1 14.50 usec  
 PLW1 11.99499989 W

F2 - Processing parameters  
 SI 65536  
 SF 400.1300067 MHz  
 WDW EM  
 SSB 0  
 LB 0.30 Hz  
 GB 0  
 PC 1.00

Supplementary Figure 47. <sup>1</sup>H NMR spectrum for 1v

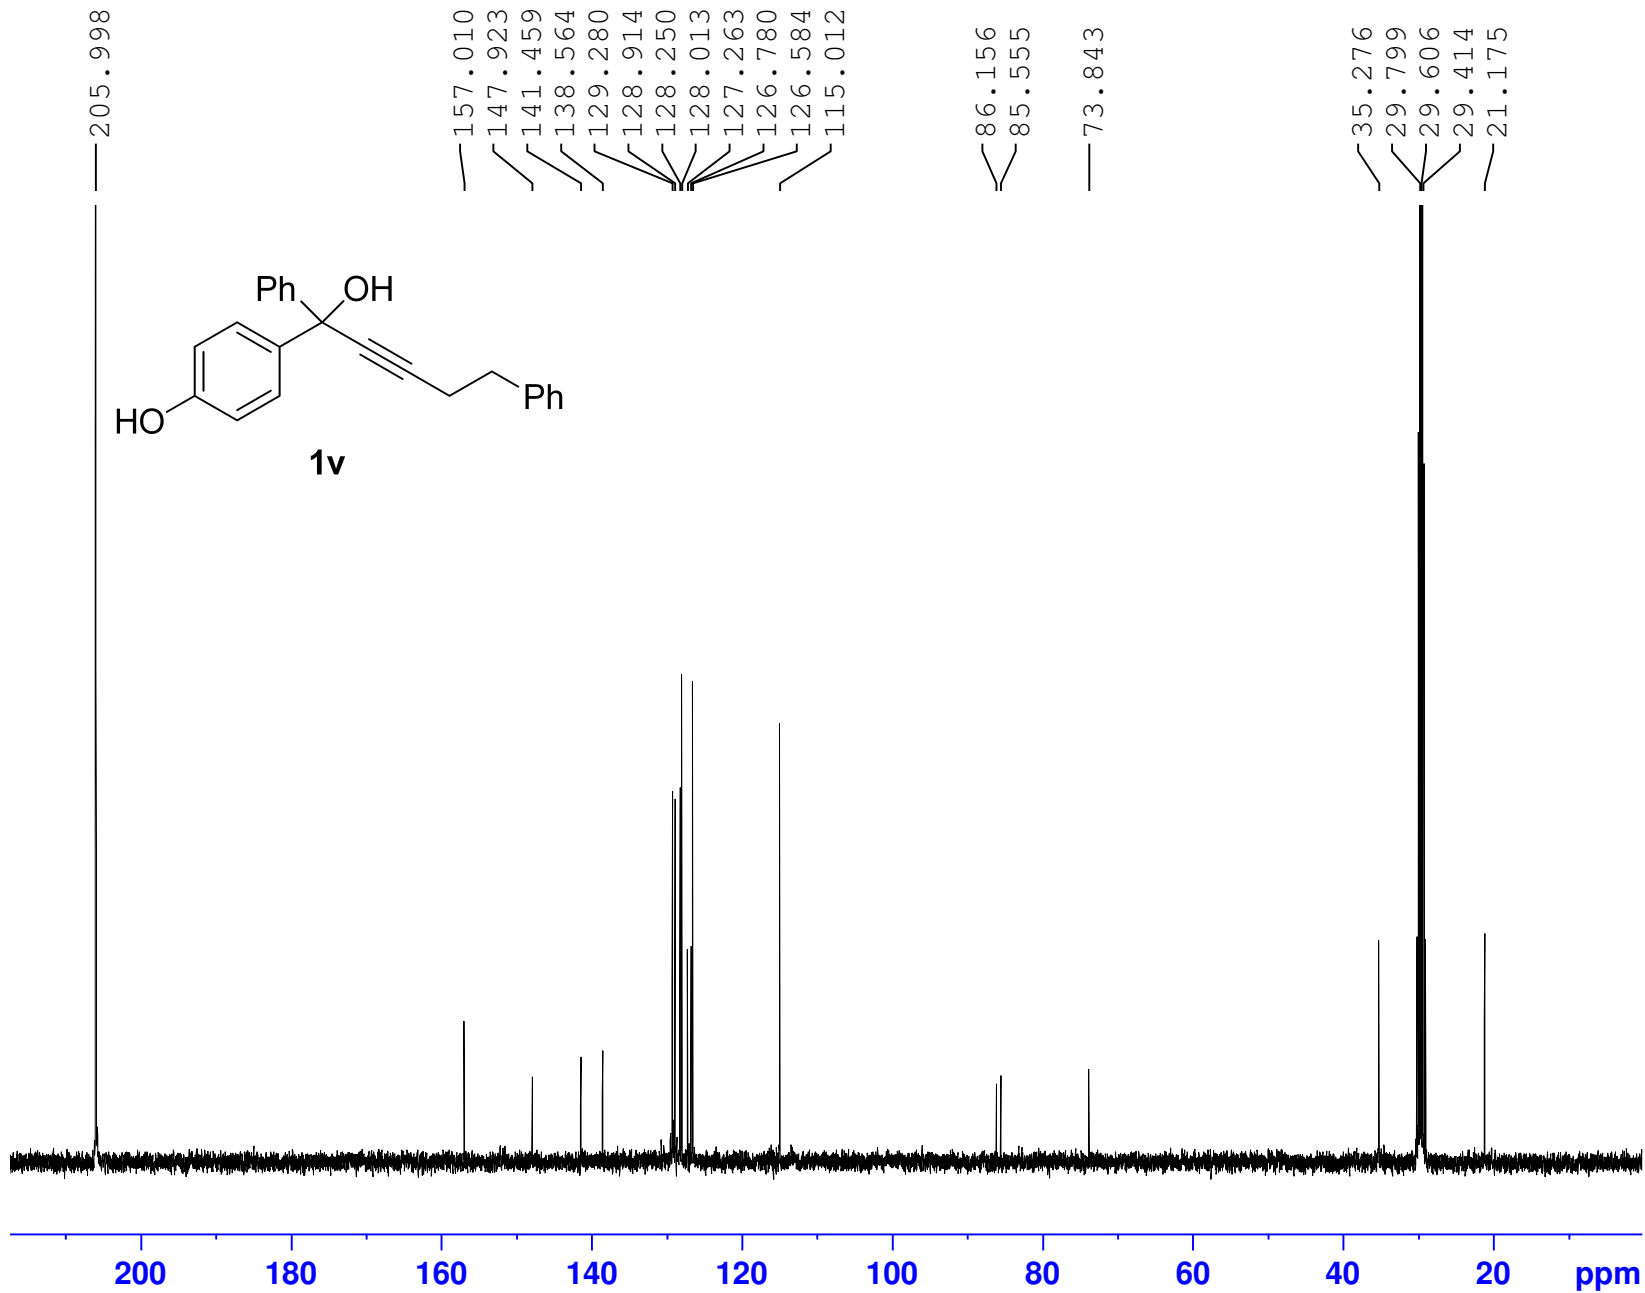

Current Data Parameters  
 NAME qdy-20116 C  
 EXPNO 1  
 PROCNO 1

F2 - Acquisition Parameters  
 Date\_ 20160418  
 Time 19.49  
 INSTRUM spect  
 PROBHD 5 mm PABBO BB/  
 PULPROG zgpg30  
 TD 65536  
 SOLVENT Acetone  
 NS 139  
 DS 0  
 SWH 24038.461 Hz  
 FIDRES 0.366798 Hz  
 AQ 1.3631488 sec  
 RG 196.92  
 DW 20.800 usec  
 DE 6.50 usec  
 TE 297.7 K  
 D1 2.00000000 sec  
 D11 0.03000000 sec  
 TD0 1

==== CHANNEL f1 =====  
 SFO1 100.6228298 MHz  
 NUC1 13C  
 P1 9.70 usec  
 PLW1 46.98899841 W

==== CHANNEL f2 =====  
 SFO2 400.1316005 MHz  
 NUC2 1H  
 CPDPRG[2] waltz16  
 PCPD2 90.00 usec  
 PLW2 11.99499989 W  
 PLW12 0.34213999 W  
 PLW13 0.27713001 W

F2 - Processing parameters  
 SI 32768  
 SF 100.6127051 MHz  
 WDW EM  
 SSB 0  
 LB 1.00 Hz  
 GB 0  
 PC 1.40

Supplementary Figure 48. <sup>13</sup>C NMR spectrum for **1v**

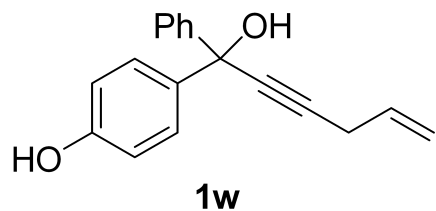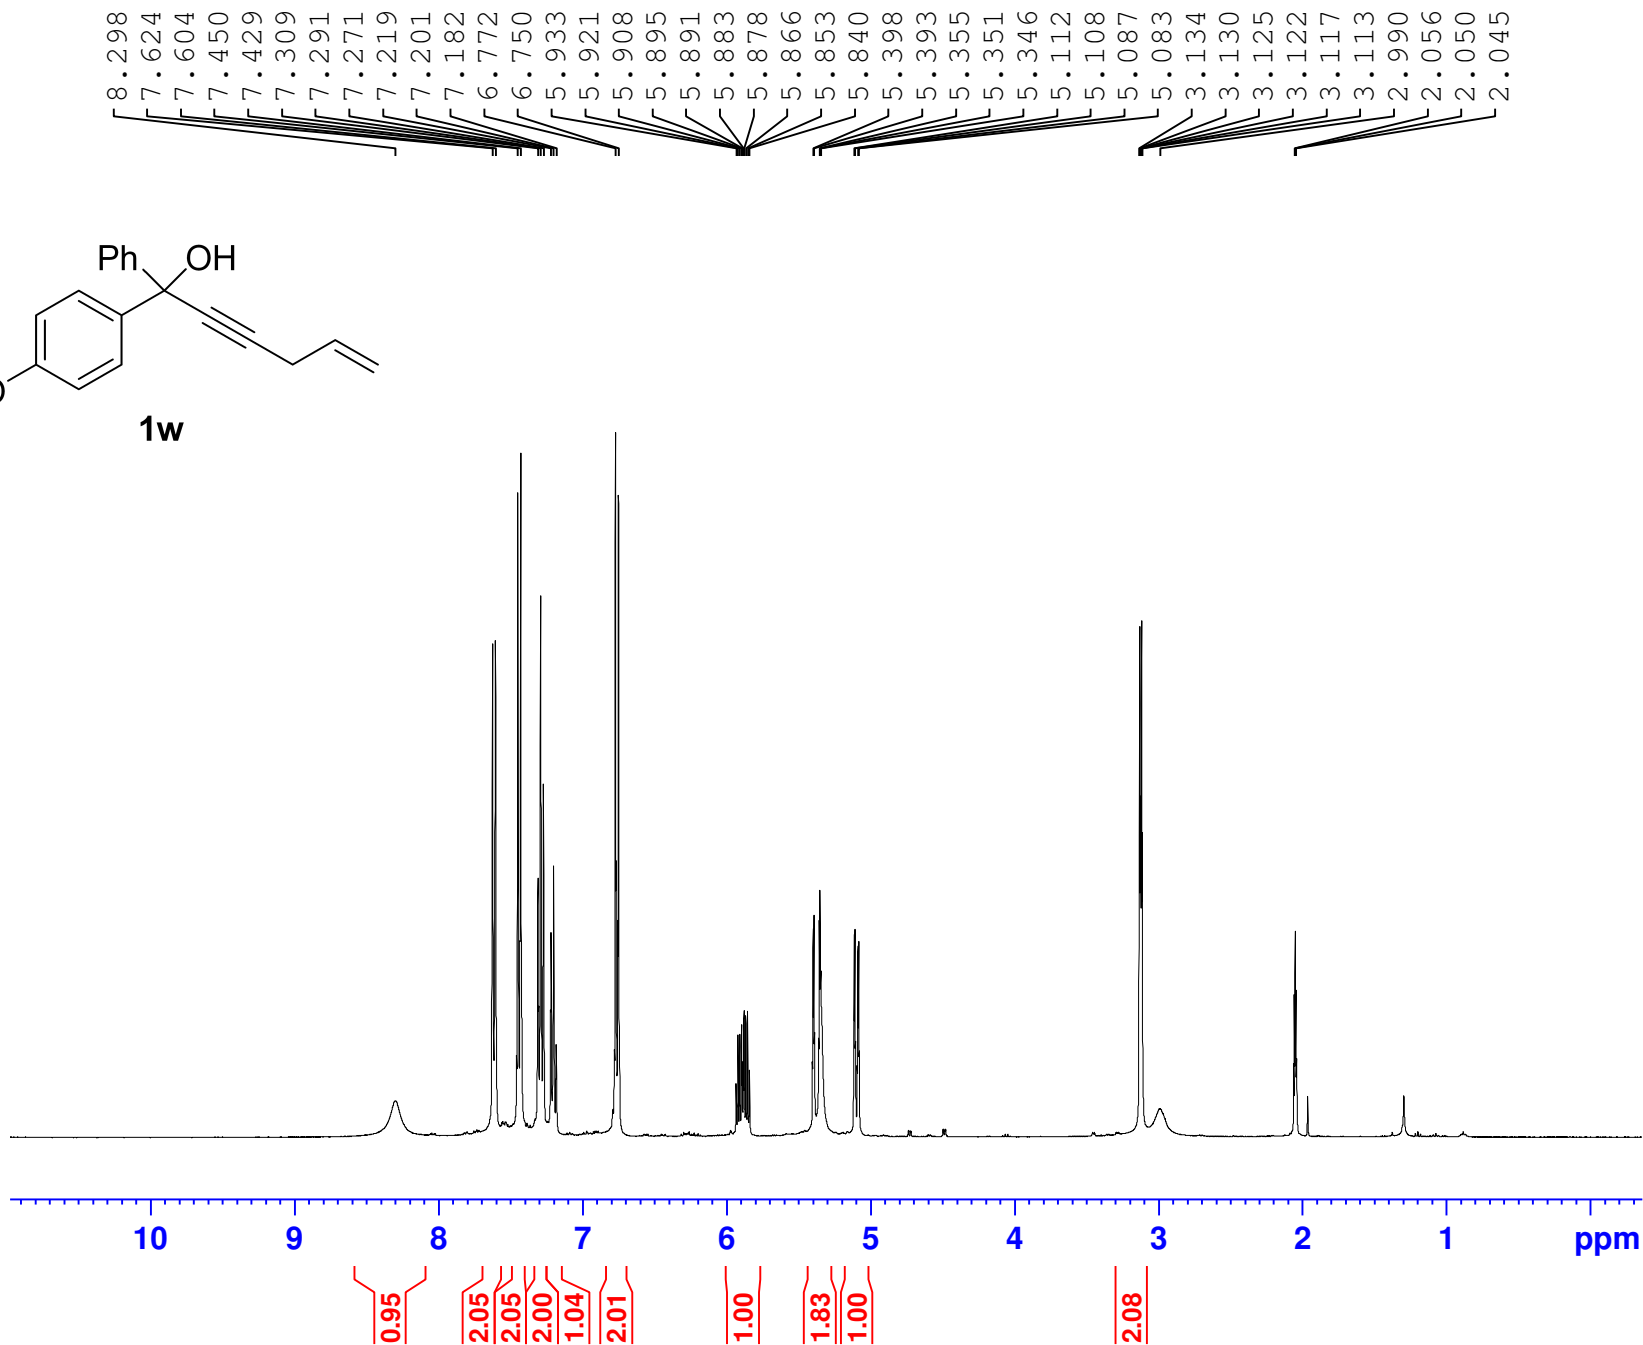

Current Data Parameters  
 NAME qdy-20114-c H  
 EXPNO 2  
 PROCNO 1

F2 - Acquisition Parameters  
 Date\_ 20160416  
 Time 19.16  
 INSTRUM spect  
 PROBHD 5 mm PABBO BB/  
 PULPROG zg30  
 TD 65536  
 SOLVENT Acetone  
 NS 5  
 DS 0  
 SWH 8012.820 Hz  
 FIDRES 0.122266 Hz  
 AQ 4.0894465 sec  
 RG 54.81  
 DW 62.400 usec  
 DE 6.50 usec  
 TE 298.2 K  
 D1 1.00000000 sec  
 TD0 1

===== CHANNEL f1 =====  
 SFO1 400.1324710 MHz  
 NUC1 1H  
 P1 14.50 usec  
 PLW1 11.99499989 W

F2 - Processing parameters  
 SI 65536  
 SF 400.1300066 MHz  
 WDW EM  
 SSB 0  
 LB 0.30 Hz  
 GB 0  
 PC 1.00

**Supplementary Figure 49. <sup>1</sup>H NMR spectrum for 1w**

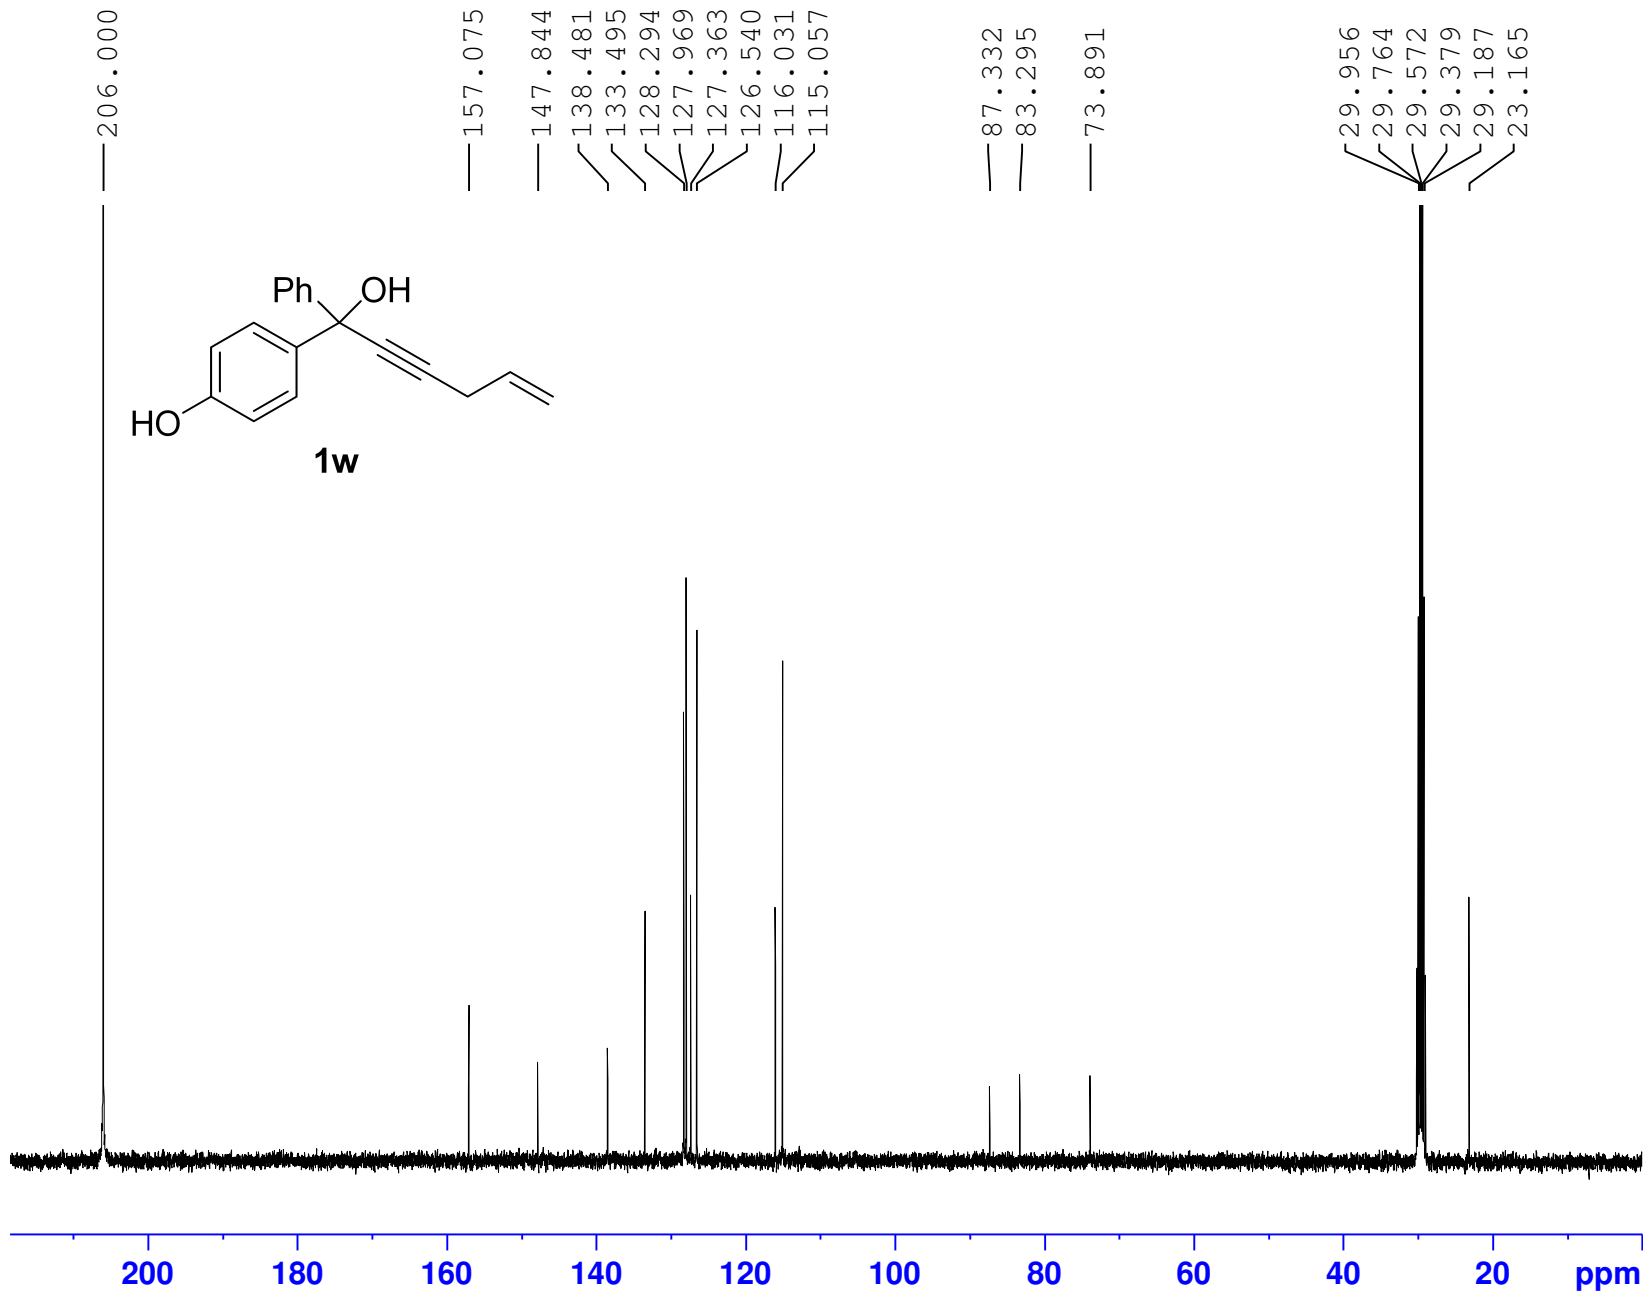

Current Data Parameters  
 NAME qdy-20114-c C  
 EXPNO 2  
 PROCNO 1

F2 - Acquisition Parameters  
 Date\_ 20160416  
 Time 19.20  
 INSTRUM spect  
 PROBHD 5 mm PABBO BB/  
 PULPROG zgpg30  
 TD 65536  
 SOLVENT Acetone  
 NS 86  
 DS 0  
 SWH 24038.461 Hz  
 FIDRES 0.366798 Hz  
 AQ 1.3631488 sec  
 RG 196.92  
 DW 20.800 usec  
 DE 6.50 usec  
 TE 299.2 K  
 D1 2.00000000 sec  
 D11 0.03000000 sec  
 TD0 1

==== CHANNEL f1 =====  
 SFO1 100.6228298 MHz  
 NUC1 13C  
 P1 9.70 usec  
 PLW1 46.98899841 W

==== CHANNEL f2 =====  
 SFO2 400.1316005 MHz  
 NUC2 1H  
 CPDPRG[2] waltz16  
 PCPD2 90.00 usec  
 PLW2 11.99499989 W  
 PLW12 0.34213999 W  
 PLW13 0.27713001 W

F2 - Processing parameters  
 SI 32768  
 SF 100.6127088 MHz  
 WDW EM  
 SSB 0  
 LB 1.00 Hz  
 GB 0  
 PC 1.40

Supplementary Figure 50. <sup>13</sup>C NMR spectrum for 1w

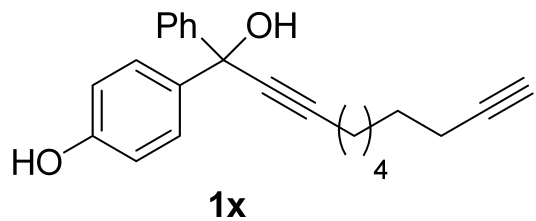

7.578  
7.560  
7.449  
7.427  
7.331  
7.313  
7.294  
7.260  
7.242  
7.224  
6.770  
6.748

5.323  
5.320  
5.317  
5.241

2.825  
2.365  
2.347  
2.329  
2.201  
2.194  
2.184  
2.177  
2.166  
2.159  
1.975  
1.969  
1.962

1.640  
1.614  
1.596  
1.579  
1.561  
1.546  
1.529  
1.513  
1.445  
1.438

Current Data Parameters  
NAME qdy-20082-1 H  
EXPNO 3  
PROCNO 1

F2 - Acquisition Parameters  
Date\_ 20160317  
Time 16.48  
INSTRUM spect  
PROBHD 5 mm PABBO BB/  
PULPROG zg30  
TD 65536  
SOLVENT CD2C12  
NS 7  
DS 0  
SWH 8012.820 Hz  
FIDRES 0.122266 Hz  
AQ 4.0894465 sec  
RG 103.52  
DW 62.400 usec  
DE 6.50 usec  
TE 296.4 K  
D1 1.00000000 sec  
TD0 1

==== CHANNEL f1 =====  
SFO1 400.1324710 MHz  
NUC1 1H  
P1 14.50 usec  
PLW1 11.99499989 W

F2 - Processing parameters  
SI 65536  
SF 400.1300153 MHz  
WDW EM  
SSB 0  
LB 0.30 Hz  
GB 0  
PC 1.00

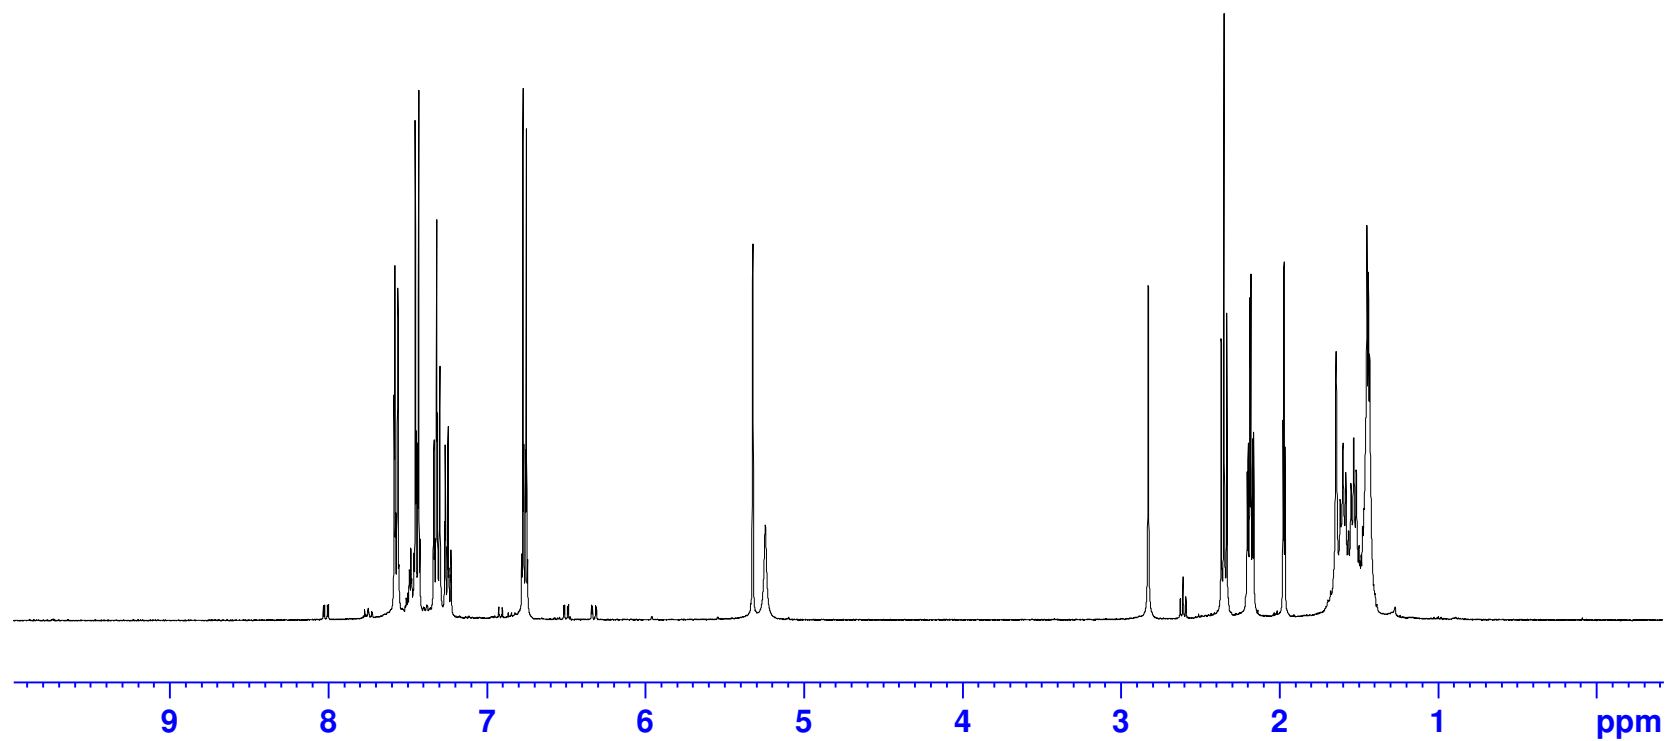

1.95  
2.06  
2.01  
1.05  
2.00

0.90

0.98  
2.04  
2.24  
0.97  
2.39  
2.04  
4.22

Supplementary Figure 51. <sup>1</sup>H NMR spectrum for 1x



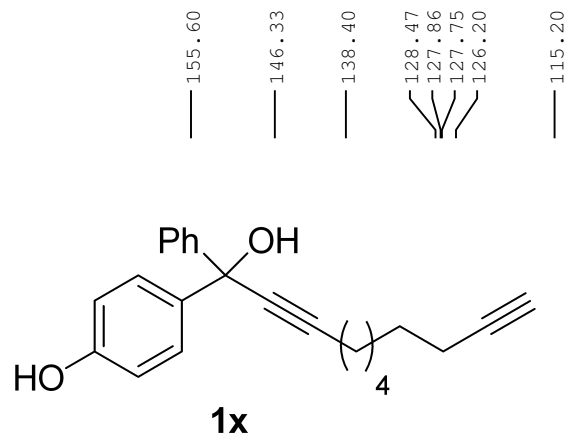

Supplementary Figure 52. <sup>13</sup>C NMR spectrum for 1x

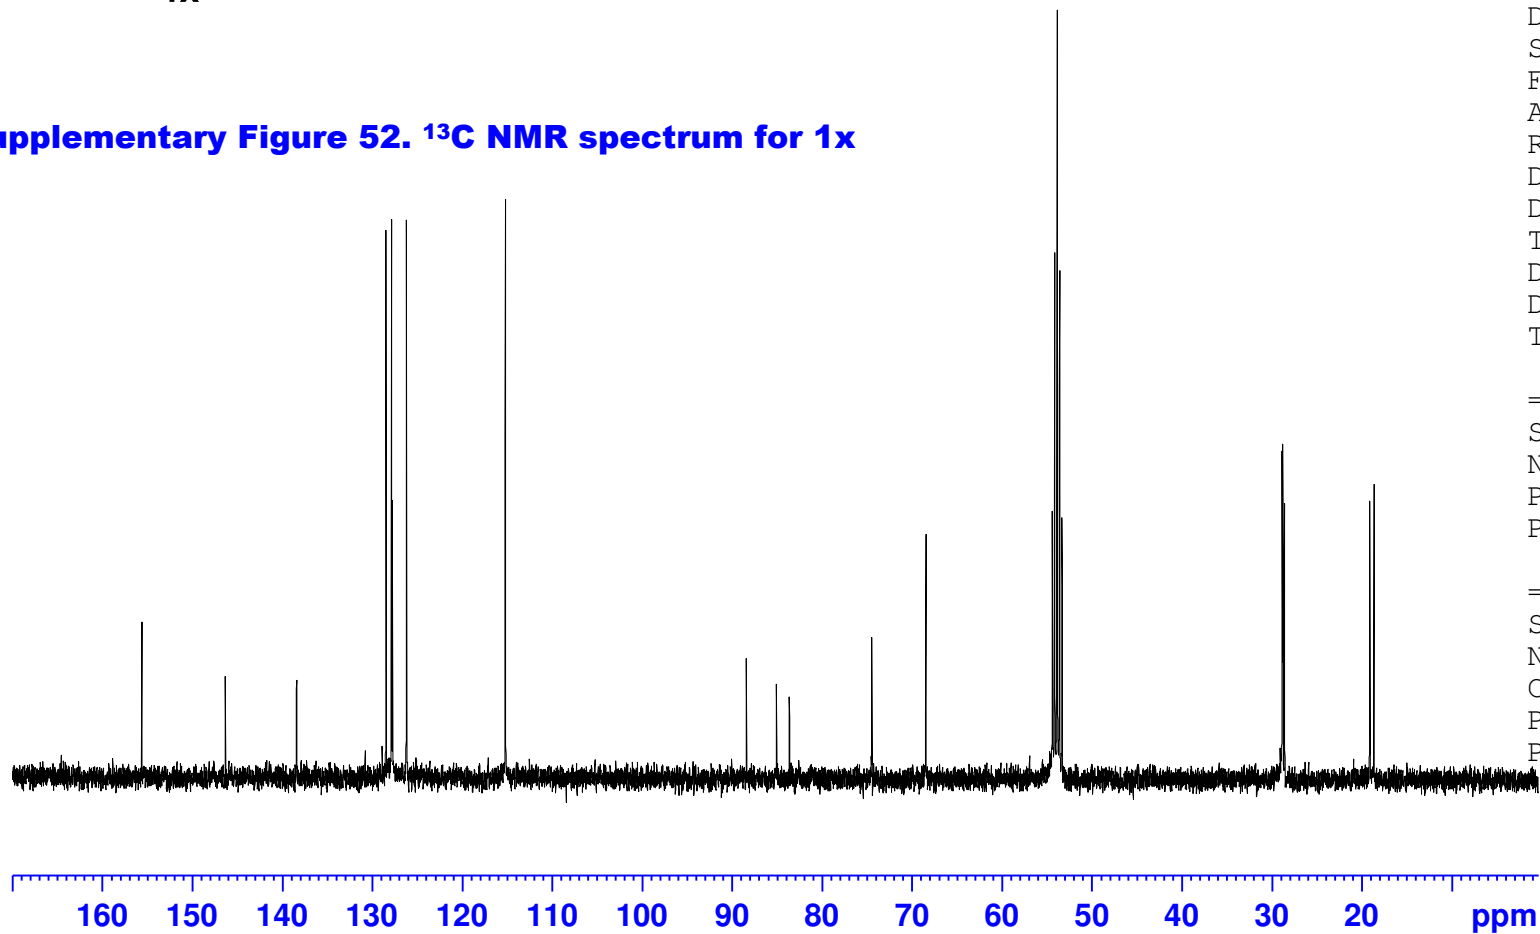

Current Data Parameters

NAME qdy-20082-2 C  
EXPNO 2  
PROCNO 1

F2 - Acquisition Parameters

Date\_ 20160316  
Time 21.30  
INSTRUM spect  
PROBHD 5 mm PABBO BB/  
PULPROG zgpg30  
TD 65536  
SOLVENT CD2Cl2  
NS 116  
DS 0  
SWH 24038.461 F  
FIDRES 0.366798 F  
AQ 1.3631488 s  
RG 196.92  
DW 20.800 u  
DE 6.50 u  
TE 297.5 F  
D1 2.0000000 s  
D11 0.0300000 s  
TD0 1

===== CHANNEL f1 =====

SFO1 100.6228298 M  
NUC1 13C  
P1 9.70 u  
PLW1 46.98899841 W

===== CHANNEL f2 =====

SFO2 400.1316005 M  
NUC2 1H  
CPDPRG[2] waltz16  
PCPD2 90.00 u  
PLW2 11.99499989 W

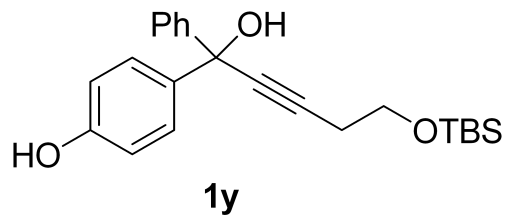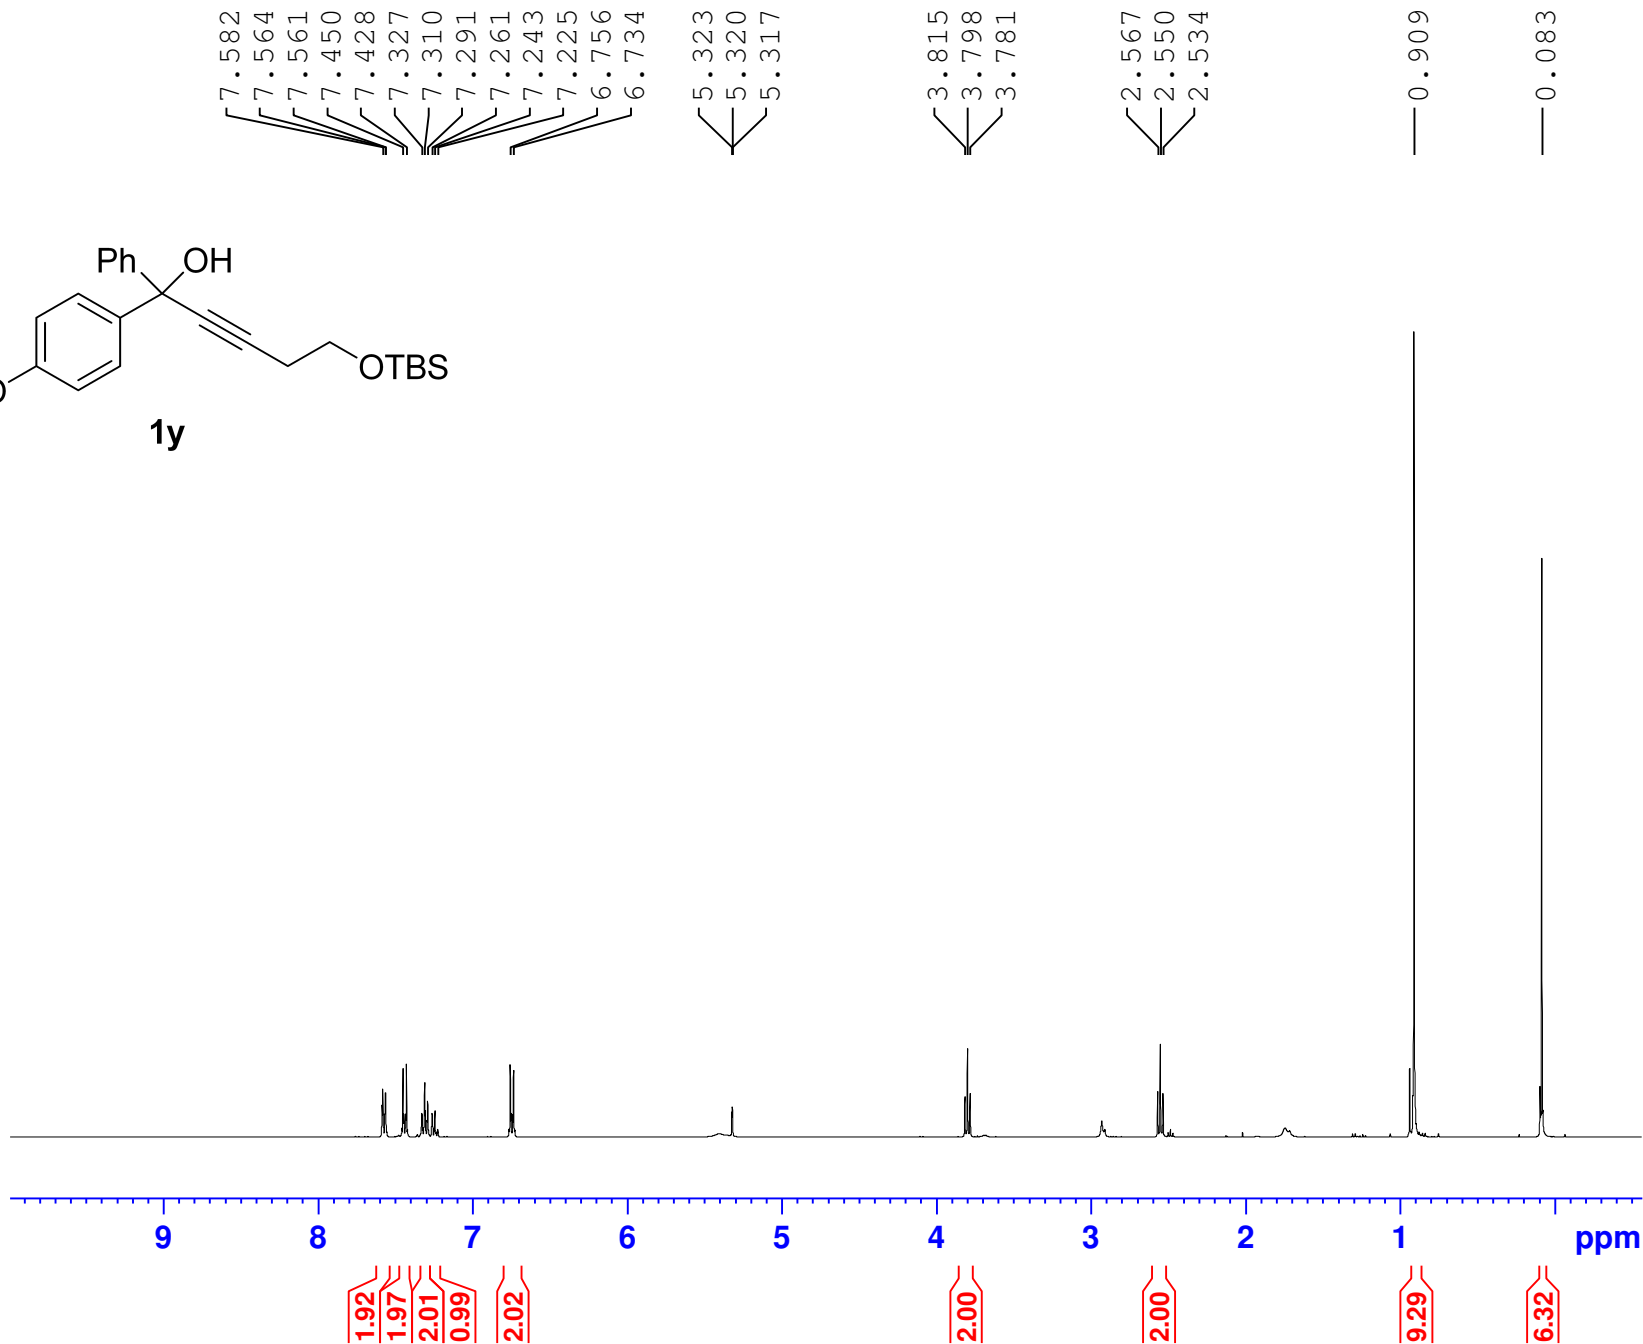

Current Data Parameters  
 NAME qdy-20085-1 H  
 EXPNO 2  
 PROCNO 1

F2 - Acquisition Parameters  
 Date\_ 20160319  
 Time 19.52  
 INSTRUM spect  
 PROBHD 5 mm PABBO BB/  
 PULPROG zg30  
 TD 65536  
 SOLVENT CD2C12  
 NS 16  
 DS 0  
 SWH 8012.820 Hz  
 FIDRES 0.122266 Hz  
 AQ 4.0894465 sec  
 RG 82.92  
 DW 62.400 usec  
 DE 6.50 usec  
 TE 297.9 K  
 D1 1.00000000 sec  
 TD0 1

==== CHANNEL f1 =====  
 SFO1 400.1324710 MHz  
 NUC1 1H  
 P1 14.50 usec  
 PLW1 11.99499989 W

F2 - Processing parameters  
 SI 65536  
 SF 400.1300153 MHz  
 WDW EM  
 SSB 0  
 LB 0.30 Hz  
 GB 0  
 PC 1.00

Supplementary Figure 53. <sup>1</sup>H NMR spectrum for **1y**

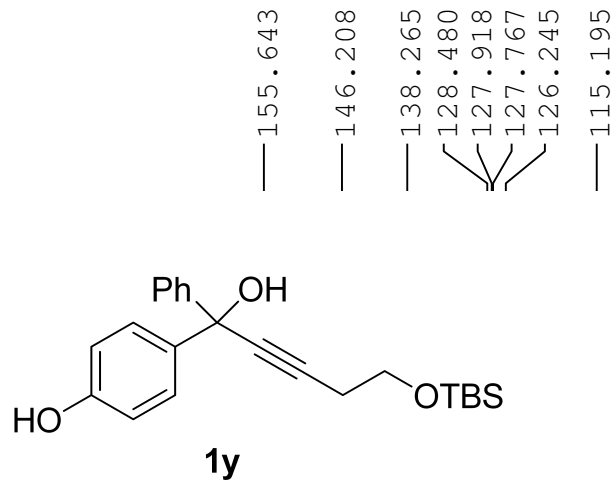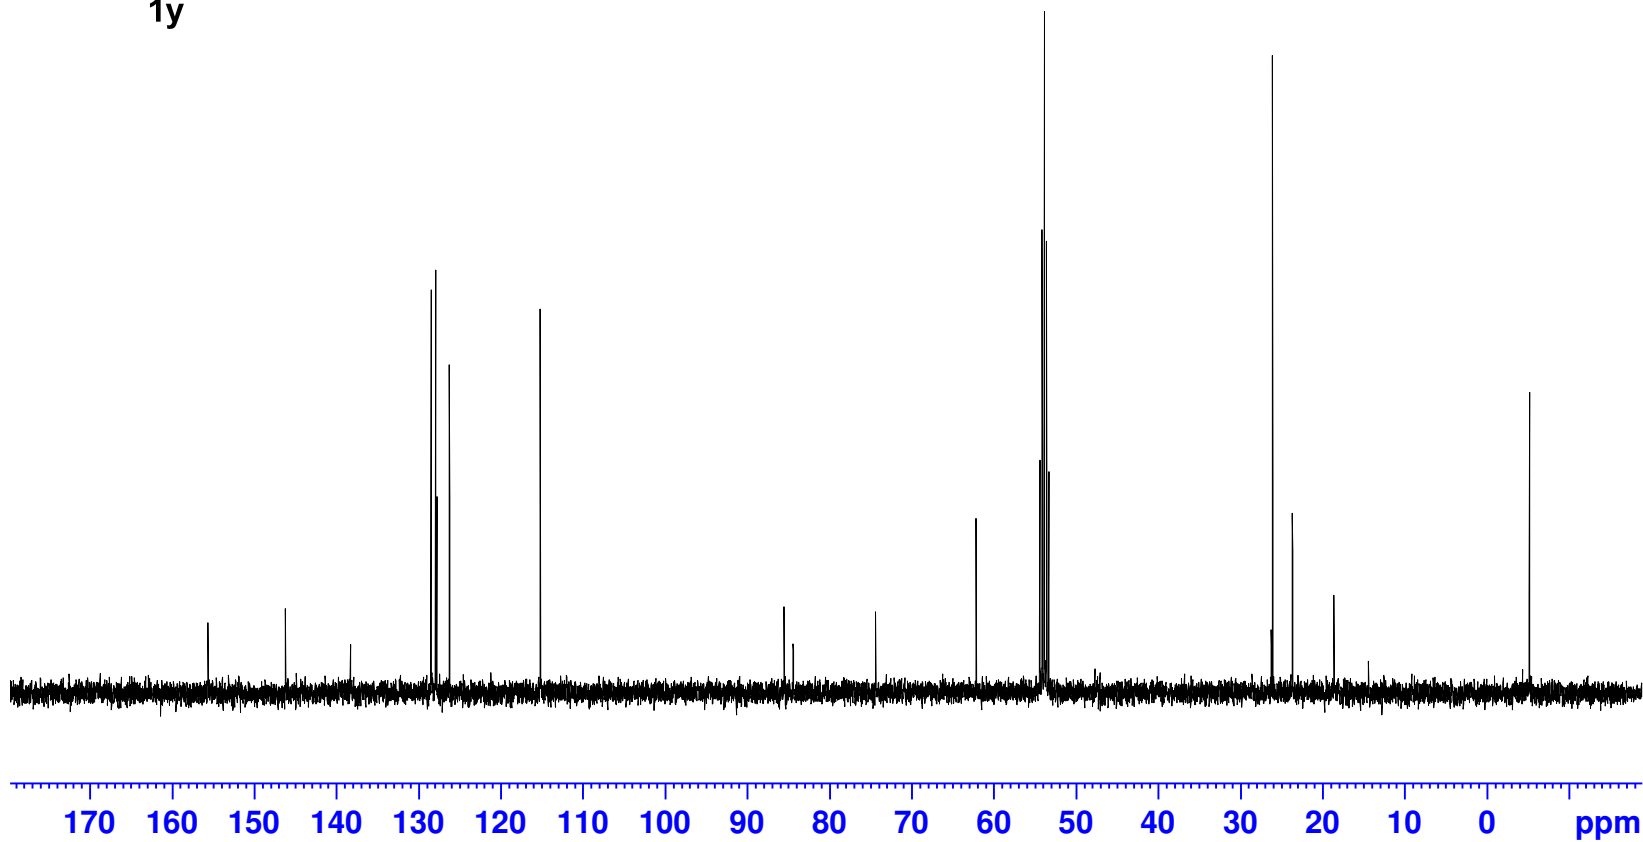

Current Data Parameters  
 NAME qdy-20085-1 C  
 EXPNO 1  
 PROCNO 1

F2 - Acquisition Parameters  
 Date\_ 20160317  
 Time 16.57  
 INSTRUM spect  
 PROBHD 5 mm PABBO BB/  
 PULPROG zgpg30  
 TD 65536  
 SOLVENT CD2C12  
 NS 74  
 DS 0  
 SWH 24038.461 Hz  
 FIDRES 0.366798 Hz  
 AQ 1.3631488 sec  
 RG 196.92  
 DW 20.800 usec  
 DE 6.50 usec  
 TE 297.5 K  
 D1 2.00000000 sec  
 D11 0.03000000 sec  
 TD0 1

==== CHANNEL f1 =====  
 SFO1 100.6228298 MHz  
 NUC1 13C  
 P1 9.70 usec  
 PLW1 46.98899841 W

==== CHANNEL f2 =====  
 SFO2 400.1316005 MHz  
 NUC2 1H  
 CPDPRG[2] waltz16  
 PCPD2 90.00 usec  
 PLW2 11.99499989 W  
 PLW12 0.34213999 W  
 PLW13 0.27713001 W

F2 - Processing parameters  
 SI 32768  
 SF 100.6127277 MHz  
 WDW EM  
 SSB 0  
 LB 1.00 Hz  
 GB 0  
 PC 1.40

**Supplementary Figure 54. <sup>13</sup>C NMR spectrum for 1y**

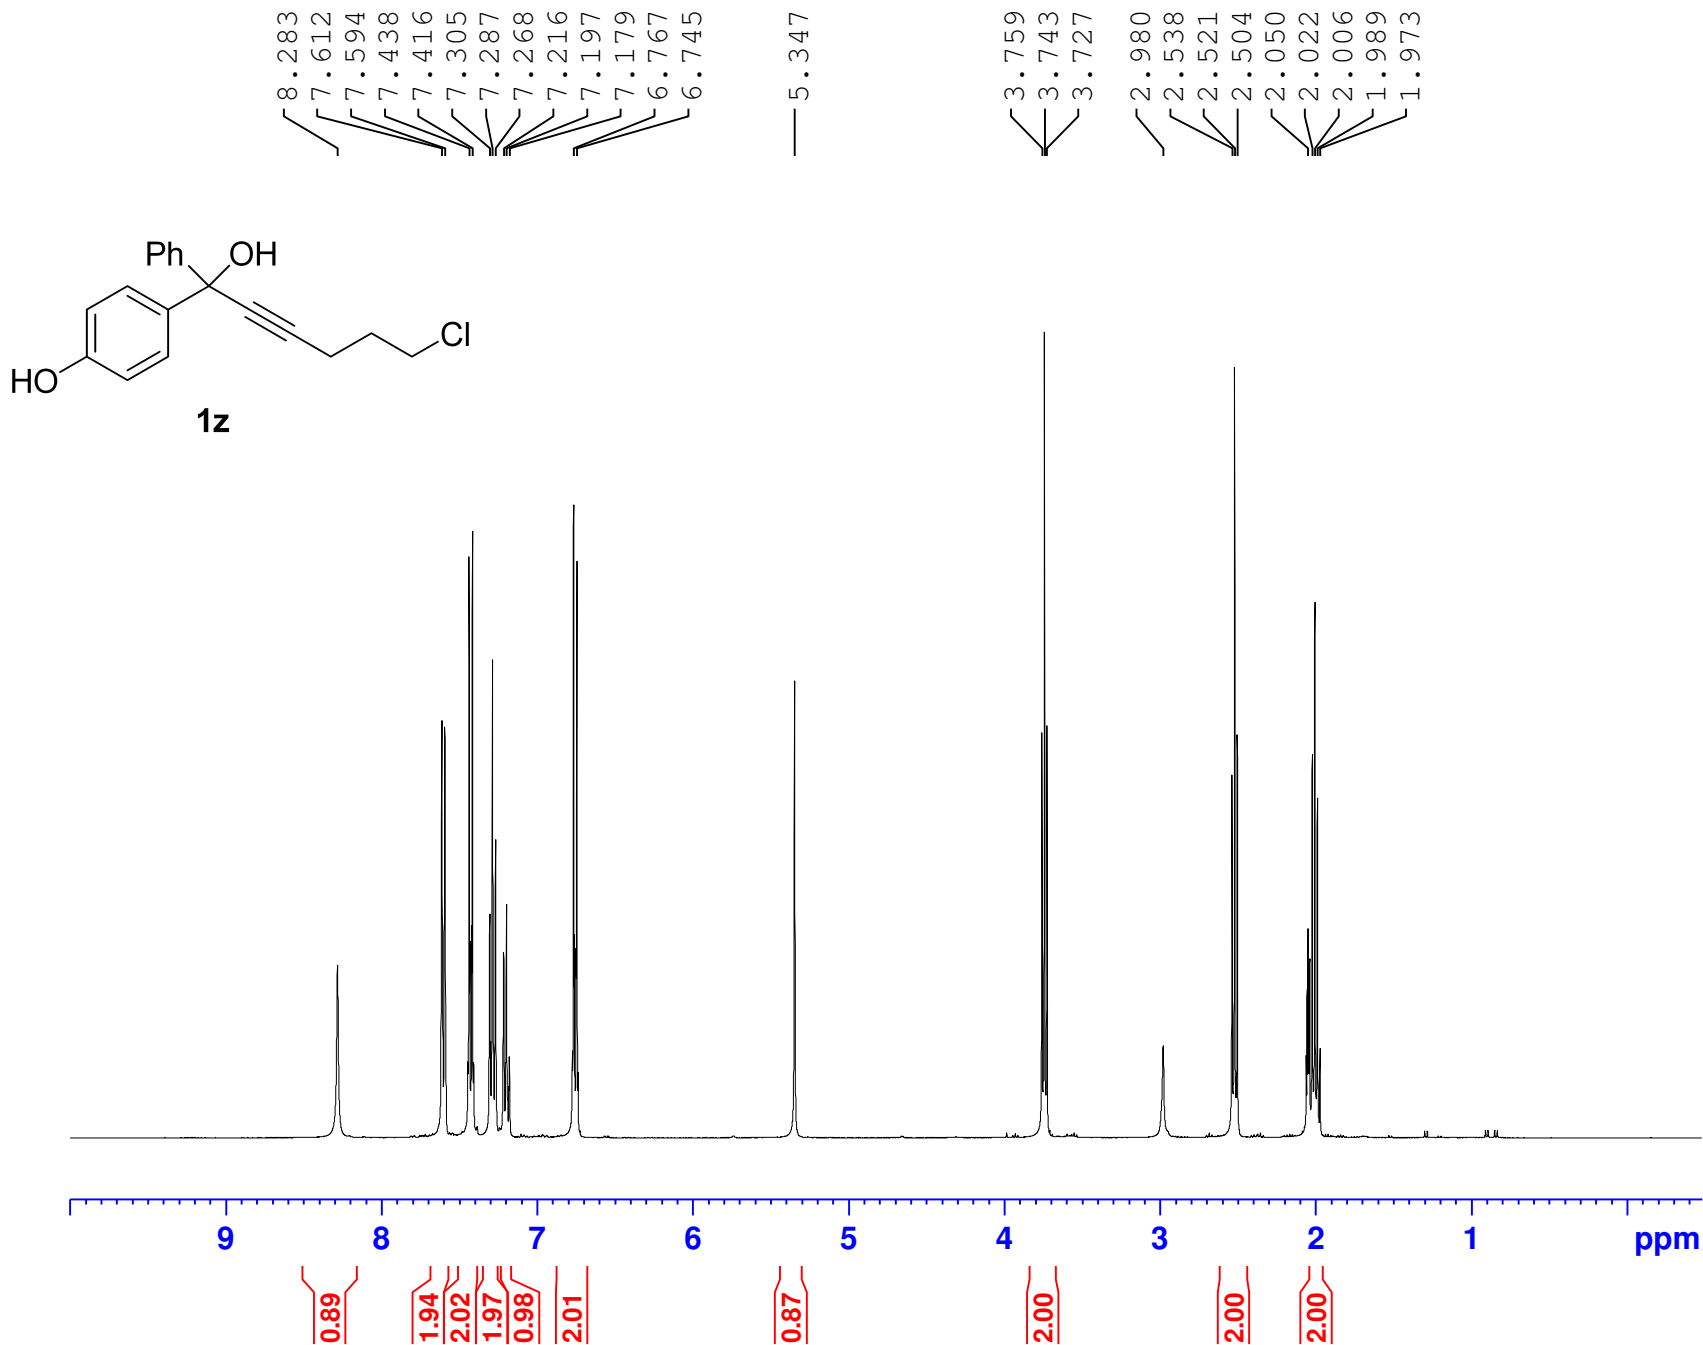

Current Data Parameters  
 NAME qdy-20108-H  
 EXPNO 1  
 PROCNO 2

F2 - Acquisition Parameters  
 Date\_ 20160413  
 Time 14.25  
 INSTRUM spect  
 PROBHD 5 mm PABBO BB/  
 PULPROG zg30  
 TD 65536  
 SOLVENT Acetone  
 NS 16  
 DS 0  
 SWH 8012.820 Hz  
 FIDRES 0.122266 Hz  
 AQ 4.0894465 sec  
 RG 54.81  
 DW 62.400 usec  
 DE 6.50 usec  
 TE 296.7 K  
 D1 1.00000000 sec  
 TD0 1

===== CHANNEL f1 =====  
 SFO1 400.1324710 MHz  
 NUC1 1H  
 P1 14.50 usec  
 PLW1 11.99499989 W

F2 - Processing parameters  
 SI 65536  
 SF 400.1300066 MHz  
 WDW EM  
 SSB 0  
 LB 0.30 Hz  
 GB 0  
 PC 1.00

Supplementary Figure 55. <sup>1</sup>H NMR spectrum for 1z

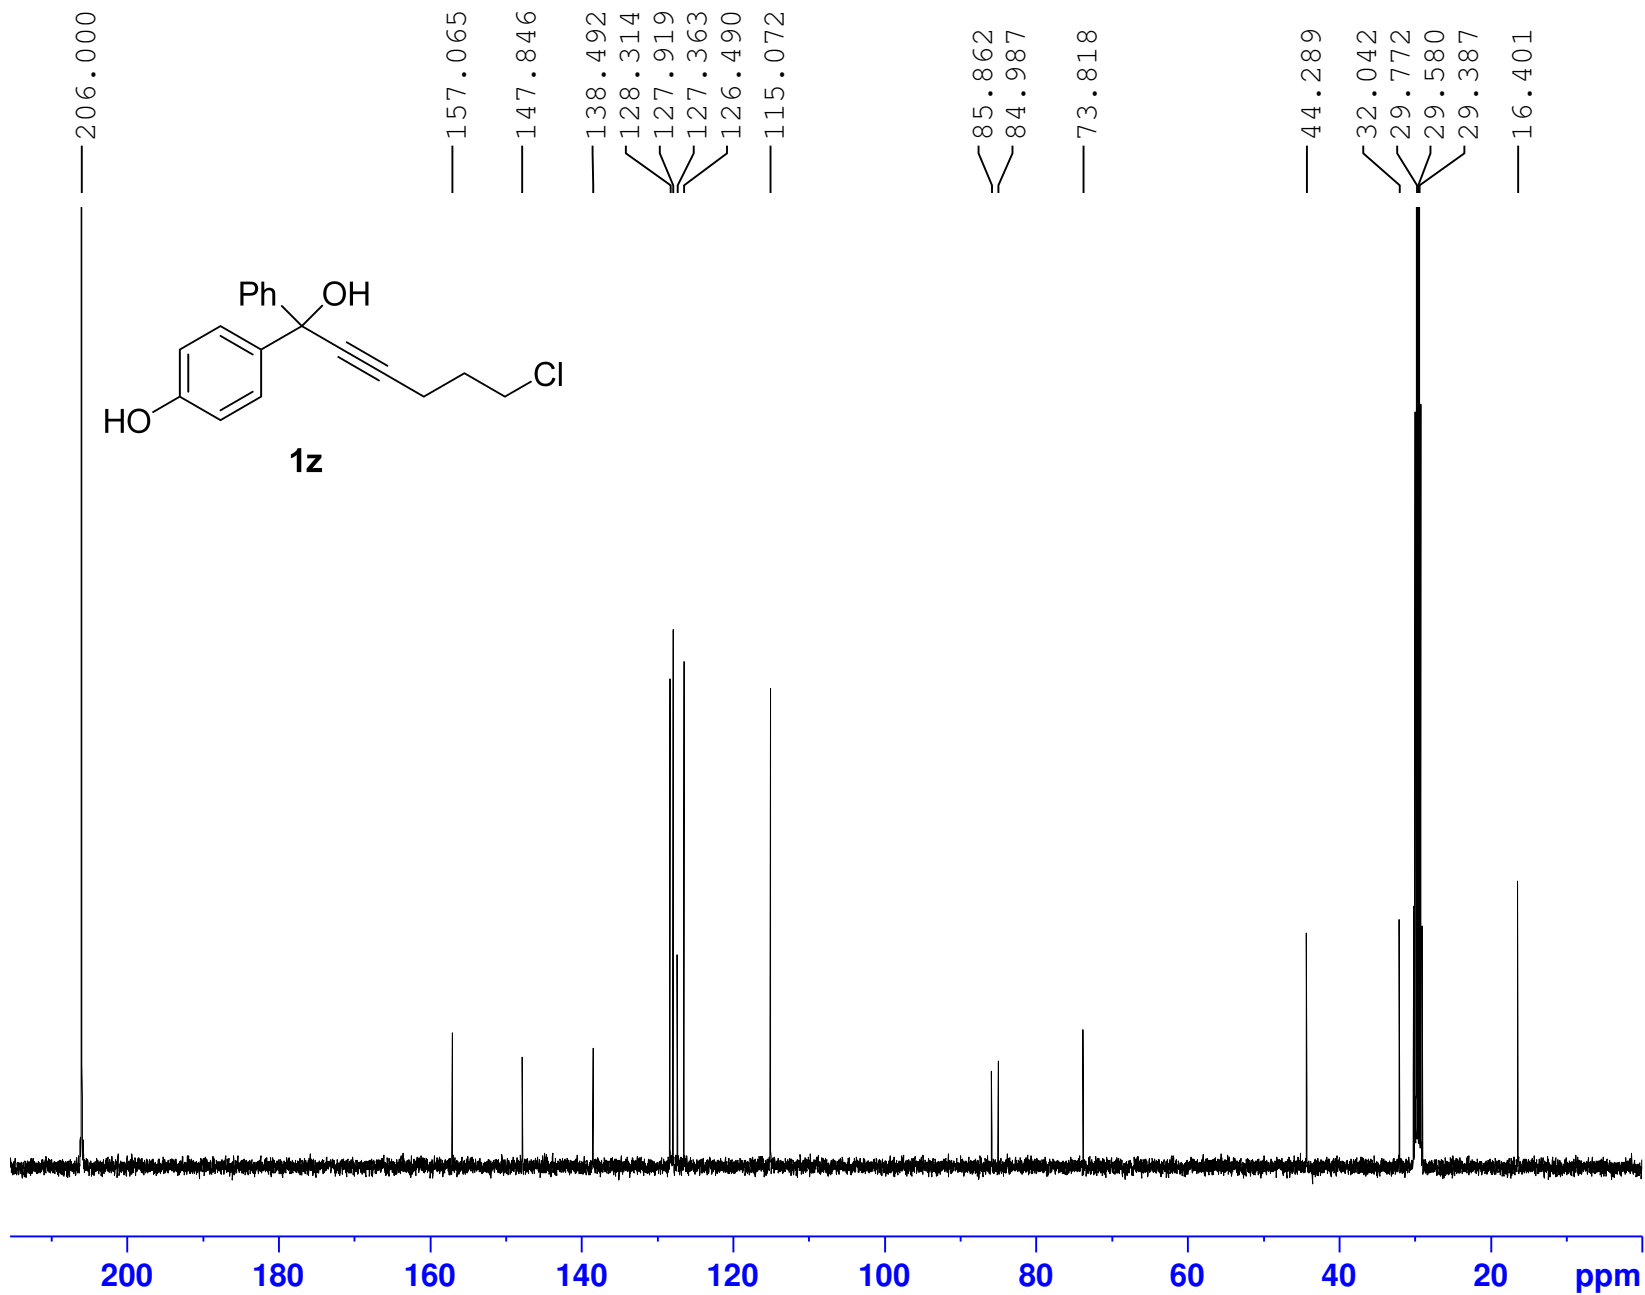

Current Data Parameters  
 NAME qdy-20108 C  
 EXPNO 1  
 PROCNO 2

F2 - Acquisition Parameters  
 Date\_ 20160412  
 Time 21.56  
 INSTRUM spect  
 PROBHD 5 mm PABBO BB/  
 PULPROG zgpg30  
 TD 65536  
 SOLVENT Acetone  
 NS 91  
 DS 0  
 SWH 24038.461 Hz  
 FIDRES 0.366798 Hz  
 AQ 1.3631488 sec  
 RG 196.92  
 DW 20.800 usec  
 DE 6.50 usec  
 TE 297.4 K  
 D1 2.00000000 sec  
 D11 0.03000000 sec  
 TD0 1

==== CHANNEL f1 =====  
 SFO1 100.6228298 MHz  
 NUC1 13C  
 P1 9.70 usec  
 PLW1 46.98899841 W

==== CHANNEL f2 =====  
 SFO2 400.1316005 MHz  
 NUC2 1H  
 CPDPRG[2] waltz16  
 PCPD2 90.00 usec  
 PLW2 11.99499989 W  
 PLW12 0.34213999 W  
 PLW13 0.27713001 W

F2 - Processing parameters  
 SI 32768  
 SF 100.6127086 MHz  
 WDW EM  
 SSB 0  
 LB 1.00 Hz  
 GB 0  
 PC 1.40

Supplementary Figure 56. <sup>13</sup>C NMR spectrum for 1z

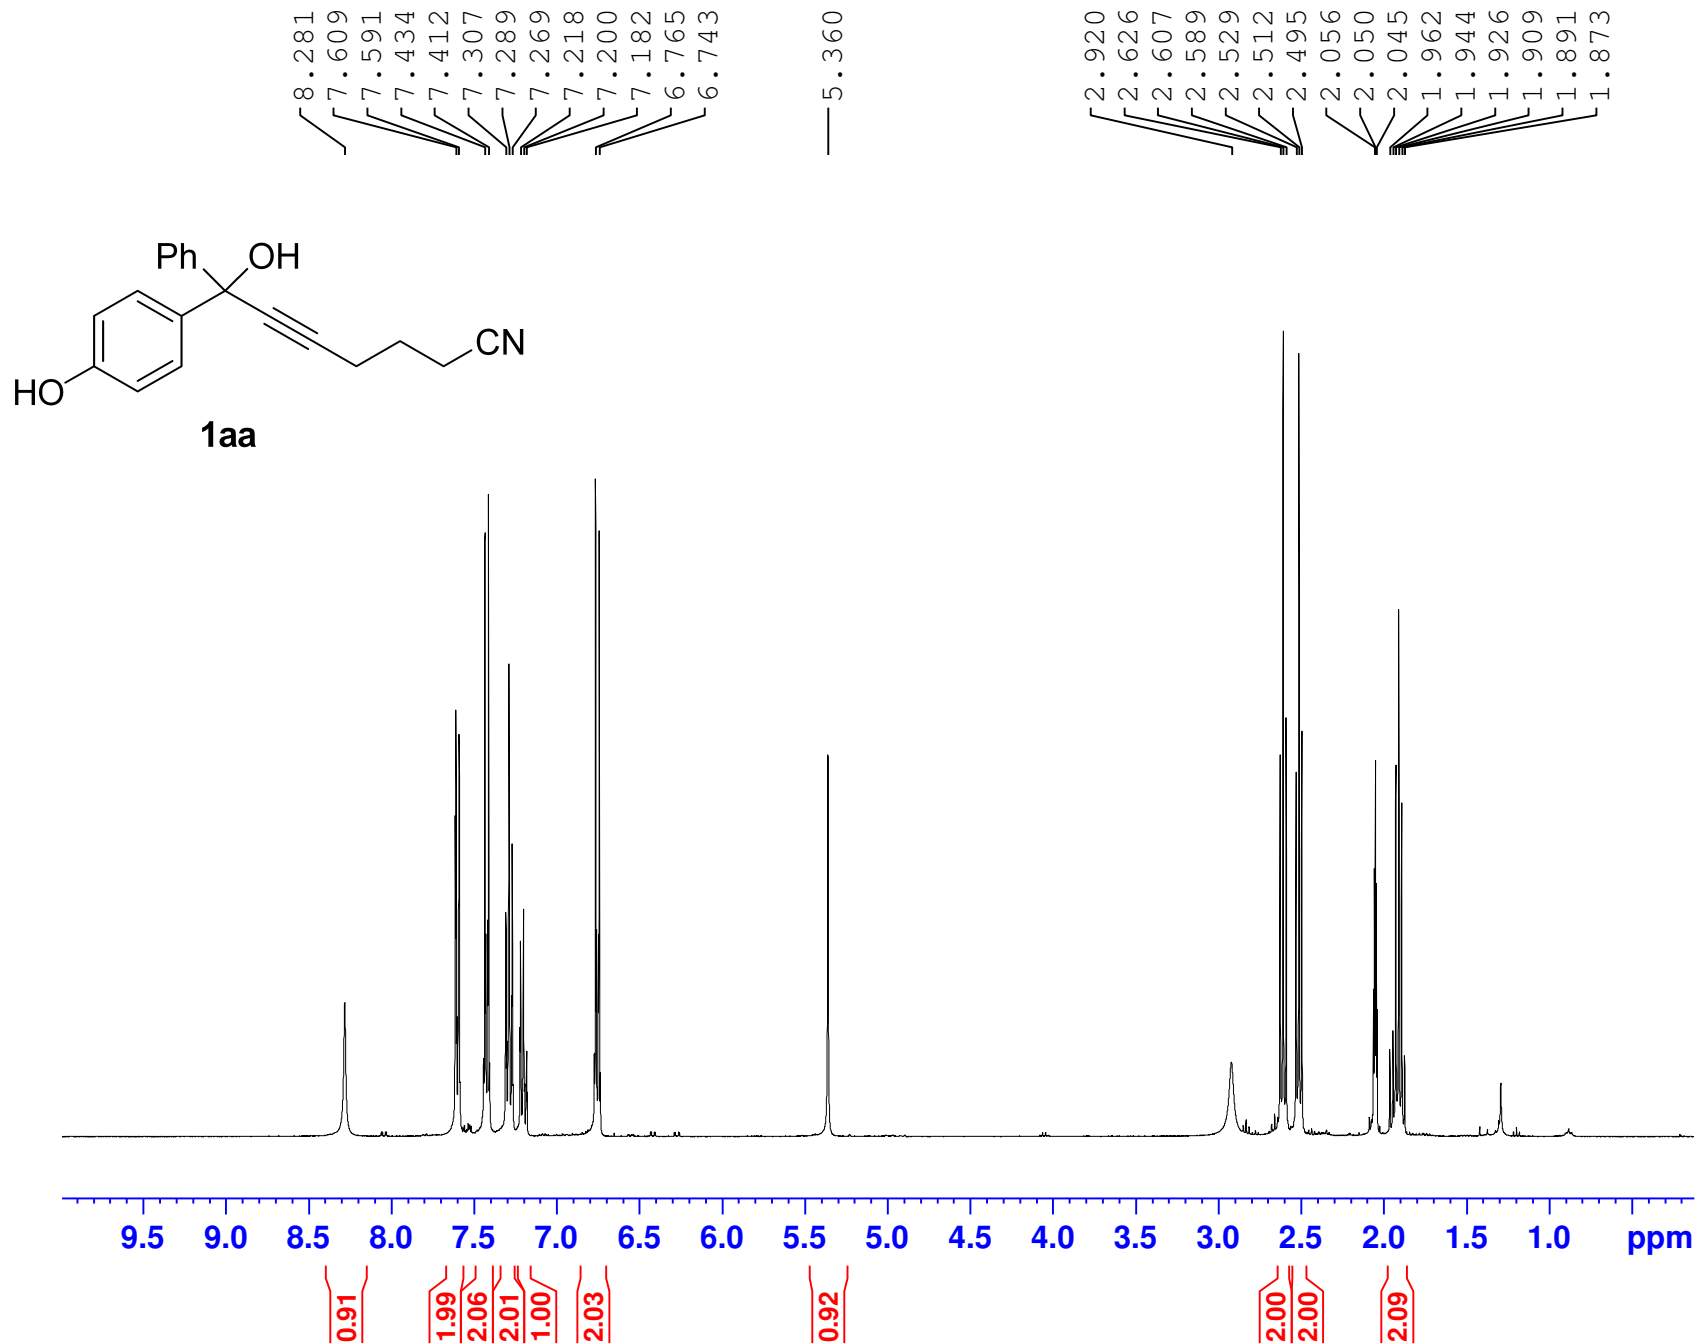

Current Data Parameters  
 NAME qdy-20123 H  
 EXPNO 2  
 PROCNO 1

F2 - Acquisition Parameters  
 Date\_ 20160422  
 Time 22.51  
 INSTRUM spect  
 PROBHD 5 mm PABBO BB/  
 PULPROG zg30  
 TD 65536  
 SOLVENT Acetone  
 NS 5  
 DS 0  
 SWH 8012.820 Hz  
 FIDRES 0.122266 Hz  
 AQ 4.0894465 sec  
 RG 112.31  
 DW 62.400 usec  
 DE 6.50 usec  
 TE 297.5 K  
 D1 1.00000000 sec  
 TD0 1

==== CHANNEL f1 =====  
 SFO1 400.1324710 MHz  
 NUC1 1H  
 P1 14.50 usec  
 PLW1 11.99499989 W

F2 - Processing parameters  
 SI 65536  
 SF 400.1300068 MHz  
 WDW EM  
 SSB 0  
 LB 0.30 Hz  
 GB 0  
 PC 1.00

Supplementary Figure 57. <sup>1</sup>H NMR spectrum for 1aa

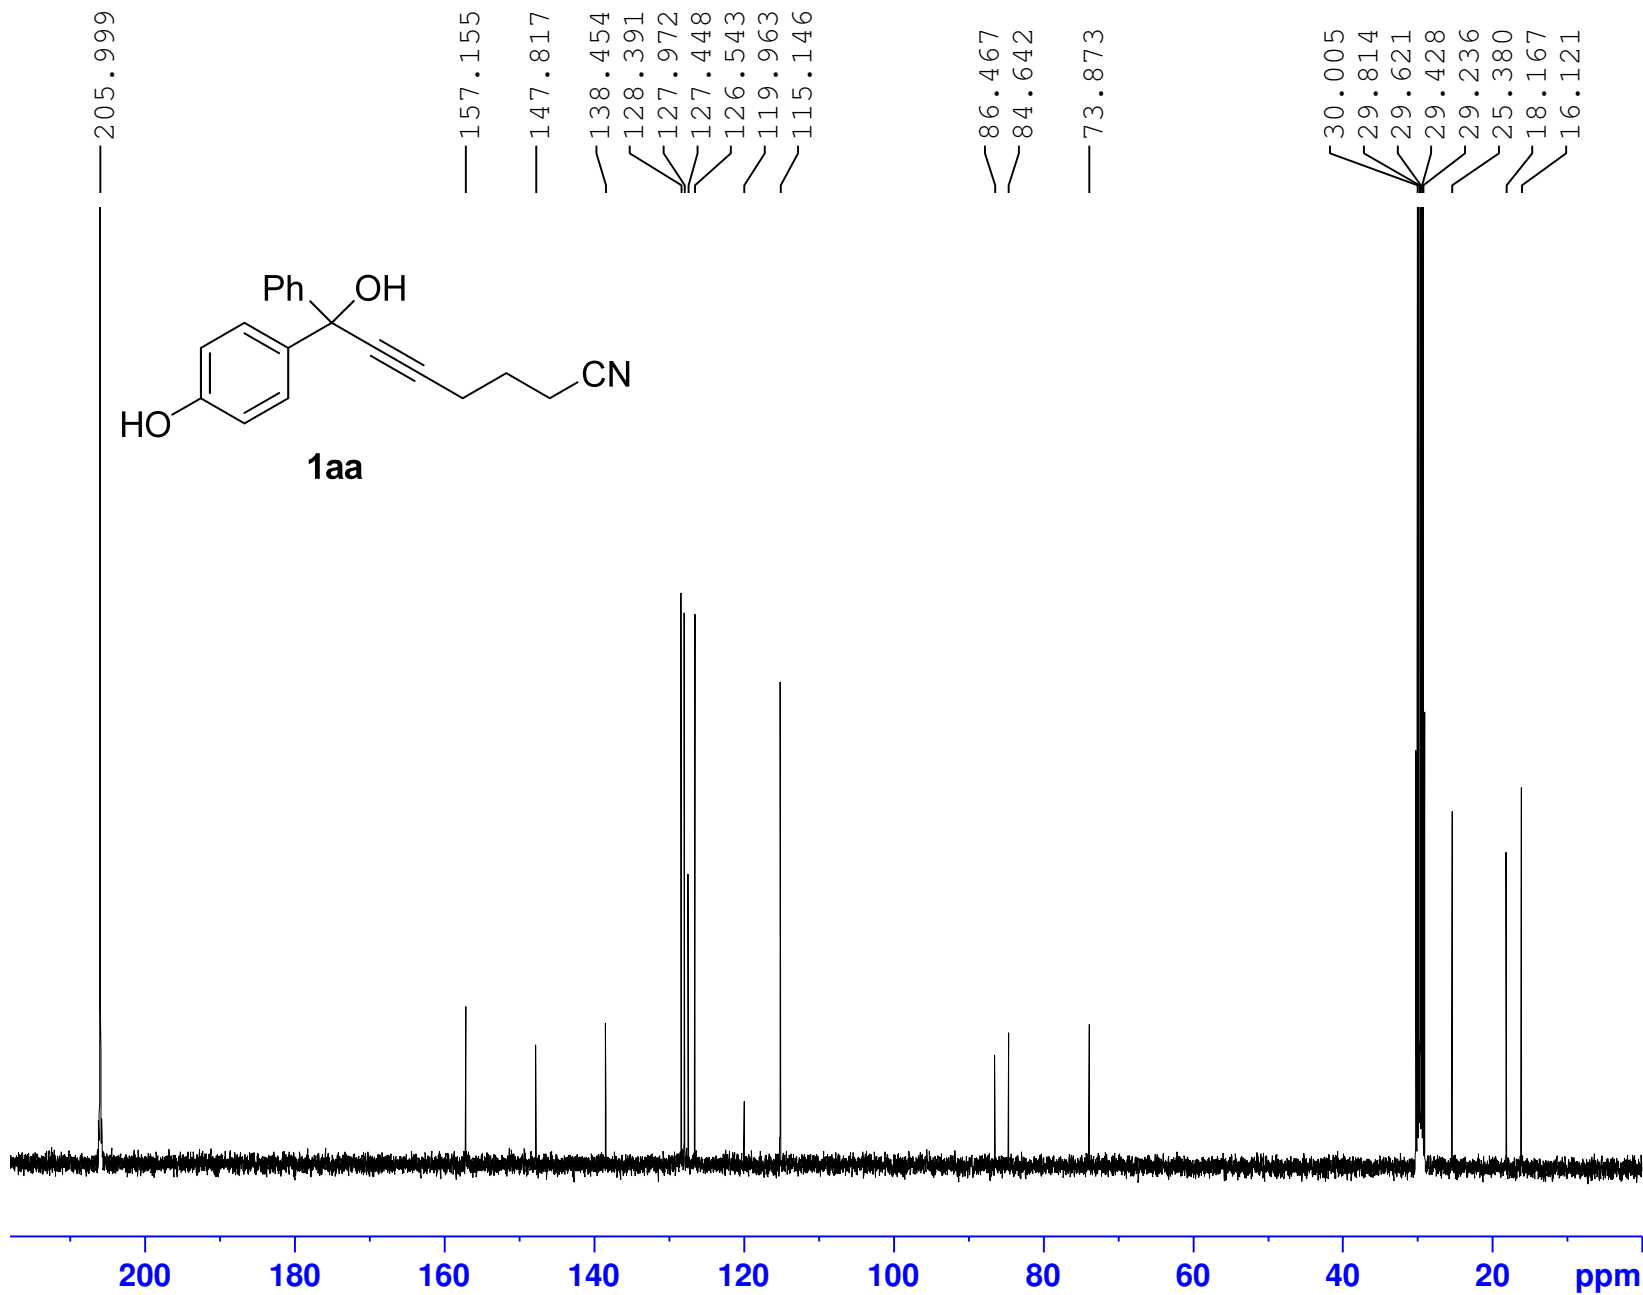

Current Data Parameters  
 NAME qdy-20123 C  
 EXPNO 2  
 PROCNO 1

F2 - Acquisition Parameters  
 Date\_ 20160422  
 Time 22.56  
 INSTRUM spect  
 PROBHD 5 mm PABBO BB/  
 PULPROG zgpg30  
 TD 65536  
 SOLVENT Acetone  
 NS 200  
 DS 0  
 SWH 24038.461 Hz  
 FIDRES 0.366798 Hz  
 AQ 1.3631488 sec  
 RG 196.92  
 DW 20.800 usec  
 DE 6.50 usec  
 TE 298.5 K  
 D1 2.00000000 sec  
 D11 0.03000000 sec  
 TD0 1

==== CHANNEL f1 =====  
 SFO1 100.6228298 MHz  
 NUC1 13C  
 P1 9.70 usec  
 PLW1 46.98899841 W

==== CHANNEL f2 =====  
 SFO2 400.1316005 MHz  
 NUC2 1H  
 CPDPRG[2] waltz16  
 PCPD2 90.00 usec  
 PLW2 11.99499989 W  
 PLW12 0.34213999 W  
 PLW13 0.27713001 W

F2 - Processing parameters  
 SI 32768  
 SF 100.6127022 MHz  
 WDW EM  
 SSB 0  
 LB 1.00 Hz  
 GB 0  
 PC 1.40

Supplementary Figure 58. <sup>13</sup>C NMR spectrum for 1aa

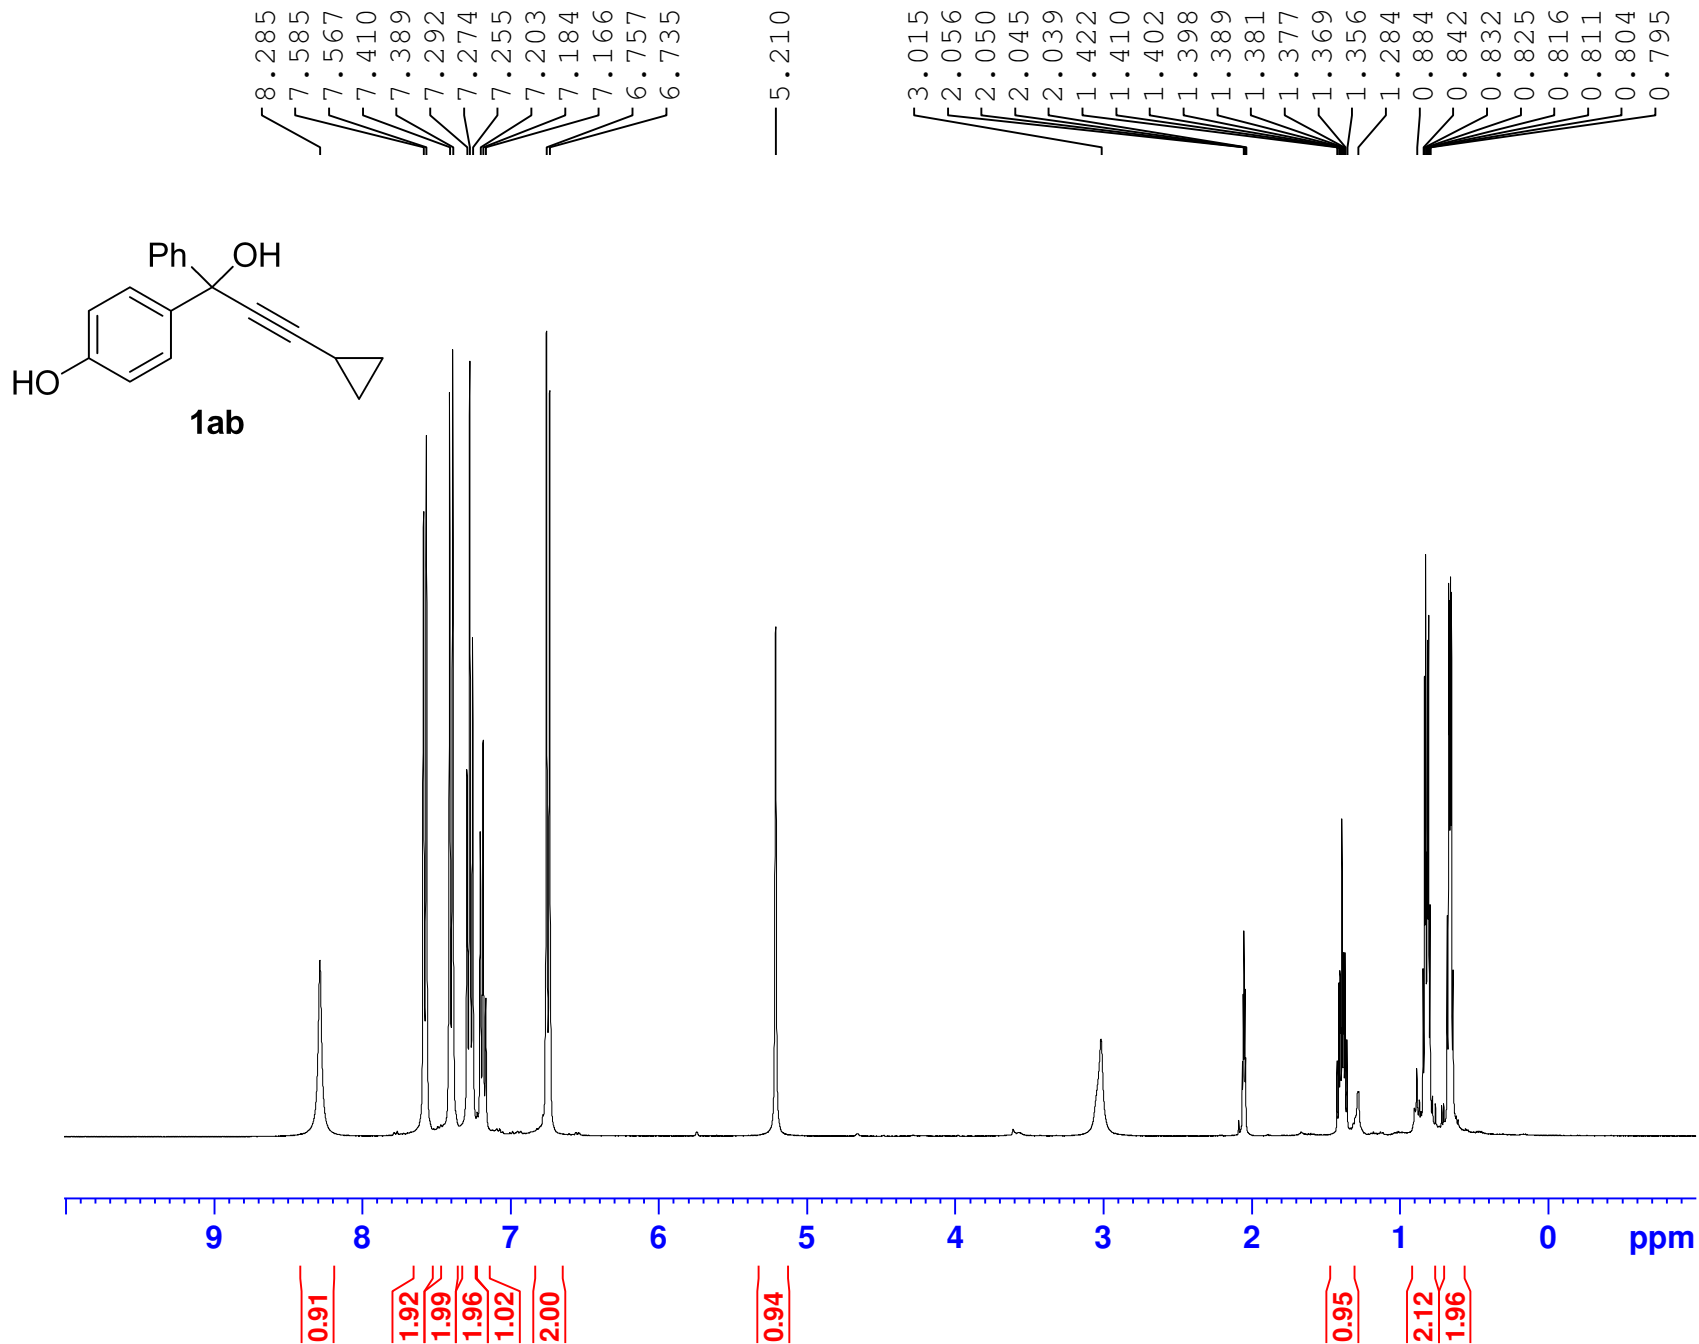

Current Data Parameters  
 NAME qdy-20071 H  
 EXPNO 1  
 PROCNO 1

F2 - Acquisition Parameters  
 Date\_ 20160309  
 Time 17.05  
 INSTRUM spect  
 PROBHD 5 mm PABBO BB/  
 PULPROG zg30  
 TD 65536  
 SOLVENT Acetone  
 NS 5  
 DS 0  
 SWH 8012.820 Hz  
 FIDRES 0.122266 Hz  
 AQ 4.0894465 sec  
 RG 34.77  
 DW 62.400 usec  
 DE 6.50 usec  
 TE 297.2 K  
 D1 1.00000000 sec  
 TD0 1

===== CHANNEL f1 =====  
 SFO1 400.1324710 MHz  
 NUC1 1H  
 P1 14.50 usec  
 PLW1 11.99499989 W

F2 - Processing parameters  
 SI 65536  
 SF 400.1300066 MHz  
 WDW EM  
 SSB 0  
 LB 0.30 Hz  
 GB 0  
 PC 1.00

Supplementary Figure 59. <sup>1</sup>H NMR spectrum for 1ab



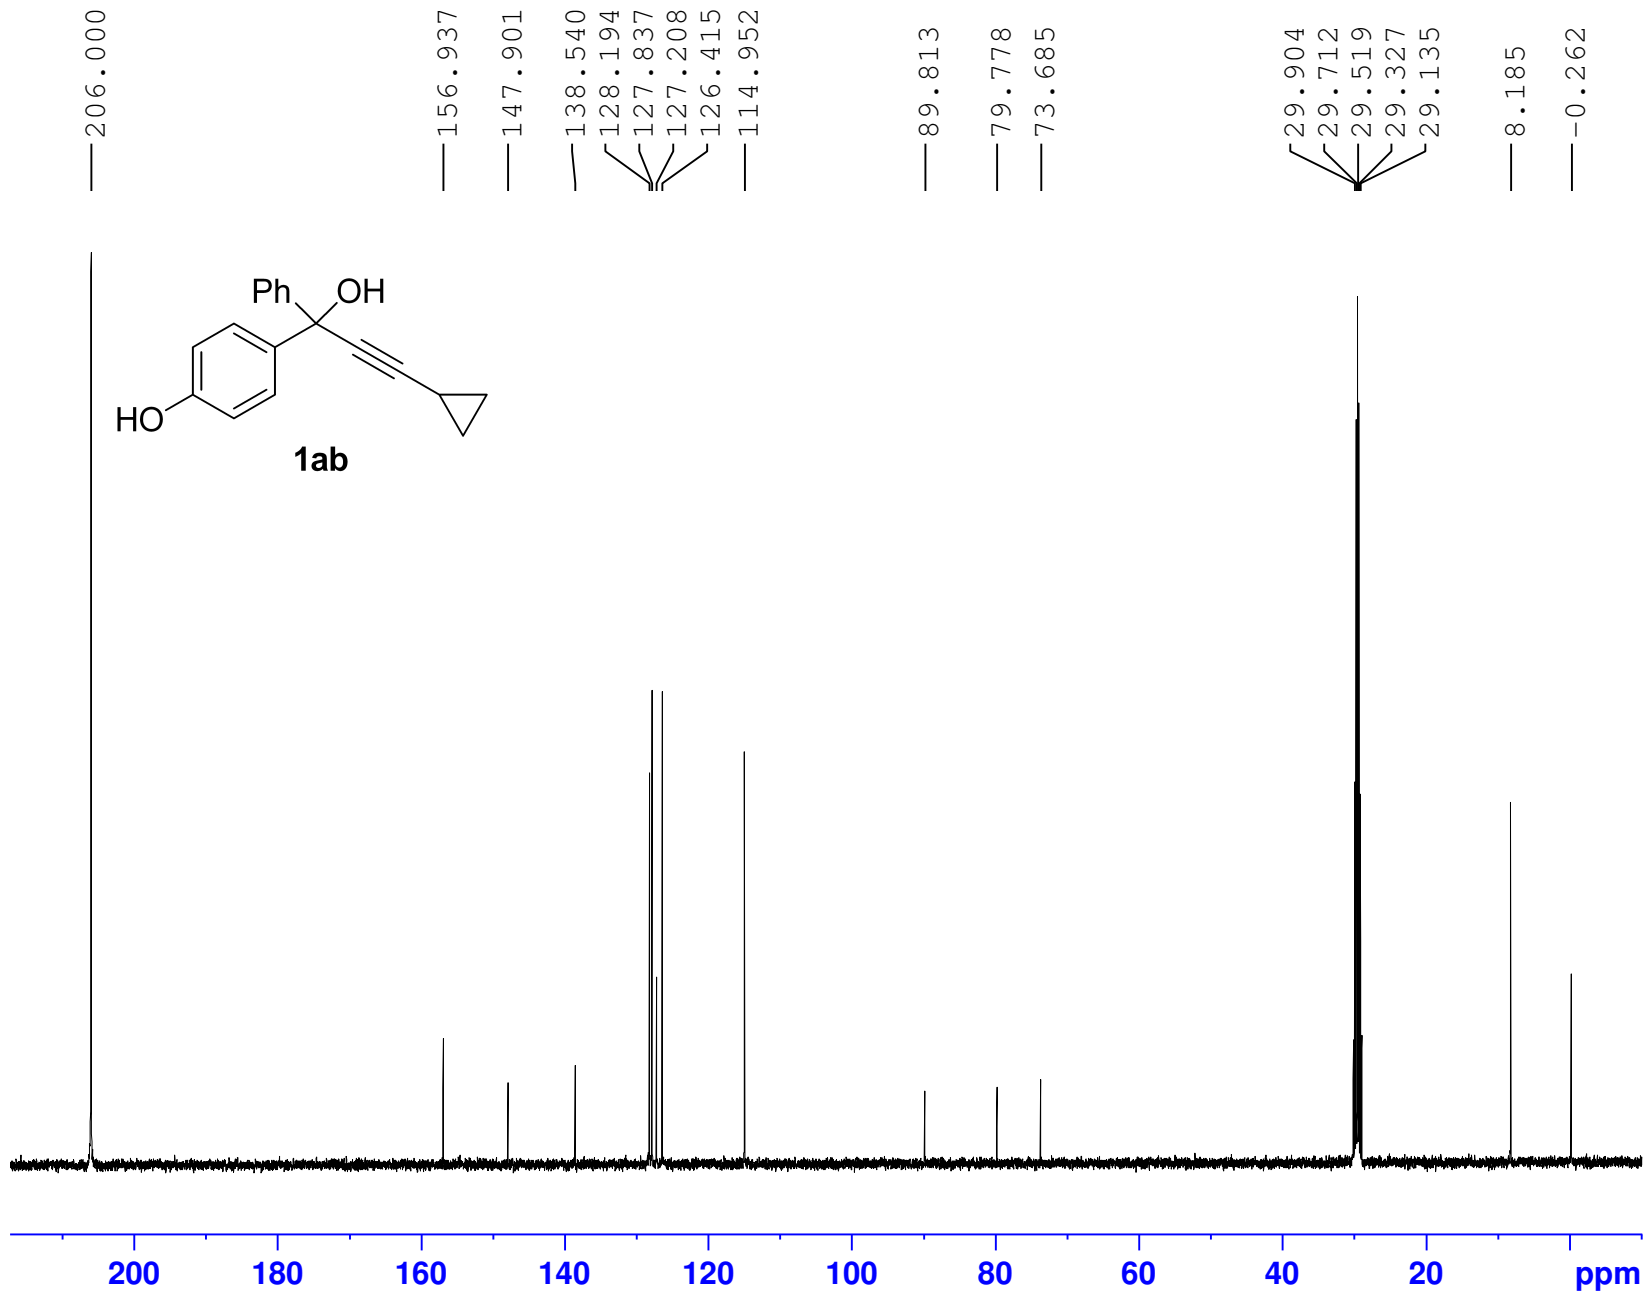

Current Data Parameters  
 NAME qdy-20071 C  
 EXPNO 1  
 PROCNO 1

F2 - Acquisition Parameters  
 Date\_ 20160309  
 Time 17.01  
 INSTRUM spect  
 PROBHD 5 mm PABBO BB/  
 PULPROG zgpg30  
 TD 65536  
 SOLVENT Acetone  
 NS 96  
 DS 0  
 SWH 24038.461 Hz  
 FIDRES 0.366798 Hz  
 AQ 1.3631488 sec  
 RG 196.92  
 DW 20.800 usec  
 DE 6.50 usec  
 TE 297.7 K  
 D1 2.00000000 sec  
 D11 0.03000000 sec  
 TD0 1

==== CHANNEL f1 =====  
 SFO1 100.6228298 MHz  
 NUC1 13C  
 P1 9.70 usec  
 PLW1 46.98899841 W

==== CHANNEL f2 =====  
 SFO2 400.1316005 MHz  
 NUC2 1H  
 CPDPRG[2] waltz16  
 PCPD2 90.00 usec  
 PLW2 11.99499989 W  
 PLW12 0.34213999 W  
 PLW13 0.27713001 W

F2 - Processing parameters  
 SI 32768  
 SF 100.6127162 MHz  
 WDW EM  
 SSB 0  
 LB 1.00 Hz  
 GB 0  
 PC 1.40

Supplementary Figure 60. <sup>13</sup>C NMR spectrum for 1ab

8.252  
7.624  
7.606  
7.452  
7.429  
7.300  
7.298  
7.280  
7.261  
7.205  
7.187  
7.168  
6.765  
6.743

— 5.228

3.024  
2.751  
2.734  
2.717  
2.699  
2.682  
2.665  
2.648  
2.061  
2.056  
2.050  
2.045  
2.039  
1.213  
1.196

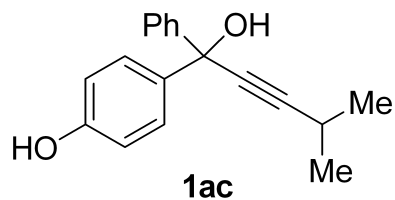

Current Data Parameters  
NAME qdy-20082-1 H  
EXPNO 5  
PROCNO 1

F2 - Acquisition Parameters  
Date\_ 20160324  
Time 20.16  
INSTRUM spect  
PROBHD 5 mm PABBO BB/  
PULPROG zg30  
TD 65536  
SOLVENT Acetone  
NS 7  
DS 0  
SWH 8012.820 Hz  
FIDRES 0.122266 Hz  
AQ 4.0894465 sec  
RG 70.97  
DW 62.400 usec  
DE 6.50 usec  
TE 297.1 K  
D1 1.00000000 sec  
TD0 1

==== CHANNEL f1 =====  
SFO1 400.1324710 MHz  
NUC1 1H  
P1 14.50 usec  
PLW1 11.99499989 W

F2 - Processing parameters  
SI 65536  
SF 400.1300067 MHz  
WDW EM  
SSB 0  
LB 0.30 Hz  
GB 0  
PC 1.00

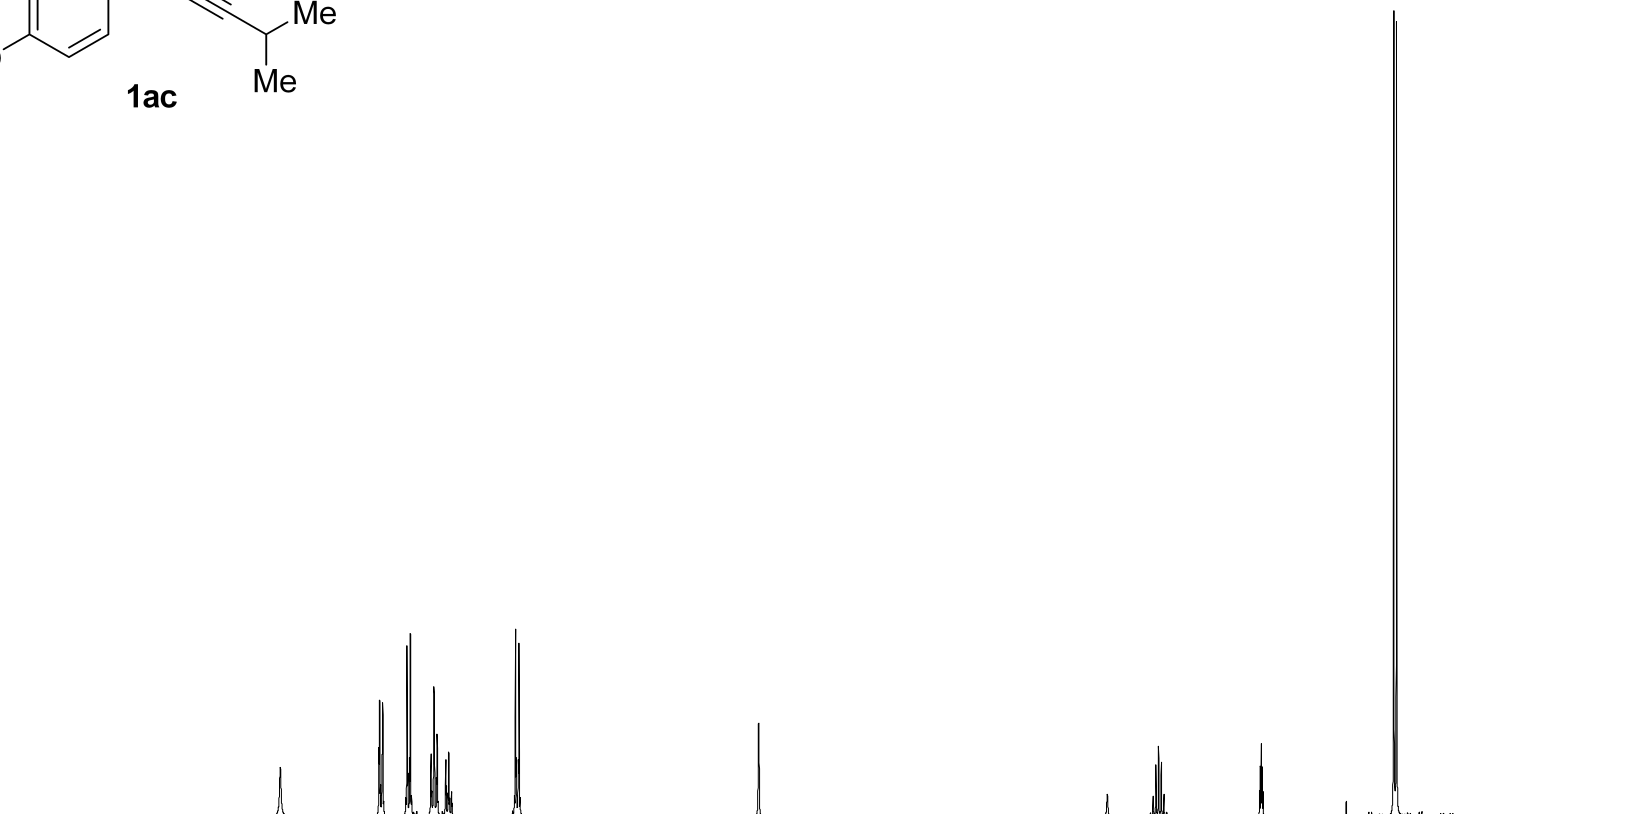

9.5 9.0 8.5 8.0 7.5 7.0 6.5 6.0 5.5 5.0 4.5 4.0 3.5 3.0 2.5 2.0 1.5 1.0 0.5 ppm

0.94  
2.01  
2.08  
2.08  
1.05  
2.09

0.92

0.97

3.00  
3.02

**Supplementary Figure 61. <sup>1</sup>H NMR spectrum for 1ac**

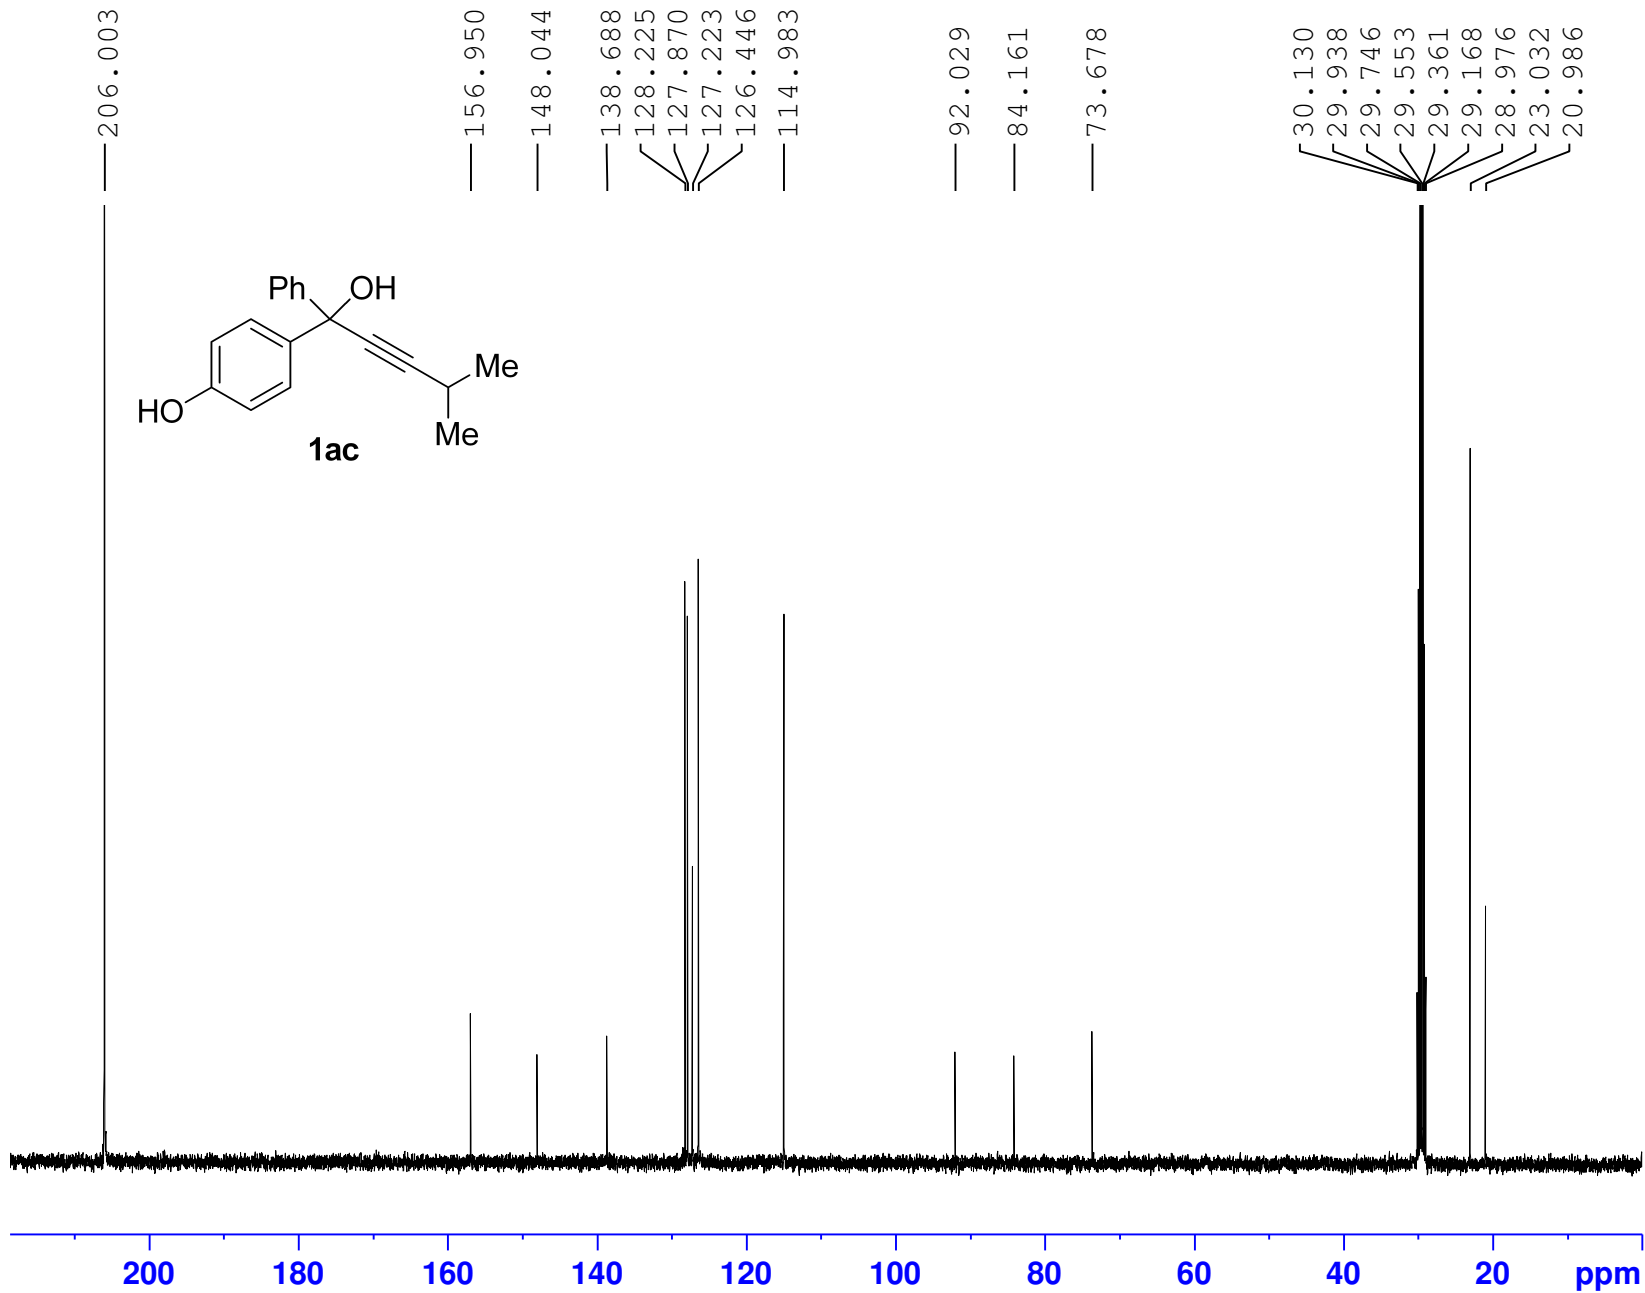

Current Data Parameters  
 NAME qdy-20082-1 C  
 EXPNO 2  
 PROCNO 1

F2 - Acquisition Parameters  
 Date\_ 20160324  
 Time 20.07  
 INSTRUM spect  
 PROBHD 5 mm PABBO BB/  
 PULPROG zgpg30  
 TD 65536  
 SOLVENT Acetone  
 NS 108  
 DS 0  
 SWH 24038.461 Hz  
 FIDRES 0.366798 Hz  
 AQ 1.3631488 sec  
 RG 196.92  
 DW 20.800 usec  
 DE 6.50 usec  
 TE 297.5 K  
 D1 2.00000000 sec  
 D11 0.03000000 sec  
 TD0 1

==== CHANNEL f1 =====  
 SFO1 100.6228298 MHz  
 NUC1 13C  
 P1 9.70 usec  
 PLW1 46.98899841 W

==== CHANNEL f2 =====  
 SFO2 400.1316005 MHz  
 NUC2 1H  
 CPDPRG[2] waltz16  
 PCPD2 90.00 usec  
 PLW2 11.99499989 W  
 PLW12 0.34213999 W  
 PLW13 0.27713001 W

F2 - Processing parameters  
 SI 32768  
 SF 100.6127125 MHz  
 WDW EM  
 SSB 0  
 LB 1.00 Hz  
 GB 0  
 PC 1.40

Supplementary Figure 62. <sup>13</sup>C NMR spectrum for 1ac

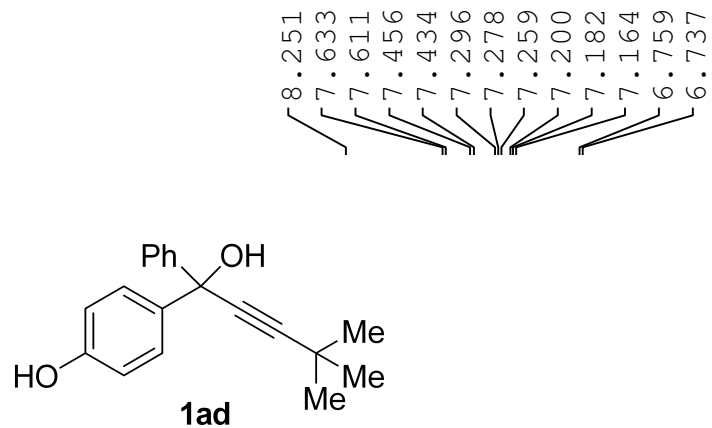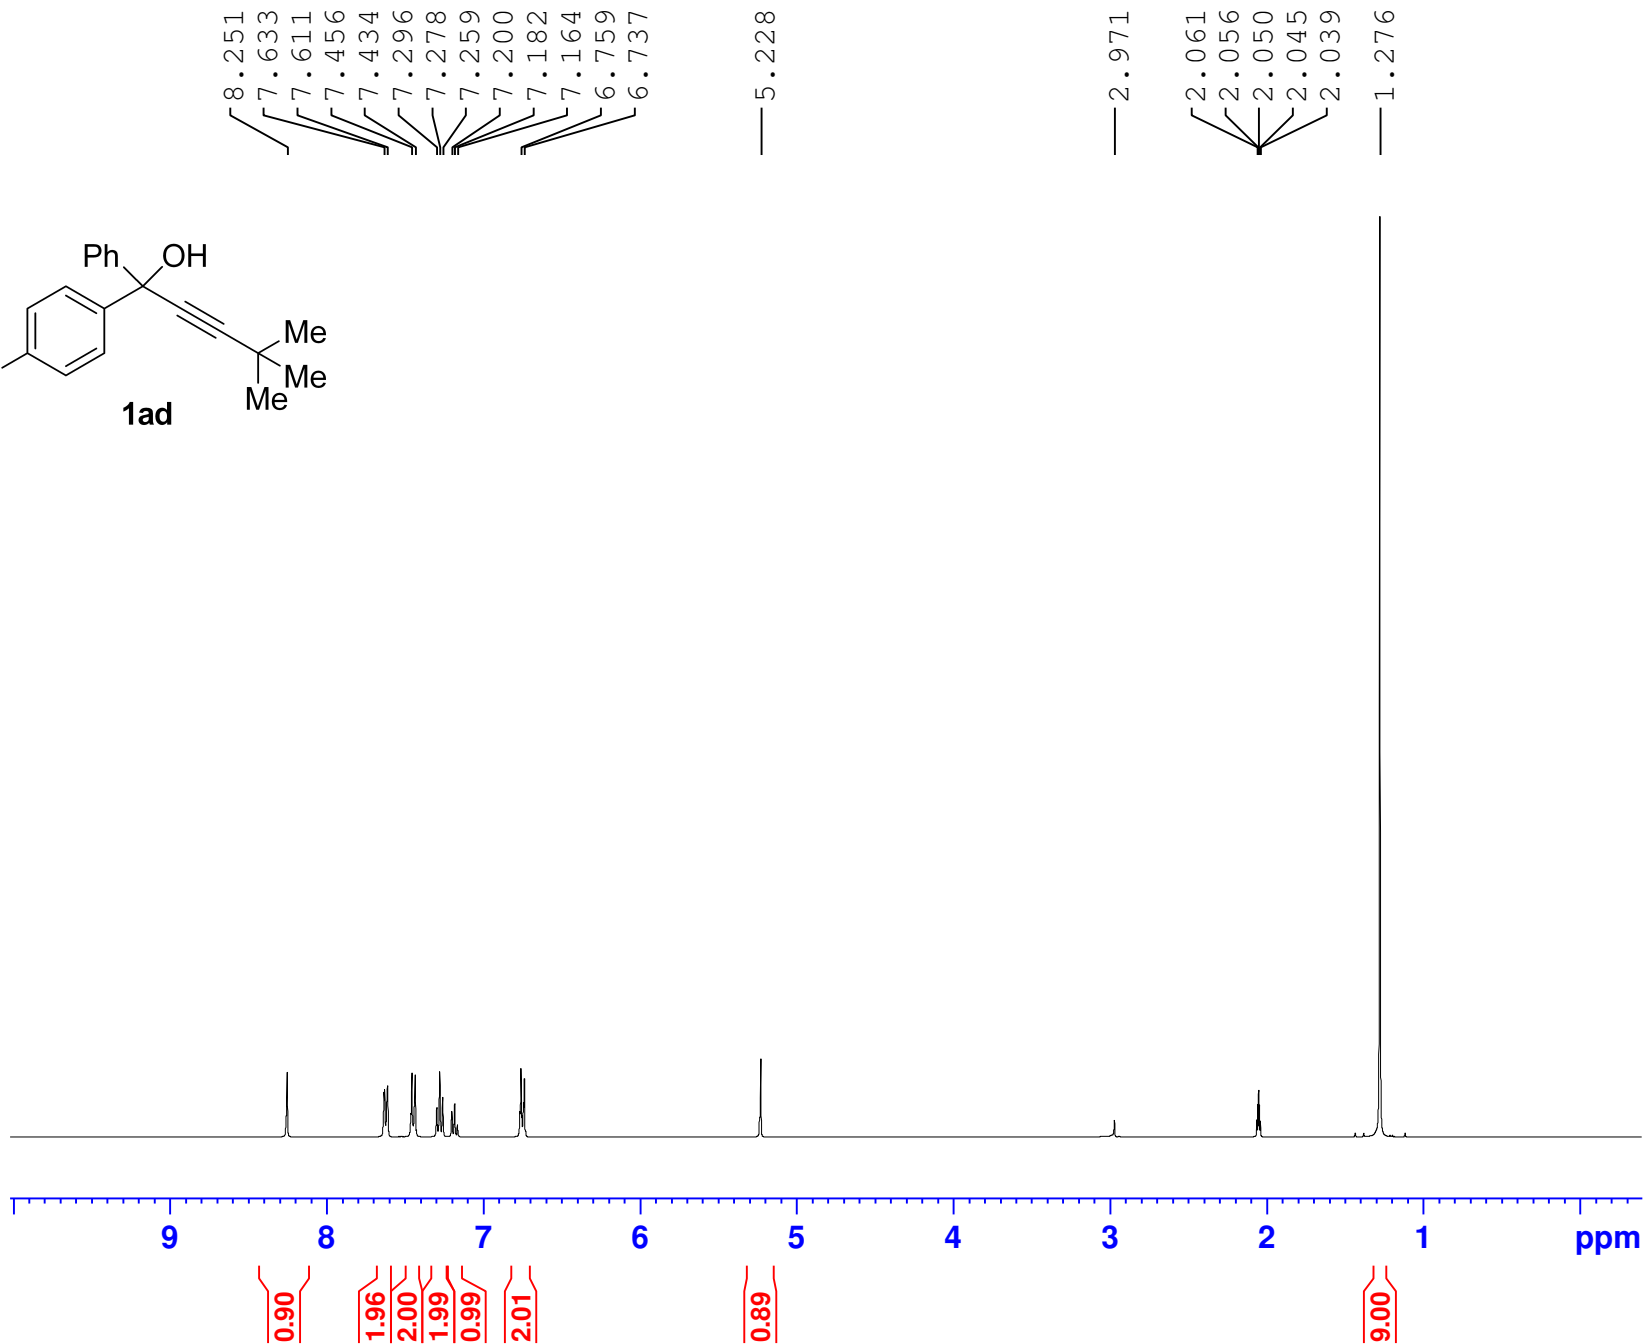

Current Data Parameters  
 NAME qdy-10194 H  
 EXPNO 2  
 PROCNO 1

F2 - Acquisition Parameters  
 Date\_ 20160328  
 Time 21.55  
 INSTRUM spect  
 PROBHD 5 mm PABBO BB/  
 PULPROG zg30  
 TD 65536  
 SOLVENT Acetone  
 NS 7  
 DS 0  
 SWH 8012.820 Hz  
 FIDRES 0.122266 Hz  
 AQ 4.0894465 sec  
 RG 62.93  
 DW 62.400 usec  
 DE 6.50 usec  
 TE 297.3 K  
 D1 1.00000000 sec  
 TD0 1

==== CHANNEL f1 =====  
 SFO1 400.1324710 MHz  
 NUC1 1H  
 P1 14.50 usec  
 PLW1 11.99499989 W

F2 - Processing parameters  
 SI 65536  
 SF 400.1300066 MHz  
 WDW EM  
 SSB 0  
 LB 0.30 Hz  
 GB 0  
 PC 1.00

Supplementary Figure 63. <sup>1</sup>H NMR spectrum for 1ad

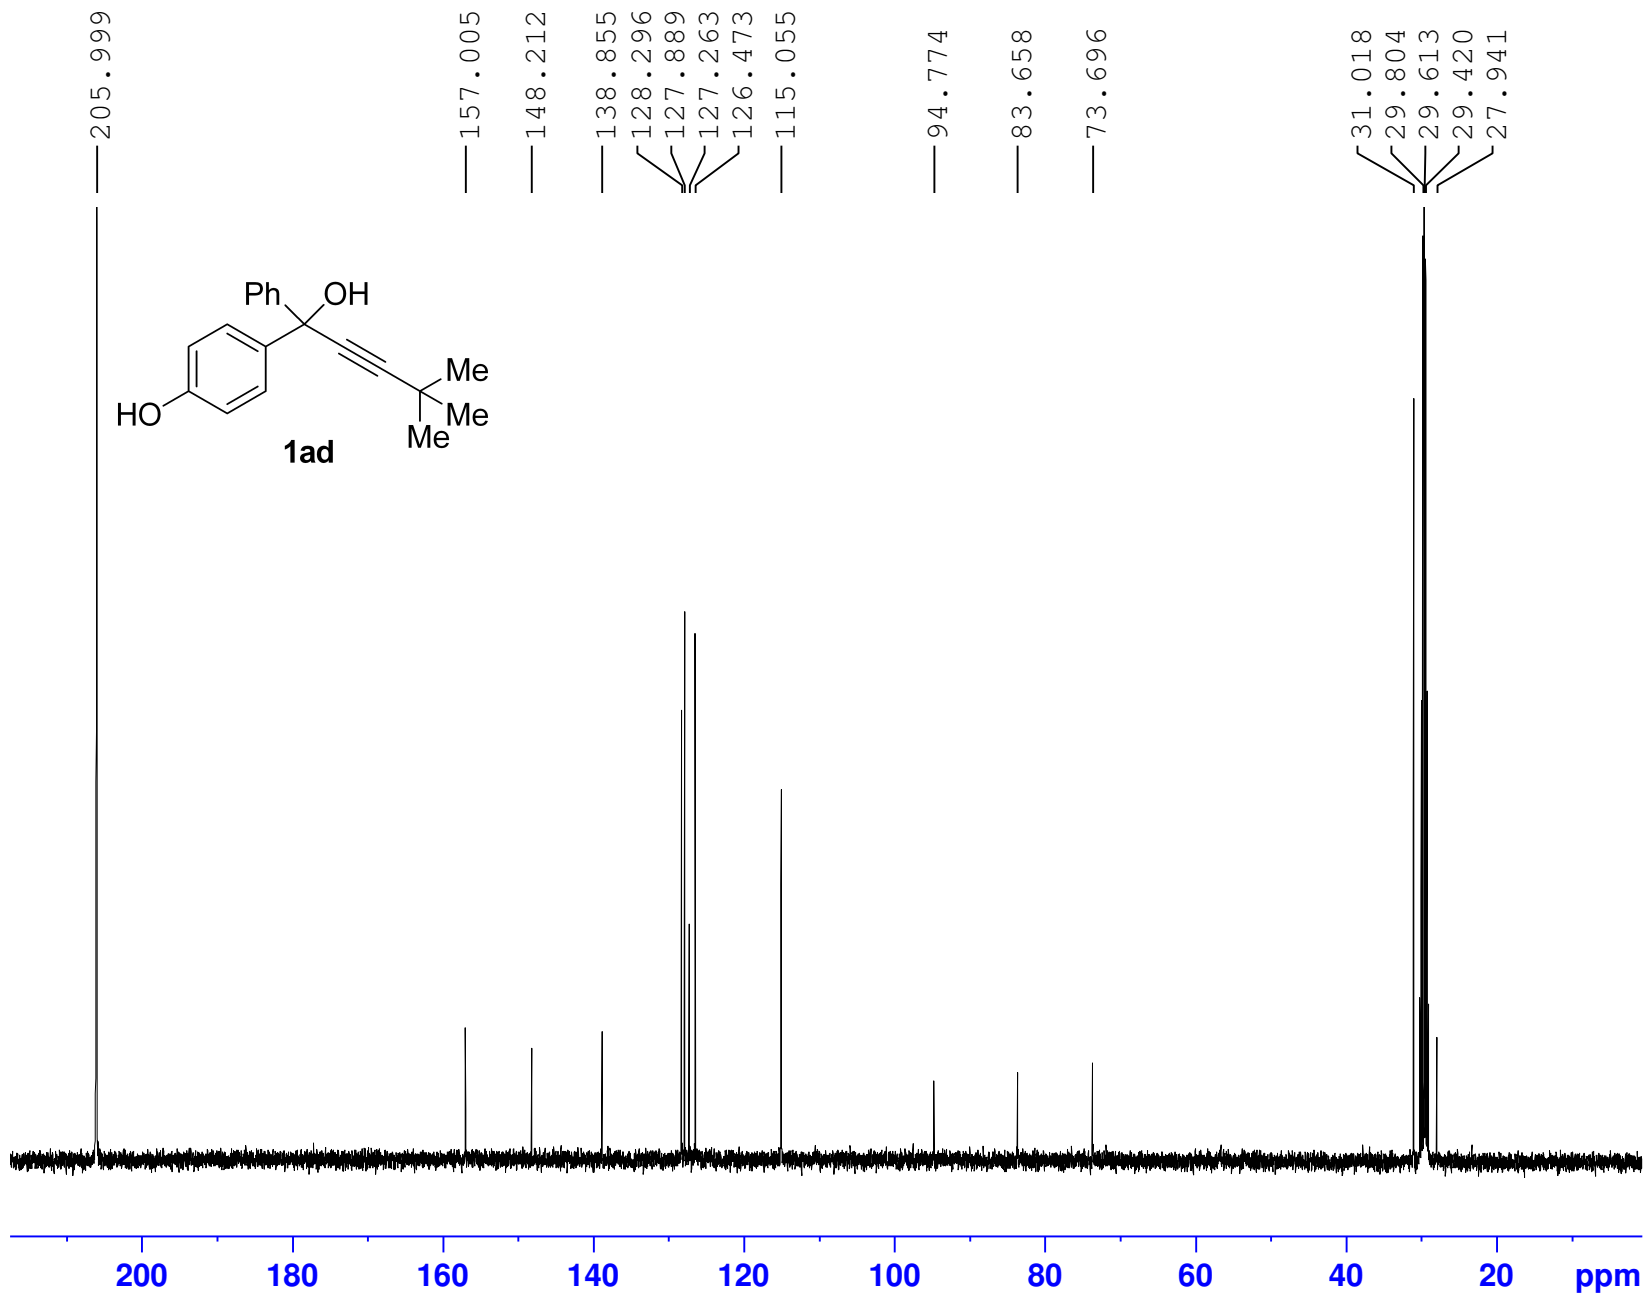

Current Data Parameters  
 NAME qdy-10194 C  
 EXPNO 2  
 PROCNO 1

F2 - Acquisition Parameters  
 Date\_ 20160328  
 Time 22.02  
 INSTRUM spect  
 PROBHD 5 mm PABBO BB/  
 PULPROG zgpg30  
 TD 65536  
 SOLVENT Acetone  
 NS 130  
 DS 0  
 SWH 24038.461 Hz  
 FIDRES 0.366798 Hz  
 AQ 1.3631488 sec  
 RG 196.92  
 DW 20.800 usec  
 DE 6.50 usec  
 TE 298.4 K  
 D1 2.00000000 sec  
 D11 0.03000000 sec  
 TD0 1

==== CHANNEL f1 =====  
 SFO1 100.6228298 MHz  
 NUC1 13C  
 P1 9.70 usec  
 PLW1 46.98899841 W

==== CHANNEL f2 =====  
 SFO2 400.1316005 MHz  
 NUC2 1H  
 CPDPRG[2] waltz16  
 PCPD2 90.00 usec  
 PLW2 11.99499989 W  
 PLW12 0.34213999 W  
 PLW13 0.27713001 W

F2 - Processing parameters  
 SI 32768  
 SF 100.6127049 MHz  
 WDW EM  
 SSB 0  
 LB 1.00 Hz  
 GB 0  
 PC 1.40

Supplementary Figure 64. <sup>13</sup>C NMR spectrum for 1ad

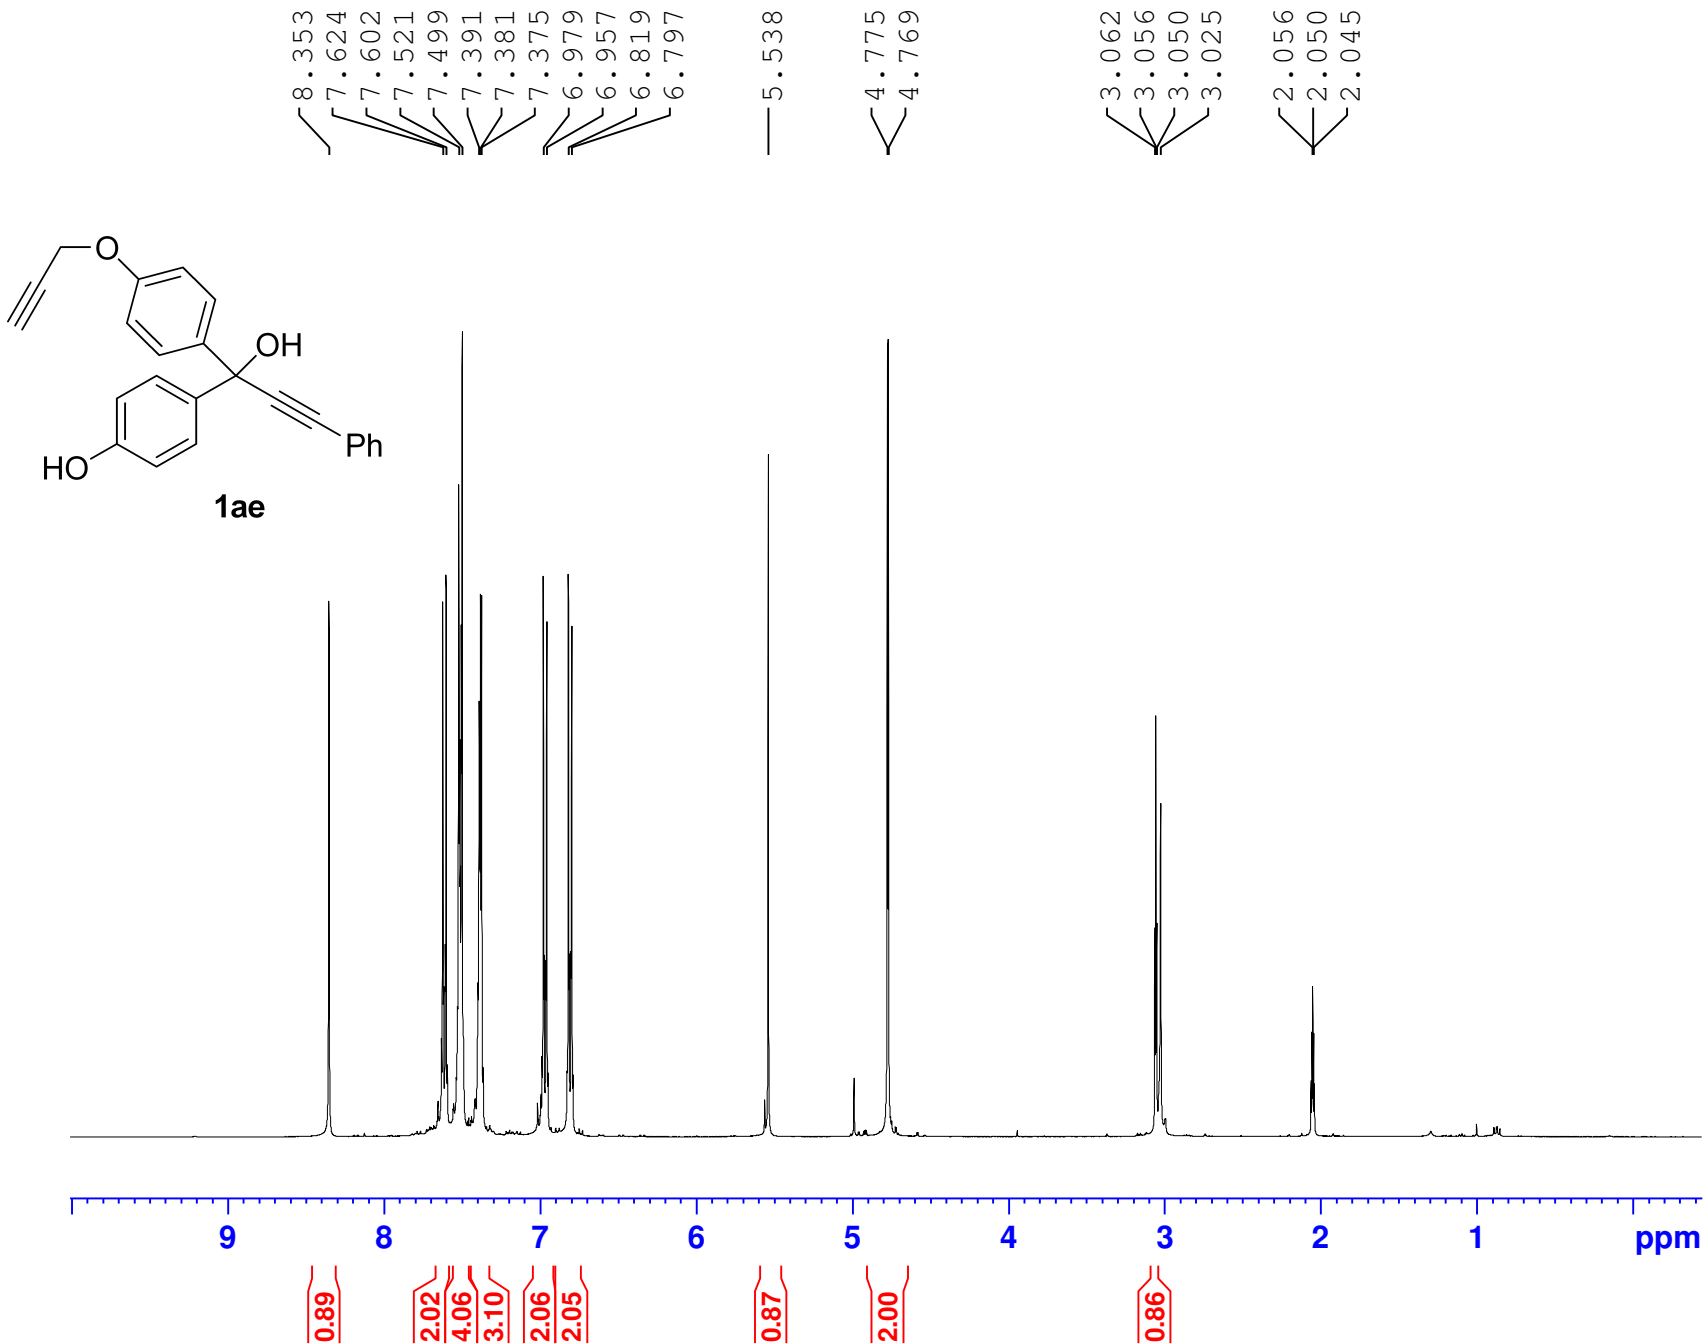

Current Data Parameters  
 NAME qdy-20068 H  
 EXPNO 2  
 PROCNO 1

F2 - Acquisition Parameters  
 Date\_ 20160310  
 Time 19.40  
 INSTRUM spect  
 PROBHD 5 mm PABBO BB/  
 PULPROG zg30  
 TD 65536  
 SOLVENT Acetone  
 NS 12  
 DS 0  
 SWH 8012.820 Hz  
 FIDRES 0.122266 Hz  
 AQ 4.0894465 sec  
 RG 49.32  
 DW 62.400 usec  
 DE 6.50 usec  
 TE 296.5 K  
 D1 1.00000000 sec  
 TD0 1

==== CHANNEL f1 =====  
 SFO1 400.1324710 MHz  
 NUC1 1H  
 P1 14.50 usec  
 PLW1 11.99499989 W

F2 - Processing parameters  
 SI 65536  
 SF 400.1300066 MHz  
 WDW EM  
 SSB 0  
 LB 0.30 Hz  
 GB 0  
 PC 1.00

Supplementary Figure 65. <sup>1</sup>H NMR spectrum for 1ae

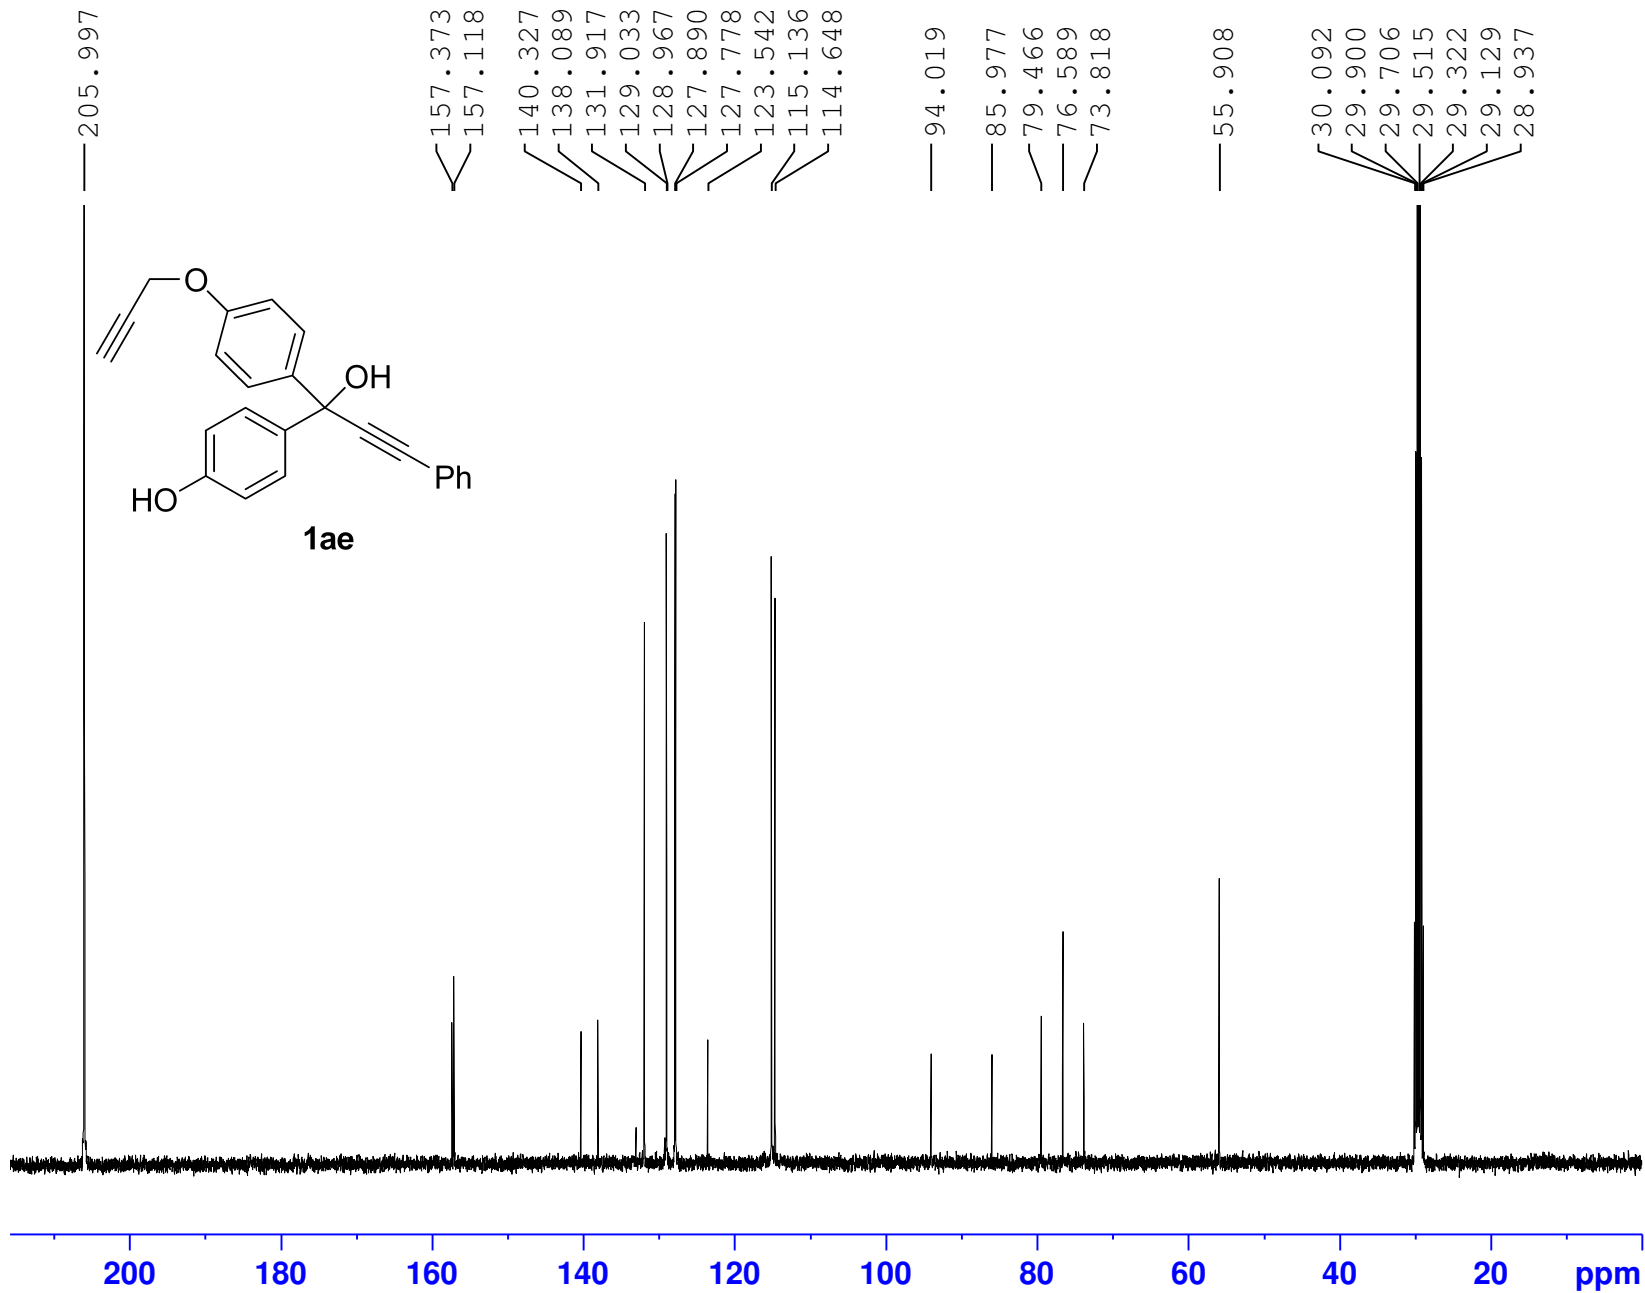

Current Data Parameters  
 NAME qdy-20068 C  
 EXPNO 2  
 PROCNO 1

F2 - Acquisition Parameters  
 Date\_ 20160310  
 Time 19.46  
 INSTRUM spect  
 PROBHD 5 mm PABBO BB/  
 PULPROG zgpg30  
 TD 65536  
 SOLVENT Acetone  
 NS 115  
 DS 0  
 SWH 24038.461 Hz  
 FIDRES 0.366798 Hz  
 AQ 1.3631488 sec  
 RG 196.92  
 DW 20.800 usec  
 DE 6.50 usec  
 TE 297.5 K  
 D1 2.00000000 sec  
 D11 0.03000000 sec  
 TD0 1

==== CHANNEL f1 =====  
 SFO1 100.6228298 MHz  
 NUC1 13C  
 P1 9.70 usec  
 PLW1 46.98899841 W

==== CHANNEL f2 =====  
 SFO2 400.1316005 MHz  
 NUC2 1H  
 CPDPRG[2] waltz16  
 PCPD2 90.00 usec  
 PLW2 11.99499989 W  
 PLW12 0.34213999 W  
 PLW13 0.27713001 W

F2 - Processing parameters  
 SI 32768  
 SF 100.6127177 MHz  
 WDW EM  
 SSB 0  
 LB 1.00 Hz  
 GB 0  
 PC 1.40

Supplementary Figure 66. <sup>13</sup>C NMR spectrum for 1ae

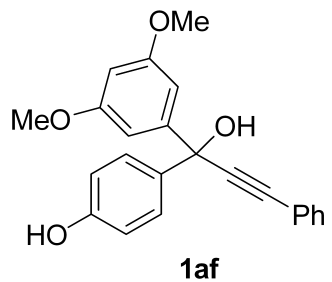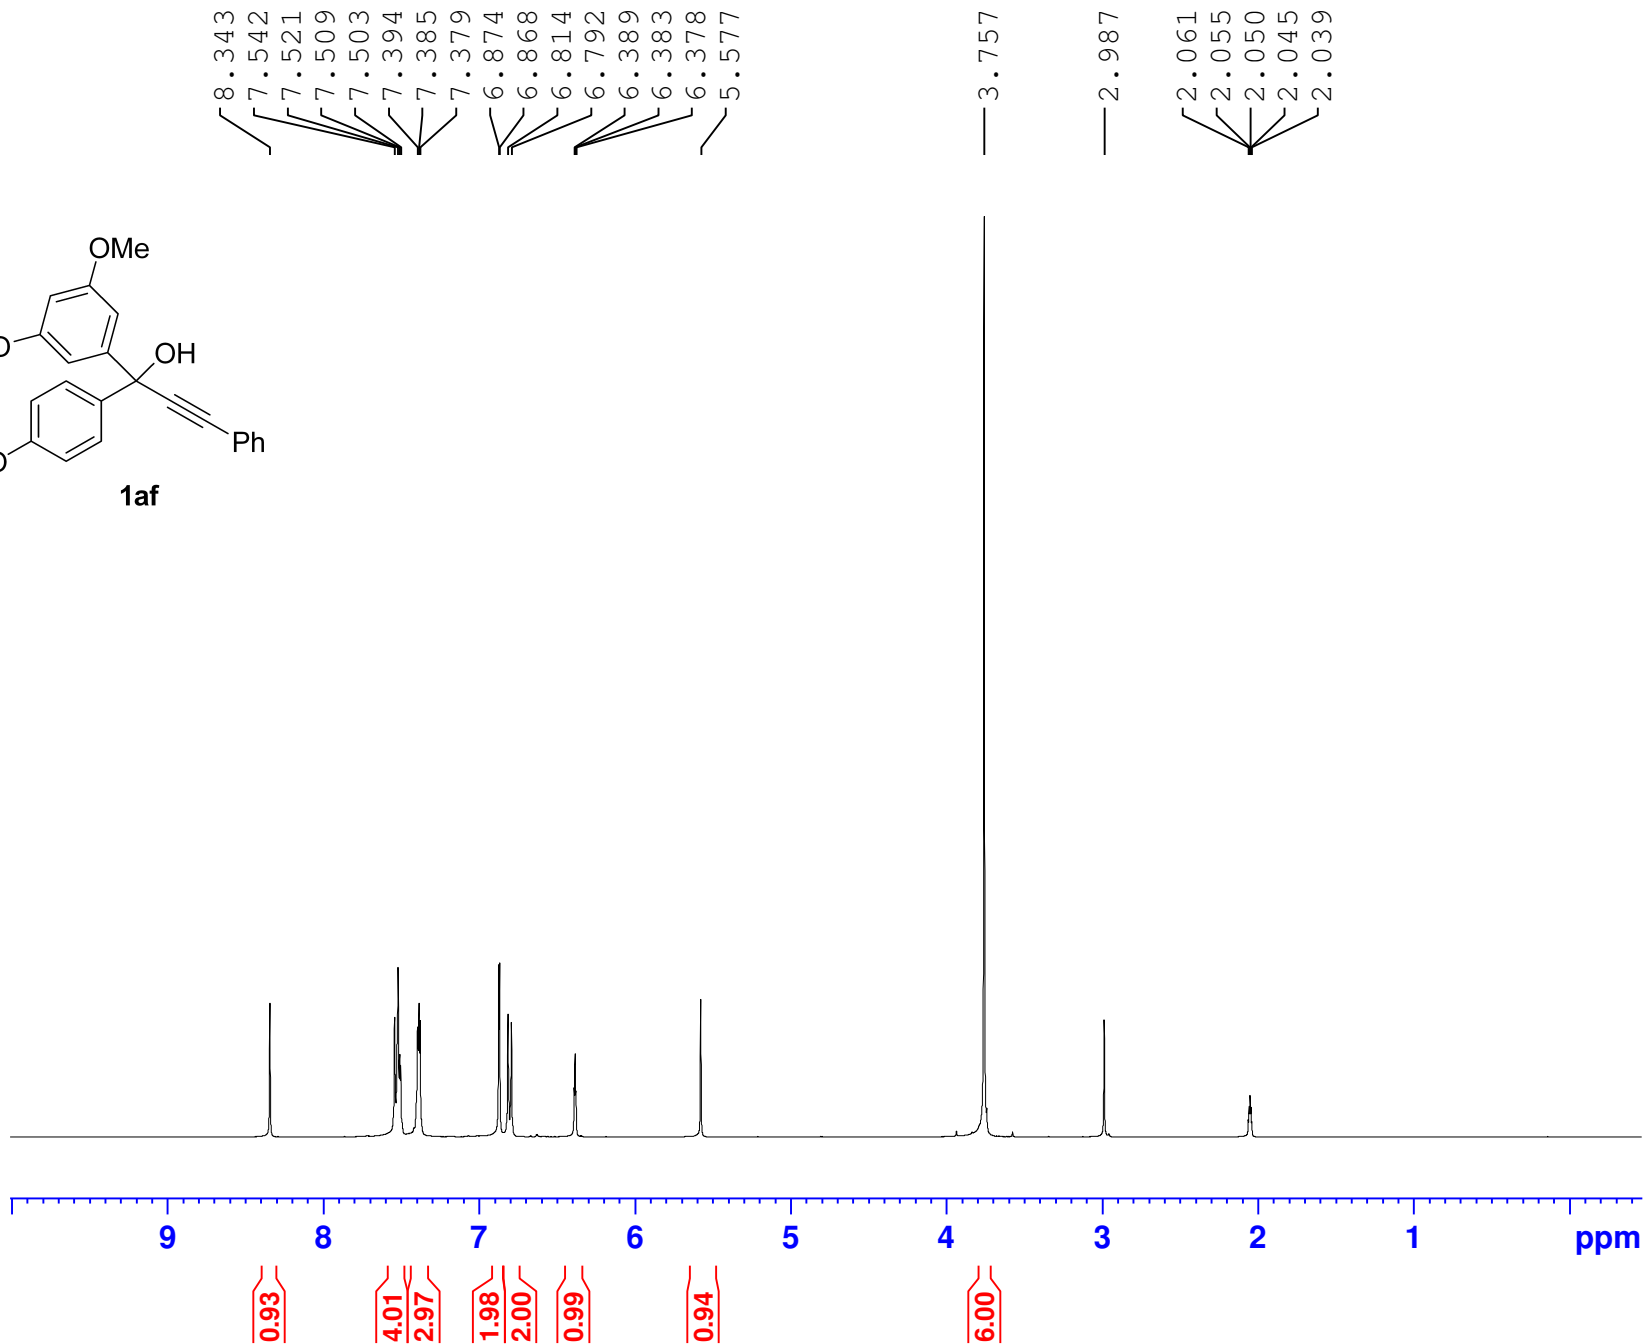

Current Data Parameters  
 NAME qdy-20126 H  
 EXPNO 1  
 PROCNO 1

F2 - Acquisition Parameters  
 Date\_ 20160428  
 Time 19.38  
 INSTRUM spect  
 PROBHD 5 mm PABBO BB/  
 PULPROG zg30  
 TD 65536  
 SOLVENT Acetone  
 NS 8  
 DS 0  
 SWH 8012.820 Hz  
 FIDRES 0.122266 Hz  
 AQ 4.0894465 sec  
 RG 62.93  
 DW 62.400 usec  
 DE 6.50 usec  
 TE 297.0 K  
 D1 1.00000000 sec  
 TD0 1

==== CHANNEL f1 =====  
 SFO1 400.1324710 MHz  
 NUC1 1H  
 P1 14.50 usec  
 PLW1 11.99499989 W

F2 - Processing parameters  
 SI 65536  
 SF 400.1300065 MHz  
 WDW EM  
 SSB 0  
 LB 0.30 Hz  
 GB 0  
 PC 1.00

Supplementary Figure 67. <sup>1</sup>H NMR spectrum for 1af



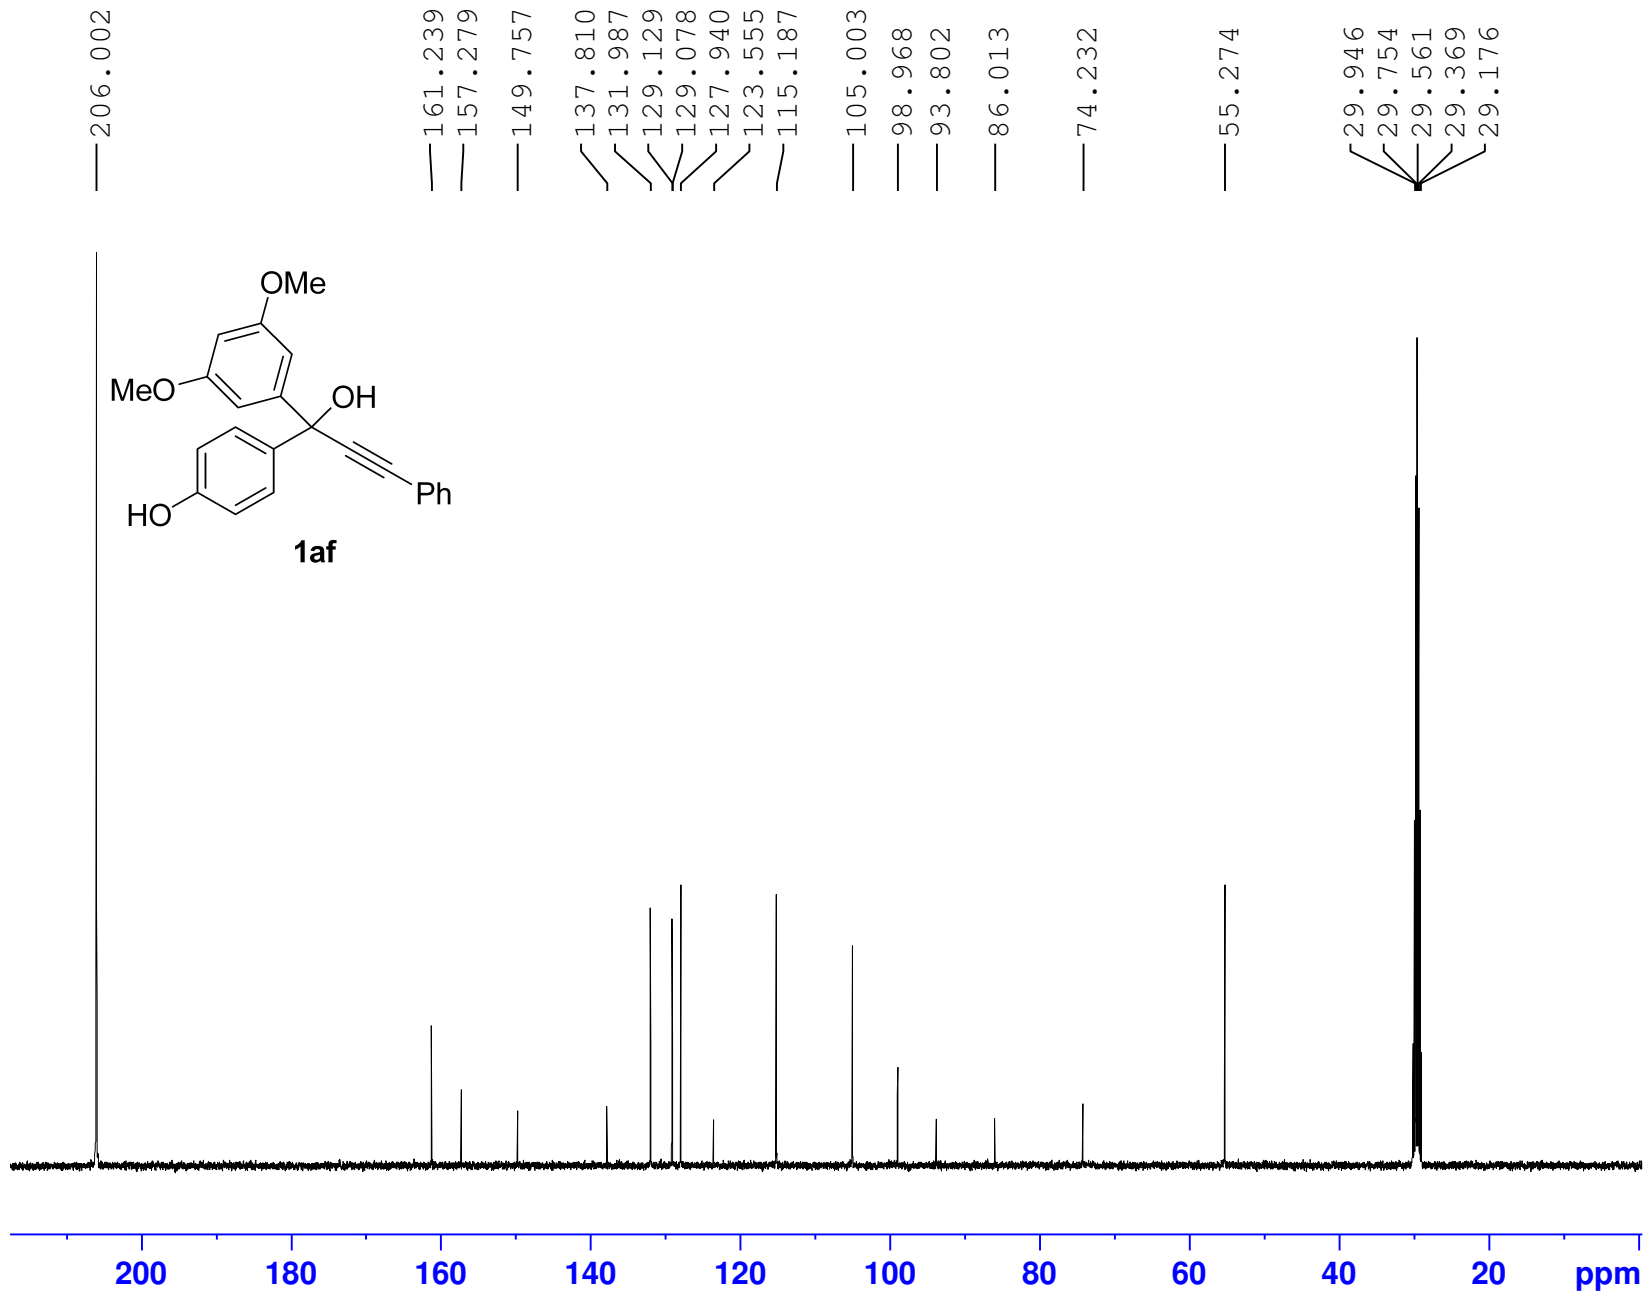

Current Data Parameters  
 NAME qdy-20126 C  
 EXPNO 1  
 PROCNO 1

F2 - Acquisition Parameters  
 Date\_ 20160428  
 Time 19.42  
 INSTRUM spect  
 PROBHD 5 mm PABBO BB/  
 PULPROG zgpg30  
 TD 65536  
 SOLVENT Acetone  
 NS 105  
 DS 0  
 SWH 24038.461 Hz  
 FIDRES 0.366798 Hz  
 AQ 1.3631488 sec  
 RG 196.92  
 DW 20.800 usec  
 DE 6.50 usec  
 TE 297.8 K  
 D1 2.00000000 sec  
 D11 0.03000000 sec  
 TD0 1

==== CHANNEL f1 =====  
 SFO1 100.6228298 MHz  
 NUC1 13C  
 P1 9.70 usec  
 PLW1 46.98899841 W

==== CHANNEL f2 =====  
 SFO2 400.1316005 MHz  
 NUC2 1H  
 CPDPRG[2] waltz16  
 PCPD2 90.00 usec  
 PLW2 11.99499989 W  
 PLW12 0.34213999 W  
 PLW13 0.27713001 W

F2 - Processing parameters  
 SI 32768  
 SF 100.6127103 MHz  
 WDW EM  
 SSB 0  
 LB 1.00 Hz  
 GB 0  
 PC 1.40

Supplementary Figure 68. <sup>13</sup>C NMR spectrum for 1af

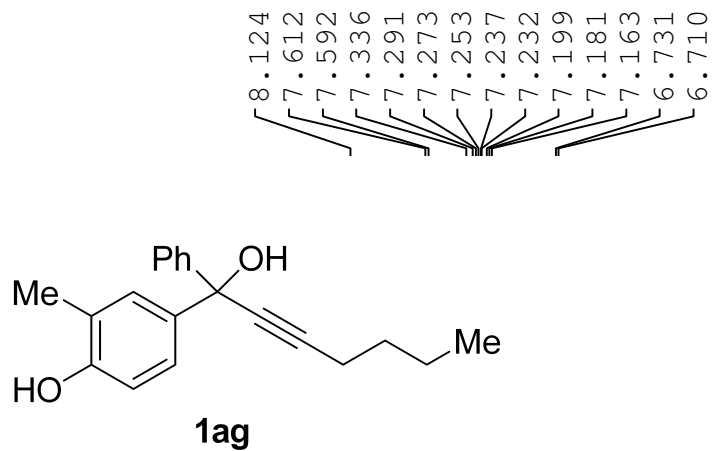

8.124  
7.612  
7.592  
7.336  
7.291  
7.273  
7.253  
7.237  
7.232  
7.199  
7.181  
7.163  
6.731  
6.710

5.160

2.969  
2.341  
2.324  
2.307  
2.158  
2.056  
2.050  
2.045  
1.581  
1.564  
1.543  
1.527  
1.509  
1.498  
1.482  
1.480  
1.462  
1.443  
1.425  
0.941  
0.923  
0.905

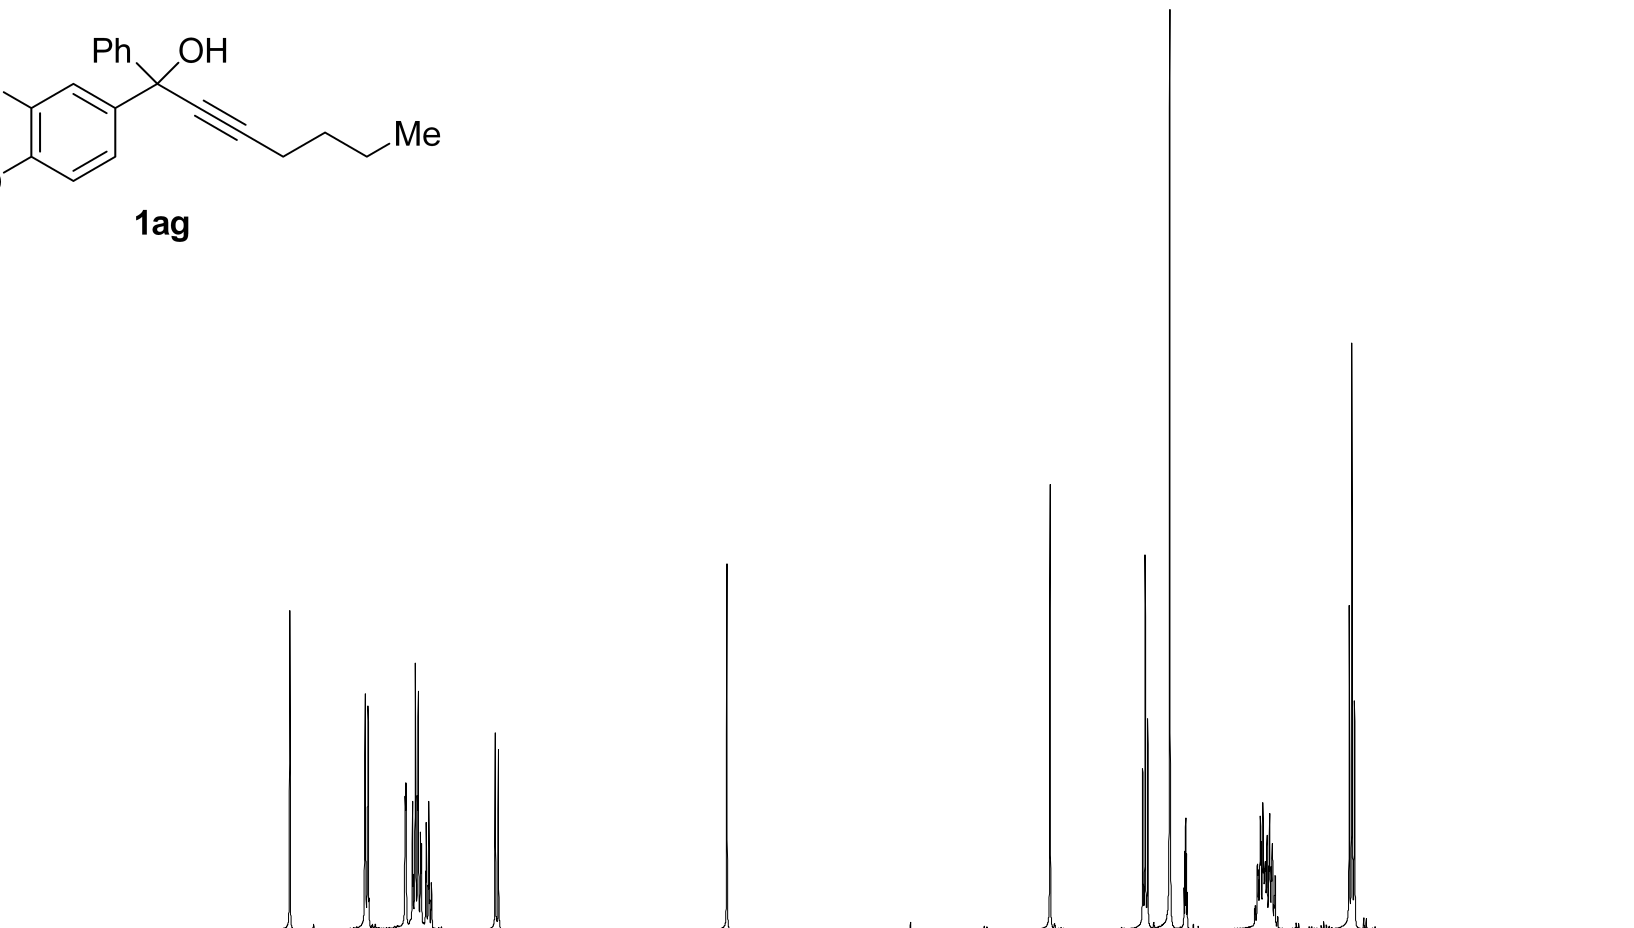

0.93  
1.98  
1.05  
2.98  
0.97  
1.00

0.92

2.00  
3.00  
4.00  
3.01

Current Data Parameters  
NAME qdy-20136 H  
EXPNO 1  
PROCNO 1

F2 - Acquisition Parameters  
Date\_ 20160504  
Time 22.47  
INSTRUM spect  
PROBHD 5 mm PABBO BB/  
PULPROG zg30  
TD 65536  
SOLVENT Acetone  
NS 4  
DS 0  
SWH 8012.820 Hz  
FIDRES 0.122266 Hz  
AQ 4.0894465 sec  
RG 49.32  
DW 62.400 usec  
DE 6.50 usec  
TE 298.0 K  
D1 1.00000000 sec  
TD0 1

==== CHANNEL f1 =====  
SFO1 400.1324710 MHz  
NUC1 1H  
P1 14.50 usec  
PLW1 11.99499989 W

F2 - Processing parameters  
SI 65536  
SF 400.1300068 MHz  
WDW EM  
SSB 0  
LB 0.30 Hz  
GB 0  
PC 1.00

Supplementary Figure 69. <sup>1</sup>H NMR spectrum for 1ag

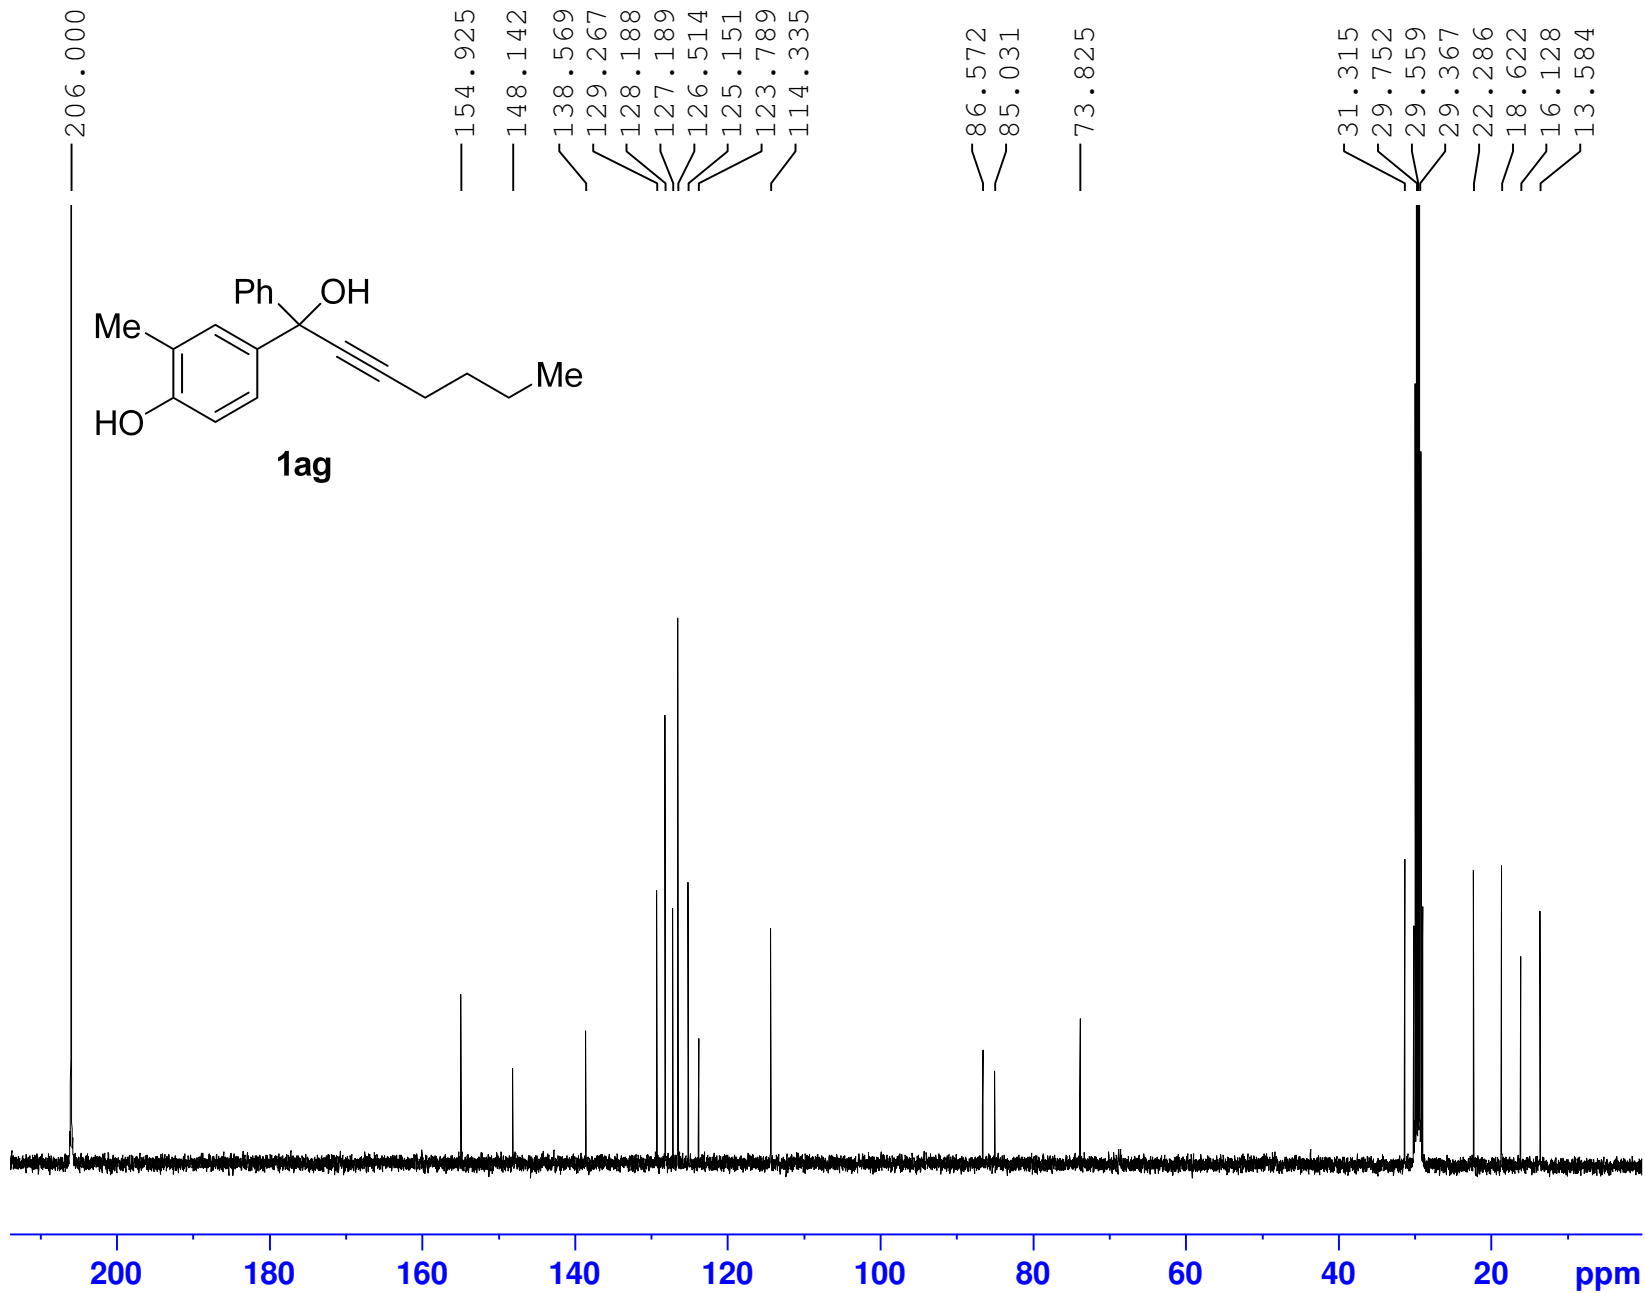

Current Data Parameters  
 NAME qdy-20136 C  
 EXPNO 1  
 PROCNO 1

F2 - Acquisition Parameters  
 Date\_ 20160504  
 Time 22.39  
 INSTRUM spect  
 PROBHD 5 mm PABBO BB/  
 PULPROG zgpg30  
 TD 65536  
 SOLVENT Acetone  
 NS 95  
 DS 0  
 SWH 24038.461 Hz  
 FIDRES 0.366798 Hz  
 AQ 1.3631488 sec  
 RG 196.92  
 DW 20.800 usec  
 DE 6.50 usec  
 TE 298.3 K  
 D1 2.00000000 sec  
 D11 0.03000000 sec  
 TD0 1

==== CHANNEL f1 =====  
 SFO1 100.6228298 MHz  
 NUC1 13C  
 P1 9.70 usec  
 PLW1 46.98899841 W

==== CHANNEL f2 =====  
 SFO2 400.1316005 MHz  
 NUC2 1H  
 CPDPRG[2] waltz16  
 PCPD2 90.00 usec  
 PLW2 11.99499989 W  
 PLW12 0.34213999 W  
 PLW13 0.27713001 W

F2 - Processing parameters  
 SI 32768  
 SF 100.6127103 MHz  
 WDW EM  
 SSB 0  
 LB 1.00 Hz  
 GB 0  
 PC 1.40

Supplementary Figure 70. <sup>13</sup>C NMR spectrum for 1ag

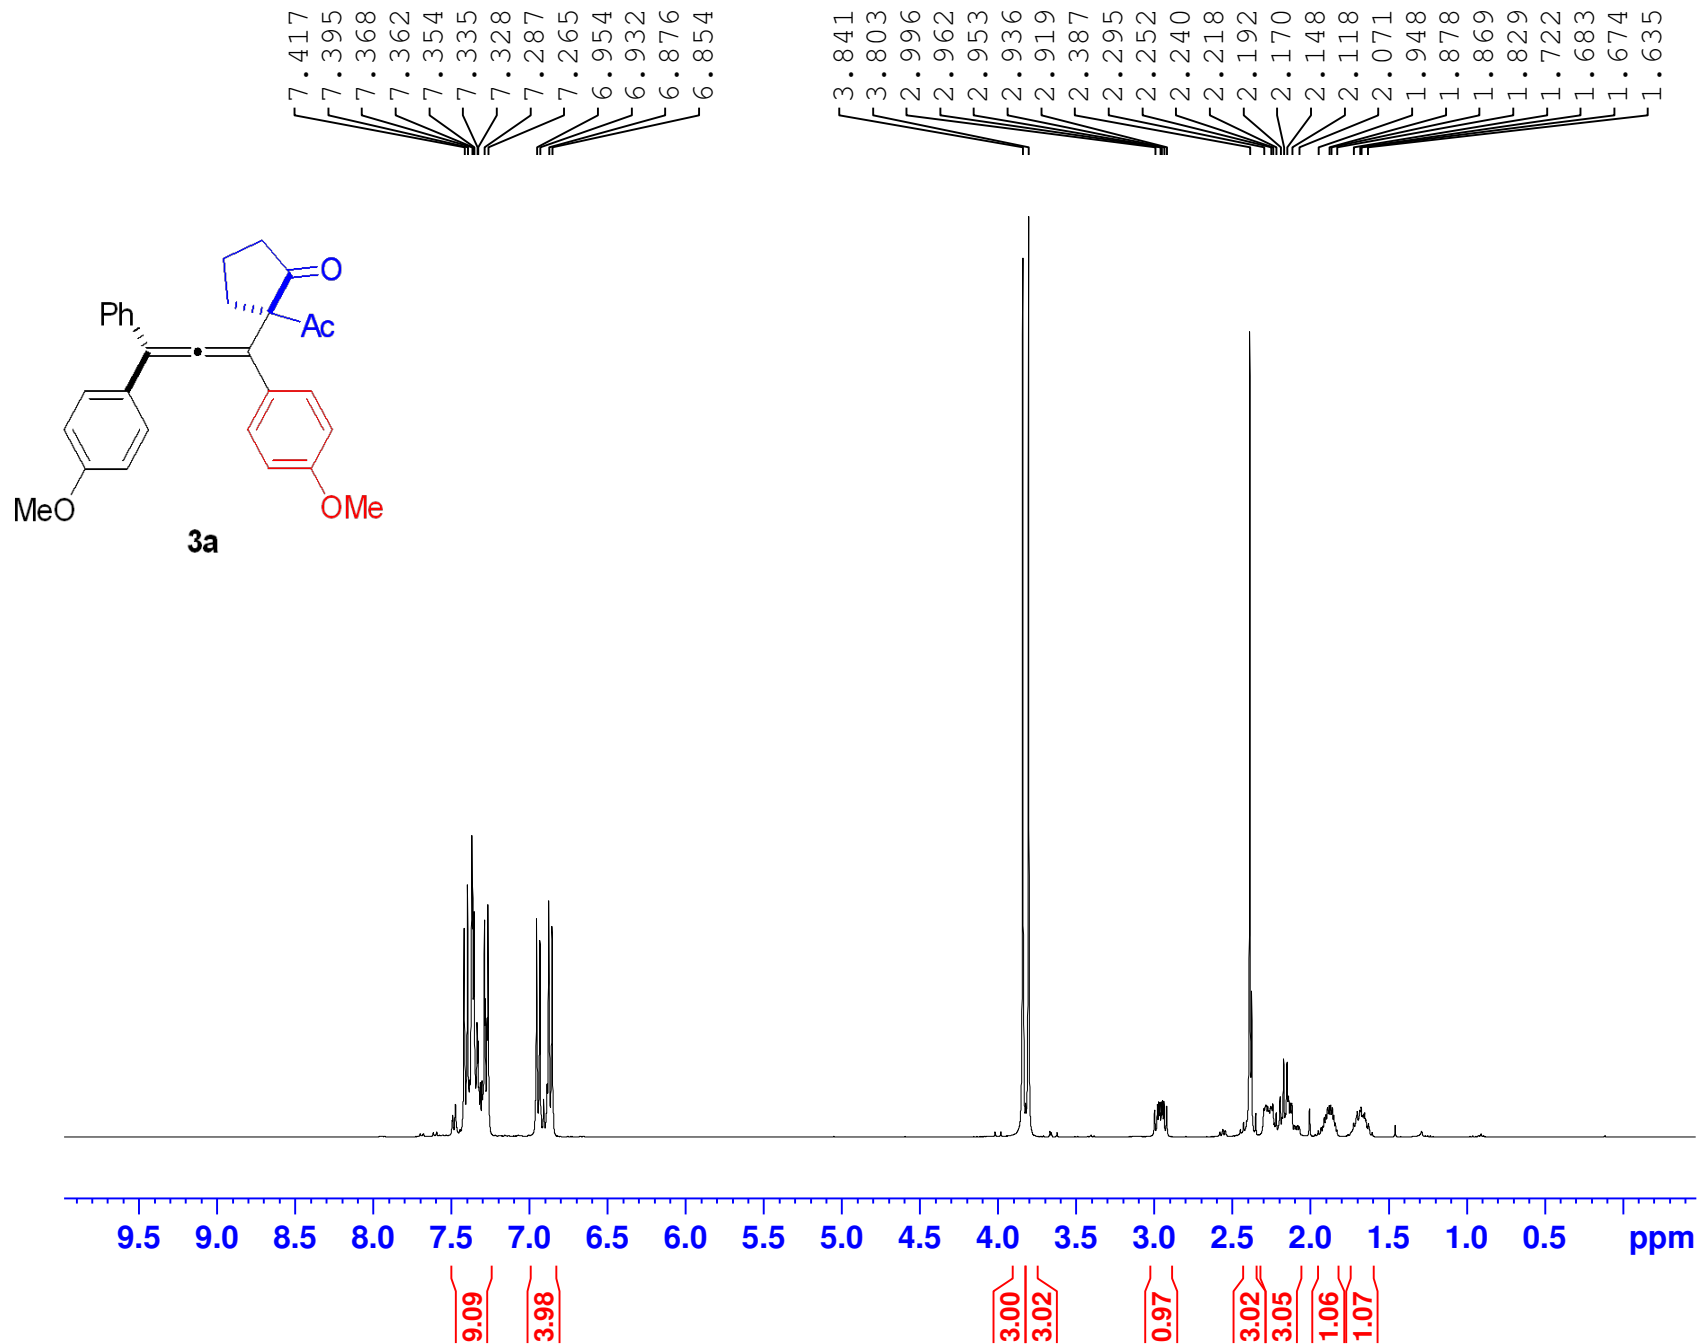

Current Data Parameters  
 NAME qdy-40018-1 H  
 EXPNO 1  
 PROCNO 1

F2 - Acquisition Parameters  
 Date\_ 20161217  
 Time 19.21  
 INSTRUM spect  
 PROBHD 5 mm PABBO BB/  
 PULPROG zg30  
 TD 65536  
 SOLVENT CDC13  
 NS 4  
 DS 0  
 SWH 8012.820 Hz  
 FIDRES 0.122266 Hz  
 AQ 4.0894465 sec  
 RG 39.46  
 DW 62.400 usec  
 DE 6.50 usec  
 TE 296.8 K  
 D1 1.00000000 sec  
 TD0 1

==== CHANNEL f1 =====  
 SFO1 400.1324710 MHz  
 NUC1 1H  
 P1 14.50 usec  
 PLW1 11.99499989 W

F2 - Processing parameters  
 SI 65536  
 SF 400.1300043 MHz  
 WDW EM  
 SSB 0  
 LB 0.30 Hz  
 GB 0  
 PC 1.00

Supplementary Figure 71. <sup>1</sup>H NMR spectrum for **3a**

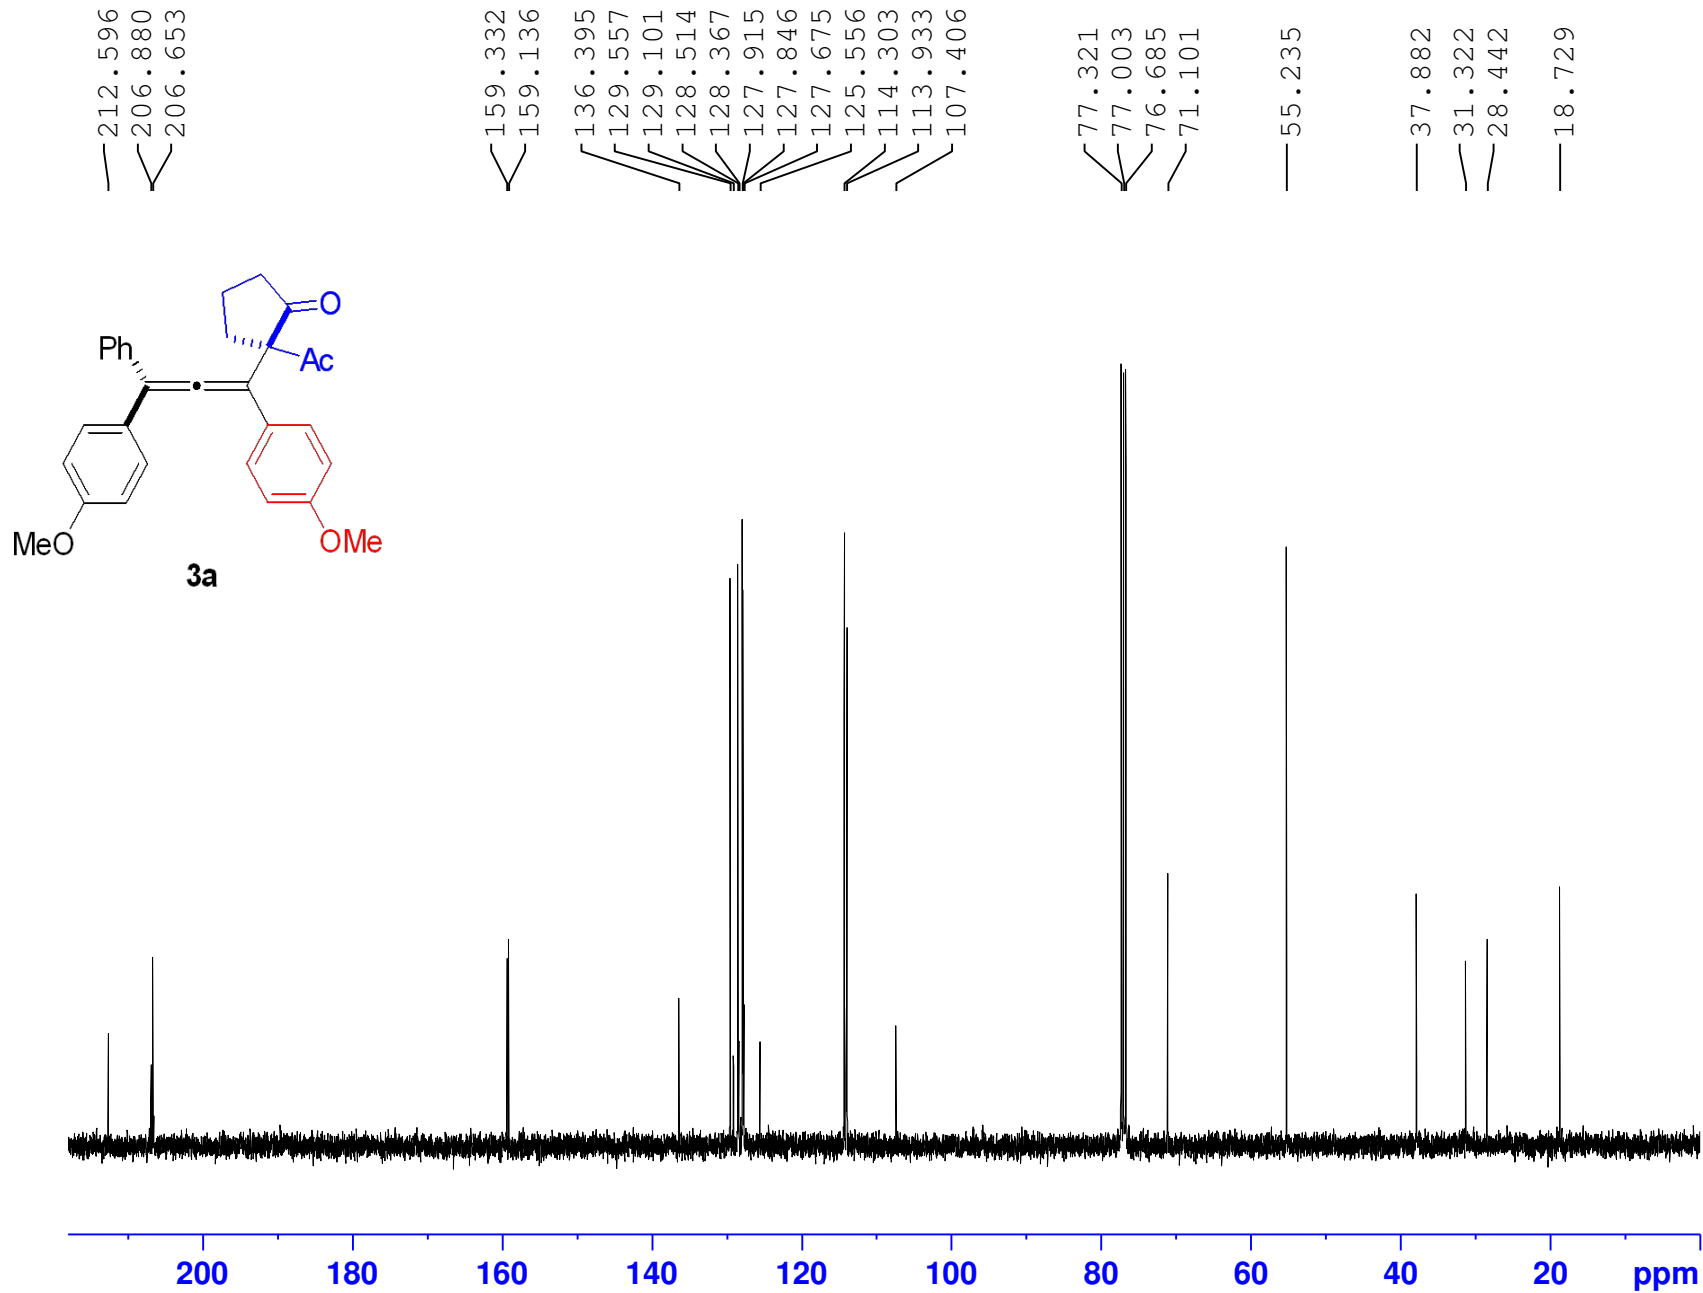

Current Data Parameters  
 NAME qdy-40018-1 C  
 EXPNO 1  
 PROCNO 1

F2 - Acquisition Parameters  
 Date\_ 20161217  
 Time 19.23  
 INSTRUM spect  
 PROBHD 5 mm PABBO BB/  
 PULPROG zgpg30  
 TD 65536  
 SOLVENT CDC13  
 NS 50  
 DS 0  
 SWH 24038.461 Hz  
 FIDRES 0.366798 Hz  
 AQ 1.3631488 sec  
 RG 196.92  
 DW 20.800 usec  
 DE 6.50 usec  
 TE 297.6 K  
 D1 2.00000000 sec  
 D11 0.03000000 sec  
 TD0 1

==== CHANNEL f1 =====  
 SFO1 100.6228298 MHz  
 NUC1 13C  
 P1 9.70 usec  
 PLW1 46.98899841 W

==== CHANNEL f2 =====  
 SFO2 400.1316005 MHz  
 NUC2 1H  
 CPDPRG[2] waltz16  
 PCPD2 90.00 usec  
 PLW2 11.99499989 W  
 PLW12 0.34213999 W  
 PLW13 0.27713001 W

F2 - Processing parameters  
 SI 32768  
 SF 100.6127780 MHz  
 WDW EM  
 SSB 0  
 LB 1.00 Hz  
 GB 0  
 PC 1.40

Supplementary Figure 72. <sup>13</sup>C NMR spectrum for 3a

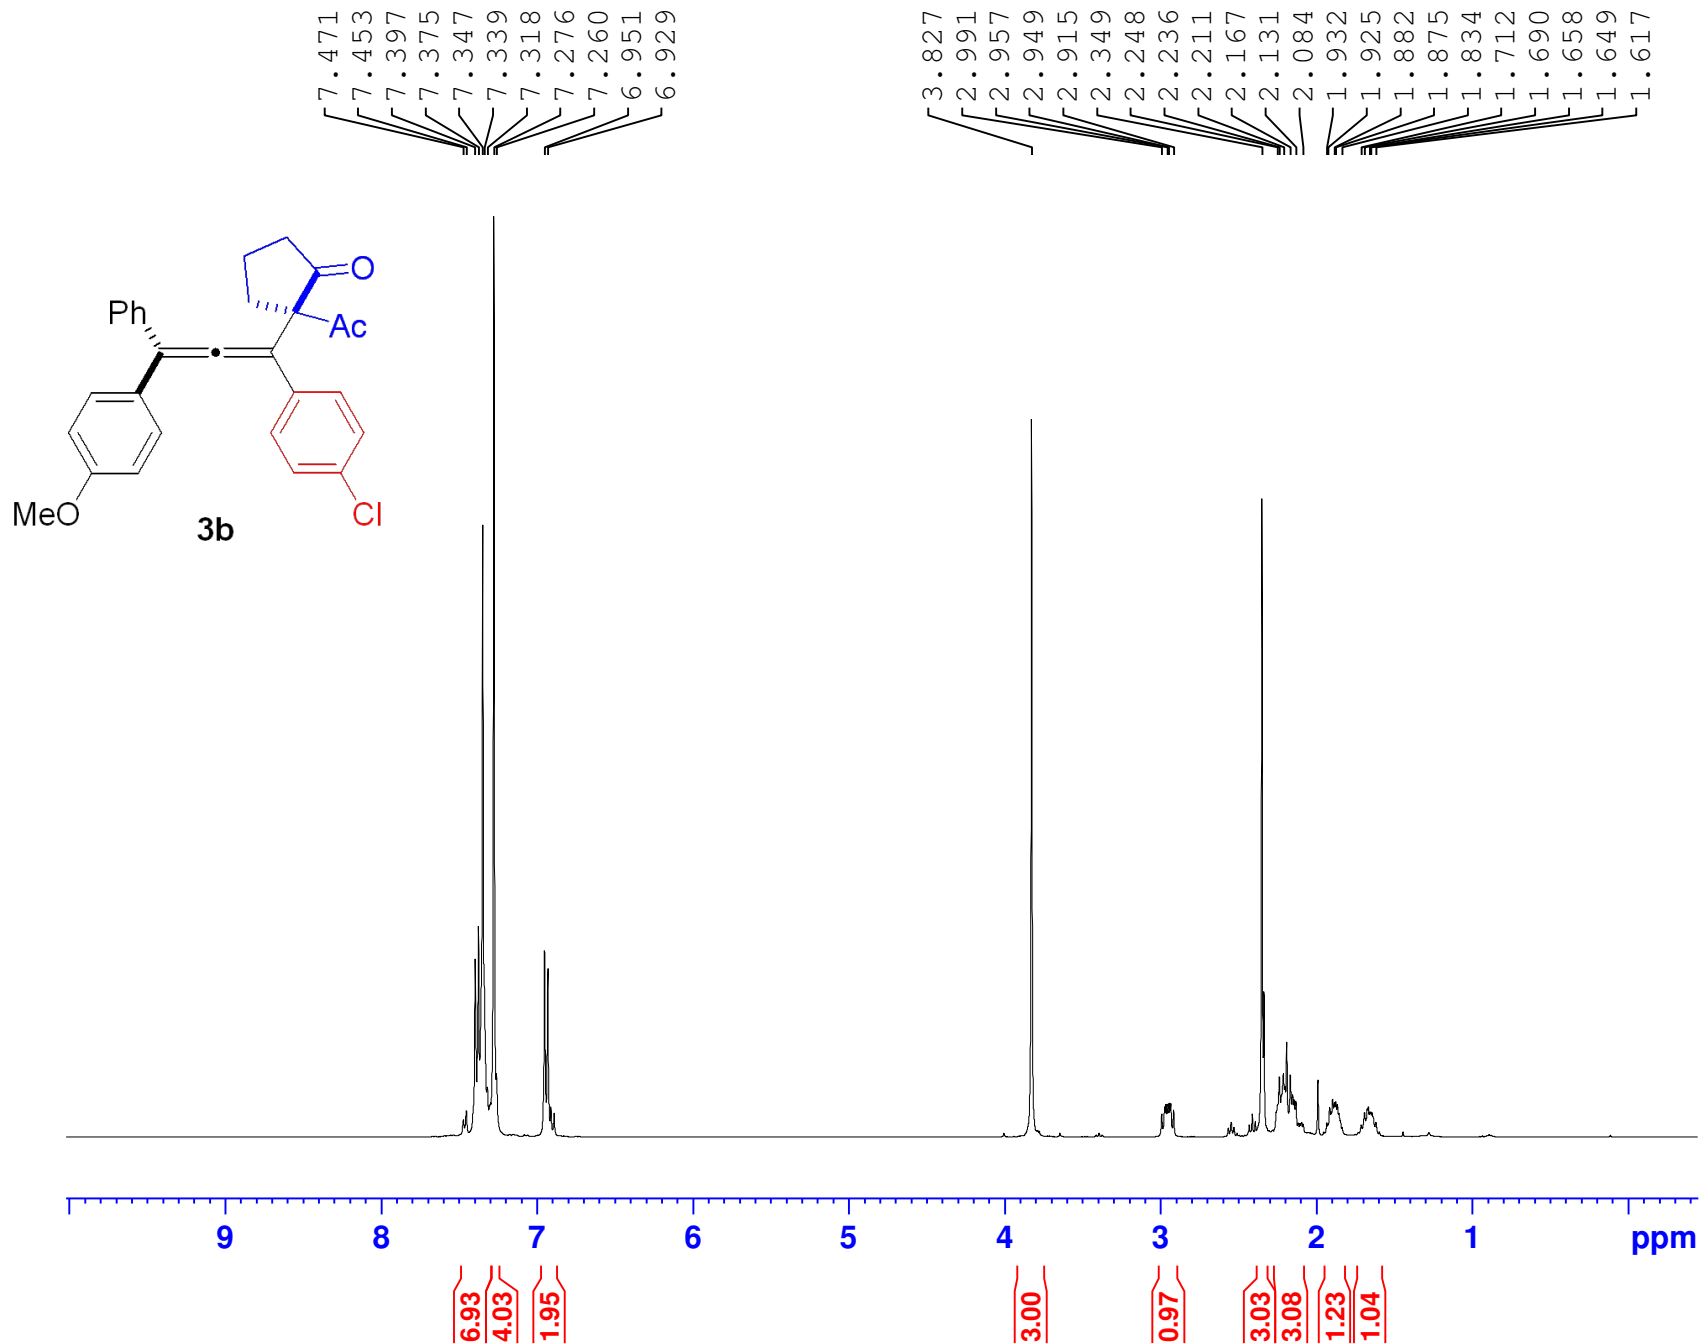

Current Data Parameters  
 NAME qdy-40018-3 H  
 EXPNO 1  
 PROCNO 1

F2 - Acquisition Parameters  
 Date\_ 20161219  
 Time 19.28  
 INSTRUM spect  
 PROBHD 5 mm PABBO BB/  
 PULPROG zg30  
 TD 65536  
 SOLVENT CDC13  
 NS 4  
 DS 0  
 SWH 8012.820 Hz  
 FIDRES 0.122266 Hz  
 AQ 4.0894465 sec  
 RG 34.77  
 DW 62.400 usec  
 DE 6.50 usec  
 TE 295.7 K  
 D1 1.00000000 sec  
 TD0 1

==== CHANNEL f1 =====  
 SFO1 400.1324710 MHz  
 NUC1 1H  
 P1 14.50 usec  
 PLW1 11.99499989 W

F2 - Processing parameters  
 SI 65536  
 SF 400.1300087 MHz  
 WDW EM  
 SSB 0  
 LB 0.30 Hz  
 GB 0  
 PC 1.00

Supplementary Figure 73. <sup>1</sup>H NMR spectrum for 3b

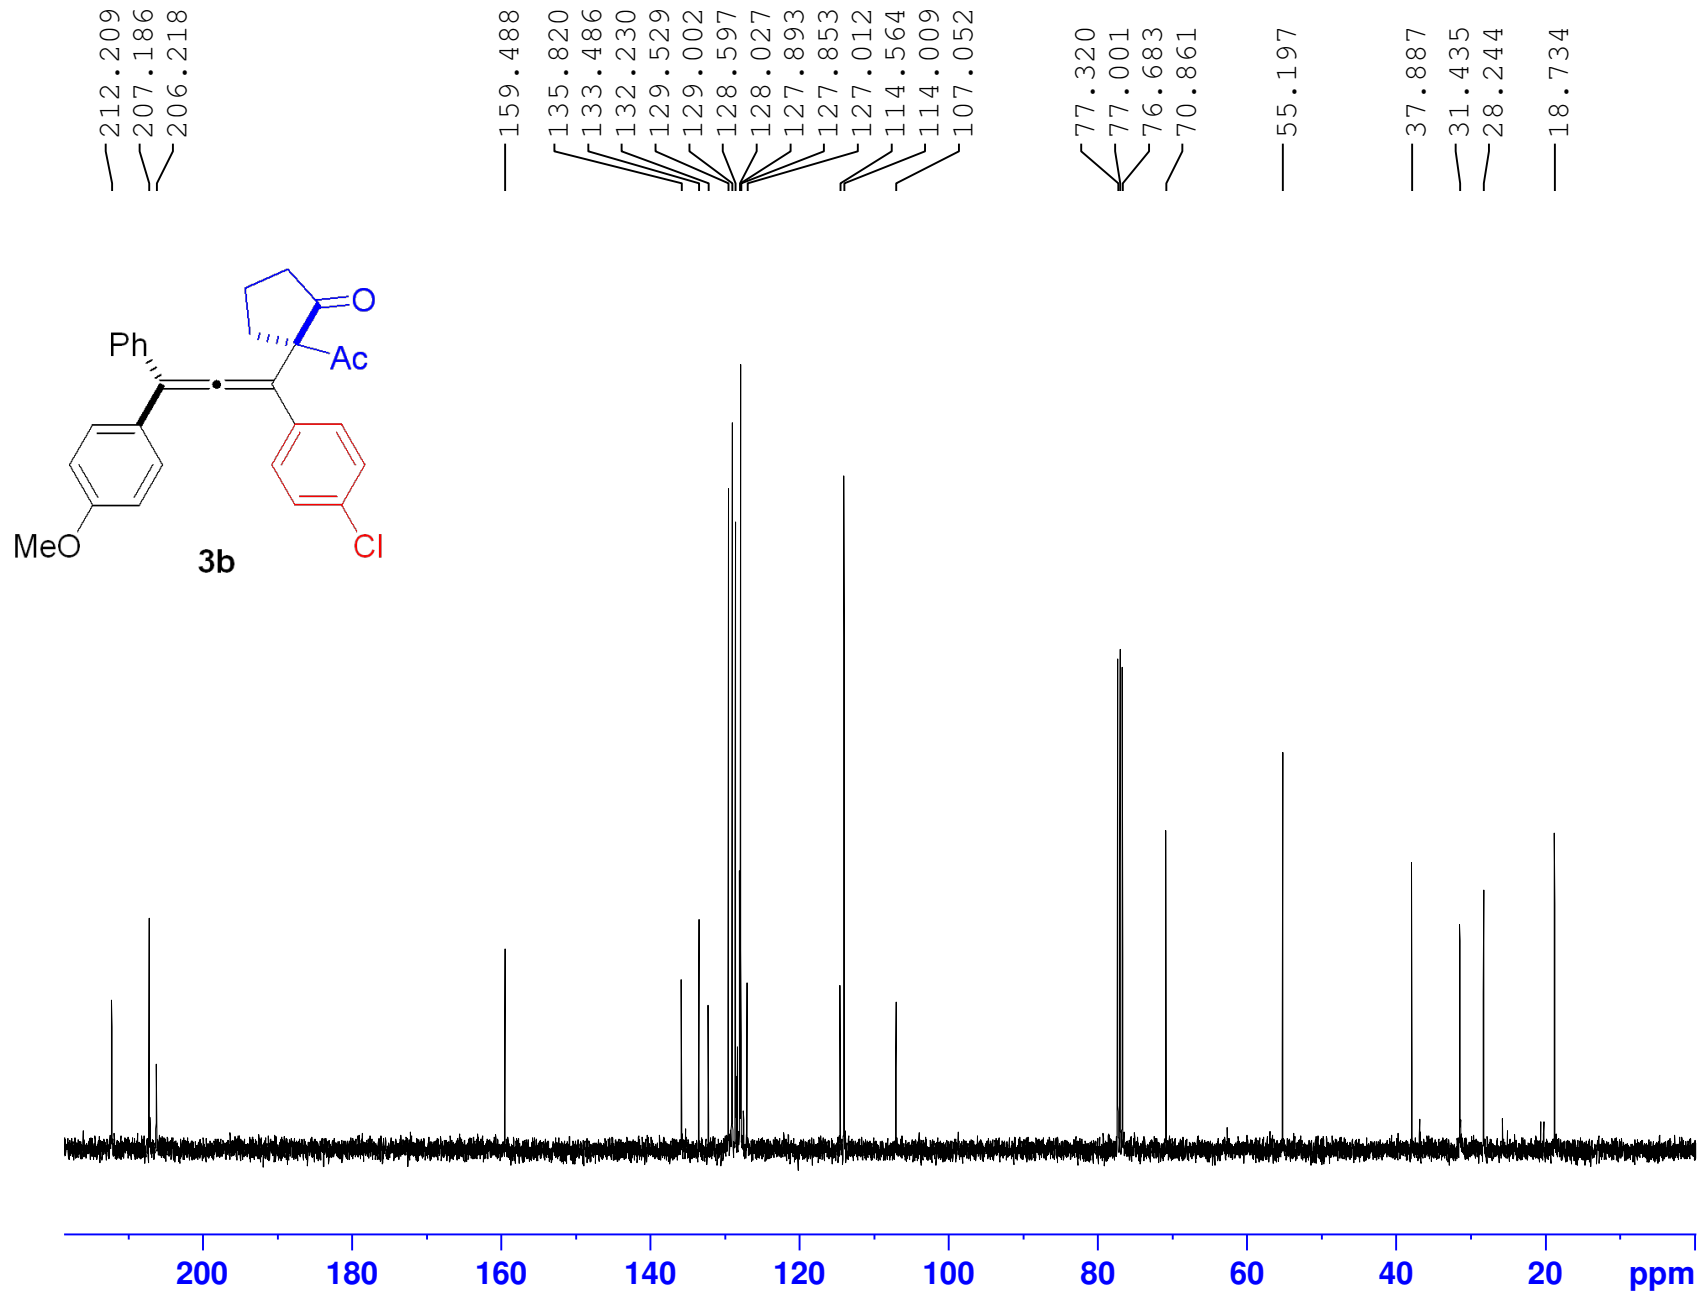

Current Data Parameters  
 NAME qdy-40018-3 C  
 EXPNO 1  
 PROCNO 1

F2 - Acquisition Parameters  
 Date\_ 20161219  
 Time 19.30  
 INSTRUM spect  
 PROBHD 5 mm PABBO BB/  
 PULPROG zgpg30  
 TD 65536  
 SOLVENT CDC13  
 NS 67  
 DS 0  
 SWH 24038.461 Hz  
 FIDRES 0.366798 Hz  
 AQ 1.3631488 sec  
 RG 196.92  
 DW 20.800 usec  
 DE 6.50 usec  
 TE 296.4 K  
 D1 2.00000000 sec  
 D11 0.03000000 sec  
 TD0 1

==== CHANNEL f1 =====  
 SFO1 100.6228298 MHz  
 NUC1 13C  
 P1 9.70 usec  
 PLW1 46.98899841 W

==== CHANNEL f2 =====  
 SFO2 400.1316005 MHz  
 NUC2 1H  
 CPDPRG[2] waltz16  
 PCPD2 90.00 usec  
 PLW2 11.99499989 W  
 PLW12 0.34213999 W  
 PLW13 0.27713001 W

F2 - Processing parameters  
 SI 32768  
 SF 100.6127824 MHz  
 WDW EM  
 SSB 0  
 LB 1.00 Hz  
 GB 0  
 PC 1.40

Supplementary Figure 74. <sup>13</sup>C NMR spectrum for 3b

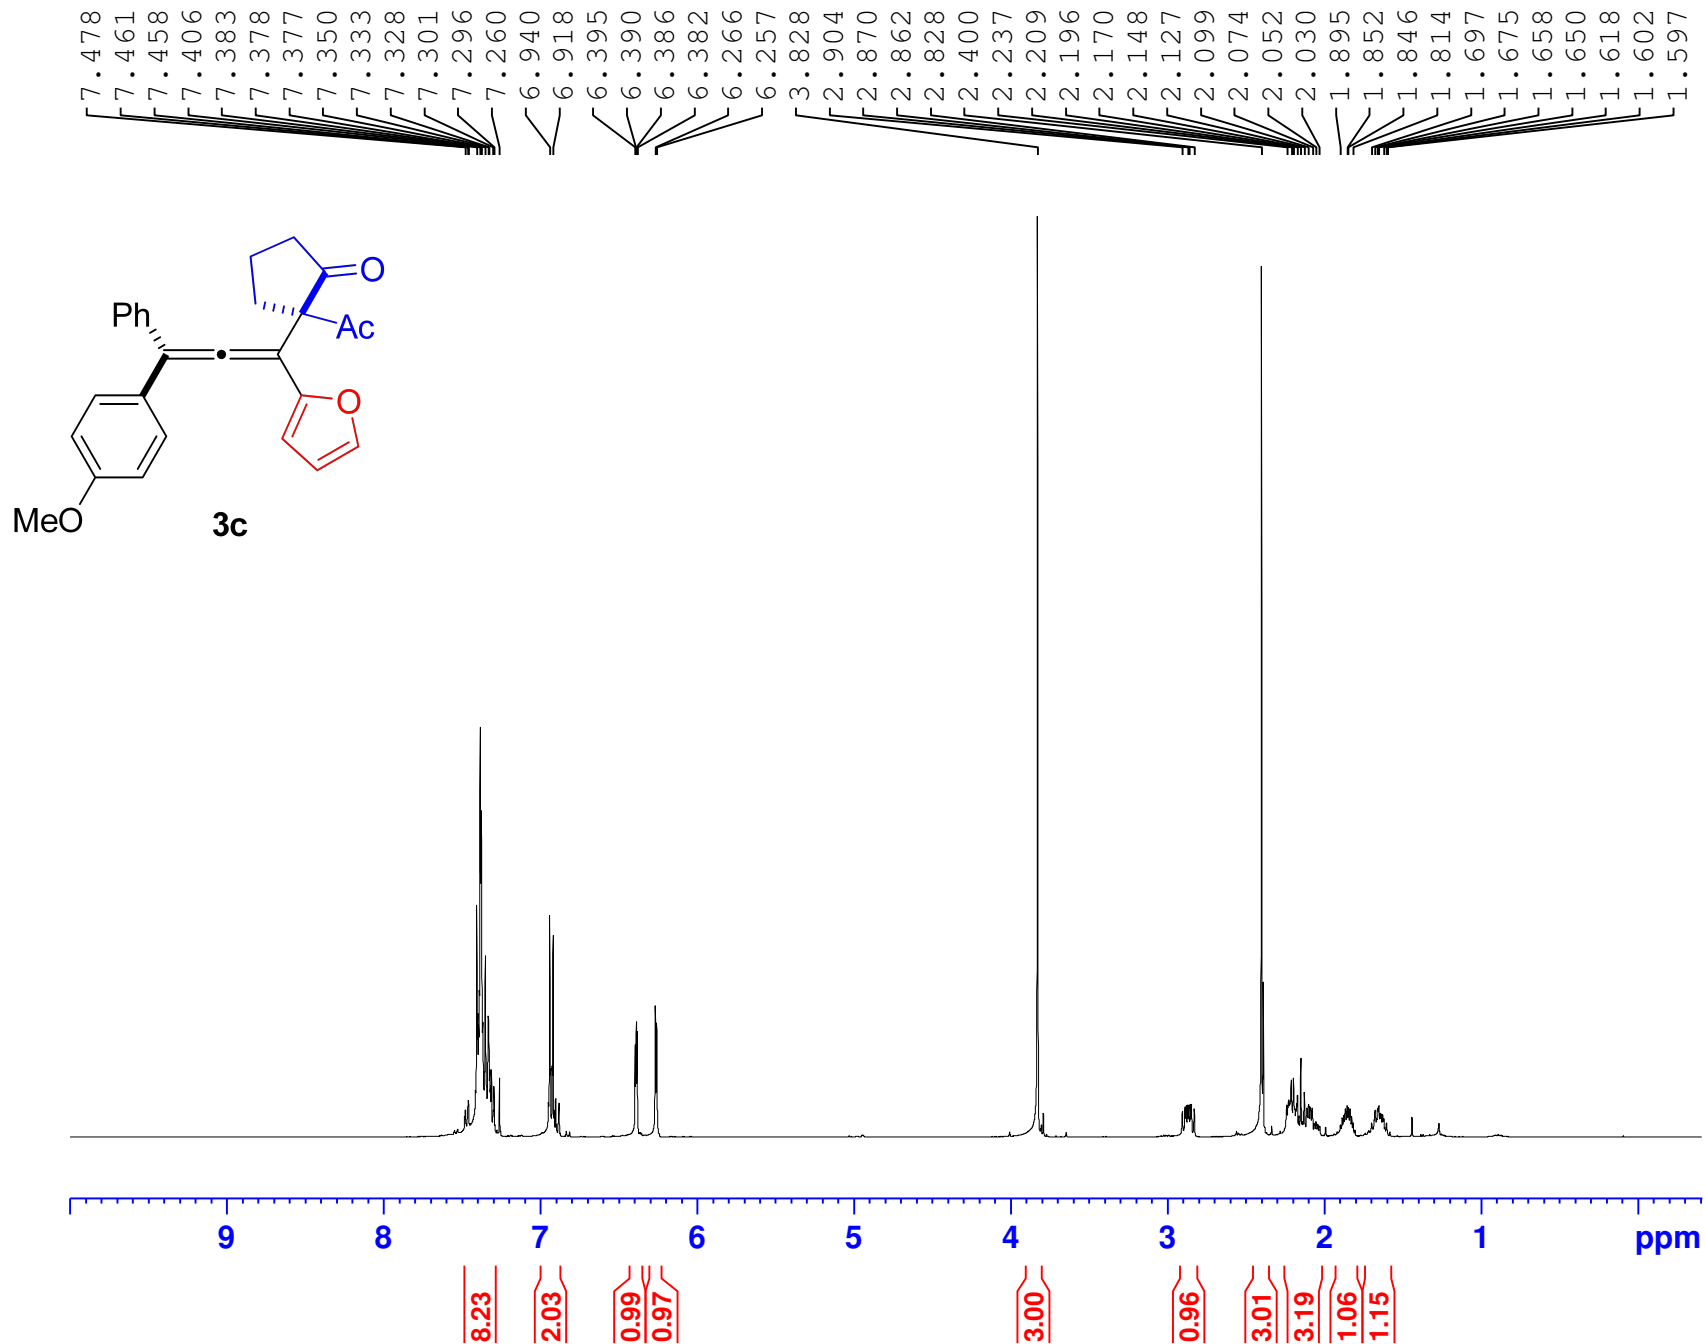

Current Data Parameters  
 NAME qdy-40025 H  
 EXPNO 1  
 PROCNO 1

F2 - Acquisition Parameters  
 Date\_ 20161229  
 Time 15.05  
 INSTRUM spect  
 PROBHD 5 mm DUL 13C-1  
 PULPROG zg30  
 TD 65536  
 SOLVENT CDC13  
 NS 4  
 DS 0  
 SWH 8012.820 Hz  
 FIDRES 0.122266 Hz  
 AQ 4.0894465 sec  
 RG 49.32  
 DW 62.400 usec  
 DE 6.50 usec  
 TE 296.3 K  
 D1 1.00000000 sec  
 TD0 1

==== CHANNEL f1 =====  
 SFO1 400.1324710 MHz  
 NUC1 1H  
 P1 14.30 usec  
 PLW1 9.10000038 W

F2 - Processing parameters  
 SI 65536  
 SF 400.1300090 MHz  
 WDW EM  
 SSB 0  
 LB 0.30 Hz  
 GB 0  
 PC 1.00

Supplementary Figure 75. <sup>1</sup>H NMR spectrum for 3c



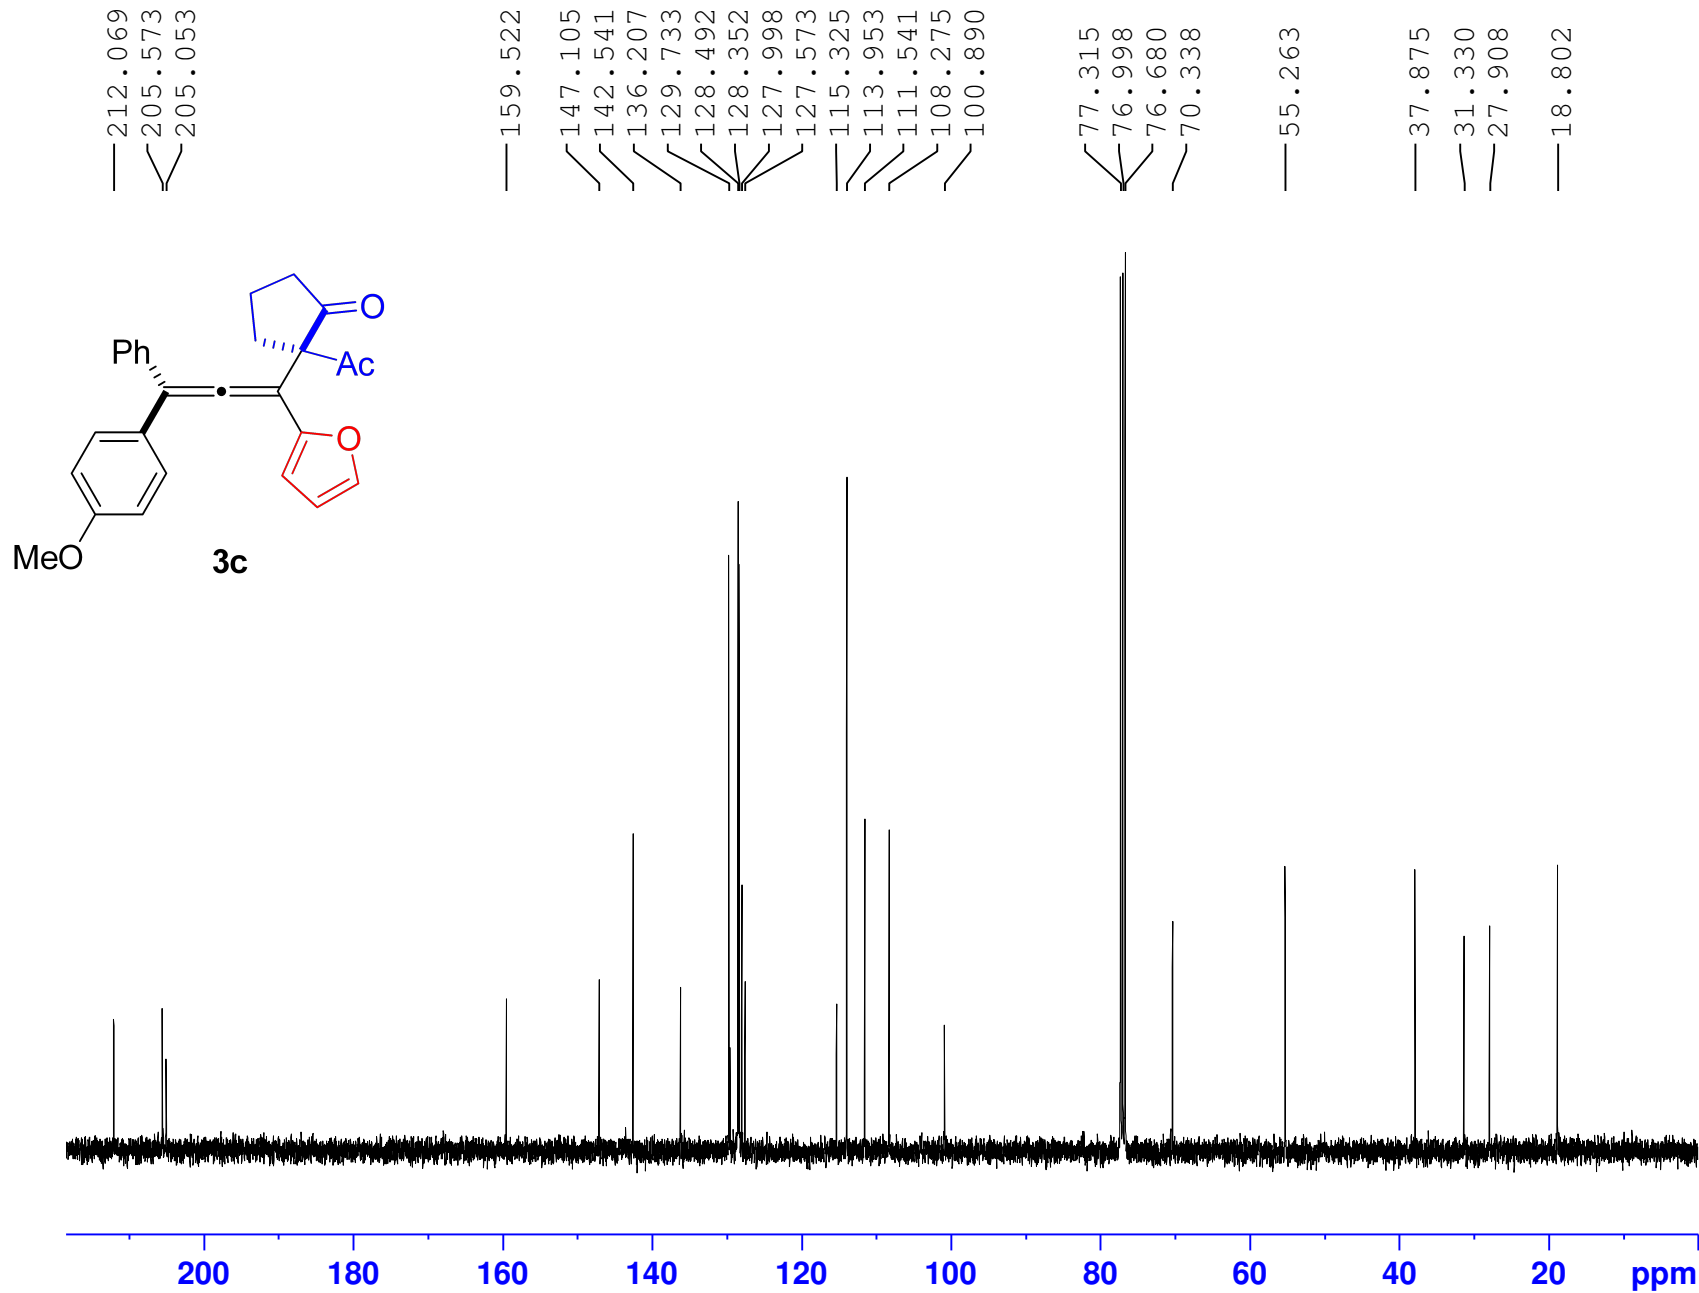

Current Data Parameters  
 NAME qdy-40025-4 C  
 EXPNO 1  
 PROCNO 2

F2 - Acquisition Parameters  
 Date\_ 20161229  
 Time 15.10  
 INSTRUM spect  
 PROBHD 5 mm DUL 13C-1  
 PULPROG zgpg30  
 TD 65536  
 SOLVENT CDC13  
 NS 67  
 DS 0  
 SWH 24038.461 Hz  
 FIDRES 0.366798 Hz  
 AQ 1.3631488 sec  
 RG 196.92  
 DW 20.800 usec  
 DE 6.50 usec  
 TE 296.8 K  
 D1 2.00000000 sec  
 D11 0.03000000 sec  
 TD0 1

==== CHANNEL f1 =====  
 SFO1 100.6228298 MHz  
 NUC1 13C  
 P1 9.60 usec  
 PLW1 31.98900032 W

==== CHANNEL f2 =====  
 SFO2 400.1316005 MHz  
 NUC2 1H  
 CPDPRG[2] waltz16  
 PCPD2 90.00 usec  
 PLW2 9.10000038 W  
 PLW12 0.24608000 W  
 PLW13 0.19933000 W

F2 - Processing parameters  
 SI 32768  
 SF 100.6127765 MHz  
 WDW EM  
 SSB 0  
 LB 1.00 Hz  
 GB 0  
 PC 1.40

Supplementary Figure 76. <sup>13</sup>C NMR spectrum for 3c

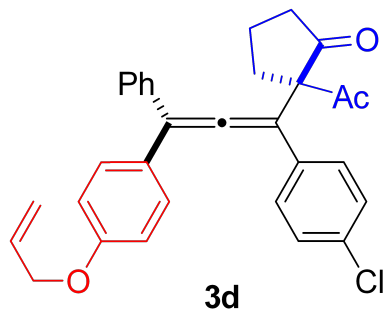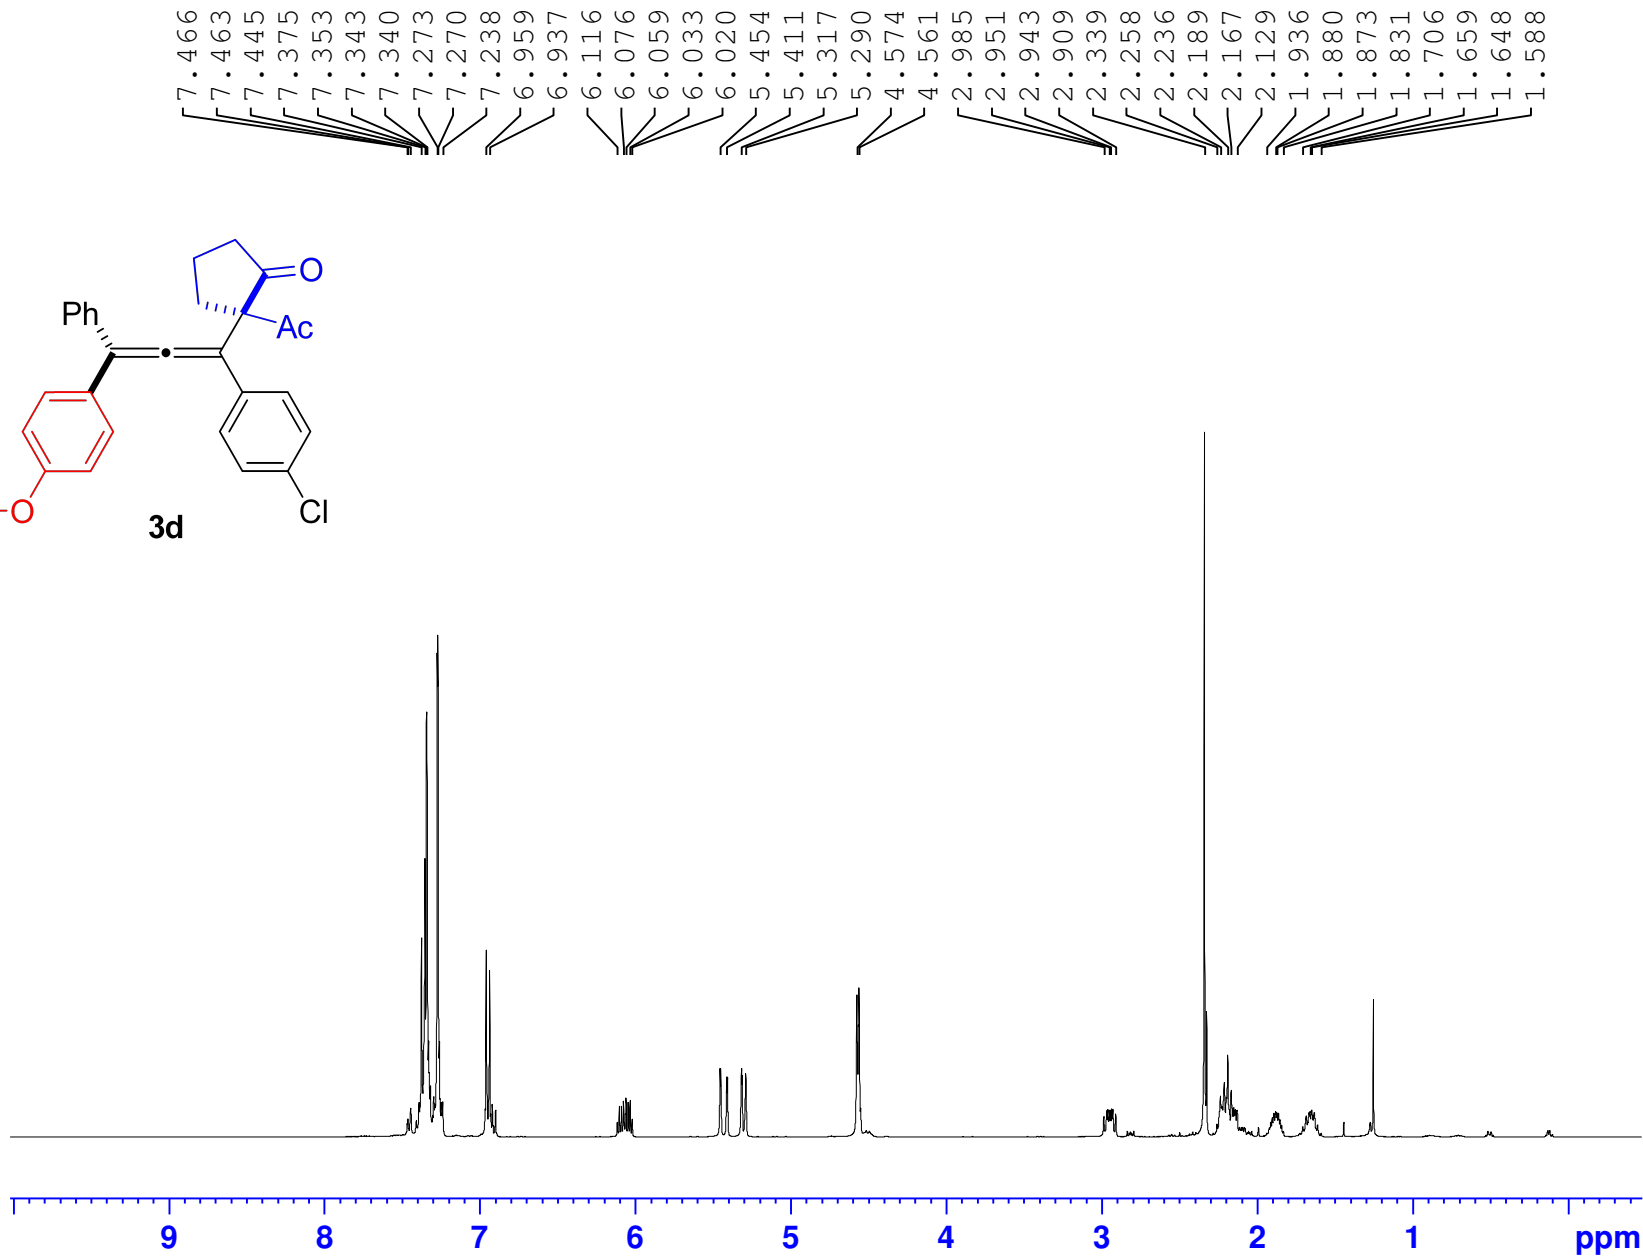

Current Data Parameters  
 NAME qdy-40022-3 H  
 EXPNO 1  
 PROCNO 1

F2 - Acquisition Parameters  
 Date\_ 20161224  
 Time 21.48  
 INSTRUM spect  
 PROBHD 5 mm PABBO BB/  
 PULPROG zg30  
 TD 65536  
 SOLVENT CDC13  
 NS 4  
 DS 0  
 SWH 8012.820 Hz  
 FIDRES 0.122266 Hz  
 AQ 4.0894465 sec  
 RG 45.67  
 DW 62.400 usec  
 DE 6.50 usec  
 TE 297.7 K  
 D1 1.00000000 sec  
 TD0 1

==== CHANNEL f1 =====  
 SFO1 400.1324710 MHz  
 NUC1 1H  
 P1 14.50 usec  
 PLW1 11.99499989 W

F2 - Processing parameters  
 SI 65536  
 SF 400.1300091 MHz  
 WDW EM  
 SSB 0  
 LB 0.30 Hz  
 GB 0  
 PC 1.00

**Supplementary Figure 77. <sup>1</sup>H NMR spectrum for 3d**

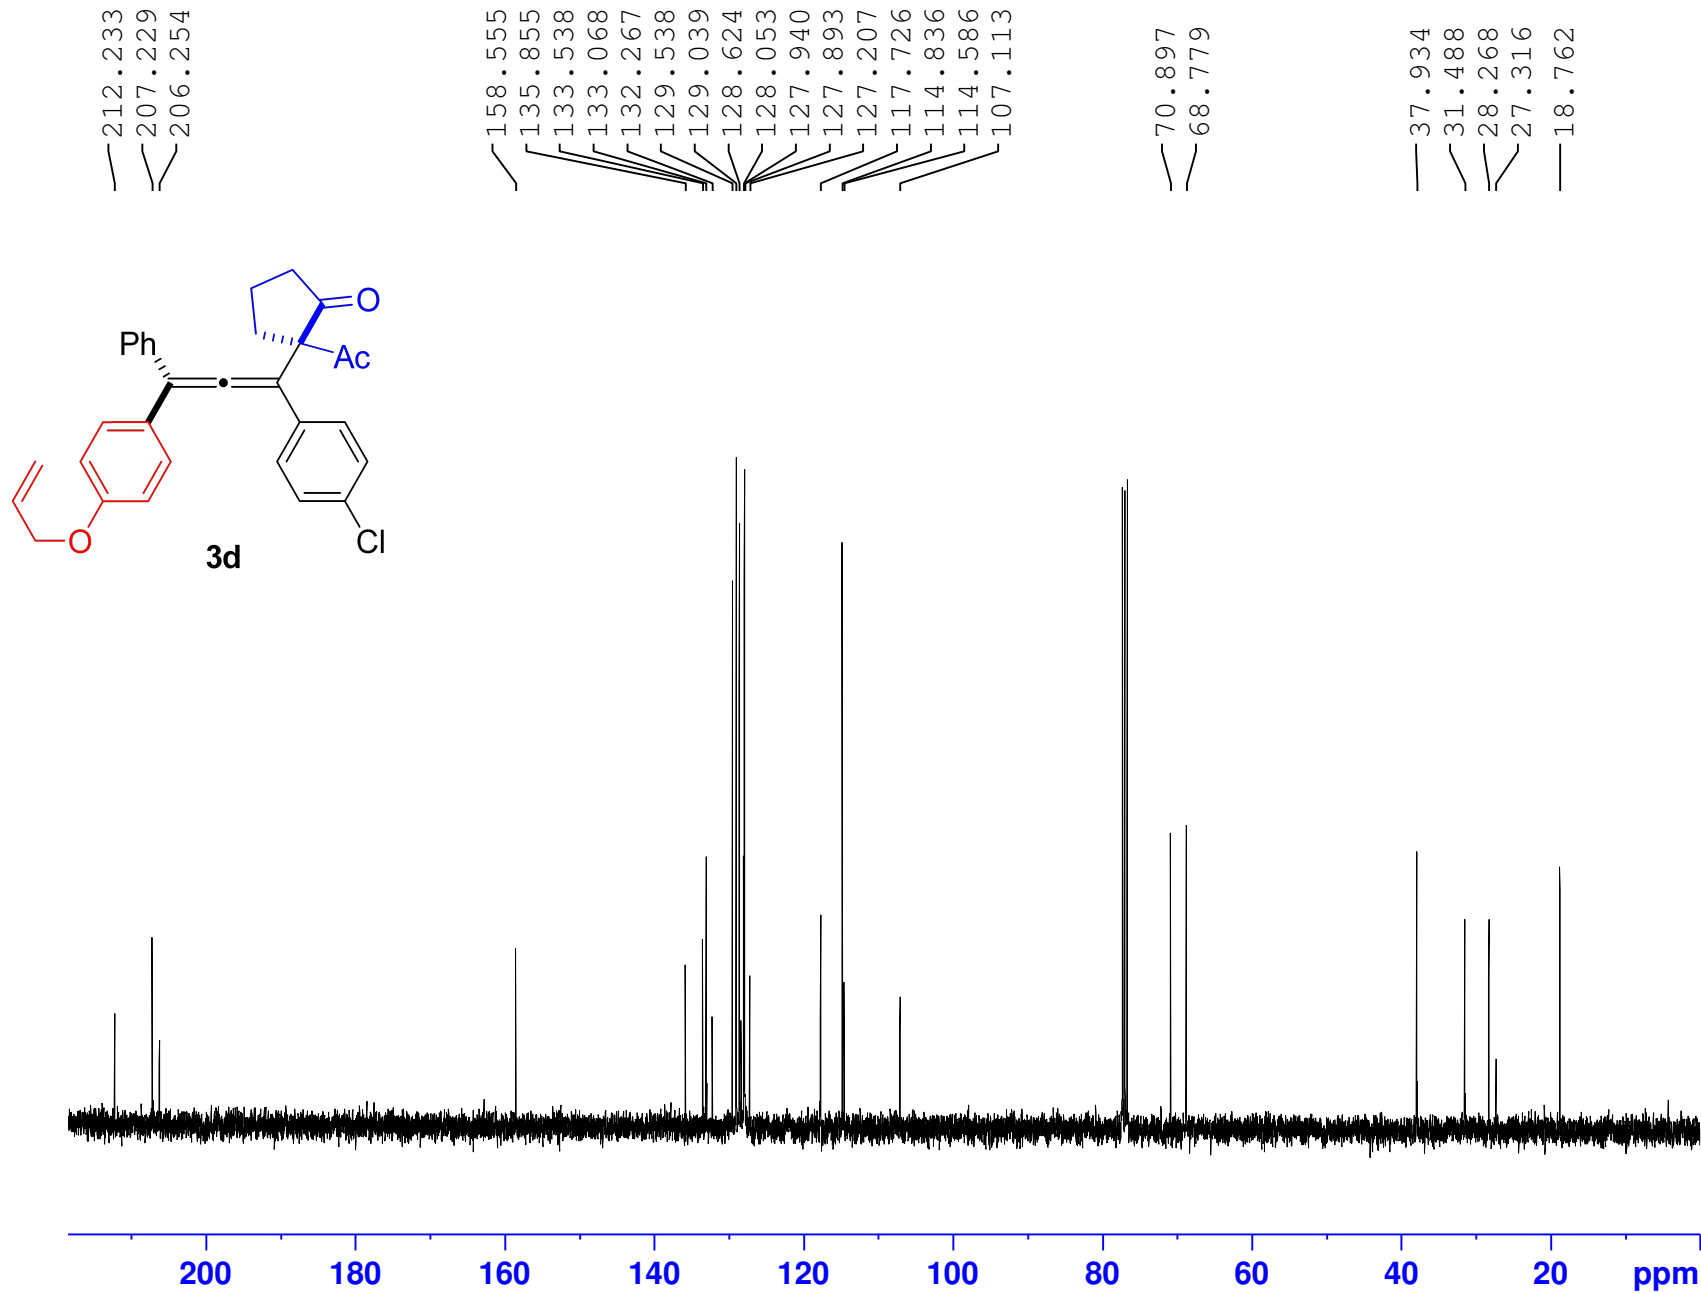

Current Data Parameters  
 NAME qdy-40022-3 C  
 EXPNO 1  
 PROCNO 1

F2 - Acquisition Parameters  
 Date\_ 20161224  
 Time 21.51  
 INSTRUM spect  
 PROBHD 5 mm PABBO BB/  
 PULPROG zgpg30  
 TD 65536  
 SOLVENT CDC13  
 NS 51  
 DS 0  
 SWH 24038.461 Hz  
 FIDRES 0.366798 Hz  
 AQ 1.3631488 sec  
 RG 196.92  
 DW 20.800 usec  
 DE 6.50 usec  
 TE 298.4 K  
 D1 2.00000000 sec  
 D11 0.03000000 sec  
 TD0 1

==== CHANNEL f1 =====  
 SFO1 100.6228298 MHz  
 NUC1 13C  
 P1 9.70 usec  
 PLW1 46.98899841 W

==== CHANNEL f2 =====  
 SFO2 400.1316005 MHz  
 NUC2 1H  
 CPDPRG[2] waltz16  
 PCPD2 90.00 usec  
 PLW2 11.99499989 W  
 PLW12 0.34213999 W  
 PLW13 0.27713001 W

F2 - Processing parameters  
 SI 32768  
 SF 100.6127780 MHz  
 WDW EM  
 SSB 0  
 LB 1.00 Hz  
 GB 0  
 PC 1.40

Supplementary Figure 78. <sup>13</sup>C NMR spectrum for 3d

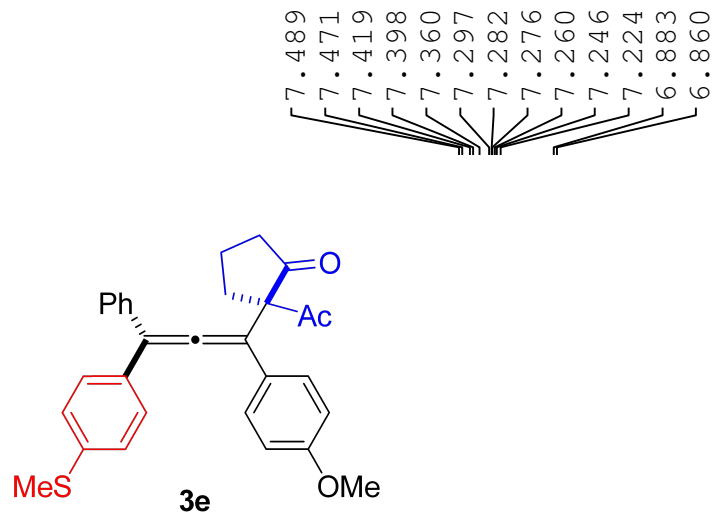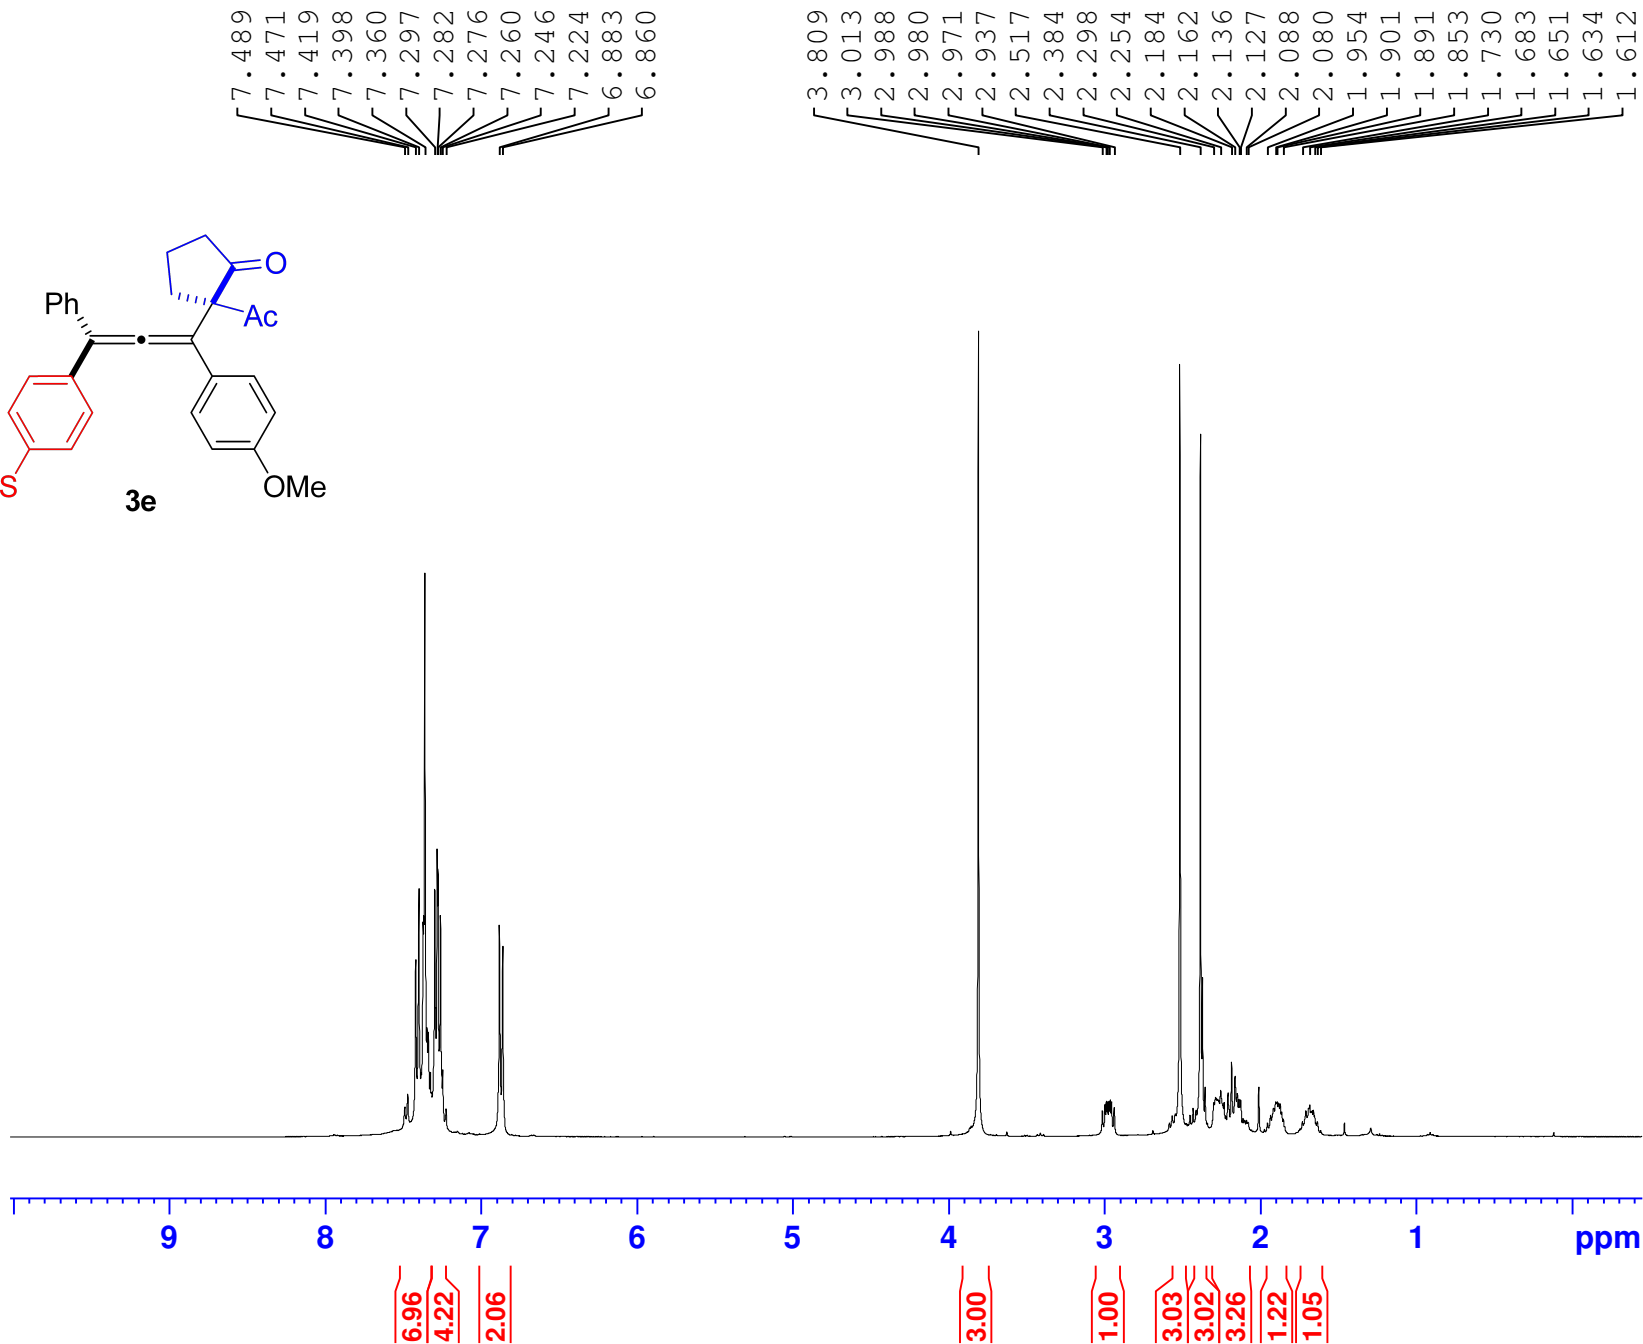

Current Data Parameters  
 NAME qdy-40018-2 H  
 EXPNO 1  
 PROCNO 1

F2 - Acquisition Parameters  
 Date\_ 20161217  
 Time 19.28  
 INSTRUM spect  
 PROBHD 5 mm PABBO BB/  
 PULPROG zg30  
 TD 65536  
 SOLVENT CDC13  
 NS 4  
 DS 0  
 SWH 8012.820 Hz  
 FIDRES 0.122266 Hz  
 AQ 4.0894465 sec  
 RG 34.77  
 DW 62.400 usec  
 DE 6.50 usec  
 TE 296.8 K  
 D1 1.00000000 sec  
 TD0 1

==== CHANNEL f1 =====  
 SFO1 400.1324710 MHz  
 NUC1 1H  
 P1 14.50 usec  
 PLW1 11.99499989 W

F2 - Processing parameters  
 SI 65536  
 SF 400.1300012 MHz  
 WDW EM  
 SSB 0  
 LB 0.30 Hz  
 GB 0  
 PC 1.00

Supplementary Figure 79. <sup>1</sup>H NMR spectrum for **3e**

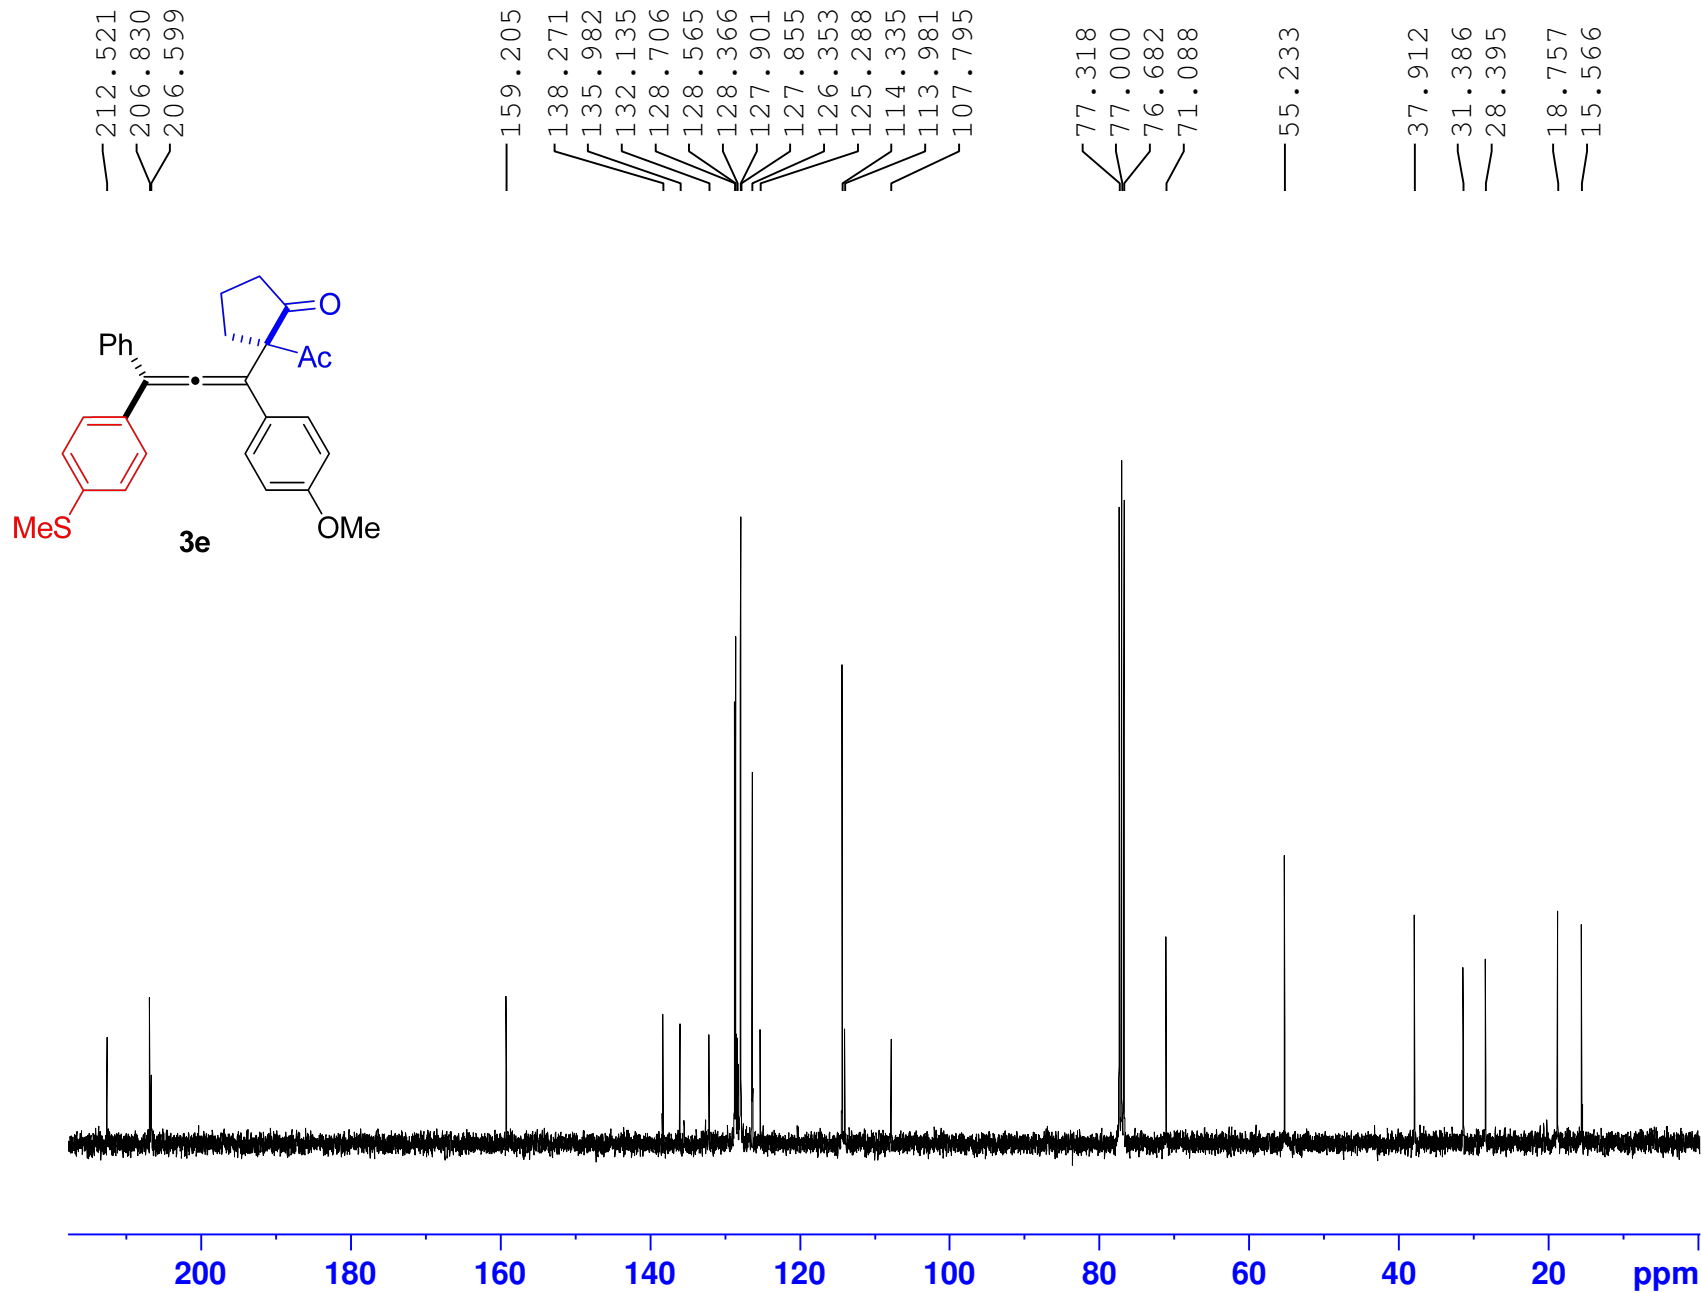

Current Data Parameters  
 NAME qdy-40018-2 C  
 EXPNO 1  
 PROCNO 1

F2 - Acquisition Parameters  
 Date\_ 20161217  
 Time 19.31  
 INSTRUM spect  
 PROBHD 5 mm PABBO BB/  
 PULPROG zgpg30  
 TD 65536  
 SOLVENT CDC13  
 NS 76  
 DS 0  
 SWH 24038.461 Hz  
 FIDRES 0.366798 Hz  
 AQ 1.3631488 sec  
 RG 196.92  
 DW 20.800 usec  
 DE 6.50 usec  
 TE 297.7 K  
 D1 2.00000000 sec  
 D11 0.03000000 sec  
 TD0 1

==== CHANNEL f1 =====  
 SFO1 100.6228298 MHz  
 NUC1 13C  
 P1 9.70 usec  
 PLW1 46.98899841 W

==== CHANNEL f2 =====  
 SFO2 400.1316005 MHz  
 NUC2 1H  
 CPDPRG[2] waltz16  
 PCPD2 90.00 usec  
 PLW2 11.99499989 W  
 PLW12 0.34213999 W  
 PLW13 0.27713001 W

F2 - Processing parameters  
 SI 32768  
 SF 100.6127795 MHz  
 WDW EM  
 SSB 0  
 LB 1.00 Hz  
 GB 0  
 PC 1.40

**Supplementary Figure 80. <sup>13</sup>C NMR spectrum for 3e**

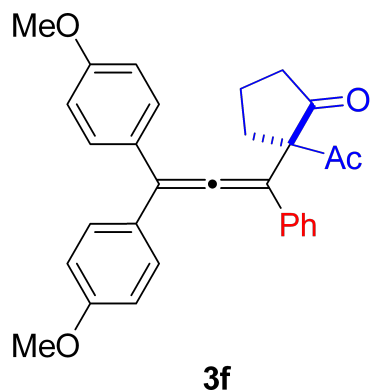

7.414  
7.392  
7.343  
7.326  
7.309  
7.301  
7.279  
7.260  
7.241  
7.221  
6.943  
6.921  
6.898  
6.876

3.829  
3.824  
3.005  
2.971  
2.961  
2.928  
2.372  
2.290  
2.284  
2.270  
2.191  
2.169  
2.147  
2.133  
2.123  
2.086  
2.076  
1.923  
1.905  
1.874  
1.844  
1.835  
1.729  
1.689  
1.680  
1.674

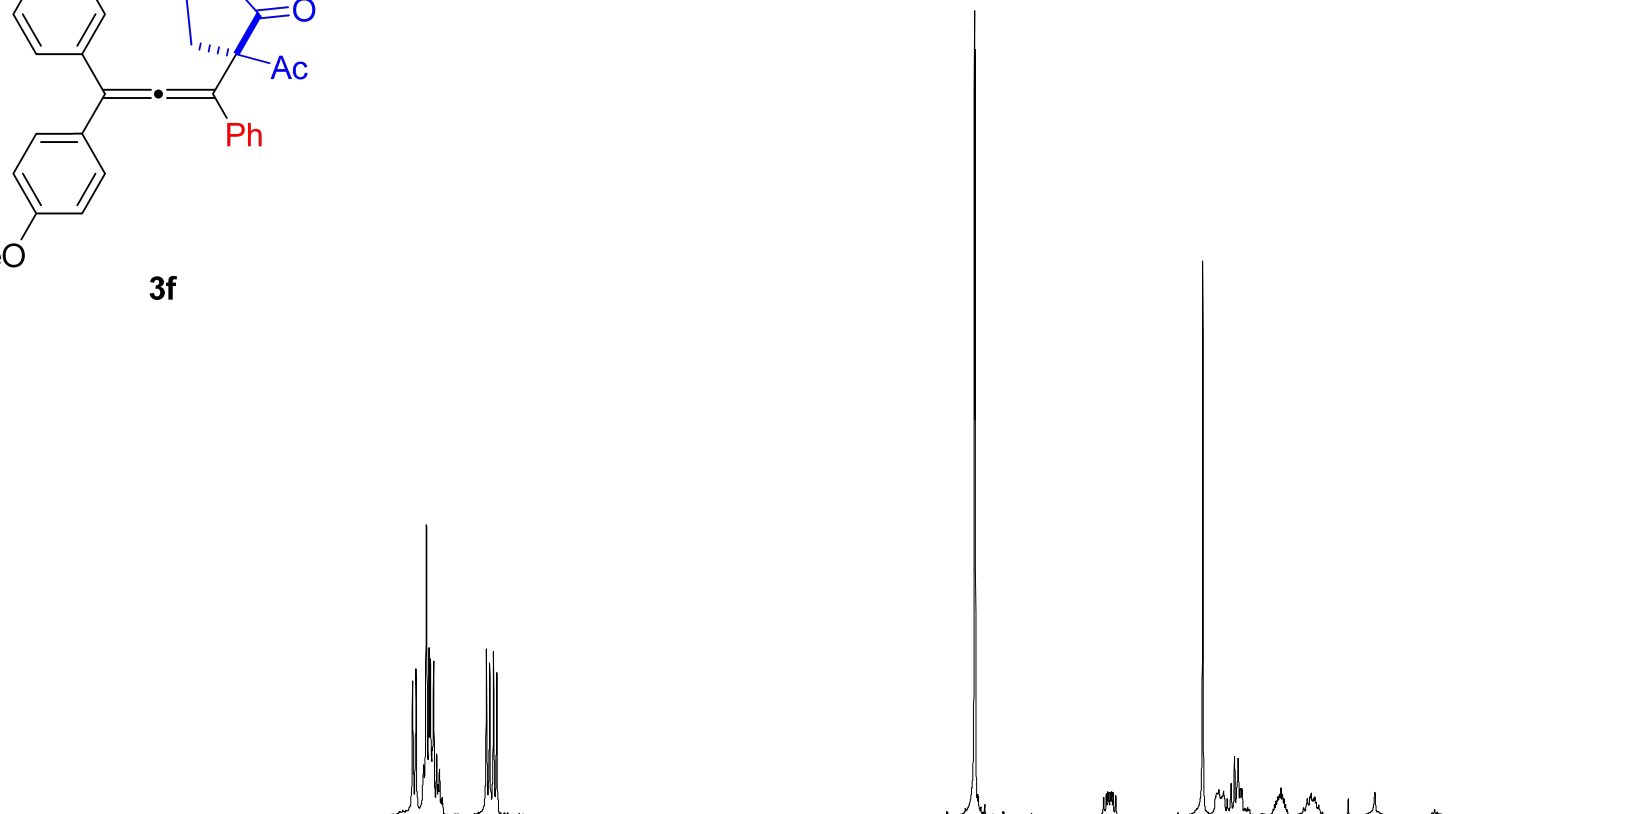

Current Data Parameters  
NAME qdy-30187 H  
EXPNO 2  
PROCNO 1

F2 - Acquisition Parameters  
Date\_ 20161219  
Time 19.46  
INSTRUM spect  
PROBHD 5 mm PABBO BB/  
PULPROG zg30  
TD 65536  
SOLVENT CDC13  
NS 4  
DS 0  
SWH 8012.820 Hz  
FIDRES 0.122266 Hz  
AQ 4.0894465 sec  
RG 49.32  
DW 62.400 usec  
DE 6.50 usec  
TE 295.9 K  
D1 1.00000000 sec  
TD0 1

==== CHANNEL f1 =====  
SFO1 400.1324710 MHz  
NUC1 1H  
P1 14.50 usec  
PLW1 11.99499989 W

F2 - Processing parameters  
SI 65536  
SF 400.1300088 MHz  
WDW EM  
SSB 0  
LB 0.30 Hz  
GB 0  
PC 1.00

9.5 9.0 8.5 8.0 7.5 7.0 6.5 6.0 5.5 5.0 4.5 4.0 3.5 3.0 2.5 2.0 1.5 1.0 0.5 ppm

2.04  
7.08  
4.01

3.32  
2.76

0.97

3.00  
3.11  
1.06  
1.11

Supplementary Figure 81. <sup>1</sup>H NMR spectrum for 3f

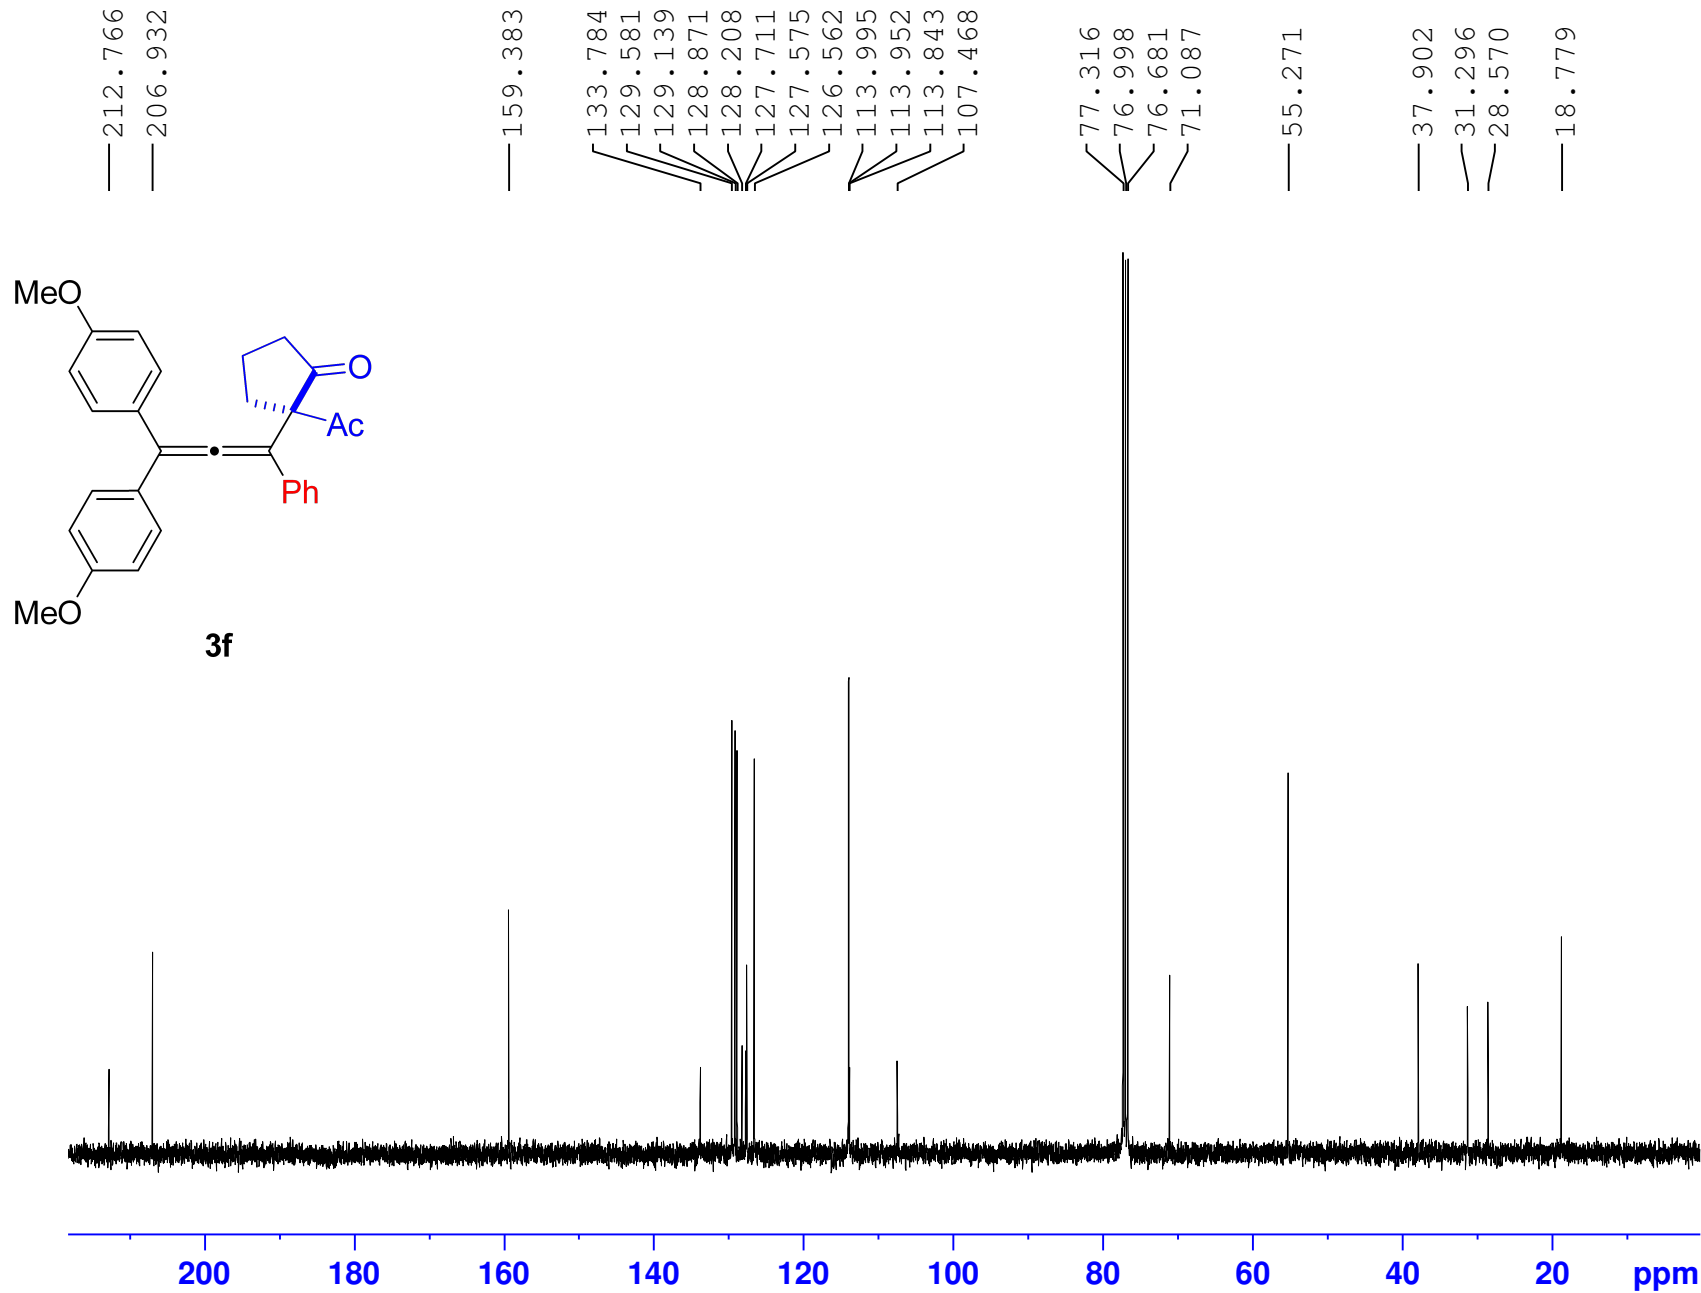

Current Data Parameters  
 NAME qdy-30187 C  
 EXPNO 1  
 PROCNO 1

F2 - Acquisition Parameters  
 Date\_ 20161207  
 Time 19.32  
 INSTRUM spect  
 PROBHD 5 mm PABBO BB/  
 PULPROG zgpg30  
 TD 65536  
 SOLVENT CDC13  
 NS 99  
 DS 0  
 SWH 24038.461 Hz  
 FIDRES 0.366798 Hz  
 AQ 1.3631488 sec  
 RG 196.92  
 DW 20.800 usec  
 DE 6.50 usec  
 TE 296.4 K  
 D1 2.00000000 sec  
 D11 0.03000000 sec  
 TD0 1

==== CHANNEL f1 =====  
 SFO1 100.6228298 MHz  
 NUC1 13C  
 P1 9.70 usec  
 PLW1 46.98899841 W

==== CHANNEL f2 =====  
 SFO2 400.1316005 MHz  
 NUC2 1H  
 CPDPRG[2] waltz16  
 PCPD2 90.00 usec  
 PLW2 11.99499989 W  
 PLW12 0.34213999 W  
 PLW13 0.27713001 W

F2 - Processing parameters  
 SI 32768  
 SF 100.6127744 MHz  
 WDW EM  
 SSB 0  
 LB 1.00 Hz  
 GB 0  
 PC 1.40

**Supplementary Figure 82. <sup>13</sup>C NMR spectrum for 3f**

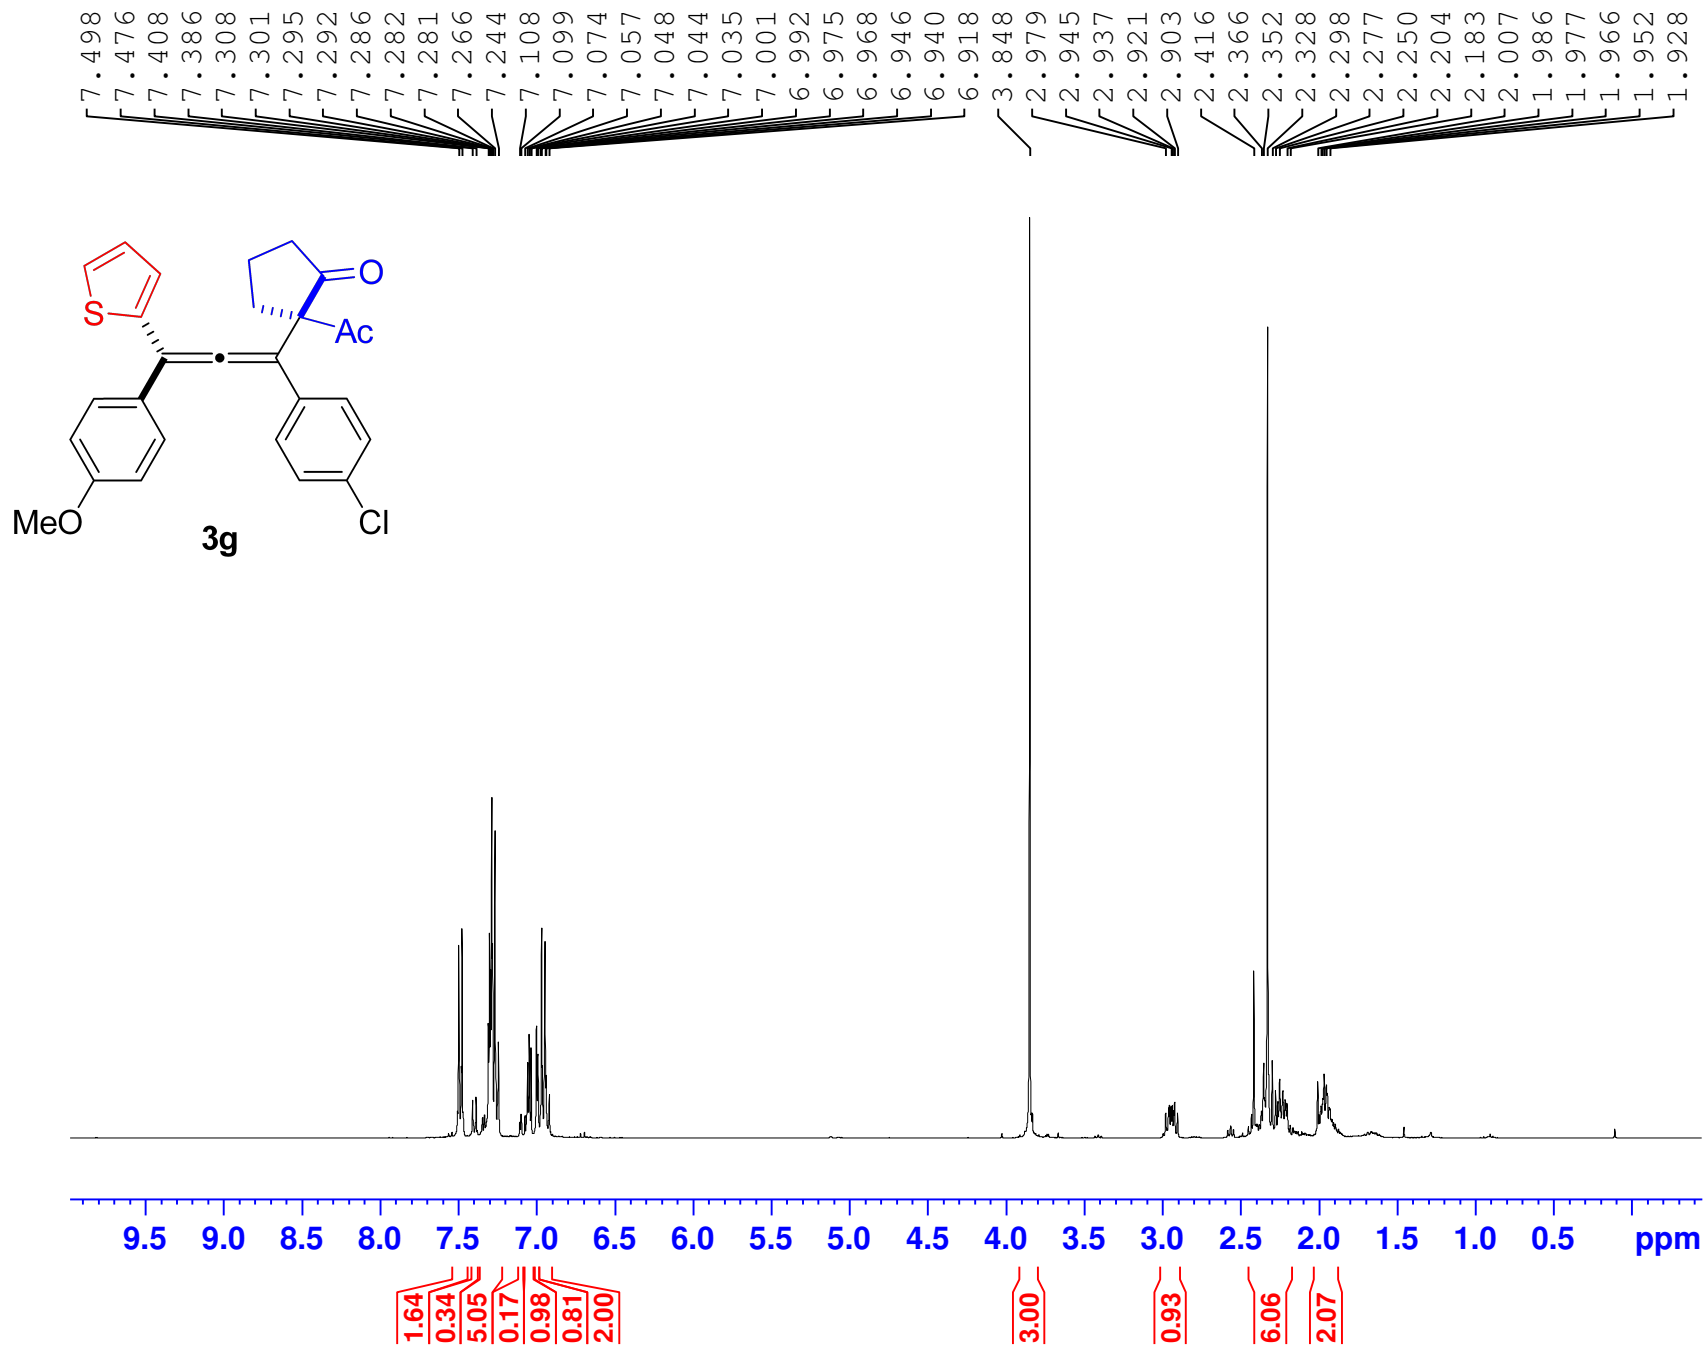

Supplementary Figure 83. <sup>1</sup>H NMR spectrum for 3g



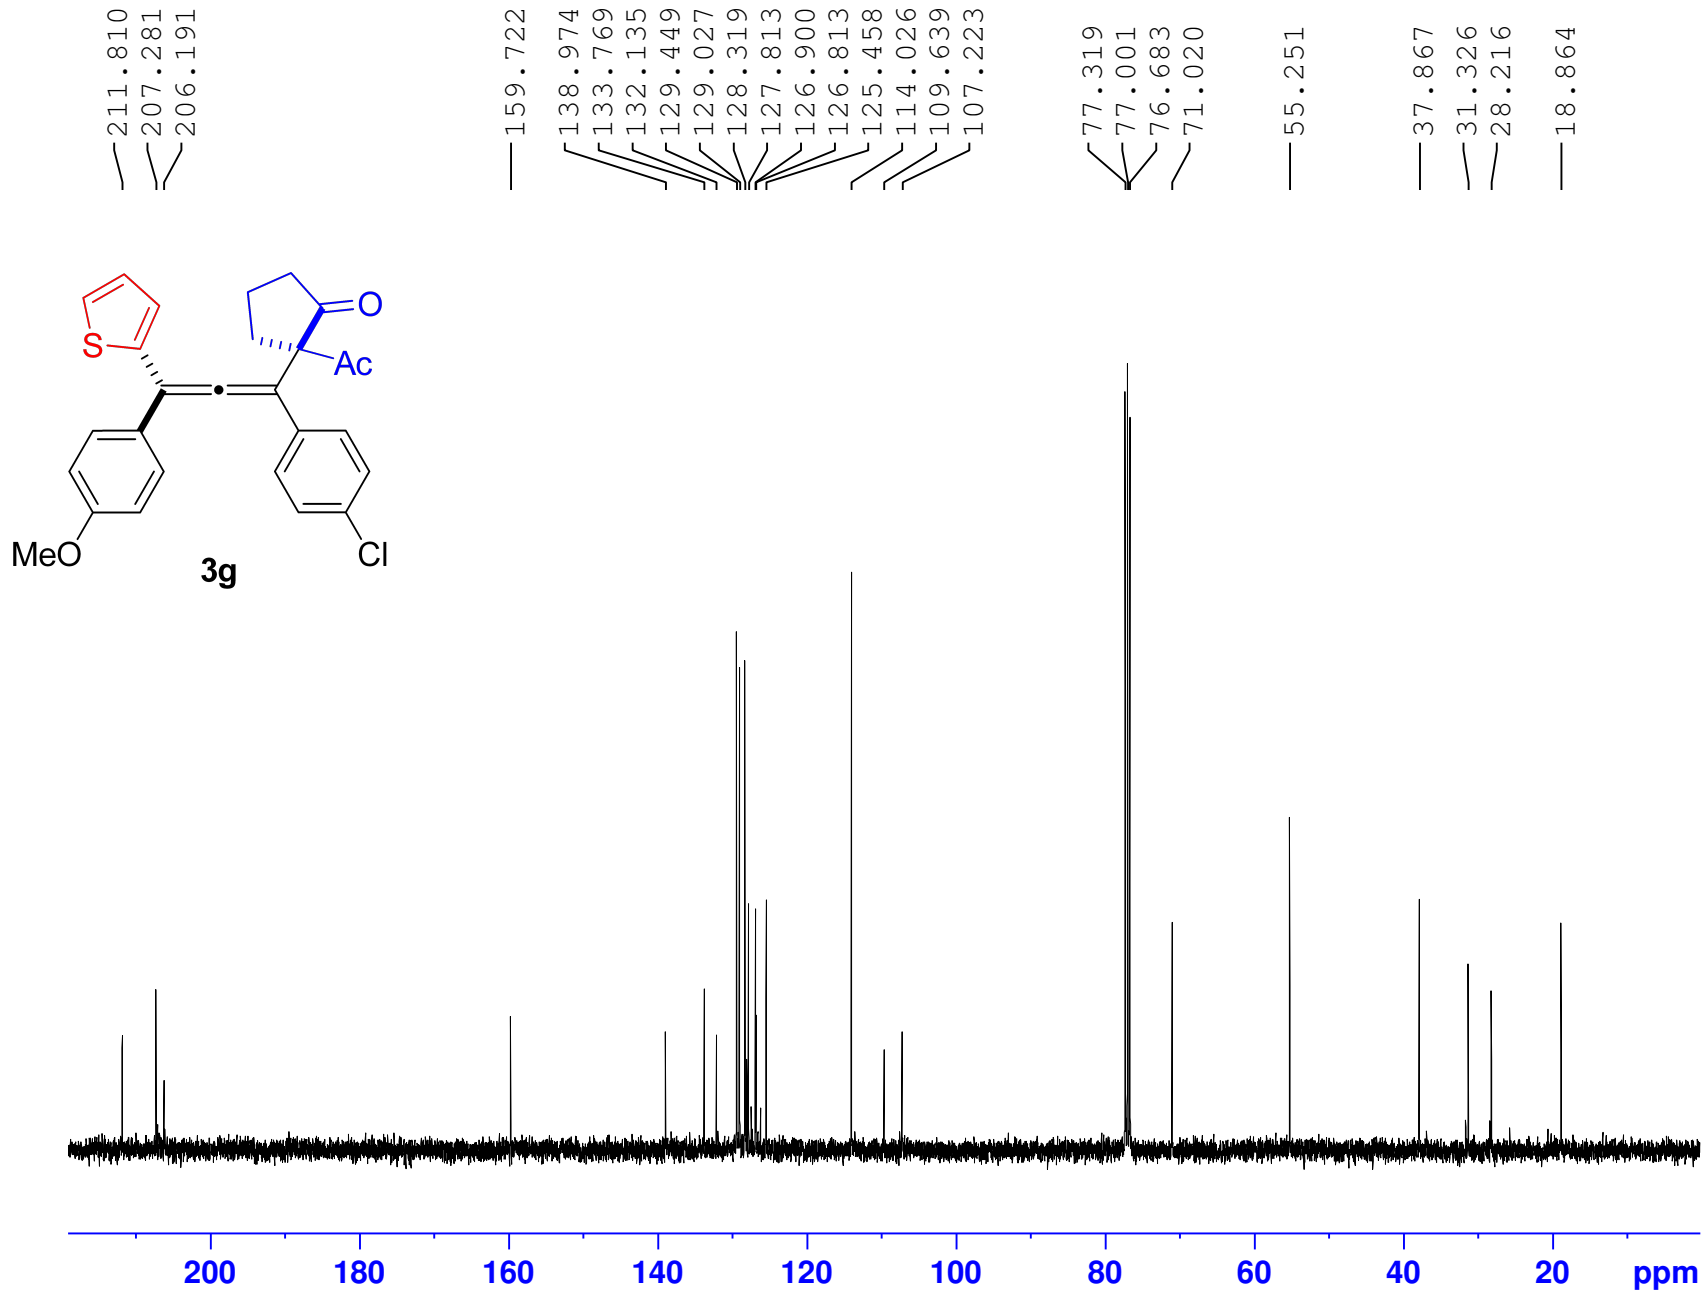

Current Data Parameters  
 NAME qdy-40018-4 C  
 EXPNO 1  
 PROCNO 1

F2 - Acquisition Parameters  
 Date\_ 20161219  
 Time 19.24  
 INSTRUM spect  
 PROBHD 5 mm PABBO BB/  
 PULPROG zgpg30  
 TD 65536  
 SOLVENT CDC13  
 NS 60  
 DS 0  
 SWH 24038.461 Hz  
 FIDRES 0.366798 Hz  
 AQ 1.3631488 sec  
 RG 196.92  
 DW 20.800 usec  
 DE 6.50 usec  
 TE 296.5 K  
 D1 2.00000000 sec  
 D11 0.03000000 sec  
 TD0 1

==== CHANNEL f1 =====  
 SFO1 100.6228298 MHz  
 NUC1 13C  
 P1 9.70 usec  
 PLW1 46.98899841 W

==== CHANNEL f2 =====  
 SFO2 400.1316005 MHz  
 NUC2 1H  
 CPDPRG[2] waltz16  
 PCPD2 90.00 usec  
 PLW2 11.99499989 W  
 PLW12 0.34213999 W  
 PLW13 0.27713001 W

F2 - Processing parameters  
 SI 32768  
 SF 100.6127773 MHz  
 WDW EM  
 SSB 0  
 LB 1.00 Hz  
 GB 0  
 PC 1.40

**Supplementary Figure 84. <sup>13</sup>C NMR spectrum for 3g**

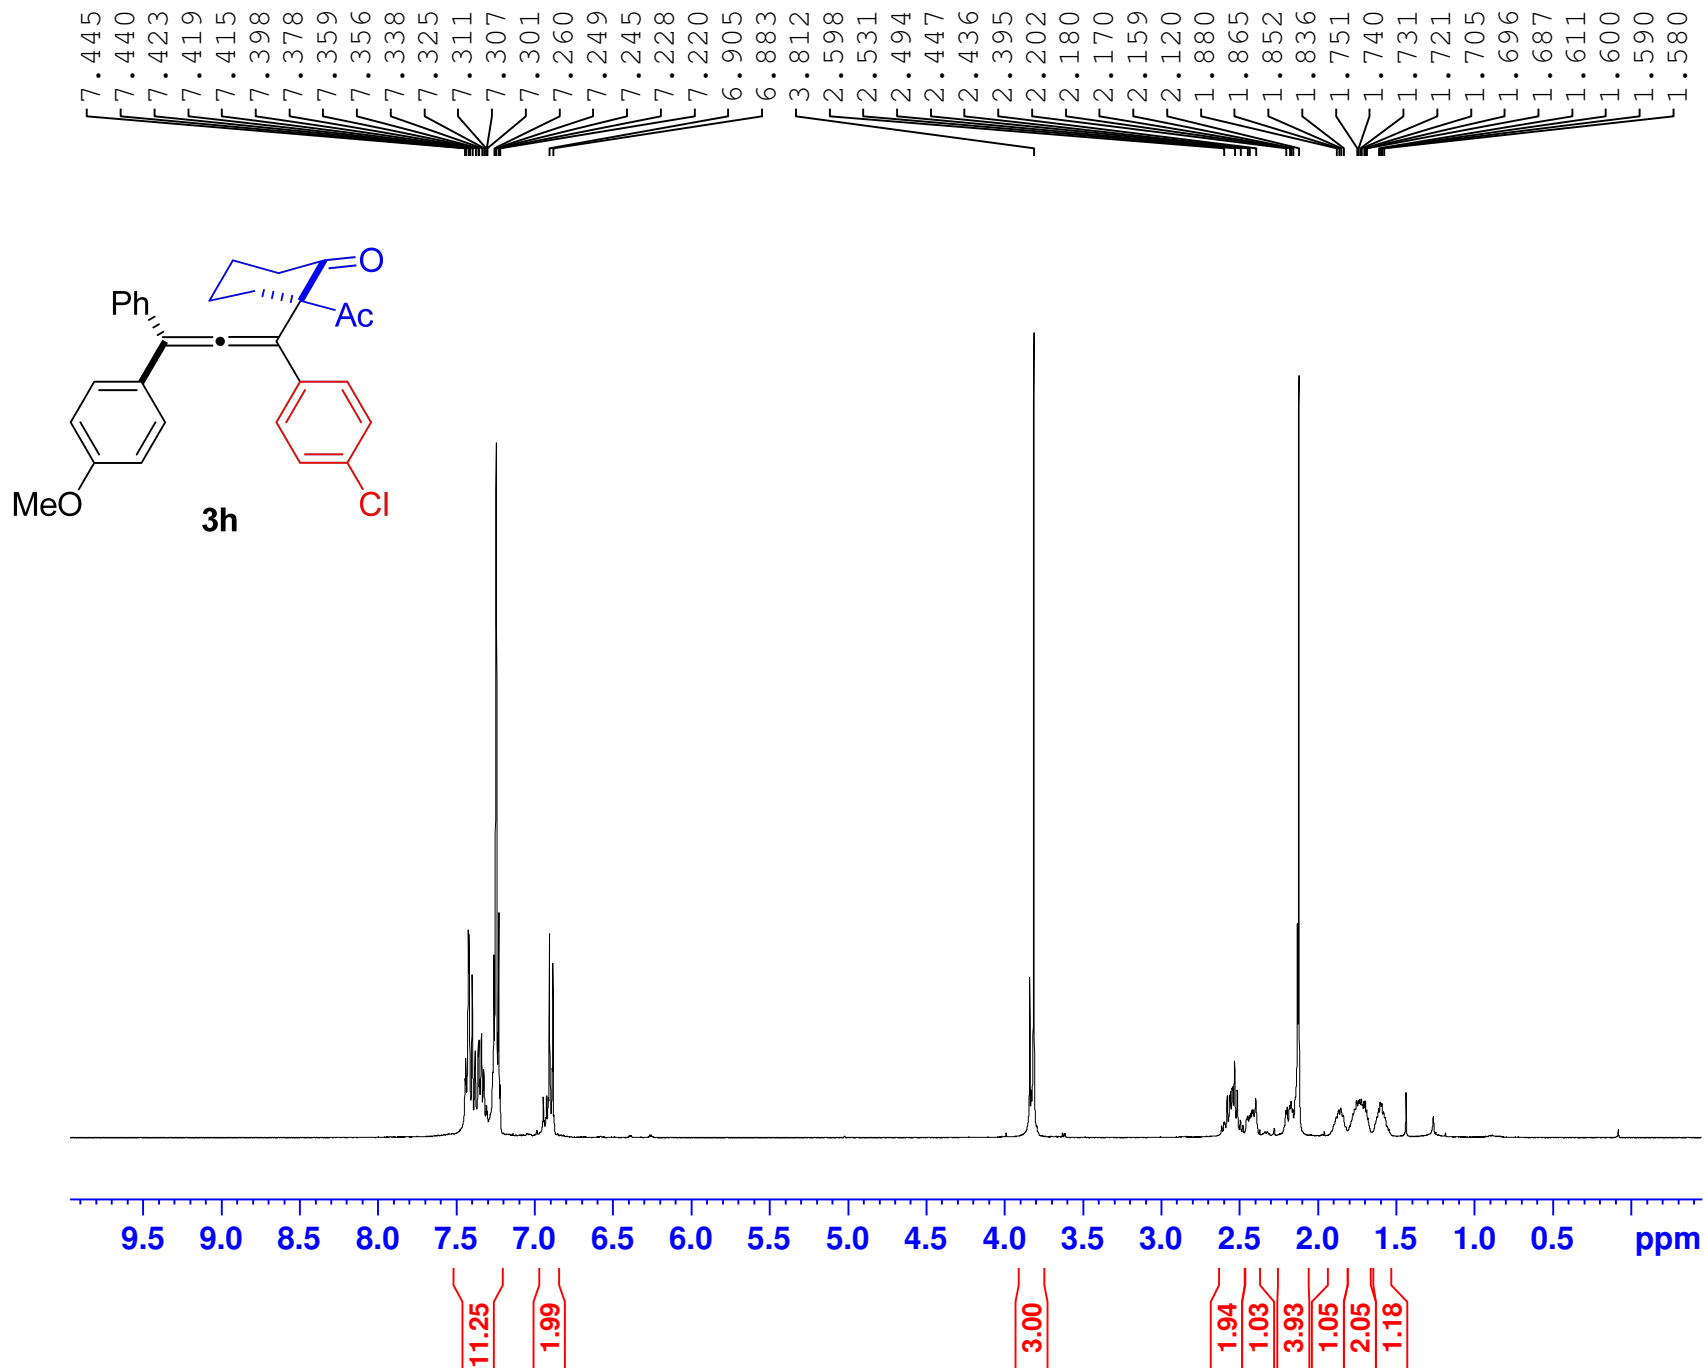

Supplementary Figure 85. <sup>1</sup>H NMR spectrum for 3h

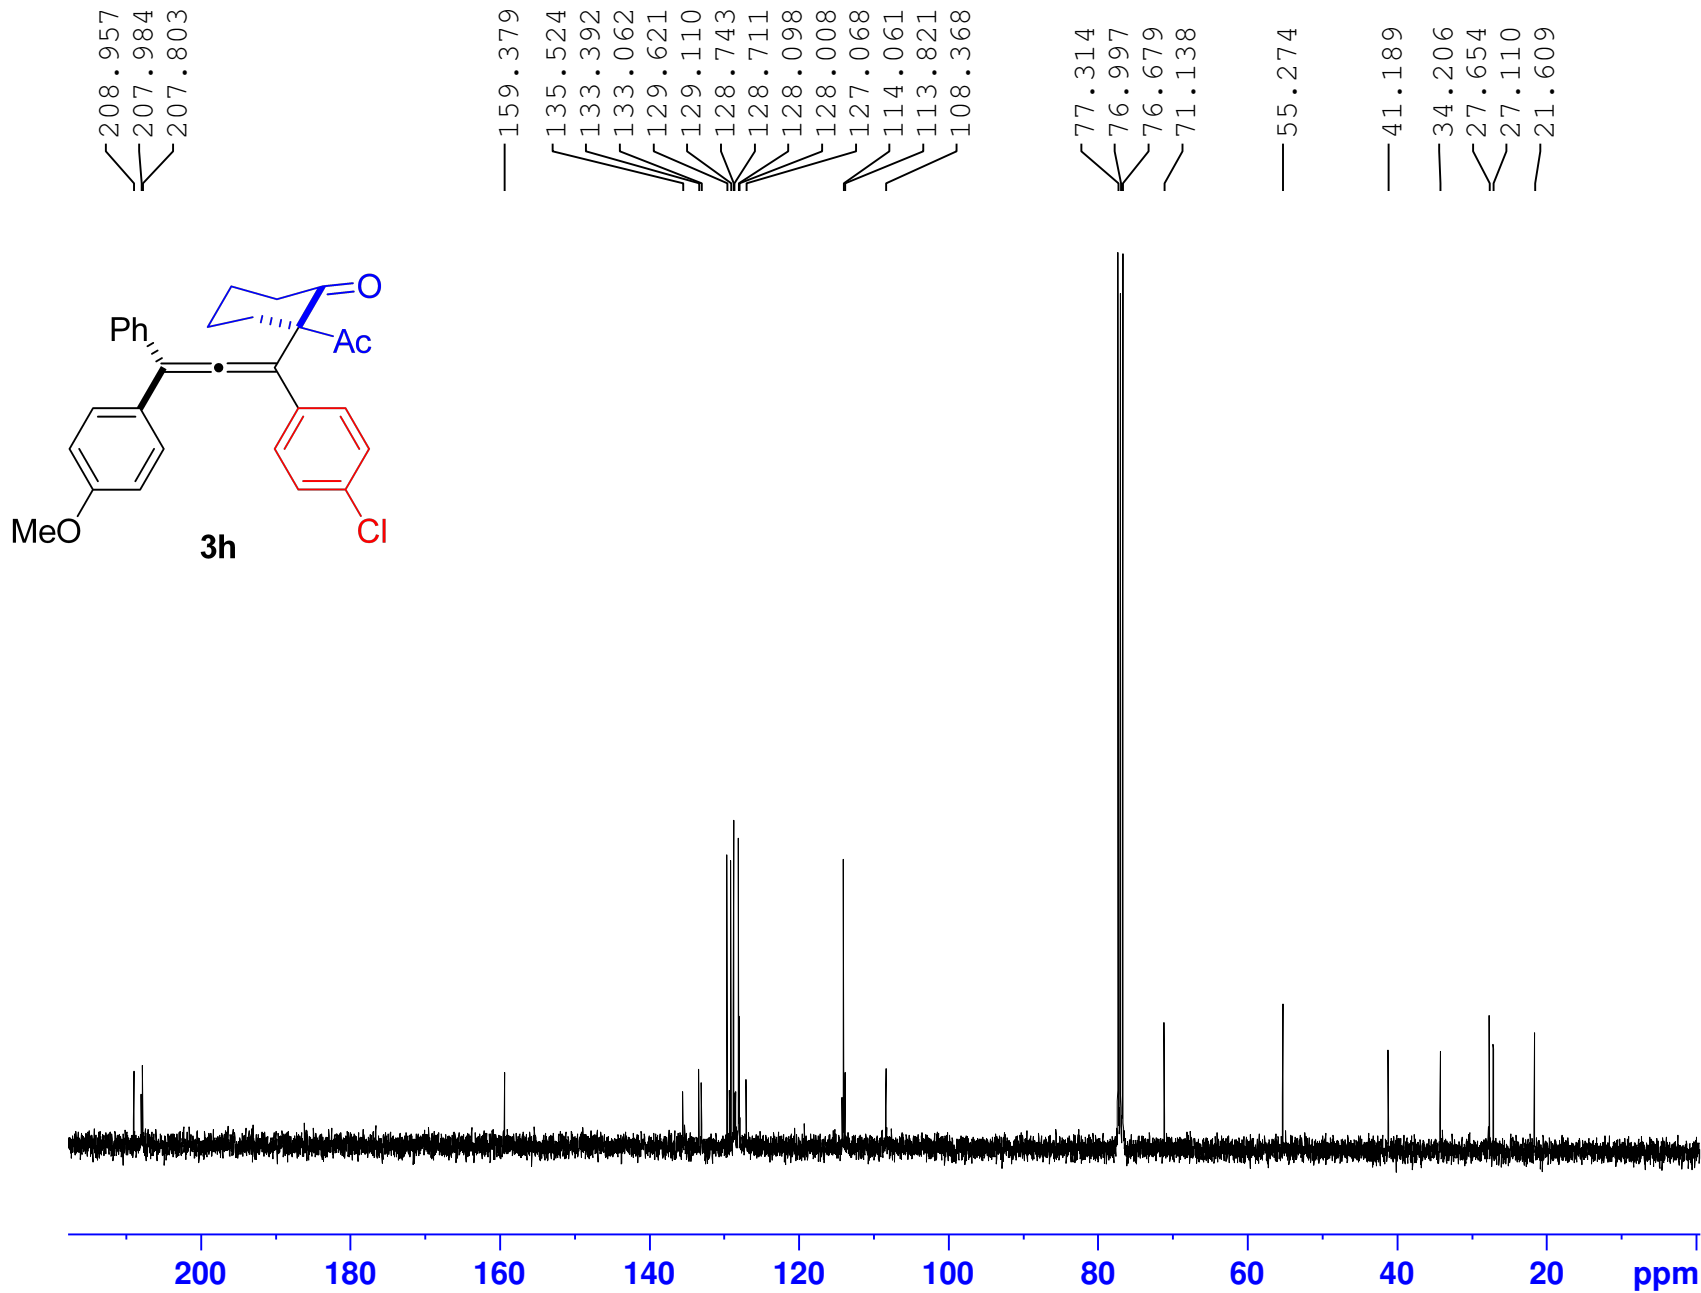

Current Data Parameters  
 NAME qdy-40023-4 C  
 EXPNO 1  
 PROCNO 1

F2 - Acquisition Parameters  
 Date\_ 20161228  
 Time 20.20  
 INSTRUM spect  
 PROBHD 5 mm DUL 13C-1  
 PULPROG zgpg30  
 TD 65536  
 SOLVENT CDC13  
 NS 161  
 DS 0  
 SWH 24038.461 Hz  
 FIDRES 0.366798 Hz  
 AQ 1.3631488 sec  
 RG 196.92  
 DW 20.800 usec  
 DE 6.50 usec  
 TE 295.1 K  
 D1 2.00000000 sec  
 D11 0.03000000 sec  
 TD0 1

==== CHANNEL f1 =====  
 SFO1 100.6228298 MHz  
 NUC1 13C  
 P1 9.60 usec  
 PLW1 31.98900032 W

==== CHANNEL f2 =====  
 SFO2 400.1316005 MHz  
 NUC2 1H  
 CPDPRG[2] waltz16  
 PCPD2 90.00 usec  
 PLW2 9.10000038 W  
 PLW12 0.24608000 W  
 PLW13 0.19933000 W

F2 - Processing parameters  
 SI 32768  
 SF 100.6127743 MHz  
 WDW EM  
 SSB 0  
 LB 1.00 Hz  
 GB 0  
 PC 1.40

Supplementary Figure 86. <sup>13</sup>C NMR spectrum for 3h

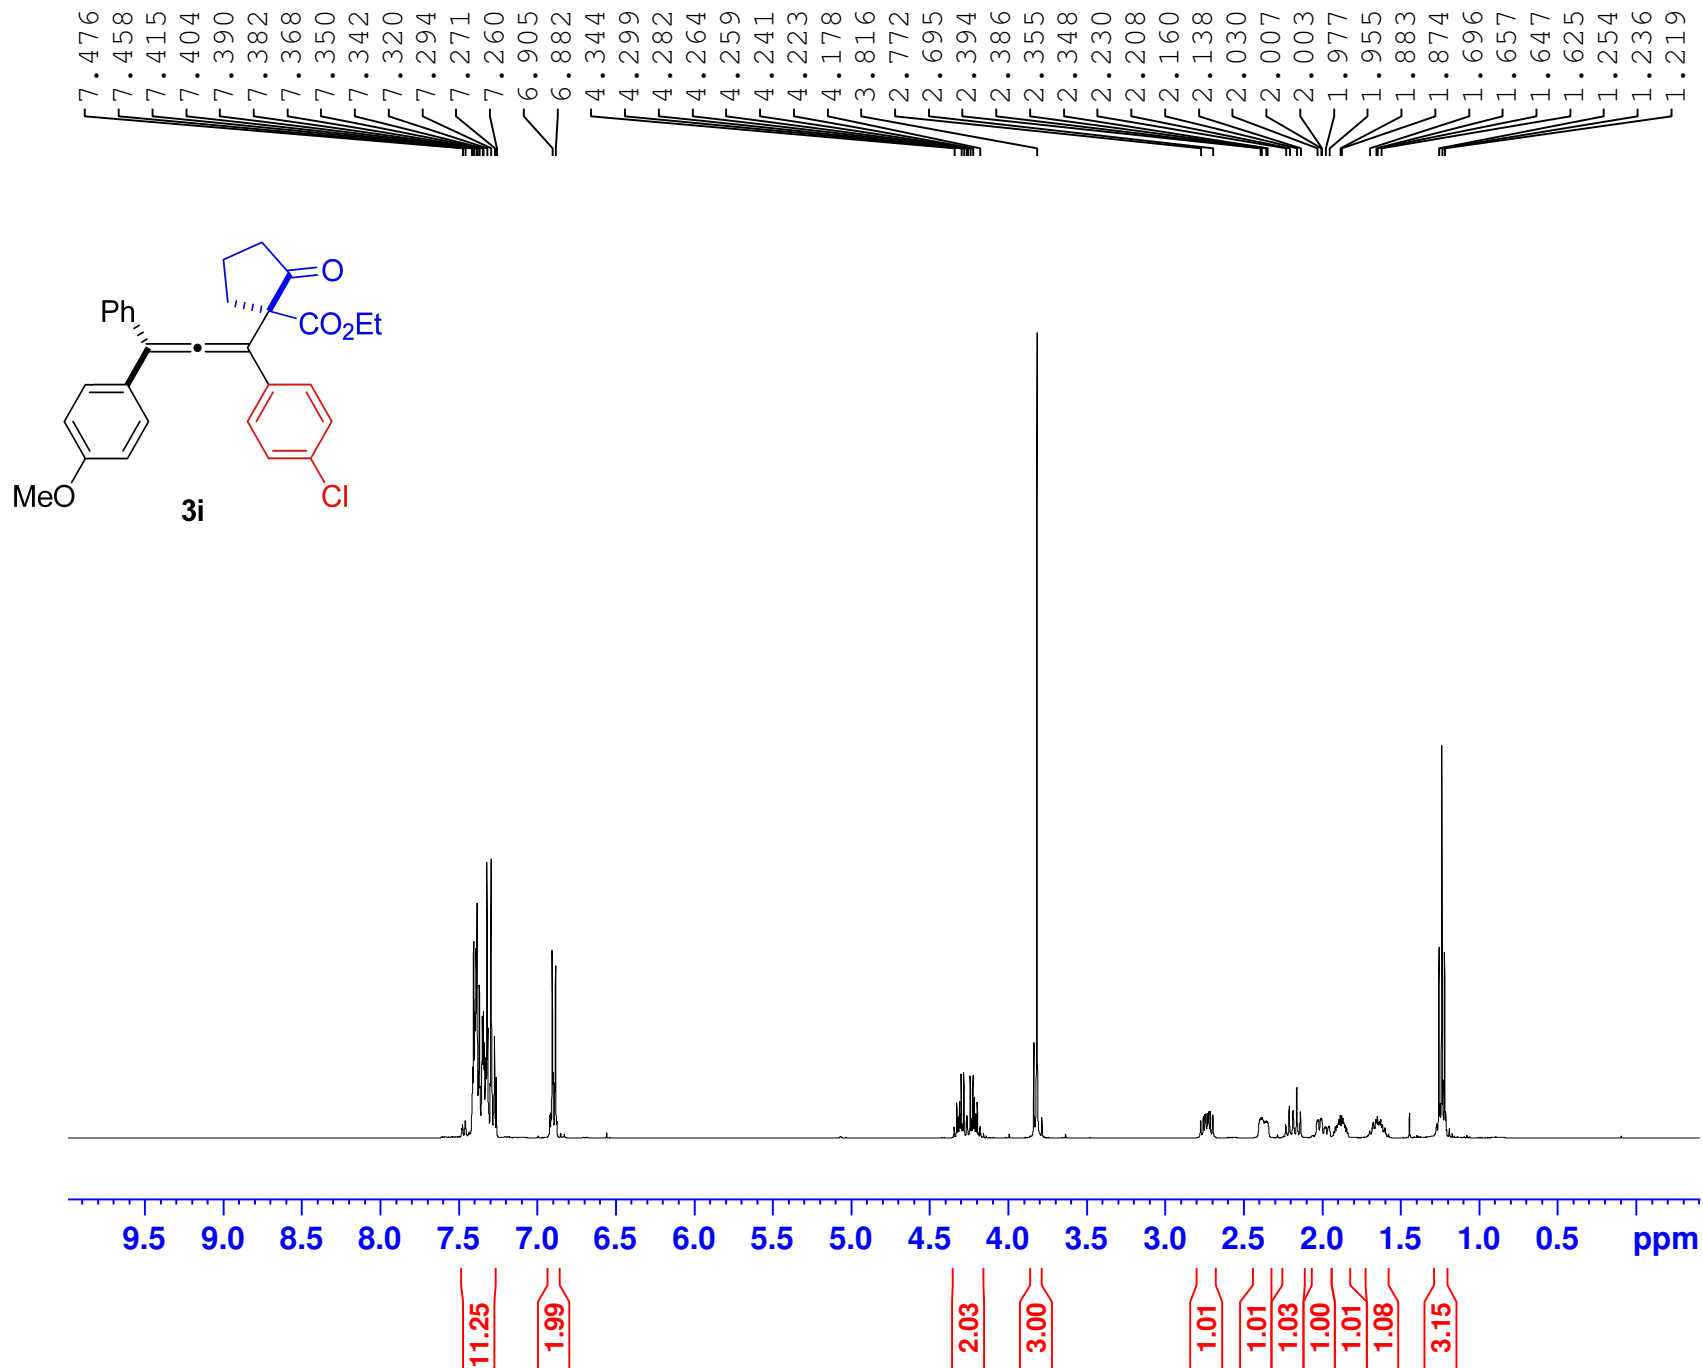

Supplementary Figure 87. <sup>1</sup>H NMR spectrum for 3i

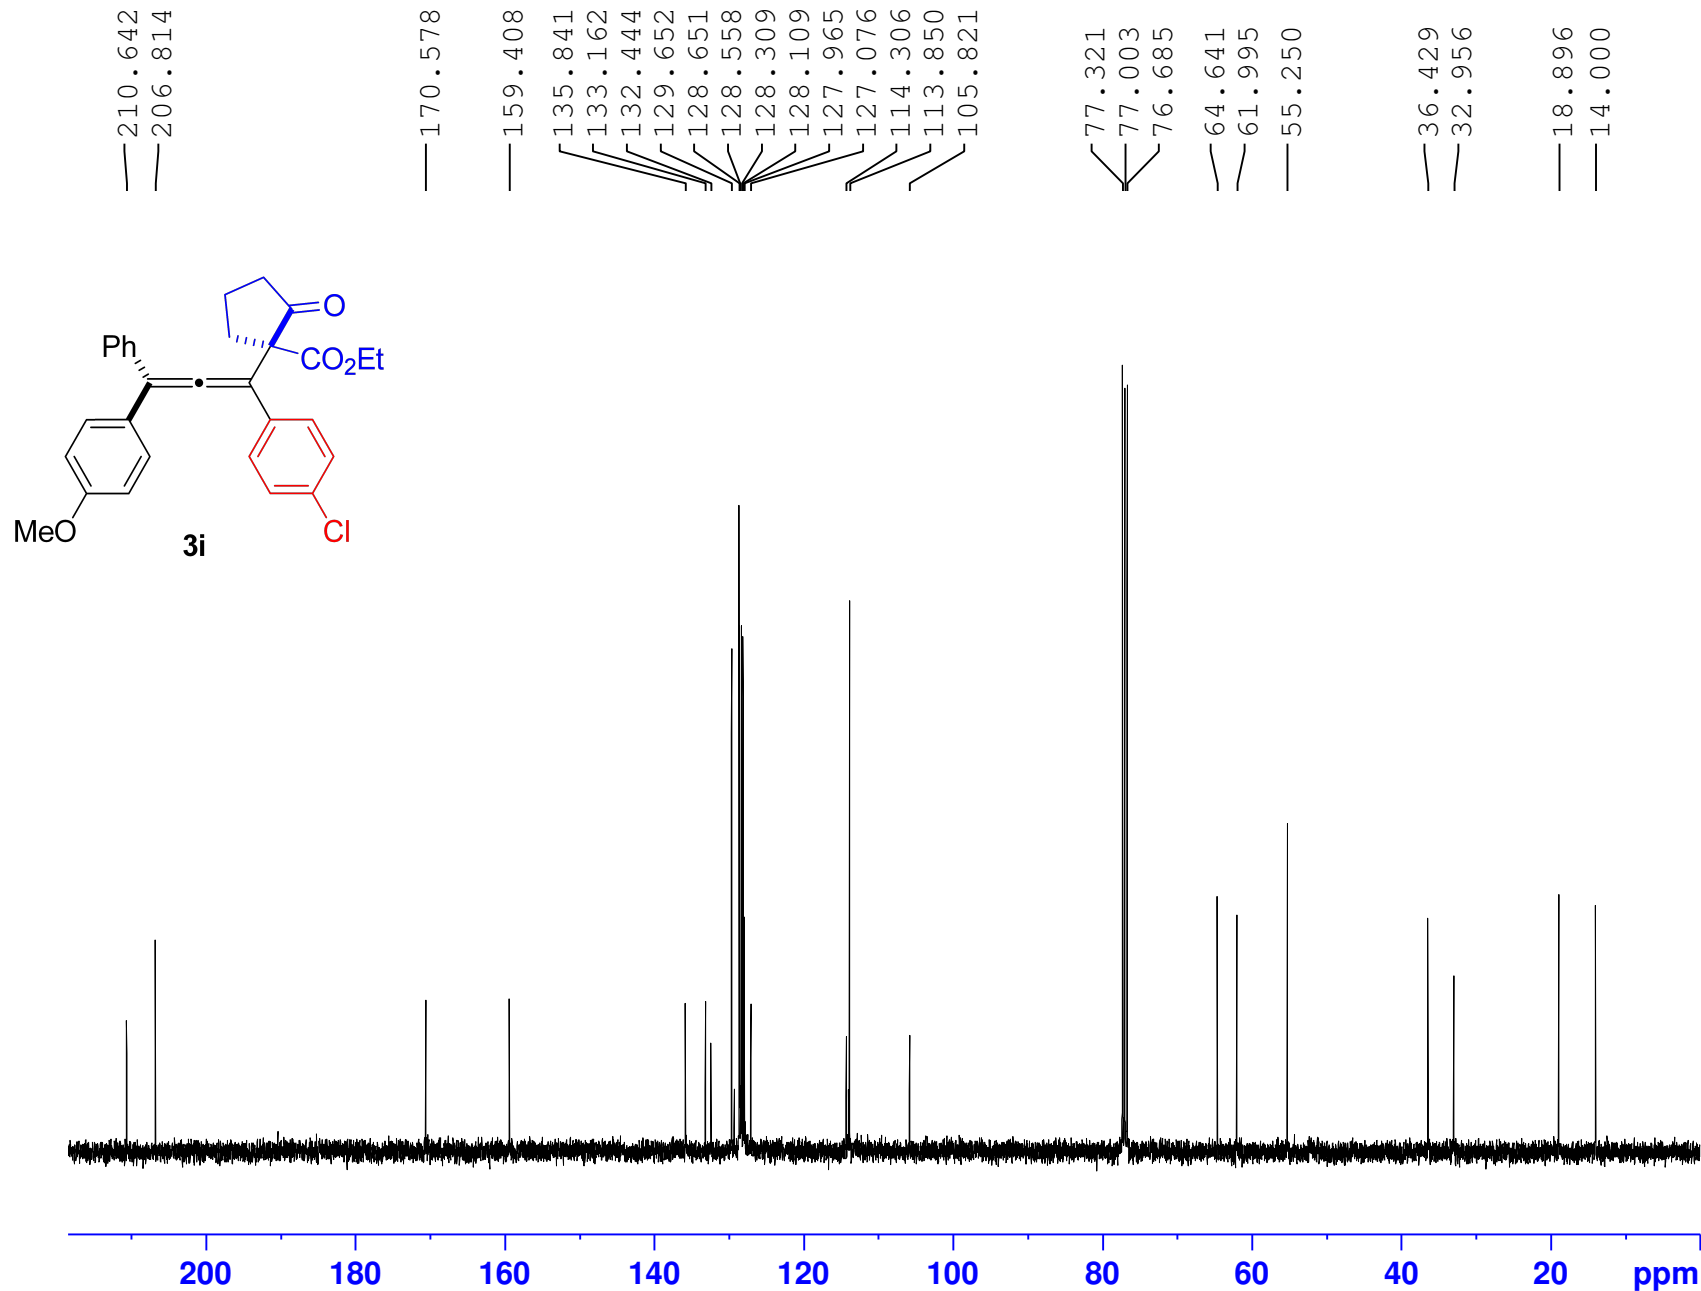

Current Data Parameters  
 NAME qdy-40023-2 C  
 EXPNO 1  
 PROCNO 1

F2 - Acquisition Parameters  
 Date\_ 20161228  
 Time 16.52  
 INSTRUM spect  
 PROBHD 5 mm DUL 13C-1  
 PULPROG zgpg30  
 TD 65536  
 SOLVENT CDC13  
 NS 57  
 DS 0  
 SWH 24038.461 Hz  
 FIDRES 0.366798 Hz  
 AQ 1.3631488 sec  
 RG 196.92  
 DW 20.800 usec  
 DE 6.50 usec  
 TE 295.8 K  
 D1 2.00000000 sec  
 D11 0.03000000 sec  
 TD0 1

===== CHANNEL f1 =====  
 SFO1 100.6228298 MHz  
 NUC1 13C  
 P1 9.60 usec  
 PLW1 31.98900032 W

===== CHANNEL f2 =====  
 SFO2 400.1316005 MHz  
 NUC2 1H  
 CPDPRG[2] waltz16  
 PCPD2 90.00 usec  
 PLW2 9.10000038 W  
 PLW12 0.24608000 W  
 PLW13 0.19933000 W

F2 - Processing parameters  
 SI 32768  
 SF 100.6127773 MHz  
 WDW EM  
 SSB 0  
 LB 1.00 Hz  
 GB 0  
 PC 1.40

Supplementary Figure 88. <sup>13</sup>C NMR spectrum for 3i

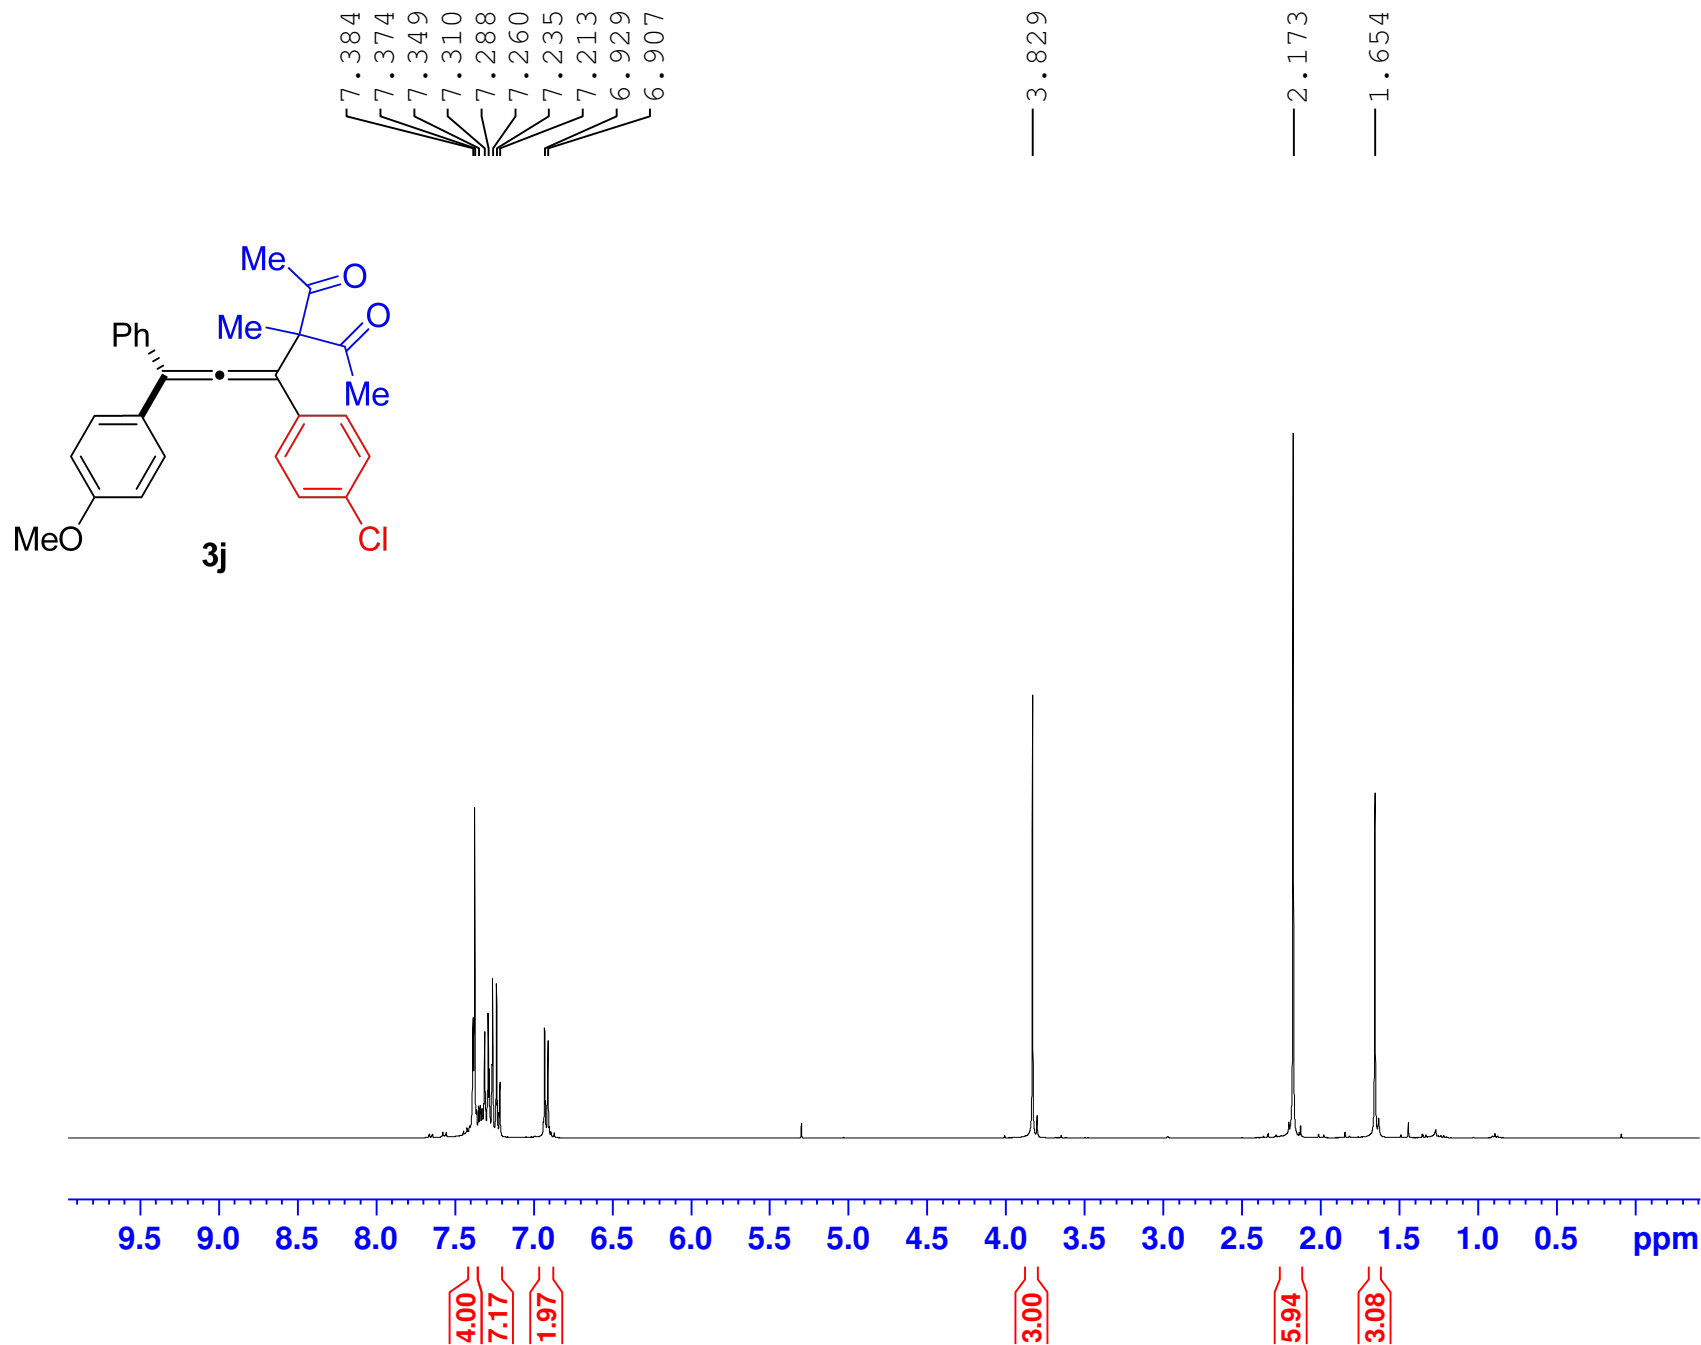

Current Data Parameters  
 NAME qdy-40023-3 H  
 EXPNO 1  
 PROCNO 1

F2 - Acquisition Parameters  
 Date\_ 20161224  
 Time 16.41  
 INSTRUM spect  
 PROBHD 5 mm PABBO BB/  
 PULPROG zg30  
 TD 65536  
 SOLVENT CDCl3  
 NS 4  
 DS 0  
 SWH 8012.820 Hz  
 FIDRES 0.122266 Hz  
 AQ 4.0894465 sec  
 RG 54.81  
 DW 62.400 usec  
 DE 6.50 usec  
 TE 295.2 K  
 D1 1.00000000 sec  
 TD0 1

==== CHANNEL f1 =====  
 SFO1 400.1324710 MHz  
 NUC1 1H  
 P1 14.50 usec  
 PLW1 11.99499989 W

F2 - Processing parameters  
 SI 65536  
 SF 400.1300077 MHz  
 WDW EM  
 SSB 0  
 LB 0.30 Hz  
 GB 0  
 PC 1.00

Supplementary Figure 89.  $^1\text{H}$  NMR spectrum for **3j**

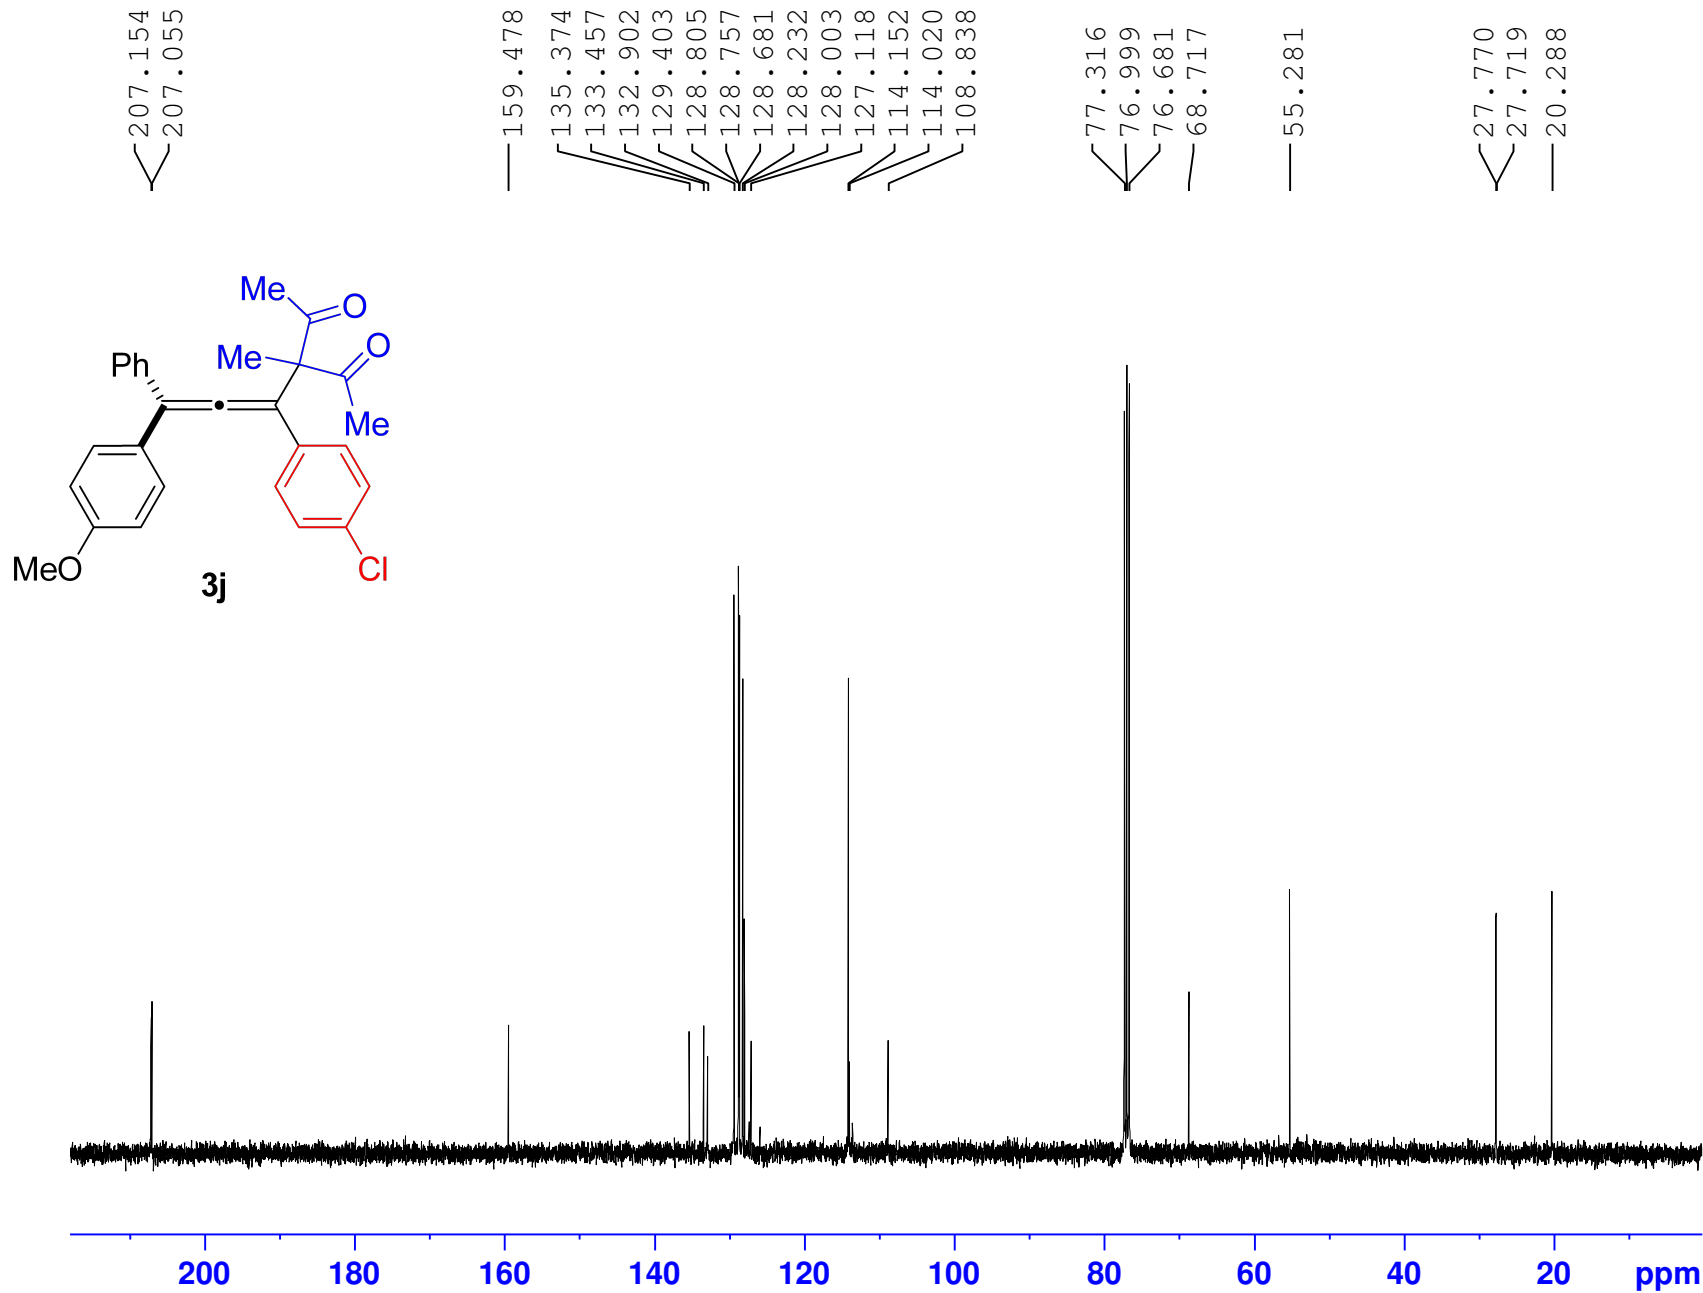

Current Data Parameters  
 NAME qdy-40023-3 C  
 EXPNO 1  
 PROCNO 1

F2 - Acquisition Parameters  
 Date\_ 20161224  
 Time 16.46  
 INSTRUM spect  
 PROBHD 5 mm PABBO BB/  
 PULPROG zgpg30  
 TD 65536  
 SOLVENT CDC13  
 NS 85  
 DS 0  
 SWH 24038.461 Hz  
 FIDRES 0.366798 Hz  
 AQ 1.3631488 sec  
 RG 196.92  
 DW 20.800 usec  
 DE 6.50 usec  
 TE 296.2 K  
 D1 2.00000000 sec  
 D11 0.03000000 sec  
 TD0 1

==== CHANNEL f1 =====  
 SFO1 100.6228298 MHz  
 NUC1 13C  
 P1 9.70 usec  
 PLW1 46.98899841 W

==== CHANNEL f2 =====  
 SFO2 400.1316005 MHz  
 NUC2 1H  
 CPDPRG[2] waltz16  
 PCPD2 90.00 usec  
 PLW2 11.99499989 W  
 PLW12 0.34213999 W  
 PLW13 0.27713001 W

F2 - Processing parameters  
 SI 32768  
 SF 100.6127751 MHz  
 WDW EM  
 SSB 0  
 LB 1.00 Hz  
 GB 0  
 PC 1.40

**Supplementary Figure 90. <sup>13</sup>C NMR spectrum for 3j**

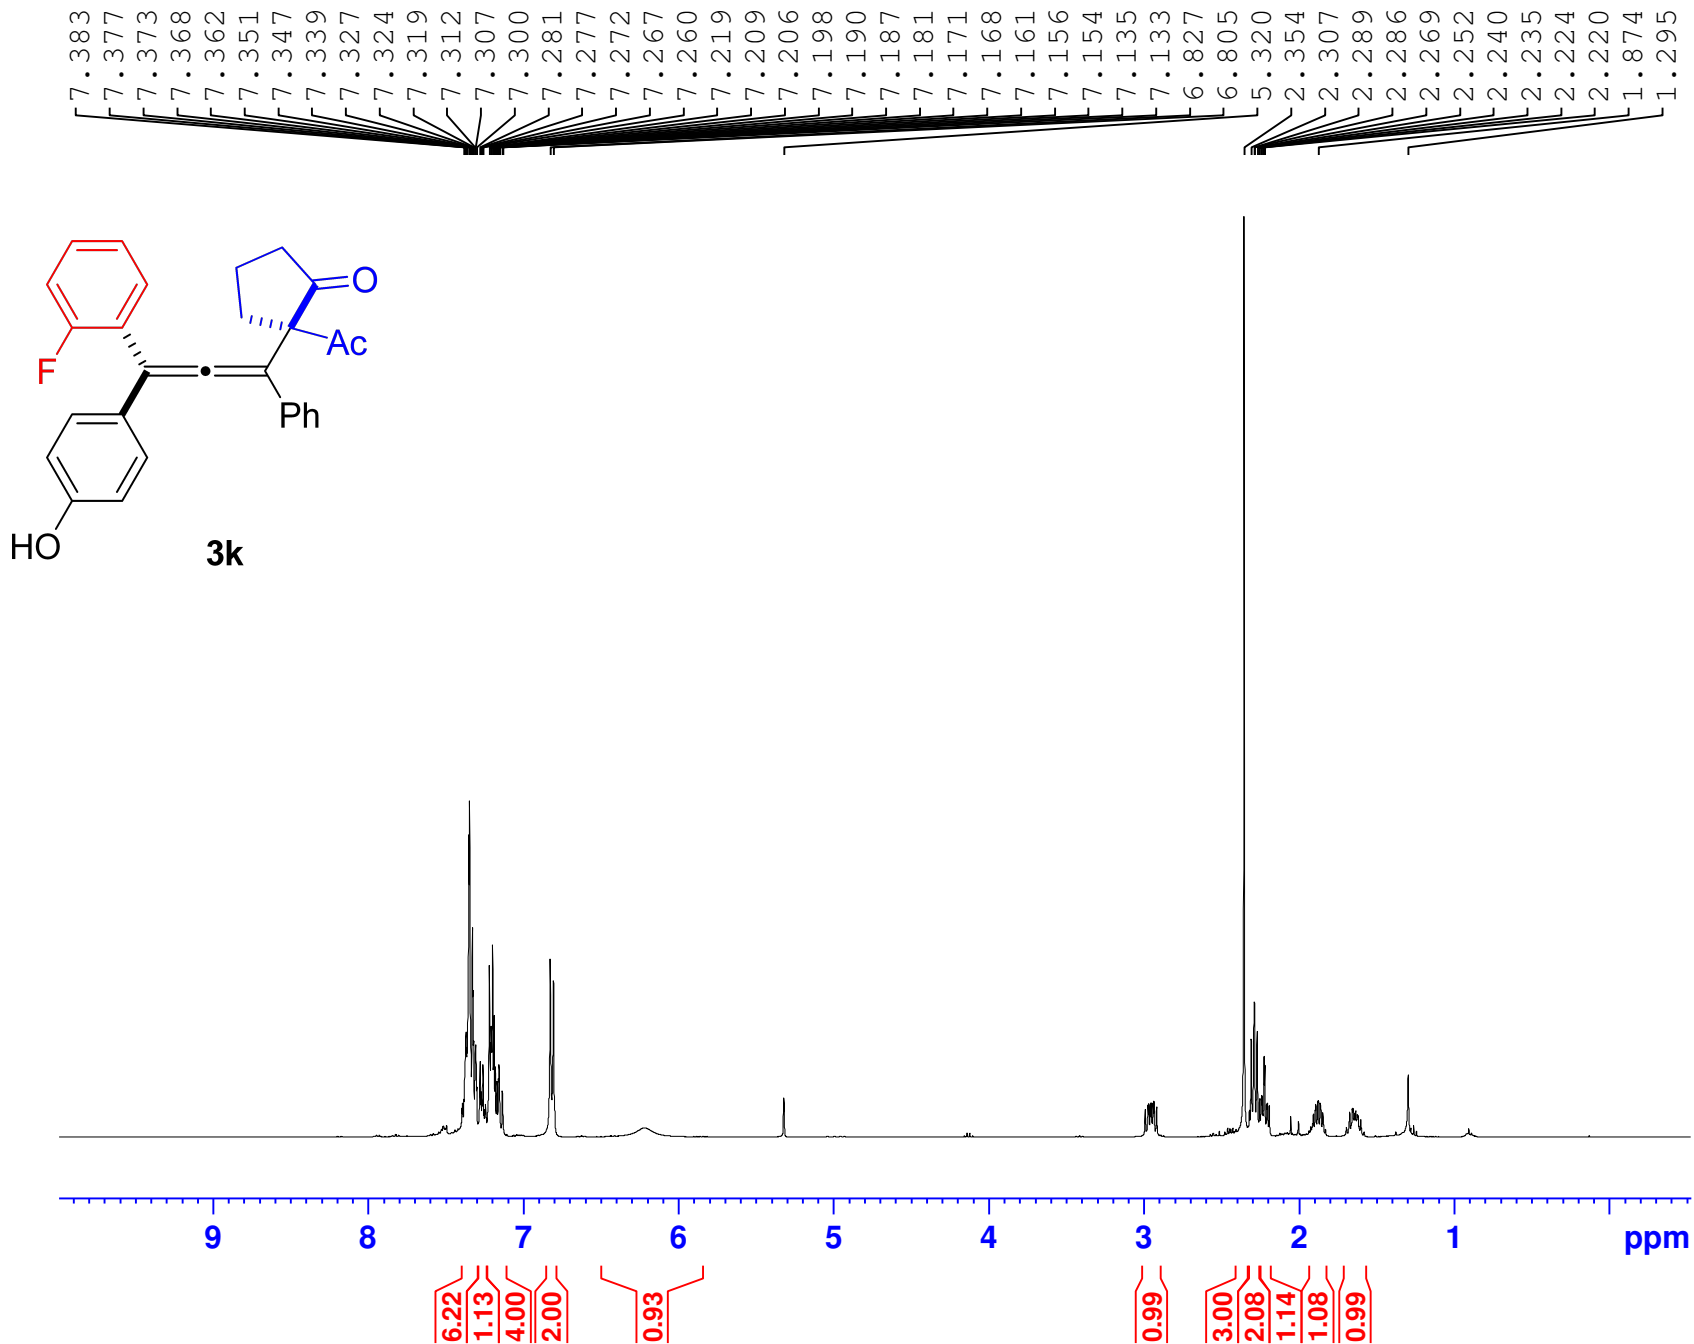

Current Data Parameters  
 NAME qdy-20093-2 H  
 EXPNO 1  
 PROCNO 1

F2 - Acquisition Parameters  
 Date\_ 20160326  
 Time 13.46  
 INSTRUM spect  
 PROBHD 5 mm PABBO BB/  
 PULPROG zg30  
 TD 65536  
 SOLVENT CD2C12  
 NS 5  
 DS 0  
 SWH 8012.820 Hz  
 FIDRES 0.122266 Hz  
 AQ 4.0894465 sec  
 RG 34.77  
 DW 62.400 usec  
 DE 6.50 usec  
 TE 296.8 K  
 D1 1.00000000 sec  
 TD0 1

==== CHANNEL f1 =====  
 SFO1 400.1324710 MHz  
 NUC1 1H  
 P1 14.50 usec  
 PLW1 11.99499989 W

F2 - Processing parameters  
 SI 65536  
 SF 400.1300152 MHz  
 WDW EM  
 SSB 0  
 LB 0.30 Hz  
 GB 0  
 PC 1.00

Supplementary Figure 91. <sup>1</sup>H NMR spectrum for 3k



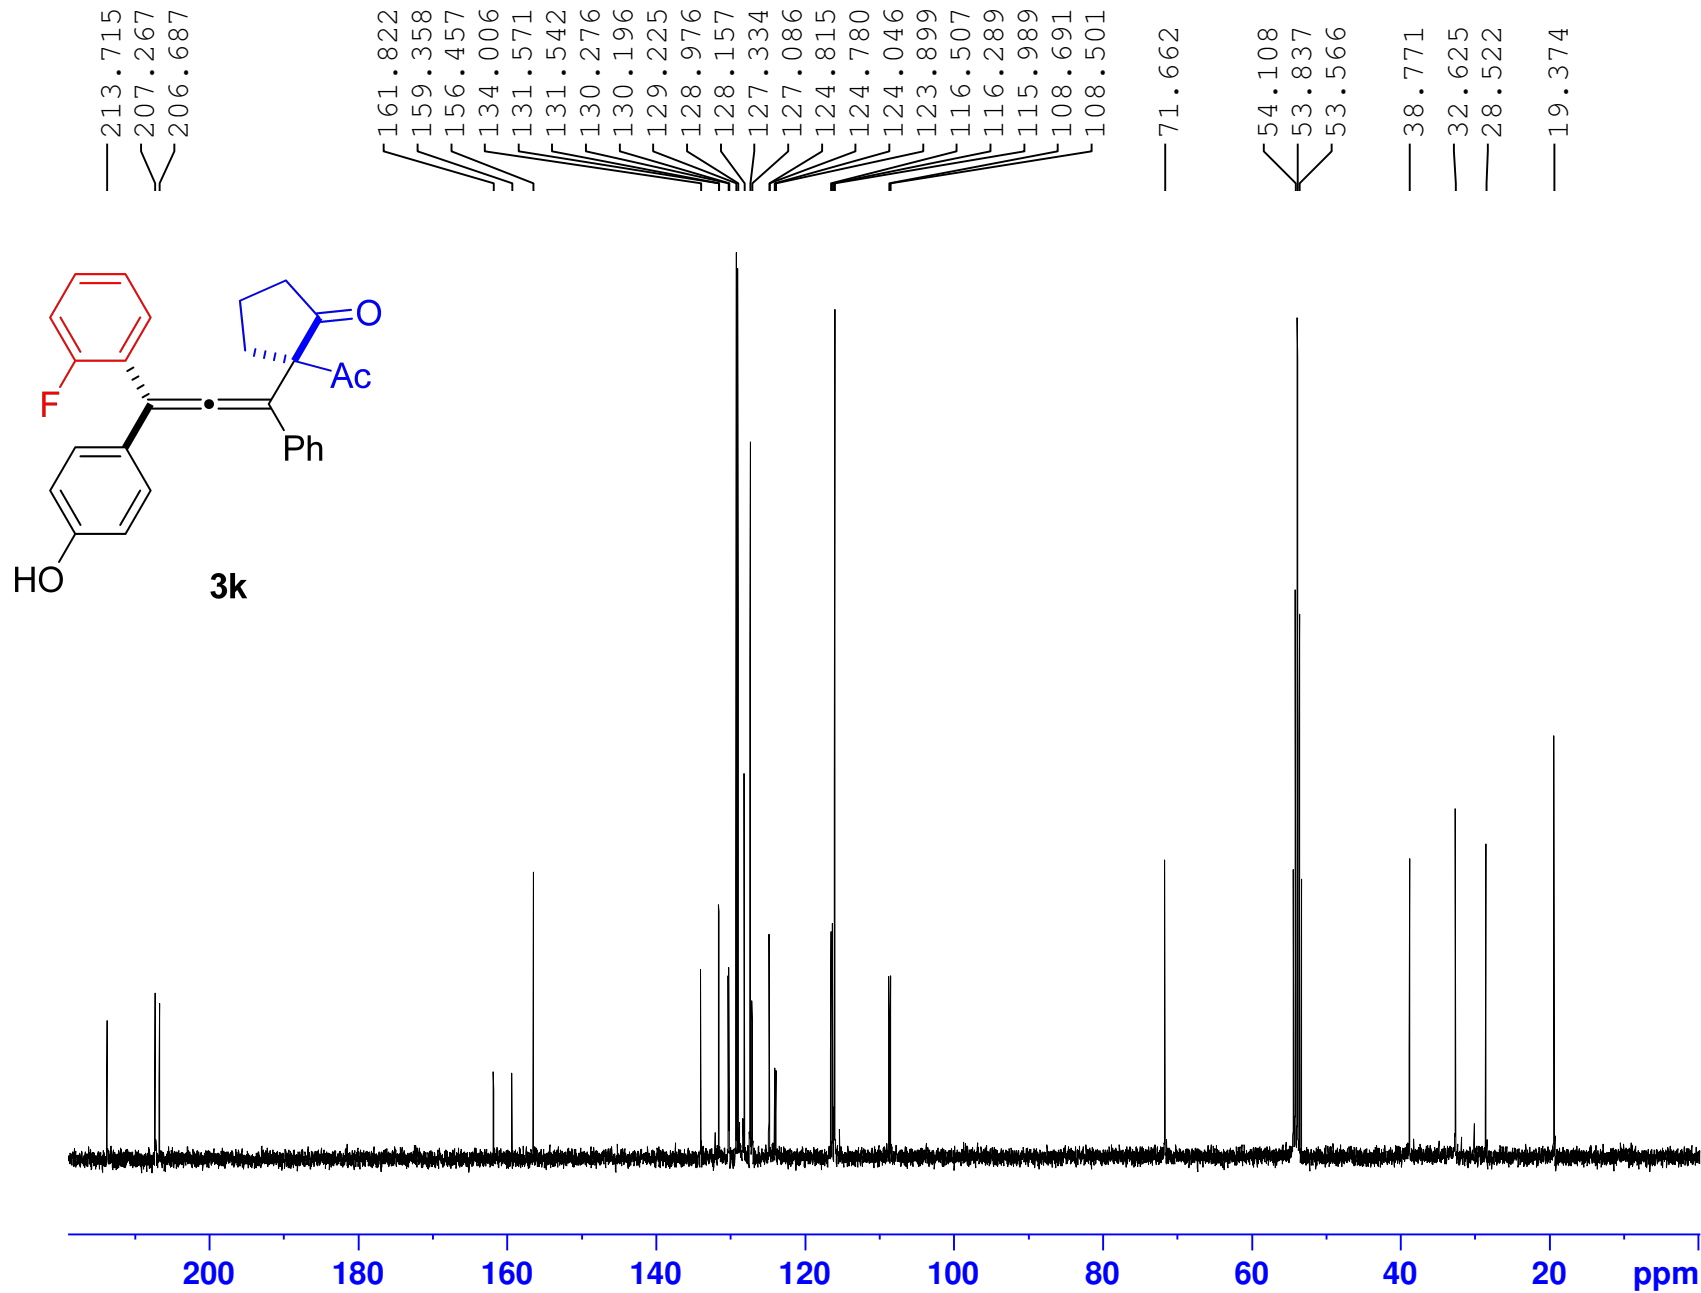

Current Data Parameters  
 NAME qdy-20093-2 C  
 EXPNO 1  
 PROCNO 1

F2 - Acquisition Parameters  
 Date\_ 20160326  
 Time 13.52  
 INSTRUM spect  
 PROBHD 5 mm PABBO BB/  
 PULPROG zgpg30  
 TD 65536  
 SOLVENT CD2C12  
 NS 96  
 DS 0  
 SWH 24038.461 Hz  
 FIDRES 0.366798 Hz  
 AQ 1.3631488 sec  
 RG 196.92  
 DW 20.800 usec  
 DE 6.50 usec  
 TE 297.8 K  
 D1 2.00000000 sec  
 D11 0.03000000 sec  
 TD0 1

==== CHANNEL f1 =====  
 SFO1 100.6228298 MHz  
 NUC1 13C  
 P1 9.70 usec  
 PLW1 46.98899841 W

==== CHANNEL f2 =====  
 SFO2 400.1316005 MHz  
 NUC2 1H  
 CPDPRG[2] waltz16  
 PCPD2 90.00 usec  
 PLW2 11.99499989 W  
 PLW12 0.34213999 W  
 PLW13 0.27713001 W

F2 - Processing parameters  
 SI 32768  
 SF 100.6127307 MHz  
 WDW EM  
 SSB 0  
 LB 1.00 Hz  
 GB 0  
 PC 1.40

Supplementary Figure 92. <sup>13</sup>C NMR spectrum for 3k

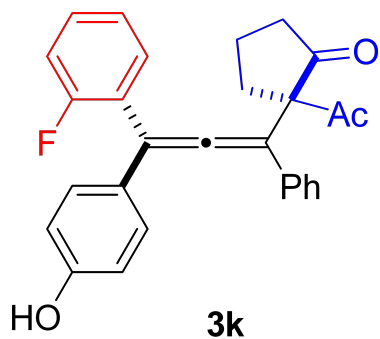

— -112.907



Current Data Parameters  
 NAME qdy-20093-2 F  
 EXPNO 1  
 PROCNO 1

F2 - Acquisition Parameters  
 Date\_ 20160326  
 Time 13.56  
 INSTRUM spect  
 PROBHD 5 mm PABBO BB/  
 PULPROG zgpg30  
 TD 65536  
 SOLVENT CD2C12  
 NS 35  
 DS 2  
 SWH 93750.000 Hz  
 FIDRES 1.430511 Hz  
 AQ 0.3495253 sec  
 RG 196.92  
 DW 5.333 usec  
 DE 6.50 usec  
 TE 297.6 K  
 D1 2.00000000 sec  
 D11 0.03000000 sec  
 TD0 1

==== CHANNEL f1 =====  
 SFO1 376.4607162 MHz  
 NUC1 19F  
 P1 14.70 usec  
 PLW1 15.99600029 W

==== CHANNEL f2 =====  
 SFO2 400.1316005 MHz  
 NUC2 1H  
 CPDPRG[2] waltz16  
 PCPD2 90.00 usec  
 PLW2 11.99499989 W  
 PLW12 0.34213999 W  
 PLW13 0.27713001 W

F2 - Processing parameters  
 SI 32768  
 SF 376.4983660 MHz  
 WDW EM  
 SSB 0  
 LB 1.00 Hz  
 GB 0  
 PC 1.40

**Supplementary Figure 93. <sup>19</sup>F NMR spectrum for 3k**

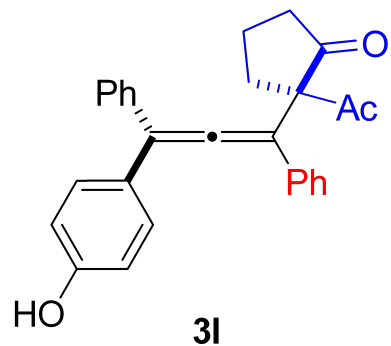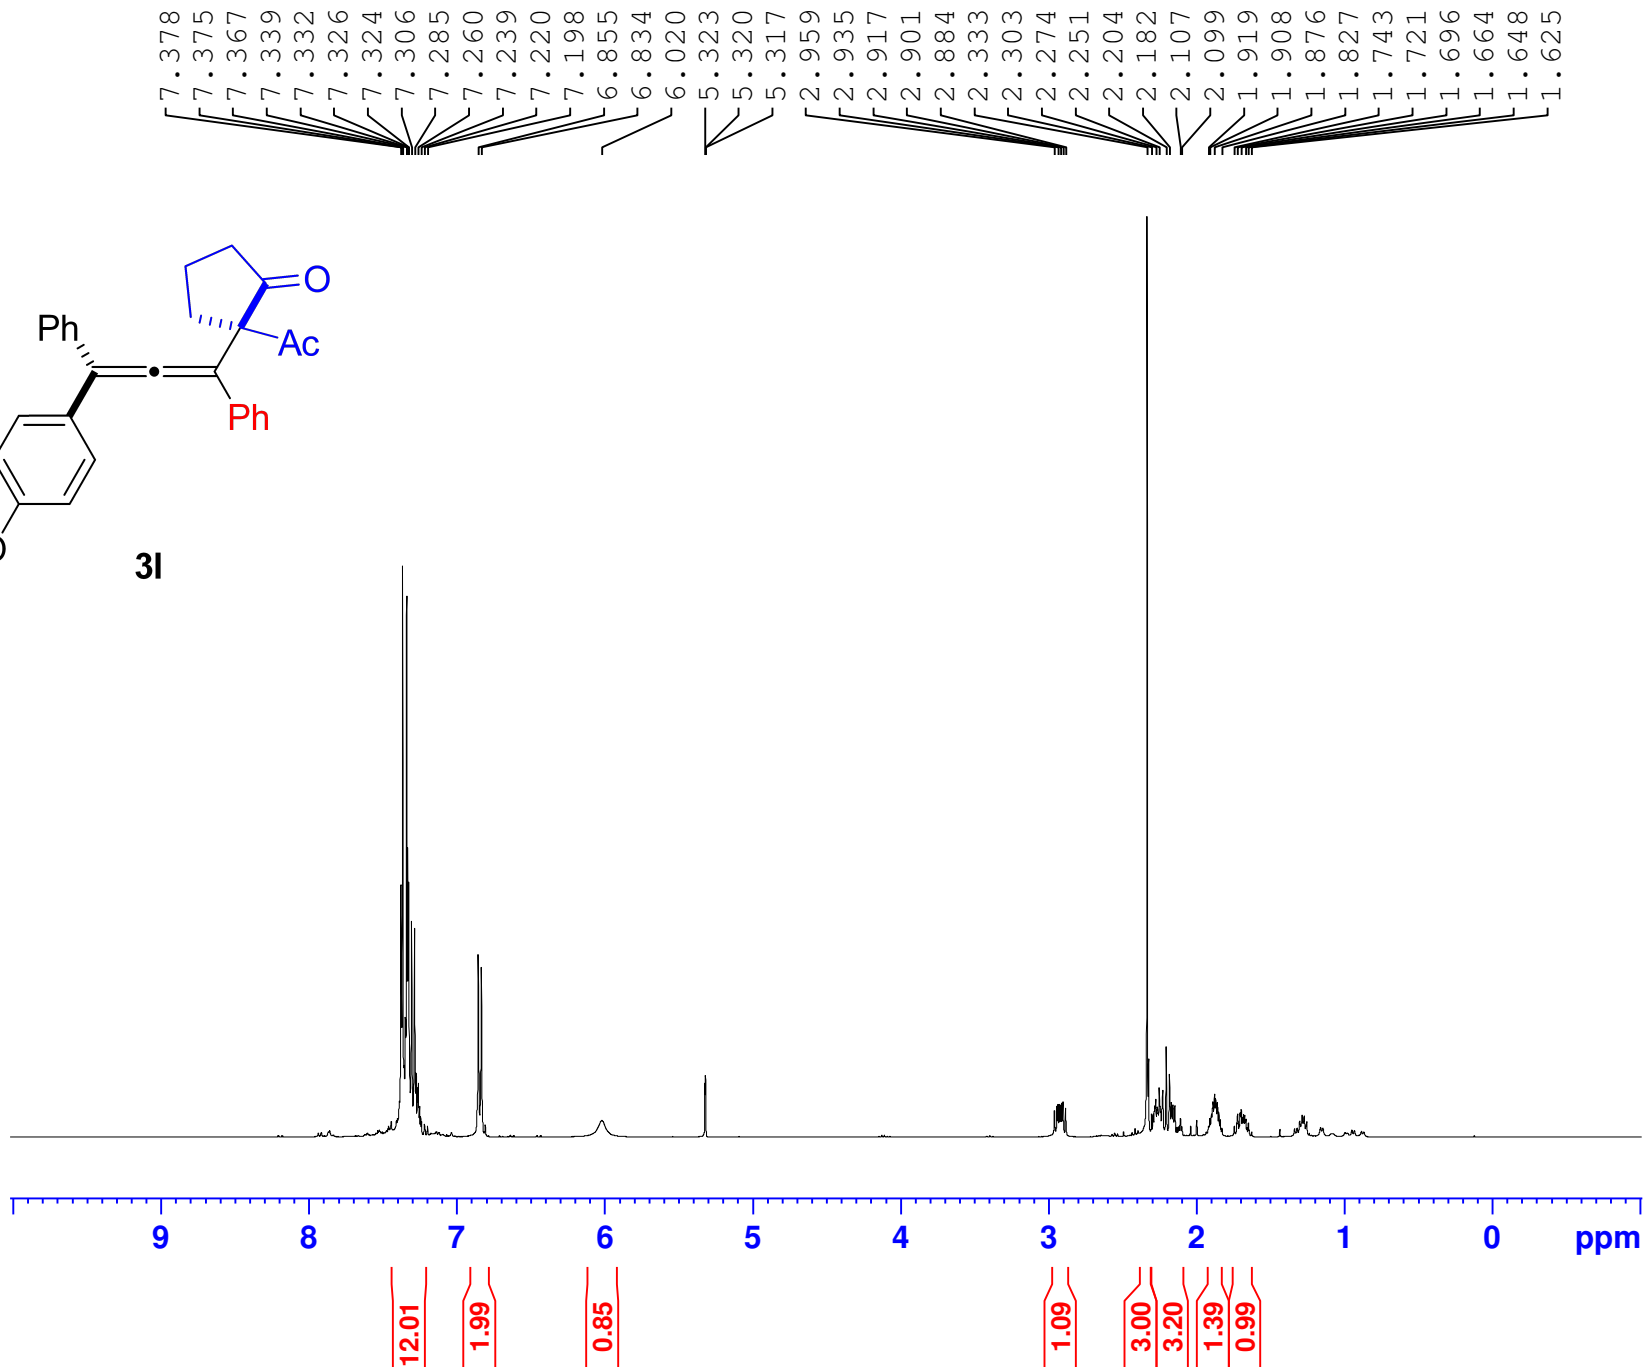

Current Data Parameters  
 NAME qdy-20112-3 H  
 EXPNO 1  
 PROCNO 2

F2 - Acquisition Parameters  
 Date\_ 20160604  
 Time 22.04  
 INSTRUM spect  
 PROBHD 5 mm PABBO BB/  
 PULPROG zg30  
 TD 65536  
 SOLVENT CD2C12  
 NS 5  
 DS 0  
 SWH 8012.820 Hz  
 FIDRES 0.122266 Hz  
 AQ 4.0894465 sec  
 RG 49.32  
 DW 62.400 usec  
 DE 6.50 usec  
 TE 300.2 K  
 D1 1.00000000 sec  
 TD0 1

===== CHANNEL f1 =====  
 SFO1 400.1324710 MHz  
 NUC1 1H  
 P1 14.50 usec  
 PLW1 11.99499989 W

F2 - Processing parameters  
 SI 65536  
 SF 400.1300152 MHz  
 WDW EM  
 SSB 0  
 LB 0.30 Hz  
 GB 0  
 PC 1.00

Supplementary Figure 94. <sup>1</sup>H NMR spectrum for 31

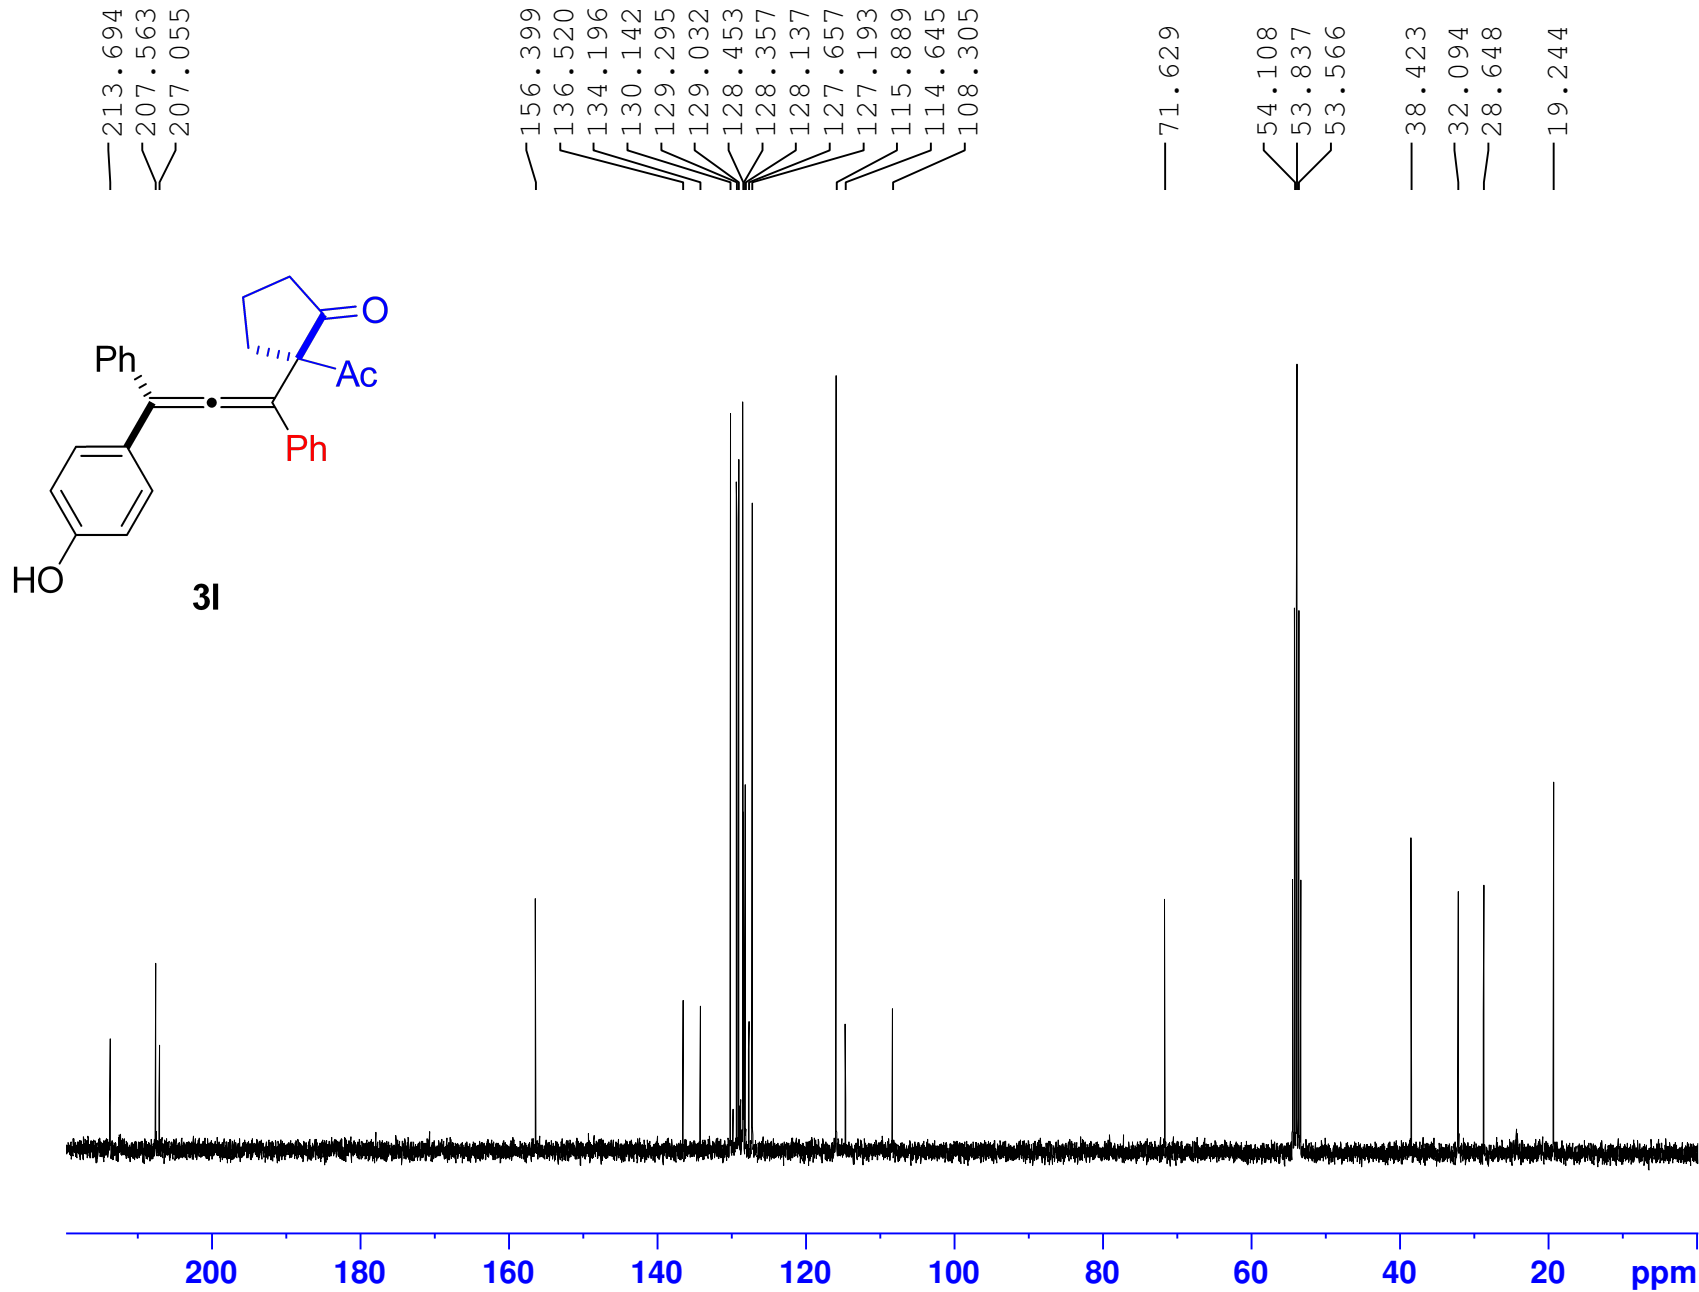

Current Data Parameters  
 NAME qdy-20112-3 C  
 EXPNO 1  
 PROCNO 2

F2 - Acquisition Parameters  
 Date\_ 20160604  
 Time 22.03  
 INSTRUM spect  
 PROBHD 5 mm PABBO BB/  
 PULPROG zgpg30  
 TD 65536  
 SOLVENT CD2C12  
 NS 72  
 DS 0  
 SWH 24038.461 Hz  
 FIDRES 0.366798 Hz  
 AQ 1.3631488 sec  
 RG 196.92  
 DW 20.800 usec  
 DE 6.50 usec  
 TE 300.7 K  
 D1 2.00000000 sec  
 D11 0.03000000 sec  
 TD0 1

==== CHANNEL f1 =====  
 SFO1 100.6228298 MHz  
 NUC1 13C  
 P1 9.70 usec  
 PLW1 46.98899841 W

==== CHANNEL f2 =====  
 SFO2 400.1316005 MHz  
 NUC2 1H  
 CPDPRG[2] waltz16  
 PCPD2 90.00 usec  
 PLW2 11.99499989 W  
 PLW12 0.34213999 W  
 PLW13 0.27713001 W

F2 - Processing parameters  
 SI 32768  
 SF 100.6127277 MHz  
 WDW EM  
 SSB 0  
 LB 1.00 Hz  
 GB 0  
 PC 1.40

Supplementary Figure 95. <sup>13</sup>C NMR spectrum for 3I

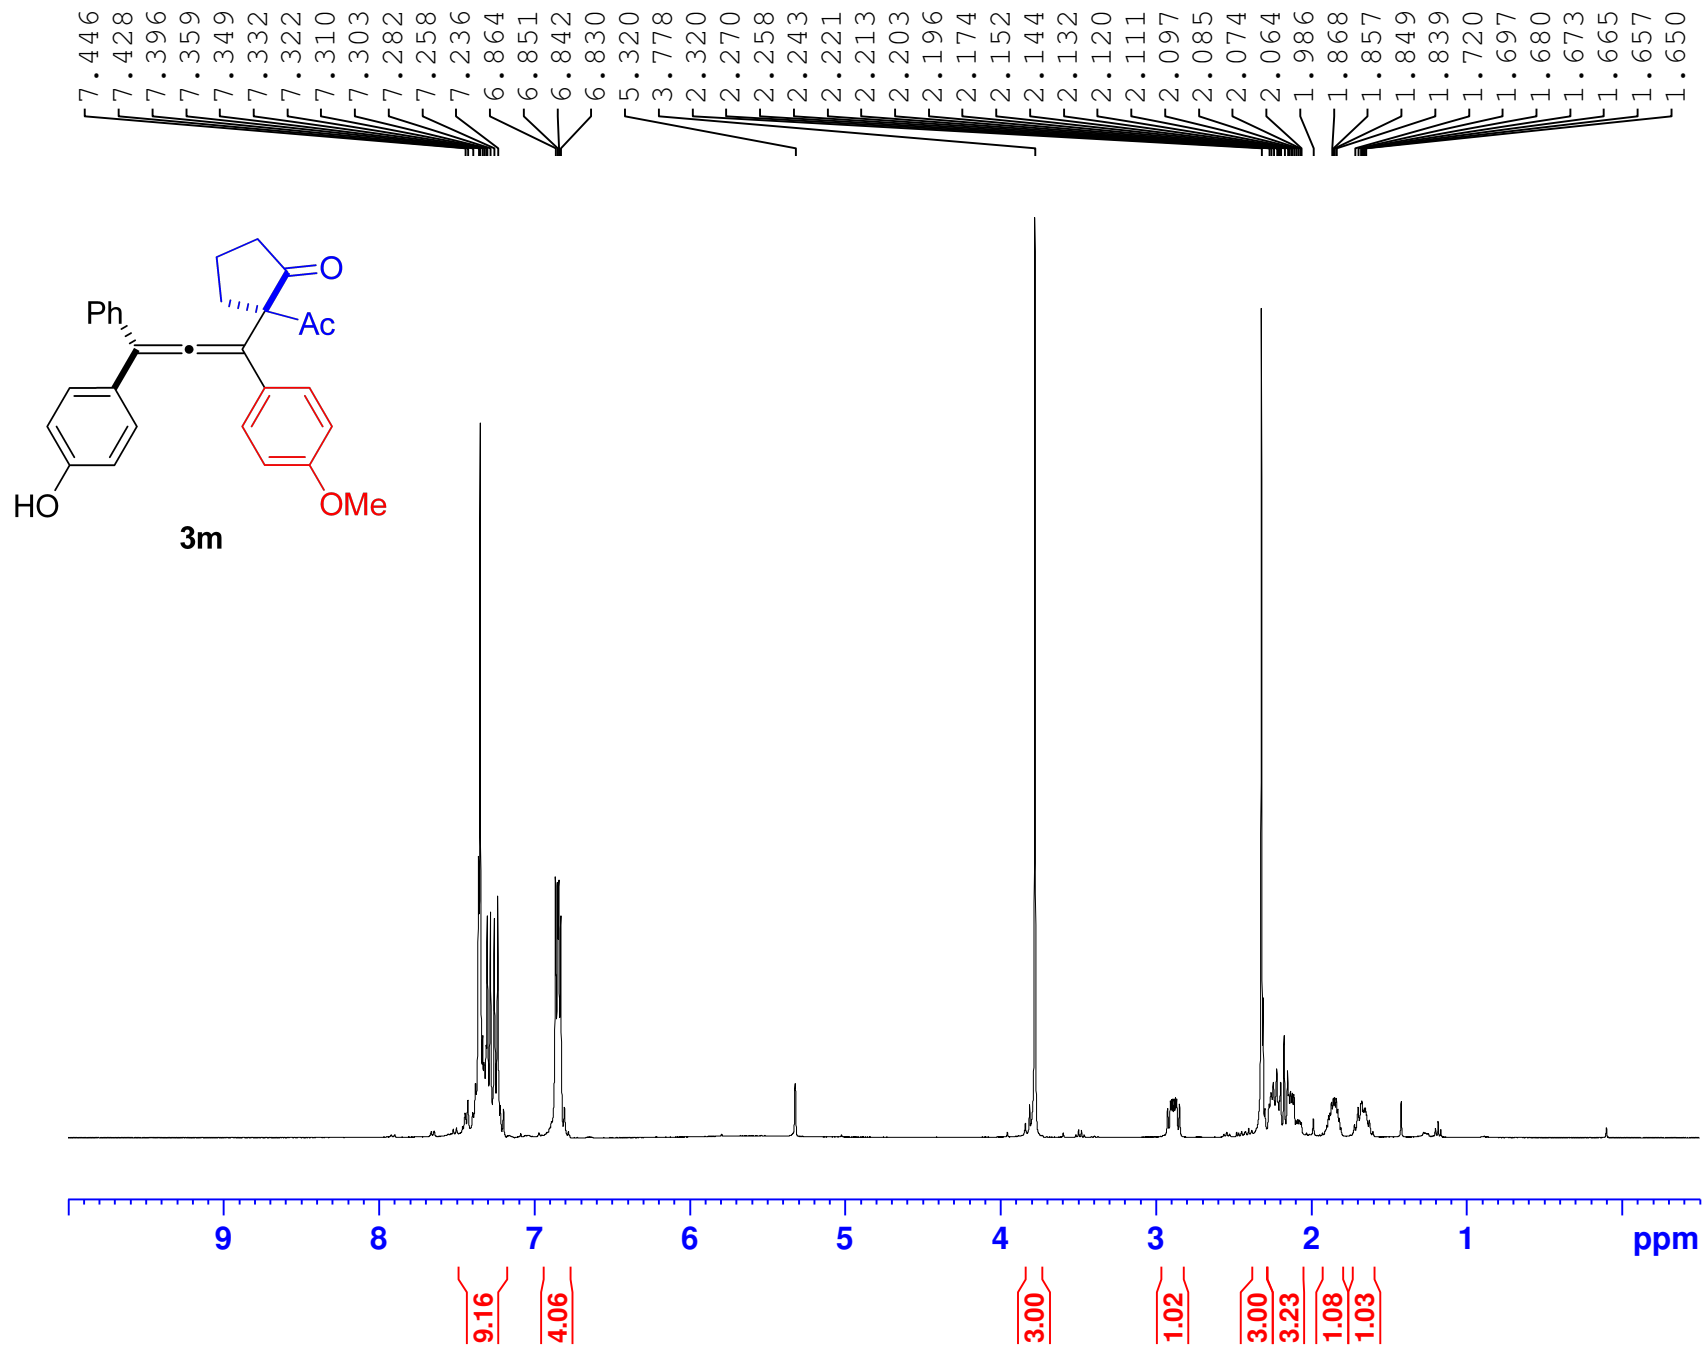

Current Data Parameters  
 NAME qdy-20012-2 H  
 EXPNO 3  
 PROCNO 1

F2 - Acquisition Parameters  
 Date\_ 20160128  
 Time 21.45  
 INSTRUM spect  
 PROBHD 5 mm PABBO BB/  
 PULPROG zg30  
 TD 65536  
 SOLVENT CD2C12  
 NS 6  
 DS 0  
 SWH 8012.820 Hz  
 FIDRES 0.122266 Hz  
 AQ 4.0894465 sec  
 RG 70.97  
 DW 62.400 usec  
 DE 6.50 usec  
 TE 296.6 K  
 D1 1.00000000 sec  
 TD0 1

==== CHANNEL f1 =====  
 SFO1 400.1324710 MHz  
 NUC1 1H  
 P1 14.50 usec  
 PLW1 11.99499989 W

F2 - Processing parameters  
 SI 65536  
 SF 400.1300149 MHz  
 WDW EM  
 SSB 0  
 LB 0.30 Hz  
 GB 0  
 PC 1.00

Supplementary Figure 96. <sup>1</sup>H NMR spectrum for 3m

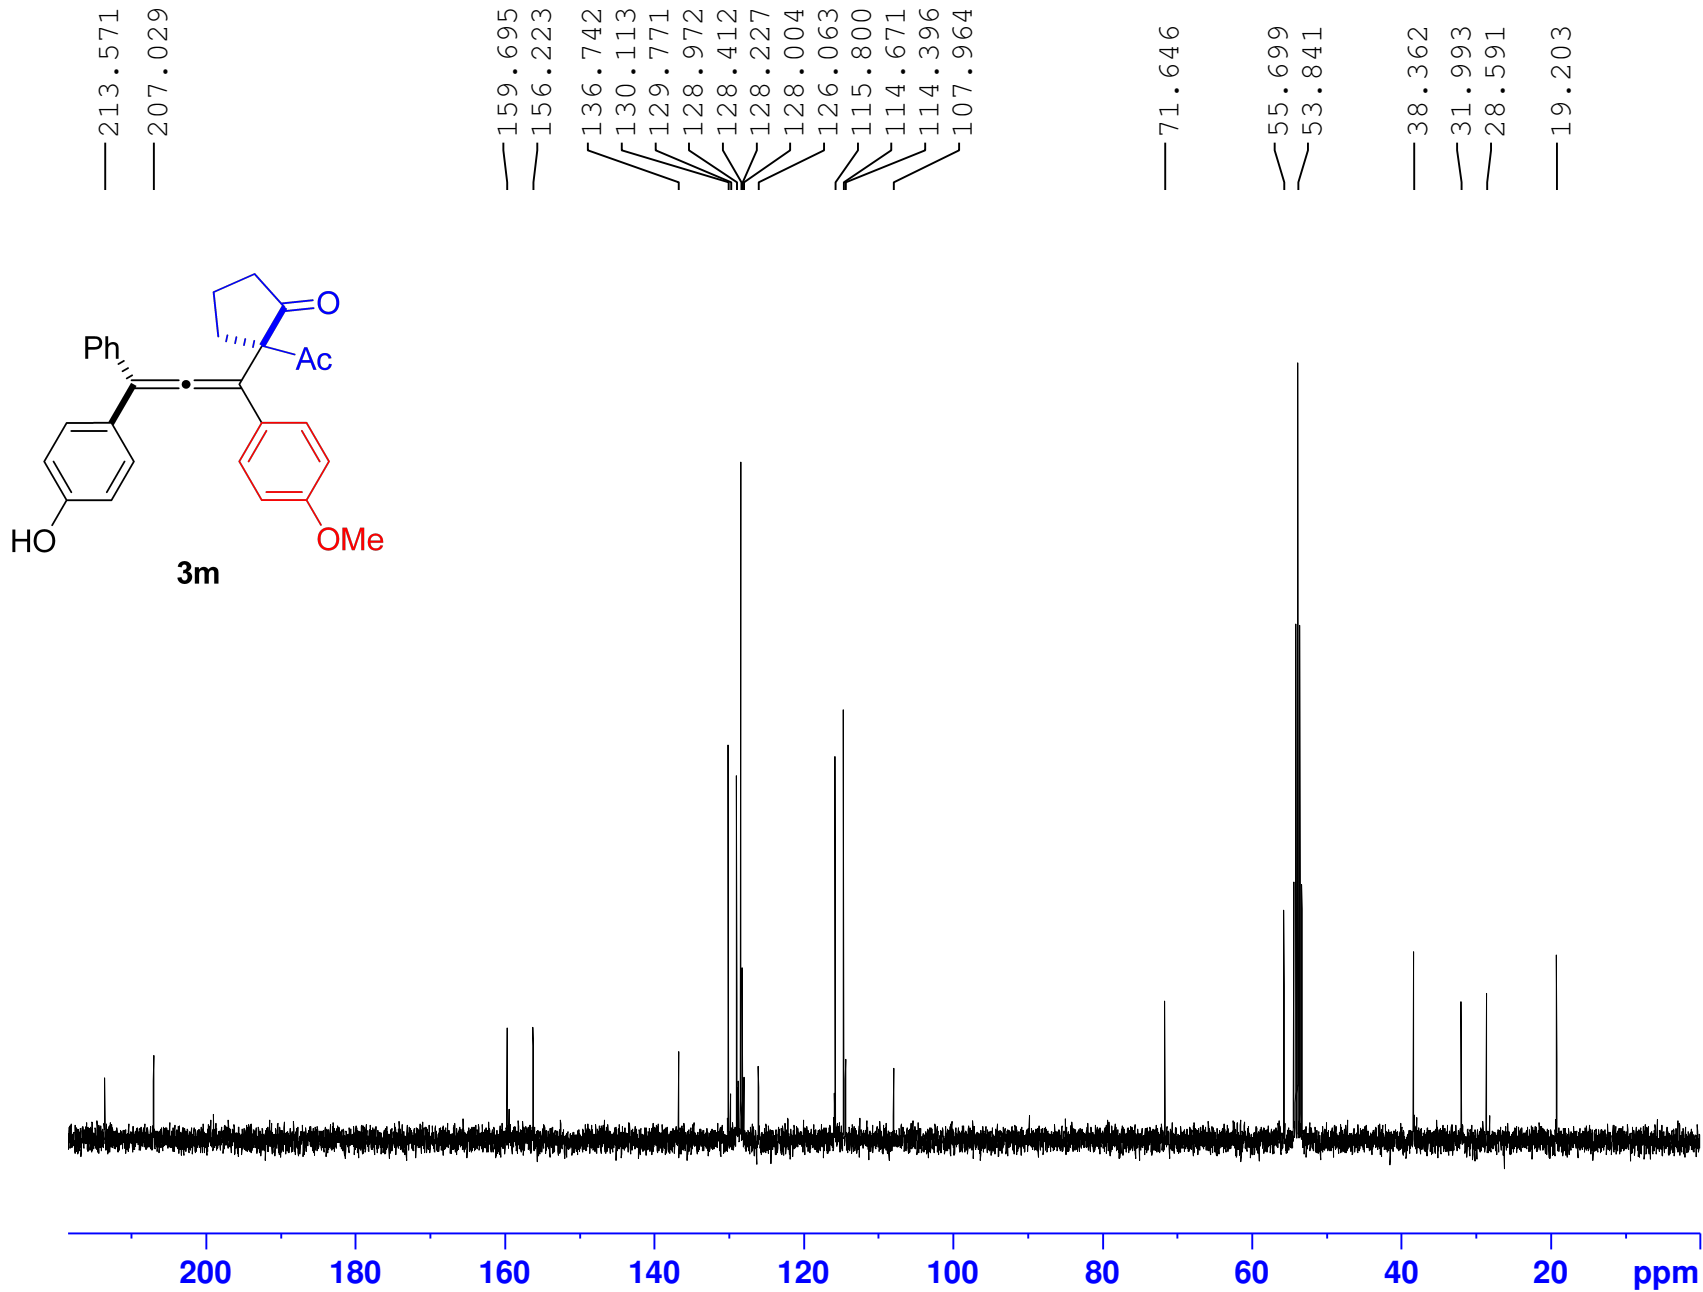

Current Data Parameters  
 NAME qdy-20012-2 C  
 EXPNO 3  
 PROCNO 1

F2 - Acquisition Parameters  
 Date\_ 20160128  
 Time 21.51  
 INSTRUM spect  
 PROBHD 5 mm PABBO BB/  
 PULPROG zgpg30  
 TD 65536  
 SOLVENT CD2C12  
 NS 111  
 DS 0  
 SWH 24038.461 Hz  
 FIDRES 0.366798 Hz  
 AQ 1.3631488 sec  
 RG 196.92  
 DW 20.800 usec  
 DE 6.50 usec  
 TE 297.5 K  
 D1 2.00000000 sec  
 D11 0.03000000 sec  
 TD0 1

==== CHANNEL f1 =====  
 SFO1 100.6228298 MHz  
 NUC1 13C  
 P1 9.70 usec  
 PLW1 46.98899841 W

==== CHANNEL f2 =====  
 SFO2 400.1316005 MHz  
 NUC2 1H  
 CPDPRG[2] waltz16  
 PCPD2 90.00 usec  
 PLW2 11.99499989 W  
 PLW12 0.34213999 W  
 PLW13 0.27713001 W

F2 - Processing parameters  
 SI 32768  
 SF 100.6127284 MHz  
 WDW EM  
 SSB 0  
 LB 1.00 Hz  
 GB 0  
 PC 1.40

Supplementary Figure 97. <sup>13</sup>C NMR spectrum for 3m

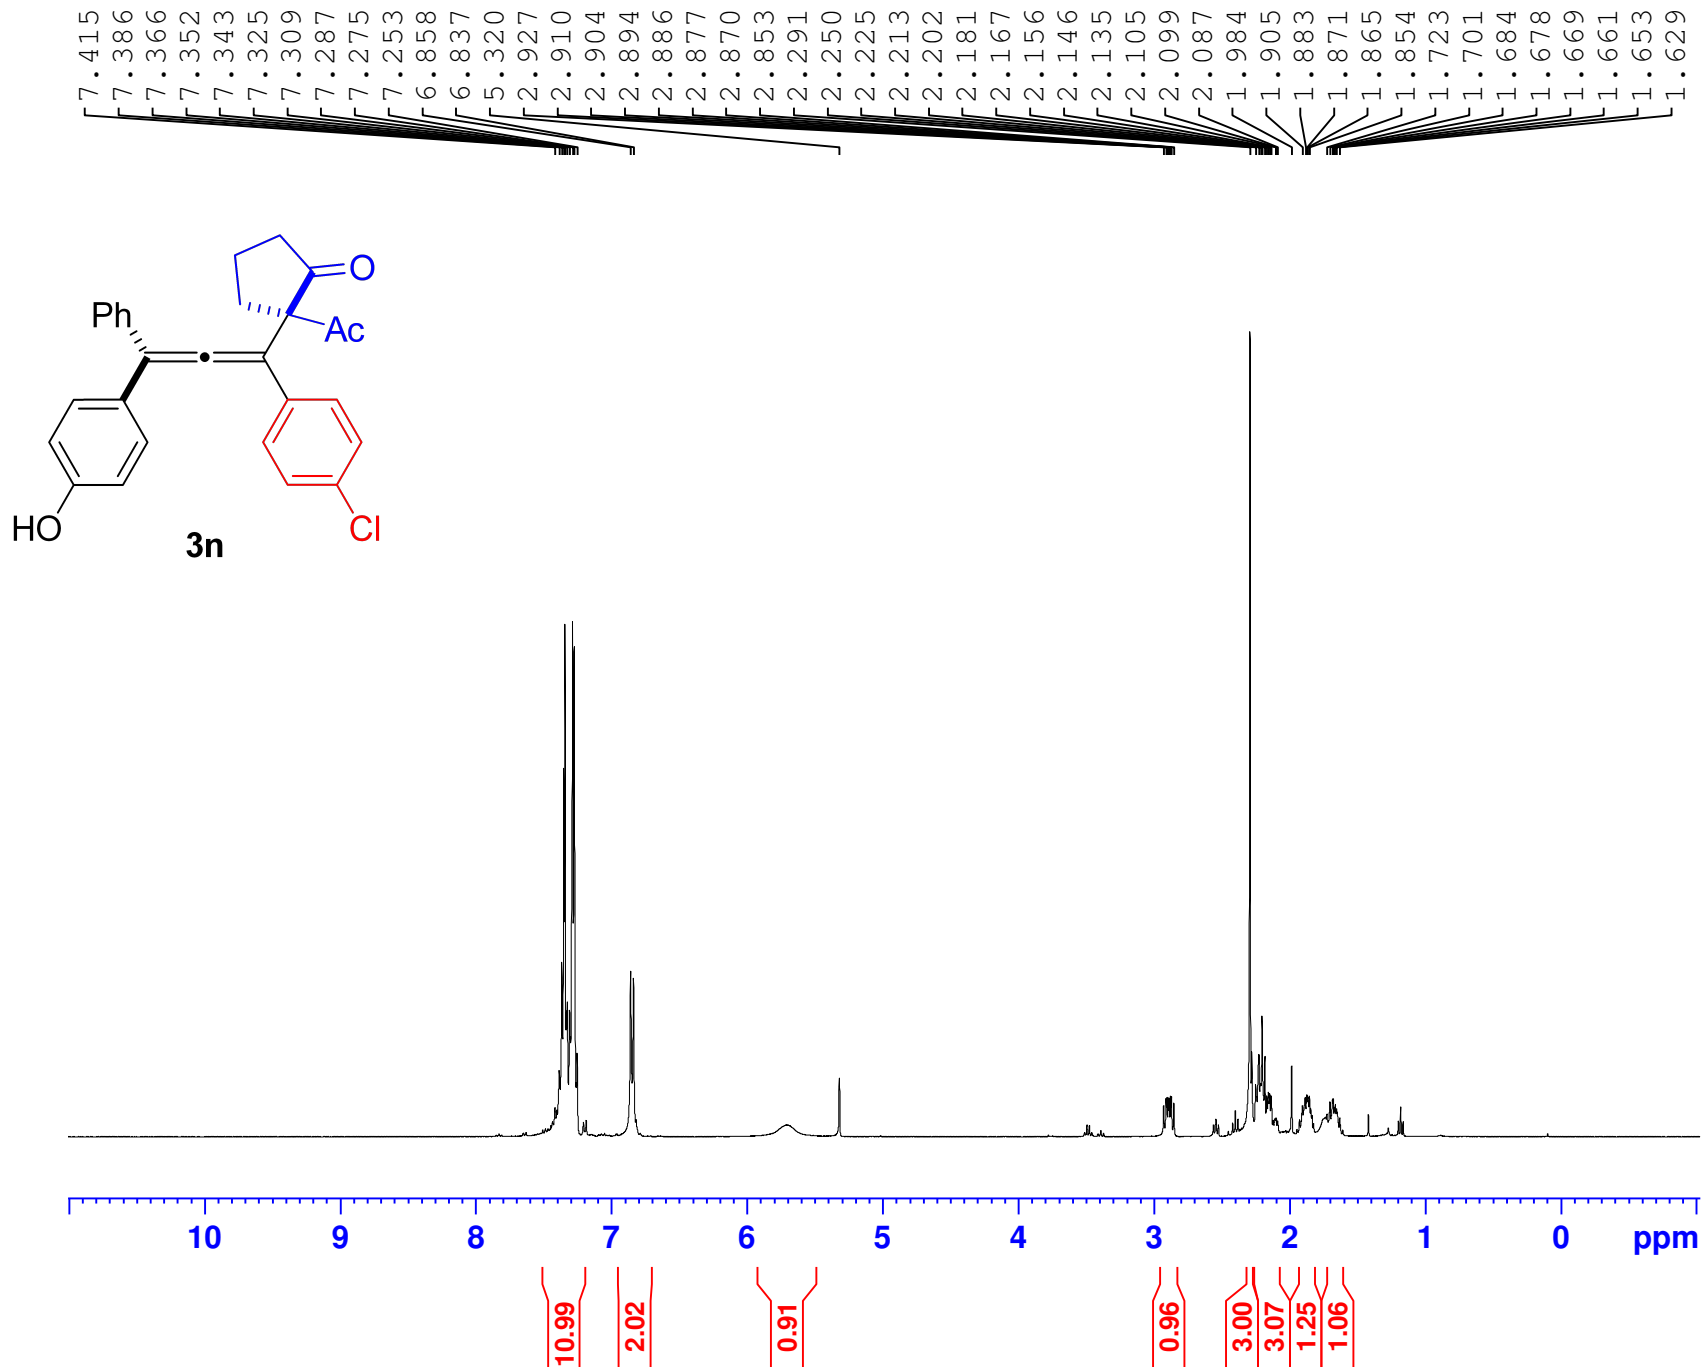

Supplementary Figure 98. <sup>1</sup>H NMR spectrum for 3n

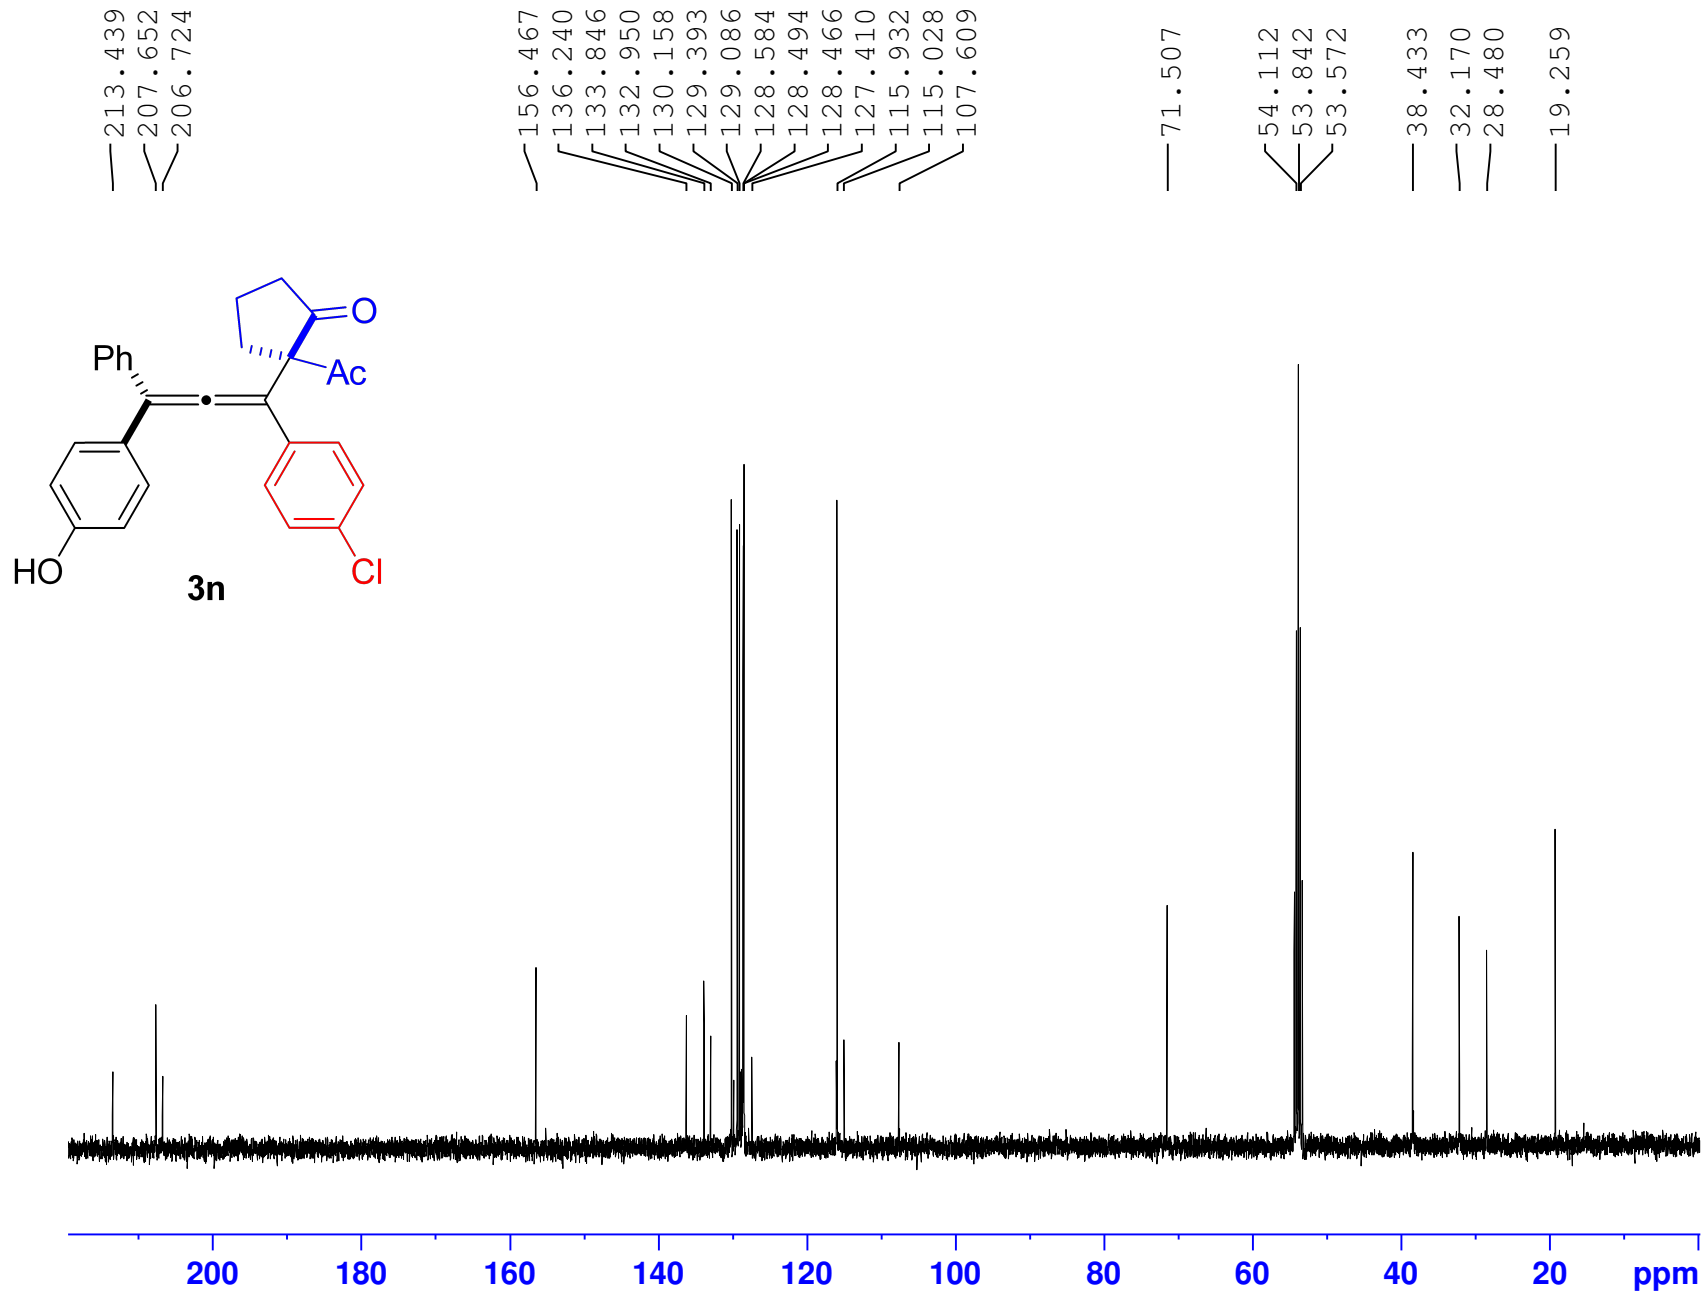

Current Data Parameters  
 NAME qdy-20036- C  
 EXPNO 1  
 PROCNO 1

F2 - Acquisition Parameters  
 Date\_ 20160627  
 Time 21.46  
 INSTRUM spect  
 PROBHD 5 mm PABBO BB/  
 PULPROG zgpg30  
 TD 65536  
 SOLVENT CD2C12  
 NS 56  
 DS 0  
 SWH 24038.461 Hz  
 FIDRES 0.366798 Hz  
 AQ 1.3631488 sec  
 RG 196.92  
 DW 20.800 usec  
 DE 6.50 usec  
 TE 300.0 K  
 D1 2.00000000 sec  
 D11 0.03000000 sec  
 TD0 1

==== CHANNEL f1 =====  
 SFO1 100.6228298 MHz  
 NUC1 13C  
 P1 9.70 usec  
 PLW1 46.98899841 W

==== CHANNEL f2 =====  
 SFO2 400.1316005 MHz  
 NUC2 1H  
 CPDPRG[2] waltz16  
 PCPD2 90.00 usec  
 PLW2 11.99499989 W  
 PLW12 0.34213999 W  
 PLW13 0.27713001 W

F2 - Processing parameters  
 SI 32768  
 SF 100.6127277 MHz  
 WDW EM  
 SSB 0  
 LB 1.00 Hz  
 GB 0  
 PC 1.40

Supplementary Figure 99. <sup>13</sup>C NMR spectrum for 3n



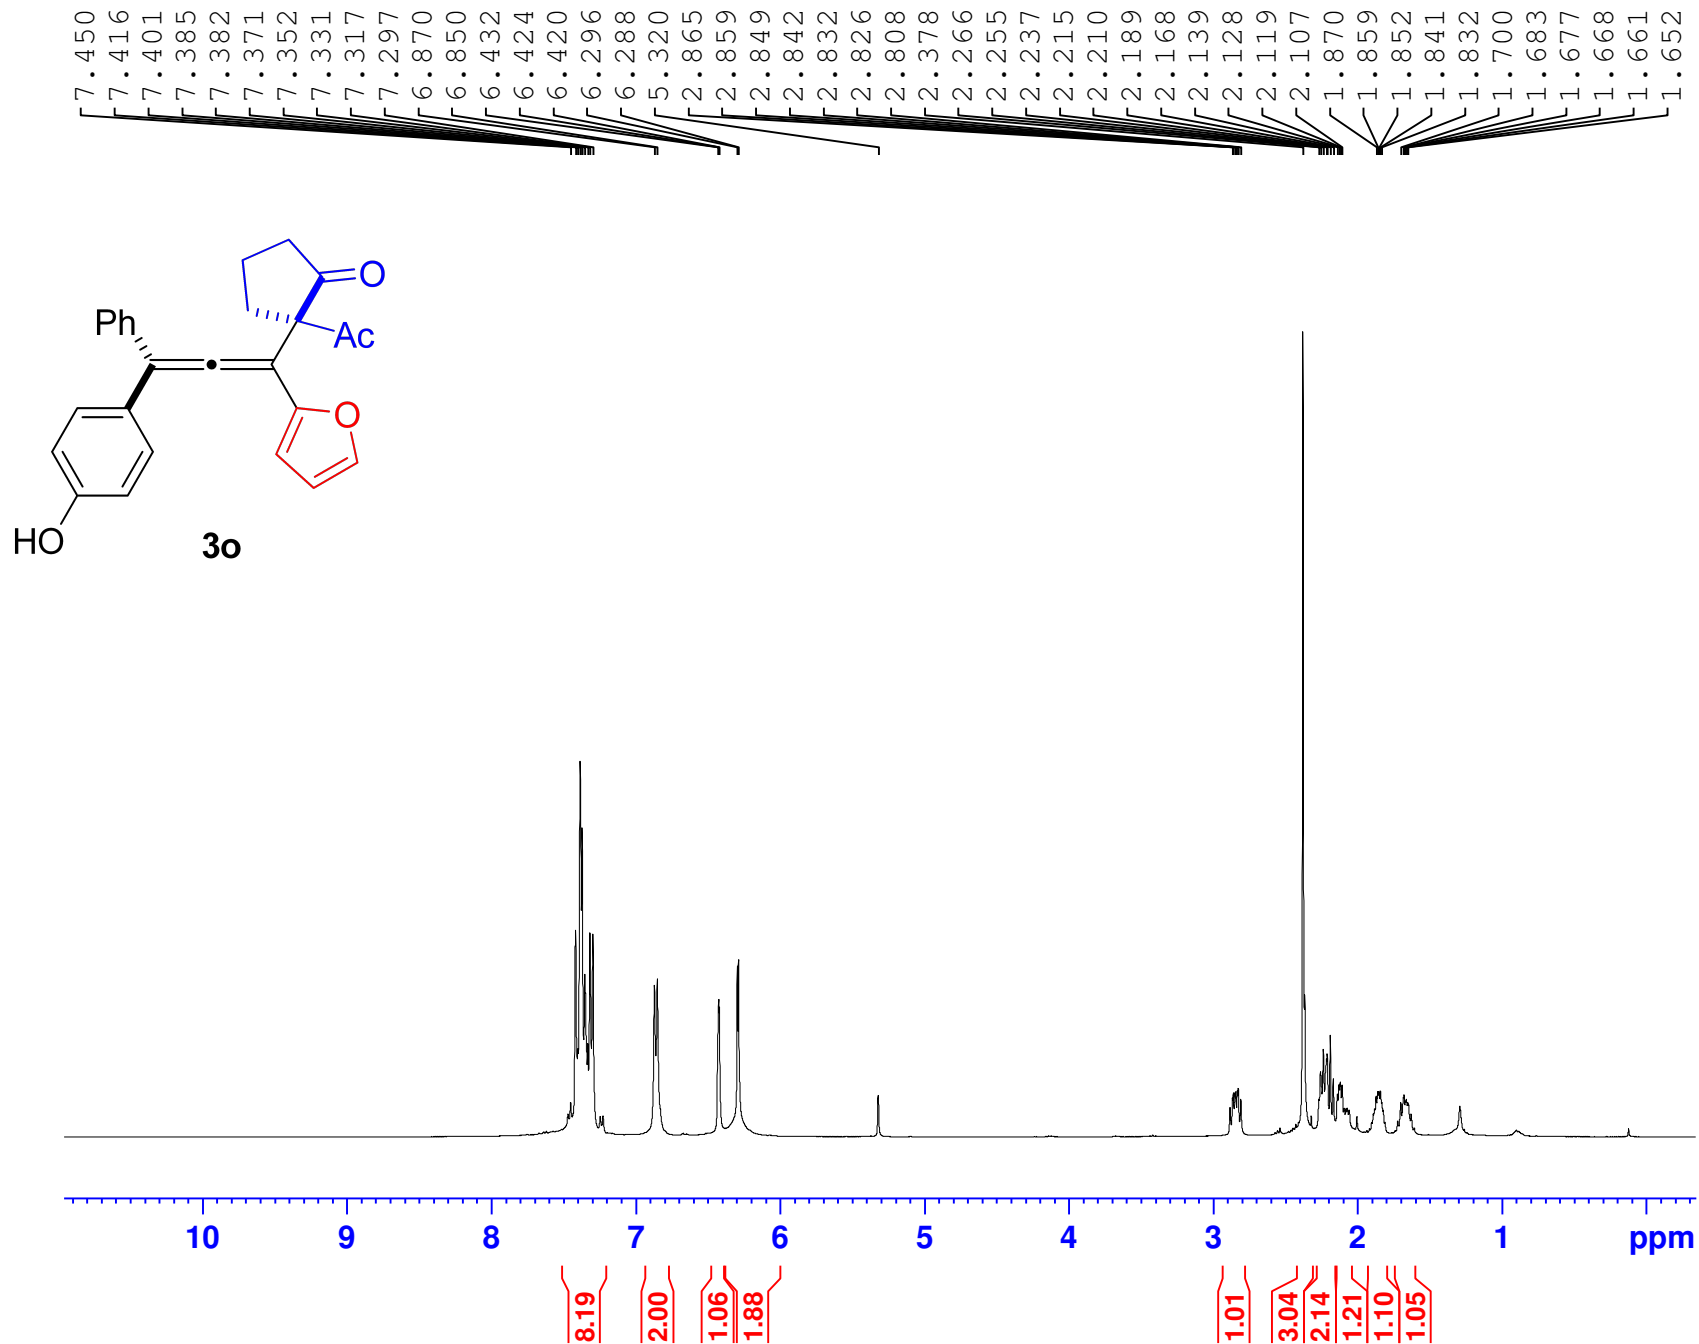

Current Data Parameters  
 NAME qdy-200881-1 H  
 EXPNO 1  
 PROCNO 1

F2 - Acquisition Parameters  
 Date\_ 20160318  
 Time 21.33  
 INSTRUM spect  
 PROBHD 5 mm PABBO BB/  
 PULPROG zg30  
 TD 65536  
 SOLVENT CD2C12  
 NS 10  
 DS 0  
 SWH 8012.820 Hz  
 FIDRES 0.122266 Hz  
 AQ 4.0894465 sec  
 RG 34.77  
 DW 62.400 usec  
 DE 6.50 usec  
 TE 296.9 K  
 D1 1.00000000 sec  
 TD0 1

==== CHANNEL f1 =====  
 SFO1 400.1324710 MHz  
 NUC1 1H  
 P1 14.50 usec  
 PLW1 11.99499989 W

F2 - Processing parameters  
 SI 65536  
 SF 400.1300149 MHz  
 WDW EM  
 SSB 0  
 LB 0.30 Hz  
 GB 0  
 PC 1.00

Supplementary Figure 100. <sup>1</sup>H NMR spectrum for 3o

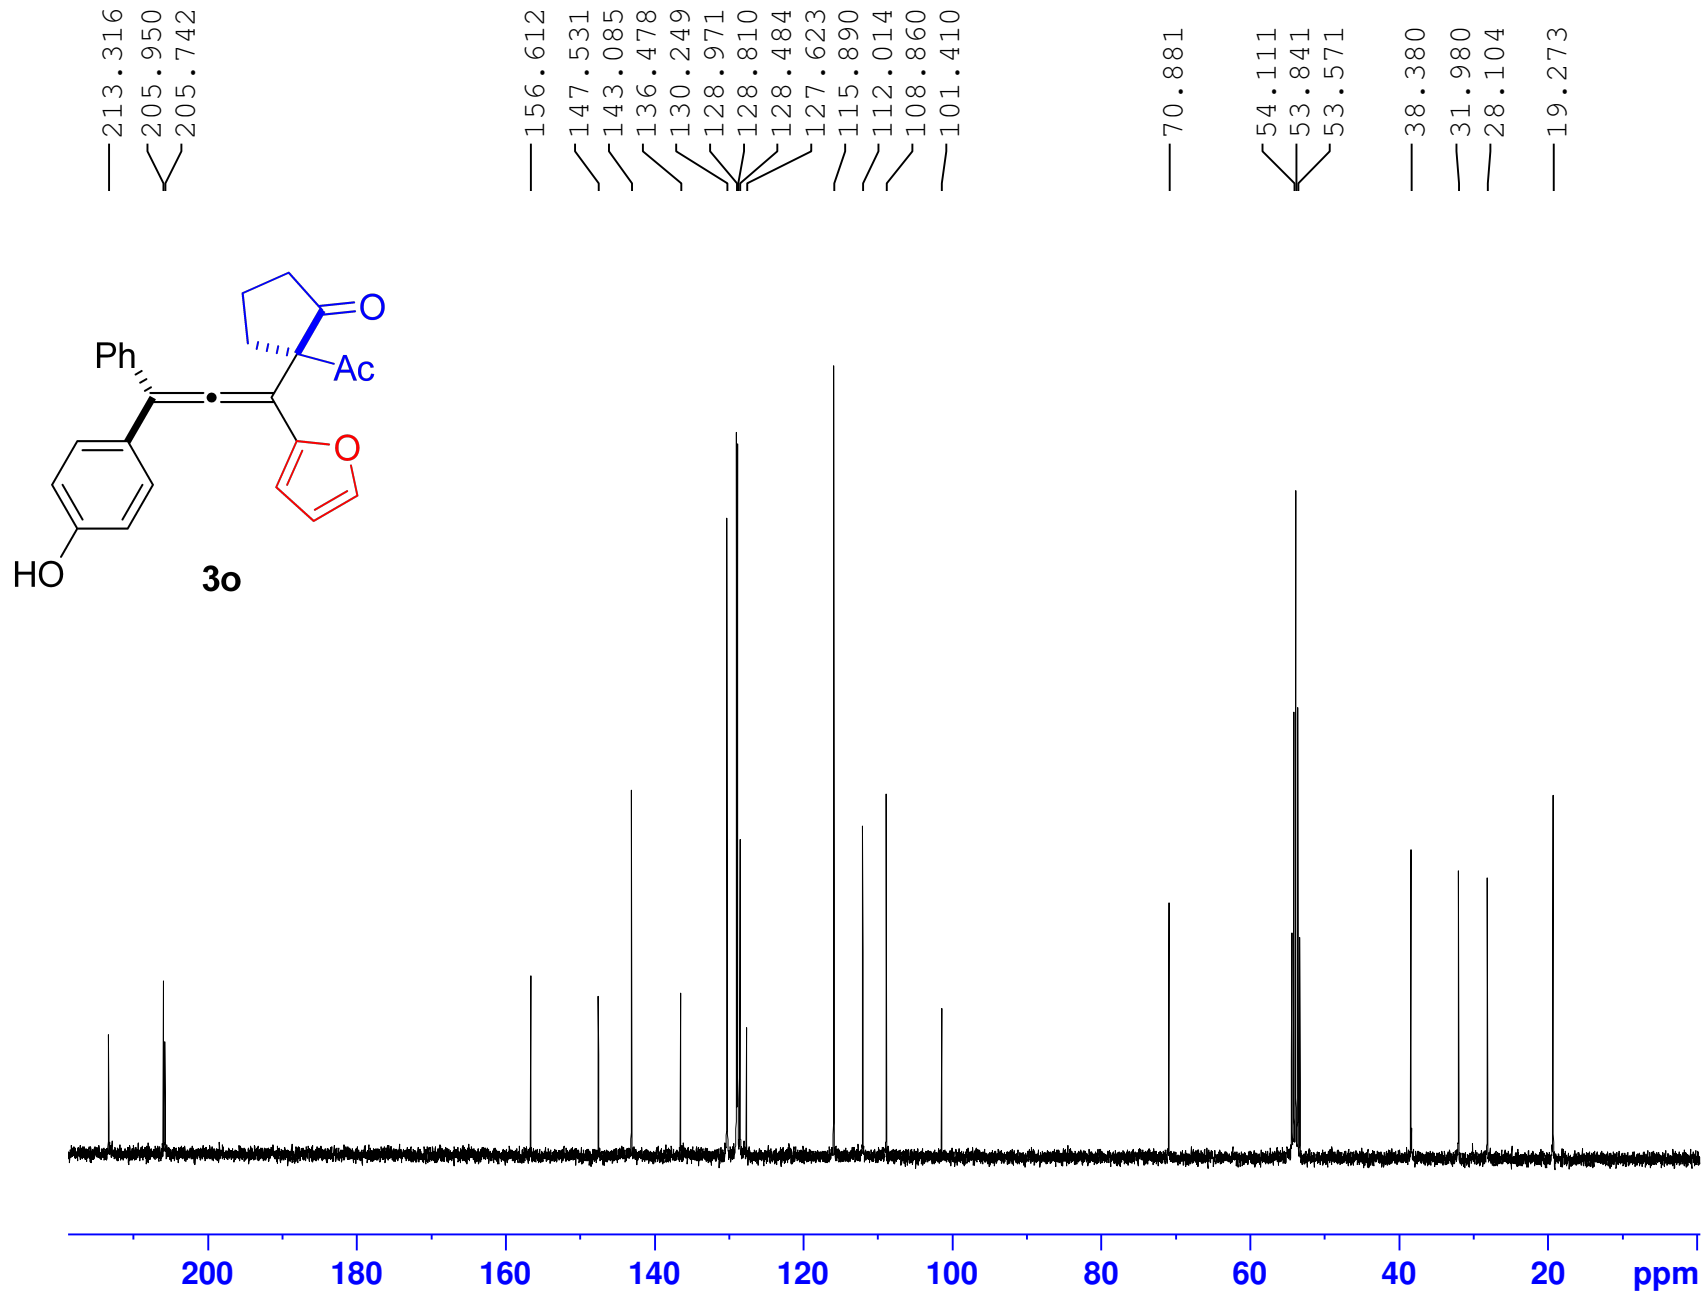

Current Data Parameters  
 NAME qdy-200881-1 C  
 EXPNO 1  
 PROCNO 1

F2 - Acquisition Parameters  
 Date\_ 20160318  
 Time 21.37  
 INSTRUM spect  
 PROBHD 5 mm PABBO BB/  
 PULPROG zgpg30  
 TD 65536  
 SOLVENT CD2C12  
 NS 115  
 DS 0  
 SWH 24038.461 Hz  
 FIDRES 0.366798 Hz  
 AQ 1.3631488 sec  
 RG 196.92  
 DW 20.800 usec  
 DE 6.50 usec  
 TE 297.8 K  
 D1 2.00000000 sec  
 D11 0.03000000 sec  
 TD0 1

==== CHANNEL f1 =====  
 SFO1 100.6228298 MHz  
 NUC1 13C  
 P1 9.70 usec  
 PLW1 46.98899841 W

==== CHANNEL f2 =====  
 SFO2 400.1316005 MHz  
 NUC2 1H  
 CPDPRG[2] waltz16  
 PCPD2 90.00 usec  
 PLW2 11.99499989 W  
 PLW12 0.34213999 W  
 PLW13 0.27713001 W

F2 - Processing parameters  
 SI 32768  
 SF 100.6127299 MHz  
 WDW EM  
 SSB 0  
 LB 1.00 Hz  
 GB 0  
 PC 1.40

**Supplementary Figure 101. <sup>13</sup>C NMR spectrum for 3o**

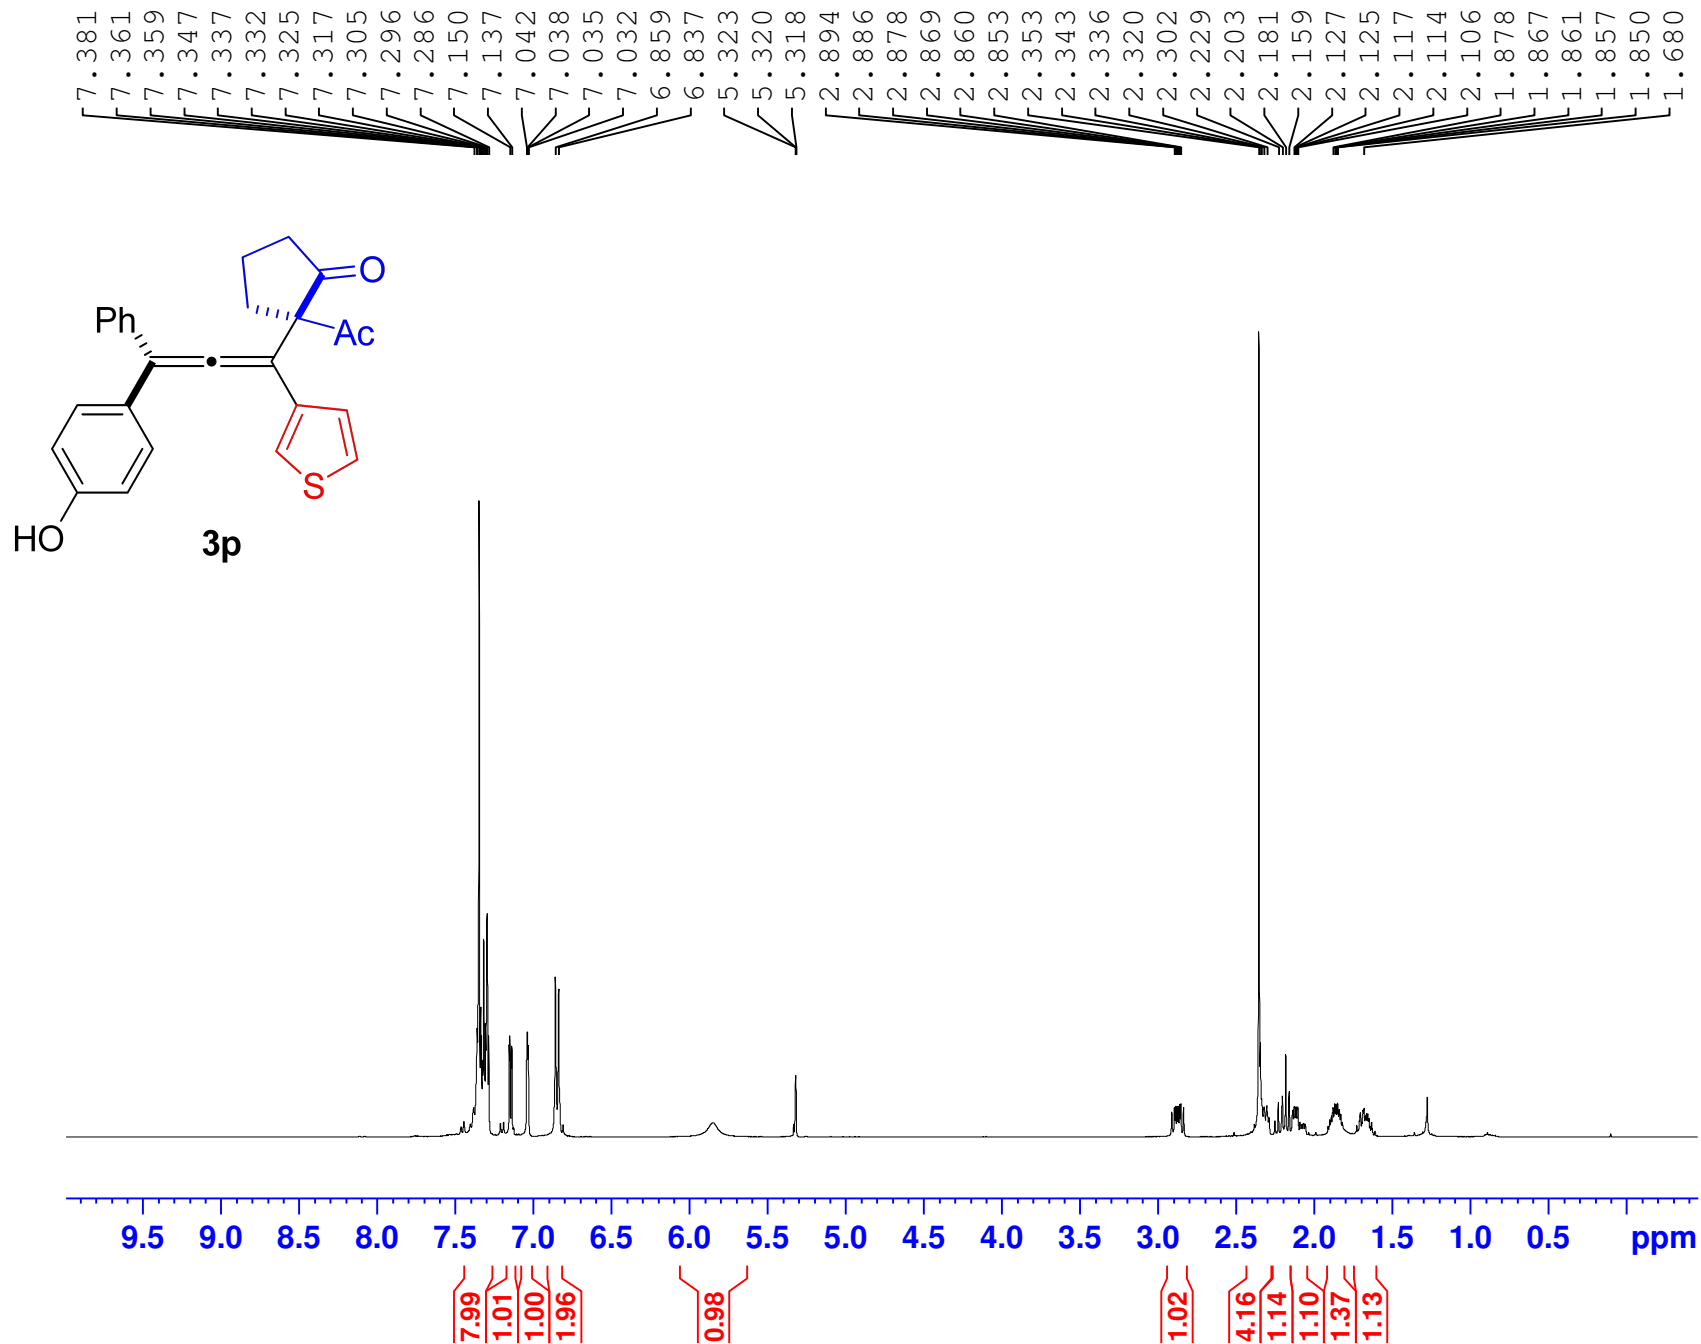

Current Data Parameters  
 NAME qdy-20093-1 H  
 EXPNO 1  
 PROCNO 1

F2 - Acquisition Parameters  
 Date\_ 20160324  
 Time 19.25  
 INSTRUM spect  
 PROBHD 5 mm PABBO BB/  
 PULPROG zg30  
 TD 65536  
 SOLVENT CD2C12  
 NS 6  
 DS 0  
 SWH 8012.820 Hz  
 FIDRES 0.122266 Hz  
 AQ 4.0894465 sec  
 RG 54.81  
 DW 62.400 usec  
 DE 6.50 usec  
 TE 296.3 K  
 D1 1.00000000 sec  
 TD0 1

==== CHANNEL f1 =====  
 SFO1 400.1324710 MHz  
 NUC1 1H  
 P1 14.50 usec  
 PLW1 11.99499989 W

F2 - Processing parameters  
 SI 65536  
 SF 400.1300152 MHz  
 WDW EM  
 SSB 0  
 LB 0.30 Hz  
 GB 0  
 PC 1.00

Supplementary Figure 102. <sup>1</sup>H NMR spectrum for 3p

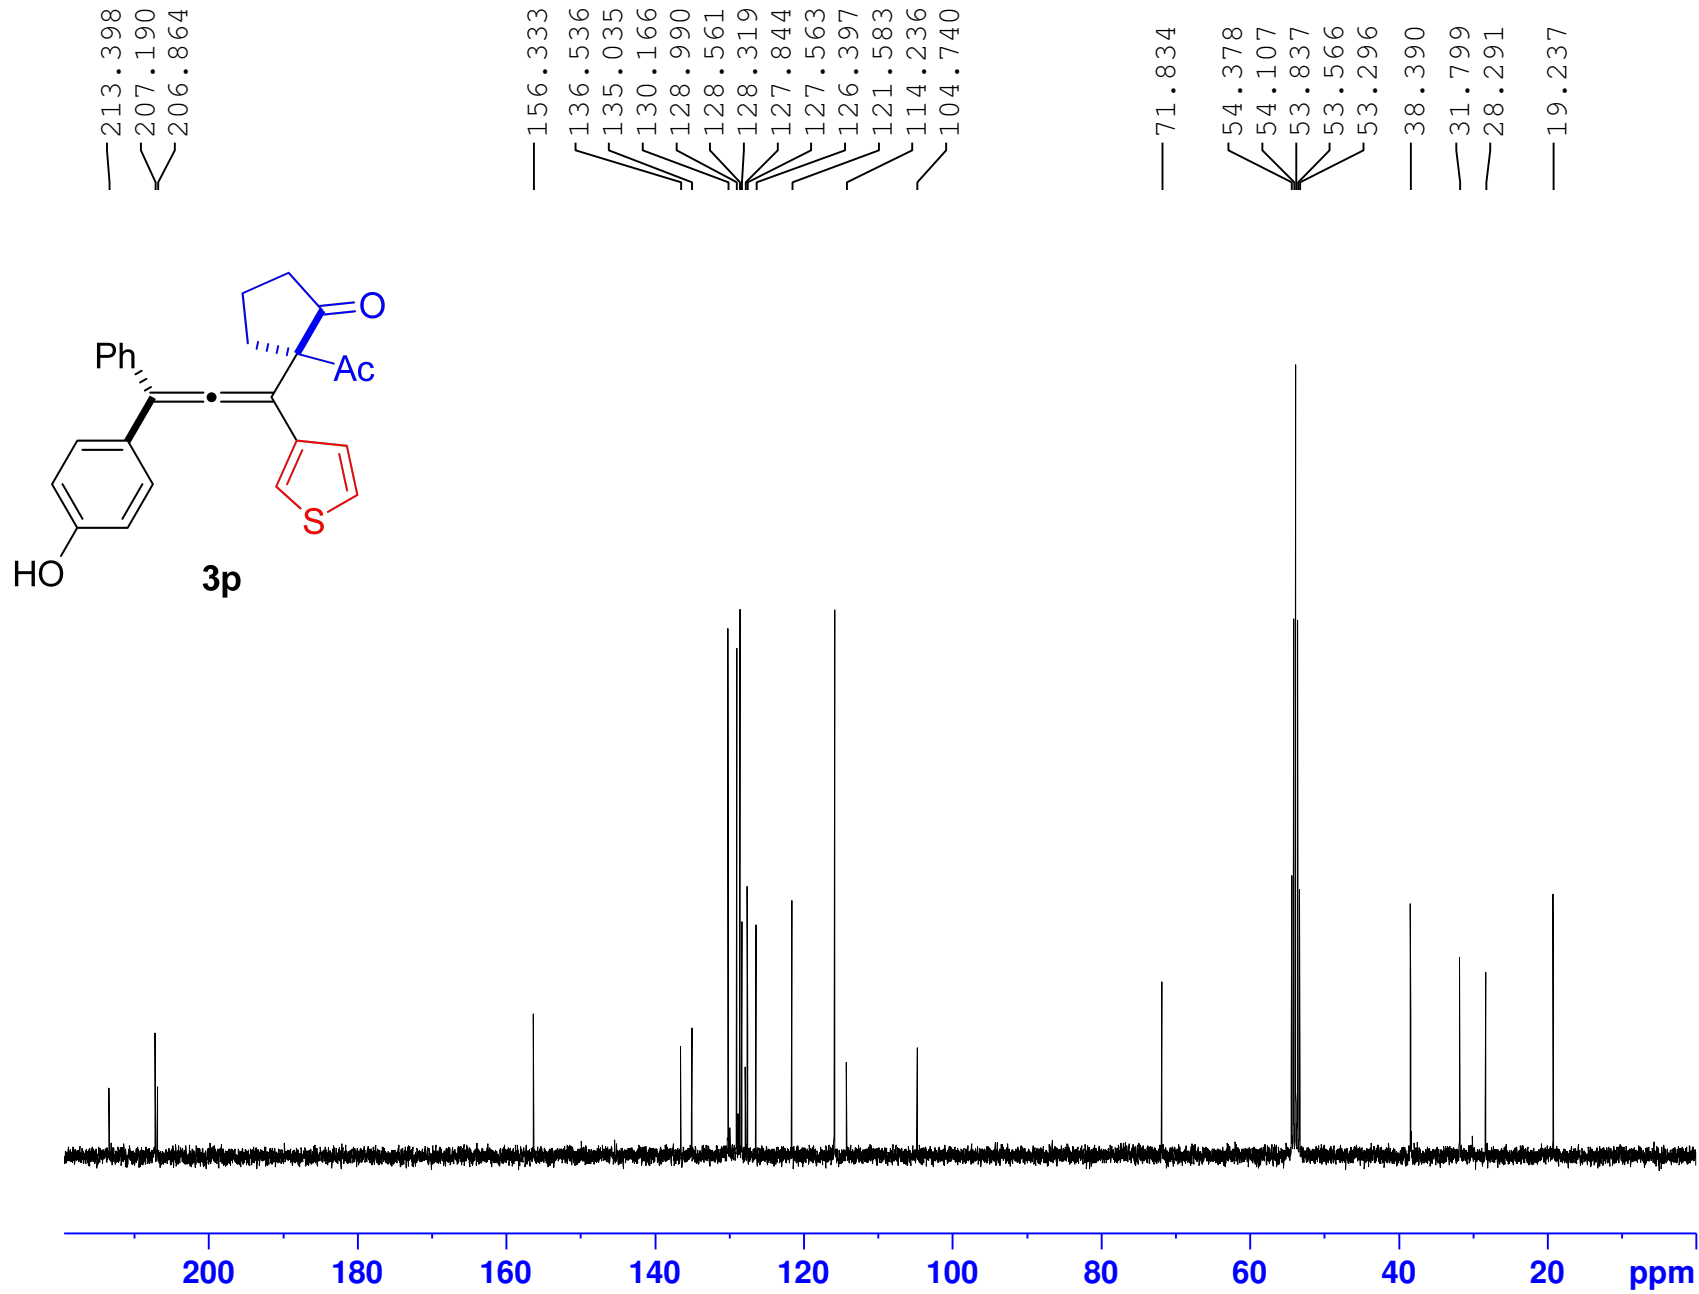

Current Data Parameters  
 NAME qdy-20093-1 C  
 EXPNO 1  
 PROCNO 1

F2 - Acquisition Parameters  
 Date\_ 20160324  
 Time 19.30  
 INSTRUM spect  
 PROBHD 5 mm PABBO BB/  
 PULPROG zgpg30  
 TD 65536  
 SOLVENT CD2C12  
 NS 102  
 DS 0  
 SWH 24038.461 Hz  
 FIDRES 0.366798 Hz  
 AQ 1.3631488 sec  
 RG 196.92  
 DW 20.800 usec  
 DE 6.50 usec  
 TE 297.4 K  
 D1 2.00000000 sec  
 D11 0.03000000 sec  
 TD0 1

==== CHANNEL f1 =====  
 SFO1 100.6228298 MHz  
 NUC1 13C  
 P1 9.70 usec  
 PLW1 46.98899841 W

==== CHANNEL f2 =====  
 SFO2 400.1316005 MHz  
 NUC2 1H  
 CPDPRG[2] waltz16  
 PCPD2 90.00 usec  
 PLW2 11.99499989 W  
 PLW12 0.34213999 W  
 PLW13 0.27713001 W

F2 - Processing parameters  
 SI 32768  
 SF 100.6127292 MHz  
 WDW EM  
 SSB 0  
 LB 1.00 Hz  
 GB 0  
 PC 1.40

Supplementary Figure 103. <sup>13</sup>C NMR spectrum for 3p

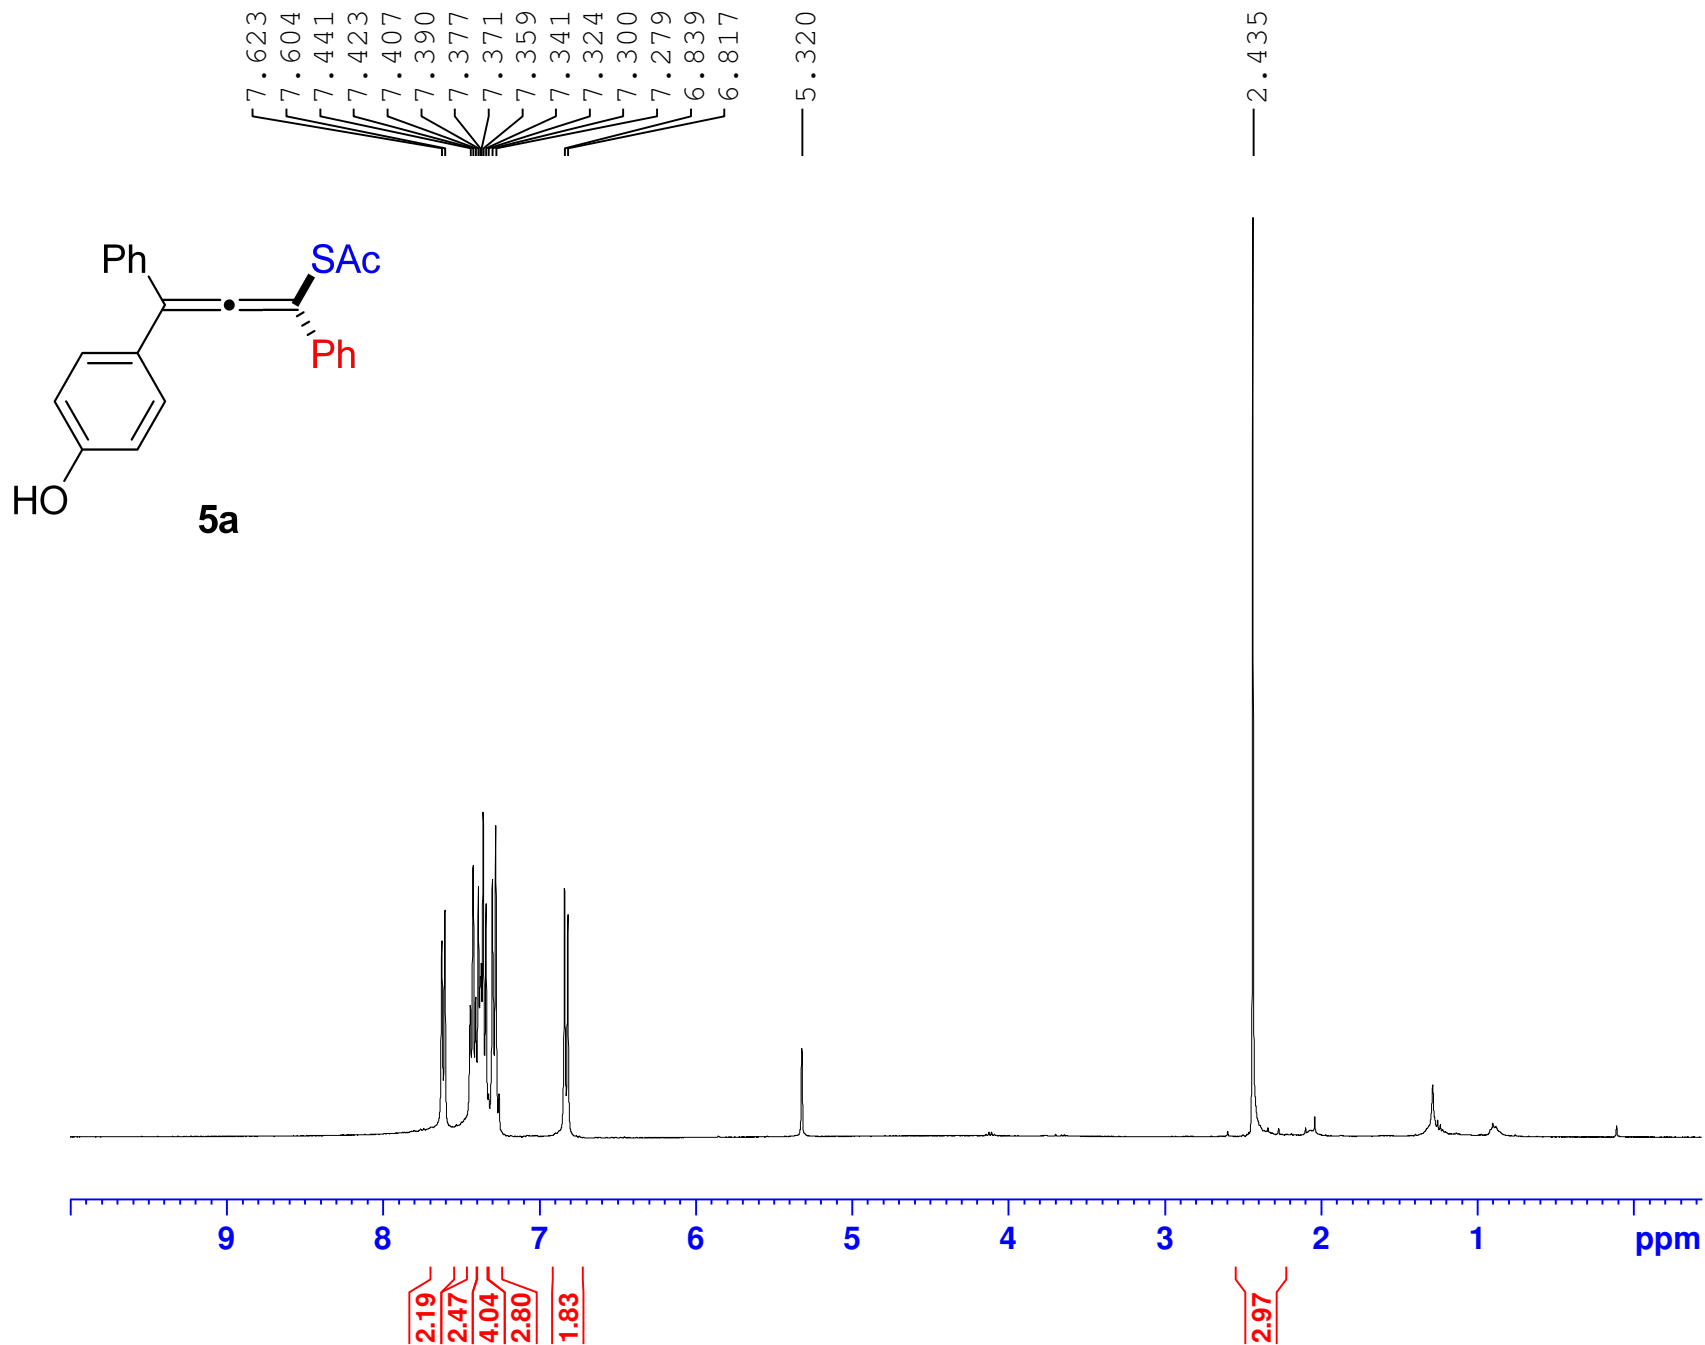

Current Data Parameters  
 NAME qdy-20087-2 H  
 EXPNO 2  
 PROCNO 1

F2 - Acquisition Parameters  
 Date\_ 20160318  
 Time 21.57  
 INSTRUM spect  
 PROBHD 5 mm PABBO BB/  
 PULPROG zg30  
 TD 65536  
 SOLVENT CD2C12  
 NS 7  
 DS 0  
 SWH 8012.820 Hz  
 FIDRES 0.122266 Hz  
 AQ 4.0894465 sec  
 RG 82.92  
 DW 62.400 usec  
 DE 6.50 usec  
 TE 297.5 K  
 D1 1.00000000 sec  
 TD0 1

===== CHANNEL f1 =====  
 SFO1 400.1324710 MHz  
 NUC1 1H  
 P1 14.50 usec  
 PLW1 11.99499989 W

F2 - Processing parameters  
 SI 65536  
 SF 400.1300151 MHz  
 WDW EM  
 SSB 0  
 LB 0.30 Hz  
 GB 0  
 PC 1.00

Supplementary Figure 104.  $^1\text{H NMR}$  spectrum for **5a**

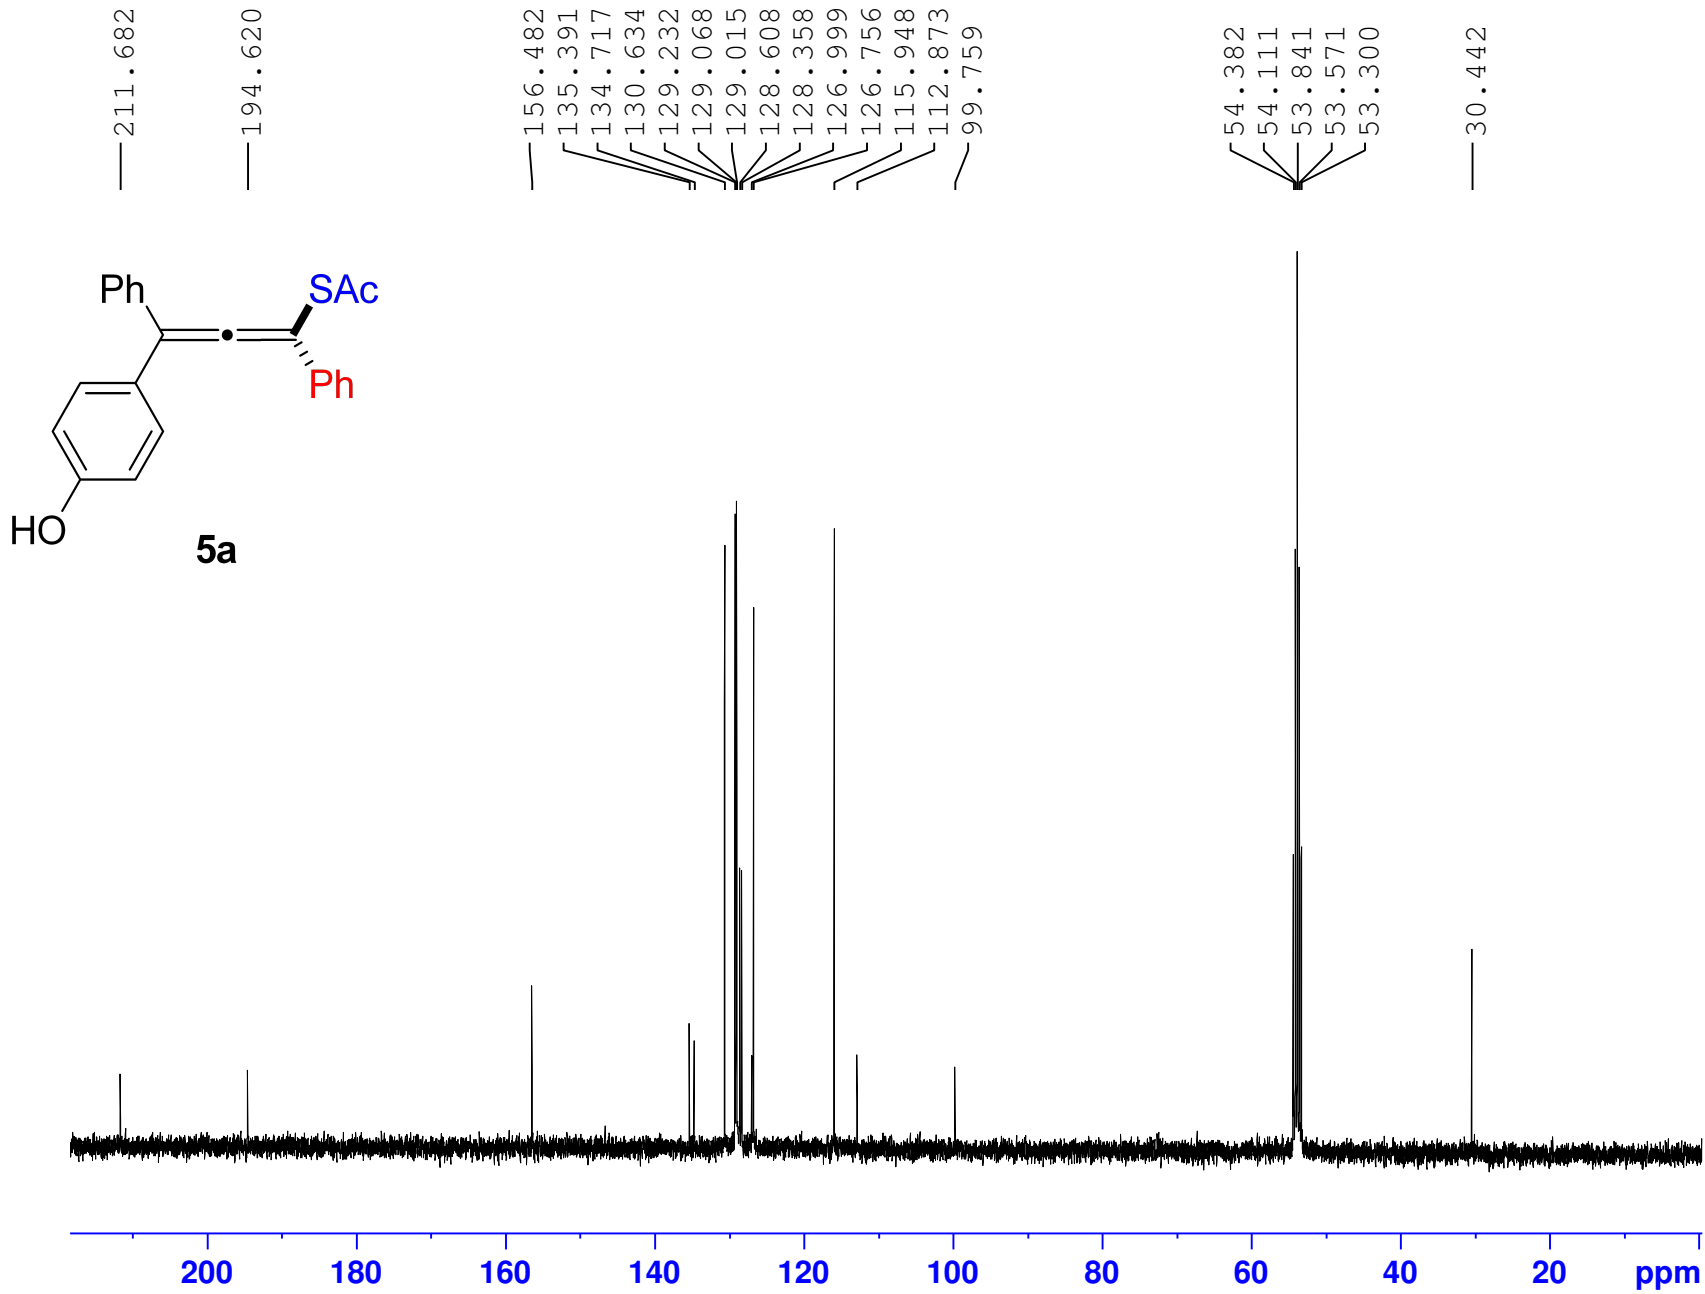

Current Data Parameters  
 NAME qdy-20087-2 C  
 EXPNO 2  
 PROCNO 1

F2 - Acquisition Parameters  
 Date\_ 20160318  
 Time 22.04  
 INSTRUM spect  
 PROBHD 5 mm PABBO BB/  
 PULPROG zgpg30  
 TD 65536  
 SOLVENT CD2C12  
 NS 168  
 DS 0  
 SWH 24038.461 Hz  
 FIDRES 0.366798 Hz  
 AQ 1.3631488 sec  
 RG 196.92  
 DW 20.800 usec  
 DE 6.50 usec  
 TE 299.2 K  
 D1 2.00000000 sec  
 D11 0.03000000 sec  
 TD0 1

==== CHANNEL f1 =====  
 SFO1 100.6228298 MHz  
 NUC1 13C  
 P1 9.70 usec  
 PLW1 46.98899841 W

==== CHANNEL f2 =====  
 SFO2 400.1316005 MHz  
 NUC2 1H  
 CPDPRG[2] waltz16  
 PCPD2 90.00 usec  
 PLW2 11.99499989 W  
 PLW12 0.34213999 W  
 PLW13 0.27713001 W

F2 - Processing parameters  
 SI 32768  
 SF 100.6127277 MHz  
 WDW EM  
 SSB 0  
 LB 1.00 Hz  
 GB 0  
 PC 1.40

Supplementary Figure 105. <sup>13</sup>C NMR spectrum for 5a

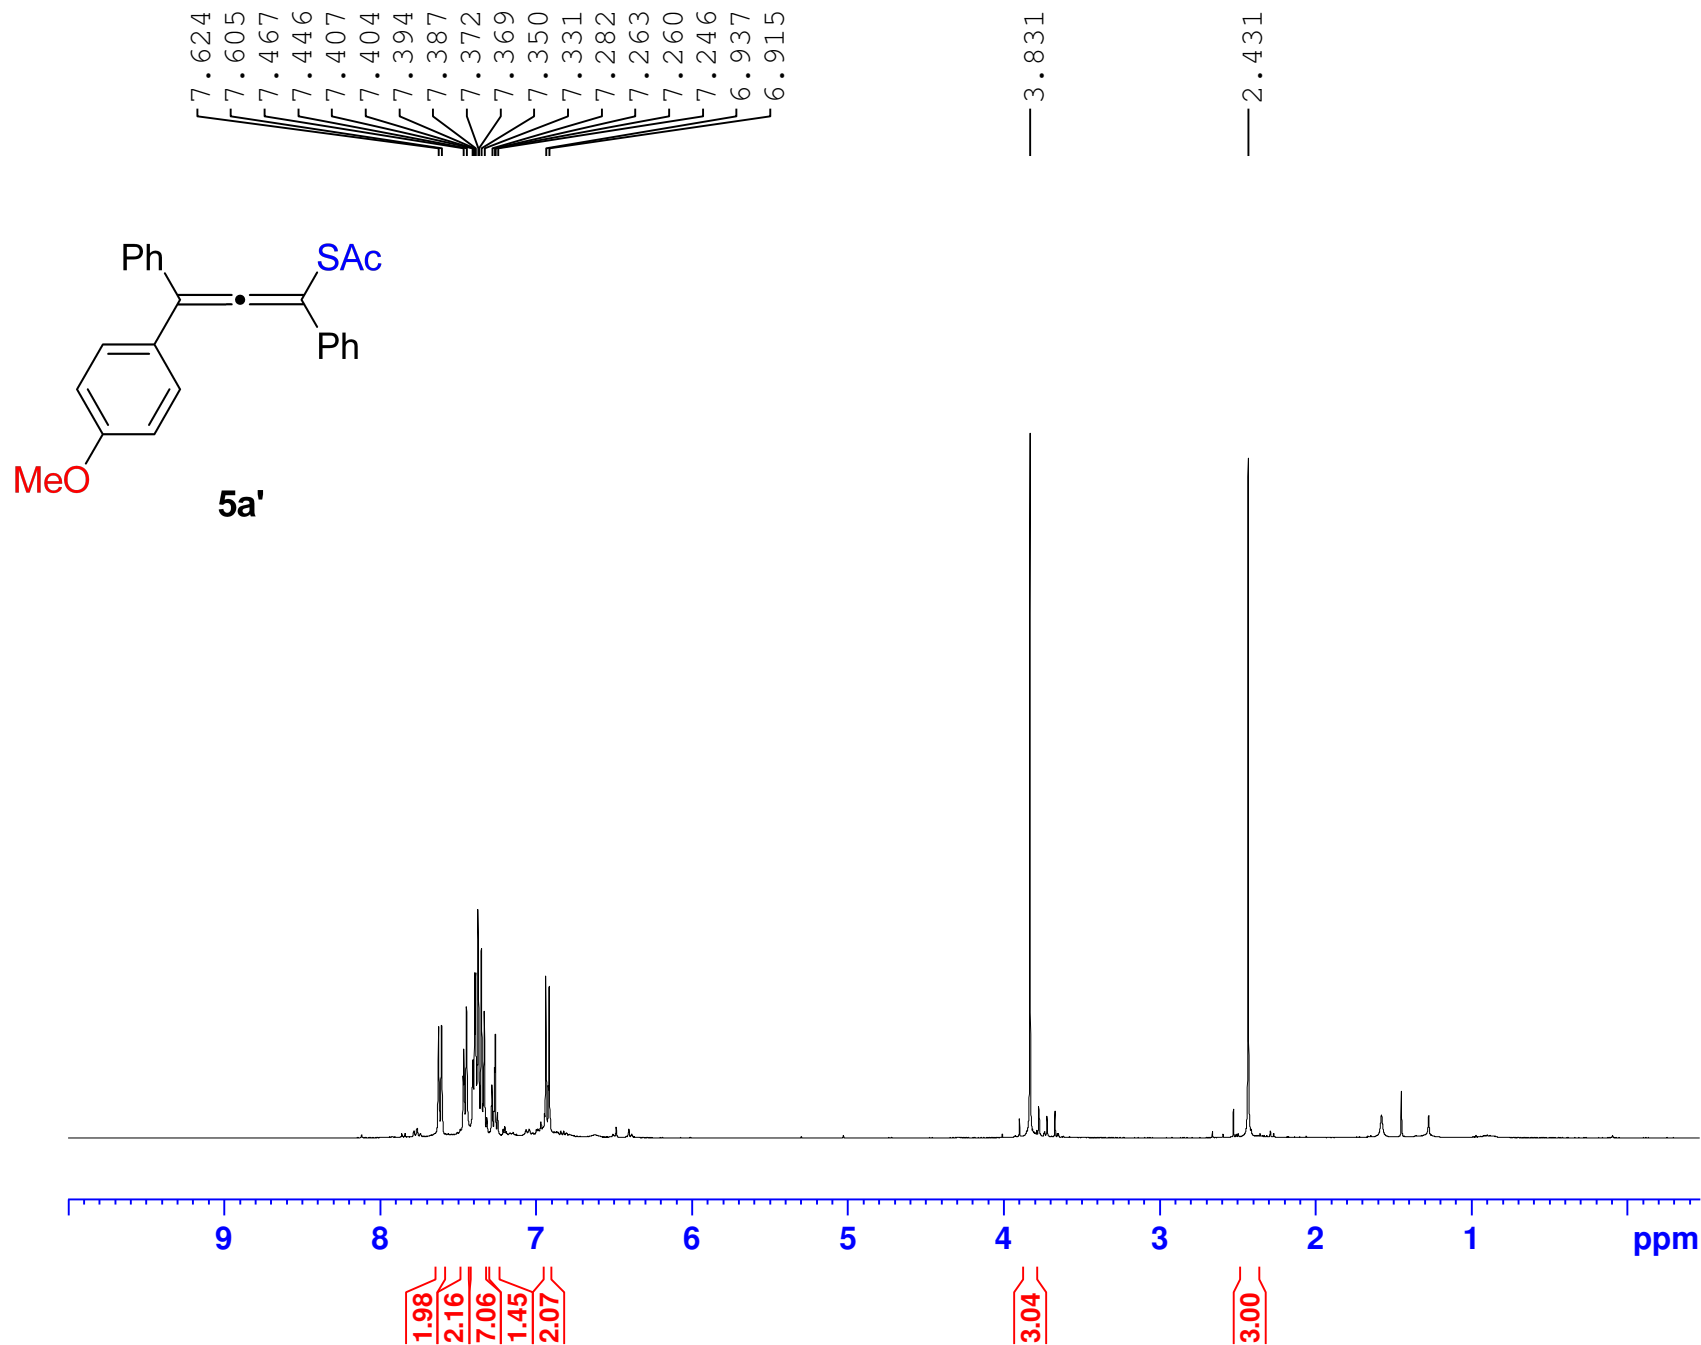

Current Data Parameters  
 NAME qdy-20150-2 H  
 EXPNO 2  
 PROCNO 1

F2 - Acquisition Parameters  
 Date\_ 20160517  
 Time 15.13  
 INSTRUM spect  
 PROBHD 5 mm PABBO BB/  
 PULPROG zg30  
 TD 65536  
 SOLVENT CDC13  
 NS 8  
 DS 0  
 SWH 8012.820 Hz  
 FIDRES 0.122266 Hz  
 AQ 4.0894465 sec  
 RG 88.84  
 DW 62.400 usec  
 DE 6.50 usec  
 TE 296.3 K  
 D1 1.00000000 sec  
 TD0 1

==== CHANNEL f1 =====  
 SFO1 400.1324710 MHz  
 NUC1 1H  
 P1 14.50 usec  
 PLW1 11.99499989 W

F2 - Processing parameters  
 SI 65536  
 SF 400.1300093 MHz  
 WDW EM  
 SSB 0  
 LB 0.30 Hz  
 GB 0  
 PC 1.00

Supplementary Figure 106. <sup>1</sup>H NMR spectrum for 5a'

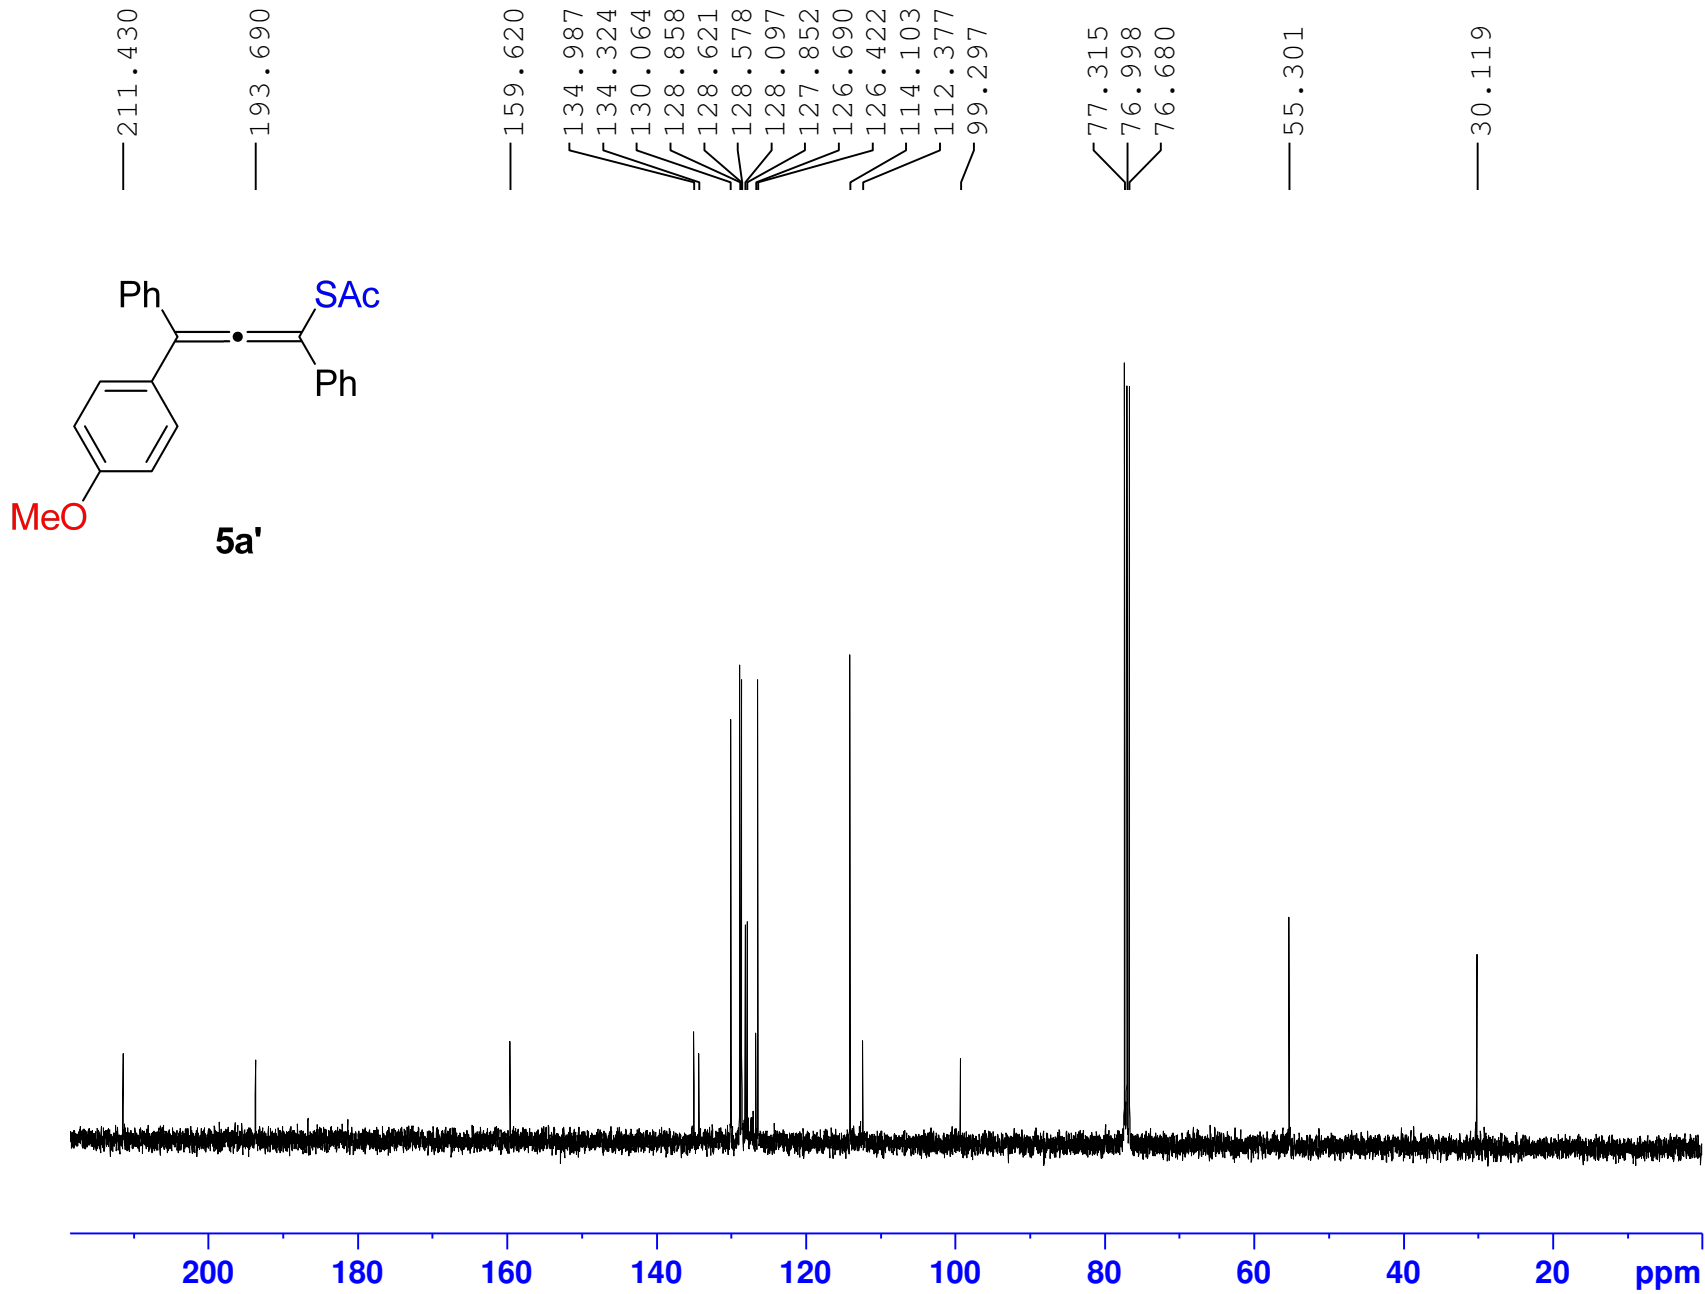

Current Data Parameters  
 NAME qdy-20150-2 C  
 EXPNO 1  
 PROCNO 1

F2 - Acquisition Parameters  
 Date\_ 20160515  
 Time 20.48  
 INSTRUM spect  
 PROBHD 5 mm PABBO BB/  
 PULPROG zgpg30  
 TD 65536  
 SOLVENT CDC13  
 NS 180  
 DS 0  
 SWH 24038.461 Hz  
 FIDRES 0.366798 Hz  
 AQ 1.3631488 sec  
 RG 196.92  
 DW 20.800 usec  
 DE 6.50 usec  
 TE 299.5 K  
 D1 2.00000000 sec  
 D11 0.03000000 sec  
 TD0 1

==== CHANNEL f1 =====  
 SFO1 100.6228298 MHz  
 NUC1 13C  
 P1 9.70 usec  
 PLW1 46.98899841 W

==== CHANNEL f2 =====  
 SFO2 400.1316005 MHz  
 NUC2 1H  
 CPDPRG[2] waltz16  
 PCPD2 90.00 usec  
 PLW2 11.99499989 W  
 PLW12 0.34213999 W  
 PLW13 0.27713001 W

F2 - Processing parameters  
 SI 32768  
 SF 100.6127744 MHz  
 WDW EM  
 SSB 0  
 LB 1.00 Hz  
 GB 0  
 PC 1.40

Supplementary Figure 107. <sup>13</sup>C NMR spectrum for 5a'



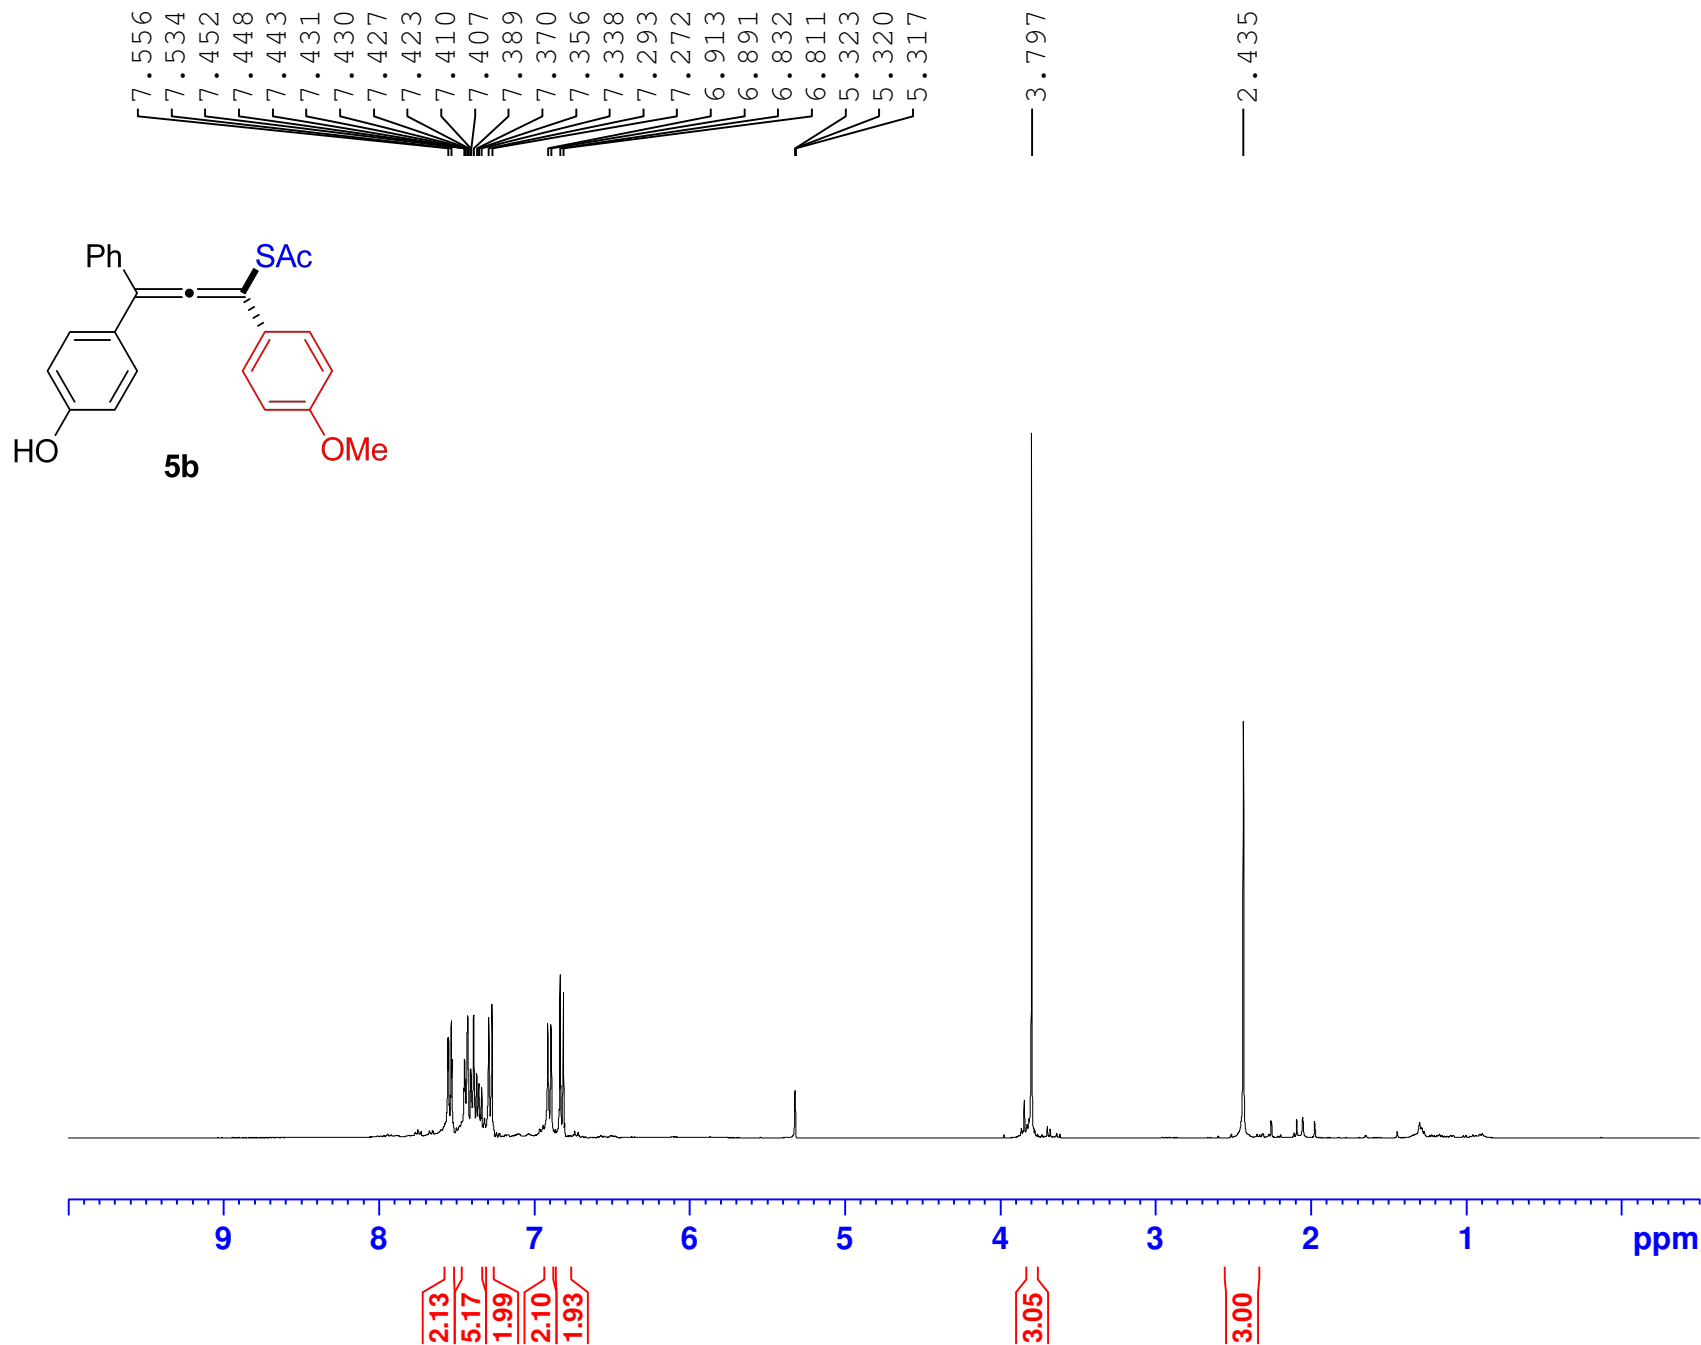

Current Data Parameters  
 NAME qdy-20133-1 H  
 EXPNO 1  
 PROCNO 1

F2 - Acquisition Parameters  
 Date\_ 20160525  
 Time 20.19  
 INSTRUM spect  
 PROBHD 5 mm PABBO BB/  
 PULPROG zg30  
 TD 65536  
 SOLVENT CD2C12  
 NS 4  
 DS 0  
 SWH 8012.820 Hz  
 FIDRES 0.122266 Hz  
 AQ 4.0894465 sec  
 RG 54.81  
 DW 62.400 usec  
 DE 6.50 usec  
 TE 297.6 K  
 D1 1.00000000 sec  
 TD0 1

==== CHANNEL f1 =====  
 SFO1 400.1324710 MHz  
 NUC1 1H  
 P1 14.50 usec  
 PLW1 11.99499989 W

F2 - Processing parameters  
 SI 65536  
 SF 400.1300152 MHz  
 WDW EM  
 SSB 0  
 LB 0.30 Hz  
 GB 0  
 PC 1.00

Supplementary Figure 108.  $^1\text{H NMR}$  spectrum for **5b**

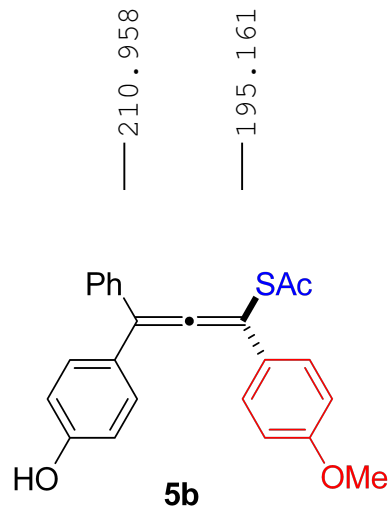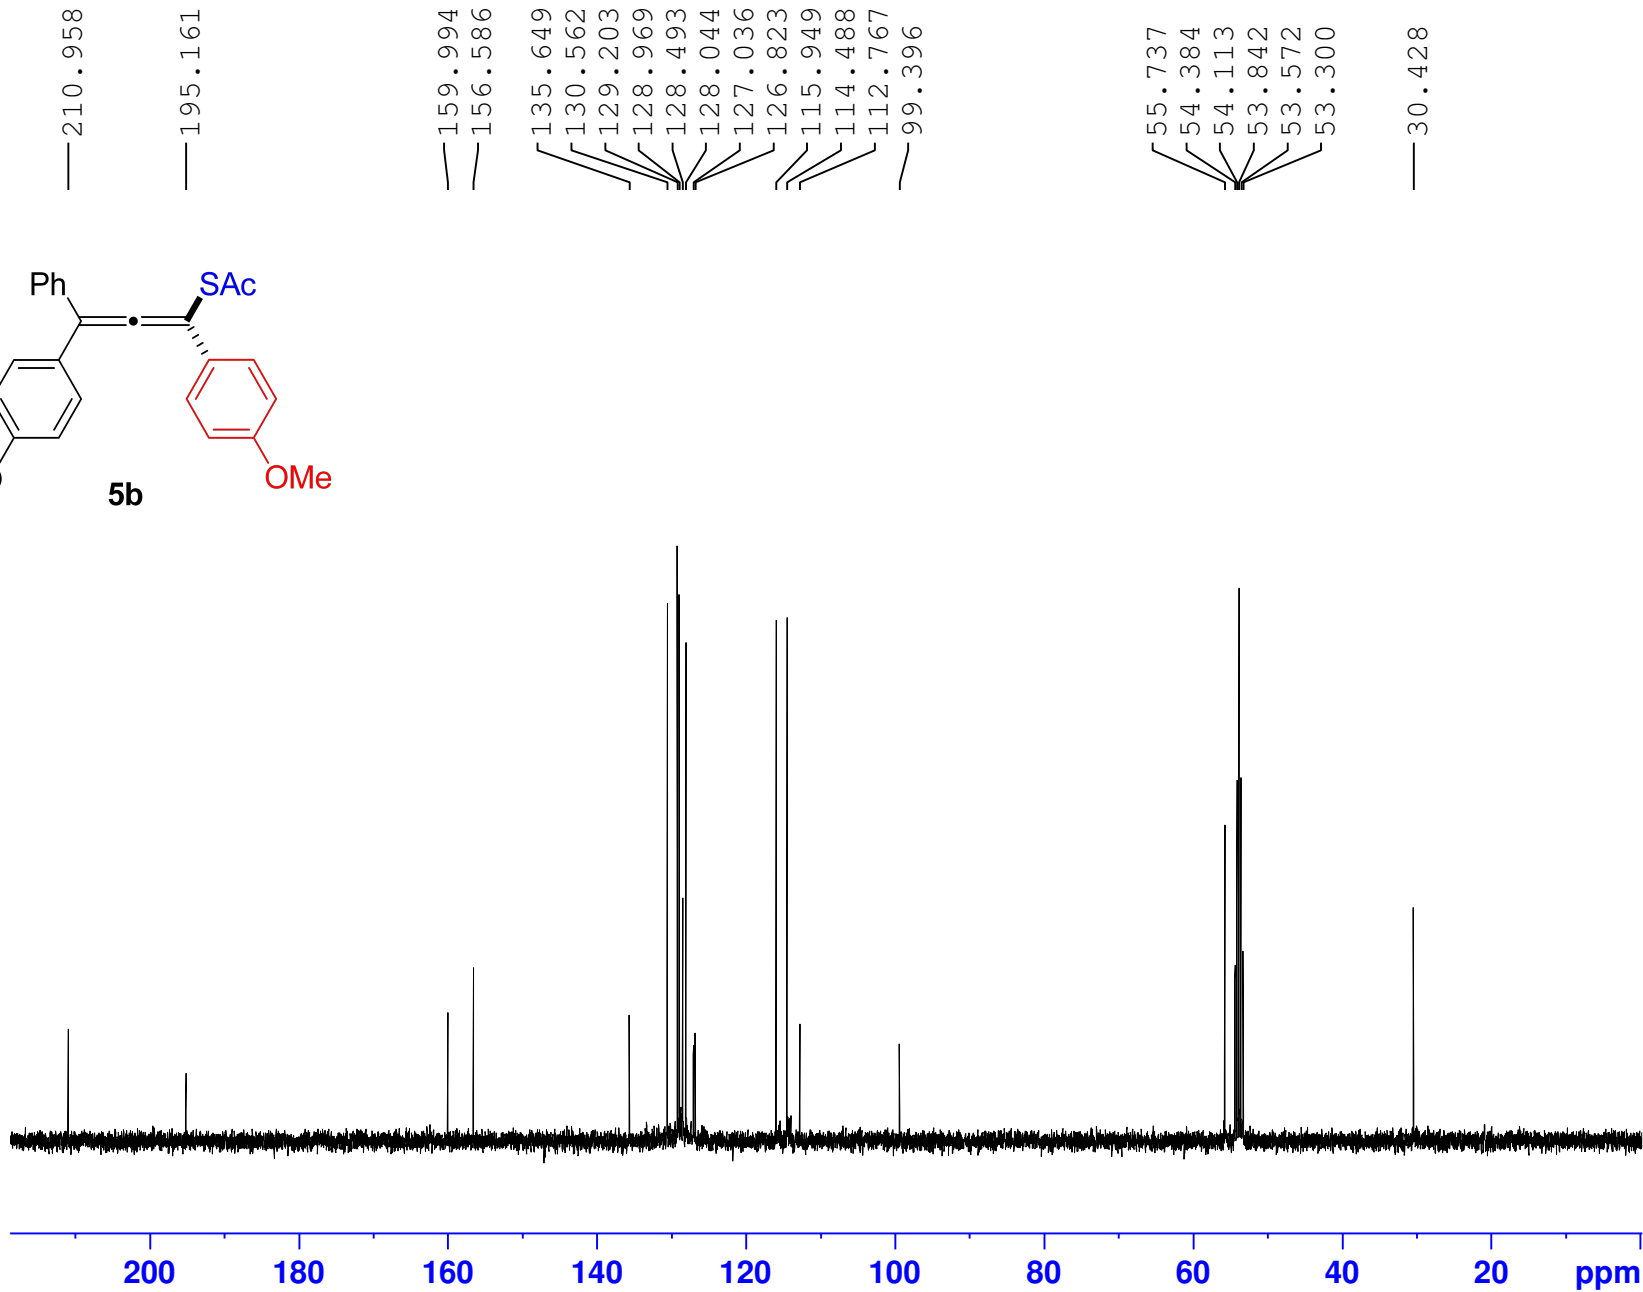

Current Data Parameters  
 NAME qdy-20133-1 C  
 EXPNO 1  
 PROCNO 1

F2 - Acquisition Parameters  
 Date\_ 20160525  
 Time 13.26  
 INSTRUM spect  
 PROBHD 5 mm PABBO BB/  
 PULPROG zgpg30  
 TD 65536  
 SOLVENT CD2C12  
 NS 81  
 DS 0  
 SWH 24038.461 Hz  
 FIDRES 0.366798 Hz  
 AQ 1.3631488 sec  
 RG 196.92  
 DW 20.800 usec  
 DE 6.50 usec  
 TE 298.5 K  
 D1 2.00000000 sec  
 D11 0.03000000 sec  
 TD0 1

==== CHANNEL f1 =====  
 SFO1 100.6228298 MHz  
 NUC1 13C  
 P1 9.70 usec  
 PLW1 46.98899841 W

==== CHANNEL f2 =====  
 SFO2 400.1316005 MHz  
 NUC2 1H  
 CPDPRG[2] waltz16  
 PCPD2 90.00 usec  
 PLW2 11.99499989 W  
 PLW12 0.34213999 W  
 PLW13 0.27713001 W

F2 - Processing parameters  
 SI 32768  
 SF 100.6127314 MHz  
 WDW EM  
 SSB 0  
 LB 1.00 Hz  
 GB 0  
 PC 1.40

**Supplementary Figure 109. <sup>13</sup>C NMR spectrum for 5b**

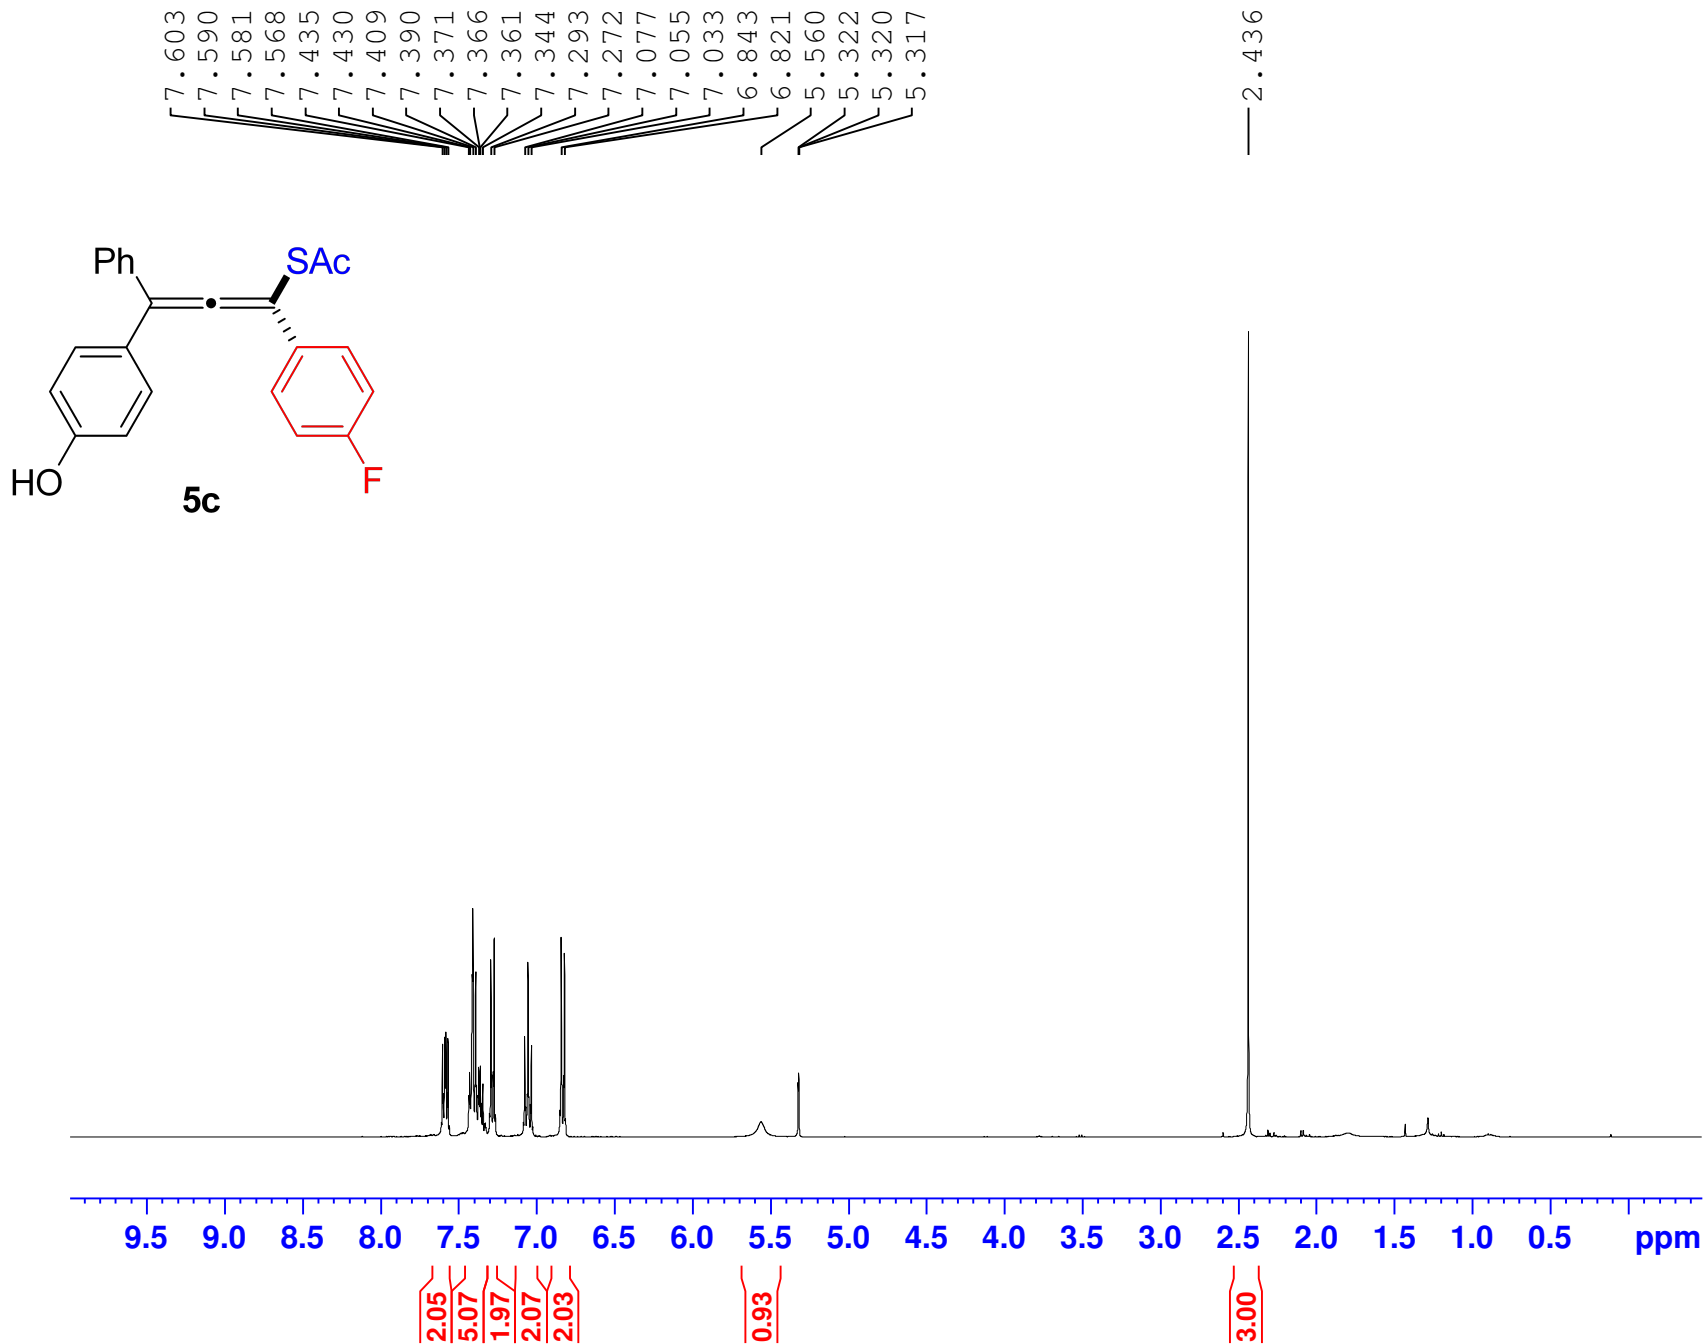

Current Data Parameters  
 NAME qdy-20144-1 H  
 EXPNO 2  
 PROCNO 1

F2 - Acquisition Parameters  
 Date\_ 20160511  
 Time 13.45  
 INSTRUM spect  
 PROBHD 5 mm PABBO BB/  
 PULPROG zg30  
 TD 65536  
 SOLVENT CD2C12  
 NS 9  
 DS 0  
 SWH 8012.820 Hz  
 FIDRES 0.122266 Hz  
 AQ 4.0894465 sec  
 RG 88.84  
 DW 62.400 usec  
 DE 6.50 usec  
 TE 297.1 K  
 D1 1.00000000 sec  
 TD0 1

===== CHANNEL f1 =====  
 SFO1 400.1324710 MHz  
 NUC1 1H  
 P1 14.50 usec  
 PLW1 11.99499989 W

F2 - Processing parameters  
 SI 65536  
 SF 400.1300153 MHz  
 WDW EM  
 SSB 0  
 LB 0.30 Hz  
 GB 0  
 PC 1.00

Supplementary Figure 110. <sup>1</sup>H NMR spectrum for 5c

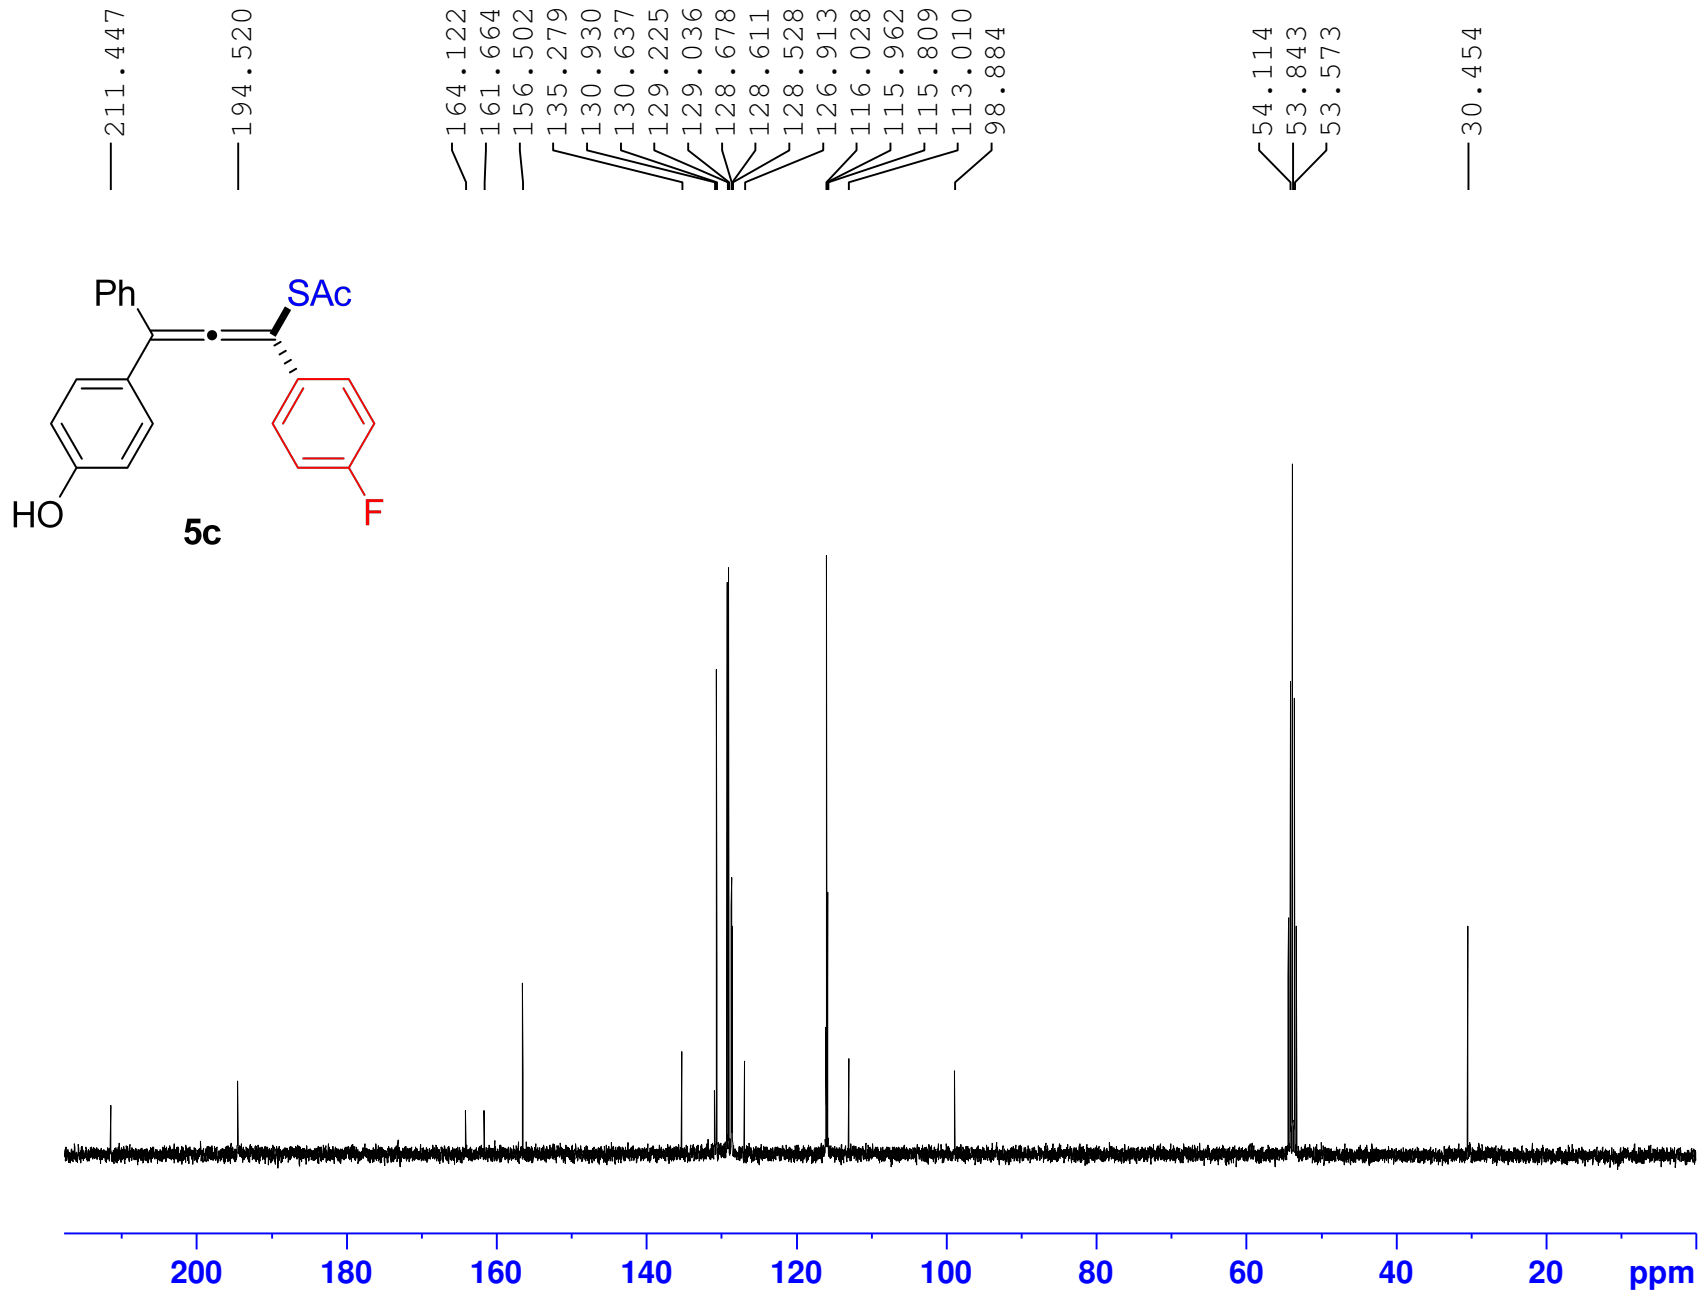

Current Data Parameters  
 NAME qdy-20144-1 C  
 EXPNO 1  
 PROCNO 1

F2 - Acquisition Parameters  
 Date\_ 20160511  
 Time 13.33  
 INSTRUM spect  
 PROBHD 5 mm PABBO BB/  
 PULPROG zgpg30  
 TD 65536  
 SOLVENT CD2C12  
 NS 199  
 DS 0  
 SWH 24038.461 Hz  
 FIDRES 0.366798 Hz  
 AQ 1.3631488 sec  
 RG 196.92  
 DW 20.800 usec  
 DE 6.50 usec  
 TE 297.4 K  
 D1 2.00000000 sec  
 D11 0.03000000 sec  
 TD0 1

==== CHANNEL f1 =====  
 SFO1 100.6228298 MHz  
 NUC1 13C  
 P1 9.70 usec  
 PLW1 46.98899841 W

==== CHANNEL f2 =====  
 SFO2 400.1316005 MHz  
 NUC2 1H  
 CPDPRG[2] waltz16  
 PCPD2 90.00 usec  
 PLW2 11.99499989 W  
 PLW12 0.34213999 W  
 PLW13 0.27713001 W

F2 - Processing parameters  
 SI 32768  
 SF 100.6127284 MHz  
 WDW EM  
 SSB 0  
 LB 1.00 Hz  
 GB 0  
 PC 1.40

Supplementary Figure 111. <sup>13</sup>C NMR spectrum for 5c

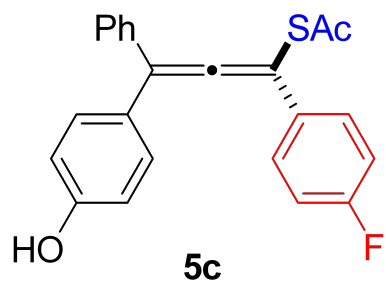

— -114.754

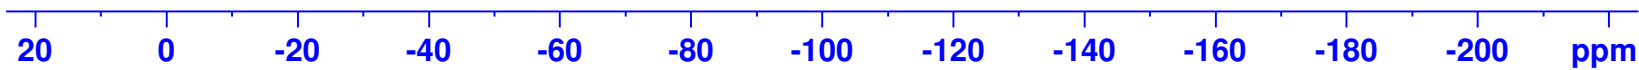

Current Data Parameters  
 NAME qdy-20144-1 F  
 EXPNO 1  
 PROCNO 1

F2 - Acquisition Parameters  
 Date\_ 20160511  
 Time 13.50  
 INSTRUM spect  
 PROBHD 5 mm PABBO BB/  
 PULPROG zgpg30  
 TD 65536  
 SOLVENT CD2C12  
 NS 4  
 DS 0  
 SWH 93750.000 Hz  
 FIDRES 1.430511 Hz  
 AQ 0.3495253 sec  
 RG 196.92  
 DW 5.333 usec  
 DE 6.50 usec  
 TE 296.7 K  
 D1 2.00000000 sec  
 D11 0.03000000 sec  
 TD0 1

==== CHANNEL f1 =====  
 SFO1 376.4607162 MHz  
 NUC1 19F  
 P1 14.70 usec  
 PLW1 15.99600029 W

==== CHANNEL f2 =====  
 SFO2 400.1316005 MHz  
 NUC2 1H  
 CPDPRG[2] waltz16  
 PCPD2 90.00 usec  
 PLW2 11.99499989 W  
 PLW12 0.34213999 W  
 PLW13 0.27713001 W

F2 - Processing parameters  
 SI 32768  
 SF 376.4983660 MHz  
 WDW EM  
 SSB 0  
 LB 1.00 Hz  
 GB 0  
 PC 1.40

Supplementary Figure 112. <sup>19</sup>F NMR spectrum for 5c

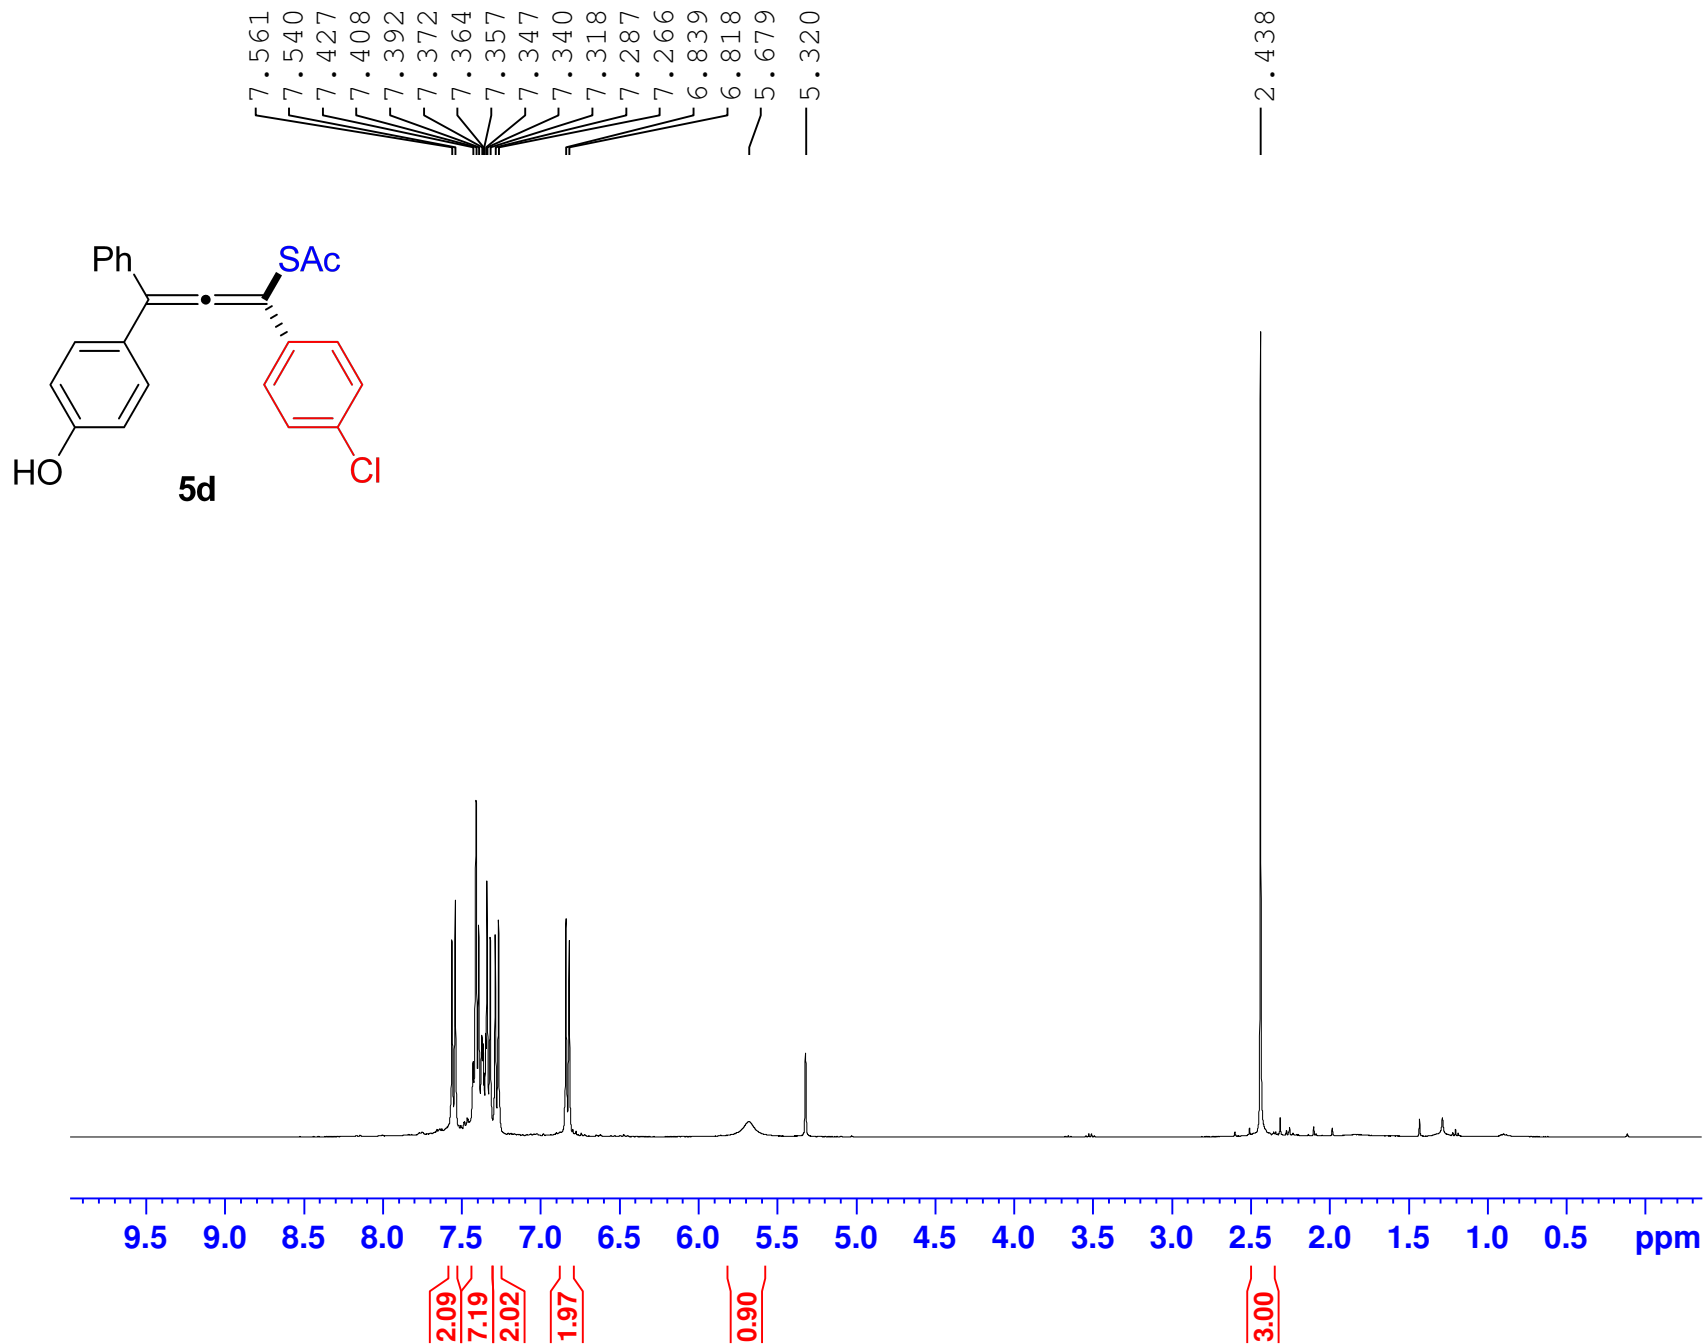

Current Data Parameters  
 NAME qdy-20135-2 H  
 EXPNO 1  
 PROCNO 1

F2 - Acquisition Parameters  
 Date\_ 20160506  
 Time 16.18  
 INSTRUM spect  
 PROBHD 5 mm PABBO BB/  
 PULPROG zg30  
 TD 65536  
 SOLVENT CD2C12  
 NS 4  
 DS 0  
 SWH 8012.820 Hz  
 FIDRES 0.122266 Hz  
 AQ 4.0894465 sec  
 RG 62.93  
 DW 62.400 usec  
 DE 6.50 usec  
 TE 296.4 K  
 D1 1.00000000 sec  
 TD0 1

==== CHANNEL f1 =====  
 SFO1 400.1324710 MHz  
 NUC1 1H  
 P1 14.50 usec  
 PLW1 11.99499989 W

F2 - Processing parameters  
 SI 65536  
 SF 400.1300149 MHz  
 WDW EM  
 SSB 0  
 LB 0.30 Hz  
 GB 0  
 PC 1.00

Supplementary Figure 113. <sup>1</sup>H NMR spectrum for 5d

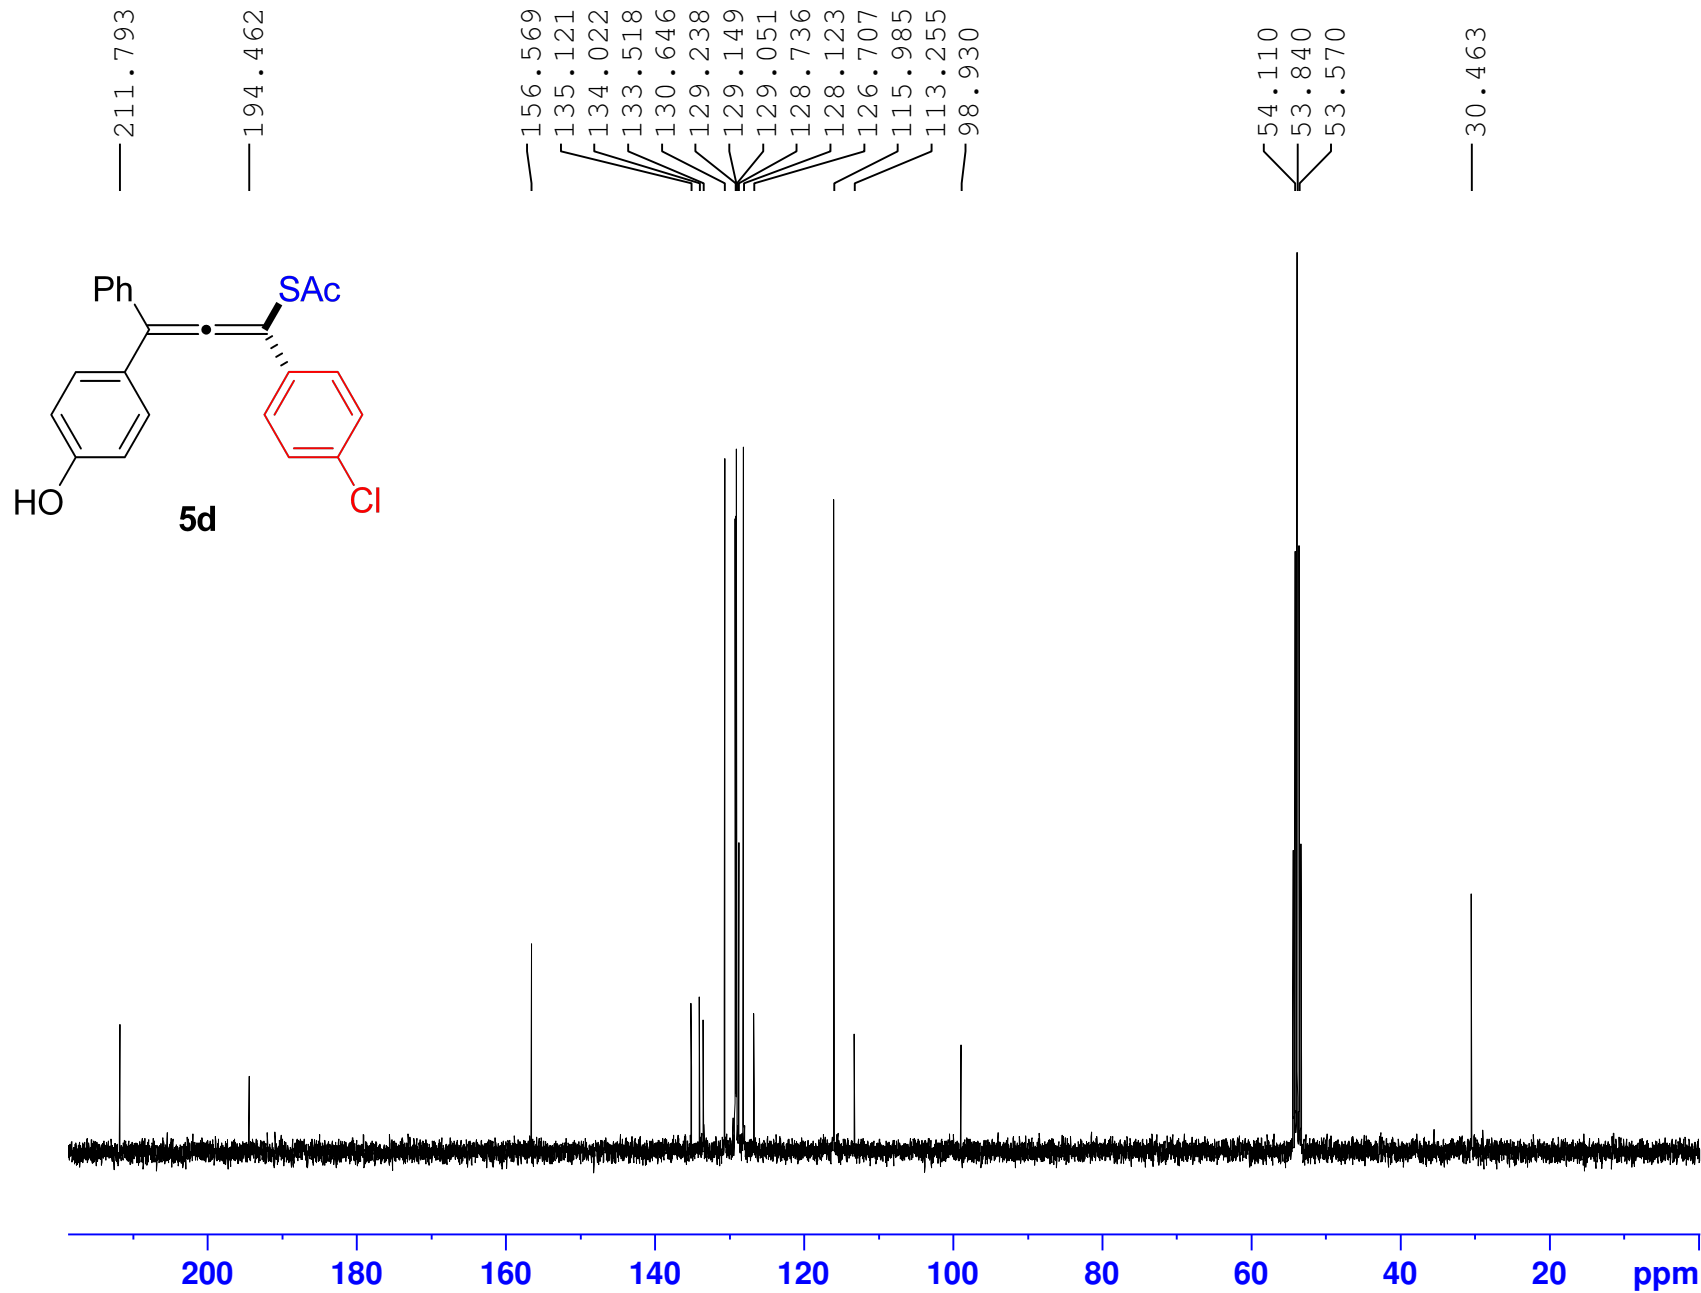

Current Data Parameters  
 NAME qdy-20135-2 C  
 EXPNO 2  
 PROCNO 1

F2 - Acquisition Parameters  
 Date\_ 20160504  
 Time 22.19  
 INSTRUM spect  
 PROBHD 5 mm PABBO BB/  
 PULPROG zgpg30  
 TD 65536  
 SOLVENT CD2C12  
 NS 89  
 DS 0  
 SWH 24038.461 Hz  
 FIDRES 0.366798 Hz  
 AQ 1.3631488 sec  
 RG 196.92  
 DW 20.800 usec  
 DE 6.50 usec  
 TE 298.3 K  
 D1 2.00000000 sec  
 D11 0.03000000 sec  
 TD0 1

==== CHANNEL f1 =====  
 SFO1 100.6228298 MHz  
 NUC1 13C  
 P1 9.70 usec  
 PLW1 46.98899841 W

==== CHANNEL f2 =====  
 SFO2 400.1316005 MHz  
 NUC2 1H  
 CPDPRG[2] waltz16  
 PCPD2 90.00 usec  
 PLW2 11.99499989 W  
 PLW12 0.34213999 W  
 PLW13 0.27713001 W

F2 - Processing parameters  
 SI 32768  
 SF 100.6127292 MHz  
 WDW EM  
 SSB 0  
 LB 1.00 Hz  
 GB 0  
 PC 1.40

Supplementary Figure 114. <sup>13</sup>C NMR spectrum for 5d

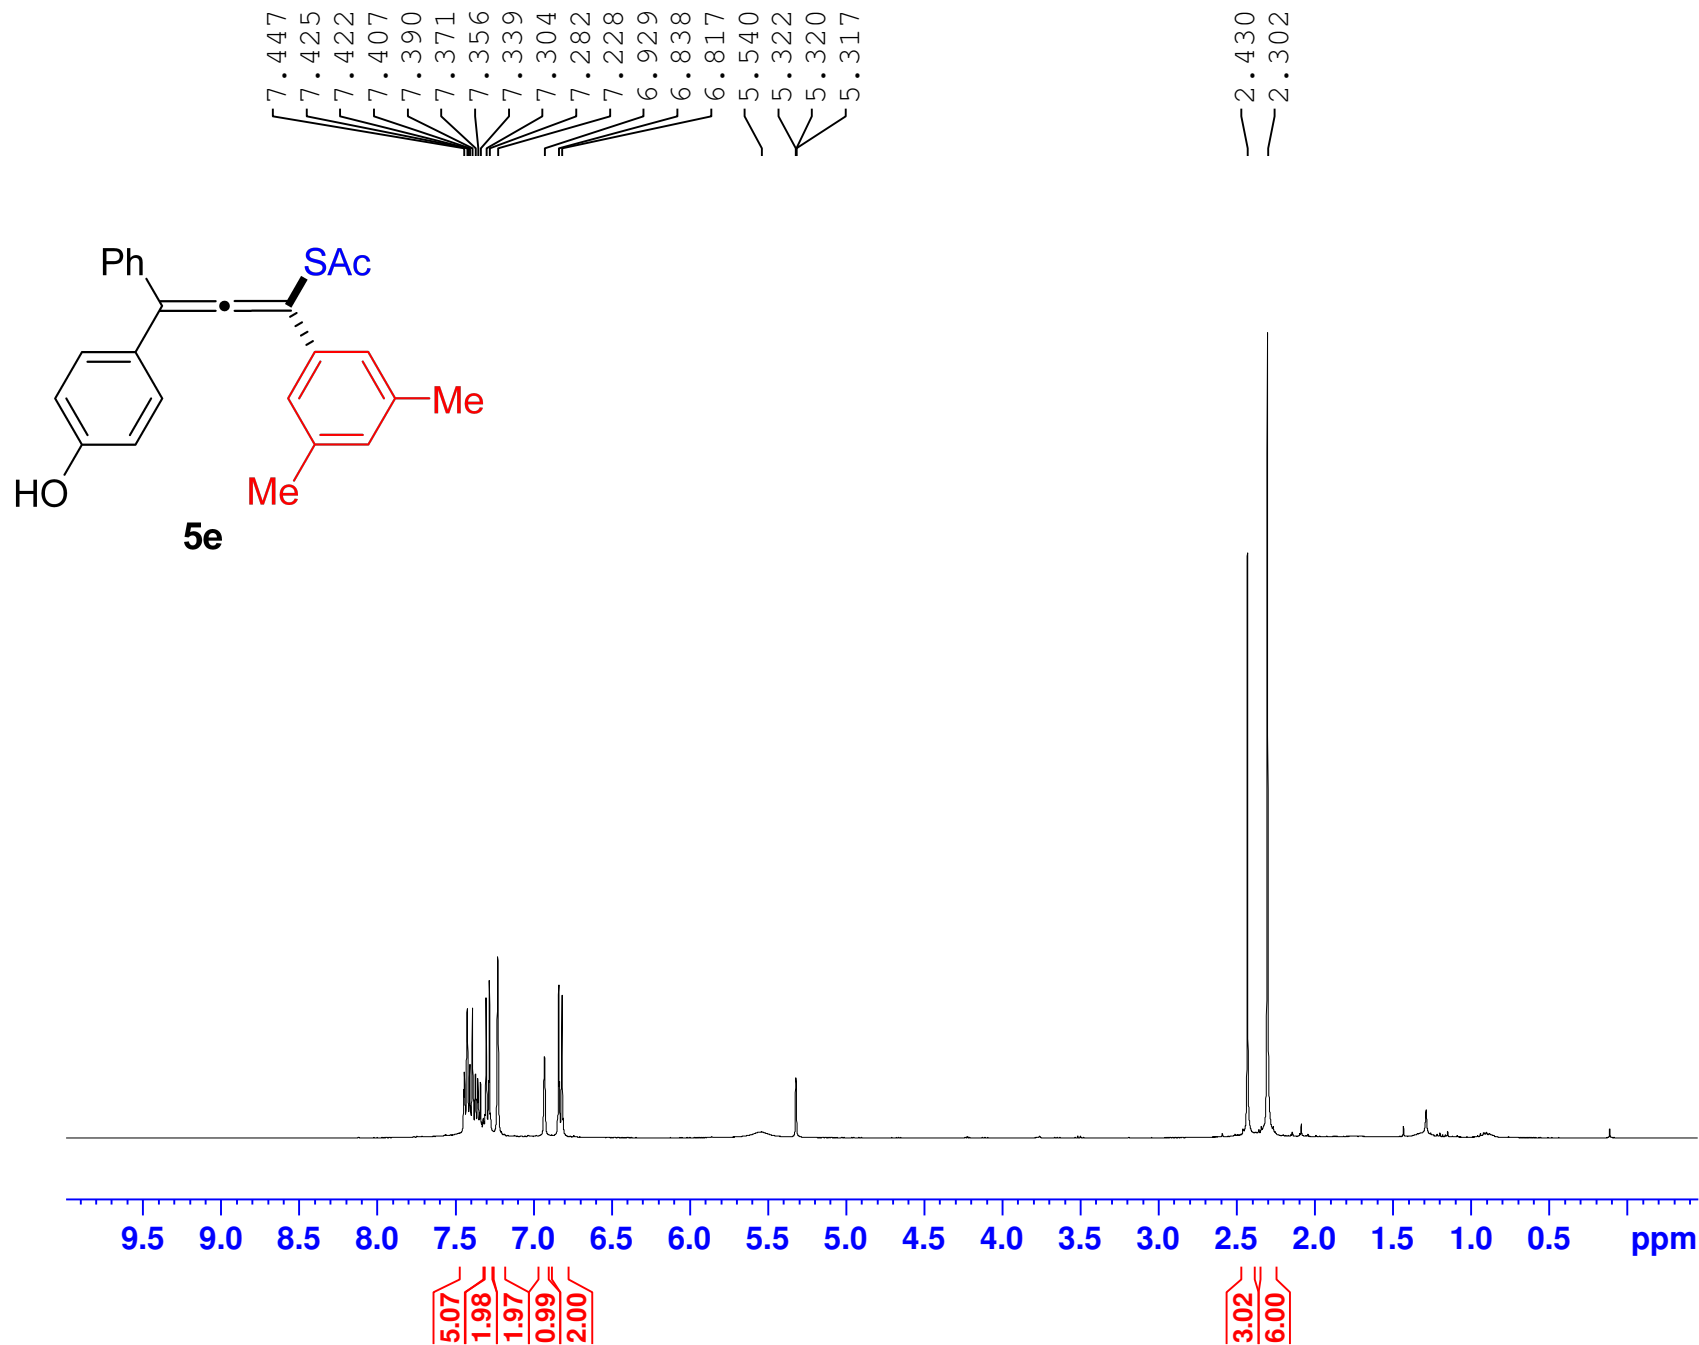

Current Data Parameters  
 NAME qdy-20144-5 H  
 EXPNO 2  
 PROCNO 1

F2 - Acquisition Parameters  
 Date\_ 20160509  
 Time 22.16  
 INSTRUM spect  
 PROBHD 5 mm PABBO BB/  
 PULPROG zg30  
 TD 65536  
 SOLVENT CD2C12  
 NS 4  
 DS 0  
 SWH 8012.820 Hz  
 FIDRES 0.122266 Hz  
 AQ 4.0894465 sec  
 RG 54.81  
 DW 62.400 usec  
 DE 6.50 usec  
 TE 297.6 K  
 D1 1.00000000 sec  
 TD0 1

==== CHANNEL f1 =====  
 SFO1 400.1324710 MHz  
 NUC1 1H  
 P1 14.50 usec  
 PLW1 11.99499989 W

F2 - Processing parameters  
 SI 65536  
 SF 400.1300152 MHz  
 WDW EM  
 SSB 0  
 LB 0.30 Hz  
 GB 0  
 PC 1.00

Supplementary Figure 115.  $^1\text{H}$  NMR spectrum for **5e**



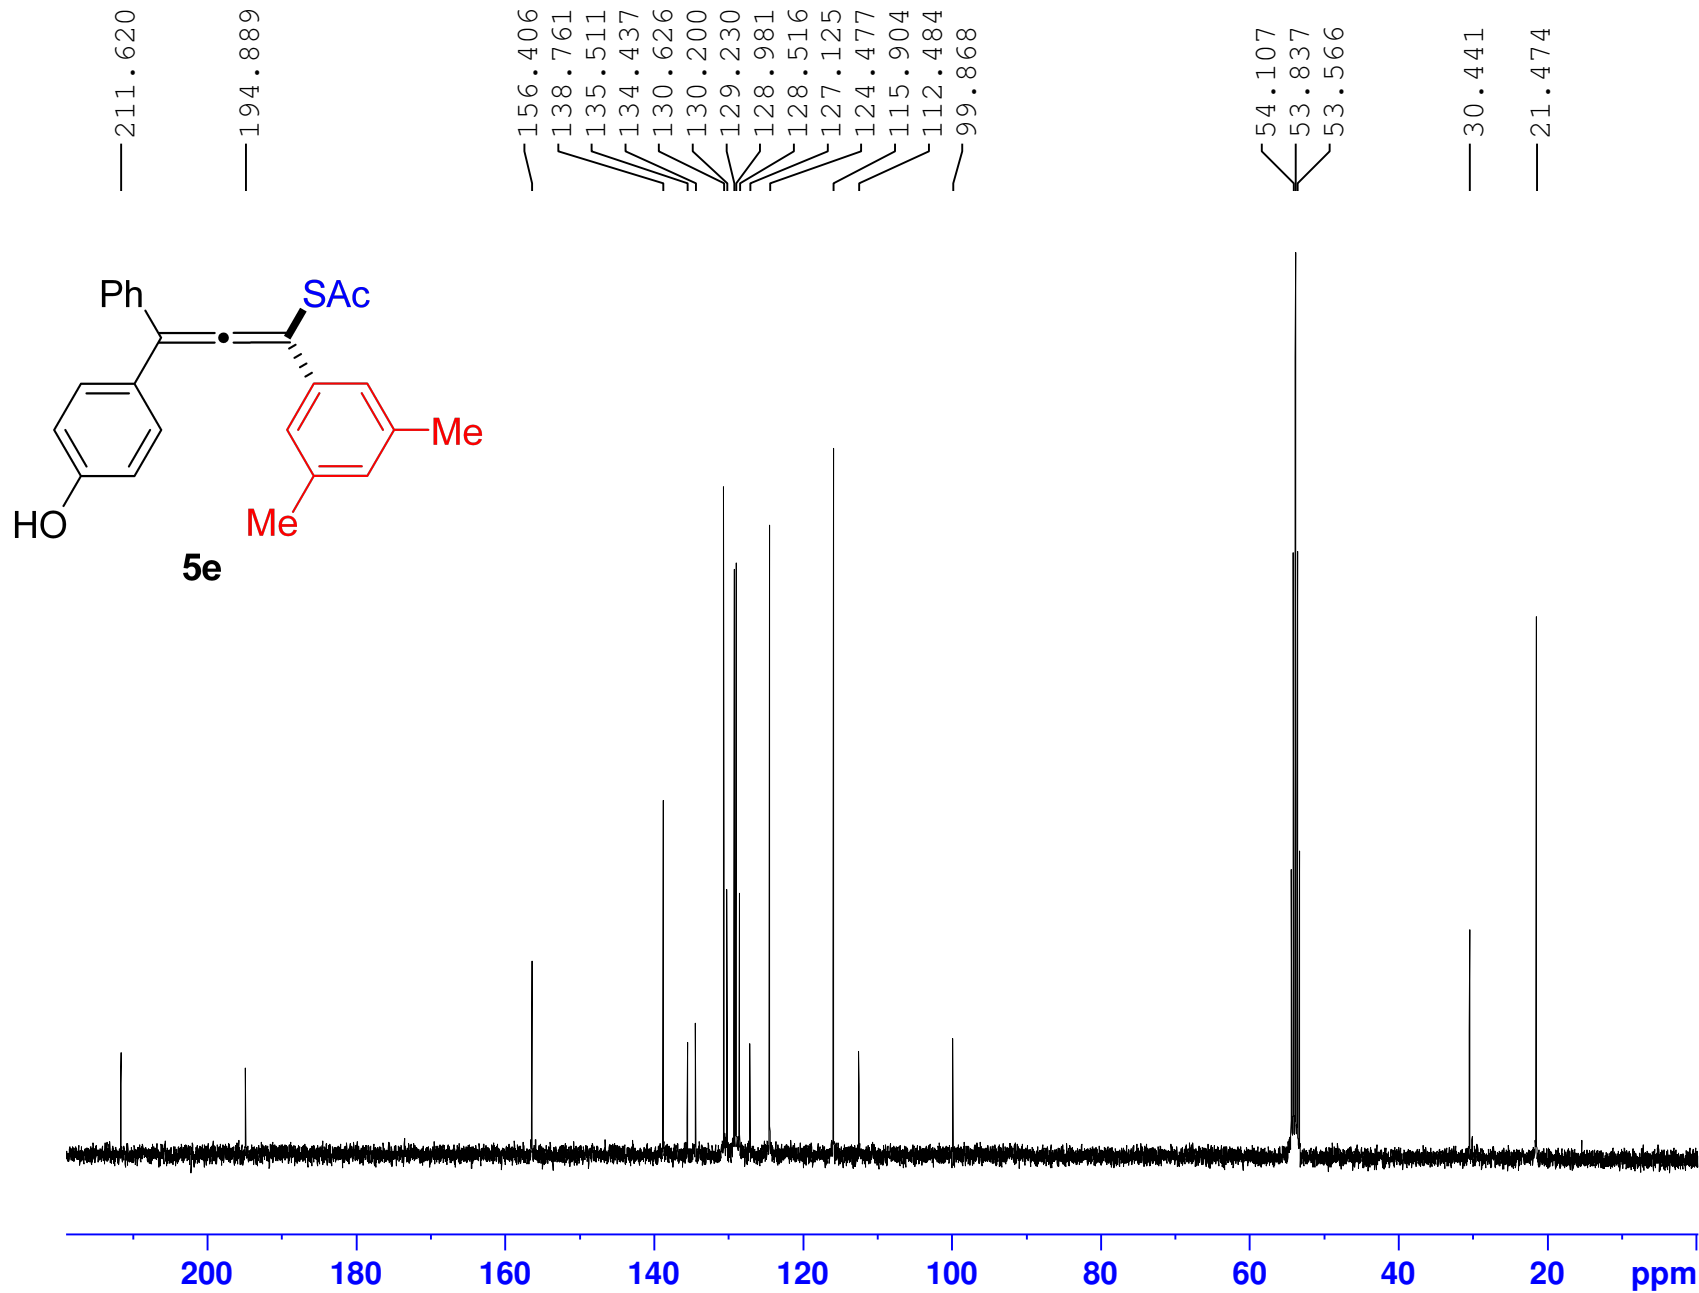

Current Data Parameters  
 NAME qdy-20144-5 C  
 EXPNO 1  
 PROCNO 1

F2 - Acquisition Parameters  
 Date\_ 20160509  
 Time 20.02  
 INSTRUM spect  
 PROBHD 5 mm PABBO BB/  
 PULPROG zgpg30  
 TD 65536  
 SOLVENT CD2C12  
 NS 176  
 DS 0  
 SWH 24038.461 Hz  
 FIDRES 0.366798 Hz  
 AQ 1.3631488 sec  
 RG 196.92  
 DW 20.800 usec  
 DE 6.50 usec  
 TE 297.3 K  
 D1 2.00000000 sec  
 D11 0.03000000 sec  
 TD0 1

==== CHANNEL f1 =====  
 SFO1 100.6228298 MHz  
 NUC1 13C  
 P1 9.70 usec  
 PLW1 46.98899841 W

==== CHANNEL f2 =====  
 SFO2 400.1316005 MHz  
 NUC2 1H  
 CPDPRG[2] waltz16  
 PCPD2 90.00 usec  
 PLW2 11.99499989 W  
 PLW12 0.34213999 W  
 PLW13 0.27713001 W

F2 - Processing parameters  
 SI 32768  
 SF 100.6127292 MHz  
 WDW EM  
 SSB 0  
 LB 1.00 Hz  
 GB 0  
 PC 1.40

Supplementary Figure 116. <sup>13</sup>C NMR spectrum for **5e**

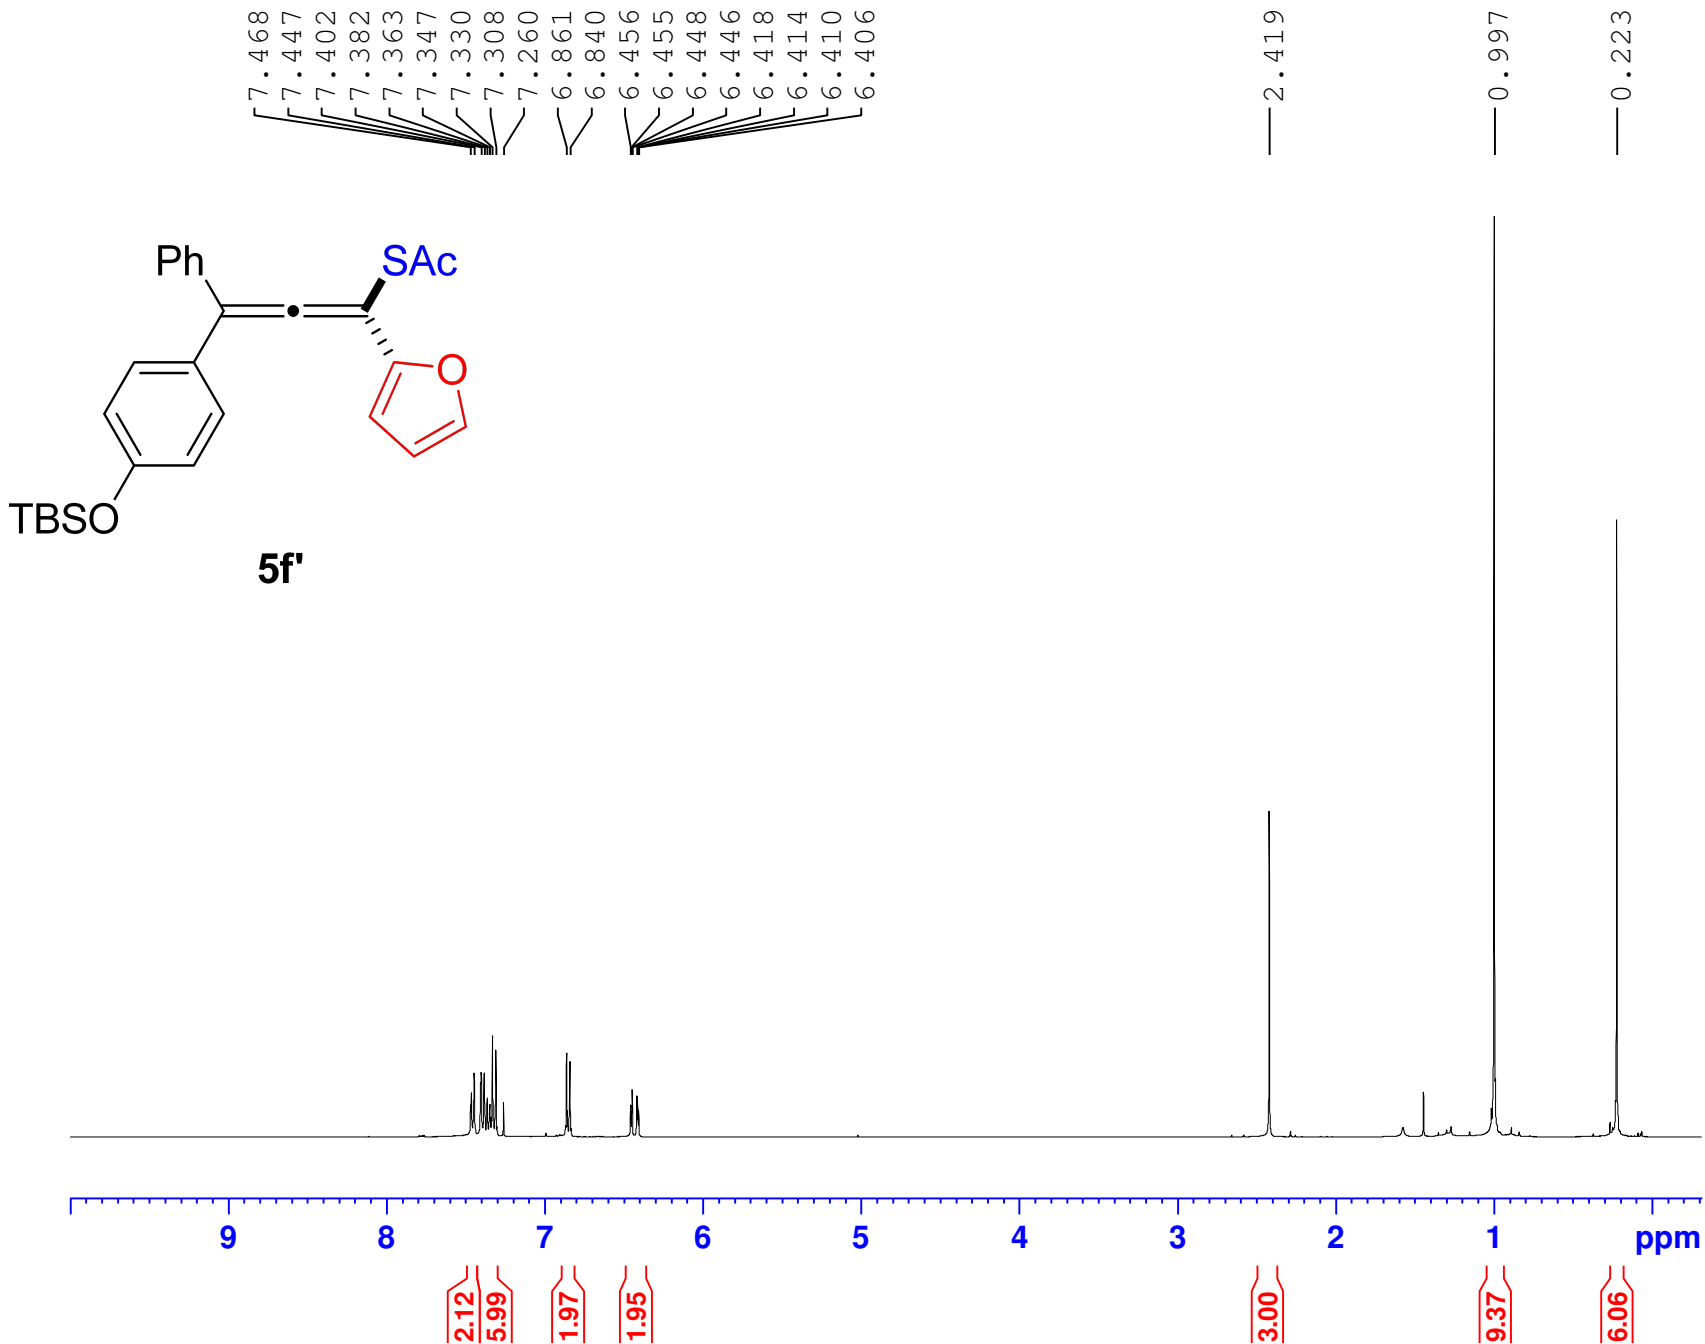

Current Data Parameters  
 NAME qdy-20160-1 H  
 EXPNO 2  
 PROCNO 1

F2 - Acquisition Parameters  
 Date\_ 20160525  
 Time 16.33  
 INSTRUM spect  
 PROBHD 5 mm PABBO BB/  
 PULPROG zg30  
 TD 65536  
 SOLVENT CDC13  
 NS 5  
 DS 0  
 SWH 8012.820 Hz  
 FIDRES 0.122266 Hz  
 AQ 4.0894465 sec  
 RG 62.93  
 DW 62.400 usec  
 DE 6.50 usec  
 TE 297.9 K  
 D1 1.00000000 sec  
 TD0 1

===== CHANNEL f1 =====  
 SFO1 400.1324710 MHz  
 NUC1 1H  
 P1 14.50 usec  
 PLW1 11.99499989 W

F2 - Processing parameters  
 SI 65536  
 SF 400.1300093 MHz  
 WDW EM  
 SSB 0  
 LB 0.30 Hz  
 GB 0  
 PC 1.00

Supplementary Figure 117. <sup>1</sup>H NMR spectrum for 5f'

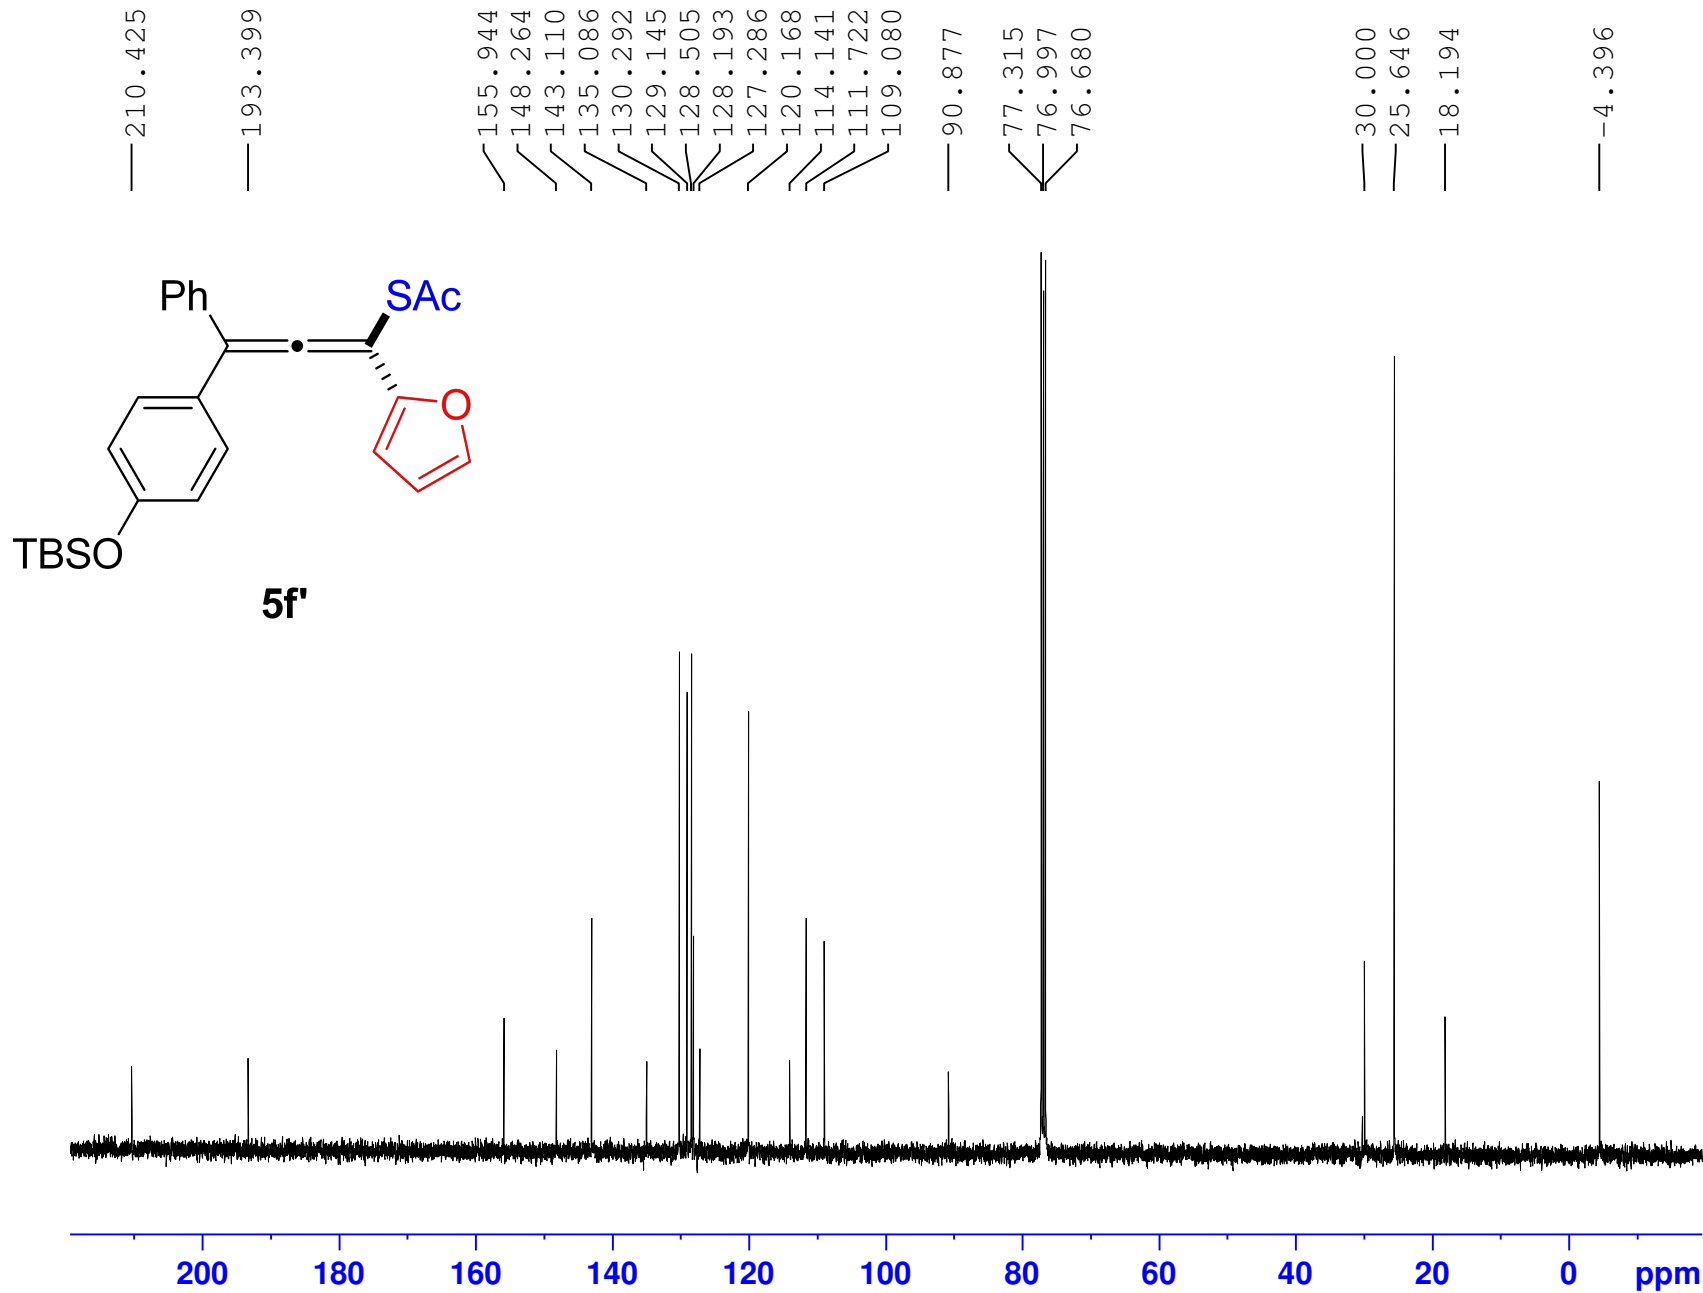

Current Data Parameters  
 NAME qdy-20160-1 C  
 EXPNO 2  
 PROCNO 1

F2 - Acquisition Parameters  
 Date\_ 20160525  
 Time 16.40  
 INSTRUM spect  
 PROBHD 5 mm PABBO BB/  
 PULPROG zgpg30  
 TD 65536  
 SOLVENT CDC13  
 NS 168  
 DS 0  
 SWH 24038.461 Hz  
 FIDRES 0.366798 Hz  
 AQ 1.3631488 sec  
 RG 196.92  
 DW 20.800 usec  
 DE 6.50 usec  
 TE 298.9 K  
 D1 2.00000000 sec  
 D11 0.03000000 sec  
 TD0 1

==== CHANNEL f1 =====  
 SFO1 100.6228298 MHz  
 NUC1 13C  
 P1 9.70 usec  
 PLW1 46.98899841 W

==== CHANNEL f2 =====  
 SFO2 400.1316005 MHz  
 NUC2 1H  
 CPDPRG[2] waltz16  
 PCPD2 90.00 usec  
 PLW2 11.99499989 W  
 PLW12 0.34213999 W  
 PLW13 0.27713001 W

F2 - Processing parameters  
 SI 32768  
 SF 100.6127728 MHz  
 WDW EM  
 SSB 0  
 LB 1.00 Hz  
 GB 0  
 PC 1.40

Supplementary Figure 118. <sup>13</sup>C NMR spectrum for 5f

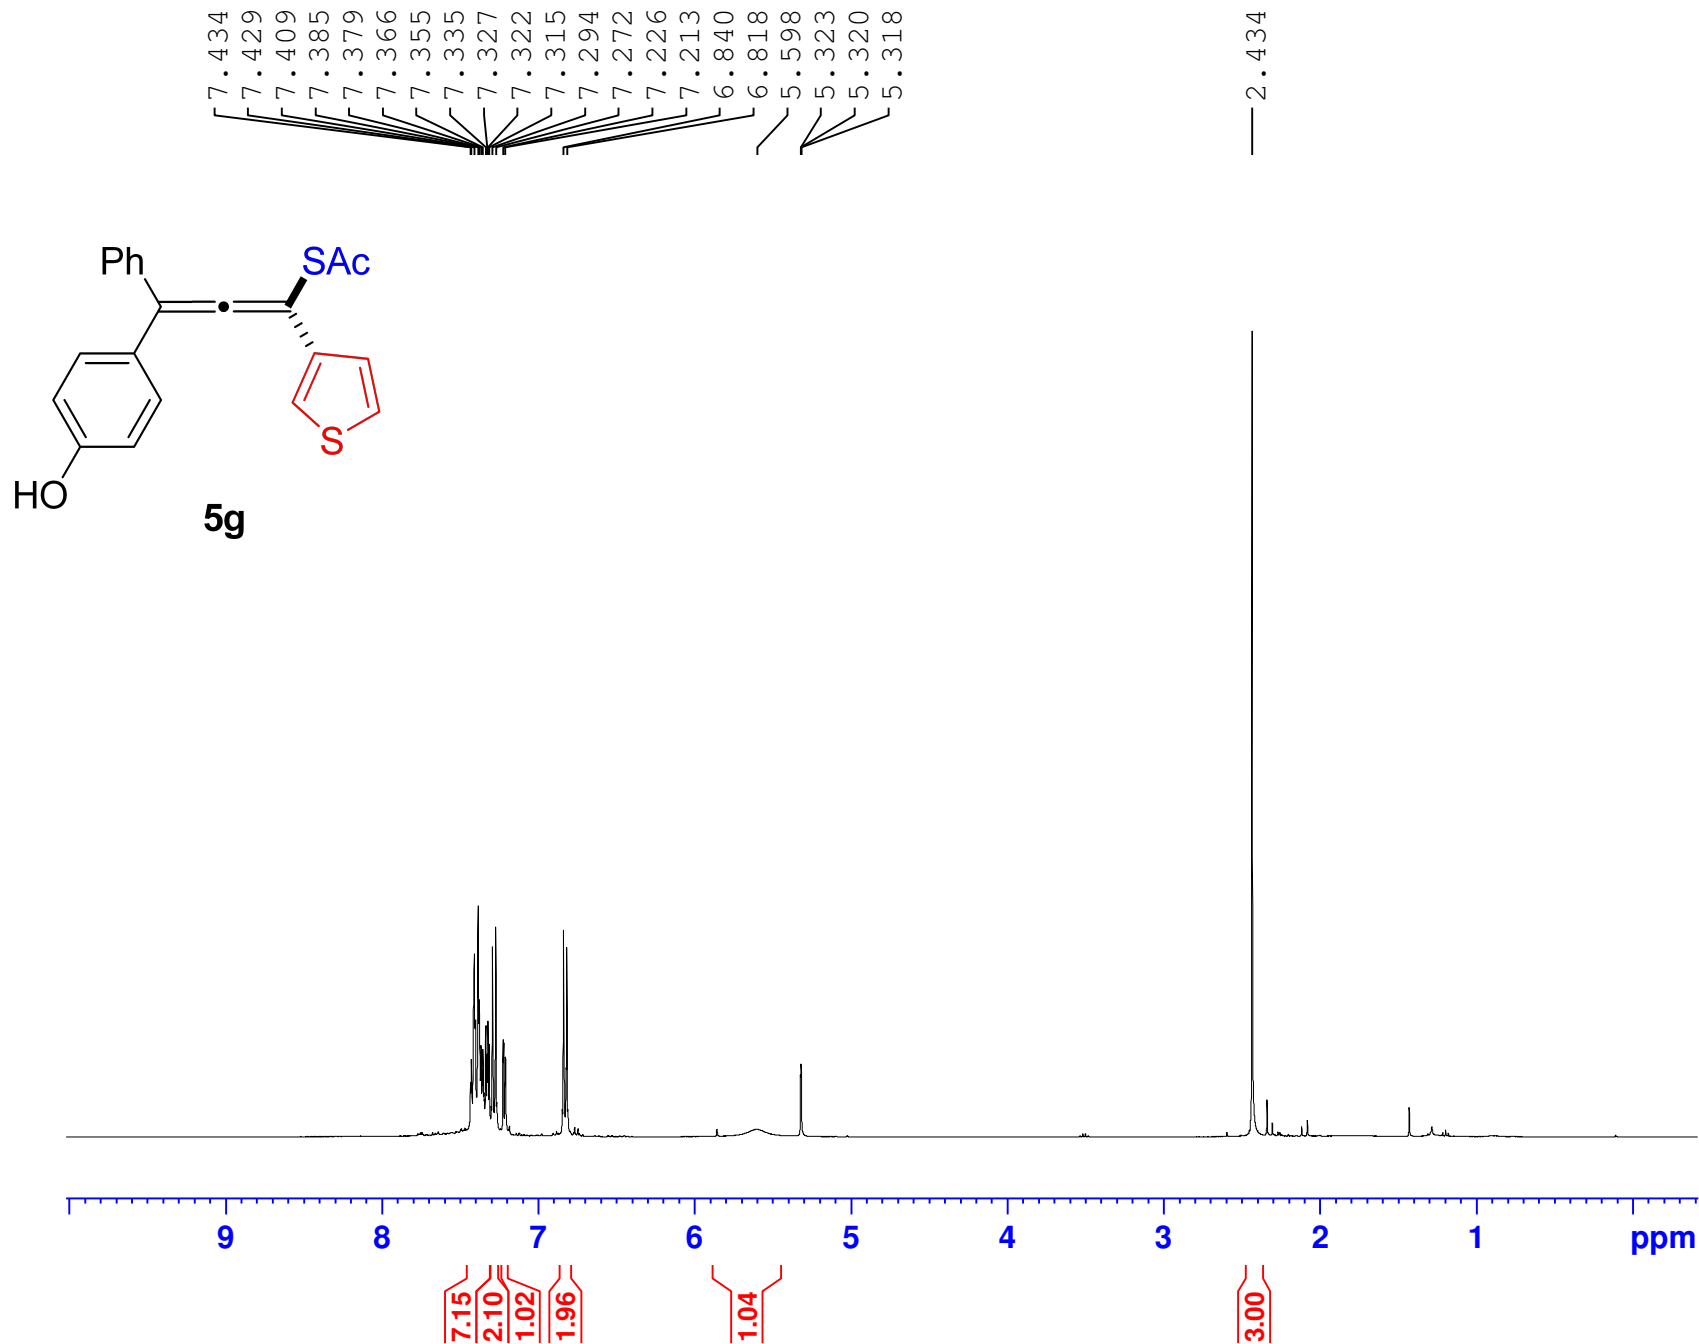

Current Data Parameters  
 NAME qdy-20115-1 H  
 EXPNO 4  
 PROCNO 1

F2 - Acquisition Parameters  
 Date\_ 20160416  
 Time 19.26  
 INSTRUM spect  
 PROBHD 5 mm PABBO BB/  
 PULPROG zg30  
 TD 65536  
 SOLVENT CD2C12  
 NS 8  
 DS 0  
 SWH 8012.820 Hz  
 FIDRES 0.122266 Hz  
 AQ 4.0894465 sec  
 RG 82.92  
 DW 62.400 usec  
 DE 6.50 usec  
 TE 298.5 K  
 D1 1.00000000 sec  
 TD0 1

==== CHANNEL f1 =====  
 SFO1 400.1324710 MHz  
 NUC1 1H  
 P1 14.50 usec  
 PLW1 11.99499989 W

F2 - Processing parameters  
 SI 65536  
 SF 400.1300152 MHz  
 WDW EM  
 SSB 0  
 LB 0.30 Hz  
 GB 0  
 PC 1.00

**Supplementary Figure 119. <sup>1</sup>H NMR spectrum for 5g**

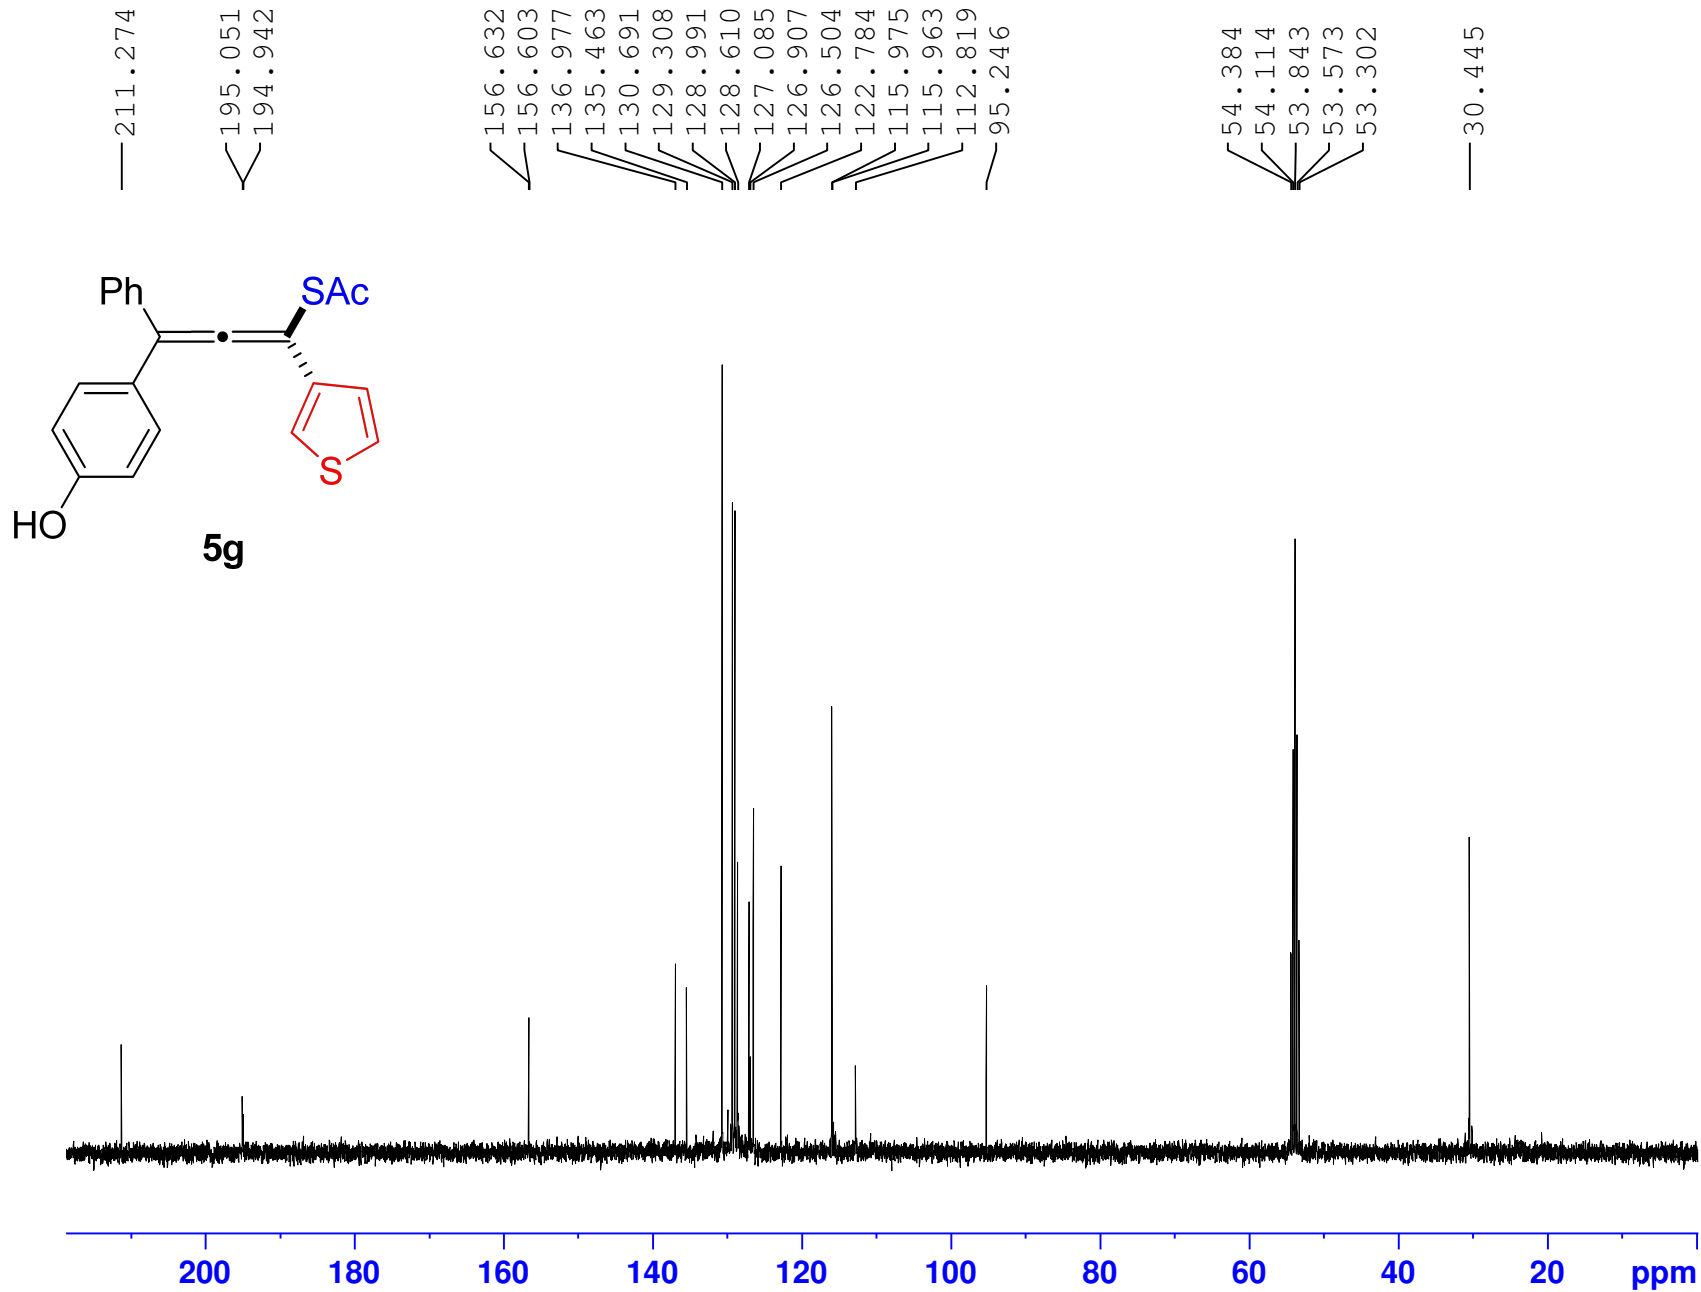

Current Data Parameters  
 NAME qdy-20115-1 C  
 EXPNO 2  
 PROCNO 1

F2 - Acquisition Parameters  
 Date\_ 20160414  
 Time 19.34  
 INSTRUM spect  
 PROBHD 5 mm PABBO BB/  
 PULPROG zgpg30  
 TD 65536  
 SOLVENT CD2C12  
 NS 102  
 DS 2  
 SWH 24038.461 Hz  
 FIDRES 0.366798 Hz  
 AQ 1.3631488 sec  
 RG 196.92  
 DW 20.800 usec  
 DE 6.50 usec  
 TE 297.6 K  
 D1 2.00000000 sec  
 D11 0.03000000 sec  
 TD0 1

==== CHANNEL f1 =====  
 SFO1 100.6228298 MHz  
 NUC1 13C  
 P1 9.70 usec  
 PLW1 46.98899841 W

==== CHANNEL f2 =====  
 SFO2 400.1316005 MHz  
 NUC2 1H  
 CPDPRG[2] waltz16  
 PCPD2 90.00 usec  
 PLW2 11.99499989 W  
 PLW12 0.34213999 W  
 PLW13 0.27713001 W

F2 - Processing parameters  
 SI 32768  
 SF 100.6127321 MHz  
 WDW EM  
 SSB 0  
 LB 1.00 Hz  
 GB 0  
 PC 1.40

**Supplementary Figure 120. <sup>13</sup>C NMR spectrum for 5g**

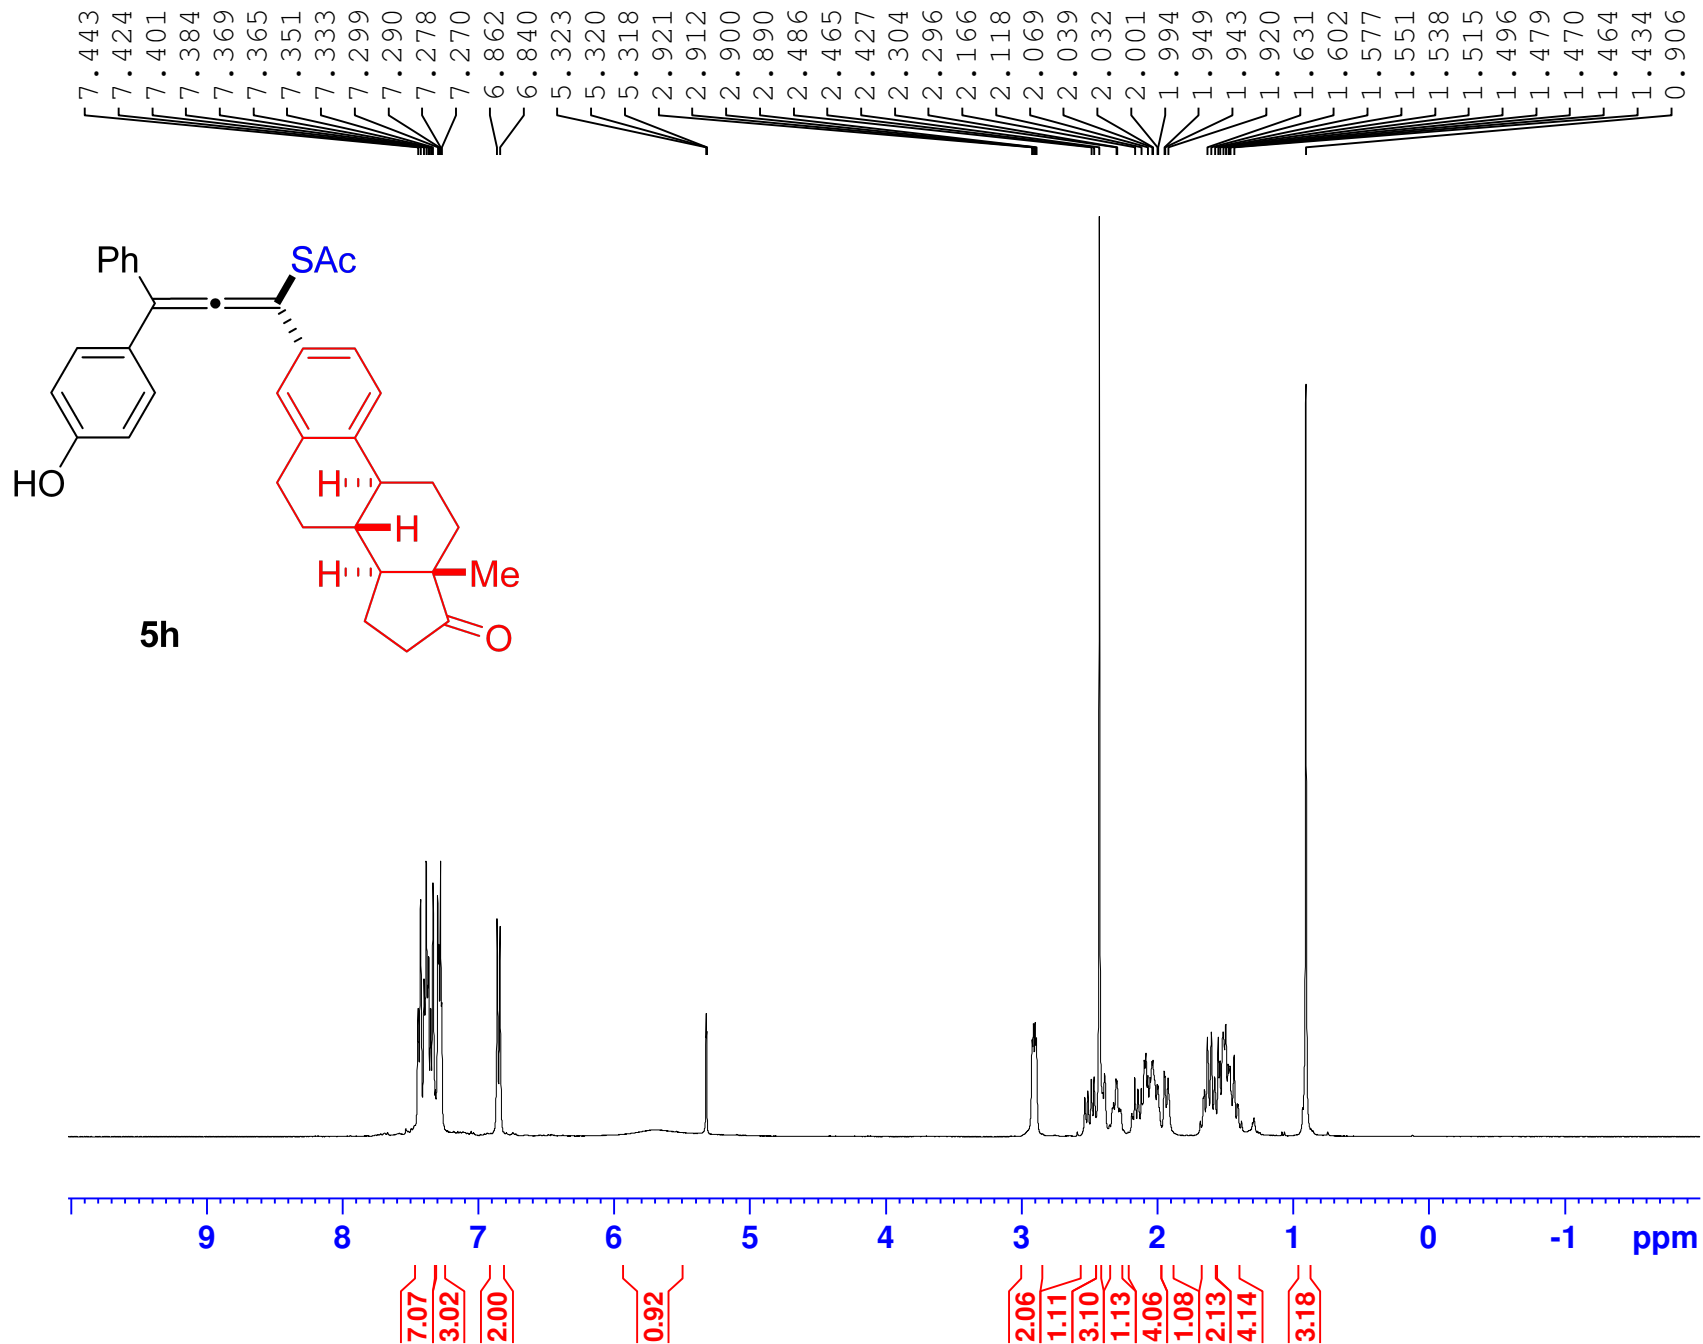

Current Data Parameters  
 NAME qdy-20117-3 H  
 EXPNO 1  
 PROCNO 1

F2 - Acquisition Parameters  
 Date\_ 20160421  
 Time 19.07  
 INSTRUM spect  
 PROBHD 5 mm PABBO BB/  
 PULPROG zg30  
 TD 65536  
 SOLVENT CD2C12  
 NS 6  
 DS 0  
 SWH 8012.820 Hz  
 FIDRES 0.122266 Hz  
 AQ 4.0894465 sec  
 RG 54.81  
 DW 62.400 usec  
 DE 6.50 usec  
 TE 297.2 K  
 D1 1.00000000 sec  
 TD0 1

==== CHANNEL f1 =====  
 SFO1 400.1324710 MHz  
 NUC1 1H  
 P1 14.50 usec  
 PLW1 11.99499989 W

F2 - Processing parameters  
 SI 65536  
 SF 400.1300151 MHz  
 WDW EM  
 SSB 0  
 LB 0.30 Hz  
 GB 0  
 PC 1.00

Supplementary Figure 121. <sup>1</sup>H NMR spectrum for 5h

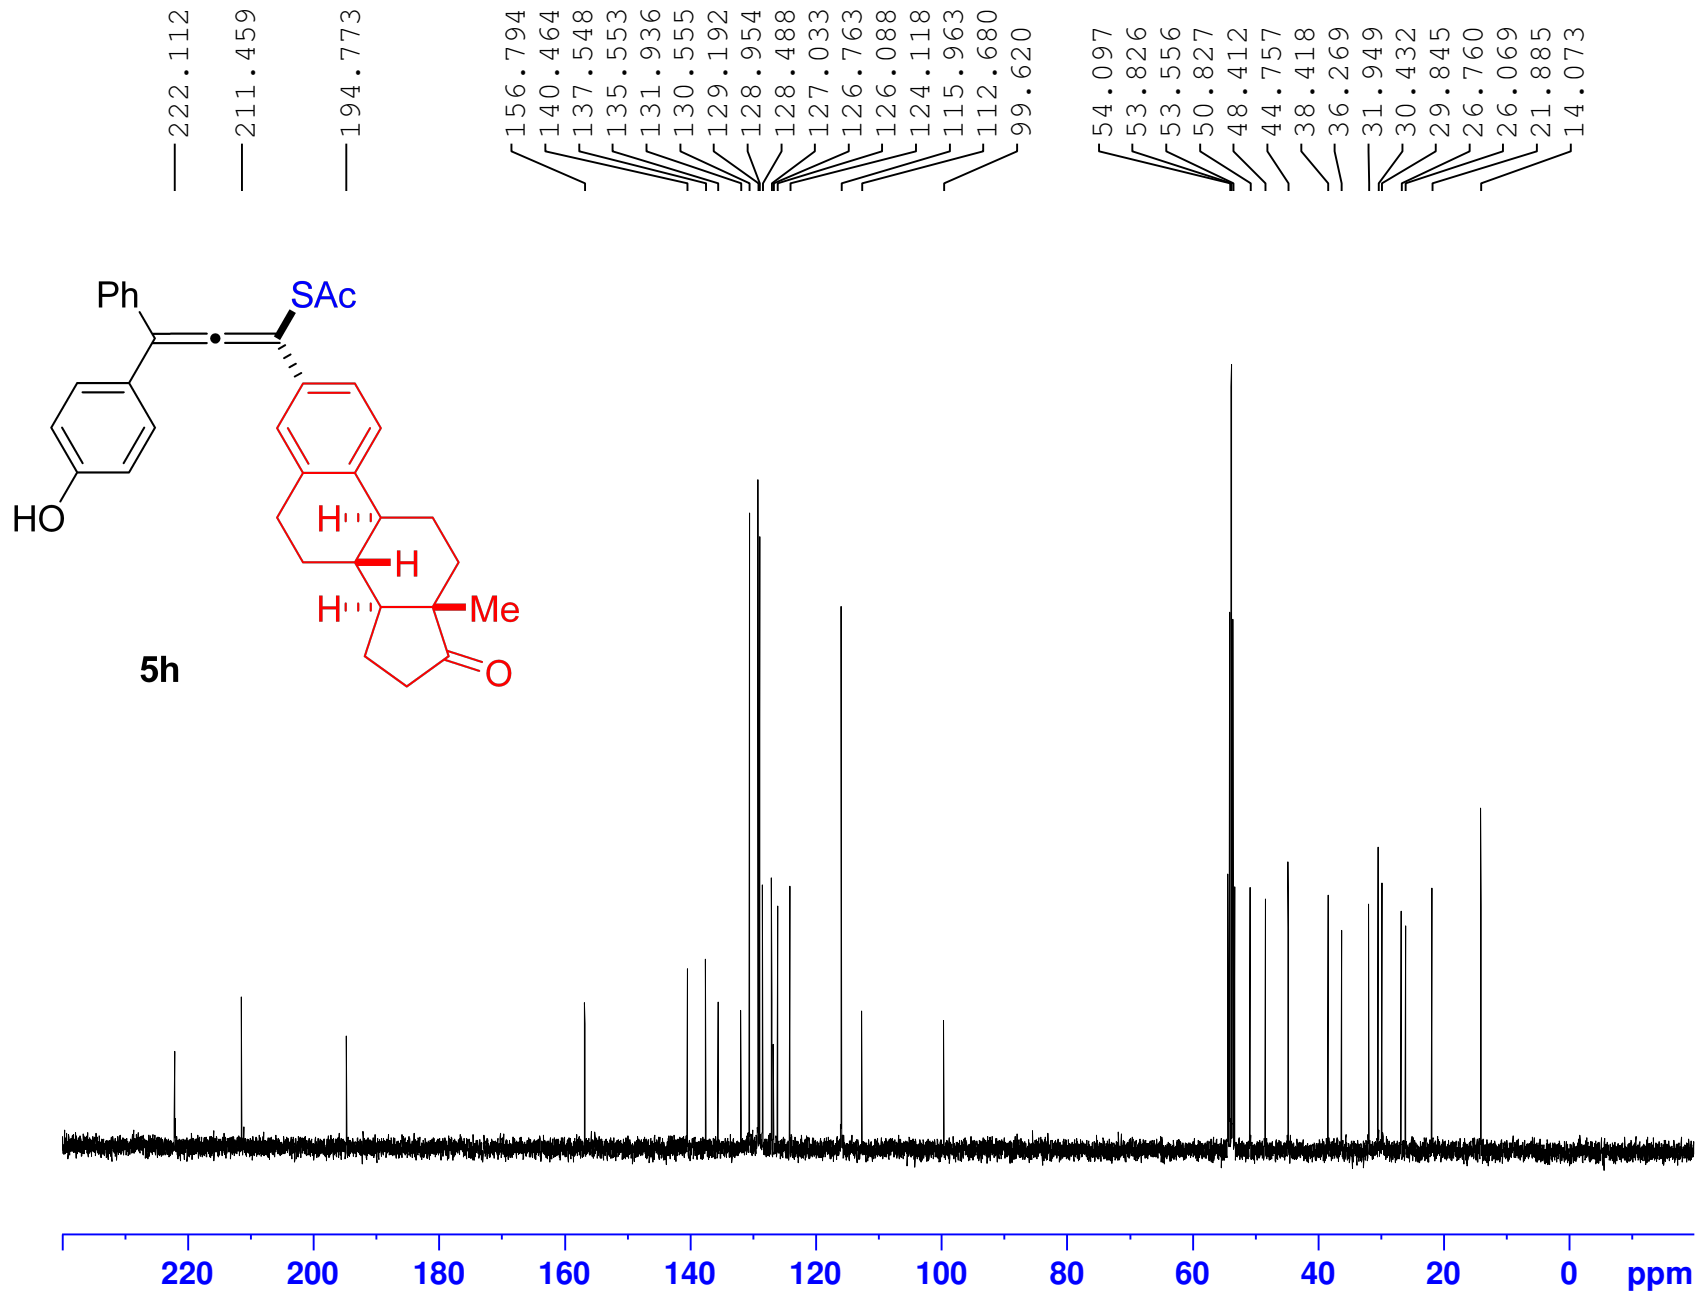

Current Data Parameters  
 NAME qdy-20117-3 C  
 EXPNO 1  
 PROCNO 1

F2 - Acquisition Parameters  
 Date\_ 20160420  
 Time 19.42  
 INSTRUM spect  
 PROBHD 5 mm PABBO BB/  
 PULPROG zgpg30  
 TD 65536  
 SOLVENT CD2Cl2  
 NS 194  
 DS 2  
 SWH 29761.904 Hz  
 FIDRES 0.454131 Hz  
 AQ 1.1010048 sec  
 RG 196.92  
 DW 16.800 usec  
 DE 6.50 usec  
 TE 297.6 K  
 D1 2.00000000 sec  
 D11 0.03000000 sec  
 TD0 1

==== CHANNEL f1 =====  
 SFO1 100.6228303 MHz  
 NUC1 13C  
 P1 9.70 usec  
 PLW1 46.98899841 W

==== CHANNEL f2 =====  
 SFO2 400.1316005 MHz  
 NUC2 1H  
 CPDPRG[2] waltz16  
 PCPD2 90.00 usec  
 PLW2 11.99499989 W  
 PLW12 0.34213999 W  
 PLW13 0.27713001 W

F2 - Processing parameters  
 SI 32768  
 SF 100.6127317 MHz  
 WDW EM  
 SSB 0  
 LB 1.00 Hz  
 GB 0  
 PC 1.40

Supplementary Figure 122. <sup>13</sup>C NMR spectrum for 5h

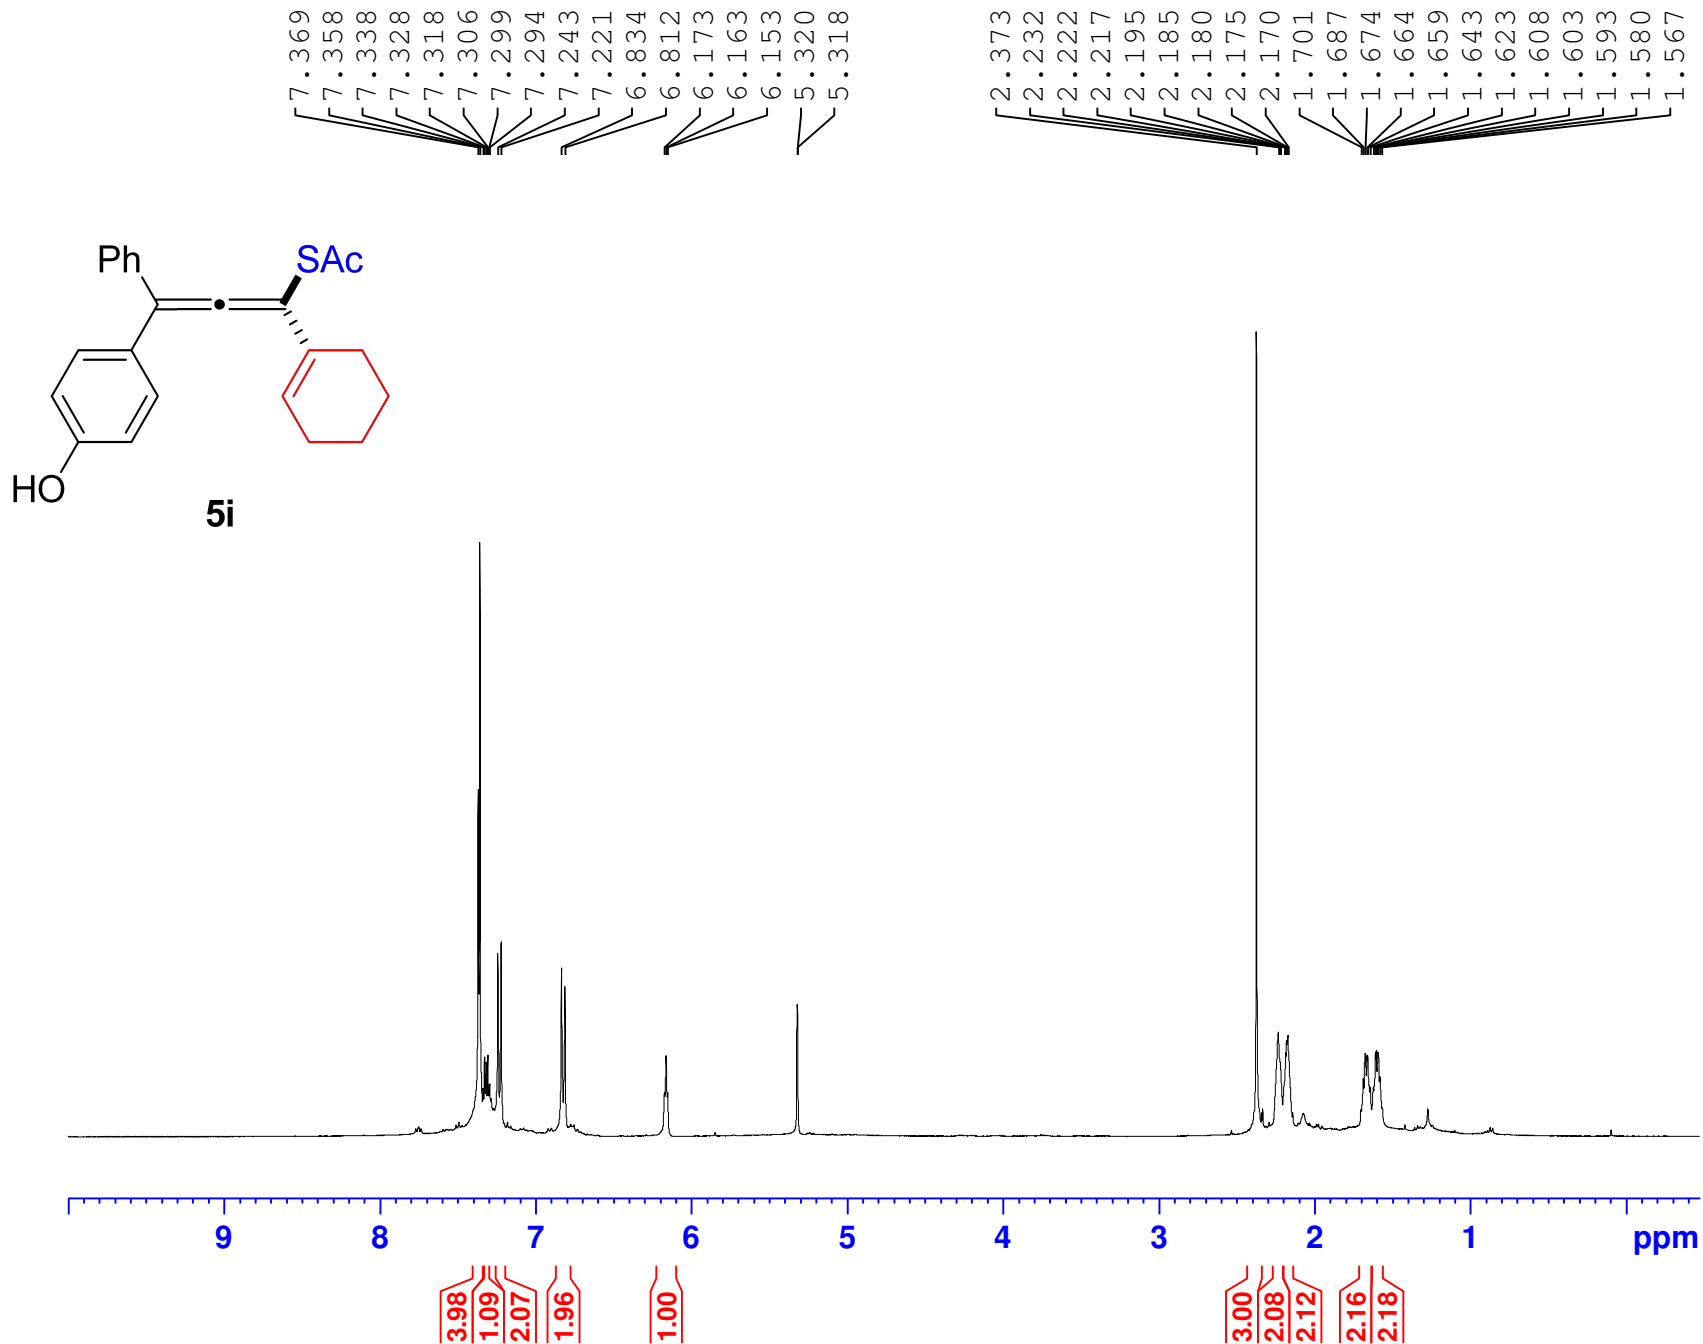

Current Data Parameters  
 NAME qdy-20133-2 H  
 EXPNO 1  
 PROCNO 1

F2 - Acquisition Parameters  
 Date\_ 20160504  
 Time 21.58  
 INSTRUM spect  
 PROBHD 5 mm PABBO BB/  
 PULPROG zg30  
 TD 65536  
 SOLVENT CD2C12  
 NS 9  
 DS 0  
 SWH 8012.820 Hz  
 FIDRES 0.122266 Hz  
 AQ 4.0894465 sec  
 RG 88.84  
 DW 62.400 usec  
 DE 6.50 usec  
 TE 296.9 K  
 D1 1.00000000 sec  
 TD0 1

==== CHANNEL f1 =====  
 SFO1 400.1324710 MHz  
 NUC1 1H  
 P1 14.50 usec  
 PLW1 11.99499989 W

F2 - Processing parameters  
 SI 65536  
 SF 400.1300152 MHz  
 WDW EM  
 SSB 0  
 LB 0.30 Hz  
 GB 0  
 PC 1.00

**Supplementary Figure 123. <sup>1</sup>H NMR spectrum for 5i**



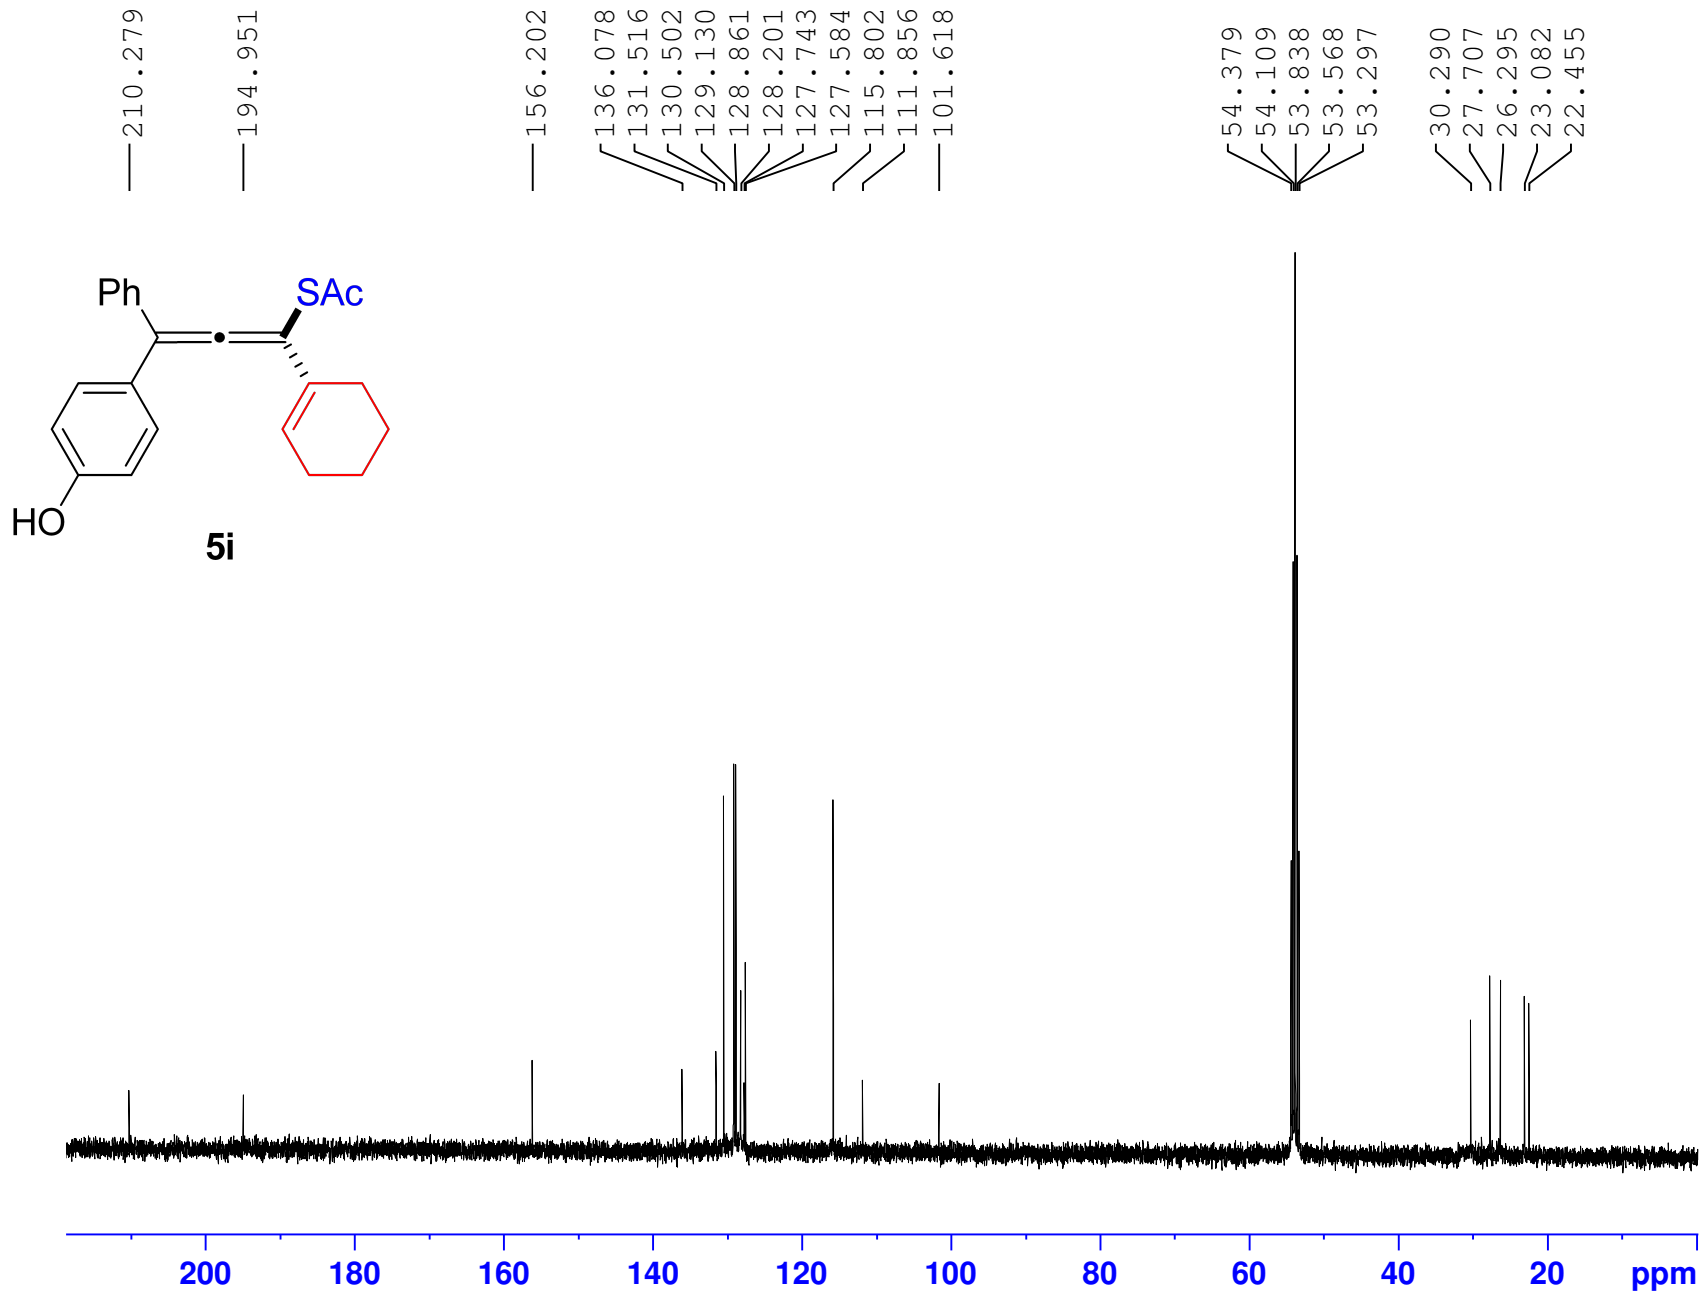

Current Data Parameters  
 NAME qdy-20133-2 C  
 EXPNO 2  
 PROCNO 1

F2 - Acquisition Parameters  
 Date\_ 20160504  
 Time 22.04  
 INSTRUM spect  
 PROBHD 5 mm PABBO BB/  
 PULPROG zgpg30  
 TD 65536  
 SOLVENT CD2C12  
 NS 279  
 DS 0  
 SWH 24038.461 Hz  
 FIDRES 0.366798 Hz  
 AQ 1.3631488 sec  
 RG 196.92  
 DW 20.800 usec  
 DE 6.50 usec  
 TE 298.1 K  
 D1 2.00000000 sec  
 D11 0.03000000 sec  
 TD0 1

==== CHANNEL f1 =====  
 SFO1 100.6228298 MHz  
 NUC1 13C  
 P1 9.70 usec  
 PLW1 46.98899841 W

==== CHANNEL f2 =====  
 SFO2 400.1316005 MHz  
 NUC2 1H  
 CPDPRG[2] waltz16  
 PCPD2 90.00 usec  
 PLW2 11.99499989 W  
 PLW12 0.34213999 W  
 PLW13 0.27713001 W

F2 - Processing parameters  
 SI 32768  
 SF 100.6127277 MHz  
 WDW EM  
 SSB 0  
 LB 1.00 Hz  
 GB 0  
 PC 1.40

Supplementary Figure 124. <sup>13</sup>C NMR spectrum for 5i

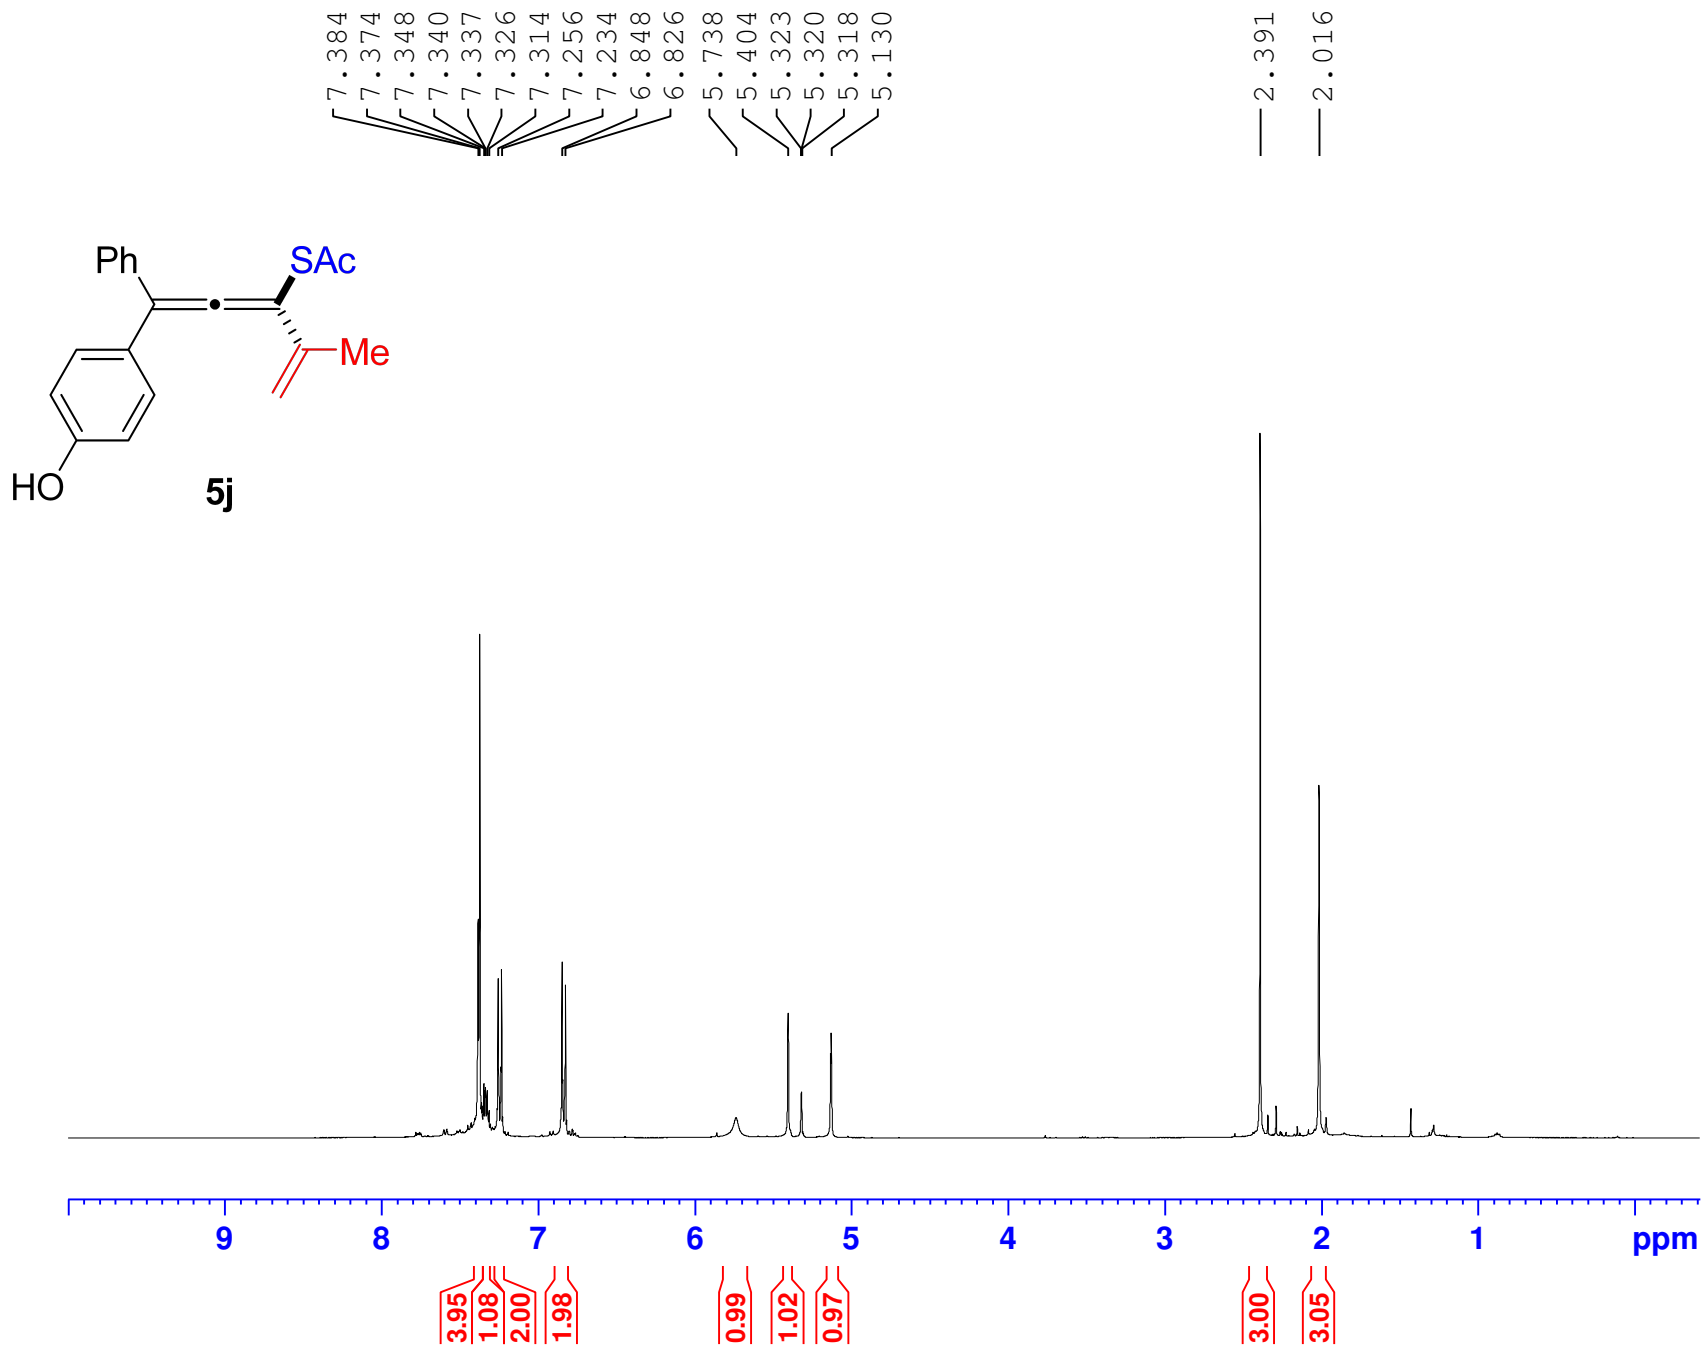

Current Data Parameters  
 NAME qdy-20115-2 H  
 EXPNO 4  
 PROCNO 1

F2 - Acquisition Parameters  
 Date\_ 20160416  
 Time 19.31  
 INSTRUM spect  
 PROBHD 5 mm PABBO BB/  
 PULPROG zg30  
 TD 65536  
 SOLVENT CD2C12  
 NS 11  
 DS 0  
 SWH 8012.820 Hz  
 FIDRES 0.122266 Hz  
 AQ 4.0894465 sec  
 RG 62.93  
 DW 62.400 usec  
 DE 6.50 usec  
 TE 298.5 K  
 D1 1.00000000 sec  
 TD0 1

==== CHANNEL f1 =====  
 SFO1 400.1324710 MHz  
 NUC1 1H  
 P1 14.50 usec  
 PLW1 11.99499989 W

F2 - Processing parameters  
 SI 65536  
 SF 400.1300151 MHz  
 WDW EM  
 SSB 0  
 LB 0.30 Hz  
 GB 0  
 PC 1.00

**Supplementary Figure 125. <sup>1</sup>H NMR spectrum for 5j**

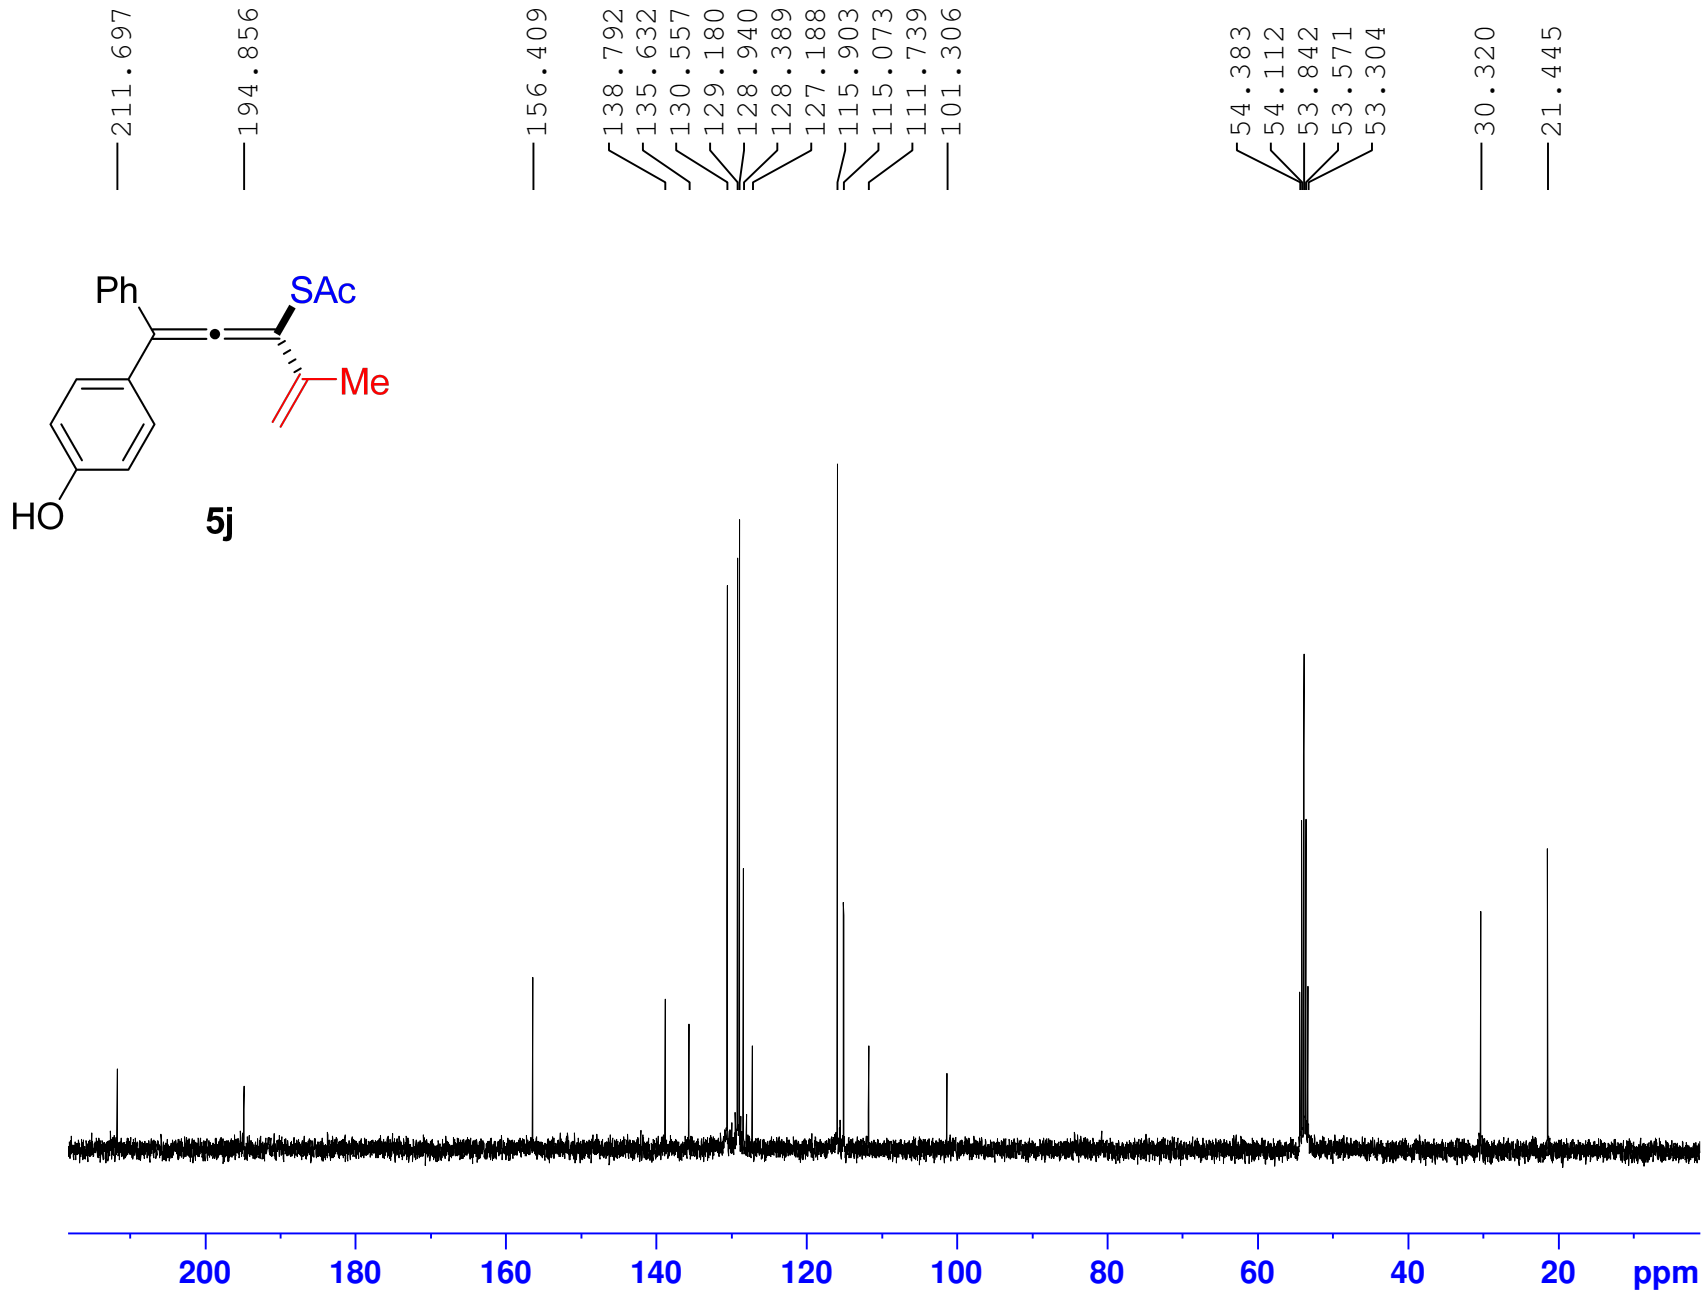

Current Data Parameters  
 NAME qdy-20115-2 C  
 EXPNO 1  
 PROCNO 1

F2 - Acquisition Parameters  
 Date\_ 20160414  
 Time 21.58  
 INSTRUM spect  
 PROBHD 5 mm PABBO BB/  
 PULPROG zgpg30  
 TD 65536  
 SOLVENT CD2C12  
 NS 150  
 DS 0  
 SWH 24038.461 Hz  
 FIDRES 0.366798 Hz  
 AQ 1.3631488 sec  
 RG 196.92  
 DW 20.800 usec  
 DE 6.50 usec  
 TE 298.6 K  
 D1 2.00000000 sec  
 D11 0.03000000 sec  
 TD0 1

==== CHANNEL f1 =====  
 SFO1 100.6228298 MHz  
 NUC1 13C  
 P1 9.70 usec  
 PLW1 46.98899841 W

==== CHANNEL f2 =====  
 SFO2 400.1316005 MHz  
 NUC2 1H  
 CPDPRG[2] waltz16  
 PCPD2 90.00 usec  
 PLW2 11.99499989 W  
 PLW12 0.34213999 W  
 PLW13 0.27713001 W

F2 - Processing parameters  
 SI 32768  
 SF 100.6127284 MHz  
 WDW EM  
 SSB 0  
 LB 1.00 Hz  
 GB 0  
 PC 1.40

Supplementary Figure 126. <sup>13</sup>C NMR spectrum for **5j**

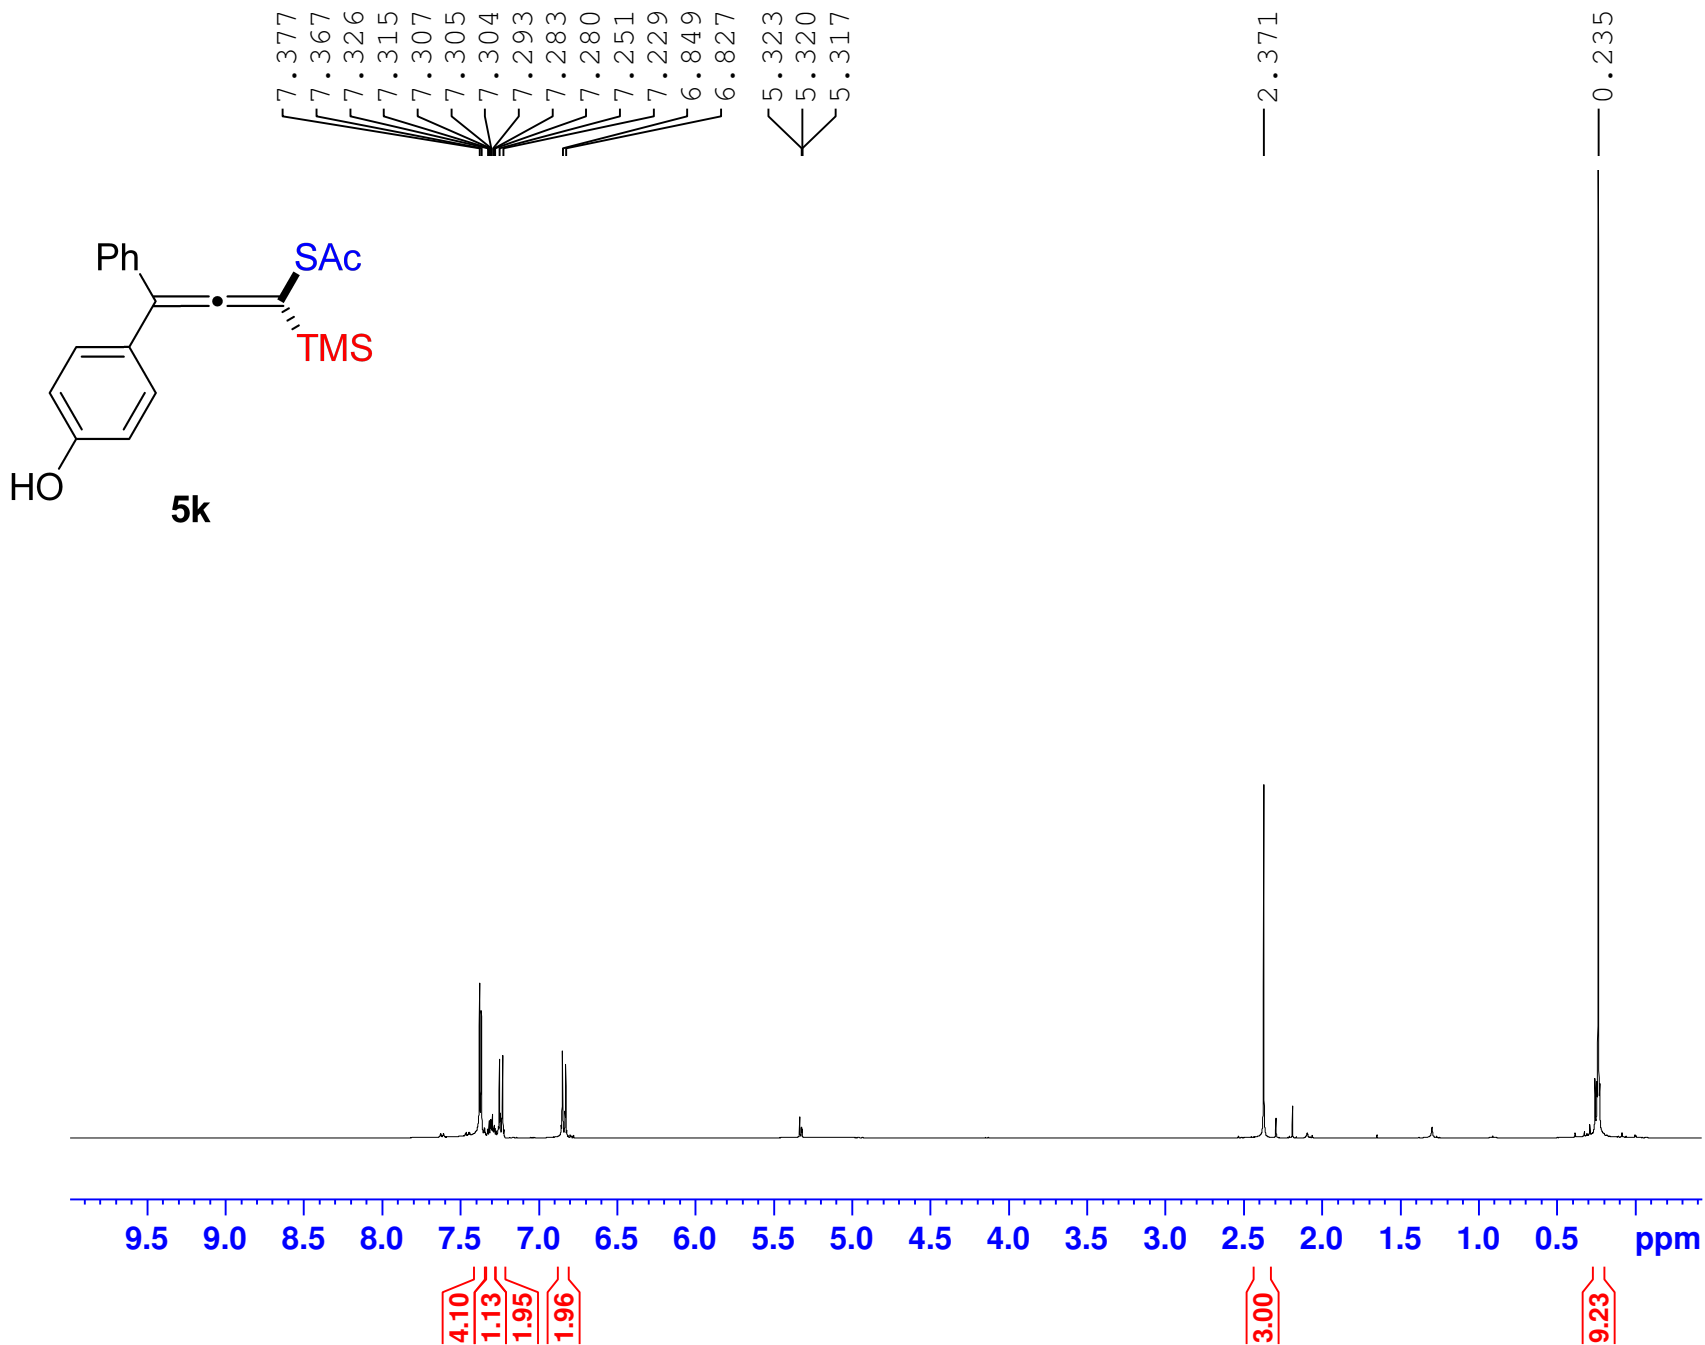

Current Data Parameters  
 NAME qdy-20099-5 H  
 EXPNO 1  
 PROCNO 1

F2 - Acquisition Parameters  
 Date\_ 20160401  
 Time 16.57  
 INSTRUM spect  
 PROBHD 5 mm PABBO BB/  
 PULPROG zg30  
 TD 65536  
 SOLVENT CD2C12  
 NS 7  
 DS 0  
 SWH 8012.820 Hz  
 FIDRES 0.122266 Hz  
 AQ 4.0894465 sec  
 RG 31.55  
 DW 62.400 usec  
 DE 6.50 usec  
 TE 297.0 K  
 D1 1.00000000 sec  
 TD0 1

==== CHANNEL f1 =====  
 SFO1 400.1324710 MHz  
 NUC1 1H  
 P1 14.50 usec  
 PLW1 11.99499989 W

F2 - Processing parameters  
 SI 65536  
 SF 400.1300152 MHz  
 WDW EM  
 SSB 0  
 LB 0.30 Hz  
 GB 0  
 PC 1.00

Supplementary Figure 127. <sup>1</sup>H NMR spectrum for 5k

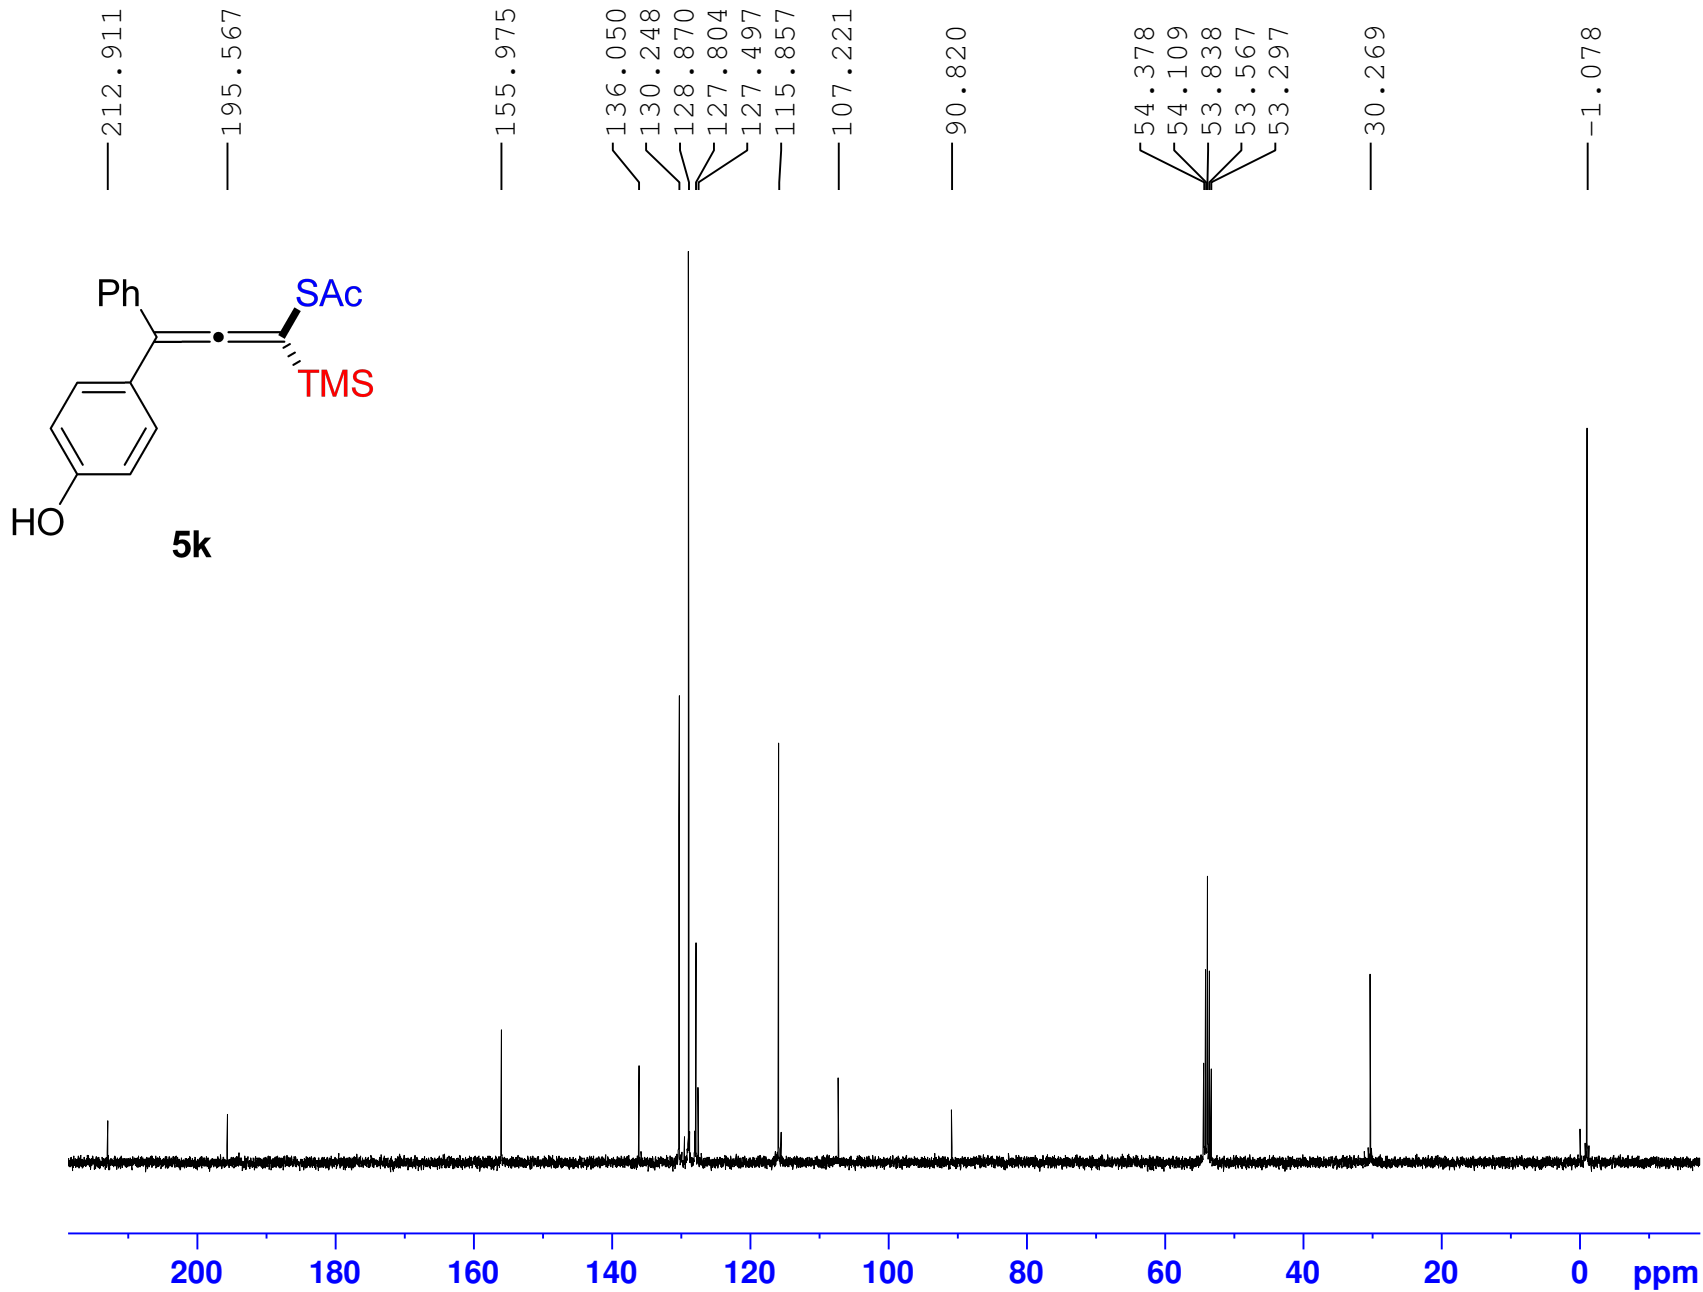

Current Data Parameters  
 NAME qdy-20099-5 C  
 EXPNO 1  
 PROCNO 1

F2 - Acquisition Parameters  
 Date\_ 20160401  
 Time 17.01  
 INSTRUM spect  
 PROBHD 5 mm PABBO BB/  
 PULPROG zgpg30  
 TD 65536  
 SOLVENT CD2C12  
 NS 66  
 DS 0  
 SWH 24038.461 Hz  
 FIDRES 0.366798 Hz  
 AQ 1.3631488 sec  
 RG 196.92  
 DW 20.800 usec  
 DE 6.50 usec  
 TE 298.0 K  
 D1 2.00000000 sec  
 D11 0.03000000 sec  
 TD0 1

==== CHANNEL f1 =====  
 SFO1 100.6228298 MHz  
 NUC1 13C  
 P1 9.70 usec  
 PLW1 46.98899841 W

==== CHANNEL f2 =====  
 SFO2 400.1316005 MHz  
 NUC2 1H  
 CPDPRG[2] waltz16  
 PCPD2 90.00 usec  
 PLW2 11.99499989 W  
 PLW12 0.34213999 W  
 PLW13 0.27713001 W

F2 - Processing parameters  
 SI 32768  
 SF 100.6127291 MHz  
 WDW EM  
 SSB 0  
 LB 1.00 Hz  
 GB 0  
 PC 1.40

Supplementary Figure 128. <sup>13</sup>C NMR spectrum for 5k

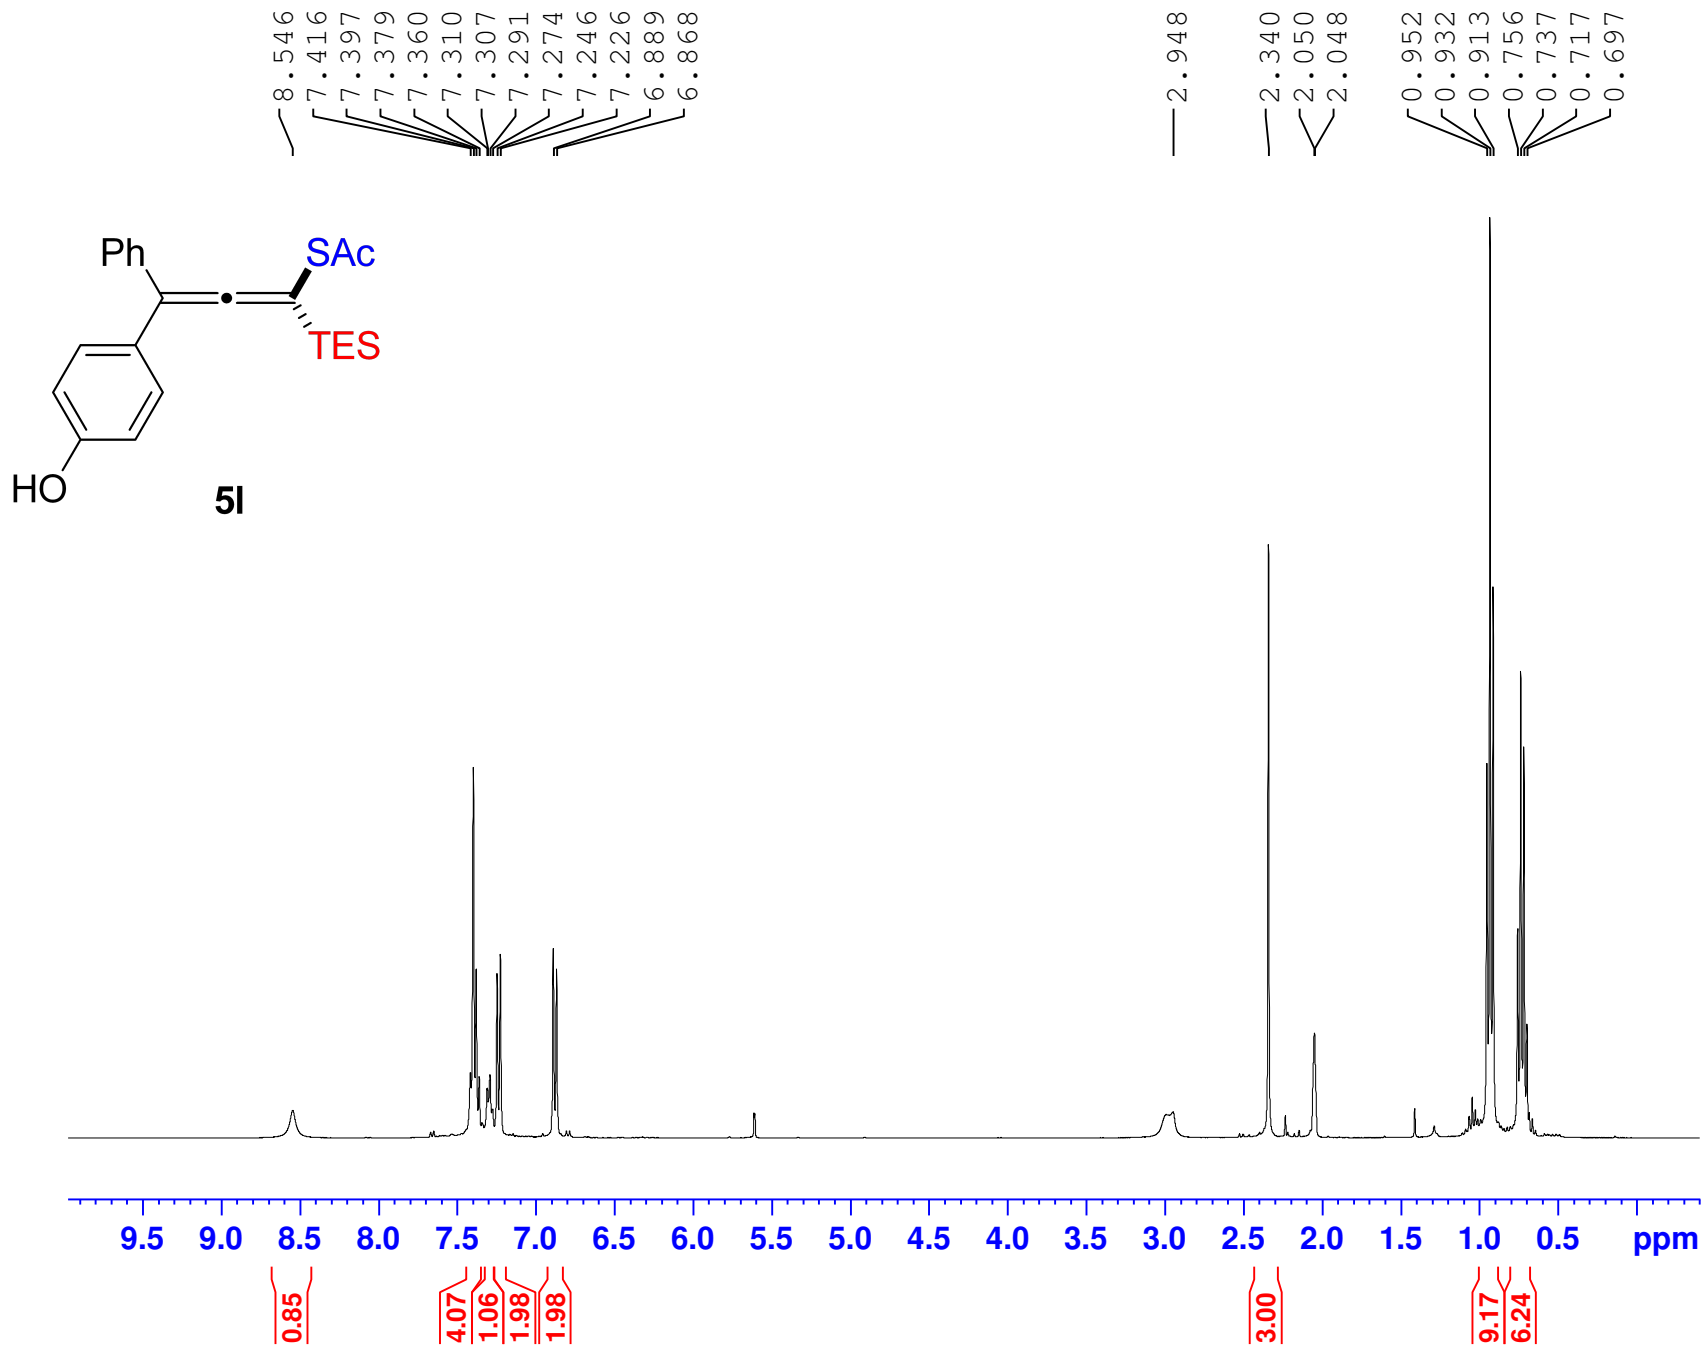

Current Data Parameters  
 NAME qdy-20102-2 H  
 EXPNO 1  
 PROCNO 1

F2 - Acquisition Parameters  
 Date\_ 20160401  
 Time 17.19  
 INSTRUM spect  
 PROBHD 5 mm PABBO BB/  
 PULPROG zg30  
 TD 65536  
 SOLVENT Acetone  
 NS 4  
 DS 0  
 SWH 8012.820 Hz  
 FIDRES 0.122266 Hz  
 AQ 4.0894465 sec  
 RG 39.46  
 DW 62.400 usec  
 DE 6.50 usec  
 TE 297.3 K  
 D1 1.00000000 sec  
 TD0 1

==== CHANNEL f1 =====  
 SFO1 400.1324710 MHz  
 NUC1 1H  
 P1 14.50 usec  
 PLW1 11.99499989 W

F2 - Processing parameters  
 SI 65536  
 SF 400.1300069 MHz  
 WDW EM  
 SSB 0  
 LB 0.30 Hz  
 GB 0  
 PC 1.00

Supplementary Figure 129. <sup>1</sup>H NMR spectrum for 5I

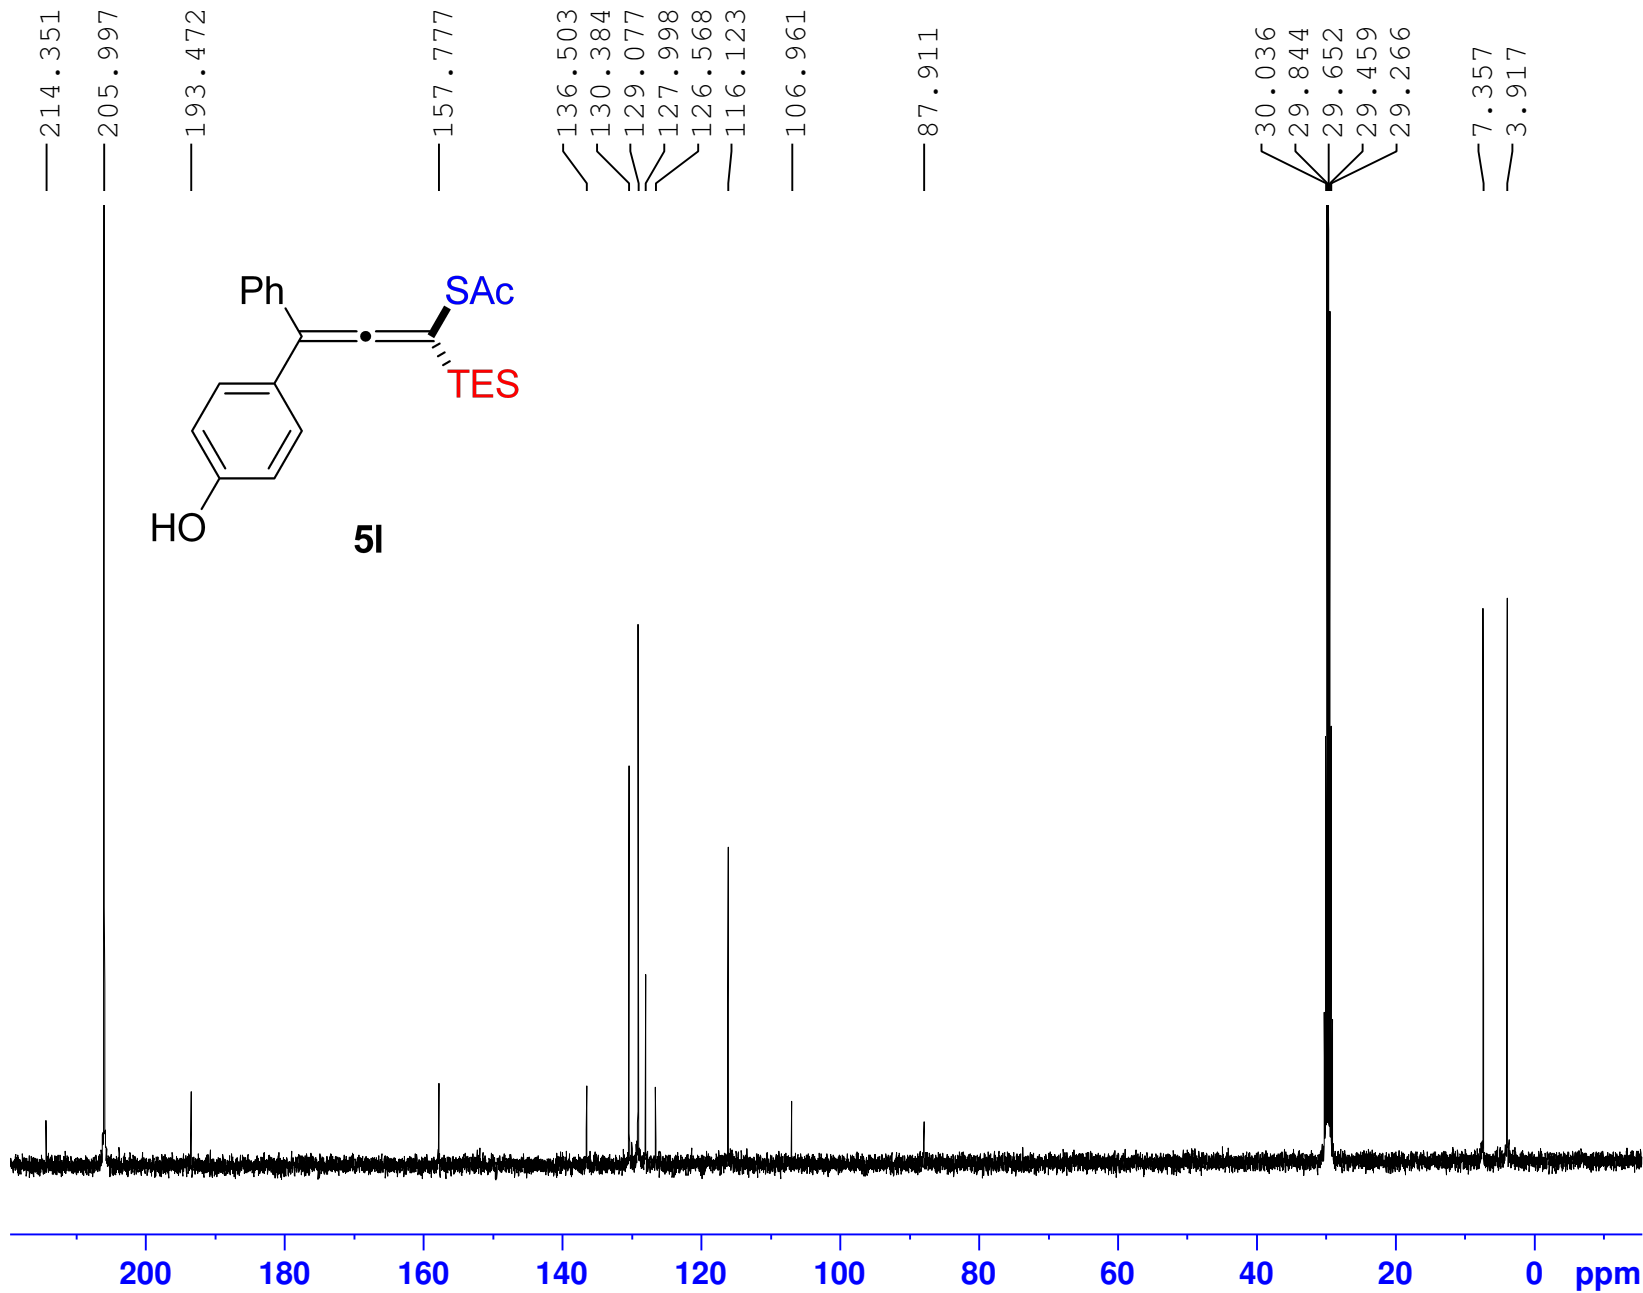

Current Data Parameters  
 NAME qdy-20102-2 C  
 EXPNO 3  
 PROCNO 1

F2 - Acquisition Parameters  
 Date\_ 20160402  
 Time 14.01  
 INSTRUM spect  
 PROBHD 5 mm PABBO BB/  
 PULPROG zgpg30  
 TD 65536  
 SOLVENT Acetone  
 NS 150  
 DS 0  
 SWH 24038.461 Hz  
 FIDRES 0.366798 Hz  
 AQ 1.3631488 sec  
 RG 196.92  
 DW 20.800 usec  
 DE 6.50 usec  
 TE 298.4 K  
 D1 2.00000000 sec  
 D11 0.03000000 sec  
 TD0 1

==== CHANNEL f1 =====  
 SFO1 100.6228298 MHz  
 NUC1 13C  
 P1 9.70 usec  
 PLW1 46.98899841 W

==== CHANNEL f2 =====  
 SFO2 400.1316005 MHz  
 NUC2 1H  
 CPDPRG[2] waltz16  
 PCPD2 90.00 usec  
 PLW2 11.99499989 W  
 PLW12 0.34213999 W  
 PLW13 0.27713001 W

F2 - Processing parameters  
 SI 32768  
 SF 100.6127007 MHz  
 WDW EM  
 SSB 0  
 LB 1.00 Hz  
 GB 0  
 PC 1.40

Supplementary Figure 130. <sup>13</sup>C NMR spectrum for 5I

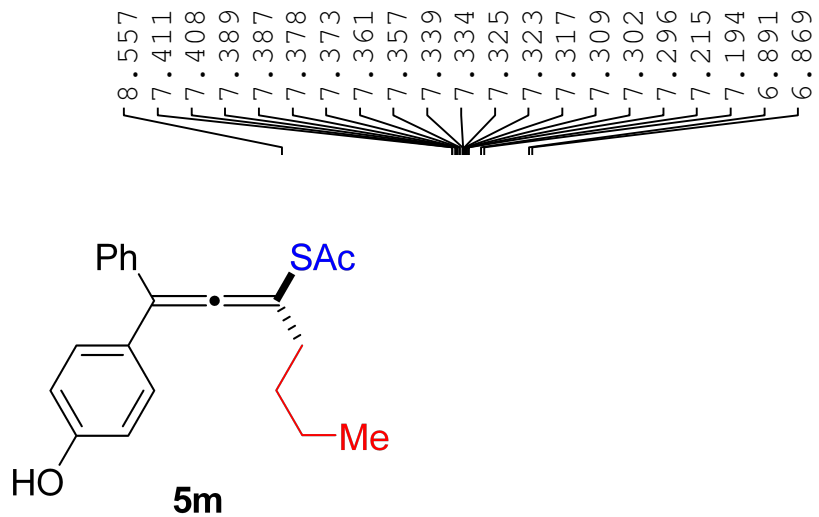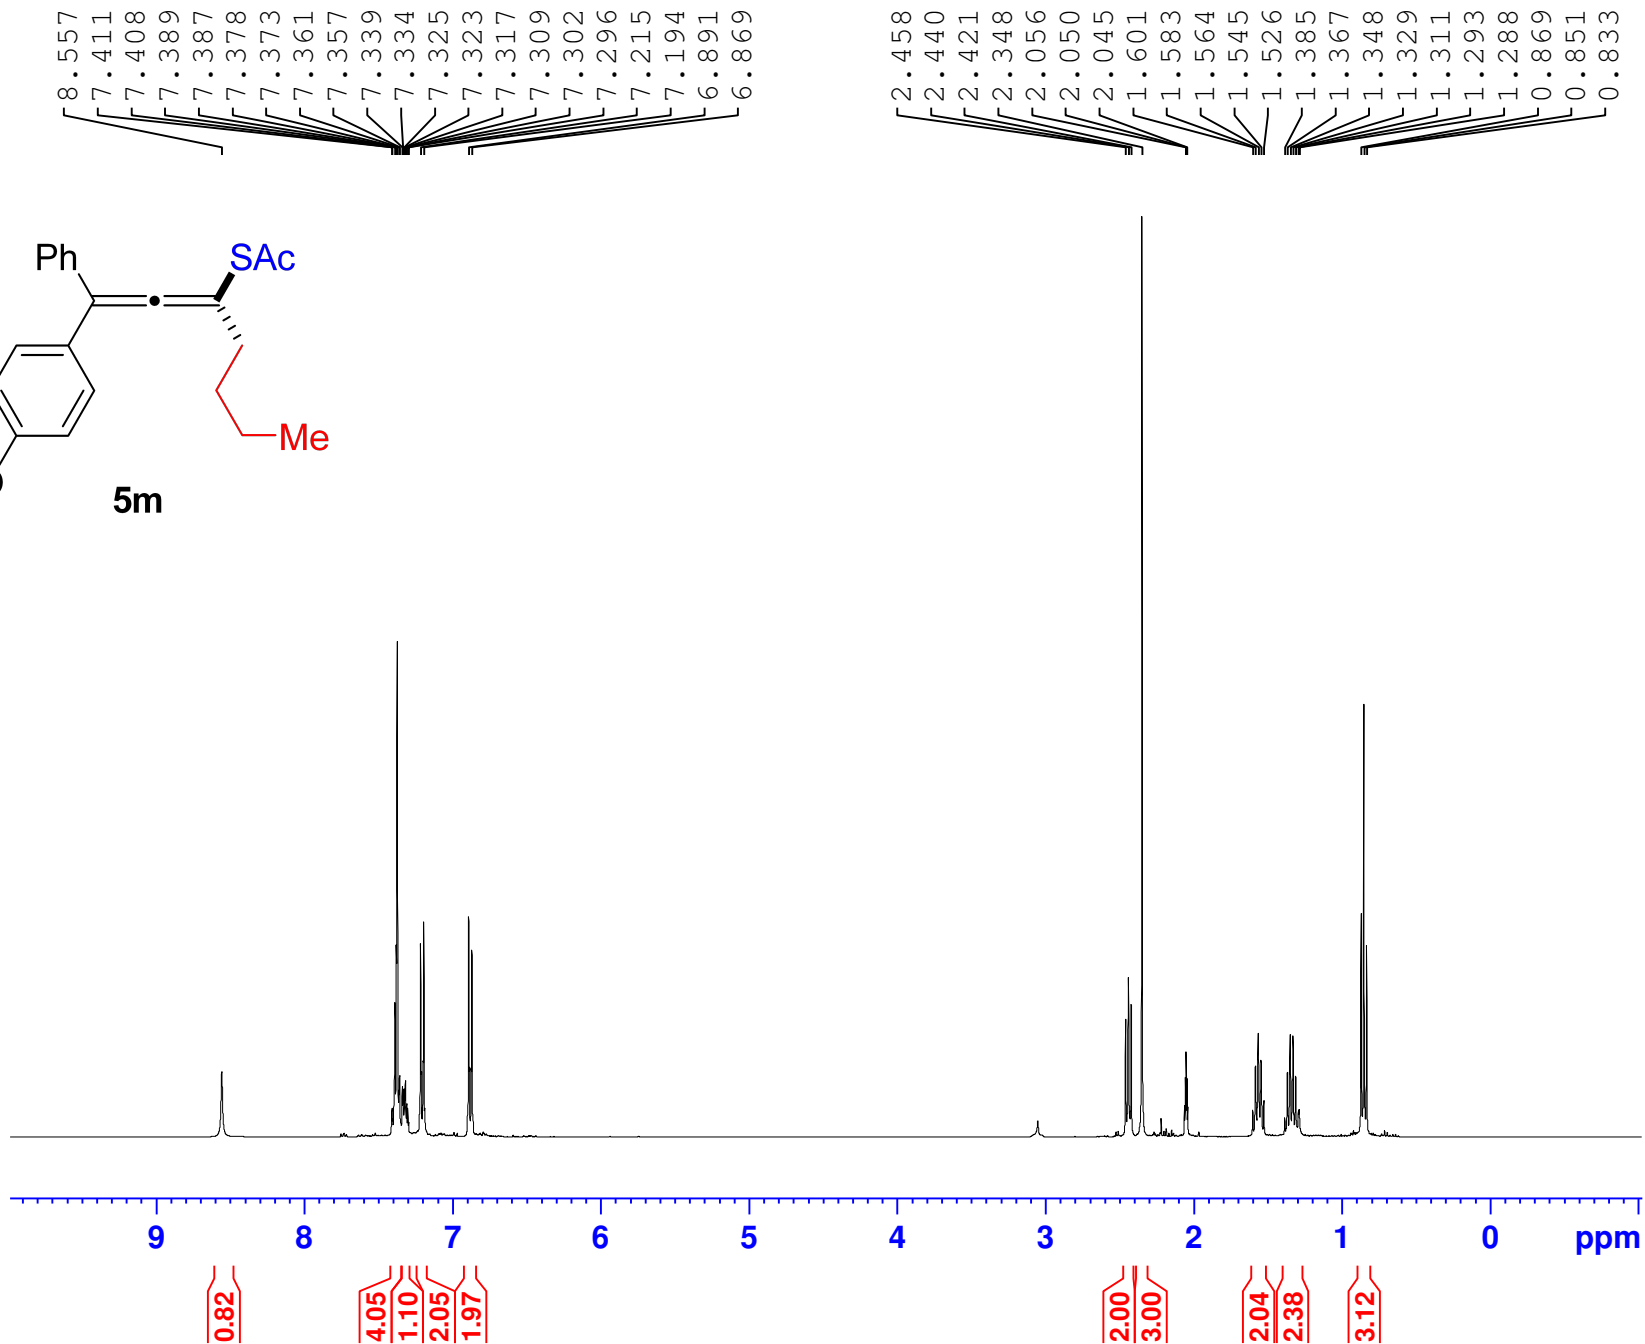

Current Data Parameters  
 NAME qdy-20099-3 H  
 EXPNO 3  
 PROCNO 1

F2 - Acquisition Parameters  
 Date\_ 20160331  
 Time 21.45  
 INSTRUM spect  
 PROBHD 5 mm PABBO BB/  
 PULPROG zg30  
 TD 65536  
 SOLVENT Acetone  
 NS 6  
 DS 0  
 SWH 8012.820 Hz  
 FIDRES 0.122266 Hz  
 AQ 4.0894465 sec  
 RG 34.77  
 DW 62.400 usec  
 DE 6.50 usec  
 TE 297.5 K  
 D1 1.00000000 sec  
 TD0 1

==== CHANNEL f1 =====  
 SFO1 400.1324710 MHz  
 NUC1 1H  
 P1 14.50 usec  
 PLW1 11.99499989 W

F2 - Processing parameters  
 SI 65536  
 SF 400.1300067 MHz  
 WDW EM  
 SSB 0  
 LB 0.30 Hz  
 GB 0  
 PC 1.00

Supplementary Figure 131. <sup>1</sup>H NMR spectrum for 5m



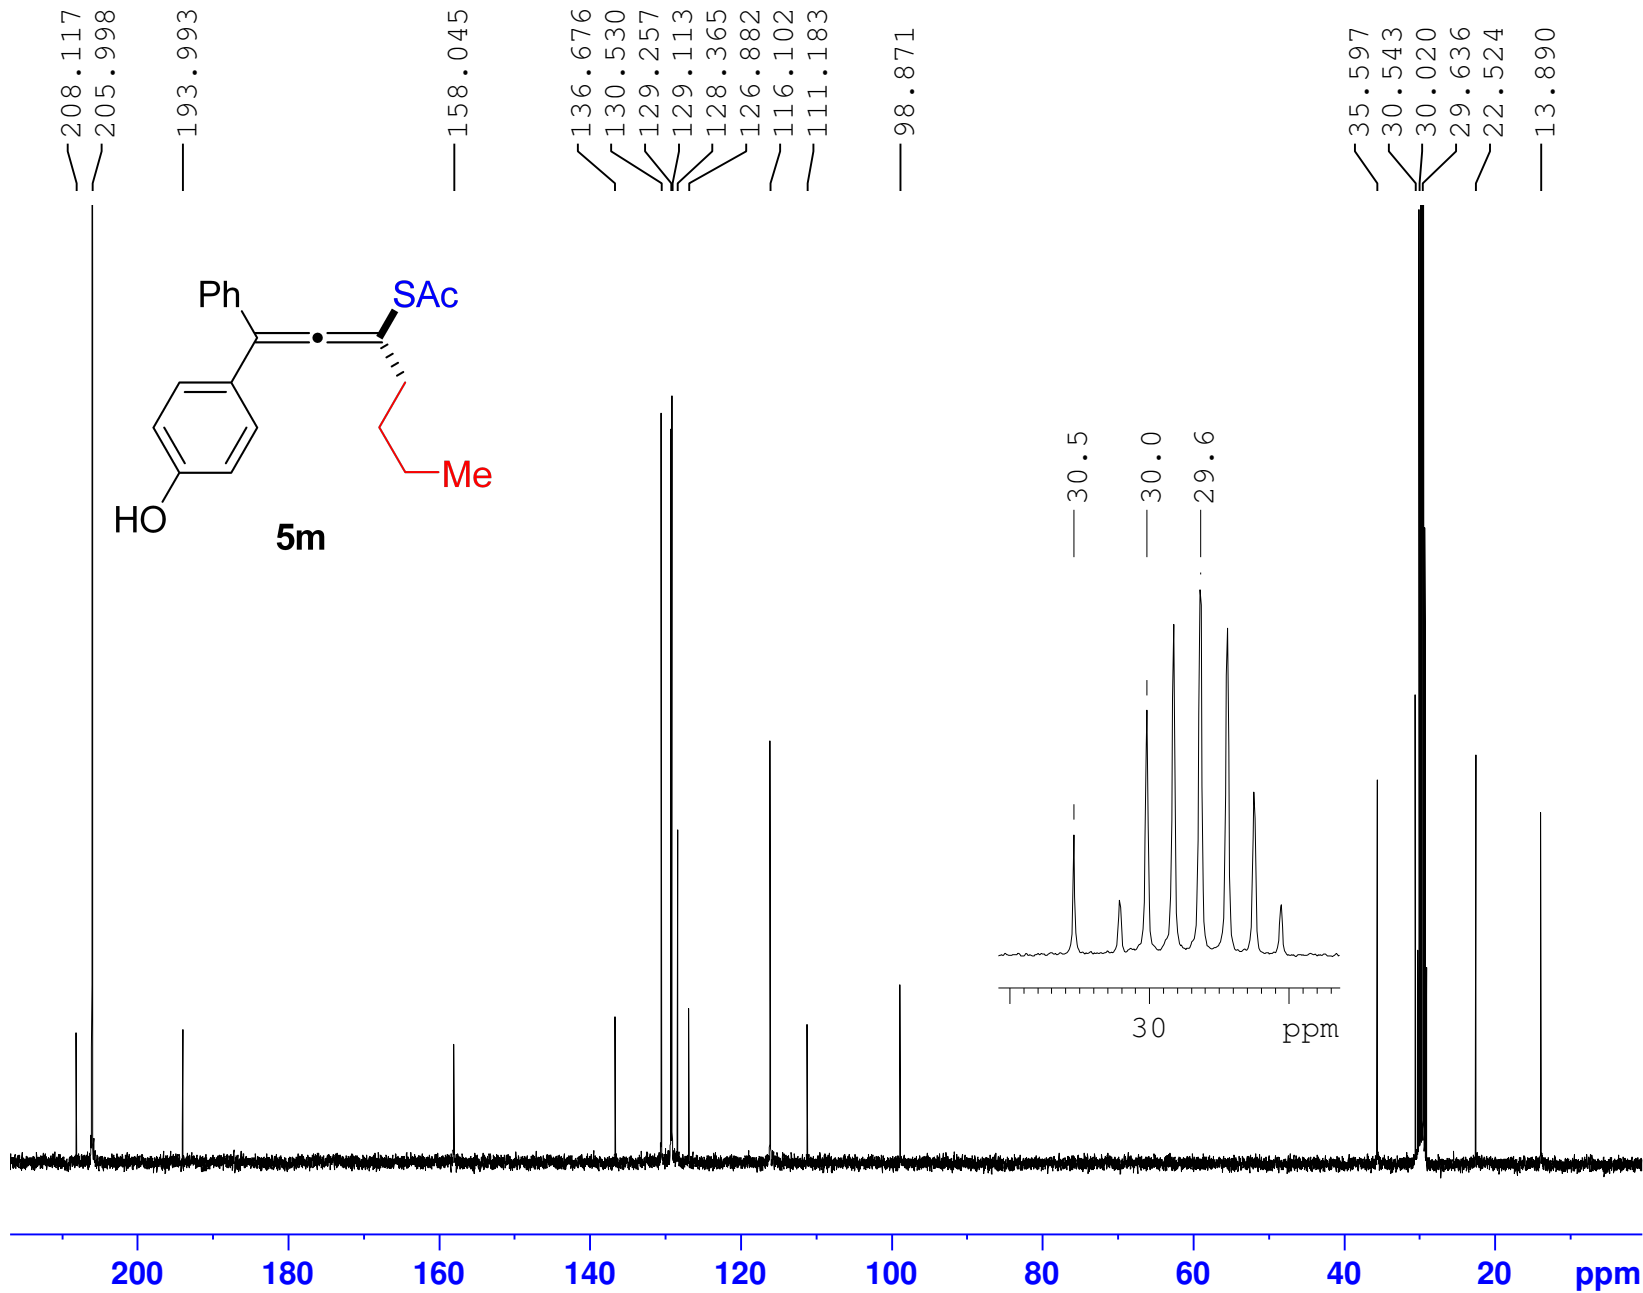

Current Data Parameters  
 NAME qdy-20099-3 C  
 EXPNO 3  
 PROCNO 1

F2 - Acquisition Parameters  
 Date\_ 20160331  
 Time 21.50  
 INSTRUM spect  
 PROBHD 5 mm PABBO BB/  
 PULPROG zgpg30  
 TD 65536  
 SOLVENT Acetone  
 NS 99  
 DS 0  
 SWH 24038.461 Hz  
 FIDRES 0.366798 Hz  
 AQ 1.3631488 sec  
 RG 196.92  
 DW 20.800 usec  
 DE 6.50 usec  
 TE 298.4 K  
 D1 2.00000000 sec  
 D11 0.03000000 sec  
 TD0 1

==== CHANNEL f1 =====  
 SFO1 100.6228298 MHz  
 NUC1 13C  
 P1 9.70 usec  
 PLW1 46.98899841 W

==== CHANNEL f2 =====  
 SFO2 400.1316005 MHz  
 NUC2 1H  
 CPDPRG[2] waltz16  
 PCPD2 90.00 usec  
 PLW2 11.99499989 W  
 PLW12 0.34213999 W  
 PLW13 0.27713001 W

F2 - Processing parameters  
 SI 32768  
 SF 100.6127044 MHz  
 WDW EM  
 SSB 0  
 LB 1.00 Hz  
 GB 0  
 PC 1.40

Supplementary Figure 132. <sup>13</sup>C NMR spectrum for 5m

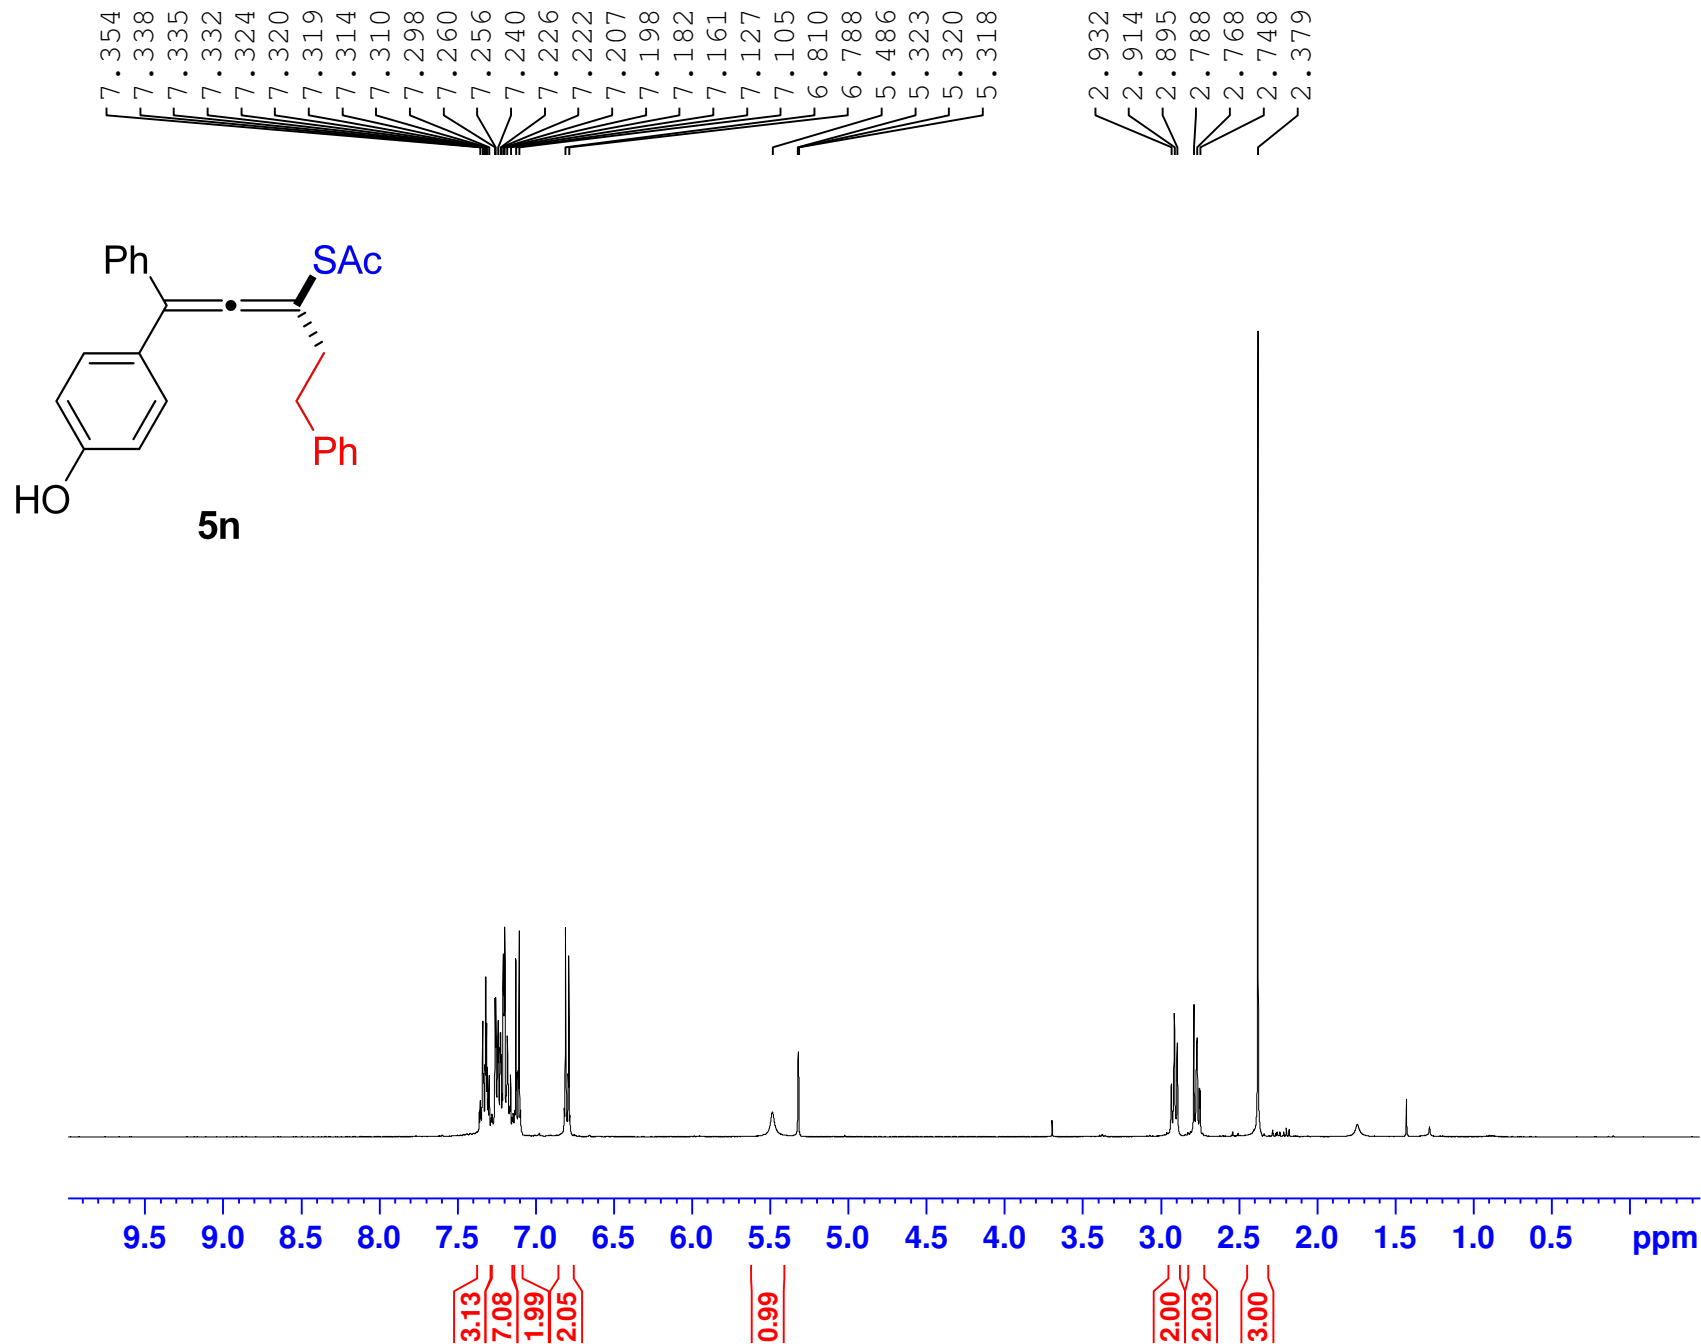

Current Data Parameters  
 NAME qdy-20118-2 H  
 EXPNO 2  
 PROCNO 1

F2 - Acquisition Parameters  
 Date\_ 20160418  
 Time 21.40  
 INSTRUM spect  
 PROBHD 5 mm PABBO BB/  
 PULPROG zg30  
 TD 65536  
 SOLVENT CD2C12  
 NS 4  
 DS 0  
 SWH 8012.820 Hz  
 FIDRES 0.122266 Hz  
 AQ 4.0894465 sec  
 RG 82.92  
 DW 62.400 usec  
 DE 6.50 usec  
 TE 296.9 K  
 D1 1.00000000 sec  
 TD0 1

==== CHANNEL f1 =====  
 SFO1 400.1324710 MHz  
 NUC1 1H  
 P1 14.50 usec  
 PLW1 11.99499989 W

F2 - Processing parameters  
 SI 65536  
 SF 400.1300152 MHz  
 WDW EM  
 SSB 0  
 LB 0.30 Hz  
 GB 0  
 PC 1.00

Supplementary Figure 133. <sup>1</sup>H NMR spectrum for 5n

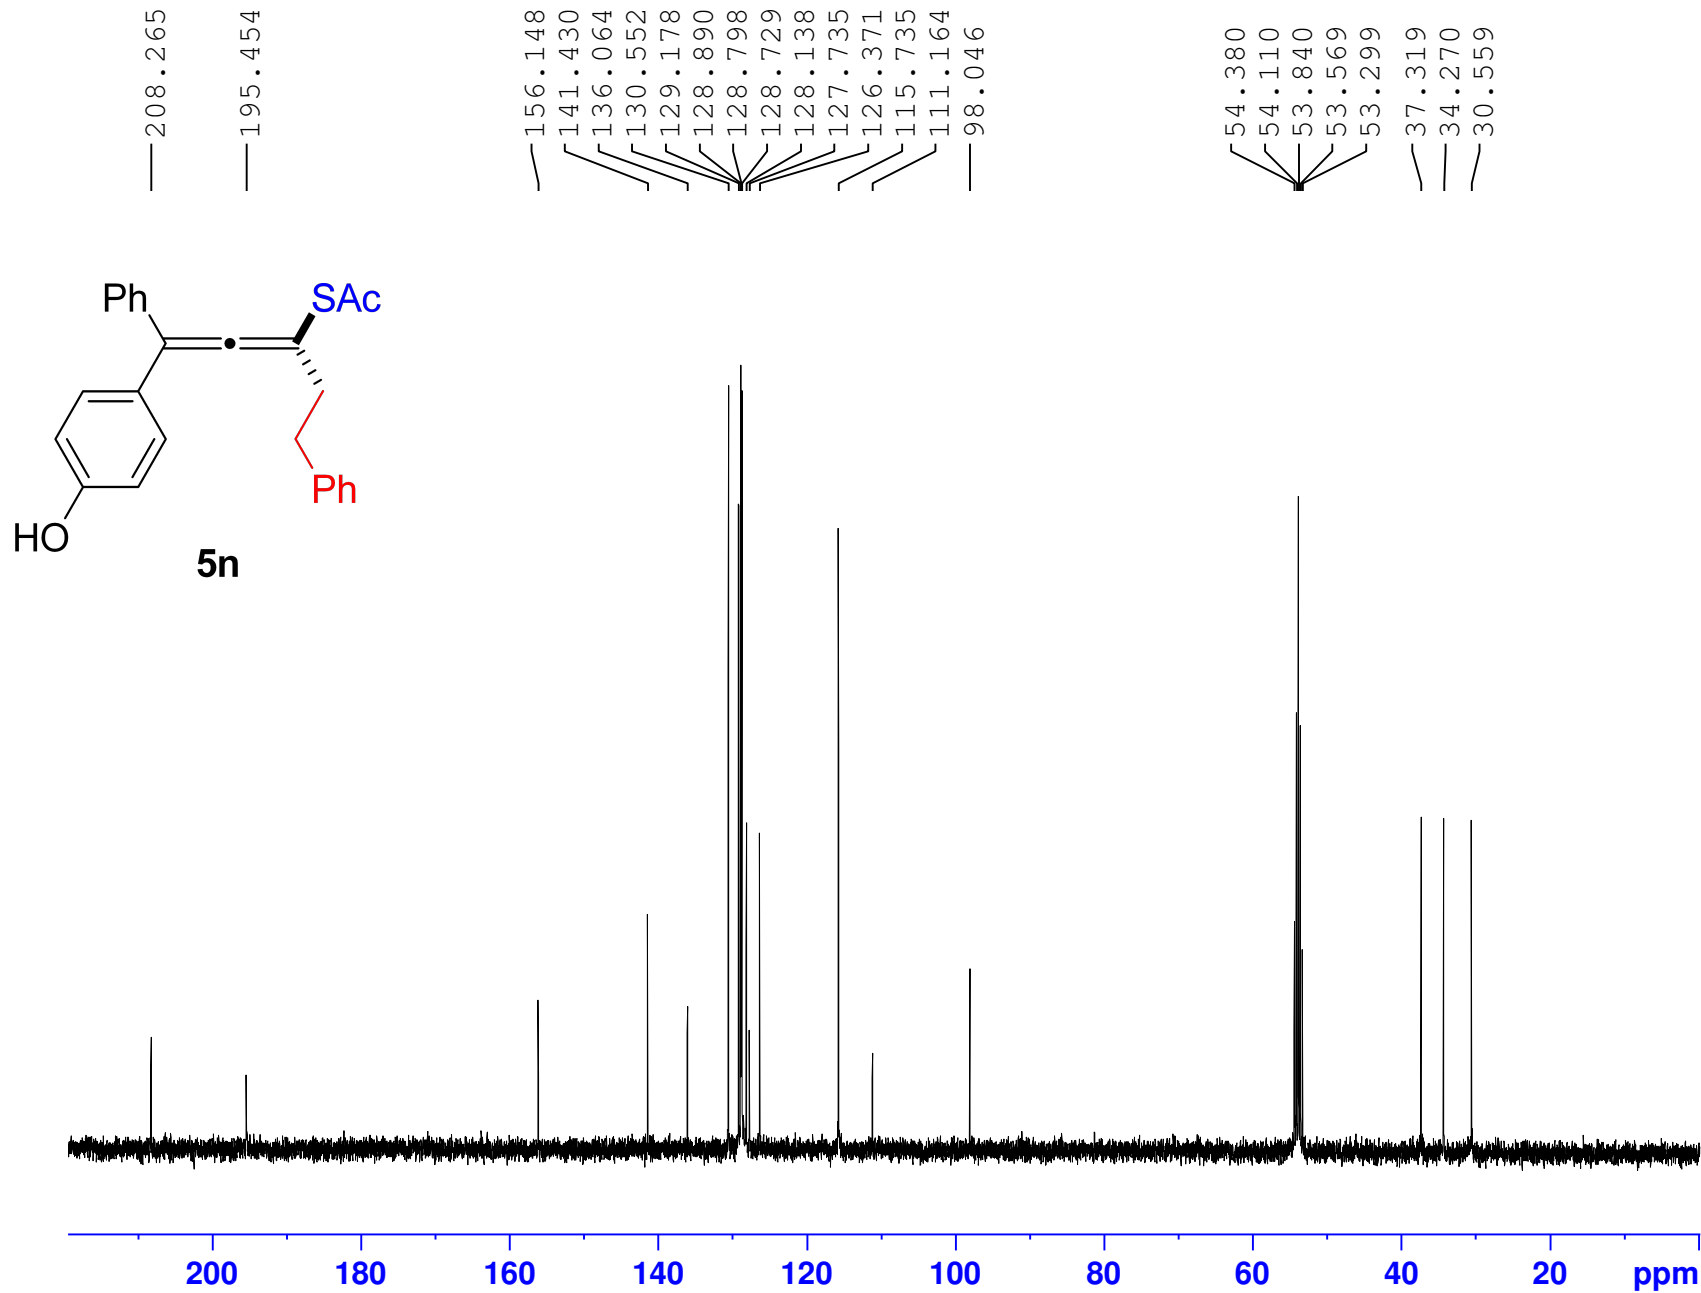

Current Data Parameters  
 NAME qdy-20118-2 C  
 EXPNO 1  
 PROCNO 1

F2 - Acquisition Parameters  
 Date\_ 20160418  
 Time 19.30  
 INSTRUM spect  
 PROBHD 5 mm PABBO BB/  
 PULPROG zgpg30  
 TD 65536  
 SOLVENT CD2C12  
 NS 151  
 DS 0  
 SWH 24038.461 Hz  
 FIDRES 0.366798 Hz  
 AQ 1.3631488 sec  
 RG 196.92  
 DW 20.800 usec  
 DE 6.50 usec  
 TE 297.4 K  
 D1 2.00000000 sec  
 D11 0.03000000 sec  
 TD0 1

==== CHANNEL f1 =====  
 SFO1 100.6228298 MHz  
 NUC1 13C  
 P1 9.70 usec  
 PLW1 46.98899841 W

==== CHANNEL f2 =====  
 SFO2 400.1316005 MHz  
 NUC2 1H  
 CPDPRG[2] waltz16  
 PCPD2 90.00 usec  
 PLW2 11.99499989 W  
 PLW12 0.34213999 W  
 PLW13 0.27713001 W

F2 - Processing parameters  
 SI 32768  
 SF 100.6127300 MHz  
 WDW EM  
 SSB 0  
 LB 1.00 Hz  
 GB 0  
 PC 1.40

Supplementary Figure 134. <sup>13</sup>C NMR spectrum for 5n

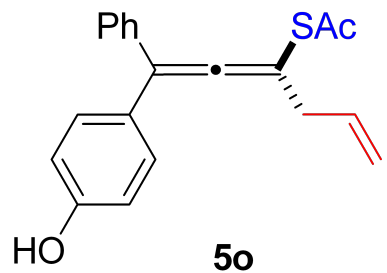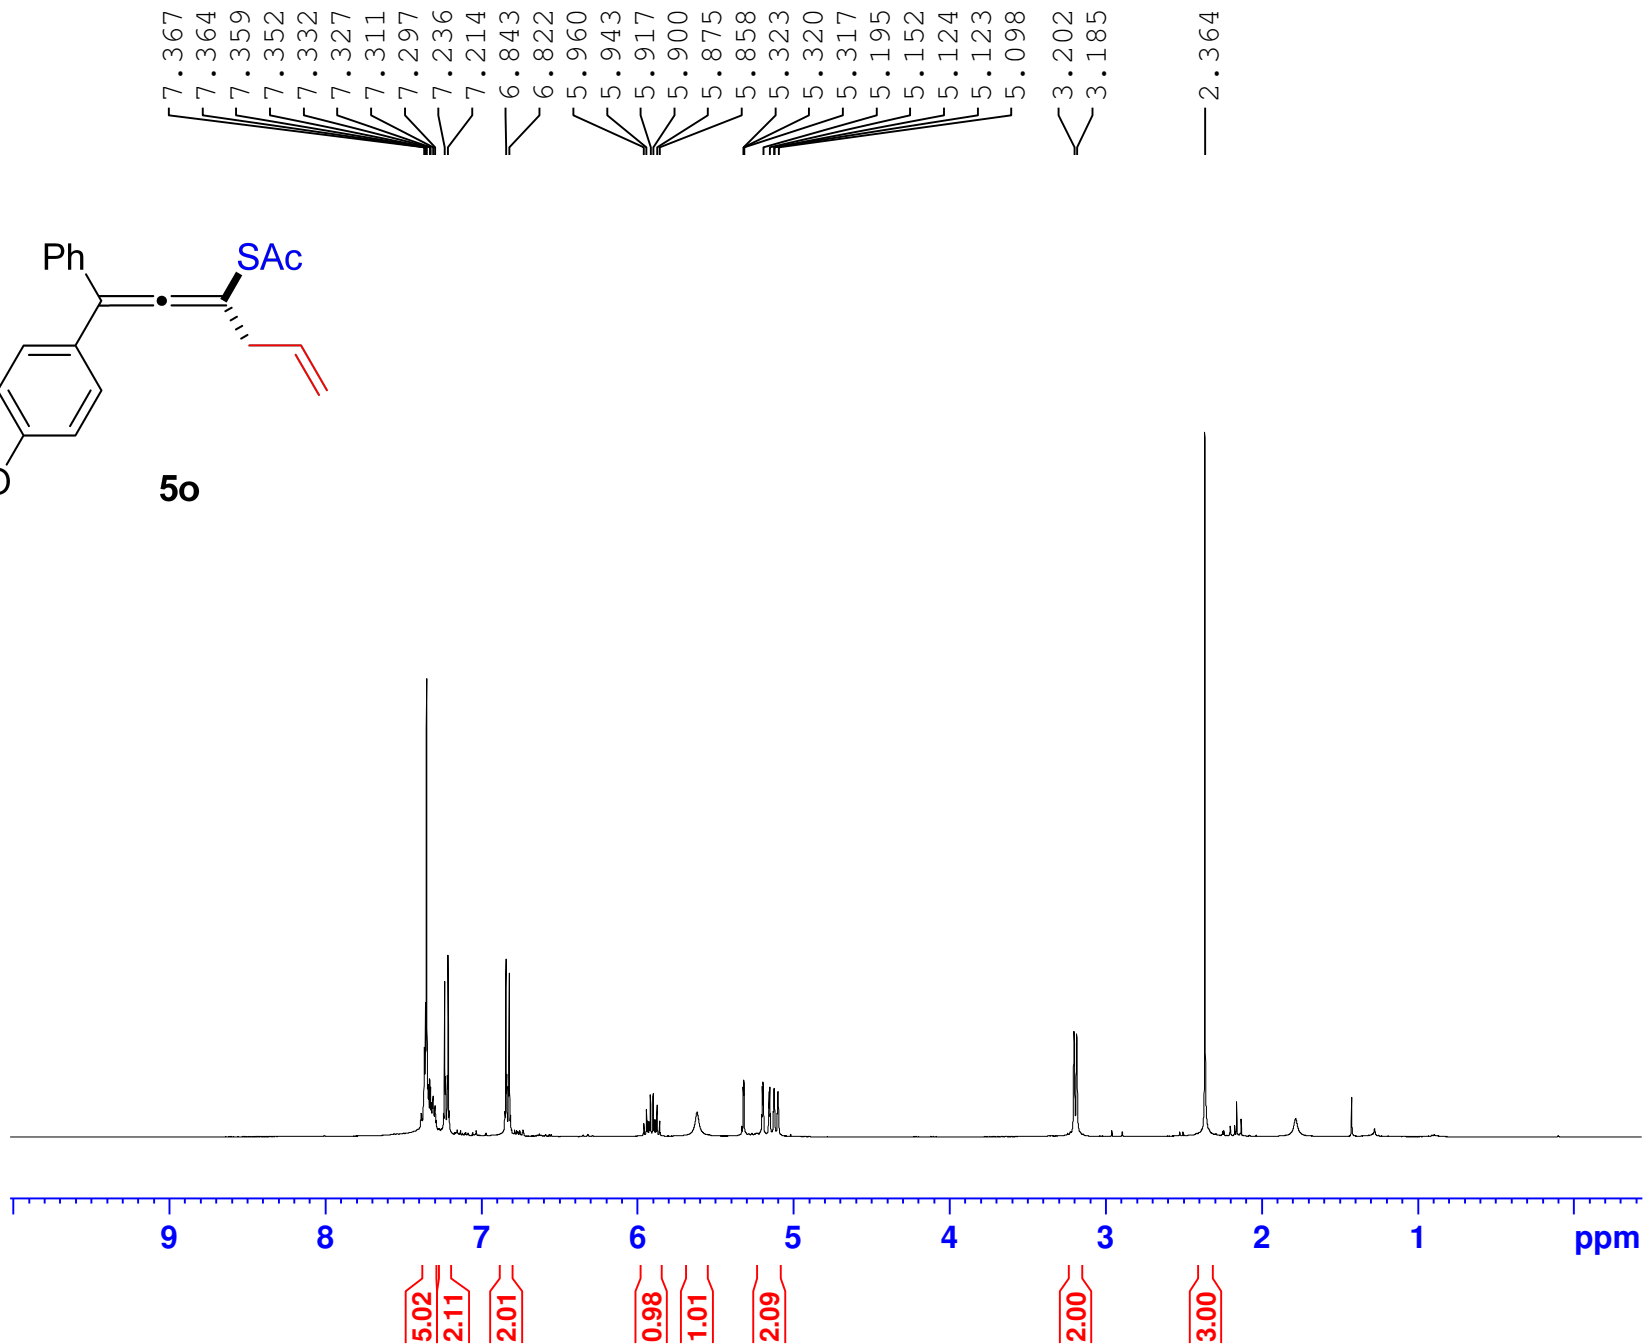

Current Data Parameters  
 NAME qdy-20118-1 H  
 EXPNO 1  
 PROCNO 1

F2 - Acquisition Parameters  
 Date\_ 20160416  
 Time 19.35  
 INSTRUM spect  
 PROBHD 5 mm PABBO BB/  
 PULPROG zg30  
 TD 65536  
 SOLVENT CD2C12  
 NS 7  
 DS 0  
 SWH 8012.820 Hz  
 FIDRES 0.122266 Hz  
 AQ 4.0894465 sec  
 RG 70.97  
 DW 62.400 usec  
 DE 6.50 usec  
 TE 298.5 K  
 D1 1.00000000 sec  
 TD0 1

==== CHANNEL f1 =====  
 SFO1 400.1324710 MHz  
 NUC1 1H  
 P1 14.50 usec  
 PLW1 11.99499989 W

F2 - Processing parameters  
 SI 65536  
 SF 400.1300153 MHz  
 WDW EM  
 SSB 0  
 LB 0.30 Hz  
 GB 0  
 PC 1.00

**Supplementary Figure 135. <sup>1</sup>H NMR spectrum for 50**

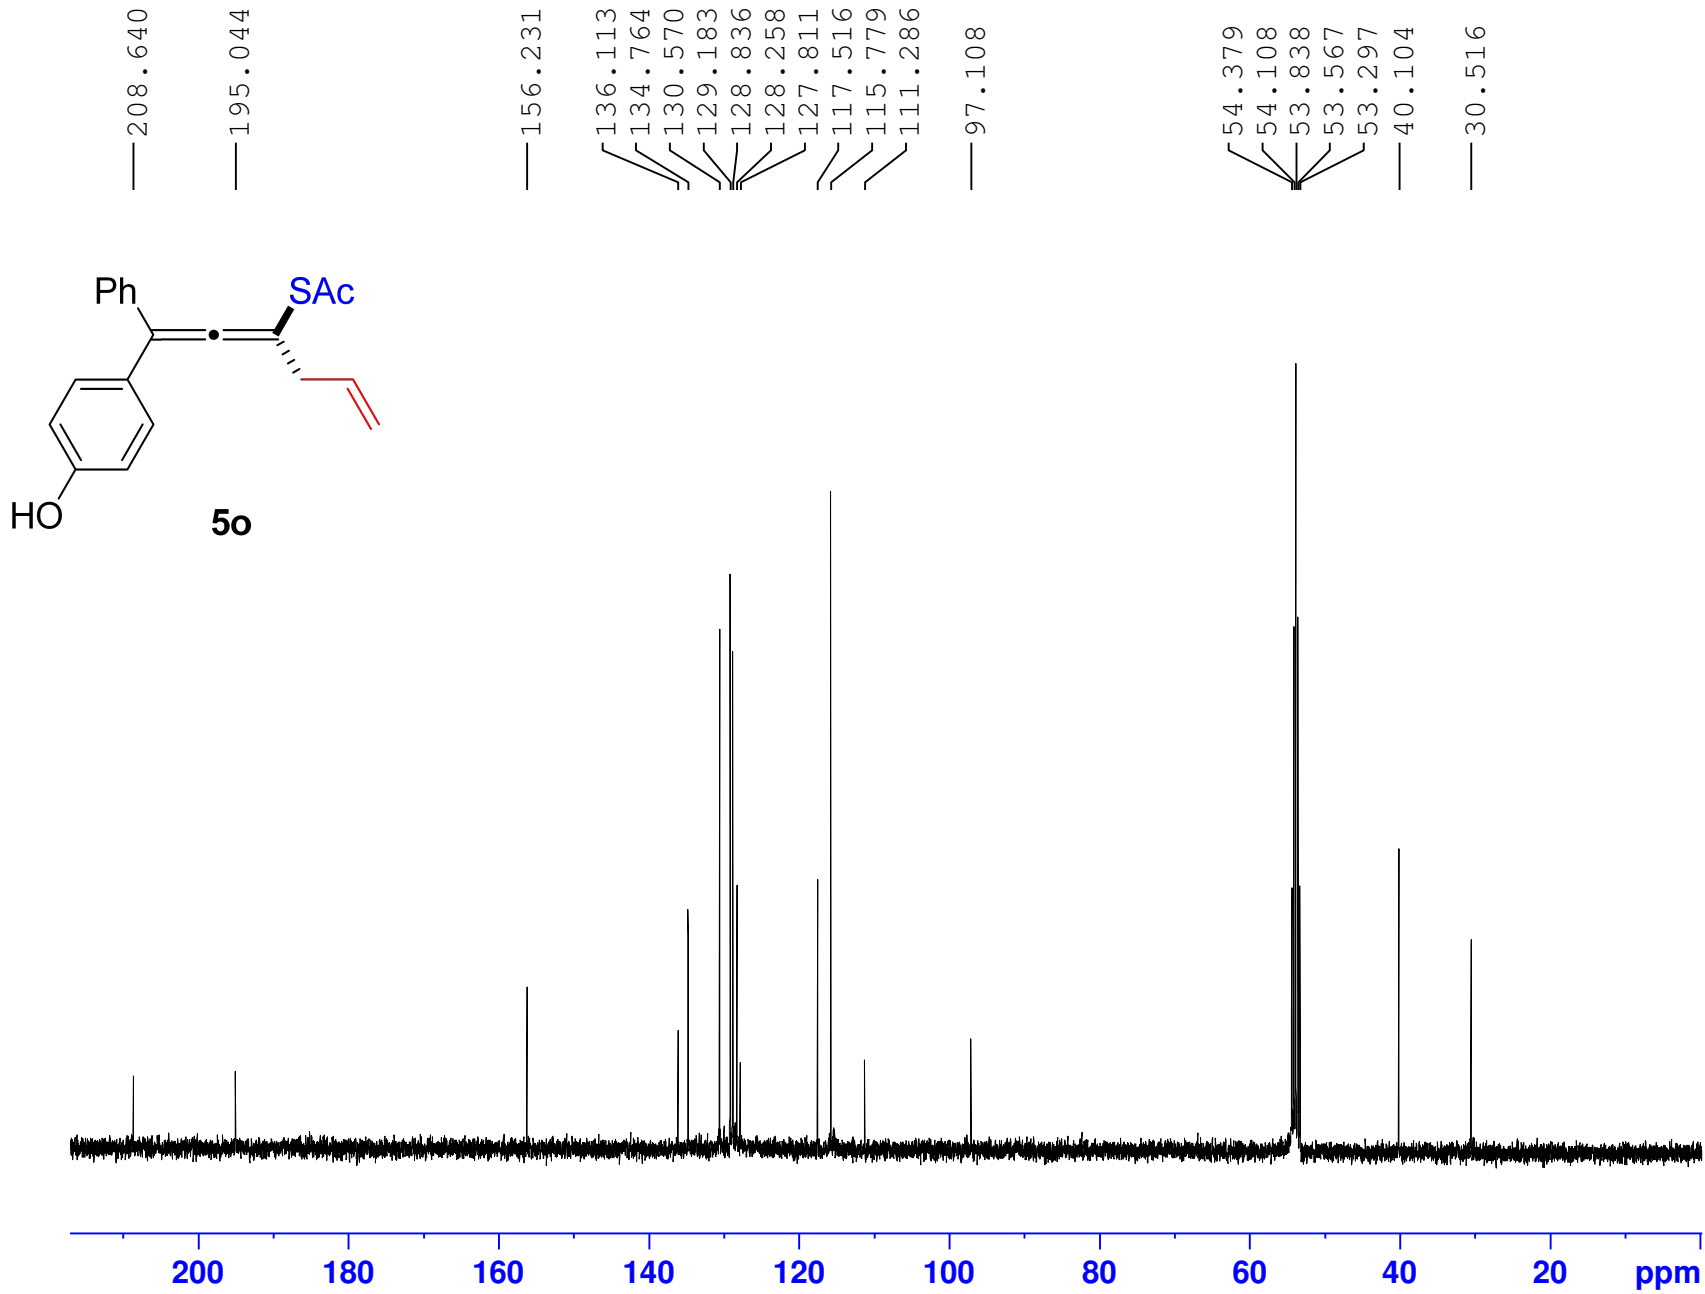

Current Data Parameters  
 NAME qdy-20118-1 C  
 EXPNO 1  
 PROCNO 1

F2 - Acquisition Parameters  
 Date\_ 20160416  
 Time 19.40  
 INSTRUM spect  
 PROBHD 5 mm PABBO BB/  
 PULPROG zgpg30  
 TD 65536  
 SOLVENT CD2C12  
 NS 150  
 DS 0  
 SWH 24038.461 Hz  
 FIDRES 0.366798 Hz  
 AQ 1.3631488 sec  
 RG 196.92  
 DW 20.800 usec  
 DE 6.50 usec  
 TE 299.4 K  
 D1 2.00000000 sec  
 D11 0.03000000 sec  
 TD0 1

==== CHANNEL f1 =====  
 SFO1 100.6228298 MHz  
 NUC1 13C  
 P1 9.70 usec  
 PLW1 46.98899841 W

==== CHANNEL f2 =====  
 SFO2 400.1316005 MHz  
 NUC2 1H  
 CPDPRG[2] waltz16  
 PCPD2 90.00 usec  
 PLW2 11.99499989 W  
 PLW12 0.34213999 W  
 PLW13 0.27713001 W

F2 - Processing parameters  
 SI 32768  
 SF 100.6127269 MHz  
 WDW EM  
 SSB 0  
 LB 1.00 Hz  
 GB 0  
 PC 1.40

Supplementary Figure 136. <sup>13</sup>C NMR spectrum for 5o

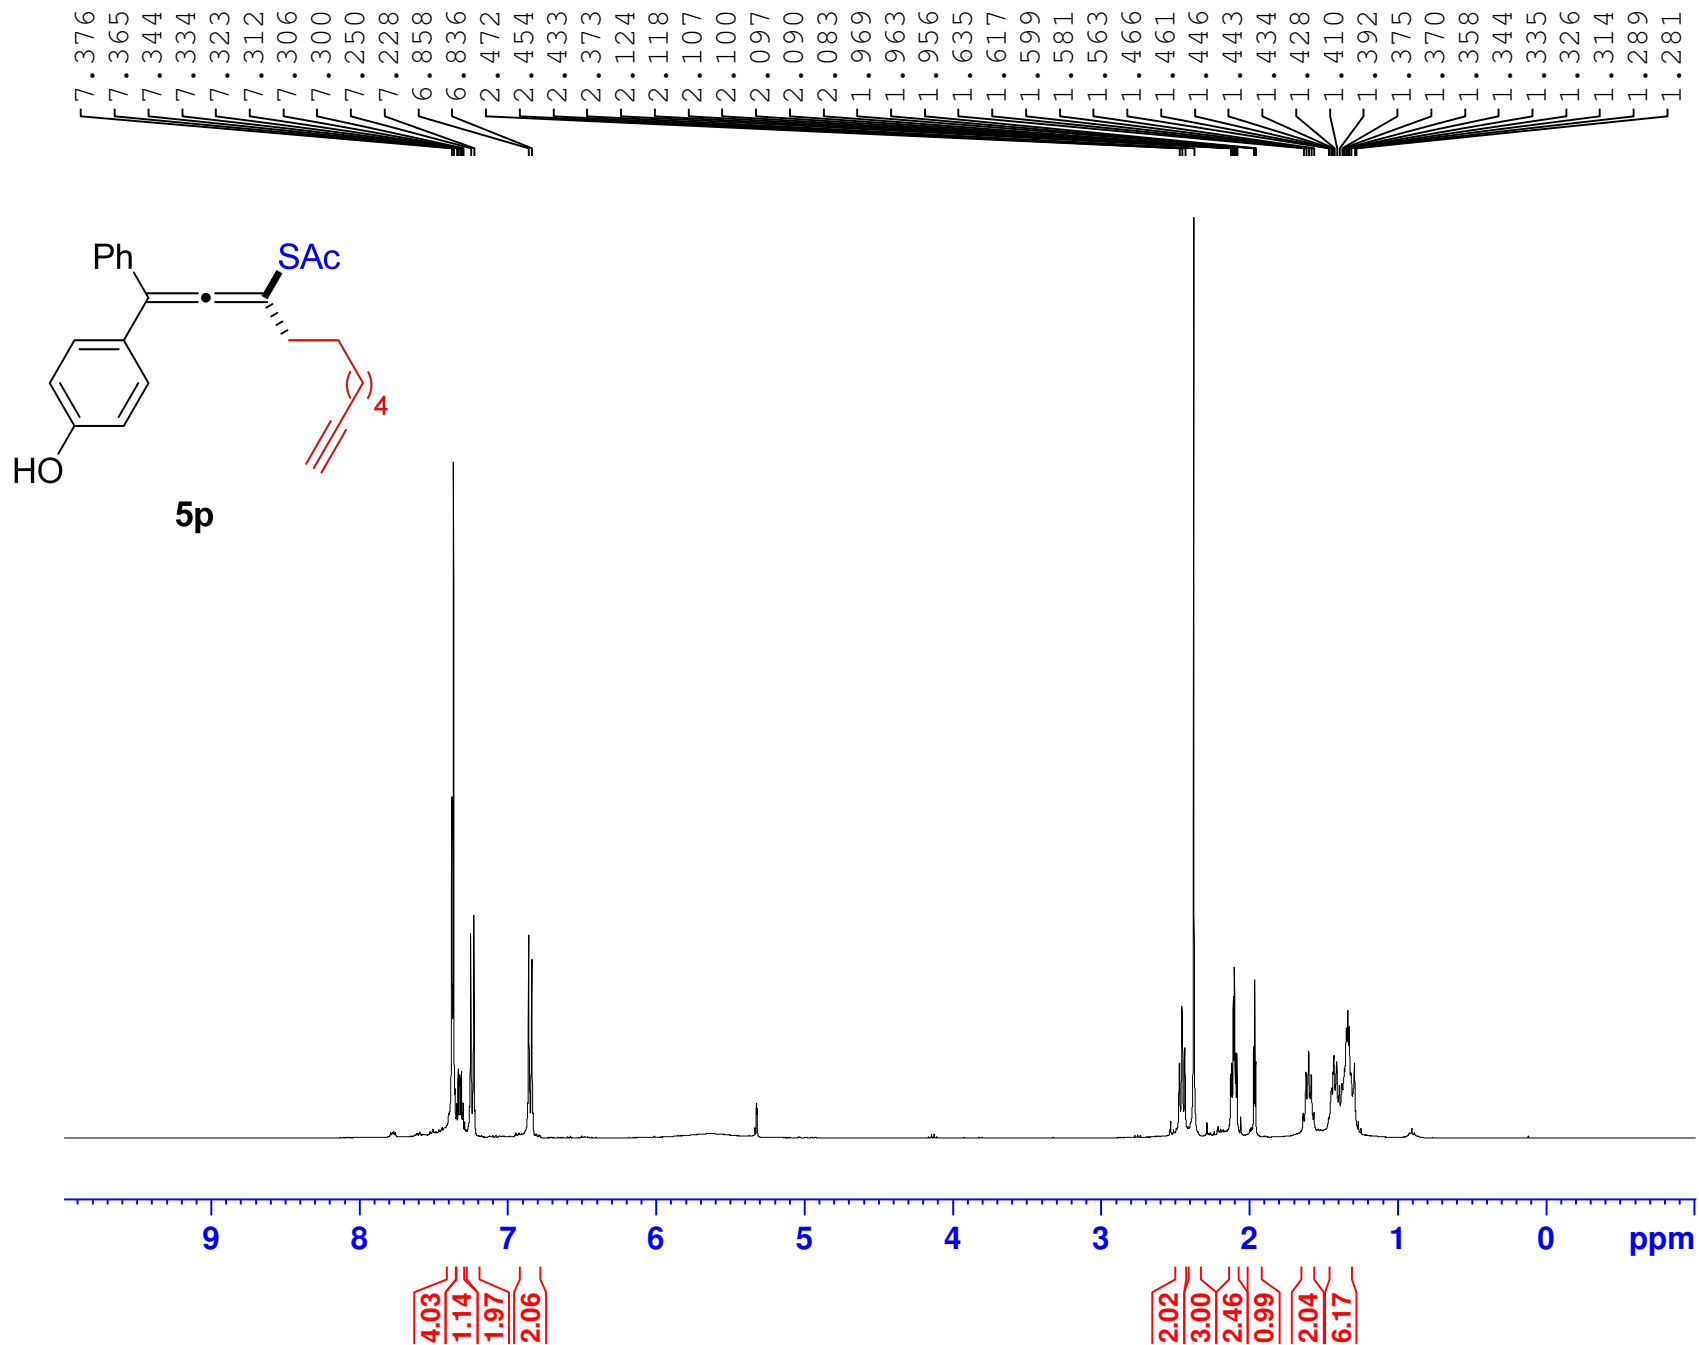

Current Data Parameters  
 NAME qdy-20099-4 H  
 EXPNO 1  
 PROCNO 1

F2 - Acquisition Parameters  
 Date\_ 20160331  
 Time 13.27  
 INSTRUM spect  
 PROBHD 5 mm PABBO BB/  
 PULPROG zg30  
 TD 65536  
 SOLVENT CD2C12  
 NS 6  
 DS 0  
 SWH 8012.820 Hz  
 FIDRES 0.122266 Hz  
 AQ 4.0894465 sec  
 RG 31.55  
 DW 62.400 usec  
 DE 6.50 usec  
 TE 297.5 K  
 D1 1.00000000 sec  
 TD0 1

==== CHANNEL f1 =====  
 SFO1 400.1324710 MHz  
 NUC1 1H  
 P1 14.50 usec  
 PLW1 11.99499989 W

F2 - Processing parameters  
 SI 65536  
 SF 400.1300152 MHz  
 WDW EM  
 SSB 0  
 LB 0.30 Hz  
 GB 0  
 PC 1.00

Supplementary Figure 137. <sup>1</sup>H NMR spectrum for 5p

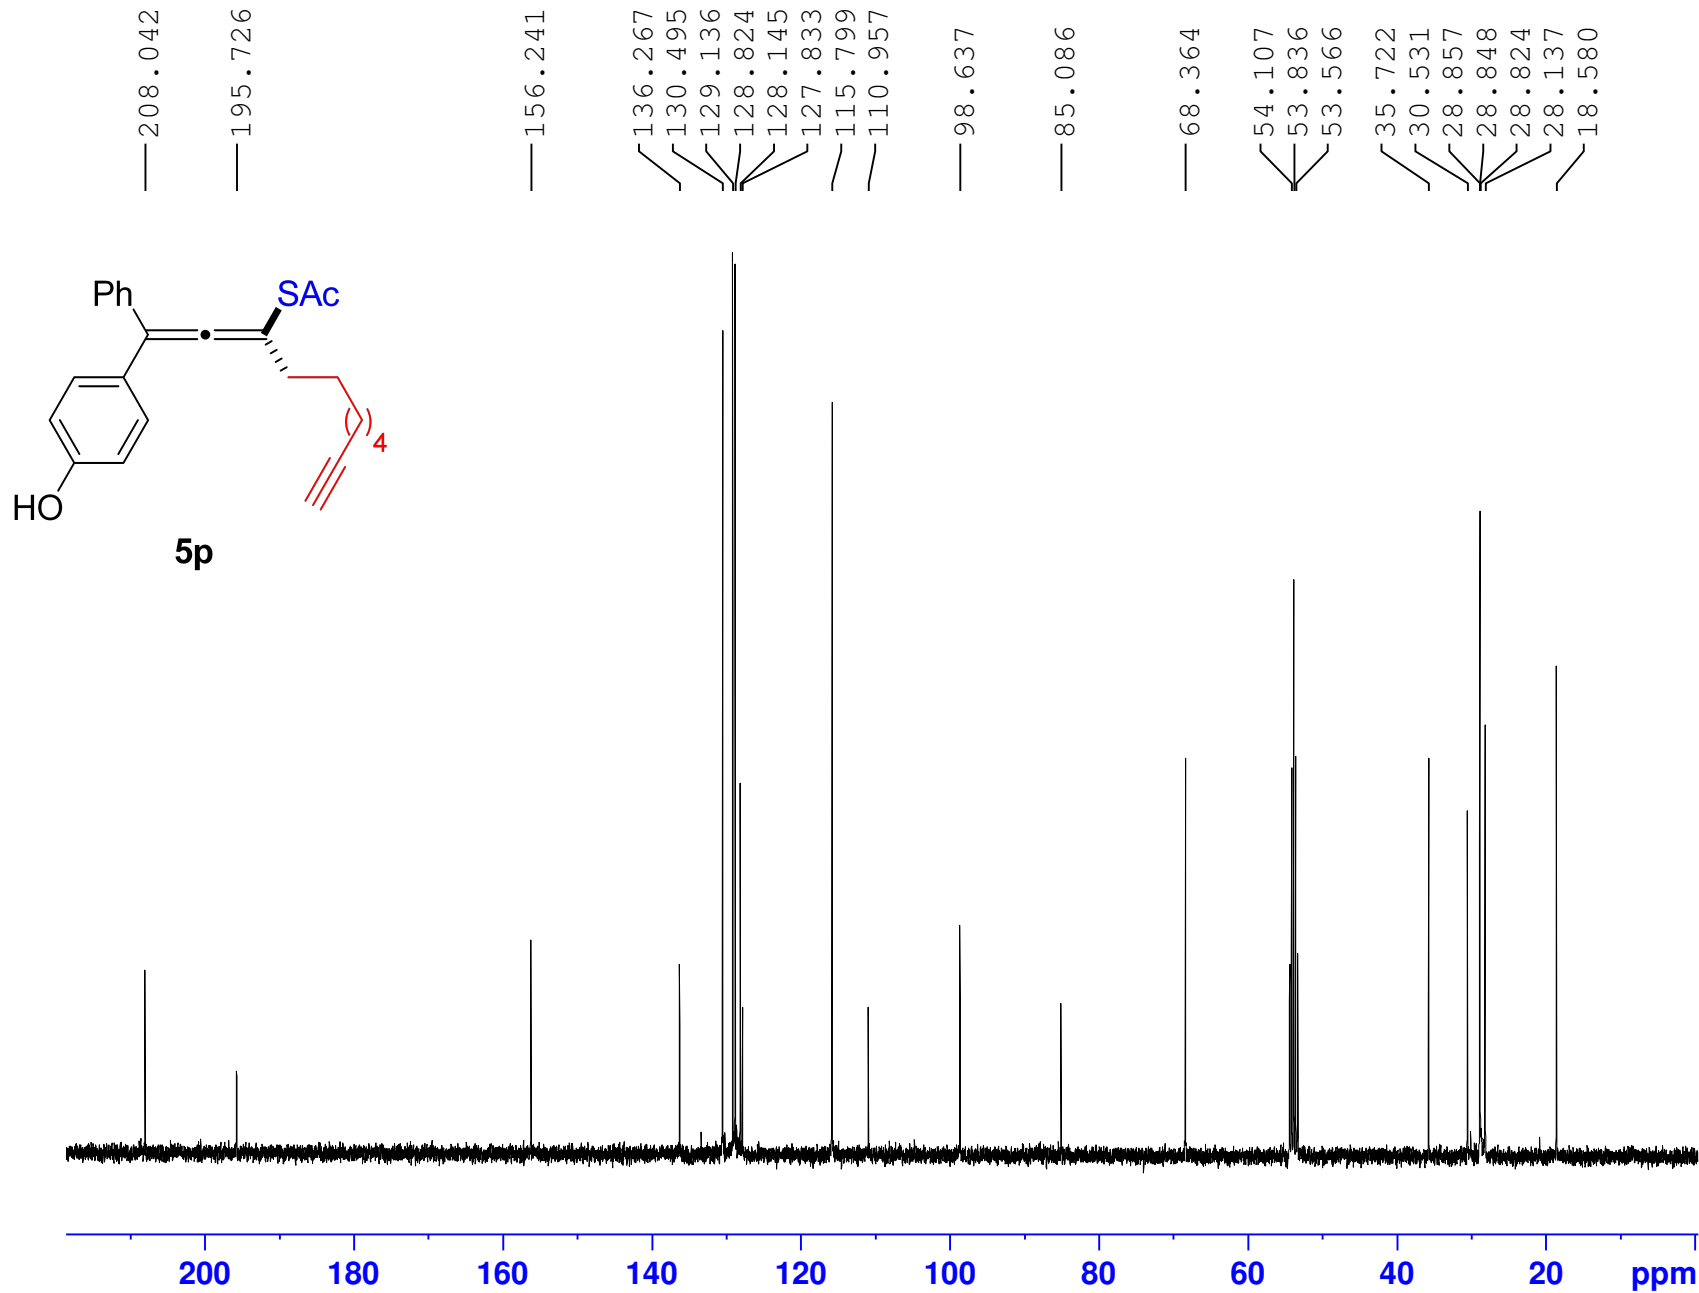

Current Data Parameters  
 NAME qdy-20099-4 C  
 EXPNO 1  
 PROCNO 1

F2 - Acquisition Parameters  
 Date\_ 20160331  
 Time 13.33  
 INSTRUM spect  
 PROBHD 5 mm PABBO BB/  
 PULPROG zgpg30  
 TD 65536  
 SOLVENT CD2C12  
 NS 83  
 DS 0  
 SWH 24038.461 Hz  
 FIDRES 0.366798 Hz  
 AQ 1.3631488 sec  
 RG 196.92  
 DW 20.800 usec  
 DE 6.50 usec  
 TE 298.5 K  
 D1 2.00000000 sec  
 D11 0.03000000 sec  
 TD0 1

==== CHANNEL f1 =====  
 SFO1 100.6228298 MHz  
 NUC1 13C  
 P1 9.70 usec  
 PLW1 46.98899841 W

==== CHANNEL f2 =====  
 SFO2 400.1316005 MHz  
 NUC2 1H  
 CPDPRG[2] waltz16  
 PCPD2 90.00 usec  
 PLW2 11.99499989 W  
 PLW12 0.34213999 W  
 PLW13 0.27713001 W

F2 - Processing parameters  
 SI 32768  
 SF 100.6127299 MHz  
 WDW EM  
 SSB 0  
 LB 1.00 Hz  
 GB 0  
 PC 1.40

Supplementary Figure 138. <sup>13</sup>C NMR spectrum for 5p

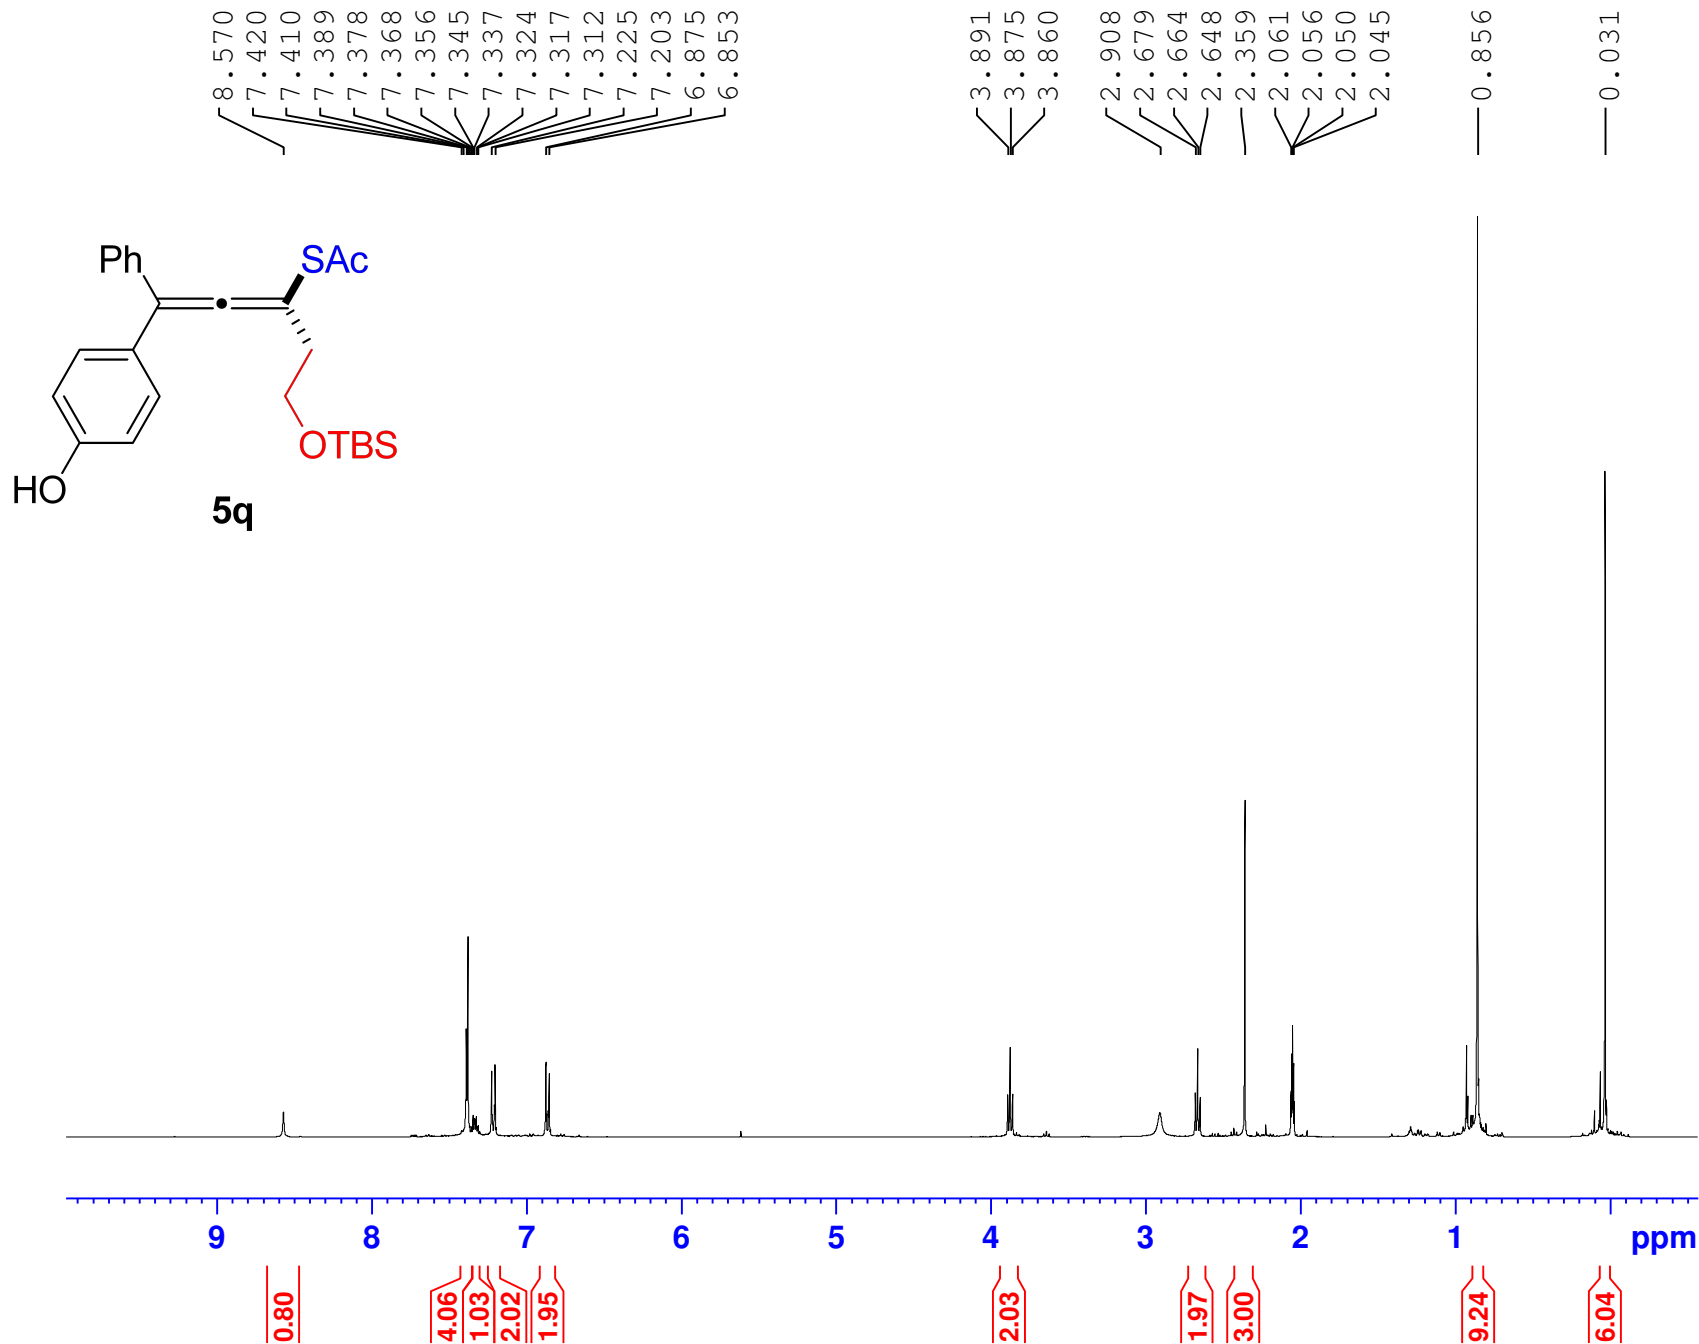

Current Data Parameters  
 NAME qdy-20103-2 H  
 EXPNO 3  
 PROCNO 1

F2 - Acquisition Parameters  
 Date\_ 20160402  
 Time 13.53  
 INSTRUM spect  
 PROBHD 5 mm PABBO BB/  
 PULPROG zg30  
 TD 65536  
 SOLVENT Acetone  
 NS 10  
 DS 0  
 SWH 8012.820 Hz  
 FIDRES 0.122266 Hz  
 AQ 4.0894465 sec  
 RG 54.81  
 DW 62.400 usec  
 DE 6.50 usec  
 TE 297.8 K  
 D1 1.00000000 sec  
 TD0 1

===== CHANNEL f1 =====  
 SFO1 400.1324710 MHz  
 NUC1 1H  
 P1 14.50 usec  
 PLW1 11.99499989 W

F2 - Processing parameters  
 SI 65536  
 SF 400.1300067 MHz  
 WDW EM  
 SSB 0  
 LB 0.30 Hz  
 GB 0  
 PC 1.00

Supplementary Figure 139. <sup>1</sup>H NMR spectrum for 5q



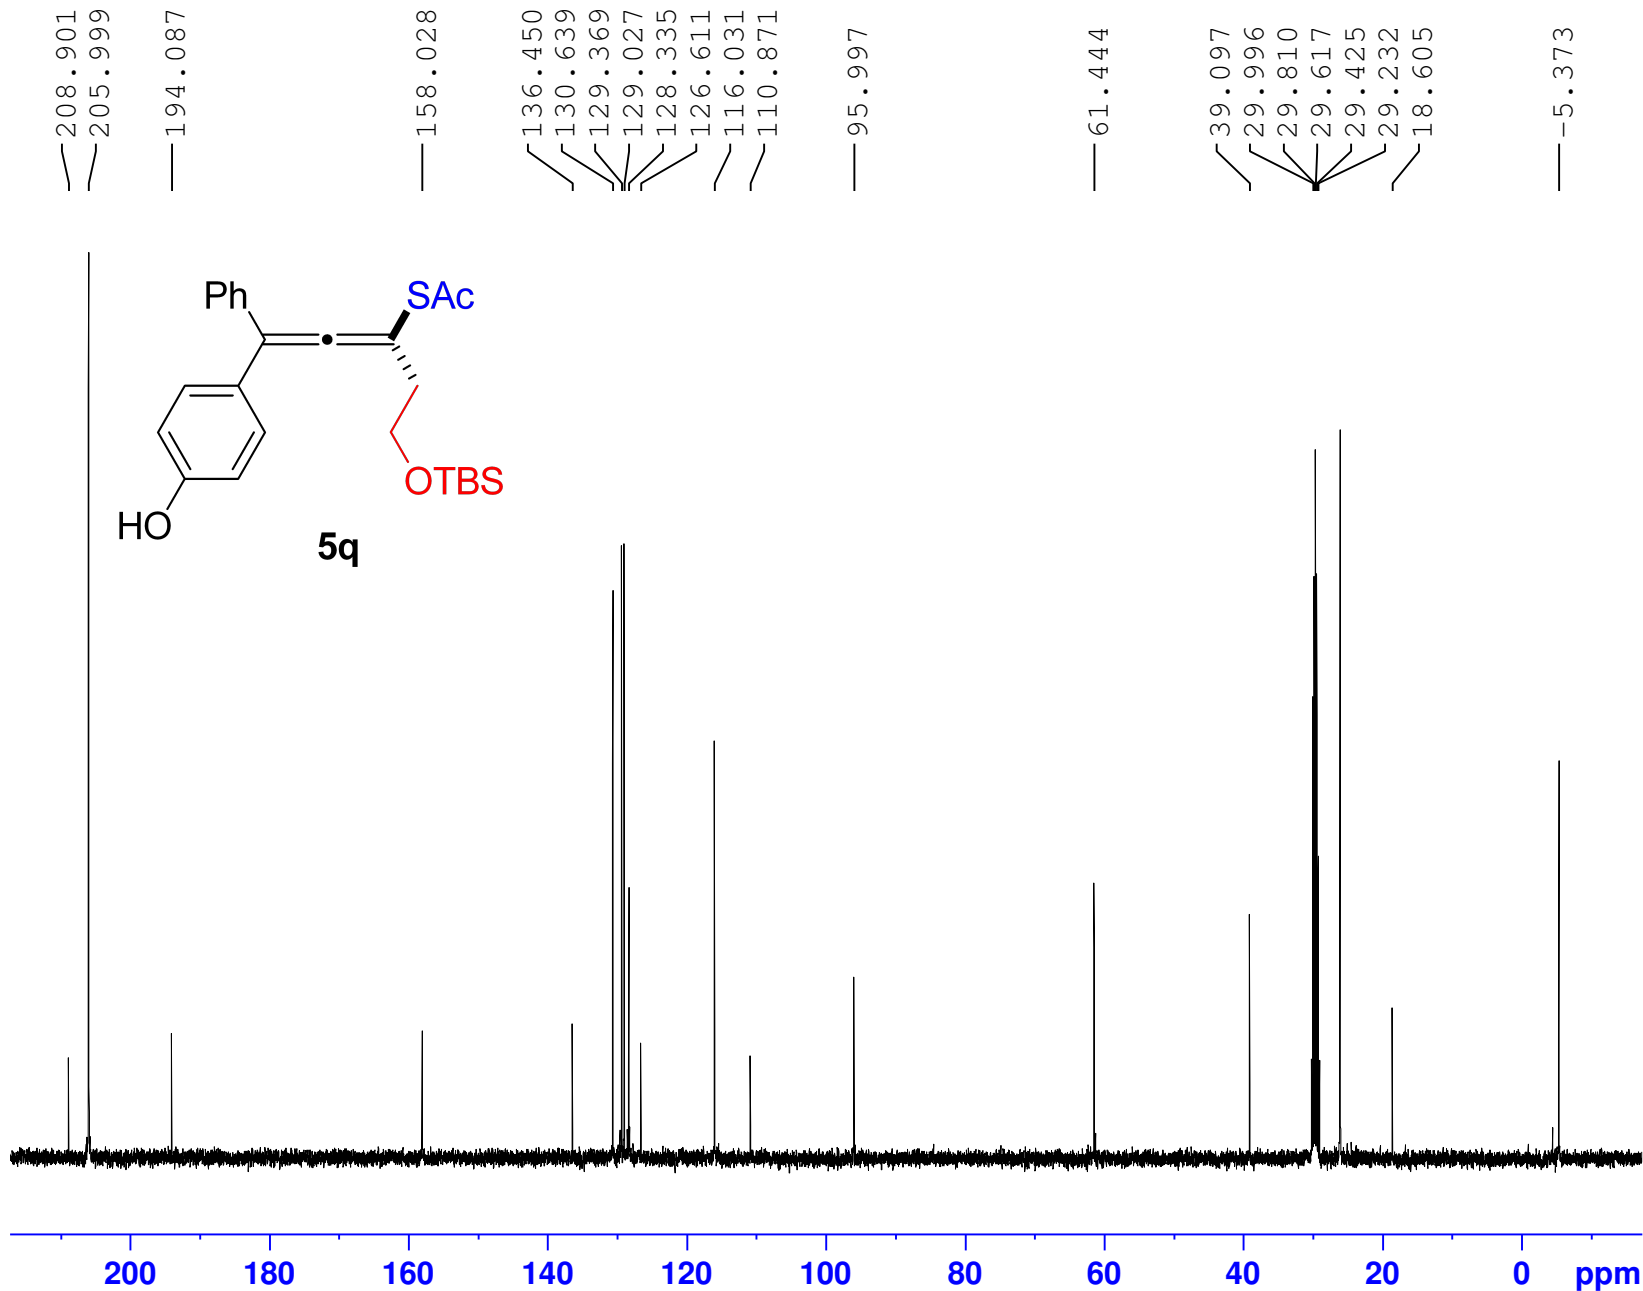

Current Data Parameters  
 NAME qdy-20103-2 C  
 EXPNO 1  
 PROCNO 1

F2 - Acquisition Parameters  
 Date\_ 20160401  
 Time 21.34  
 INSTRUM spect  
 PROBHD 5 mm PABBO BB/  
 PULPROG zgpg30  
 TD 65536  
 SOLVENT Acetone  
 NS 45  
 DS 0  
 SWH 24038.461 Hz  
 FIDRES 0.366798 Hz  
 AQ 1.3631488 sec  
 RG 196.92  
 DW 20.800 usec  
 DE 6.50 usec  
 TE 297.7 K  
 D1 2.00000000 sec  
 D11 0.03000000 sec  
 TD0 1

==== CHANNEL f1 =====  
 SFO1 100.6228298 MHz  
 NUC1 13C  
 P1 9.70 usec  
 PLW1 46.98899841 W

==== CHANNEL f2 =====  
 SFO2 400.1316005 MHz  
 NUC2 1H  
 CPDPRG[2] waltz16  
 PCPD2 90.00 usec  
 PLW2 11.99499989 W  
 PLW12 0.34213999 W  
 PLW13 0.27713001 W

F2 - Processing parameters  
 SI 32768  
 SF 100.6127109 MHz  
 WDW EM  
 SSB 0  
 LB 1.00 Hz  
 GB 0  
 PC 1.40

Supplementary Figure 140. <sup>13</sup>C NMR spectrum for 5q

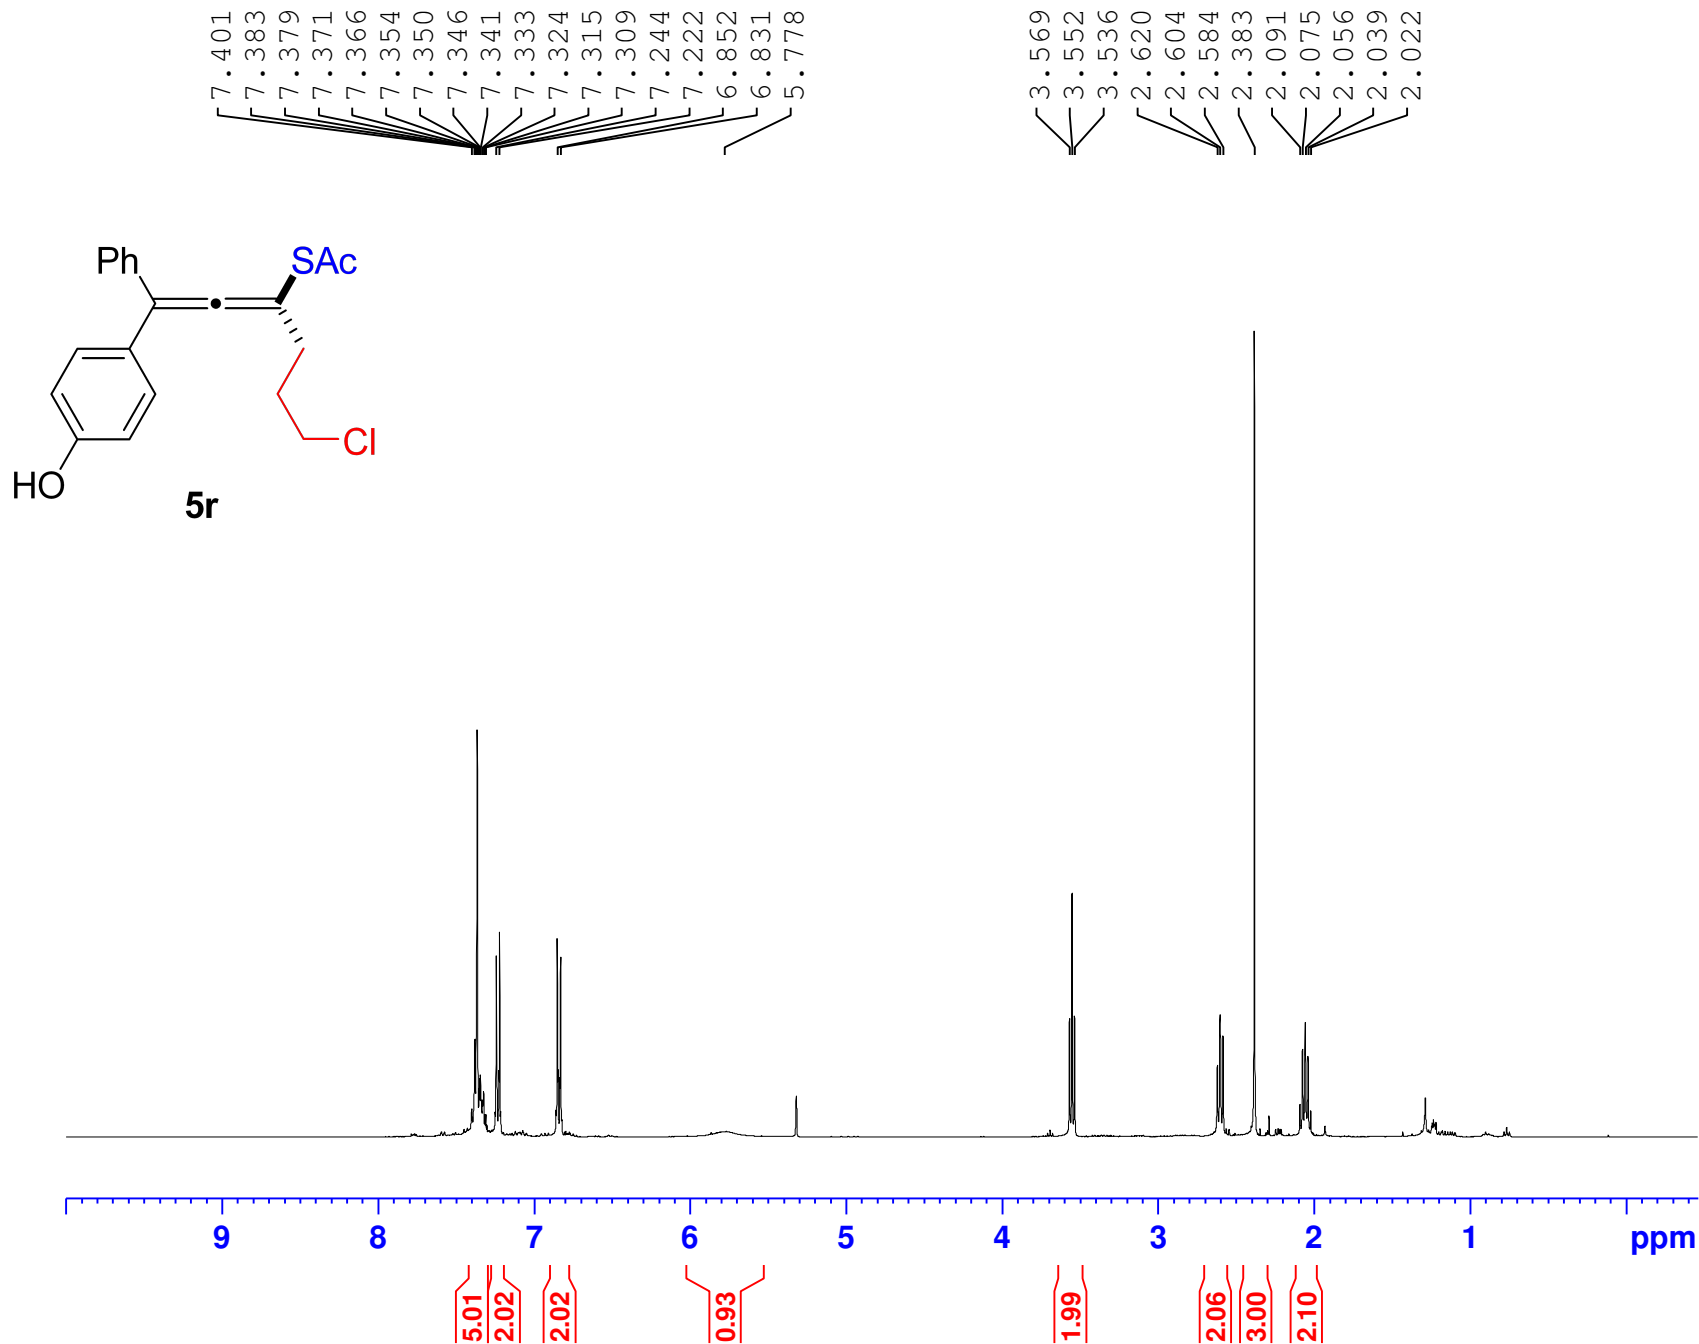

Current Data Parameters  
 NAME qdy-10111-2 H  
 EXPNO 2  
 PROCNO 1

F2 - Acquisition Parameters  
 Date\_ 20160413  
 Time 22.09  
 INSTRUM spect  
 PROBHD 5 mm PABBO BB/  
 PULPROG zg30  
 TD 65536  
 SOLVENT CD2C12  
 NS 7  
 DS 0  
 SWH 8012.820 Hz  
 FIDRES 0.122266 Hz  
 AQ 4.0894465 sec  
 RG 39.46  
 DW 62.400 usec  
 DE 6.50 usec  
 TE 297.0 K  
 D1 1.00000000 sec  
 TD0 1

==== CHANNEL f1 =====  
 SFO1 400.1324710 MHz  
 NUC1 1H  
 P1 14.50 usec  
 PLW1 11.99499989 W

F2 - Processing parameters  
 SI 65536  
 SF 400.1300152 MHz  
 WDW EM  
 SSB 0  
 LB 0.30 Hz  
 GB 0  
 PC 1.00

Supplementary Figure 141. <sup>1</sup>H NMR spectrum for 5r

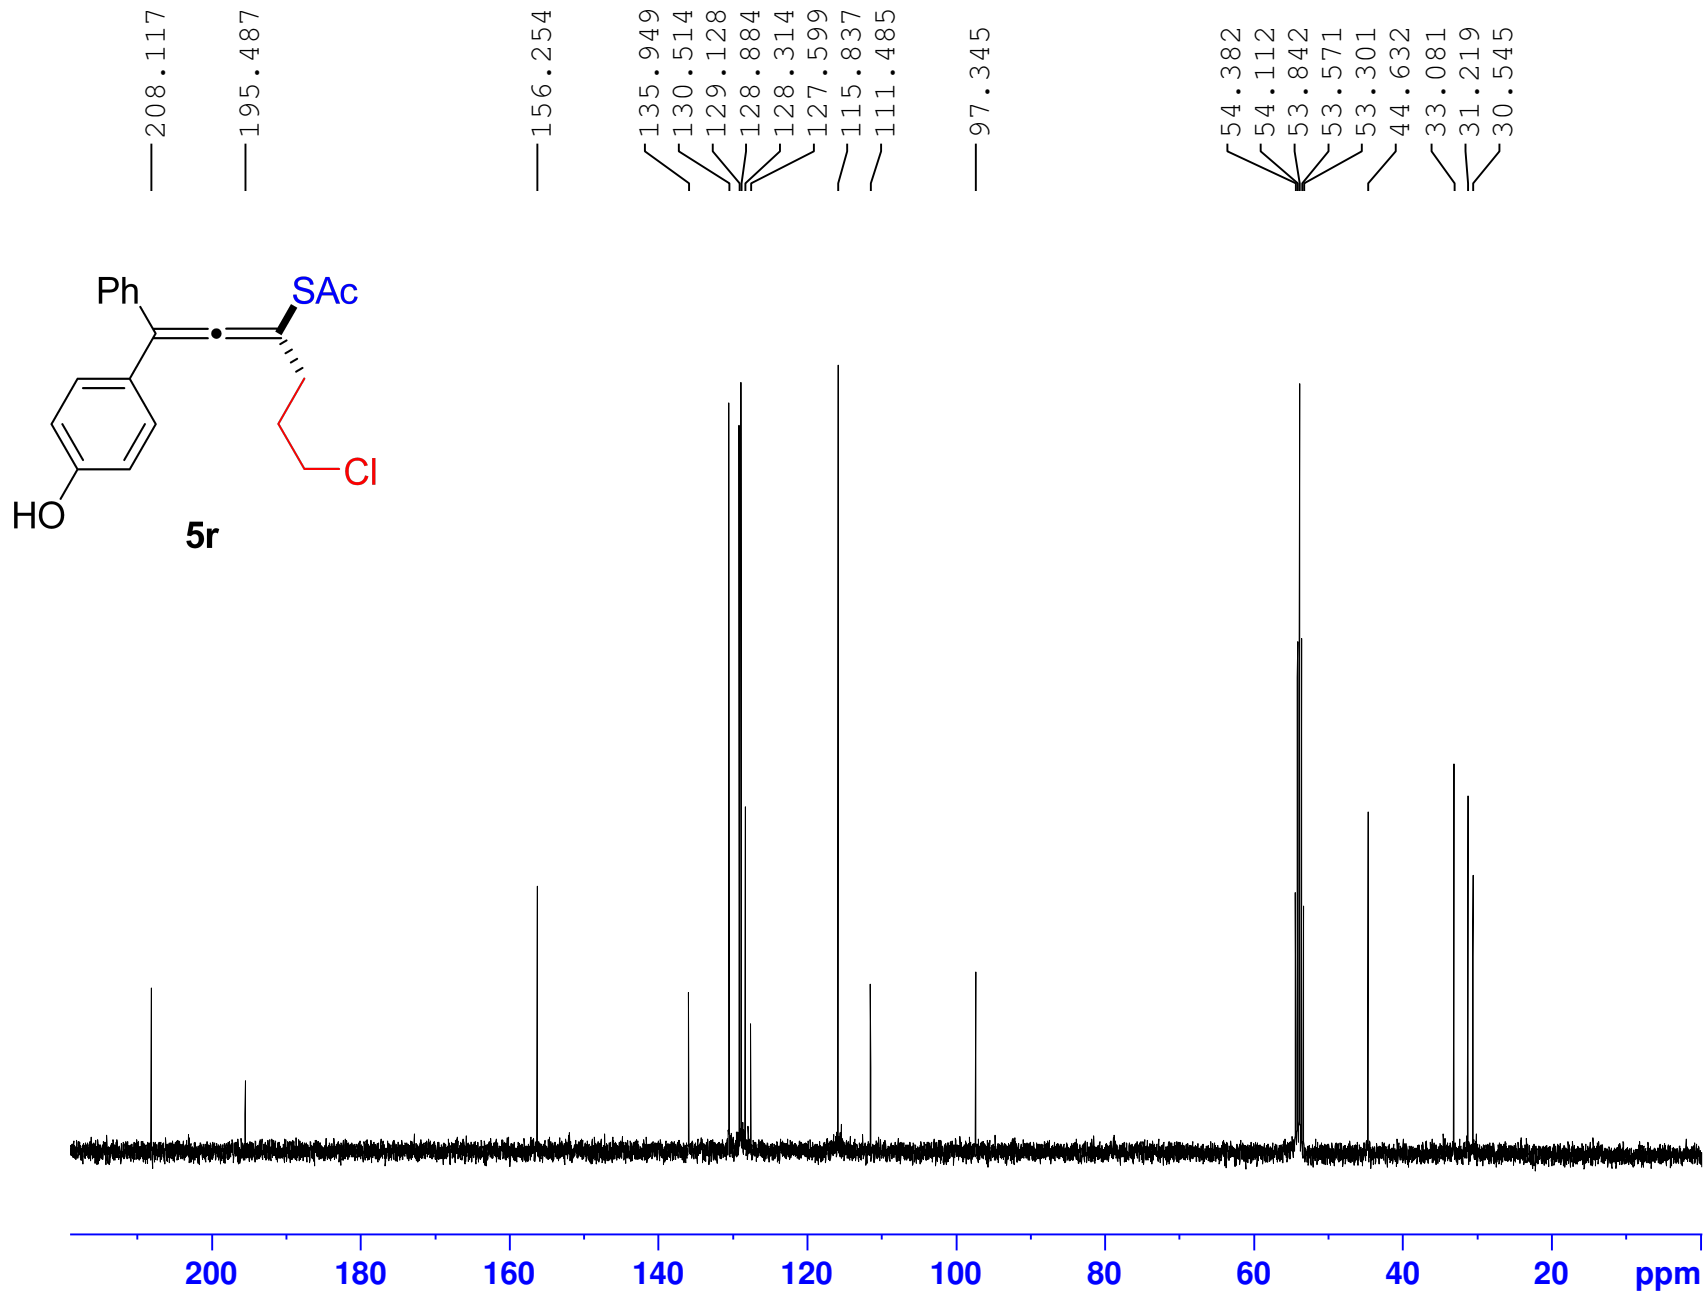

Current Data Parameters  
 NAME qdy-10111-2 C  
 EXPNO 2  
 PROCNO 1

F2 - Acquisition Parameters  
 Date\_ 20160413  
 Time 22.13  
 INSTRUM spect  
 PROBHD 5 mm PABBO BB/  
 PULPROG zgpg30  
 TD 65536  
 SOLVENT CD2C12  
 NS 54  
 DS 0  
 SWH 24038.461 Hz  
 FIDRES 0.366798 Hz  
 AQ 1.3631488 sec  
 RG 196.92  
 DW 20.800 usec  
 DE 6.50 usec  
 TE 298.0 K  
 D1 2.00000000 sec  
 D11 0.03000000 sec  
 TD0 1

==== CHANNEL f1 =====  
 SFO1 100.6228298 MHz  
 NUC1 13C  
 P1 9.70 usec  
 PLW1 46.98899841 W

==== CHANNEL f2 =====  
 SFO2 400.1316005 MHz  
 NUC2 1H  
 CPDPRG[2] waltz16  
 PCPD2 90.00 usec  
 PLW2 11.99499989 W  
 PLW12 0.34213999 W  
 PLW13 0.27713001 W

F2 - Processing parameters  
 SI 32768  
 SF 100.6127306 MHz  
 WDW EM  
 SSB 0  
 LB 1.00 Hz  
 GB 0  
 PC 1.40

Supplementary Figure 142. <sup>13</sup>C NMR spectrum for 5r

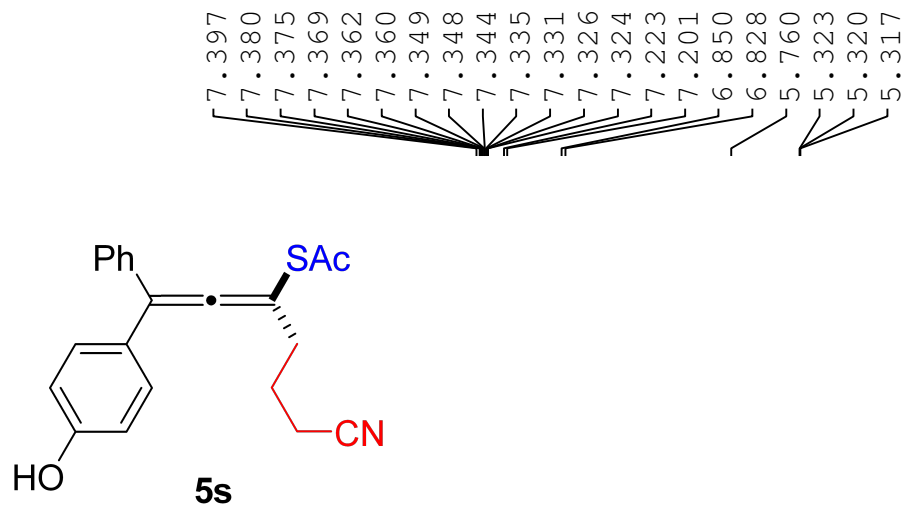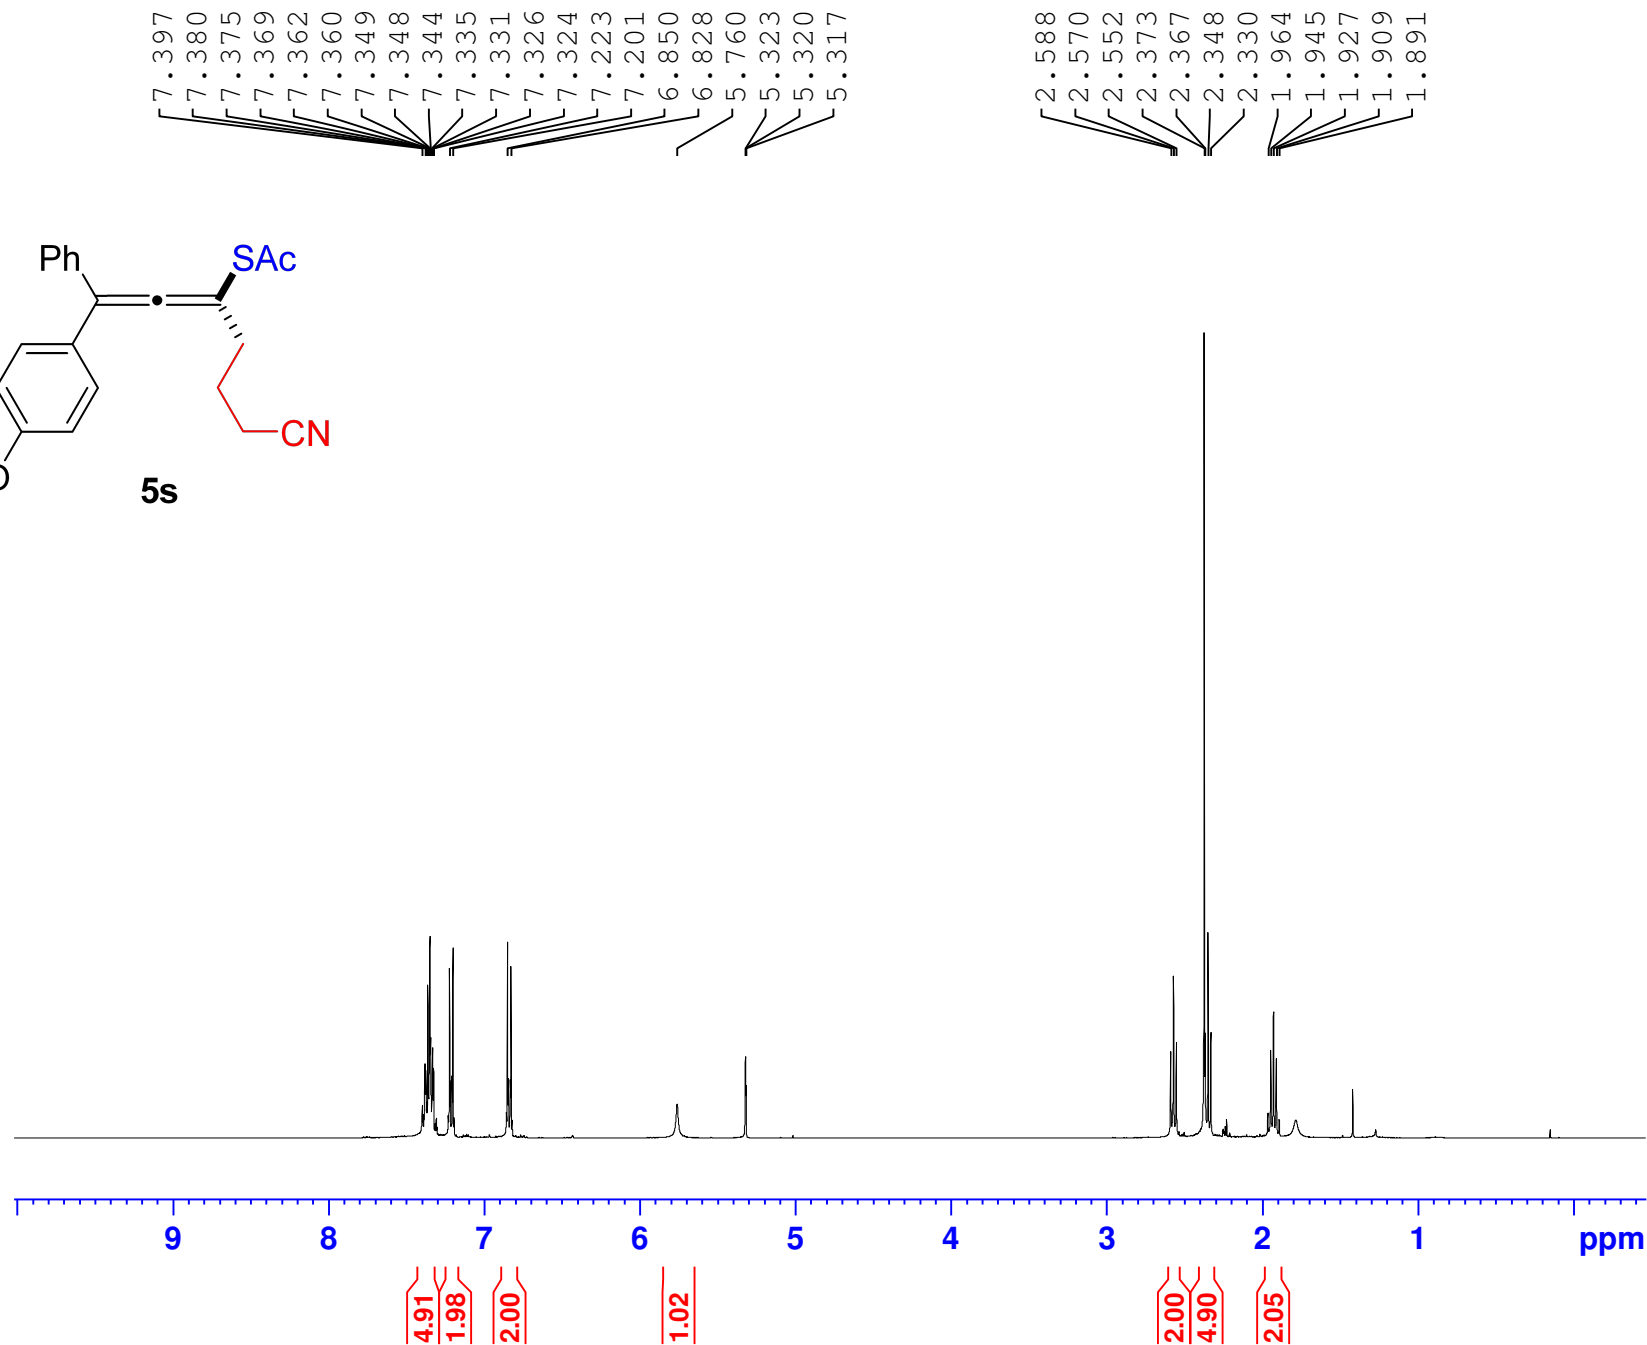

Current Data Parameters  
 NAME qdy-20123-2 H  
 EXPNO 4  
 PROCNO 1

F2 - Acquisition Parameters  
 Date\_ 20160425  
 Time 16.46  
 INSTRUM spect  
 PROBHD 5 mm PABBO BB/  
 PULPROG zg30  
 TD 65536  
 SOLVENT CD2C12  
 NS 5  
 DS 0  
 SWH 8012.820 Hz  
 FIDRES 0.122266 Hz  
 AQ 4.0894465 sec  
 RG 88.84  
 DW 62.400 usec  
 DE 6.50 usec  
 TE 297.5 K  
 D1 1.00000000 sec  
 TD0 1

===== CHANNEL f1 =====  
 SFO1 400.1324710 MHz  
 NUC1 1H  
 P1 14.50 usec  
 PLW1 11.99499989 W

F2 - Processing parameters  
 SI 65536  
 SF 400.1300153 MHz  
 WDW EM  
 SSB 0  
 LB 0.30 Hz  
 GB 0  
 PC 1.00

Supplementary Figure 143. <sup>1</sup>H NMR spectrum for 5s

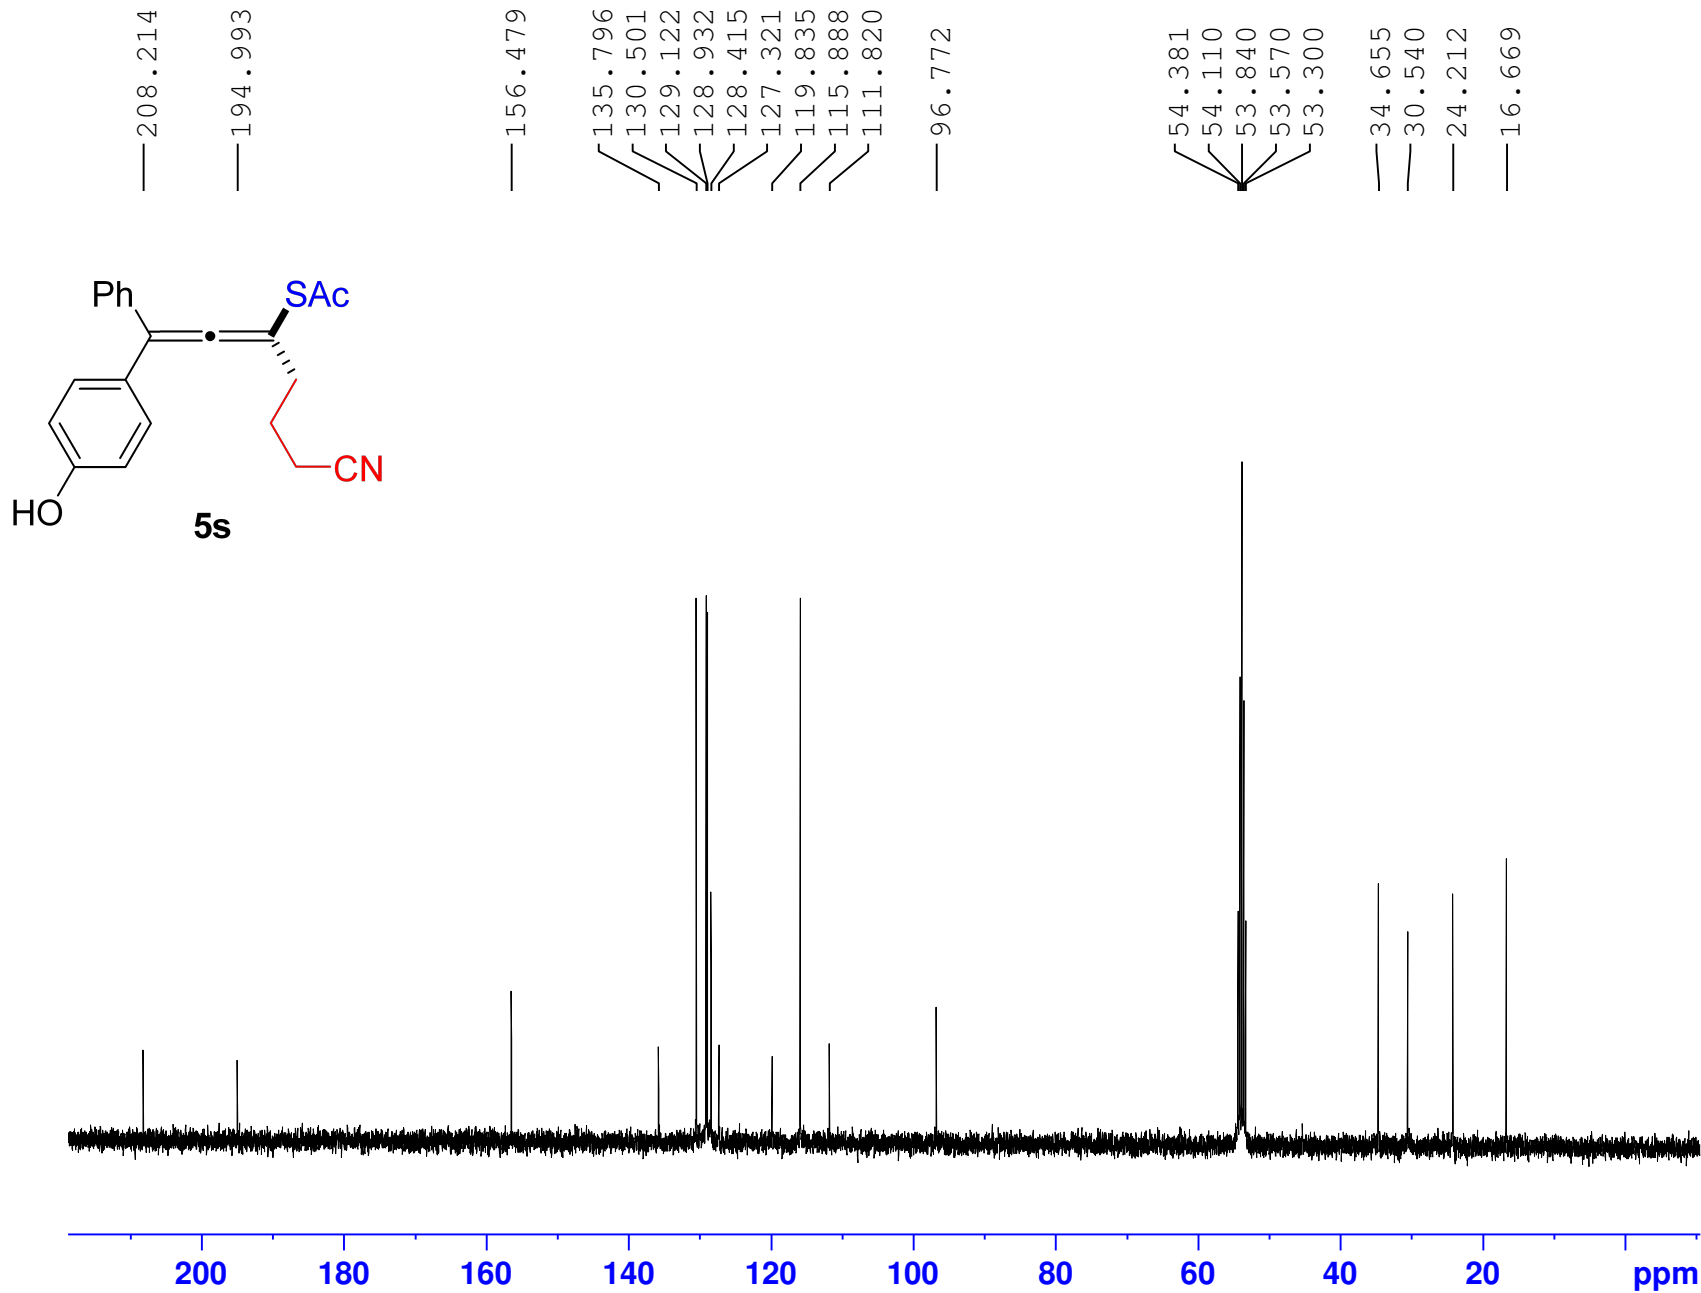

Current Data Parameters  
 NAME qdy-20123-2 C  
 EXPNO 1  
 PROCNO 1

F2 - Acquisition Parameters  
 Date\_ 20160423  
 Time 21.59  
 INSTRUM spect  
 PROBHD 5 mm PABBO BB/  
 PULPROG zgpg30  
 TD 65536  
 SOLVENT CD2C12  
 NS 256  
 DS 0  
 SWH 24038.461 Hz  
 FIDRES 0.366798 Hz  
 AQ 1.3631488 sec  
 RG 196.92  
 DW 20.800 usec  
 DE 6.50 usec  
 TE 299.5 K  
 D1 2.00000000 sec  
 D11 0.03000000 sec  
 TD0 1

==== CHANNEL f1 =====  
 SFO1 100.6228298 MHz  
 NUC1 13C  
 P1 9.70 usec  
 PLW1 46.98899841 W

==== CHANNEL f2 =====  
 SFO2 400.1316005 MHz  
 NUC2 1H  
 CPDPRG[2] waltz16  
 PCPD2 90.00 usec  
 PLW2 11.99499989 W  
 PLW12 0.34213999 W  
 PLW13 0.27713001 W

F2 - Processing parameters  
 SI 32768  
 SF 100.6127284 MHz  
 WDW EM  
 SSB 0  
 LB 1.00 Hz  
 GB 0  
 PC 1.40

Supplementary Figure 144. <sup>13</sup>C NMR spectrum for 5s

8.586  
 7.408  
 7.388  
 7.371  
 7.350  
 7.332  
 7.187  
 7.166  
 6.883  
 6.862

2.971  
 2.369  
 2.050  
 1.723  
 1.711  
 1.702  
 1.691  
 1.679  
 1.671  
 1.659  
 0.806  
 0.802  
 0.786  
 0.782  
 0.586  
 0.581  
 0.576

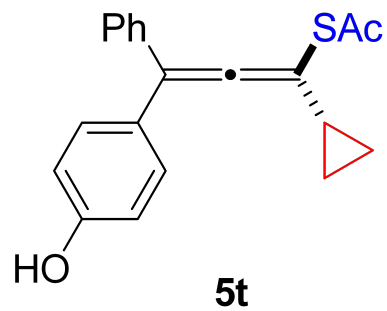

Current Data Parameters  
 NAME qdy-20103-1 H  
 EXPNO 2  
 PROCNO 1

F2 - Acquisition Parameters  
 Date\_ 20160408  
 Time 13.37  
 INSTRUM spect  
 PROBHD 5 mm PABBO BB/  
 PULPROG zg30  
 TD 65536  
 SOLVENT Acetone  
 NS 16  
 DS 0  
 SWH 8012.820 Hz  
 FIDRES 0.122266 Hz  
 AQ 4.0894465 sec  
 RG 54.81  
 DW 62.400 usec  
 DE 6.50 usec  
 TE 297.8 K  
 D1 1.00000000 sec  
 TD0 1

==== CHANNEL f1 =====  
 SFO1 400.1324710 MHz  
 NUC1 1H  
 P1 14.50 usec  
 PLW1 11.99499989 W

F2 - Processing parameters  
 SI 65536  
 SF 400.1300066 MHz  
 WDW EM  
 SSB 0  
 LB 0.30 Hz  
 GB 0  
 PC 1.00

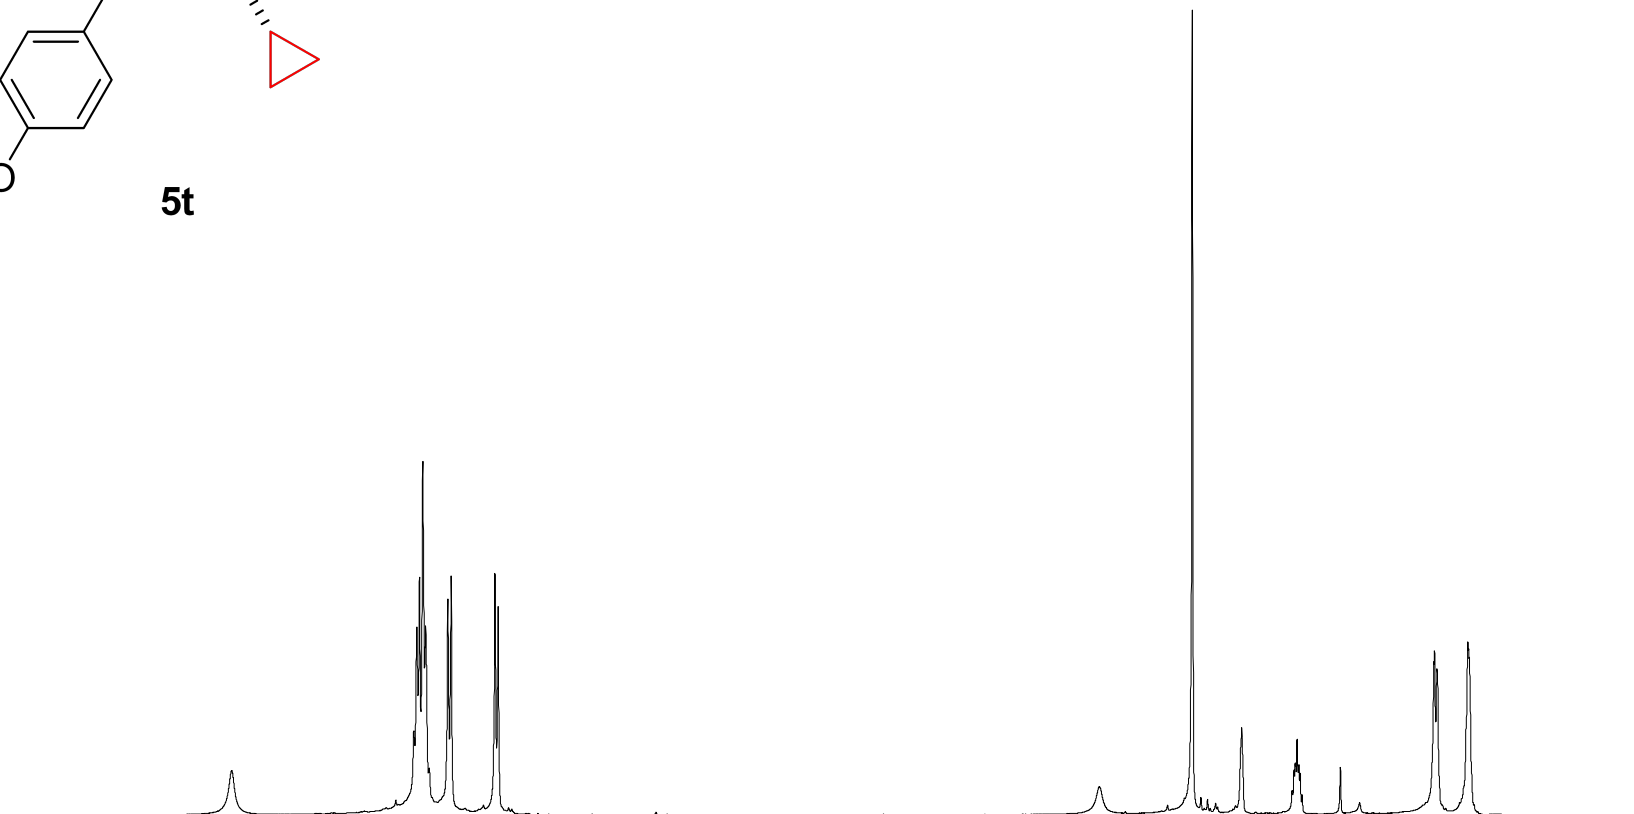

1.06  
 5.19  
 1.99  
 1.96  
 3.00  
 0.99  
 1.98  
 1.97

Supplementary Figure 145. <sup>1</sup>H NMR spectrum for 5t

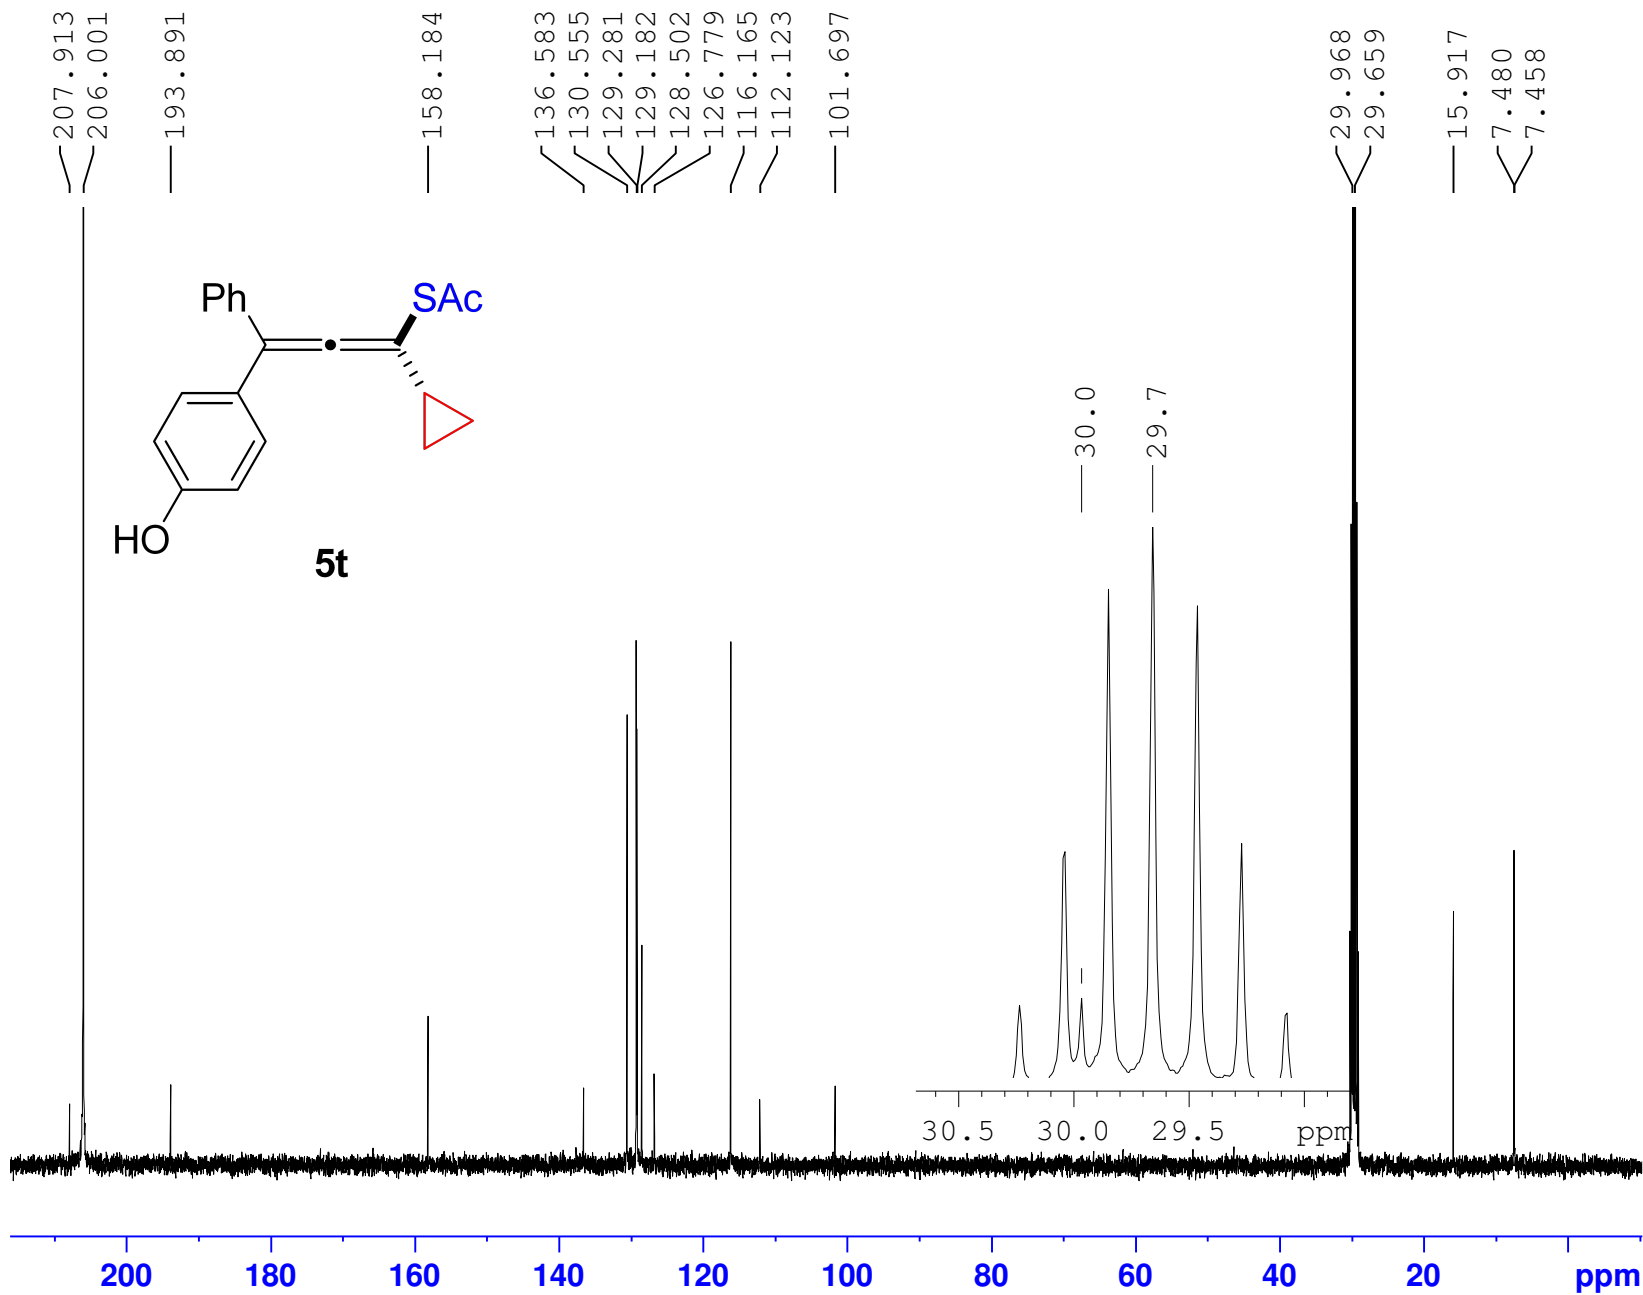

Current Data Parameters  
 NAME qdy-20103-1 C  
 EXPNO 3  
 PROCNO 1

F2 - Acquisition Parameters  
 Date\_ 20160408  
 Time 13.44  
 INSTRUM spect  
 PROBHD 5 mm PABBO BB/  
 PULPROG zgpg30  
 TD 65536  
 SOLVENT Acetone  
 NS 116  
 DS 0  
 SWH 24038.461 Hz  
 FIDRES 0.366798 Hz  
 AQ 1.3631488 sec  
 RG 196.92  
 DW 20.800 usec  
 DE 6.50 usec  
 TE 299.3 K  
 D1 2.00000000 sec  
 D11 0.03000000 sec  
 TD0 1

==== CHANNEL f1 =====  
 SFO1 100.6228298 MHz  
 NUC1 13C  
 P1 9.70 usec  
 PLW1 46.98899841 W

==== CHANNEL f2 =====  
 SFO2 400.1316005 MHz  
 NUC2 1H  
 CPDPRG[2] waltz16  
 PCPD2 90.00 usec  
 PLW2 11.99499989 W  
 PLW12 0.34213999 W  
 PLW13 0.27713001 W

F2 - Processing parameters  
 SI 32768  
 SF 100.6126993 MHz  
 WDW EM  
 SSB 0  
 LB 1.00 Hz  
 GB 0  
 PC 1.40

Supplementary Figure 146. <sup>13</sup>C NMR spectrum for 5t

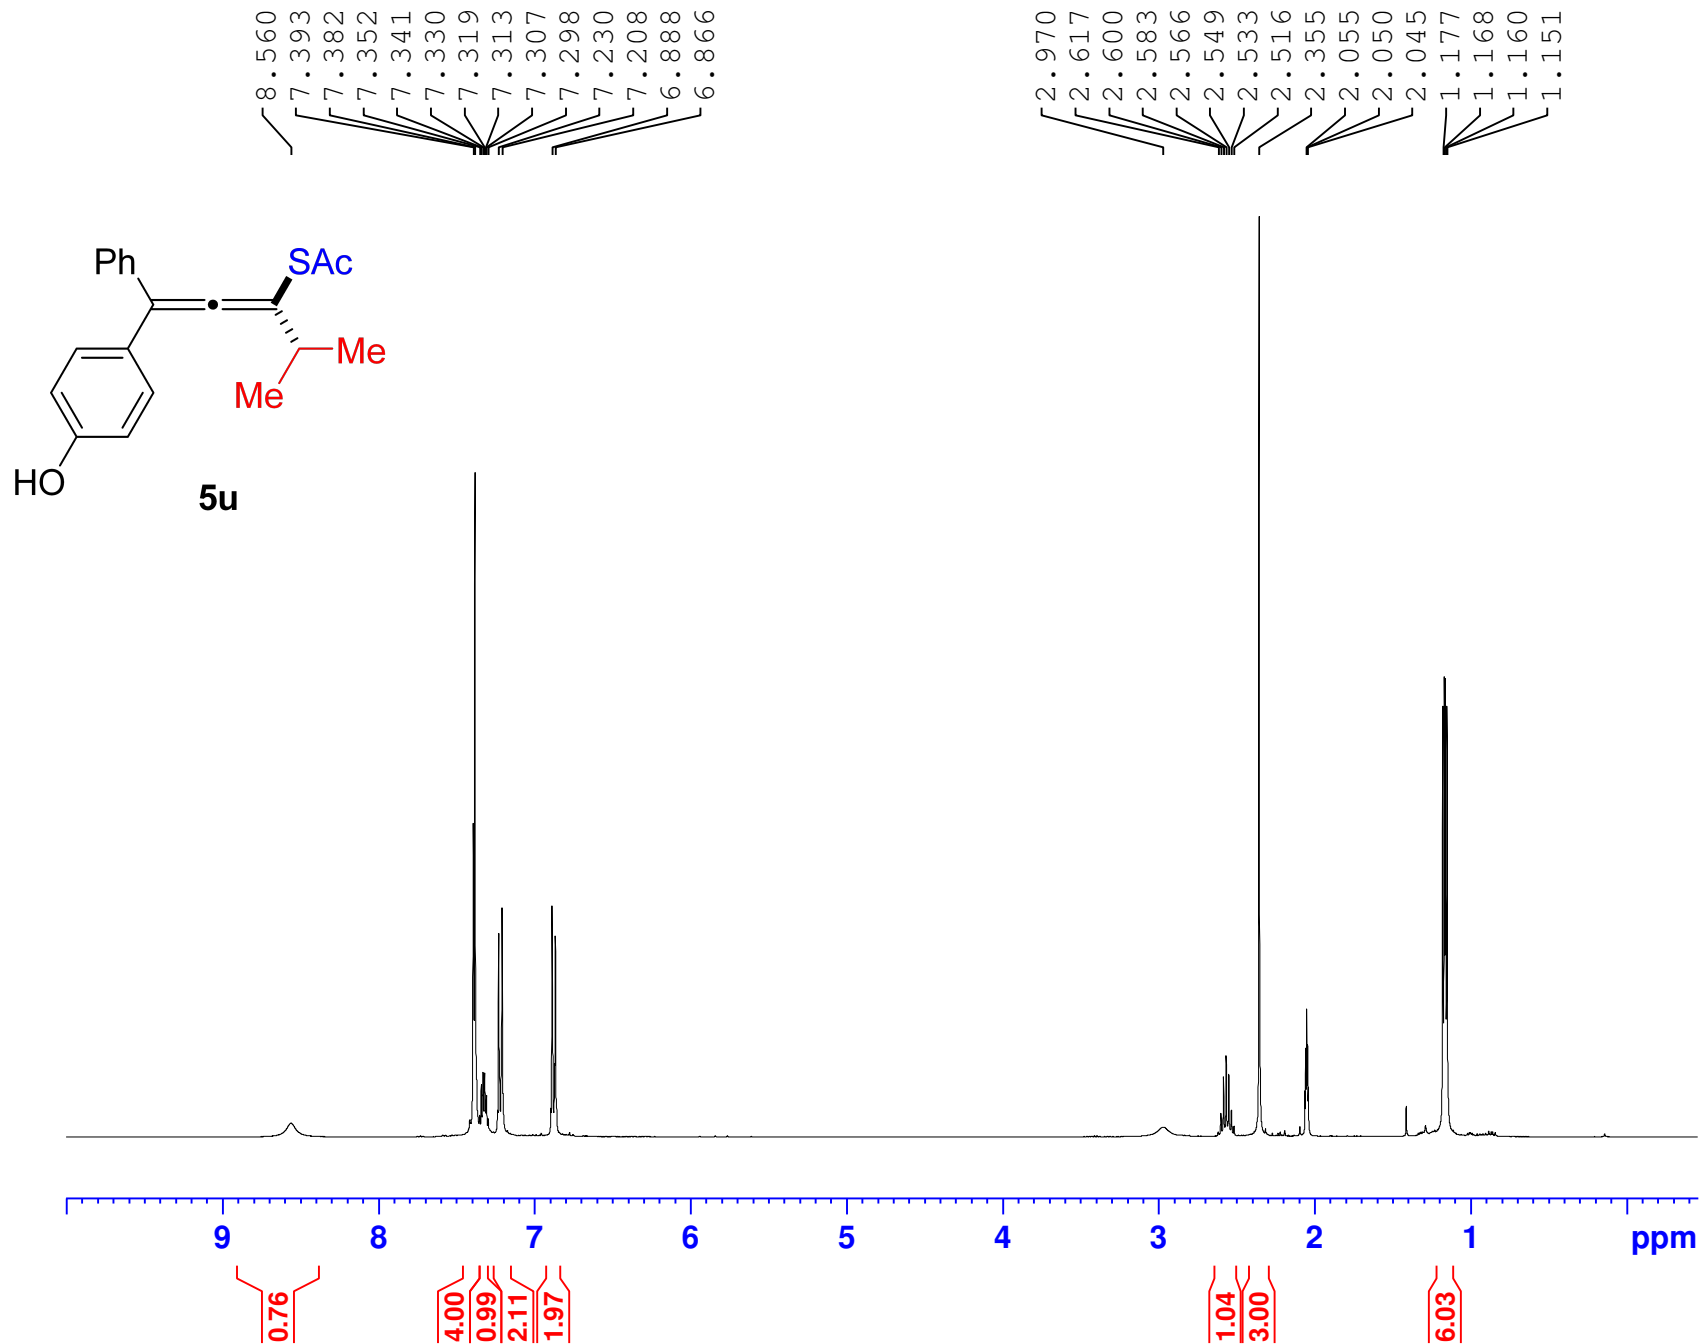

Current Data Parameters  
 NAME qdy-20012-1 H  
 EXPNO 1  
 PROCNO 2

F2 - Acquisition Parameters  
 Date\_ 20160401  
 Time 21.59  
 INSTRUM spect  
 PROBHD 5 mm PABBO BB/  
 PULPROG zg30  
 TD 65536  
 SOLVENT Acetone  
 NS 6  
 DS 0  
 SWH 8012.820 Hz  
 FIDRES 0.122266 Hz  
 AQ 4.0894465 sec  
 RG 62.93  
 DW 62.400 usec  
 DE 6.50 usec  
 TE 297.5 K  
 D1 1.00000000 sec  
 TD0 1

==== CHANNEL f1 =====  
 SFO1 400.1324710 MHz  
 NUC1 1H  
 P1 14.50 usec  
 PLW1 11.99499989 W

F2 - Processing parameters  
 SI 65536  
 SF 400.1300067 MHz  
 WDW EM  
 SSB 0  
 LB 0.30 Hz  
 GB 0  
 PC 1.00

Supplementary Figure 147. <sup>1</sup>H NMR spectrum for 5u



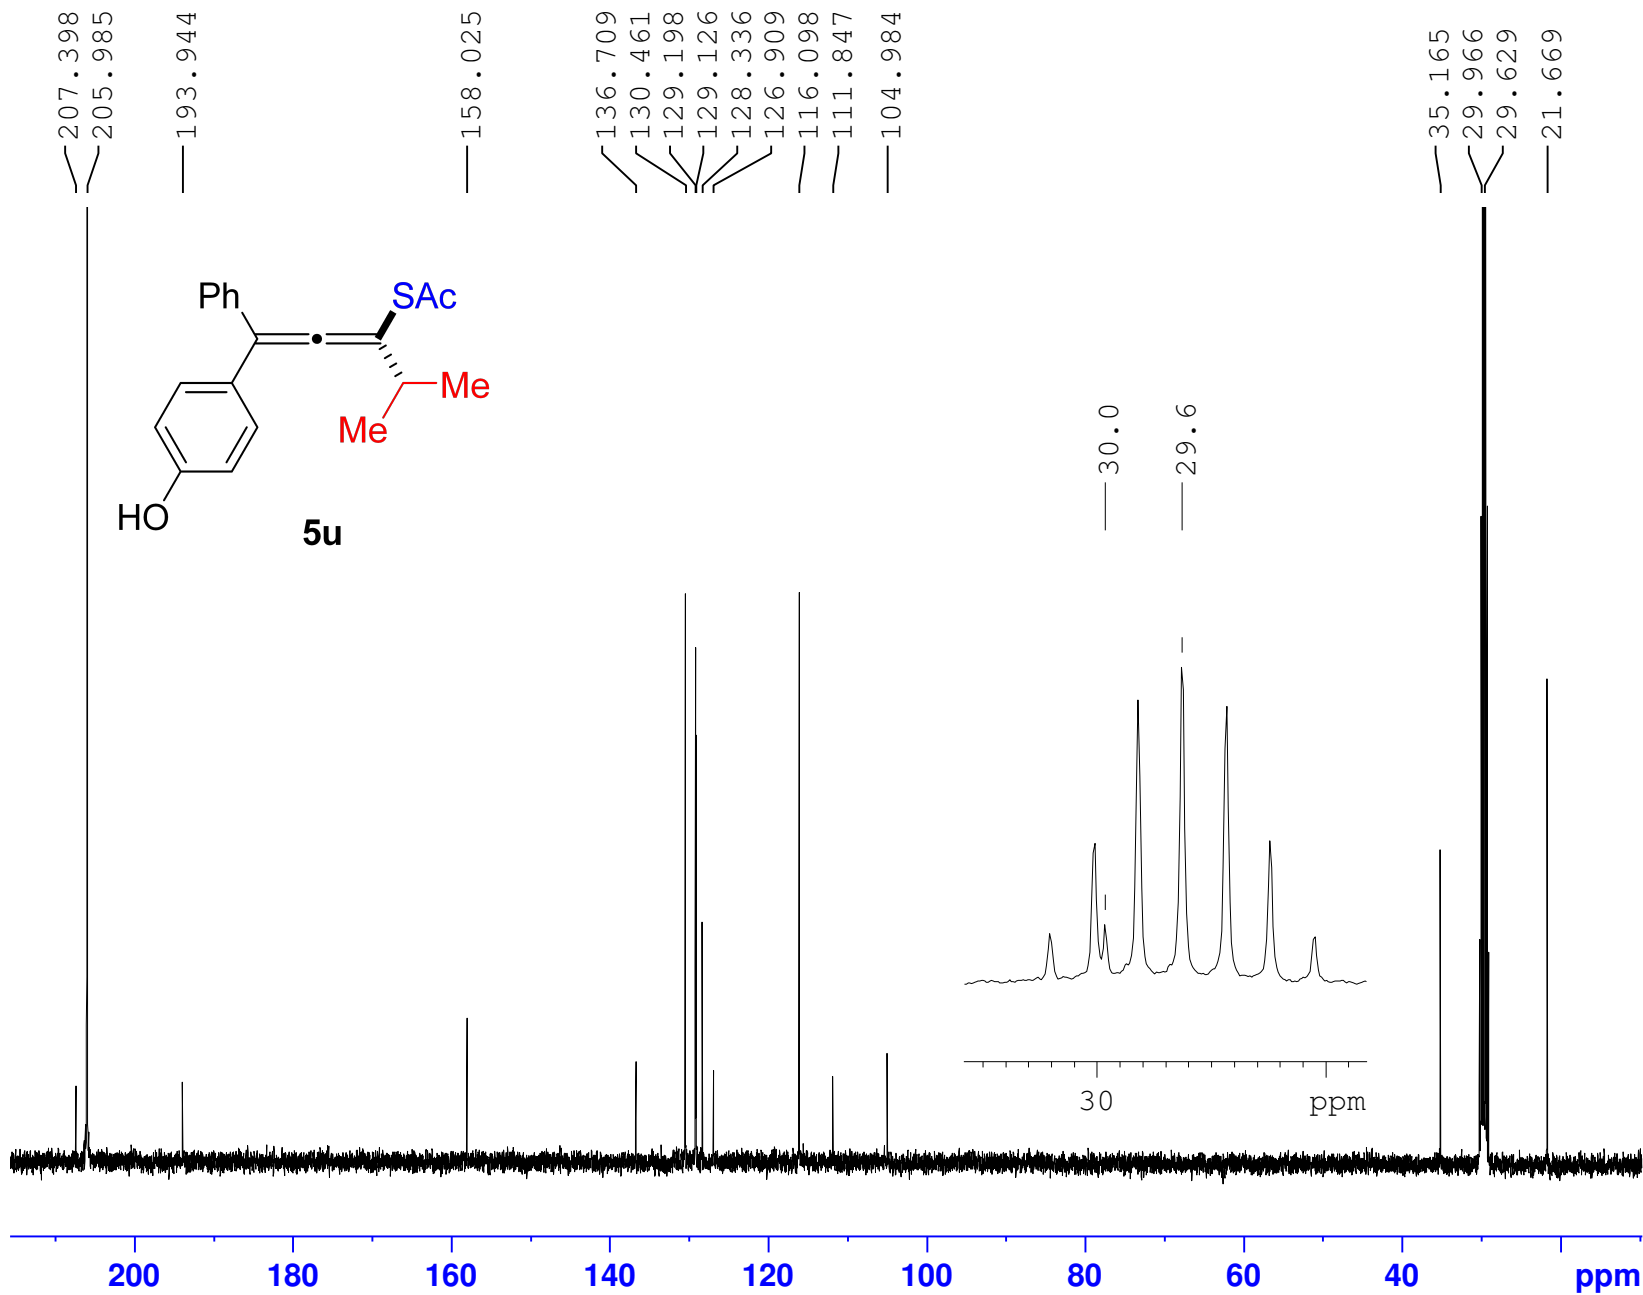

Current Data Parameters  
 NAME qdy-20012-1 C  
 EXPNO 1  
 PROCNO 2

F2 - Acquisition Parameters  
 Date\_ 20160401  
 Time 21.55  
 INSTRUM spect  
 PROBHD 5 mm PABBO BB/  
 PULPROG zgpg30  
 TD 65536  
 SOLVENT Acetone  
 NS 60  
 DS 0  
 SWH 24038.461 Hz  
 FIDRES 0.366798 Hz  
 AQ 1.3631488 sec  
 RG 196.92  
 DW 20.800 usec  
 DE 6.50 usec  
 TE 297.7 K  
 D1 2.00000000 sec  
 D11 0.03000000 sec  
 TD0 1

==== CHANNEL f1 =====  
 SFO1 100.6228298 MHz  
 NUC1 13C  
 P1 9.70 usec  
 PLW1 46.98899841 W

==== CHANNEL f2 =====  
 SFO2 400.1316005 MHz  
 NUC2 1H  
 CPDPRG[2] waltz16  
 PCPD2 90.00 usec  
 PLW2 11.99499989 W  
 PLW12 0.34213999 W  
 PLW13 0.27713001 W

F2 - Processing parameters  
 SI 32768  
 SF 100.6127029 MHz  
 WDW EM  
 SSB 0  
 LB 1.00 Hz  
 GB 0  
 PC 1.40

Supplementary Figure 148. <sup>13</sup>C NMR spectrum for 5u

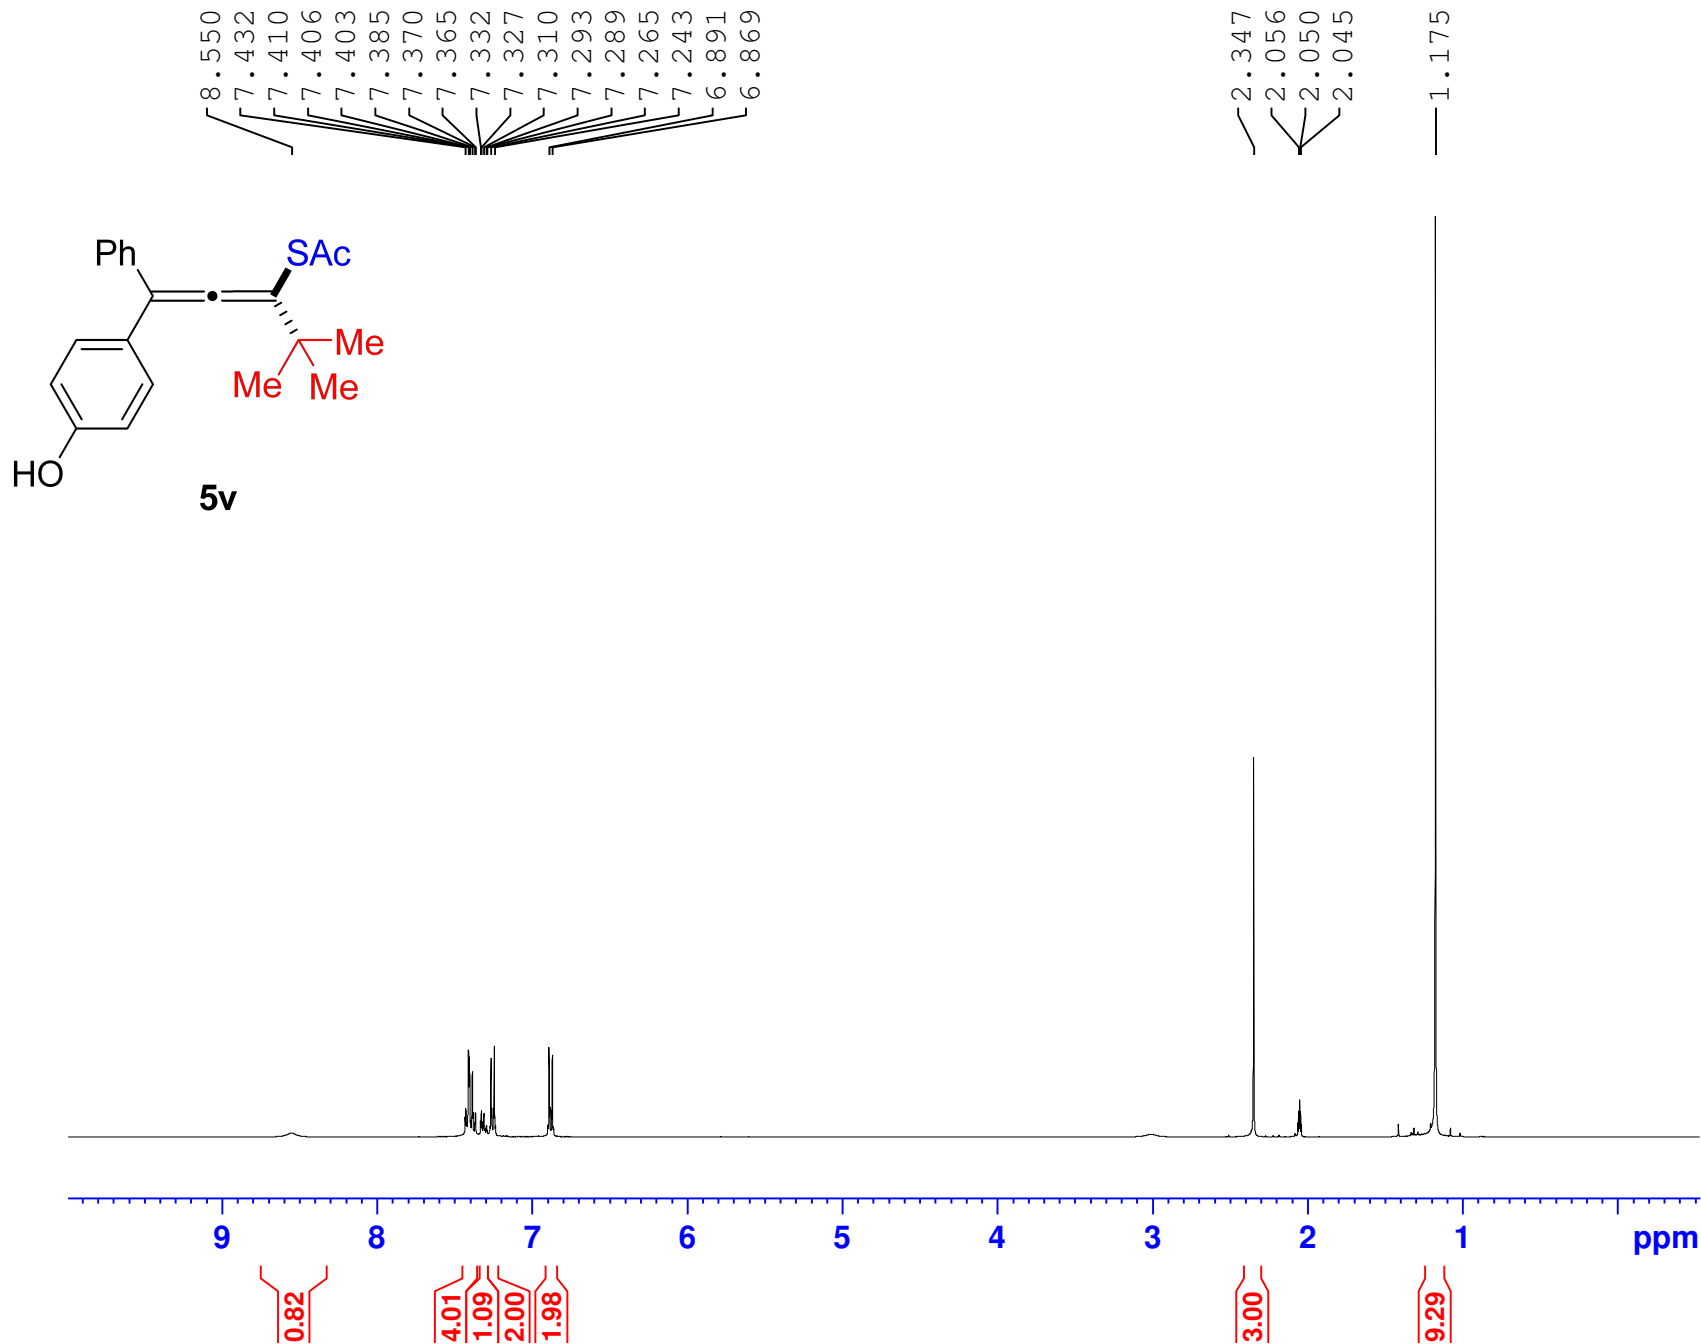

Current Data Parameters  
 NAME qdy-20099-2 H  
 EXPNO 1  
 PROCNO 1

F2 - Acquisition Parameters  
 Date\_ 20160402  
 Time 14.20  
 INSTRUM spect  
 PROBHD 5 mm PABBO BB/  
 PULPROG zg30  
 TD 65536  
 SOLVENT Acetone  
 NS 8  
 DS 0  
 SWH 8012.820 Hz  
 FIDRES 0.122266 Hz  
 AQ 4.0894465 sec  
 RG 70.97  
 DW 62.400 usec  
 DE 6.50 usec  
 TE 298.1 K  
 D1 1.00000000 sec  
 TD0 1

==== CHANNEL f1 =====  
 SFO1 400.1324710 MHz  
 NUC1 1H  
 P1 14.50 usec  
 PLW1 11.99499989 W

F2 - Processing parameters  
 SI 65536  
 SF 400.1300067 MHz  
 WDW EM  
 SSB 0  
 LB 0.30 Hz  
 GB 0  
 PC 1.00

Supplementary Figure 149. <sup>1</sup>H NMR spectrum for 5v

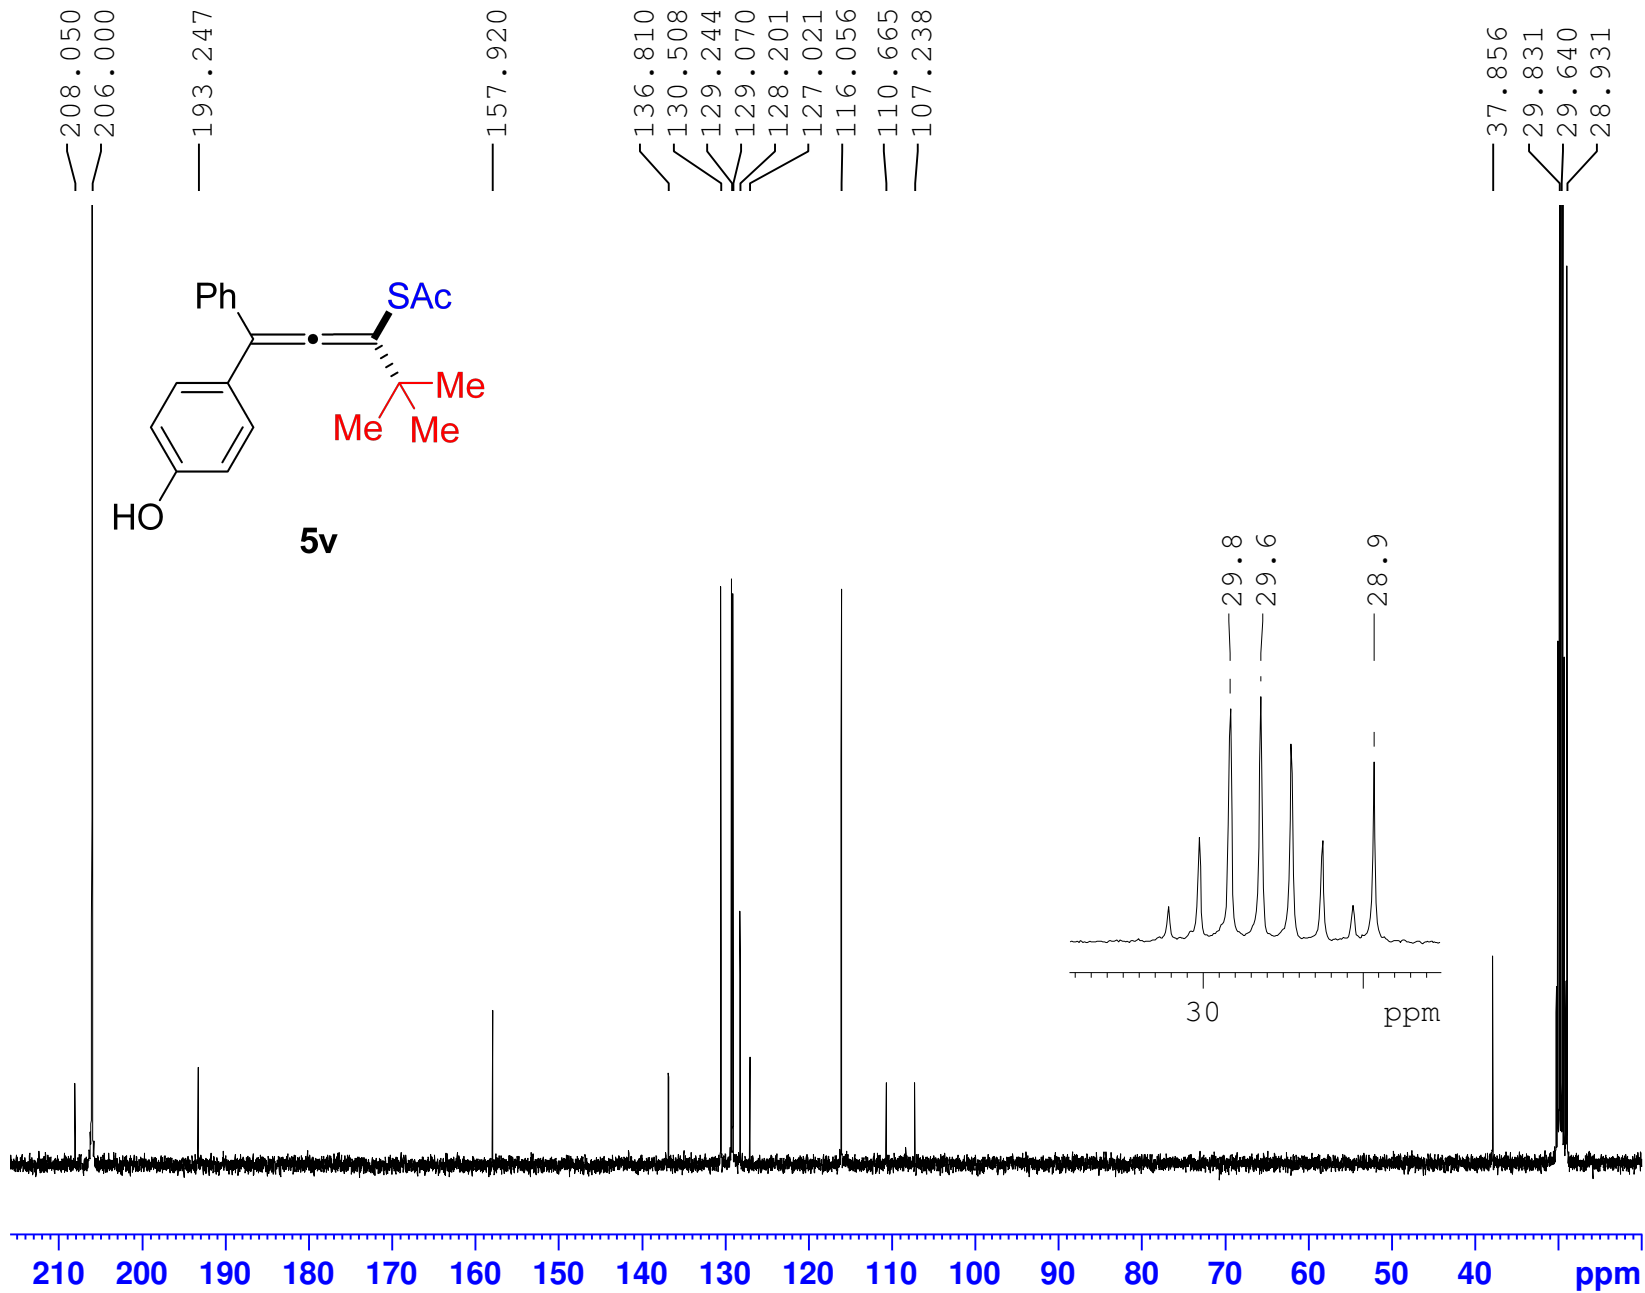

Current Data Parameters  
 NAME qdy-20099-2 C  
 EXPNO 1  
 PROCNO 1

F2 - Acquisition Parameters  
 Date\_ 20160402  
 Time 14.14  
 INSTRUM spect  
 PROBHD 5 mm PABBO BB/  
 PULPROG zgpg30  
 TD 65536  
 SOLVENT Acetone  
 NS 130  
 DS 0  
 SWH 24038.461 Hz  
 FIDRES 0.366798 Hz  
 AQ 1.3631488 sec  
 RG 196.92  
 DW 20.800 usec  
 DE 6.50 usec  
 TE 298.8 K  
 D1 2.00000000 sec  
 D11 0.03000000 sec  
 TD0 1

==== CHANNEL f1 =====  
 SFO1 100.6228298 MHz  
 NUC1 13C  
 P1 9.70 usec  
 PLW1 46.98899841 W

==== CHANNEL f2 =====  
 SFO2 400.1316005 MHz  
 NUC2 1H  
 CPDPRG[2] waltz16  
 PCPD2 90.00 usec  
 PLW2 11.99499989 W  
 PLW12 0.34213999 W  
 PLW13 0.27713001 W

F2 - Processing parameters  
 SI 32768  
 SF 100.6127029 MHz  
 WDW EM  
 SSB 0  
 LB 1.00 Hz  
 GB 0  
 PC 1.40

Supplementary Figure 150. <sup>13</sup>C NMR spectrum for **5v**

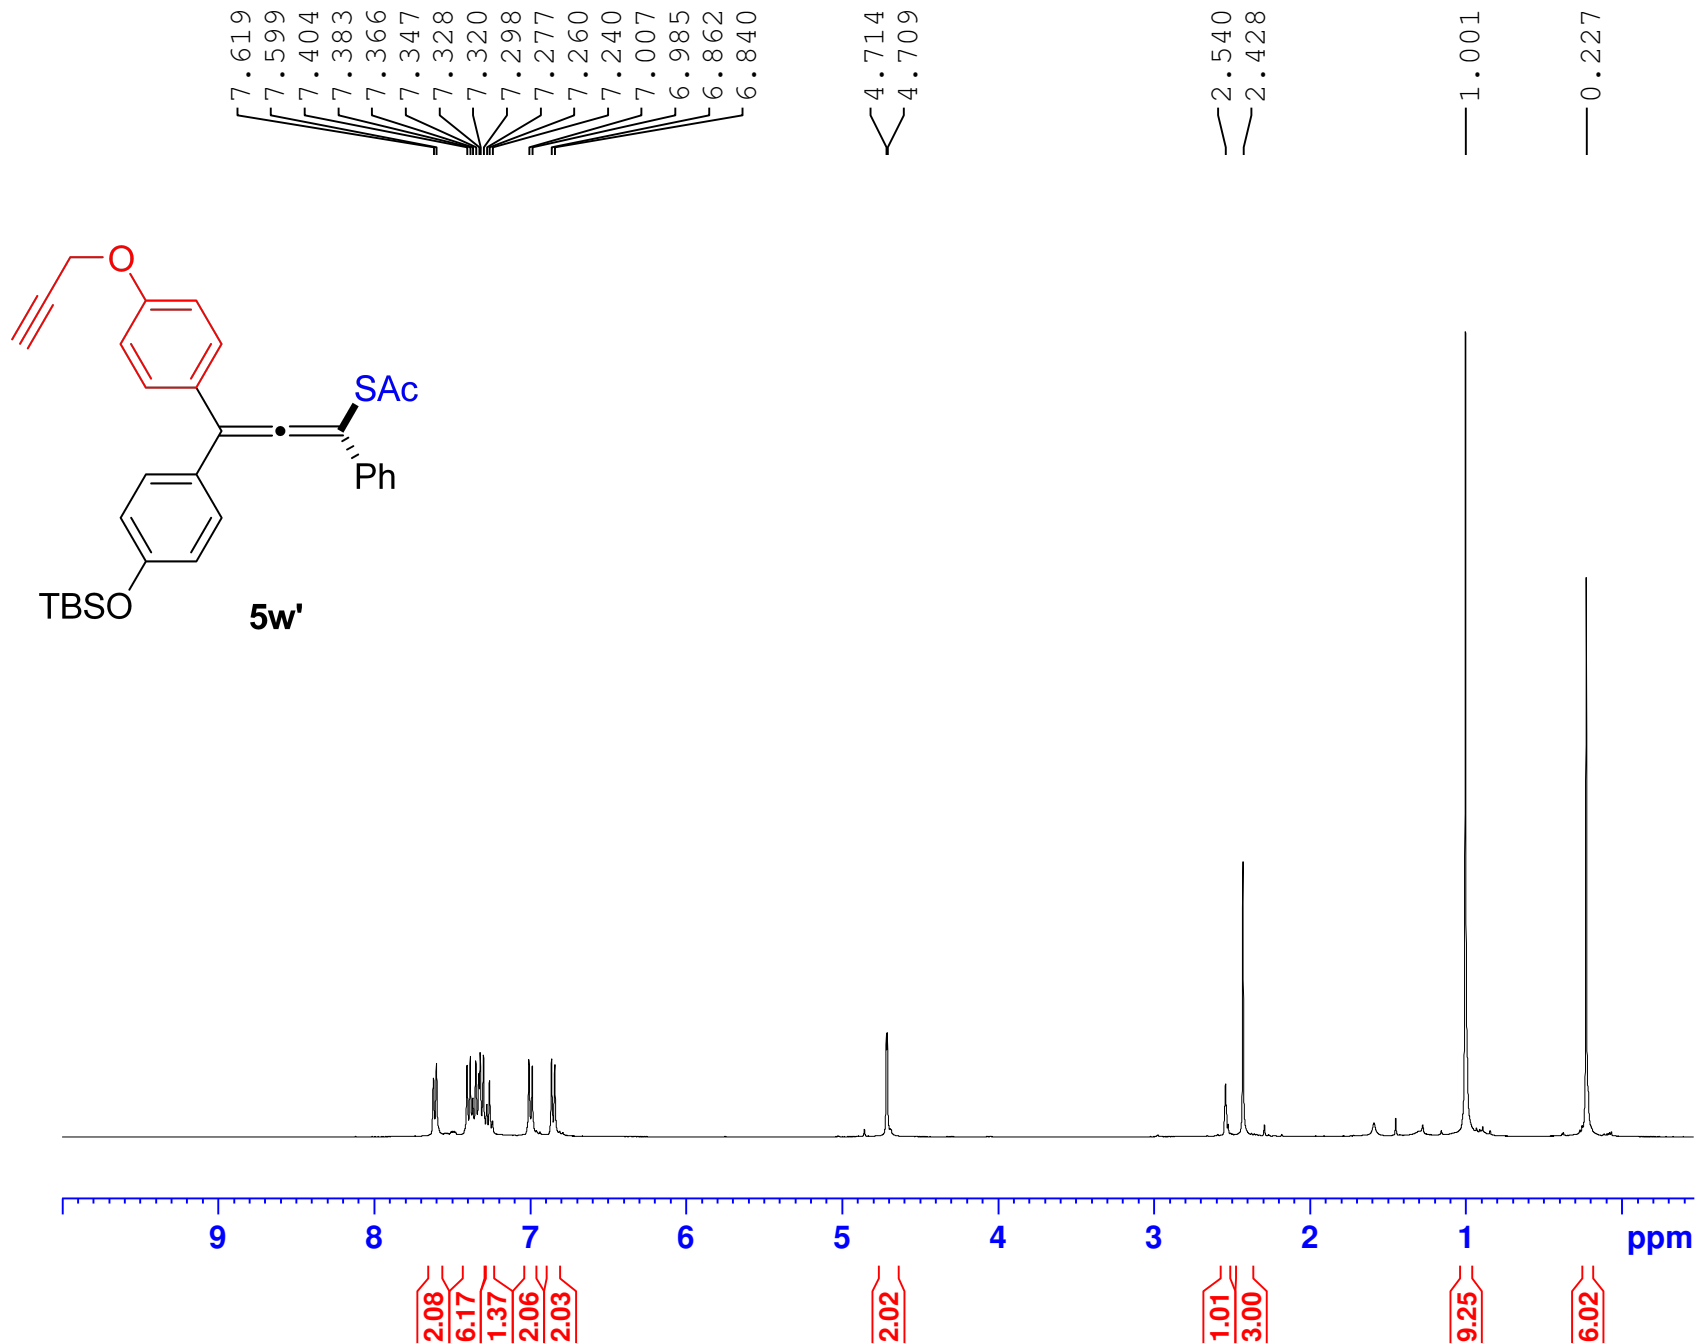

Current Data Parameters  
 NAME qdy-20160-2 H  
 EXPNO 1  
 PROCNO 1

F2 - Acquisition Parameters  
 Date\_ 20160525  
 Time 13.41  
 INSTRUM spect  
 PROBHD 5 mm PABBO BB/  
 PULPROG zg30  
 TD 65536  
 SOLVENT CDC13  
 NS 5  
 DS 0  
 SWH 8012.820 Hz  
 FIDRES 0.122266 Hz  
 AQ 4.0894465 sec  
 RG 49.32  
 DW 62.400 usec  
 DE 6.50 usec  
 TE 297.9 K  
 D1 1.00000000 sec  
 TD0 1

===== CHANNEL f1 =====  
 SFO1 400.1324710 MHz  
 NUC1 1H  
 P1 14.50 usec  
 PLW1 11.99499989 W

F2 - Processing parameters  
 SI 65536  
 SF 400.1300089 MHz  
 WDW EM  
 SSB 0  
 LB 0.30 Hz  
 GB 0  
 PC 1.00

Supplementary Figure 151. <sup>1</sup>H NMR spectrum for 5w'

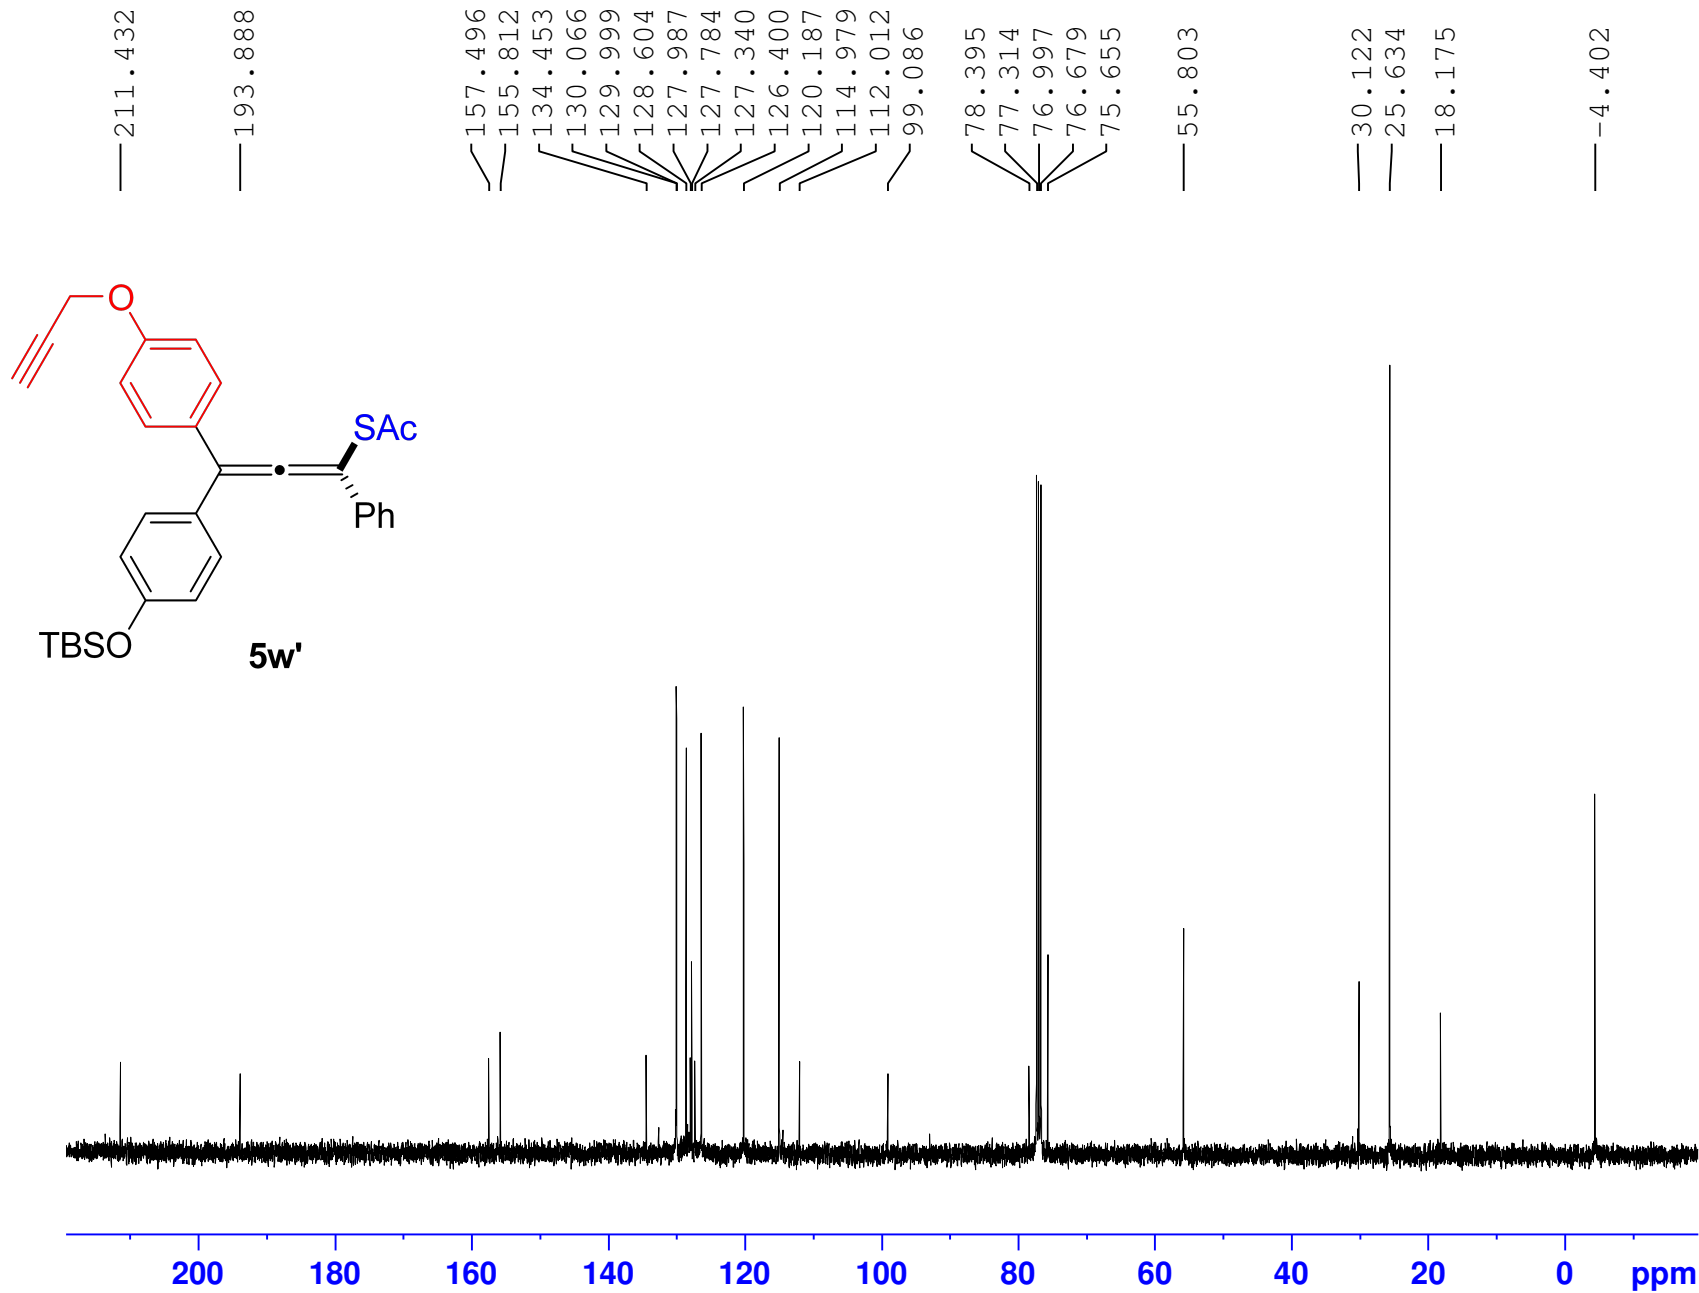

Current Data Parameters  
 NAME qdy-20160-2 C  
 EXPNO 1  
 PROCNO 1

F2 - Acquisition Parameters  
 Date\_ 20160525  
 Time 13.45  
 INSTRUM spect  
 PROBHD 5 mm PABBO BB/  
 PULPROG zgpg30  
 TD 65536  
 SOLVENT CDC13  
 NS 126  
 DS 0  
 SWH 24038.461 Hz  
 FIDRES 0.366798 Hz  
 AQ 1.3631488 sec  
 RG 196.92  
 DW 20.800 usec  
 DE 6.50 usec  
 TE 299.0 K  
 D1 2.00000000 sec  
 D11 0.03000000 sec  
 TD0 1

==== CHANNEL f1 =====  
 SFO1 100.6228298 MHz  
 NUC1 13C  
 P1 9.70 usec  
 PLW1 46.98899841 W

==== CHANNEL f2 =====  
 SFO2 400.1316005 MHz  
 NUC2 1H  
 CPDPRG[2] waltz16  
 PCPD2 90.00 usec  
 PLW2 11.99499989 W  
 PLW12 0.34213999 W  
 PLW13 0.27713001 W

F2 - Processing parameters  
 SI 32768  
 SF 100.6127744 MHz  
 WDW EM  
 SSB 0  
 LB 1.00 Hz  
 GB 0  
 PC 1.40

Supplementary Figure 152. <sup>13</sup>C NMR spectrum for 5w'

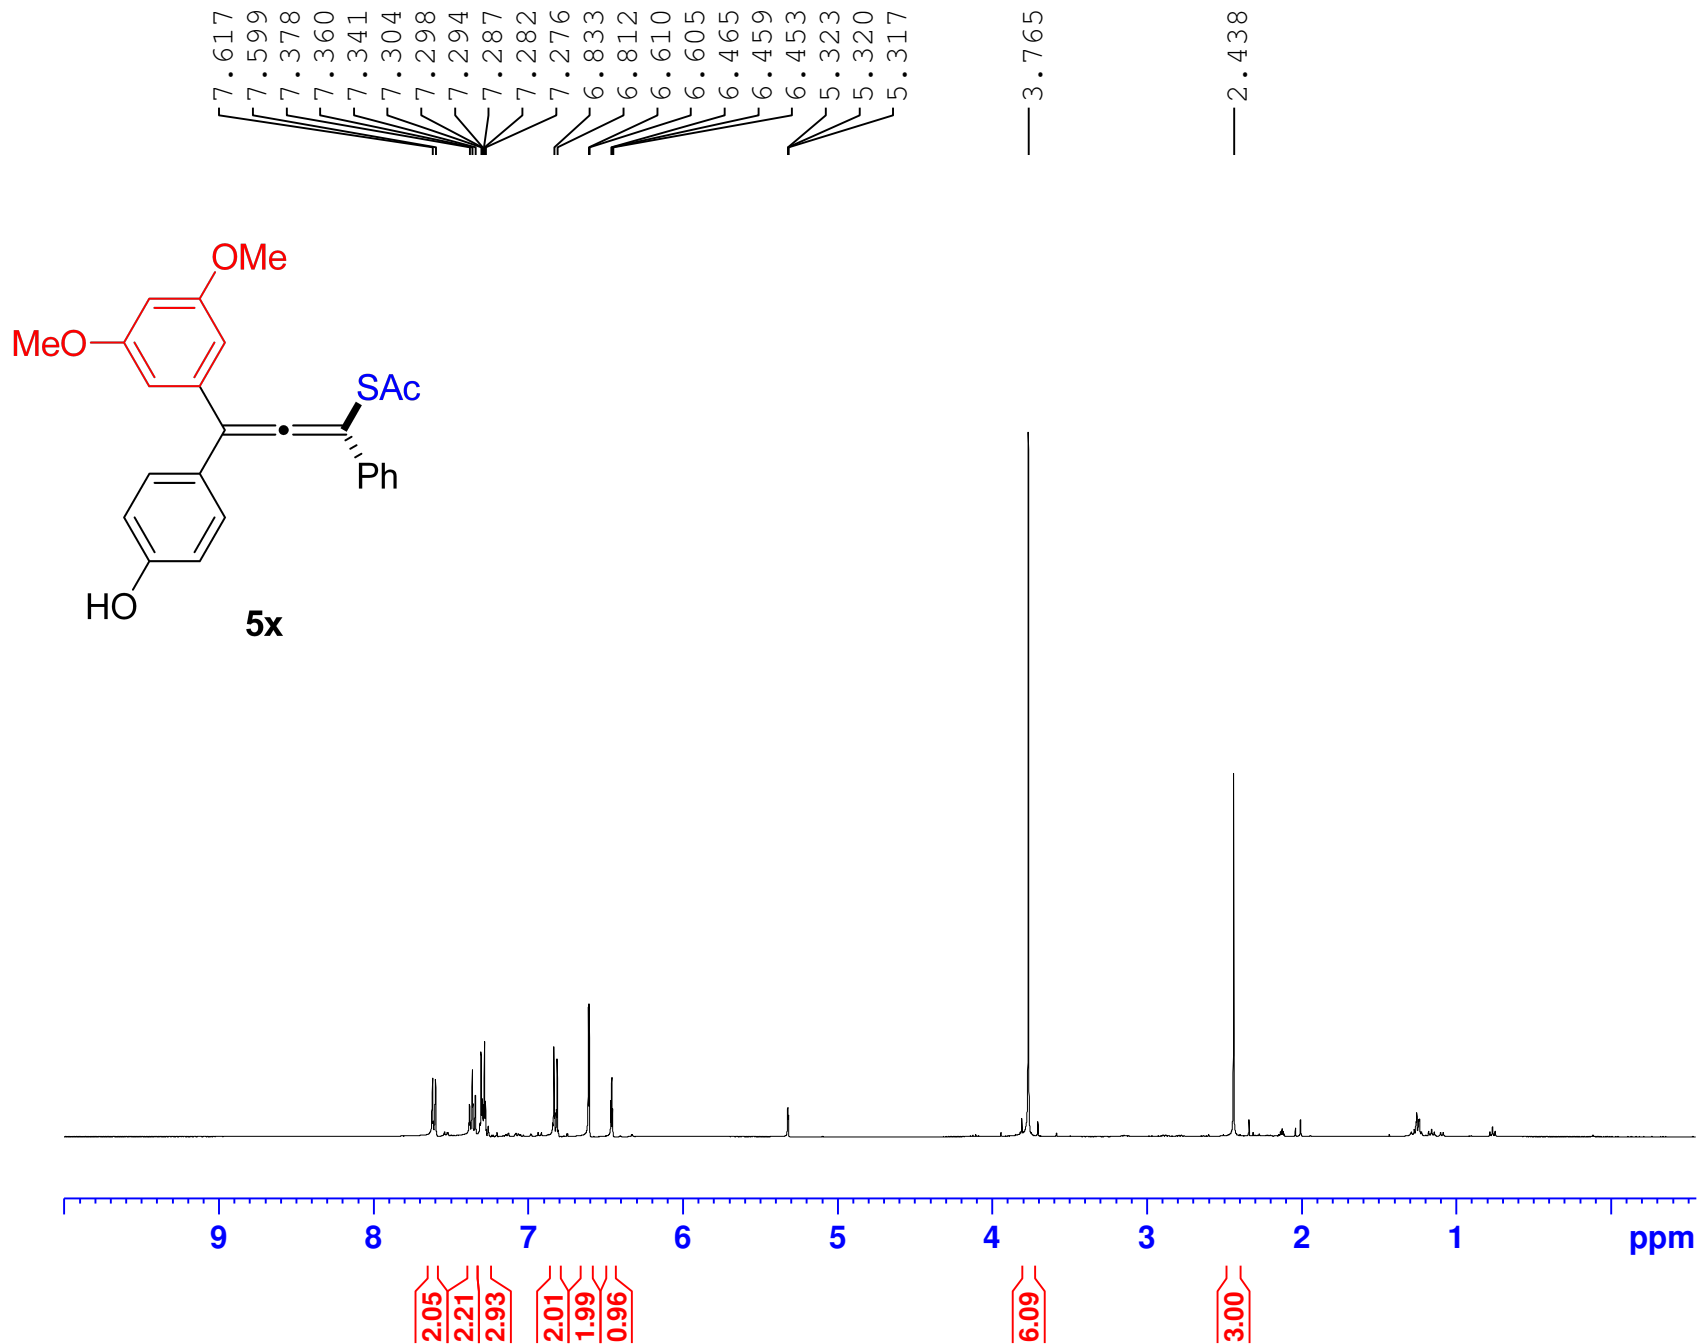

Current Data Parameters  
 NAME qdy-20131-2-H  
 EXPNO 2  
 PROCNO 1

F2 - Acquisition Parameters  
 Date\_ 20160508  
 Time 21.47  
 INSTRUM spect  
 PROBHD 5 mm PABBO BB/  
 PULPROG zg30  
 TD 65536  
 SOLVENT CD2C12  
 NS 4  
 DS 0  
 SWH 8012.820 Hz  
 FIDRES 0.122266 Hz  
 AQ 4.0894465 sec  
 RG 62.93  
 DW 62.400 usec  
 DE 6.50 usec  
 TE 299.0 K  
 D1 1.00000000 sec  
 TD0 1

==== CHANNEL f1 =====  
 SFO1 400.1324710 MHz  
 NUC1 1H  
 P1 14.50 usec  
 PLW1 11.99499989 W

F2 - Processing parameters  
 SI 65536  
 SF 400.1300152 MHz  
 WDW EM  
 SSB 0  
 LB 0.30 Hz  
 GB 0  
 PC 1.00

Supplementary Figure 153. <sup>1</sup>H NMR spectrum for 5x

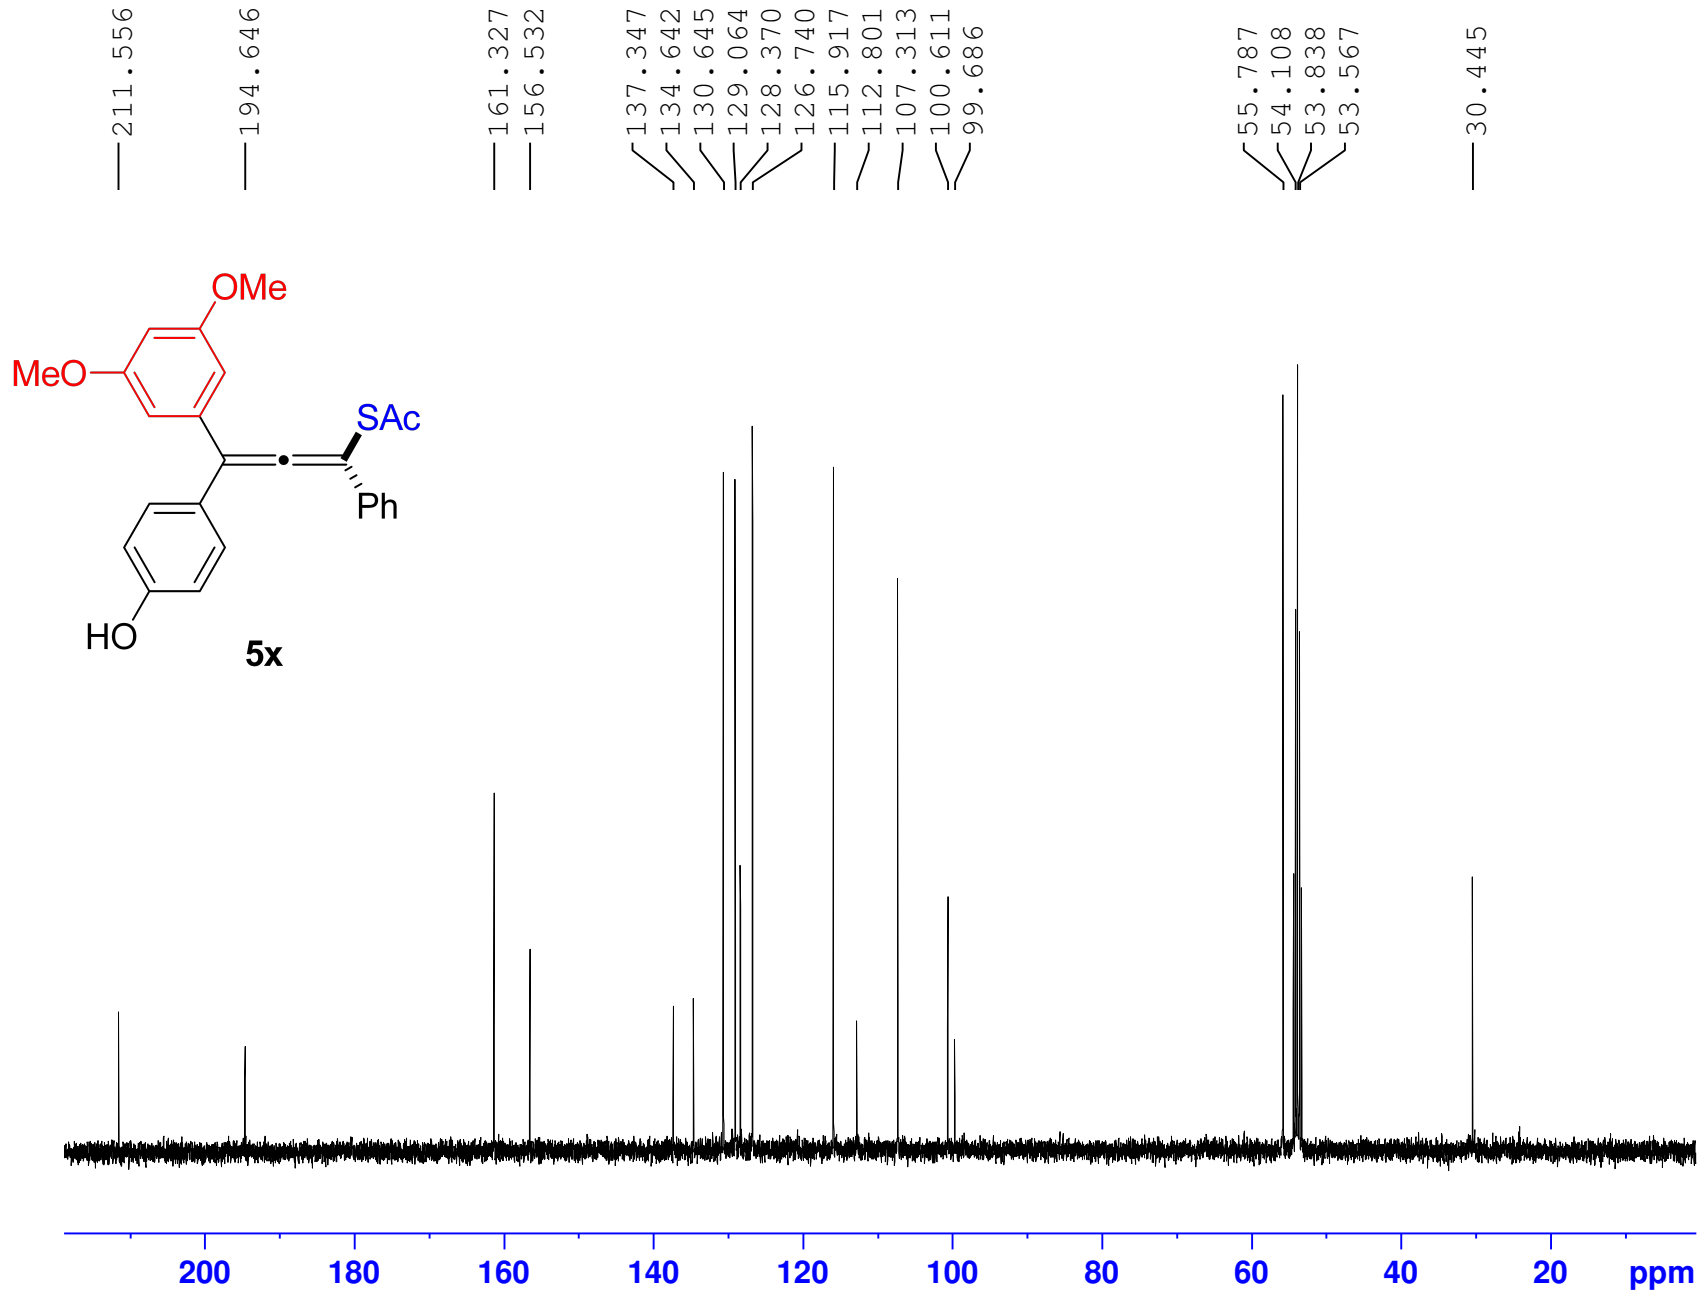

Current Data Parameters  
 NAME qdy-20131-2 C  
 EXPNO 1  
 PROCNO 1

F2 - Acquisition Parameters  
 Date\_ 20160429  
 Time 19.23  
 INSTRUM spect  
 PROBHD 5 mm PABBO BB/  
 PULPROG zgpg30  
 TD 65536  
 SOLVENT CD2C12  
 NS 188  
 DS 0  
 SWH 24038.461 Hz  
 FIDRES 0.366798 Hz  
 AQ 1.3631488 sec  
 RG 196.92  
 DW 20.800 usec  
 DE 6.50 usec  
 TE 297.7 K  
 D1 2.00000000 sec  
 D11 0.03000000 sec  
 TD0 1

==== CHANNEL f1 =====  
 SFO1 100.6228298 MHz  
 NUC1 13C  
 P1 9.70 usec  
 PLW1 46.98899841 W

==== CHANNEL f2 =====  
 SFO2 400.1316005 MHz  
 NUC2 1H  
 CPDPRG[2] waltz16  
 PCPD2 90.00 usec  
 PLW2 11.99499989 W  
 PLW12 0.34213999 W  
 PLW13 0.27713001 W

F2 - Processing parameters  
 SI 32768  
 SF 100.6127299 MHz  
 WDW EM  
 SSB 0  
 LB 1.00 Hz  
 GB 0  
 PC 1.40

**Supplementary Figure 154. <sup>13</sup>C NMR spectrum for 5x**

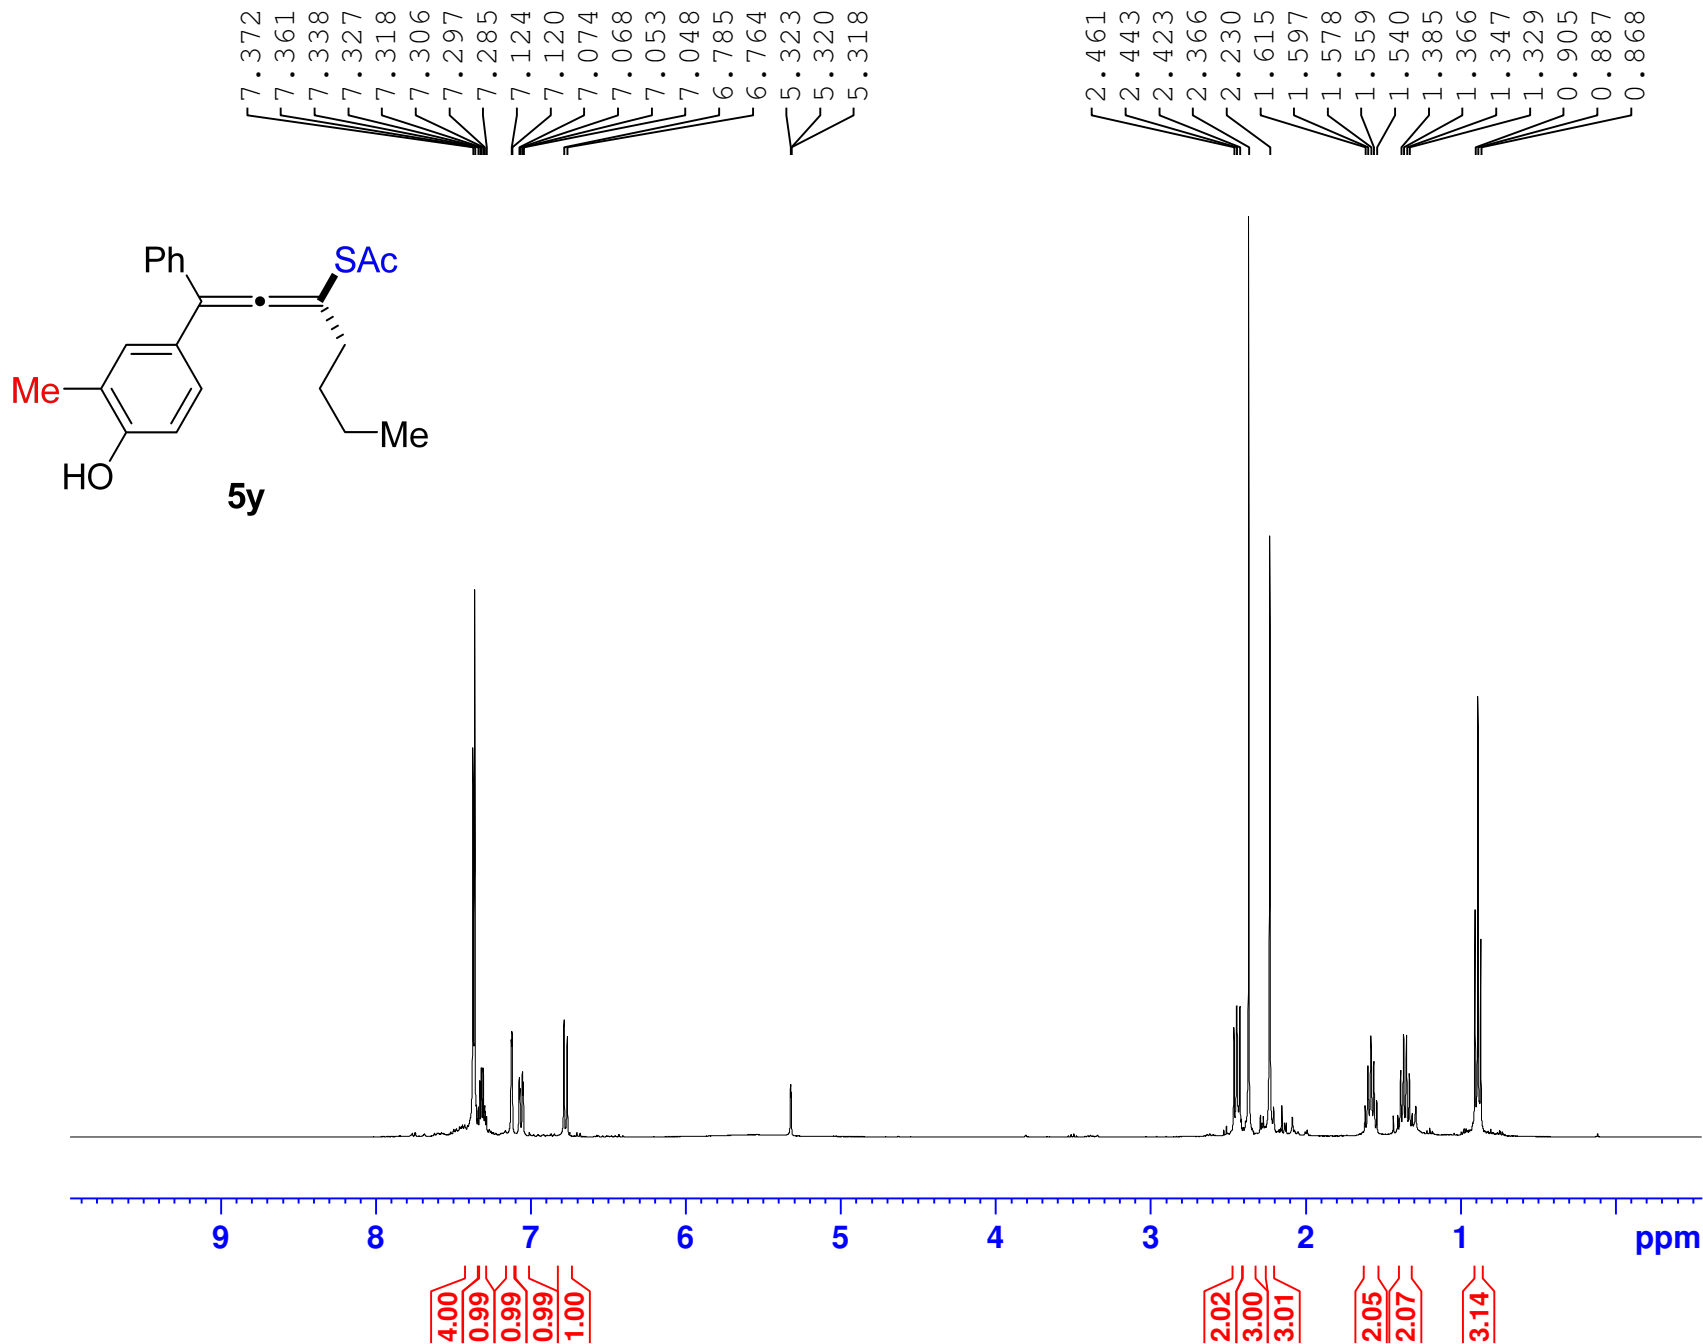

Current Data Parameters  
 NAME qdy-20140-1 H  
 EXPNO 1  
 PROCNO 1

F2 - Acquisition Parameters  
 Date\_ 20160508  
 Time 21.34  
 INSTRUM spect  
 PROBHD 5 mm PABBO BB/  
 PULPROG zg30  
 TD 65536  
 SOLVENT CD2C12  
 NS 4  
 DS 0  
 SWH 8012.820 Hz  
 FIDRES 0.122266 Hz  
 AQ 4.0894465 sec  
 RG 49.32  
 DW 62.400 usec  
 DE 6.50 usec  
 TE 298.7 K  
 D1 1.00000000 sec  
 TD0 1

===== CHANNEL f1 =====  
 SFO1 400.1324710 MHz  
 NUC1 1H  
 P1 14.50 usec  
 PLW1 11.99499989 W

F2 - Processing parameters  
 SI 65536  
 SF 400.1300152 MHz  
 WDW EM  
 SSB 0  
 LB 0.30 Hz  
 GB 0  
 PC 1.00

**Supplementary Figure 155. <sup>1</sup>H NMR spectrum for 5y**



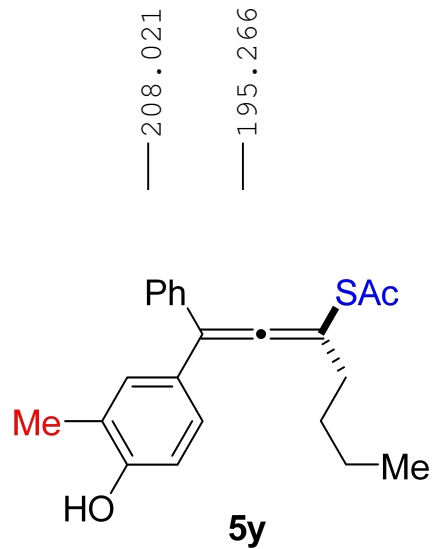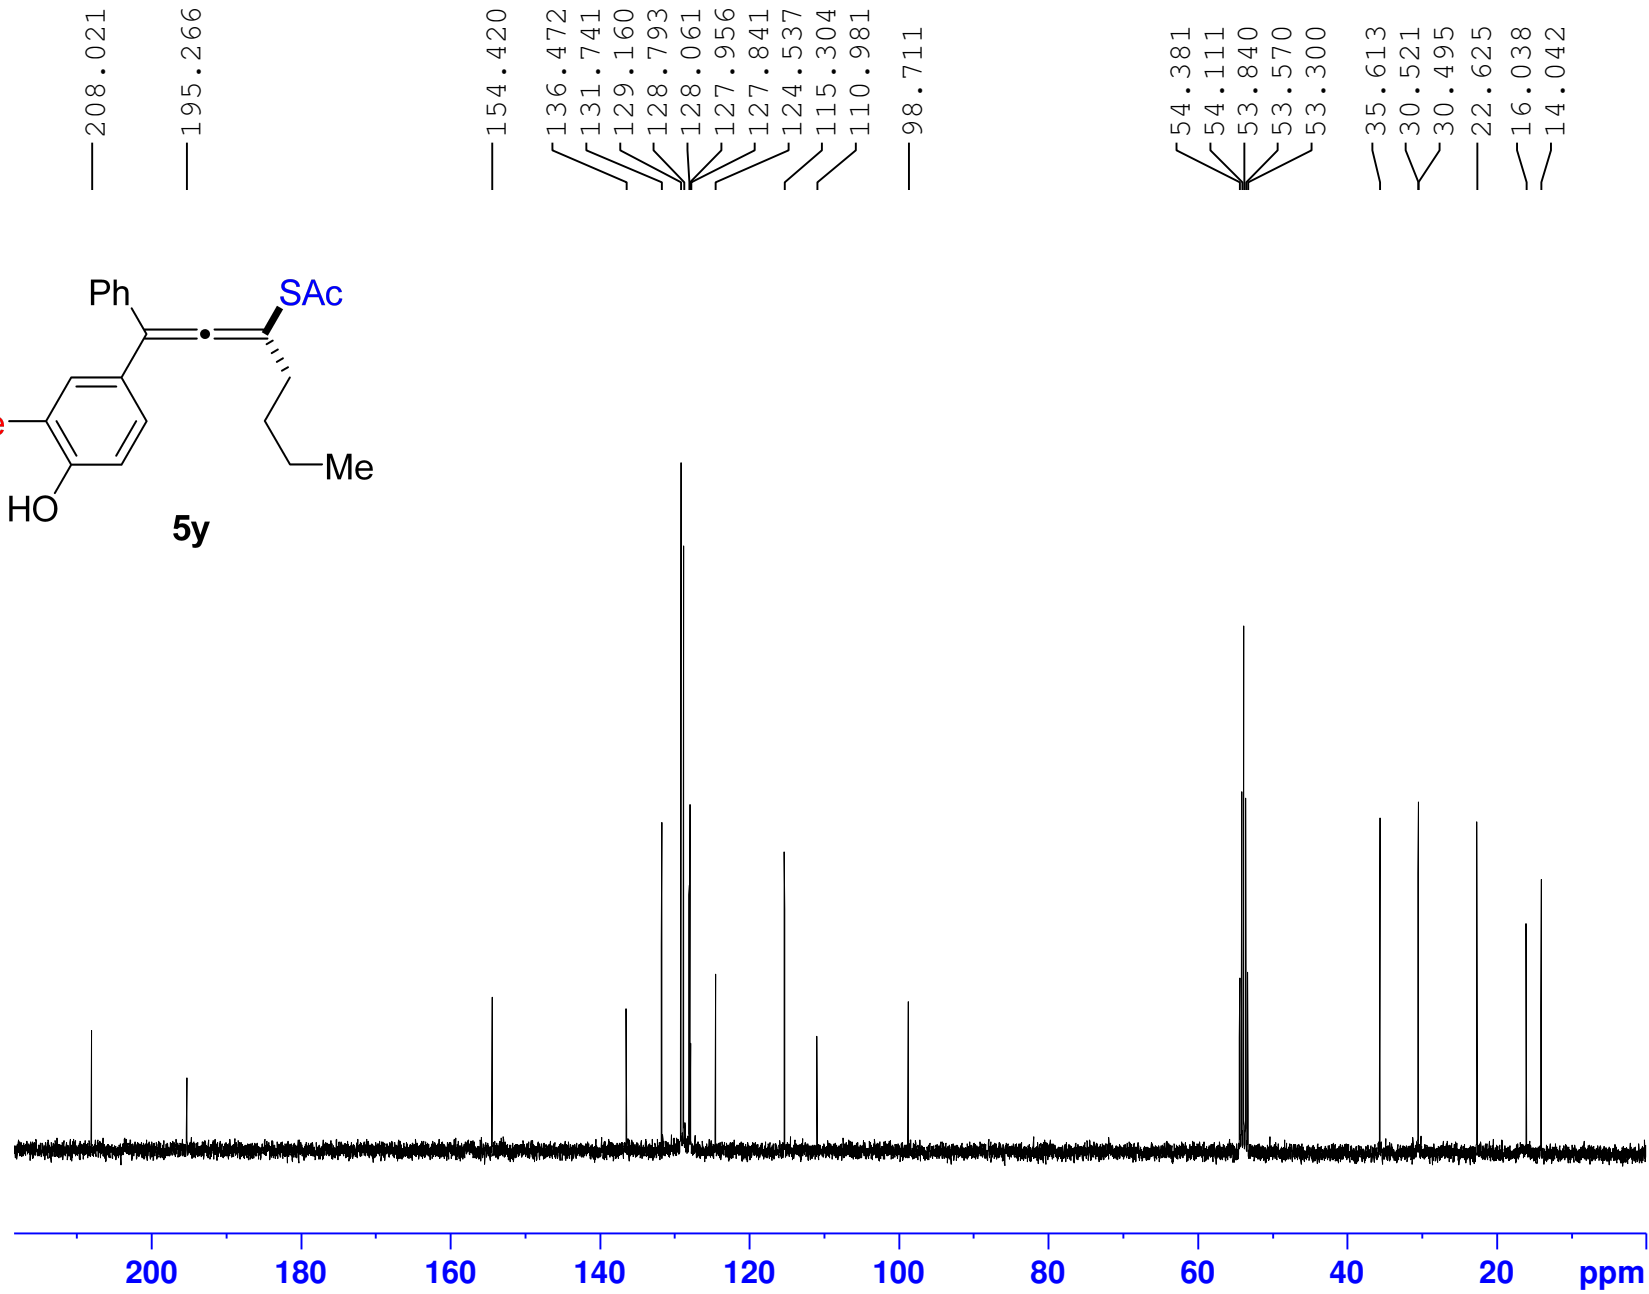

Current Data Parameters  
 NAME qdy-20140-1 C  
 EXPNO 1  
 PROCNO 1

F2 - Acquisition Parameters  
 Date\_ 20160508  
 Time 21.39  
 INSTRUM spect  
 PROBHD 5 mm PABBO BB/  
 PULPROG zgpg30  
 TD 65536  
 SOLVENT CD2C12  
 NS 149  
 DS 0  
 SWH 24038.461 Hz  
 FIDRES 0.366798 Hz  
 AQ 1.3631488 sec  
 RG 196.92  
 DW 20.800 usec  
 DE 6.50 usec  
 TE 299.6 K  
 D1 2.00000000 sec  
 D11 0.03000000 sec  
 TD0 1

==== CHANNEL f1 =====  
 SFO1 100.6228298 MHz  
 NUC1 13C  
 P1 9.70 usec  
 PLW1 46.98899841 W

==== CHANNEL f2 =====  
 SFO2 400.1316005 MHz  
 NUC2 1H  
 CPDPRG[2] waltz16  
 PCPD2 90.00 usec  
 PLW2 11.99499989 W  
 PLW12 0.34213999 W  
 PLW13 0.27713001 W

F2 - Processing parameters  
 SI 32768  
 SF 100.6127262 MHz  
 WDW EM  
 SSB 0  
 LB 1.00 Hz  
 GB 0  
 PC 1.40

**Supplementary Figure 156. <sup>13</sup>C NMR spectrum for 5y**

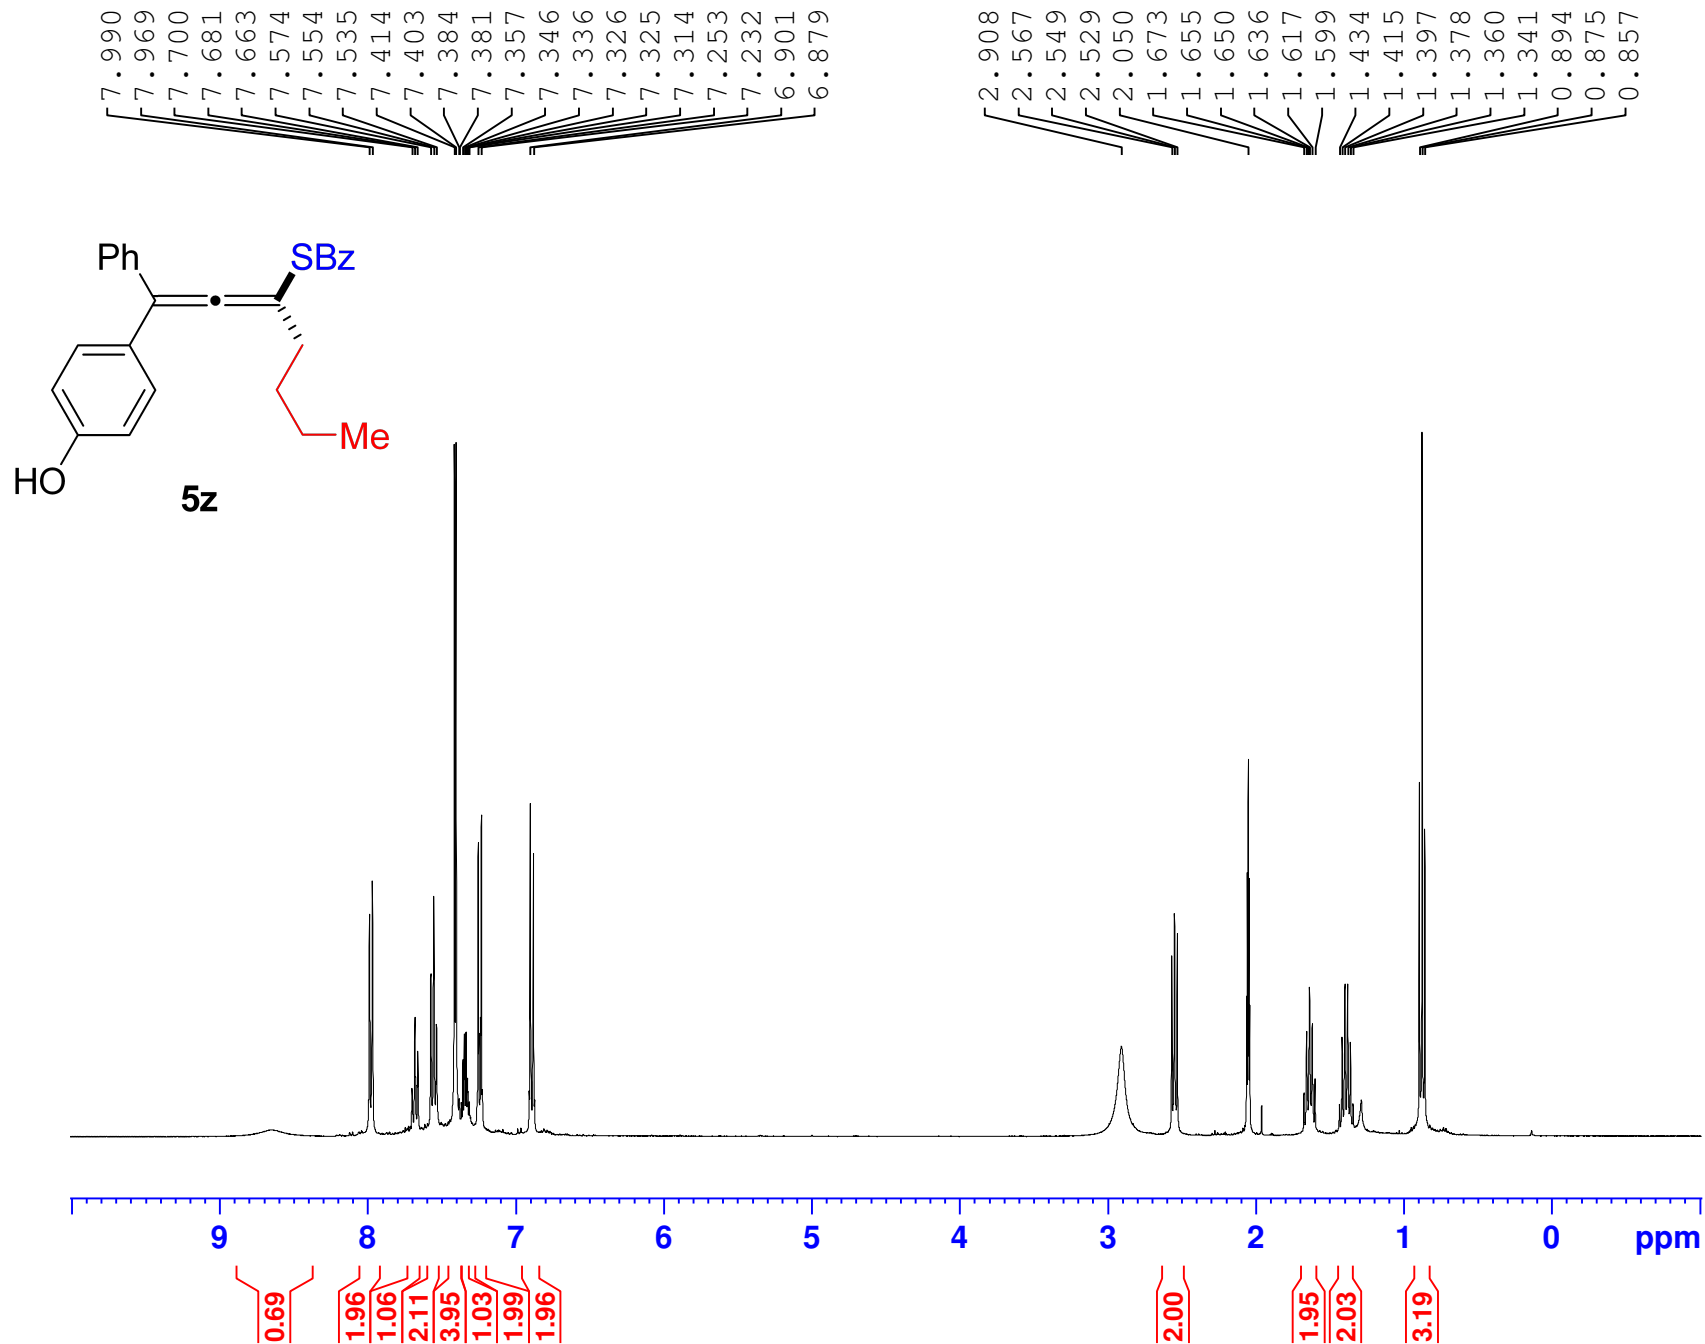

Current Data Parameters  
 NAME qdy-30054 H  
 EXPNO 2  
 PROCNO 1

F2 - Acquisition Parameters  
 Date\_ 20160816  
 Time 13.36  
 INSTRUM spect  
 PROBHD 5 mm PABBO BB/  
 PULPROG zg30  
 TD 65536  
 SOLVENT Acetone  
 NS 6  
 DS 0  
 SWH 8012.820 Hz  
 FIDRES 0.122266 Hz  
 AQ 4.0894465 sec  
 RG 82.92  
 DW 62.400 usec  
 DE 6.50 usec  
 TE 298.9 K  
 D1 1.00000000 sec  
 TD0 1

==== CHANNEL f1 =====  
 SFO1 400.1324710 MHz  
 NUC1 1H  
 P1 14.50 usec  
 PLW1 11.99499989 W

F2 - Processing parameters  
 SI 65536  
 SF 400.1300067 MHz  
 WDW EM  
 SSB 0  
 LB 0.30 Hz  
 GB 0  
 PC 1.00

**Supplementary Figure 157. <sup>1</sup>H NMR spectrum for 5z**

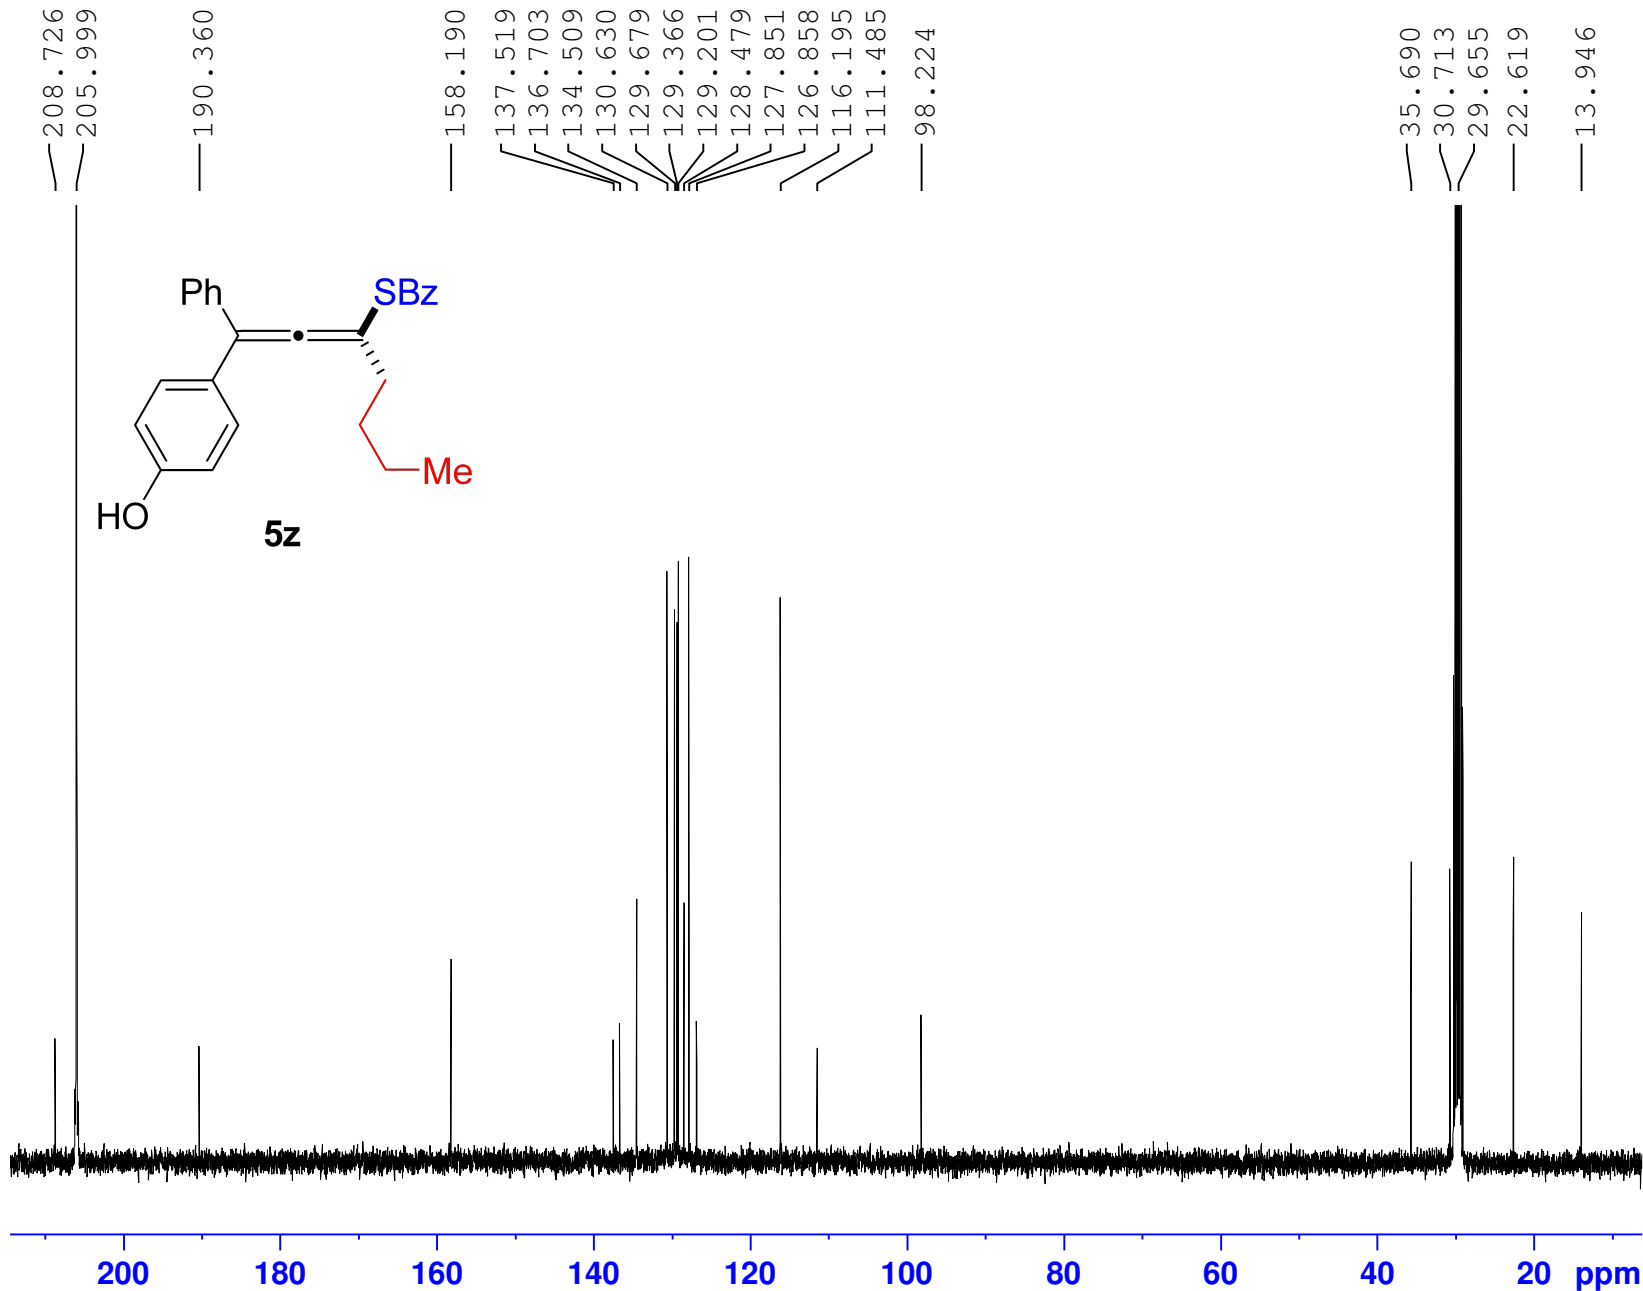

Current Data Parameters  
 NAME qdy-30054 C  
 EXPNO 1  
 PROCNO 1

F2 - Acquisition Parameters  
 Date\_ 20160815  
 Time 21.56  
 INSTRUM spect  
 PROBHD 5 mm PABBO BB/  
 PULPROG zgpg30  
 TD 65536  
 SOLVENT Acetone  
 NS 244  
 DS 0  
 SWH 24038.461 Hz  
 FIDRES 0.366798 Hz  
 AQ 1.3631488 sec  
 RG 196.92  
 DW 20.800 usec  
 DE 6.50 usec  
 TE 300.2 K  
 D1 2.00000000 sec  
 D11 0.03000000 sec  
 TD0 1

==== CHANNEL f1 =====  
 SFO1 100.6228298 MHz  
 NUC1 13C  
 P1 9.70 usec  
 PLW1 46.98899841 W

==== CHANNEL f2 =====  
 SFO2 400.1316005 MHz  
 NUC2 1H  
 CPDPRG[2] waltz16  
 PCPD2 90.00 usec  
 PLW2 11.99499989 W  
 PLW12 0.34213999 W  
 PLW13 0.27713001 W

F2 - Processing parameters  
 SI 32768  
 SF 100.6126978 MHz  
 WDW EM  
 SSB 0  
 LB 1.00 Hz  
 GB 0  
 PC 1.40

Supplementary Figure 158. <sup>13</sup>C NMR spectrum for 5z

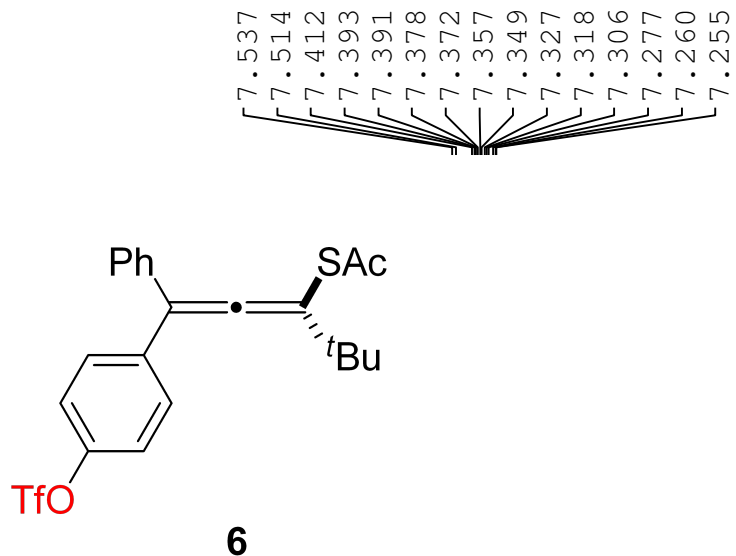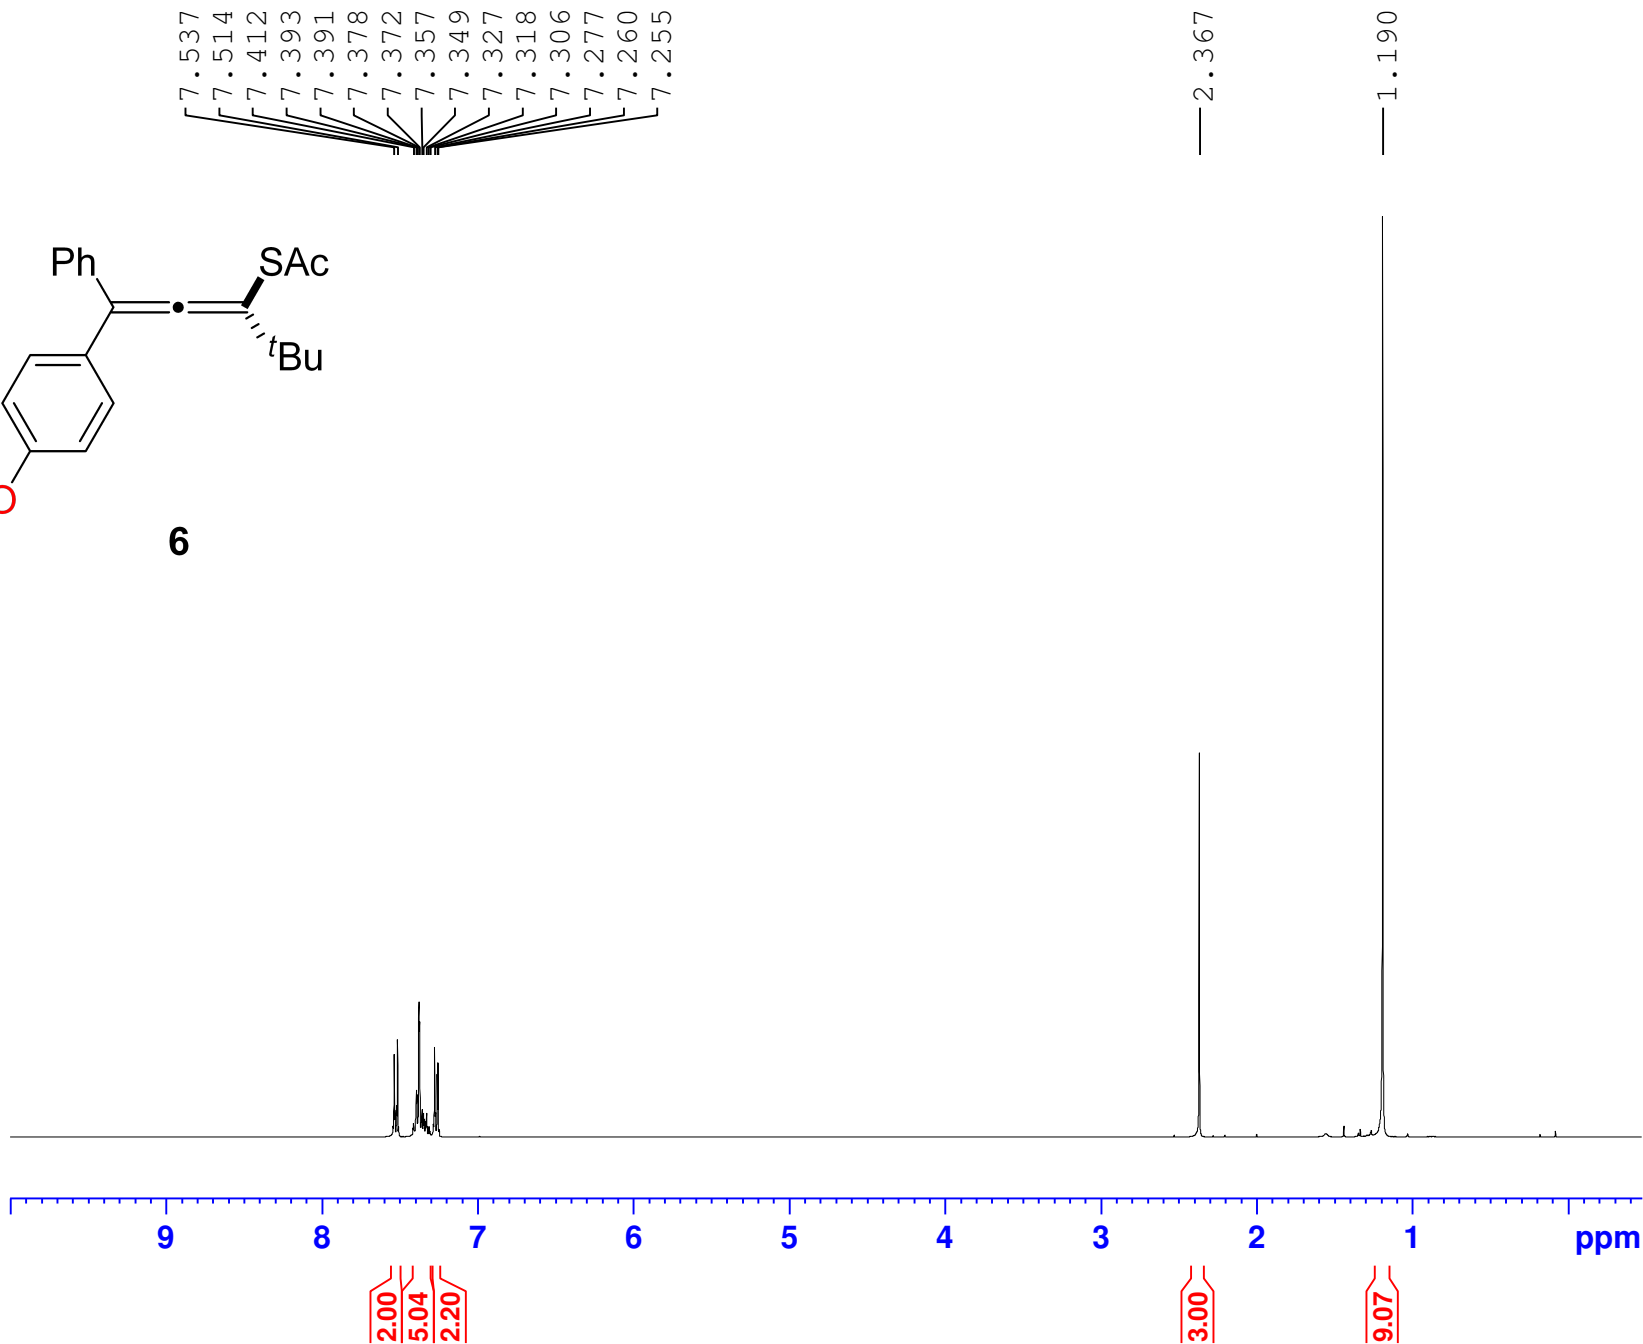

Current Data Parameters  
NAME qdy-20181-2 H  
EXPNO 1  
PROCNO 1

F2 - Acquisition Parameters  
Date\_ 20160625  
Time 14.08  
INSTRUM spect  
PROBHD 5 mm PABBO BB/  
PULPROG zg30  
TD 65536  
SOLVENT CDC13  
NS 4  
DS 0  
SWH 8012.820 Hz  
FIDRES 0.122266 Hz  
AQ 4.0894465 sec  
RG 70.97  
DW 62.400 usec  
DE 6.50 usec  
TE 298.8 K  
D1 1.00000000 sec  
TD0 1

==== CHANNEL f1 =====  
SFO1 400.1324710 MHz  
NUC1 1H  
P1 14.50 usec  
PLW1 11.99499989 W

F2 - Processing parameters  
SI 65536  
SF 400.1300094 MHz  
WDW EM  
SSB 0  
LB 0.30 Hz  
GB 0  
PC 1.00

Supplementary Figure 159. <sup>1</sup>H NMR spectrum for 6

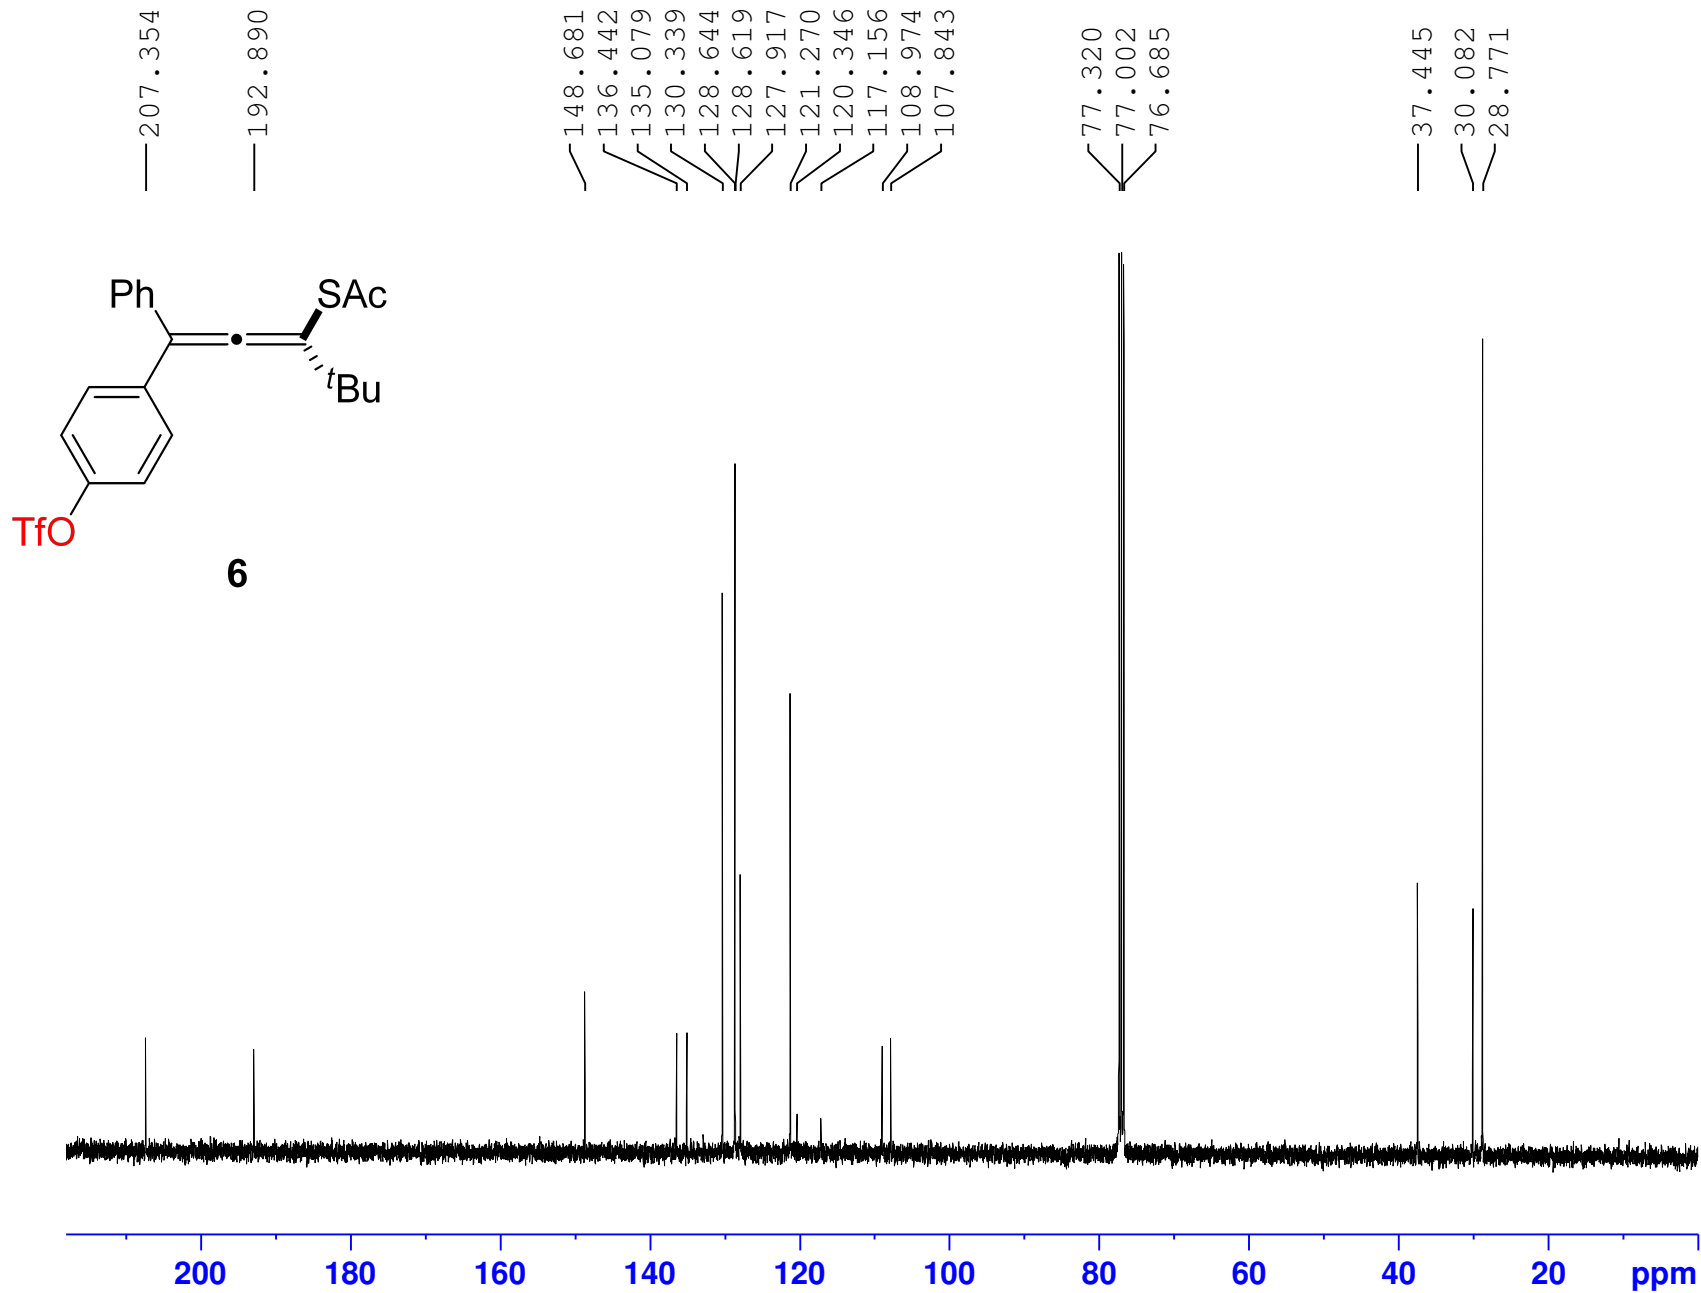

Current Data Parameters  
 NAME qdy-20181-2 C  
 EXPNO 2  
 PROCNO 1

F2 - Acquisition Parameters  
 Date\_ 20160625  
 Time 16.26  
 INSTRUM spect  
 PROBHD 5 mm PABBO BB/  
 PULPROG zgpg30  
 TD 65536  
 SOLVENT CDC13  
 NS 170  
 DS 0  
 SWH 24038.461 Hz  
 FIDRES 0.366798 Hz  
 AQ 1.3631488 sec  
 RG 196.92  
 DW 20.800 usec  
 DE 6.50 usec  
 TE 299.9 K  
 D1 2.00000000 sec  
 D11 0.03000000 sec  
 TD0 1

==== CHANNEL f1 =====  
 SFO1 100.6228298 MHz  
 NUC1 13C  
 P1 9.70 usec  
 PLW1 46.98899841 W

==== CHANNEL f2 =====  
 SFO2 400.1316005 MHz  
 NUC2 1H  
 CPDPRG[2] waltz16  
 PCPD2 90.00 usec  
 PLW2 11.99499989 W  
 PLW12 0.34213999 W  
 PLW13 0.27713001 W

F2 - Processing parameters  
 SI 32768  
 SF 100.6127707 MHz  
 WDW EM  
 SSB 0  
 LB 1.00 Hz  
 GB 0  
 PC 1.40

**Supplementary Figure 160. <sup>13</sup>C NMR spectrum for 6**

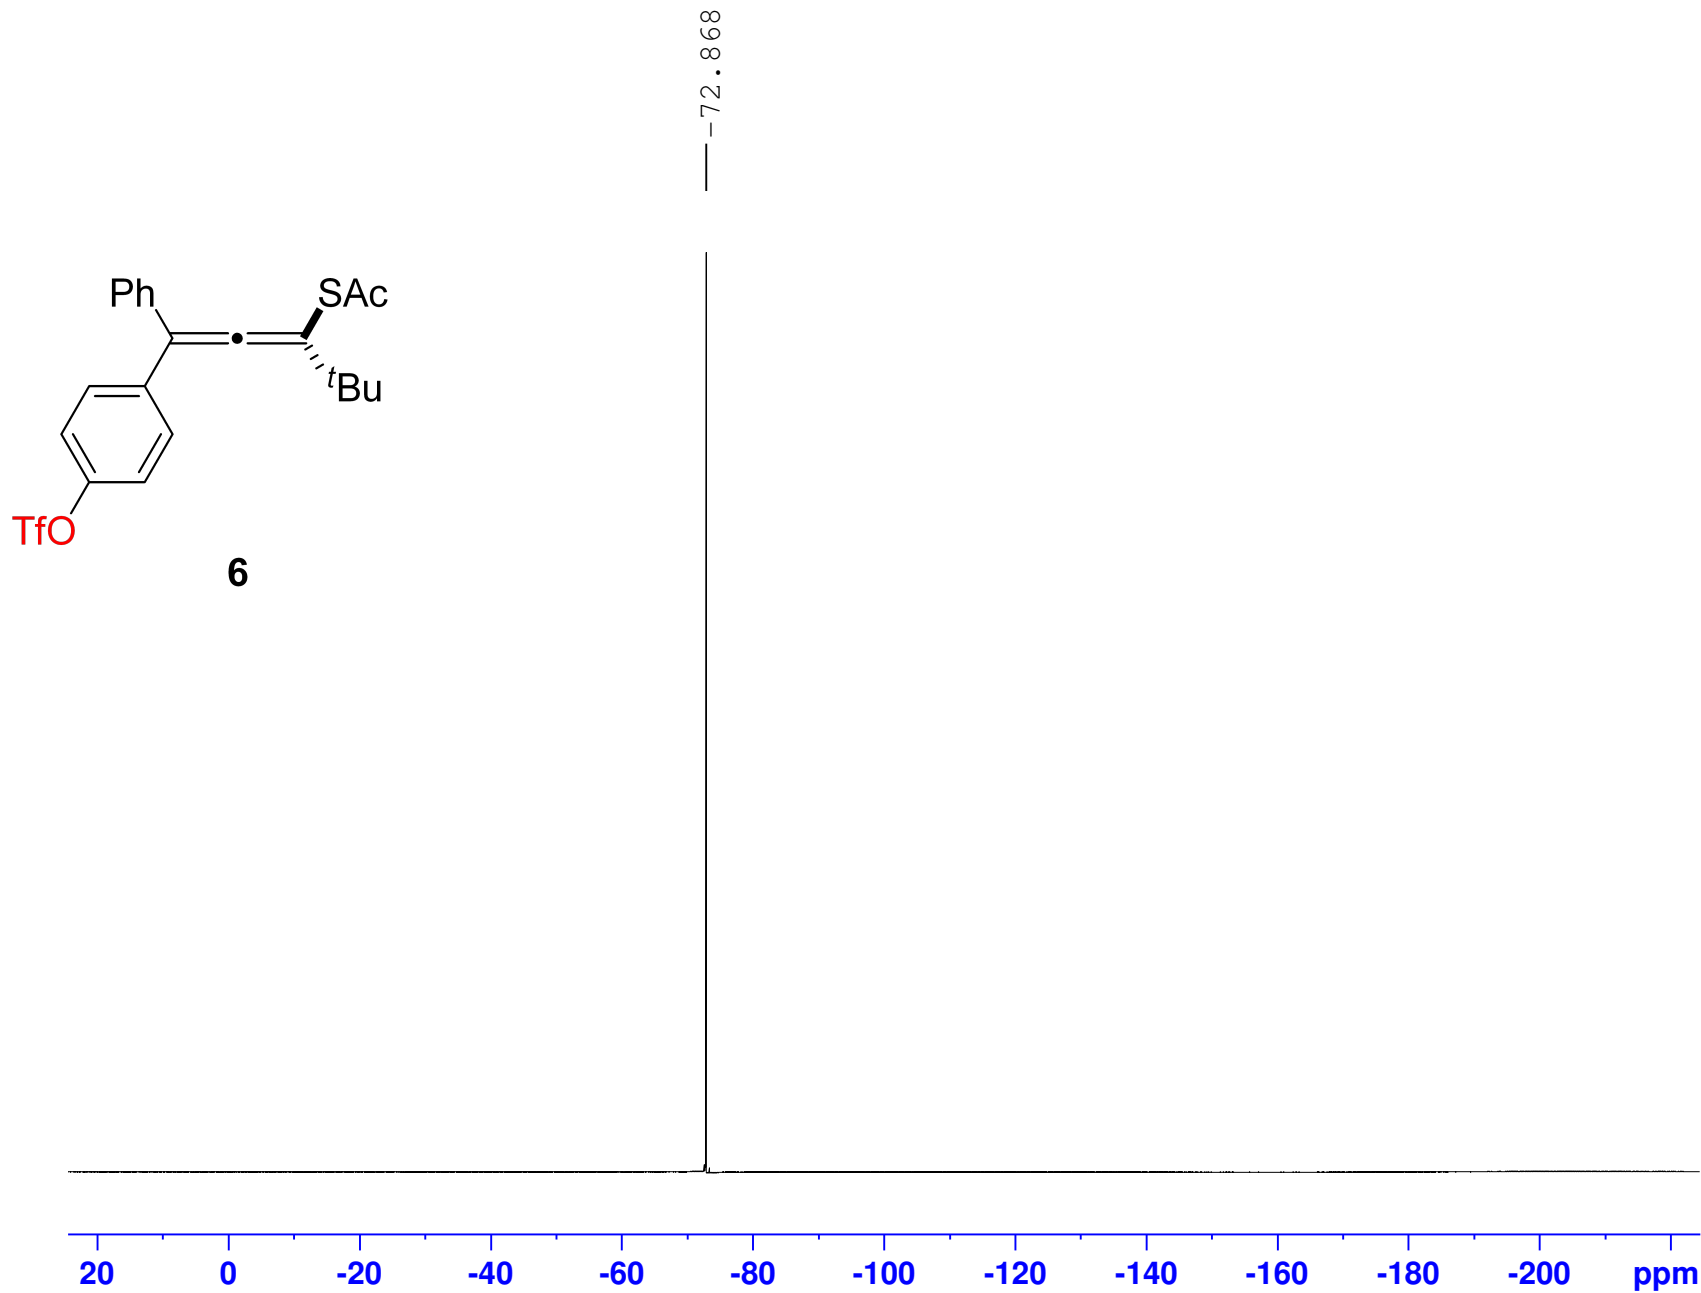

Current Data Parameters  
 NAME qdy-20181-2 F  
 EXPNO 1  
 PROCNO 1

F2 - Acquisition Parameters  
 Date\_ 20160625  
 Time 16.32  
 INSTRUM spect  
 PROBHD 5 mm PABBO BB/  
 PULPROG zgpg30  
 TD 65536  
 SOLVENT CDCl3  
 NS 4  
 DS 0  
 SWH 93750.000 Hz  
 FIDRES 1.430511 Hz  
 AQ 0.3495253 sec  
 RG 196.92  
 DW 5.333 usec  
 DE 6.50 usec  
 TE 299.5 K  
 D1 2.00000000 sec  
 D11 0.03000000 sec  
 TD0 1

==== CHANNEL f1 =====  
 SFO1 376.4607162 MHz  
 NUC1 19F  
 P1 14.70 usec  
 PLW1 15.99600029 W

==== CHANNEL f2 =====  
 SFO2 400.1316005 MHz  
 NUC2 1H  
 CPDPRG[2] waltz16  
 PCPD2 90.00 usec  
 PLW2 11.99499989 W  
 PLW12 0.34213999 W  
 PLW13 0.27713001 W

F2 - Processing parameters  
 SI 32768  
 SF 376.4983660 MHz  
 WDW EM  
 SSB 0  
 LB 1.00 Hz  
 GB 0  
 PC 1.40

Supplementary Figure 161. <sup>19</sup>F NMR spectrum for 6

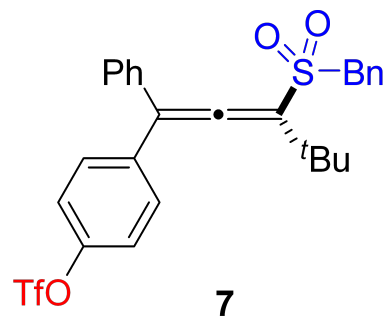

7.491  
7.469  
7.454  
7.449  
7.441  
7.436  
7.373  
7.365  
7.361  
7.353  
7.339  
7.317  
7.265  
7.247  
7.229  
7.191  
7.174  
7.127  
7.109  
7.106  
5.323  
5.320  
5.317  
— 4.262

— 1.327

Current Data Parameters  
NAME qdy-20181-3 H  
EXPNO 1  
PROCNO 1

F2 - Acquisition Parameters  
Date\_ 20160623  
Time 21.32  
INSTRUM spect  
PROBHD 5 mm PABBO BB/  
PULPROG zg30  
TD 65536  
SOLVENT CD2C12  
NS 4  
DS 0  
SWH 8012.820 Hz  
FIDRES 0.122266 Hz  
AQ 4.0894465 sec  
RG 34.77  
DW 62.400 usec  
DE 6.50 usec  
TE 298.7 K  
D1 1.00000000 sec  
TD0 1

==== CHANNEL f1 =====  
SFO1 400.1324710 MHz  
NUC1 1H  
P1 14.50 usec  
PLW1 11.99499989 W

F2 - Processing parameters  
SI 65536  
SF 400.1300152 MHz  
WDW EM  
SSB 0  
LB 0.30 Hz  
GB 0  
PC 1.00

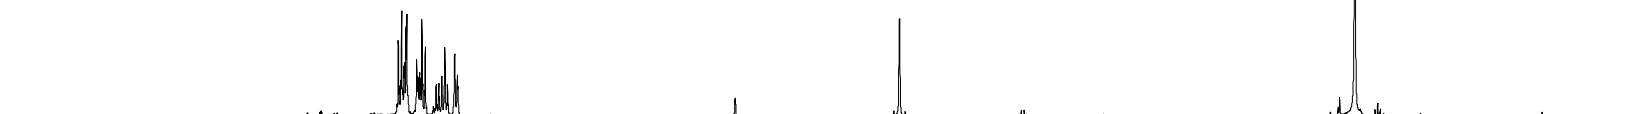

9

8

6

5

4

3

2

1

ppm

5.17  
3.97  
3.02  
1.95

2.00

9.26

**Supplementary Figure 162. <sup>1</sup>H NMR spectrum for 7**

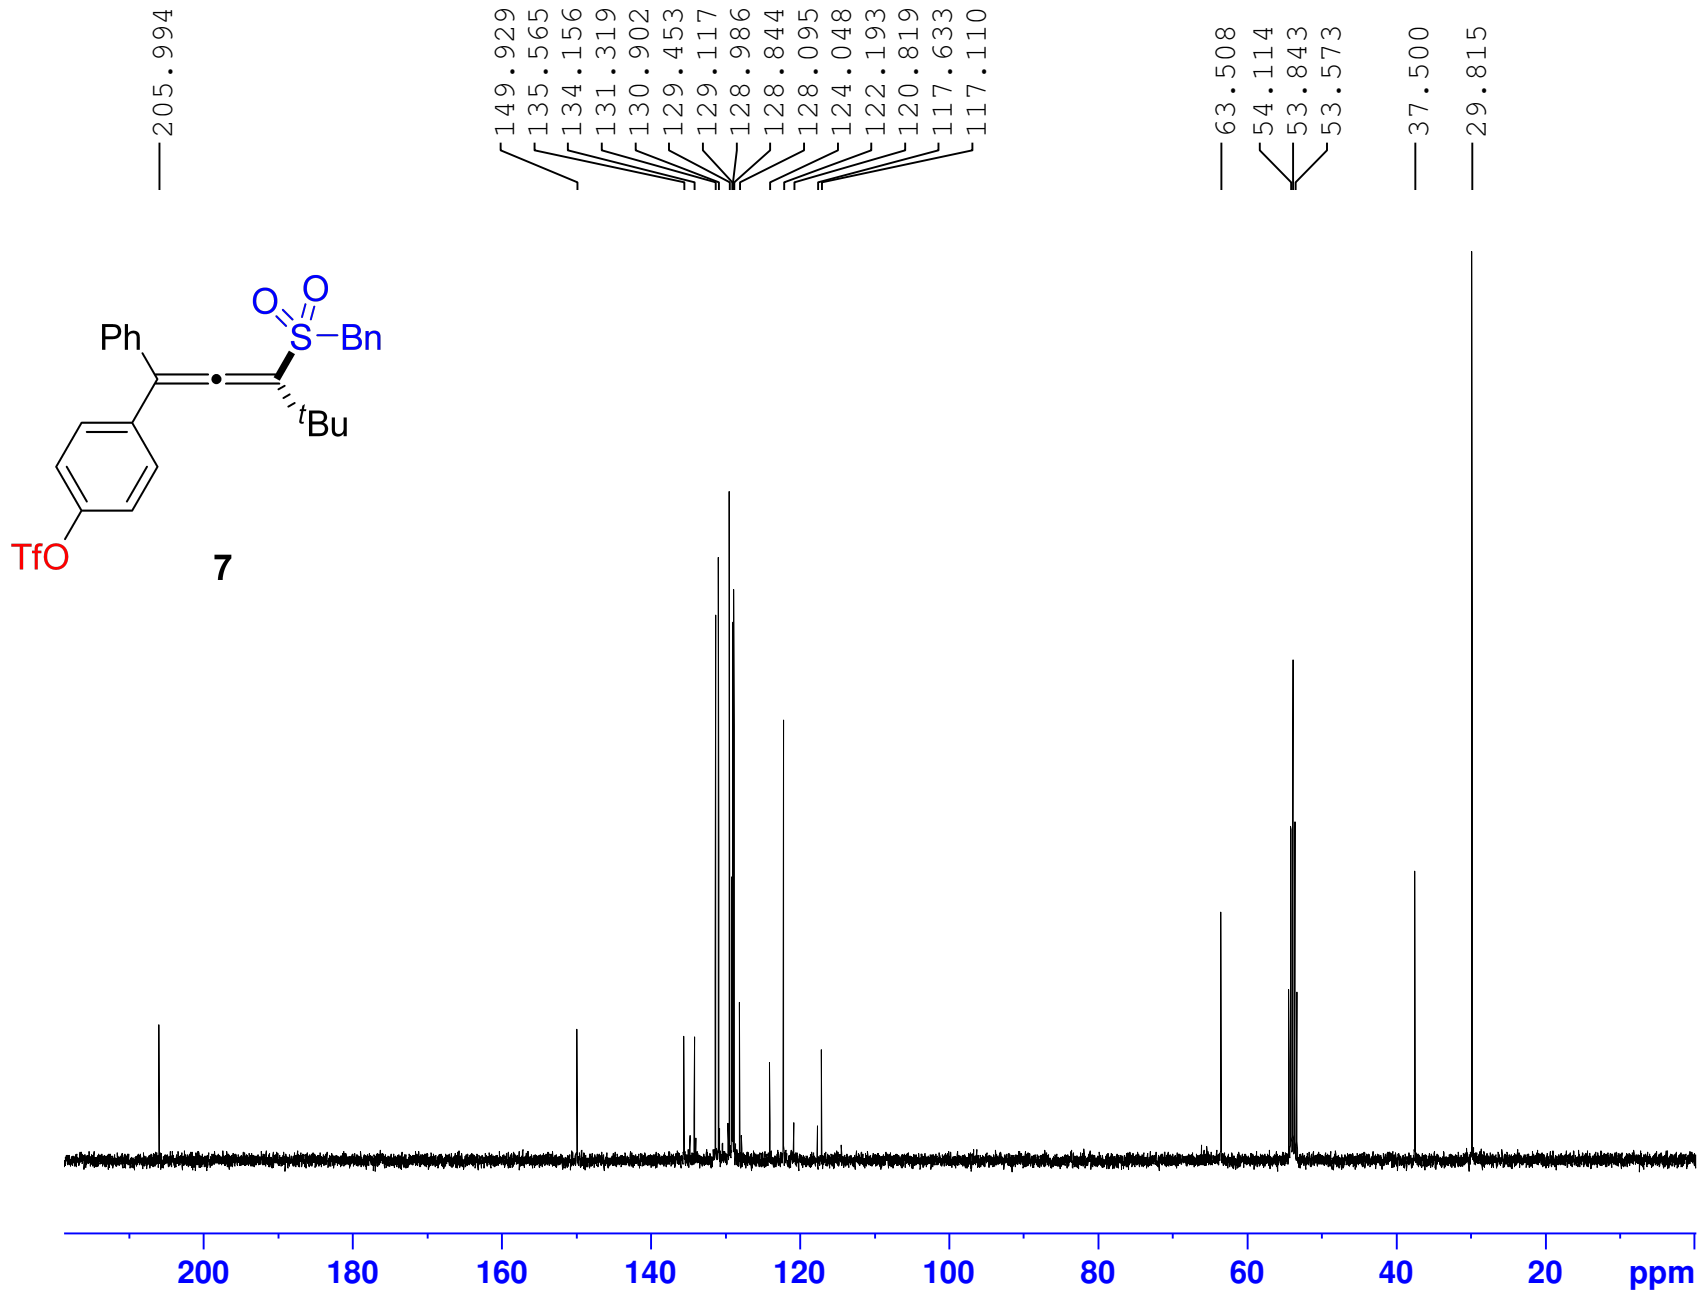

Current Data Parameters  
 NAME qdy-20181-3 C  
 EXPNO 1  
 PROCNO 1

F2 - Acquisition Parameters  
 Date\_ 20160623  
 Time 21.35  
 INSTRUM spect  
 PROBHD 5 mm PABBO BB/  
 PULPROG zgpg30  
 TD 65536  
 SOLVENT CD2C12  
 NS 82  
 DS 0  
 SWH 24038.461 Hz  
 FIDRES 0.366798 Hz  
 AQ 1.3631488 sec  
 RG 196.92  
 DW 20.800 usec  
 DE 6.50 usec  
 TE 299.6 K  
 D1 2.00000000 sec  
 D11 0.03000000 sec  
 TD0 1

==== CHANNEL f1 =====  
 SFO1 100.6228298 MHz  
 NUC1 13C  
 P1 9.70 usec  
 PLW1 46.98899841 W

==== CHANNEL f2 =====  
 SFO2 400.1316005 MHz  
 NUC2 1H  
 CPDPRG[2] waltz16  
 PCPD2 90.00 usec  
 PLW2 11.99499989 W  
 PLW12 0.34213999 W  
 PLW13 0.27713001 W

F2 - Processing parameters  
 SI 32768  
 SF 100.6127255 MHz  
 WDW EM  
 SSB 0  
 LB 1.00 Hz  
 GB 0  
 PC 1.40

**Supplementary Figure 163. <sup>13</sup>C NMR spectrum for 7**



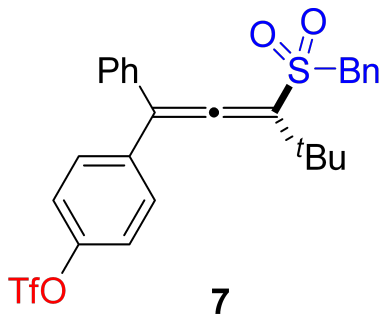

— -73.149

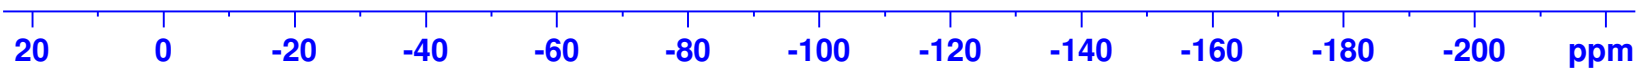

Current Data Parameters  
 NAME qdy-20181-3 F  
 EXPNO 1  
 PROCNO 1

F2 - Acquisition Parameters  
 Date\_ 20160623  
 Time 21.39  
 INSTRUM spect  
 PROBHD 5 mm PABBO BB/  
 PULPROG zgpg30  
 TD 65536  
 SOLVENT CD2Cl2  
 NS 4  
 DS 0  
 SWH 93750.000 Hz  
 FIDRES 1.430511 Hz  
 AQ 0.3495253 sec  
 RG 196.92  
 DW 5.333 usec  
 DE 6.50 usec  
 TE 299.1 K  
 D1 2.00000000 sec  
 D11 0.03000000 sec  
 TD0 1

==== CHANNEL f1 =====  
 SFO1 376.4607162 MHz  
 NUC1 19F  
 P1 14.70 usec  
 PLW1 15.99600029 W

==== CHANNEL f2 =====  
 SFO2 400.1316005 MHz  
 NUC2 1H  
 CPDPRG[2] waltz16  
 PCPD2 90.00 usec  
 PLW2 11.99499989 W  
 PLW12 0.34213999 W  
 PLW13 0.27713001 W

F2 - Processing parameters  
 SI 32768  
 SF 376.4983660 MHz  
 WDW EM  
 SSB 0  
 LB 1.00 Hz  
 GB 0  
 PC 1.40

**Supplementary Figure 164. <sup>19</sup>F NMR spectrum for 7**

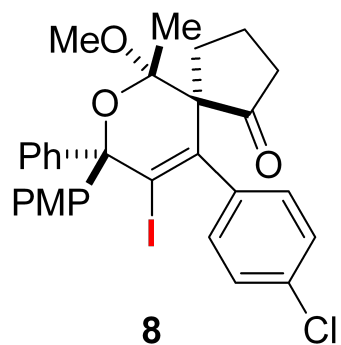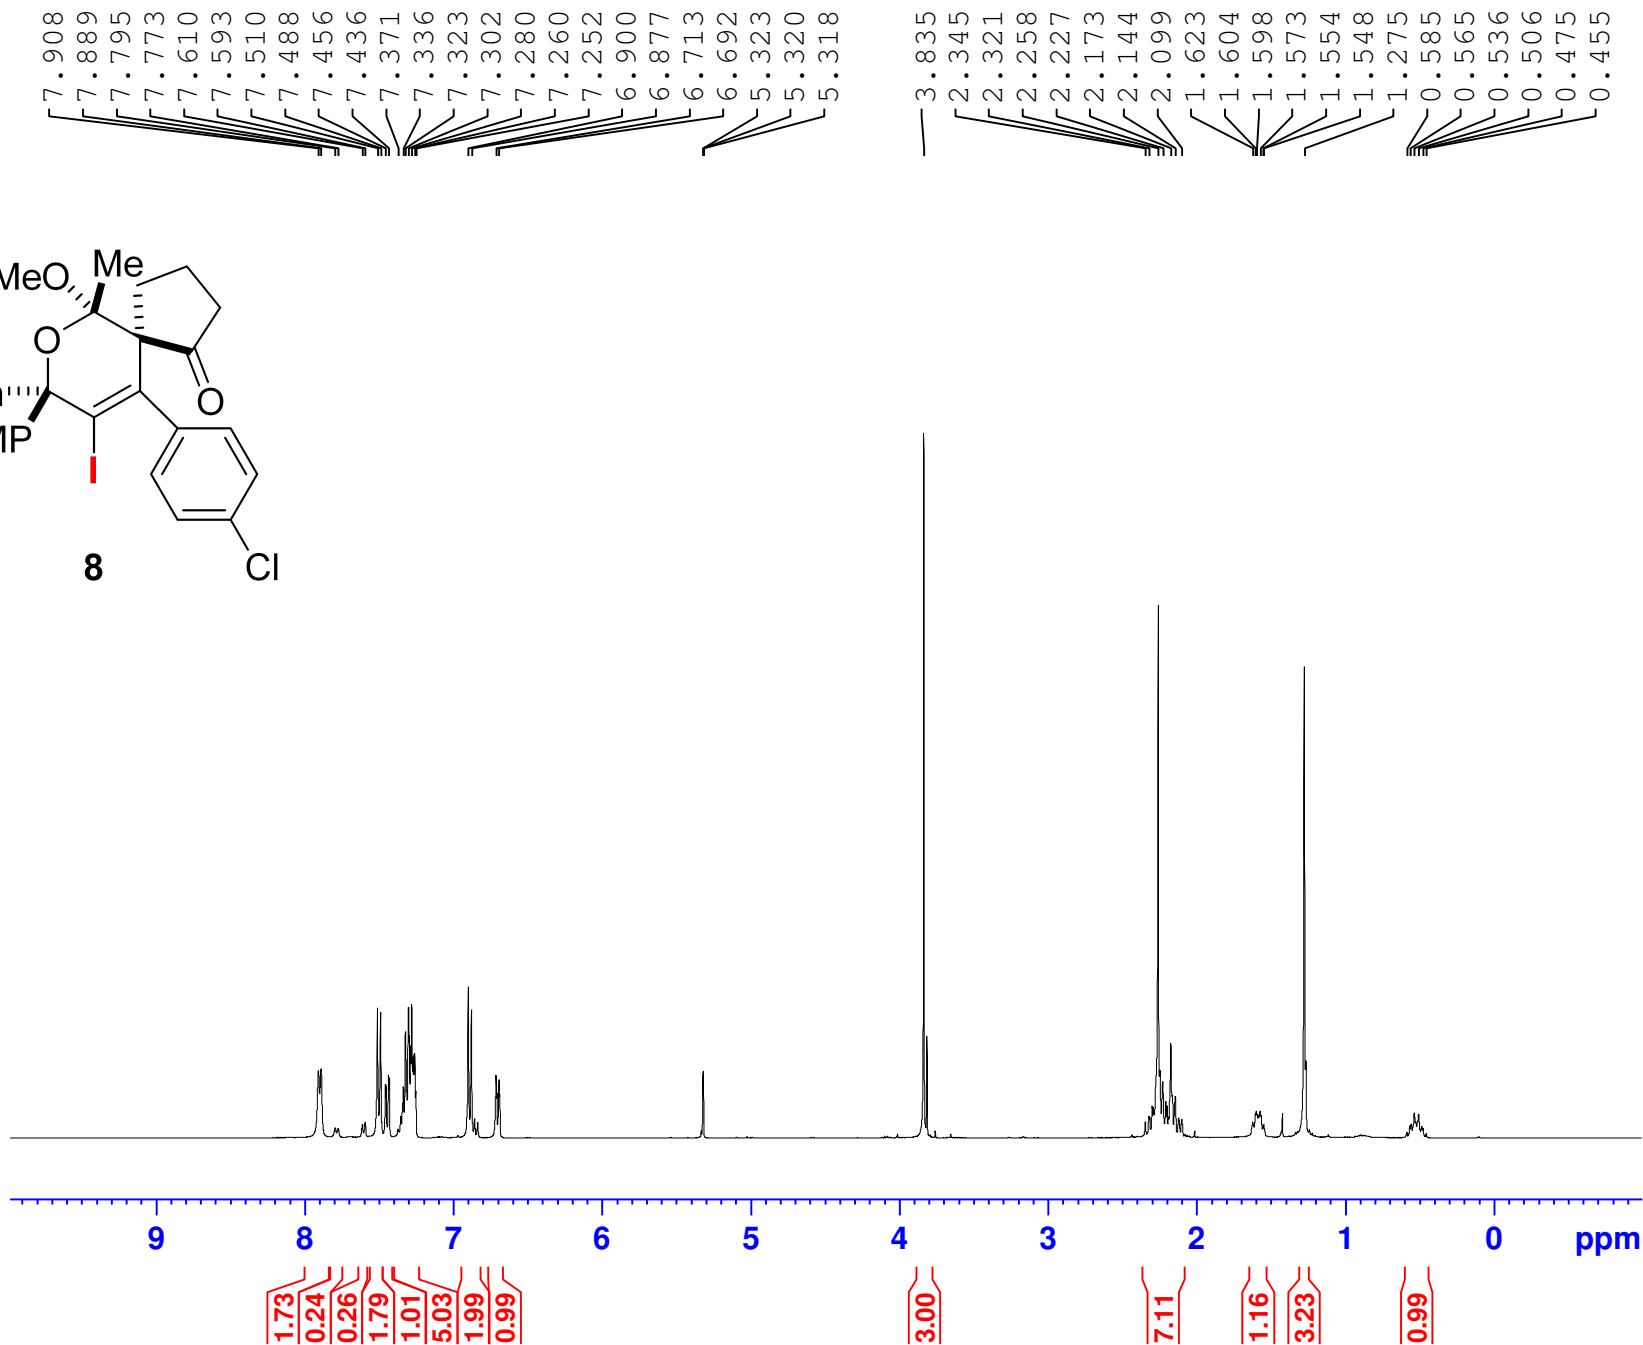

Current Data Parameters  
 NAME qdy-40038-2 H  
 EXPNO 2  
 PROCNO 1

F2 - Acquisition Parameters  
 Date\_ 20170114  
 Time 20.10  
 INSTRUM spect  
 PROBHD 5 mm PABBO BB/  
 PULPROG zg30  
 TD 65536  
 SOLVENT CD2C12  
 NS 4  
 DS 0  
 SWH 8012.820 Hz  
 FIDRES 0.122266 Hz  
 AQ 4.0894465 sec  
 RG 49.32  
 DW 62.400 usec  
 DE 6.50 usec  
 TE 296.3 K  
 D1 1.00000000 sec  
 TD0 1

==== CHANNEL f1 =====  
 SFO1 400.1324710 MHz  
 NUC1 1H  
 P1 14.50 usec  
 PLW1 11.99499989 W

F2 - Processing parameters  
 SI 65536  
 SF 400.1300157 MHz  
 WDW EM  
 SSB 0  
 LB 0.30 Hz  
 GB 0  
 PC 1.00

**Supplementary Figure 165. <sup>1</sup>H NMR spectrum for 8**

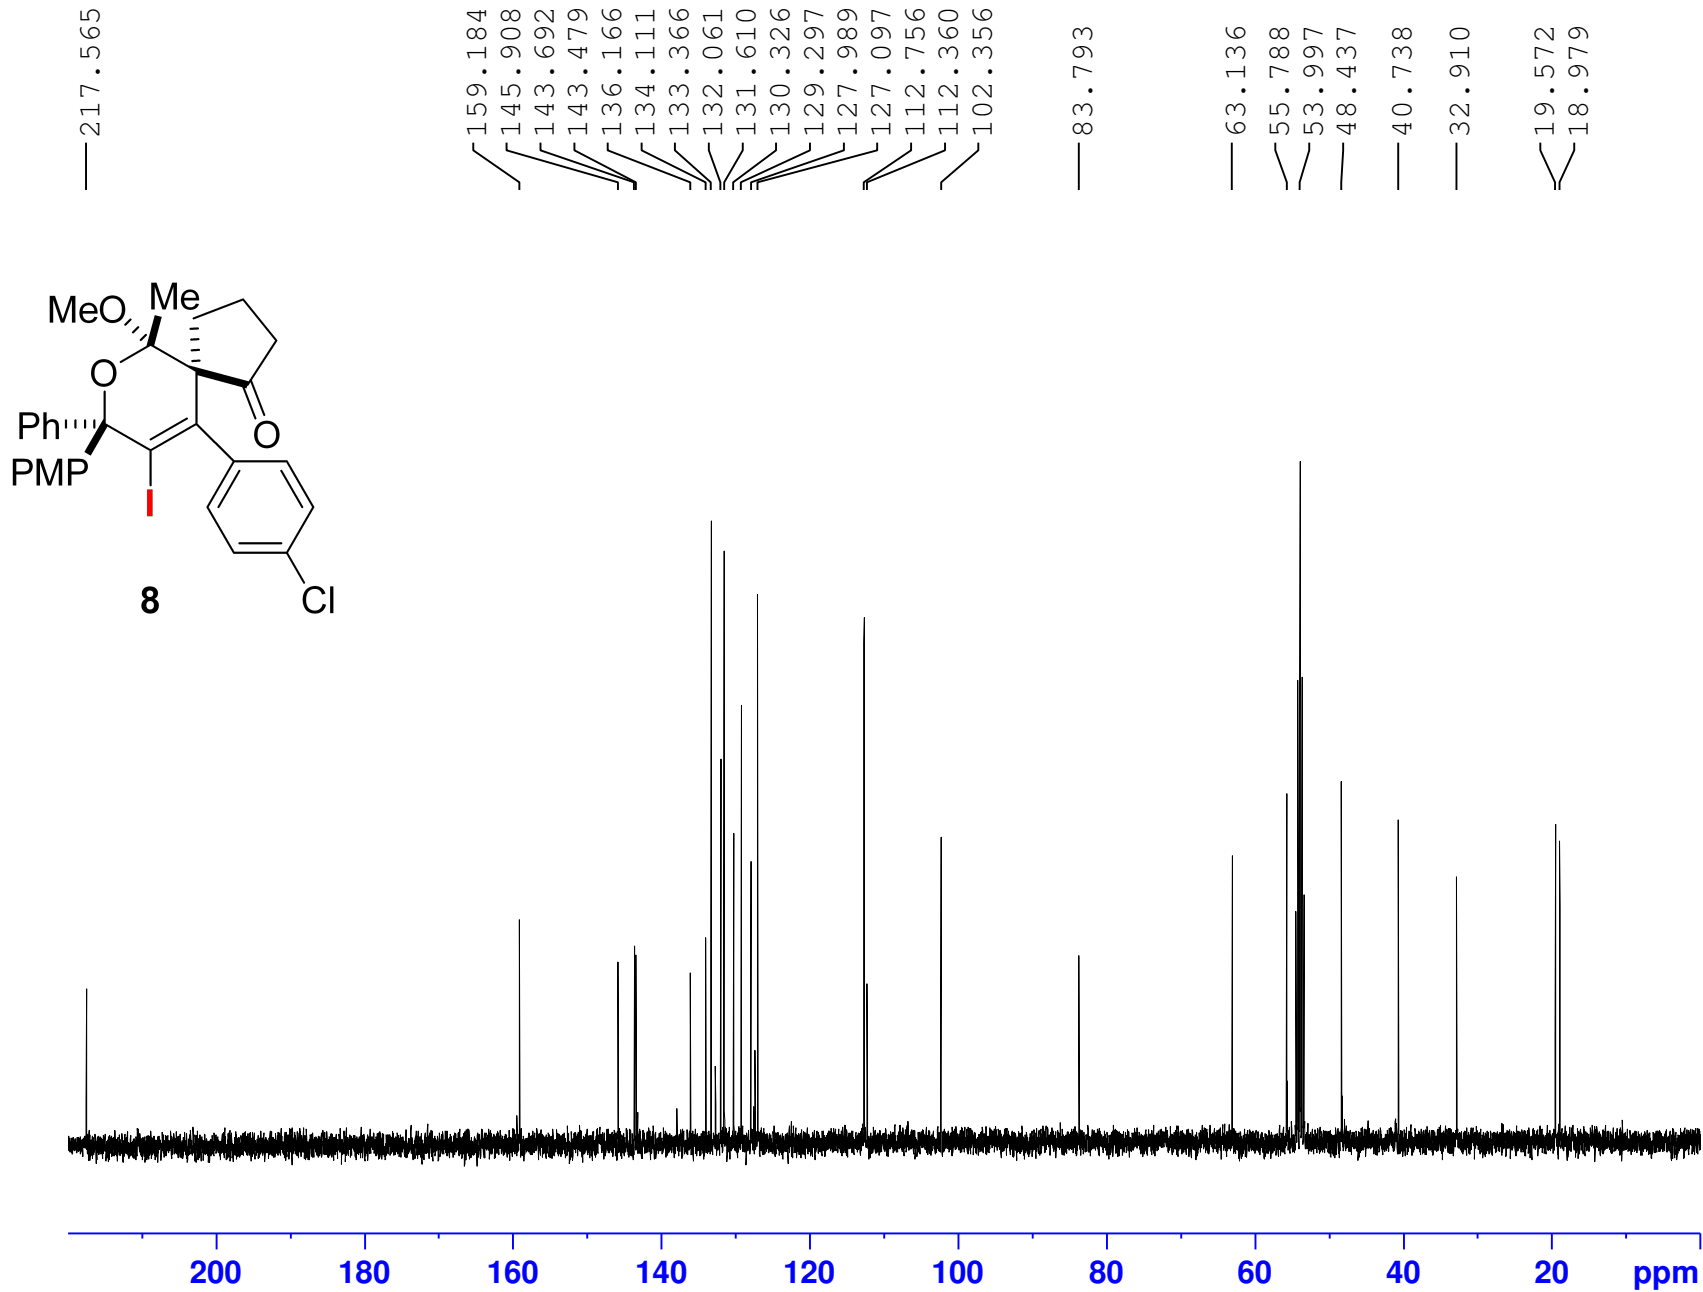

Current Data Parameters  
 NAME qdy-40038-1 C  
 EXPNO 1  
 PROCNO 1

F2 - Acquisition Parameters  
 Date\_ 20170115  
 Time 17.36  
 INSTRUM spect  
 PROBHD 5 mm PABBO BB/  
 PULPROG zgpg30  
 TD 65536  
 SOLVENT CD2C12  
 NS 74  
 DS 0  
 SWH 24038.461 Hz  
 FIDRES 0.366798 Hz  
 AQ 1.3631488 sec  
 RG 196.92  
 DW 20.800 usec  
 DE 6.50 usec  
 TE 296.9 K  
 D1 2.00000000 sec  
 D11 0.03000000 sec  
 TD0 1

==== CHANNEL f1 =====  
 SFO1 100.6228298 MHz  
 NUC1 13C  
 P1 9.70 usec  
 PLW1 46.98899841 W

==== CHANNEL f2 =====  
 SFO2 400.1316005 MHz  
 NUC2 1H  
 CPDPRG[2] waltz16  
 PCPD2 90.00 usec  
 PLW2 11.99499989 W  
 PLW12 0.34213999 W  
 PLW13 0.27713001 W

F2 - Processing parameters  
 SI 32768  
 SF 100.6127153 MHz  
 WDW EM  
 SSB 0  
 LB 1.00 Hz  
 GB 0  
 PC 1.40

Supplementary Figure 166. <sup>13</sup>C NMR spectrum for **8**

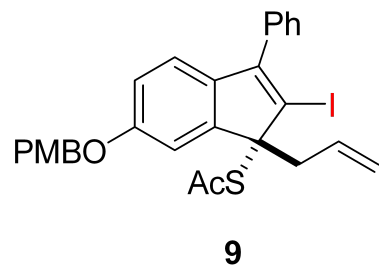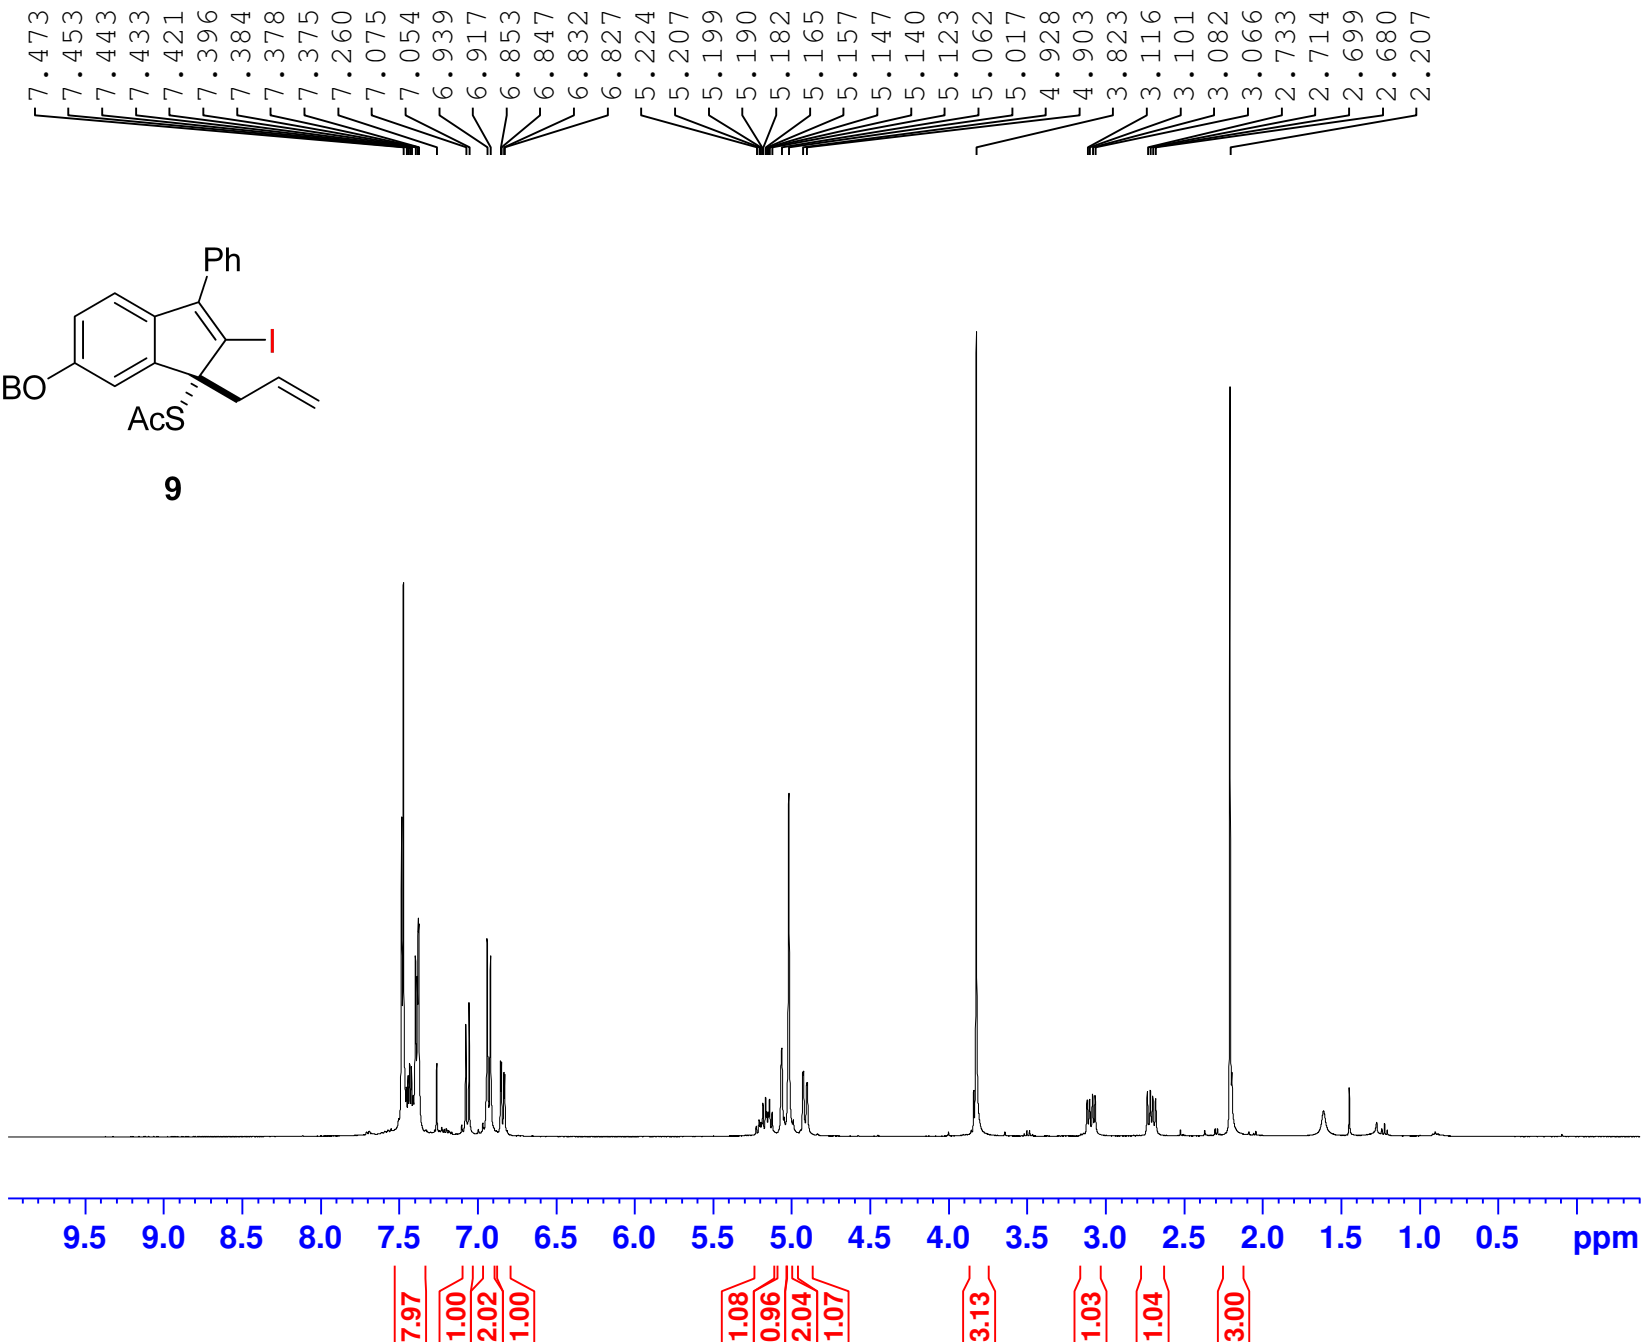

Current Data Parameters  
 NAME qdy-20152-2 H  
 EXPNO 1  
 PROCNO 1

F2 - Acquisition Parameters  
 Date\_ 20160519  
 Time 19.08  
 INSTRUM spect  
 PROBHD 5 mm PABBO BB/  
 PULPROG zg30  
 TD 65536  
 SOLVENT CDCl3  
 NS 4  
 DS 0  
 SWH 8012.820 Hz  
 FIDRES 0.122266 Hz  
 AQ 4.0894465 sec  
 RG 70.97  
 DW 62.400 usec  
 DE 6.50 usec  
 TE 297.9 K  
 D1 1.00000000 sec  
 TD0 1

==== CHANNEL f1 =====  
 SFO1 400.1324710 MHz  
 NUC1 1H  
 P1 14.50 usec  
 PLW1 11.99499989 W

F2 - Processing parameters  
 SI 65536  
 SF 400.1300092 MHz  
 WDW EM  
 SSB 0  
 LB 0.30 Hz  
 GB 0  
 PC 1.00

Supplementary Figure 167. <sup>1</sup>H NMR spectrum for 9

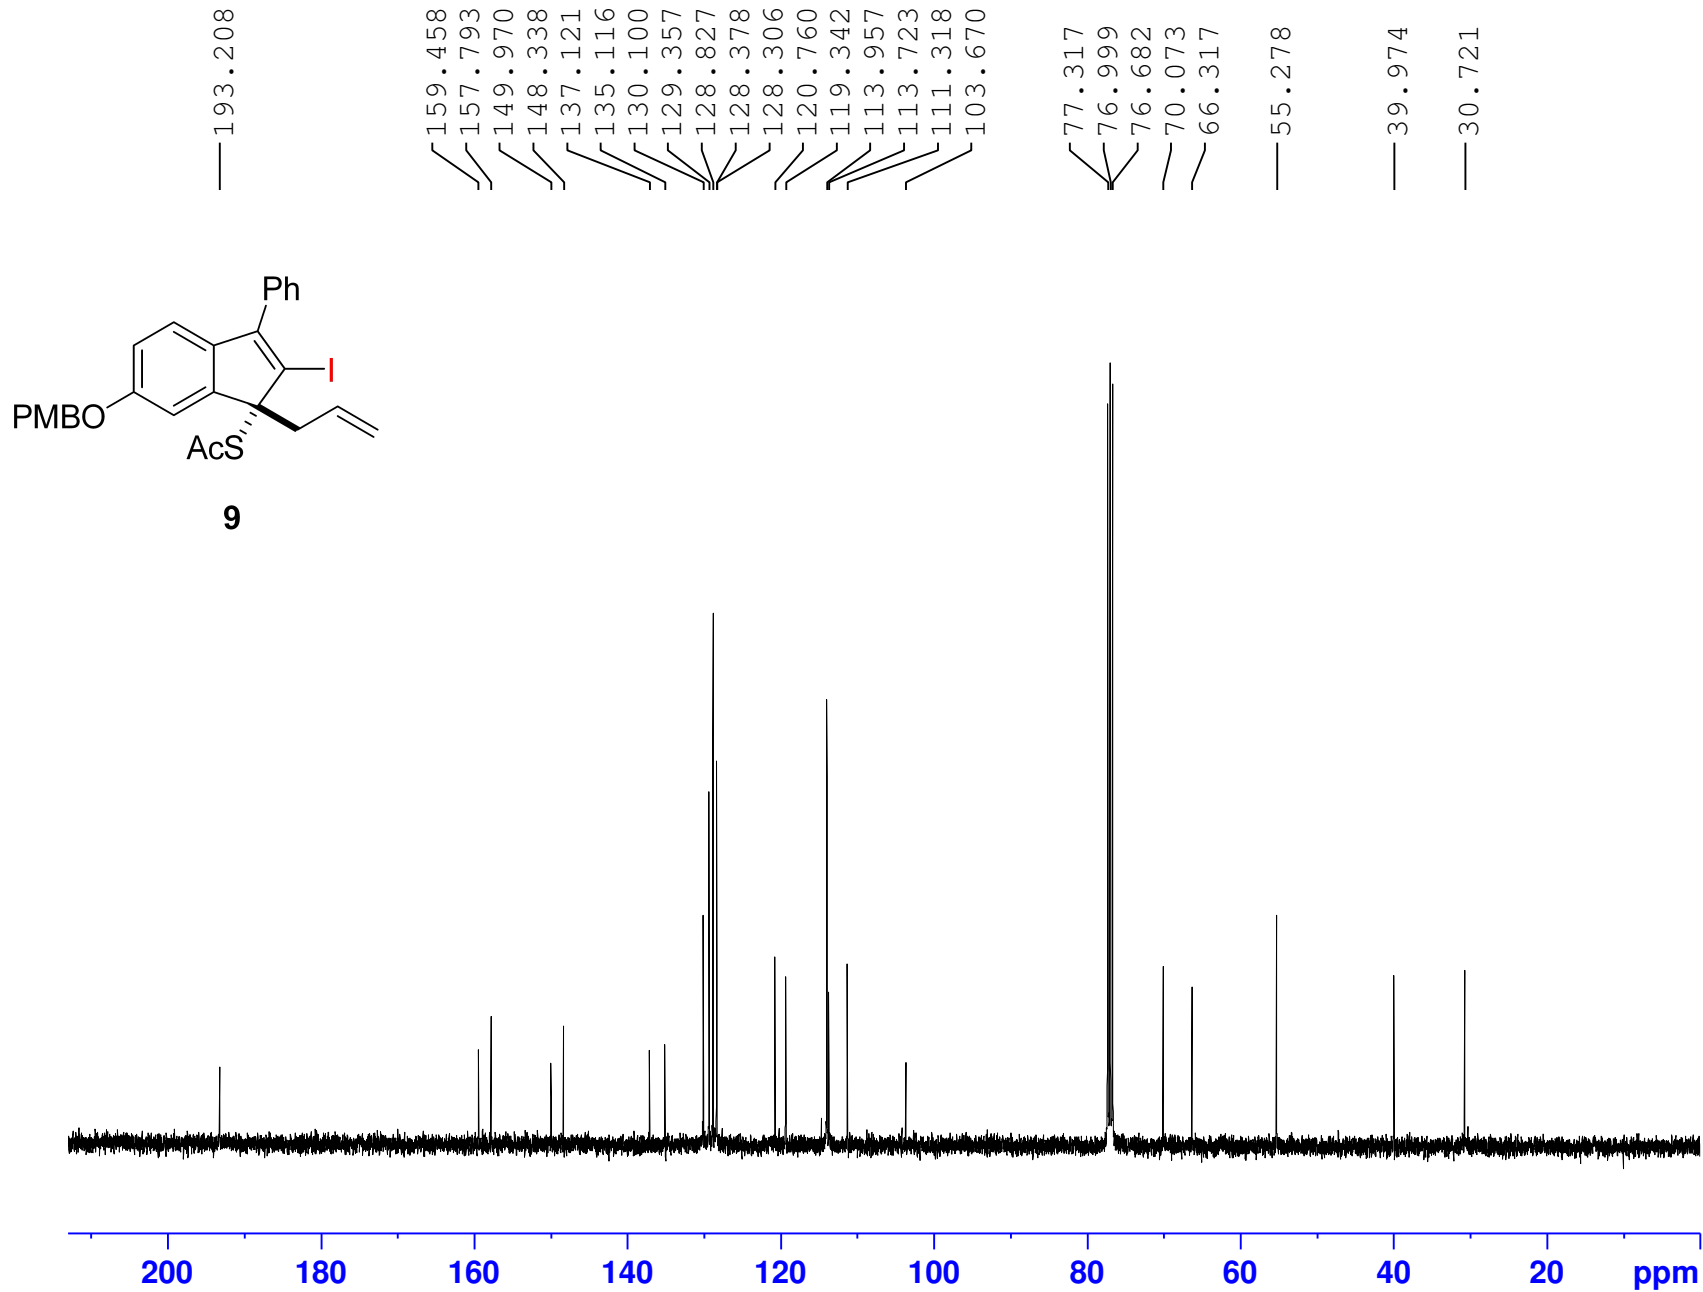

Current Data Parameters  
 NAME qdy-20152-2 C  
 EXPNO 1  
 PROCNO 1

F2 - Acquisition Parameters  
 Date\_ 20160519  
 Time 19.20  
 INSTRUM spect  
 PROBHD 5 mm PABBO BB/  
 PULPROG zgpg30  
 TD 65536  
 SOLVENT CDC13  
 NS 156  
 DS 0  
 SWH 24038.461 Hz  
 FIDRES 0.366798 Hz  
 AQ 1.3631488 sec  
 RG 196.92  
 DW 20.800 usec  
 DE 6.50 usec  
 TE 299.2 K  
 D1 2.00000000 sec  
 D11 0.03000000 sec  
 TD0 1

==== CHANNEL f1 =====  
 SFO1 100.6228298 MHz  
 NUC1 13C  
 P1 9.70 usec  
 PLW1 46.98899841 W

==== CHANNEL f2 =====  
 SFO2 400.1316005 MHz  
 NUC2 1H  
 CPDPRG[2] waltz16  
 PCPD2 90.00 usec  
 PLW2 11.99499989 W  
 PLW12 0.34213999 W  
 PLW13 0.27713001 W

F2 - Processing parameters  
 SI 32768  
 SF 100.6127744 MHz  
 WDW EM  
 SSB 0  
 LB 1.00 Hz  
 GB 0  
 PC 1.40

Supplementary Figure 168. <sup>13</sup>C NMR spectrum for 9

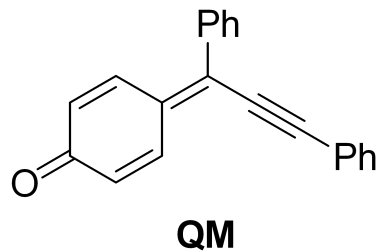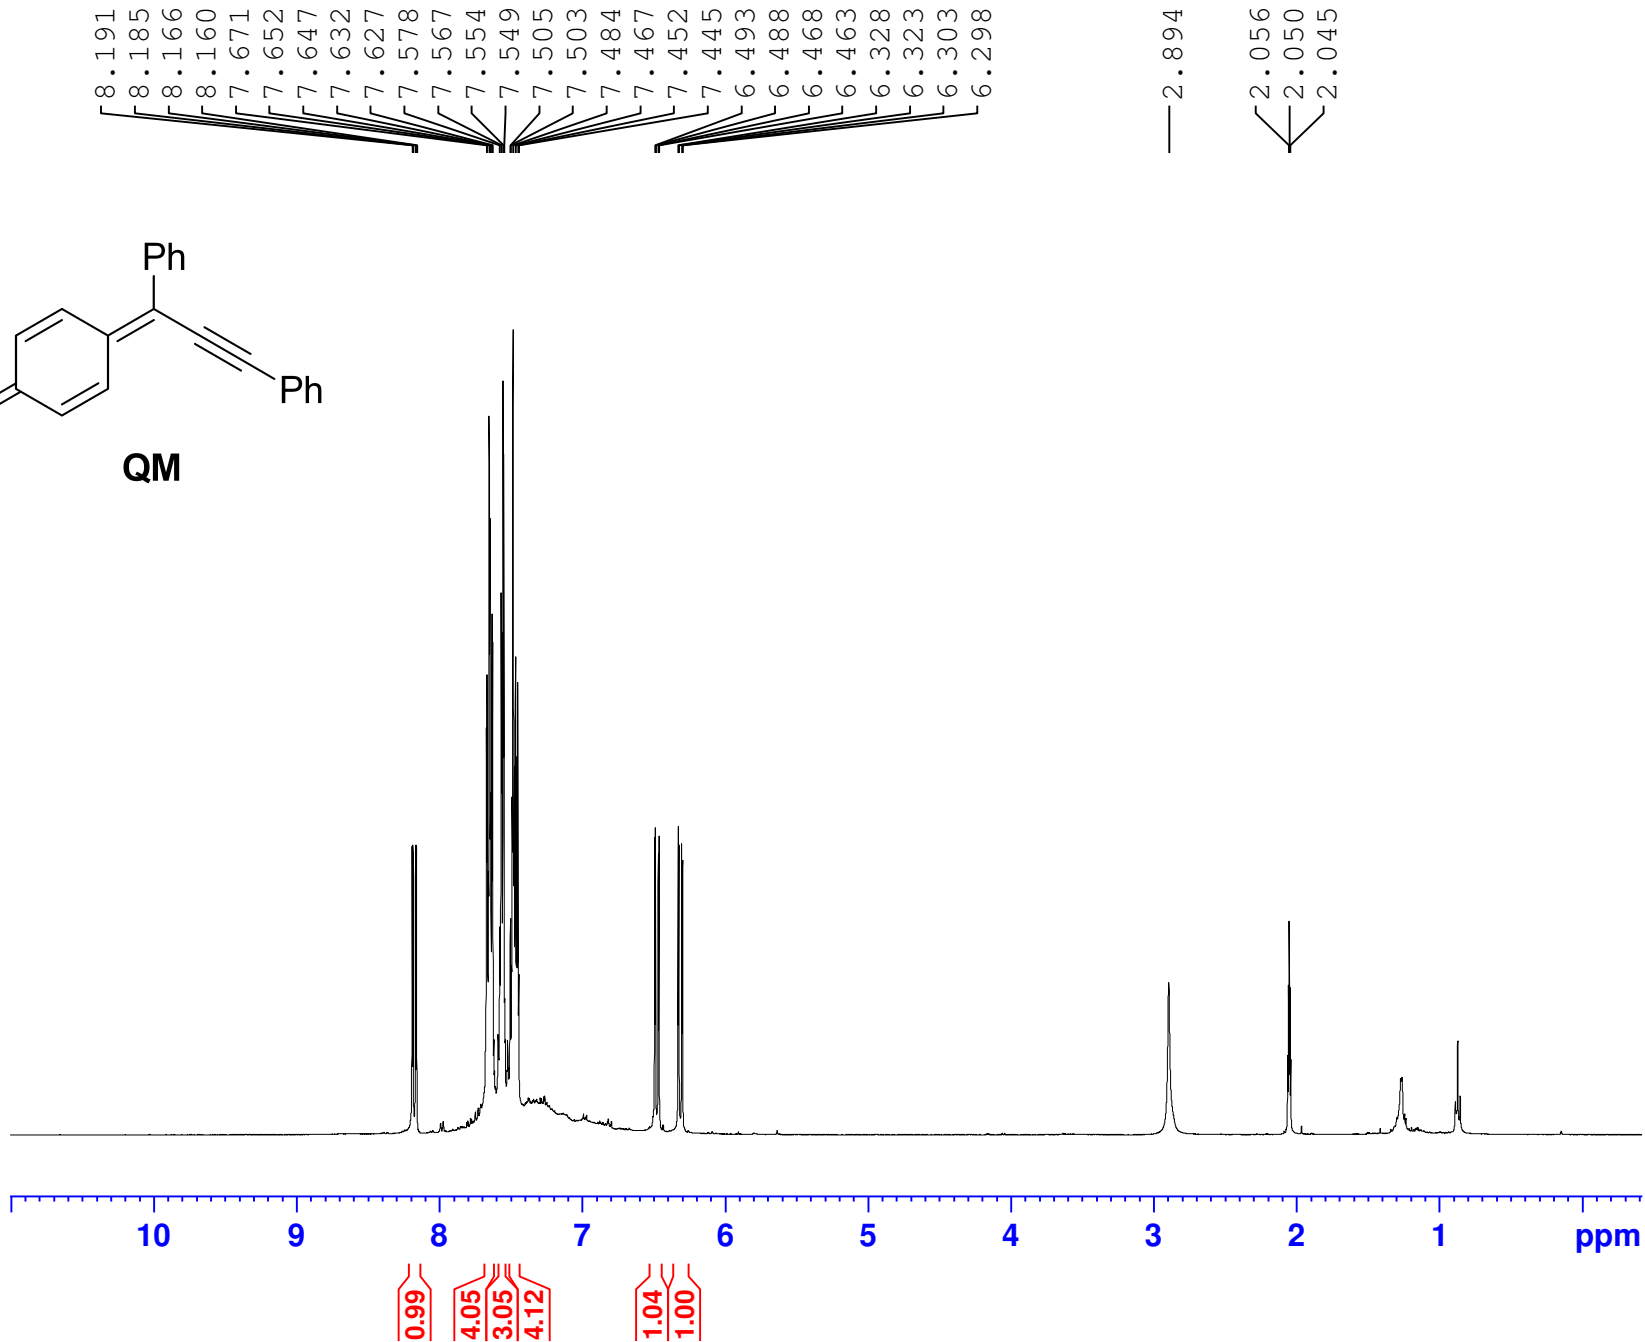

Current Data Parameters  
 NAME qdy-20167-2 H  
 EXPNO 2  
 PROCNO 1

F2 - Acquisition Parameters  
 Date\_ 20160607  
 Time 15.07  
 INSTRUM spect  
 PROBHD 5 mm PABBO BB/  
 PULPROG zg30  
 TD 65536  
 SOLVENT Acetone  
 NS 8  
 DS 0  
 SWH 8012.820 Hz  
 FIDRES 0.122266 Hz  
 AQ 4.0894465 sec  
 RG 54.81  
 DW 62.400 usec  
 DE 6.50 usec  
 TE 296.6 K  
 D1 1.00000000 sec  
 TD0 1

==== CHANNEL f1 =====  
 SFO1 400.1324710 MHz  
 NUC1 1H  
 P1 14.50 usec  
 PLW1 11.99499989 W

F2 - Processing parameters  
 SI 65536  
 SF 400.1300066 MHz  
 WDW EM  
 SSB 0  
 LB 0.30 Hz  
 GB 0  
 PC 1.00

Supplementary Figure 169. <sup>1</sup>H NMR spectrum for QM

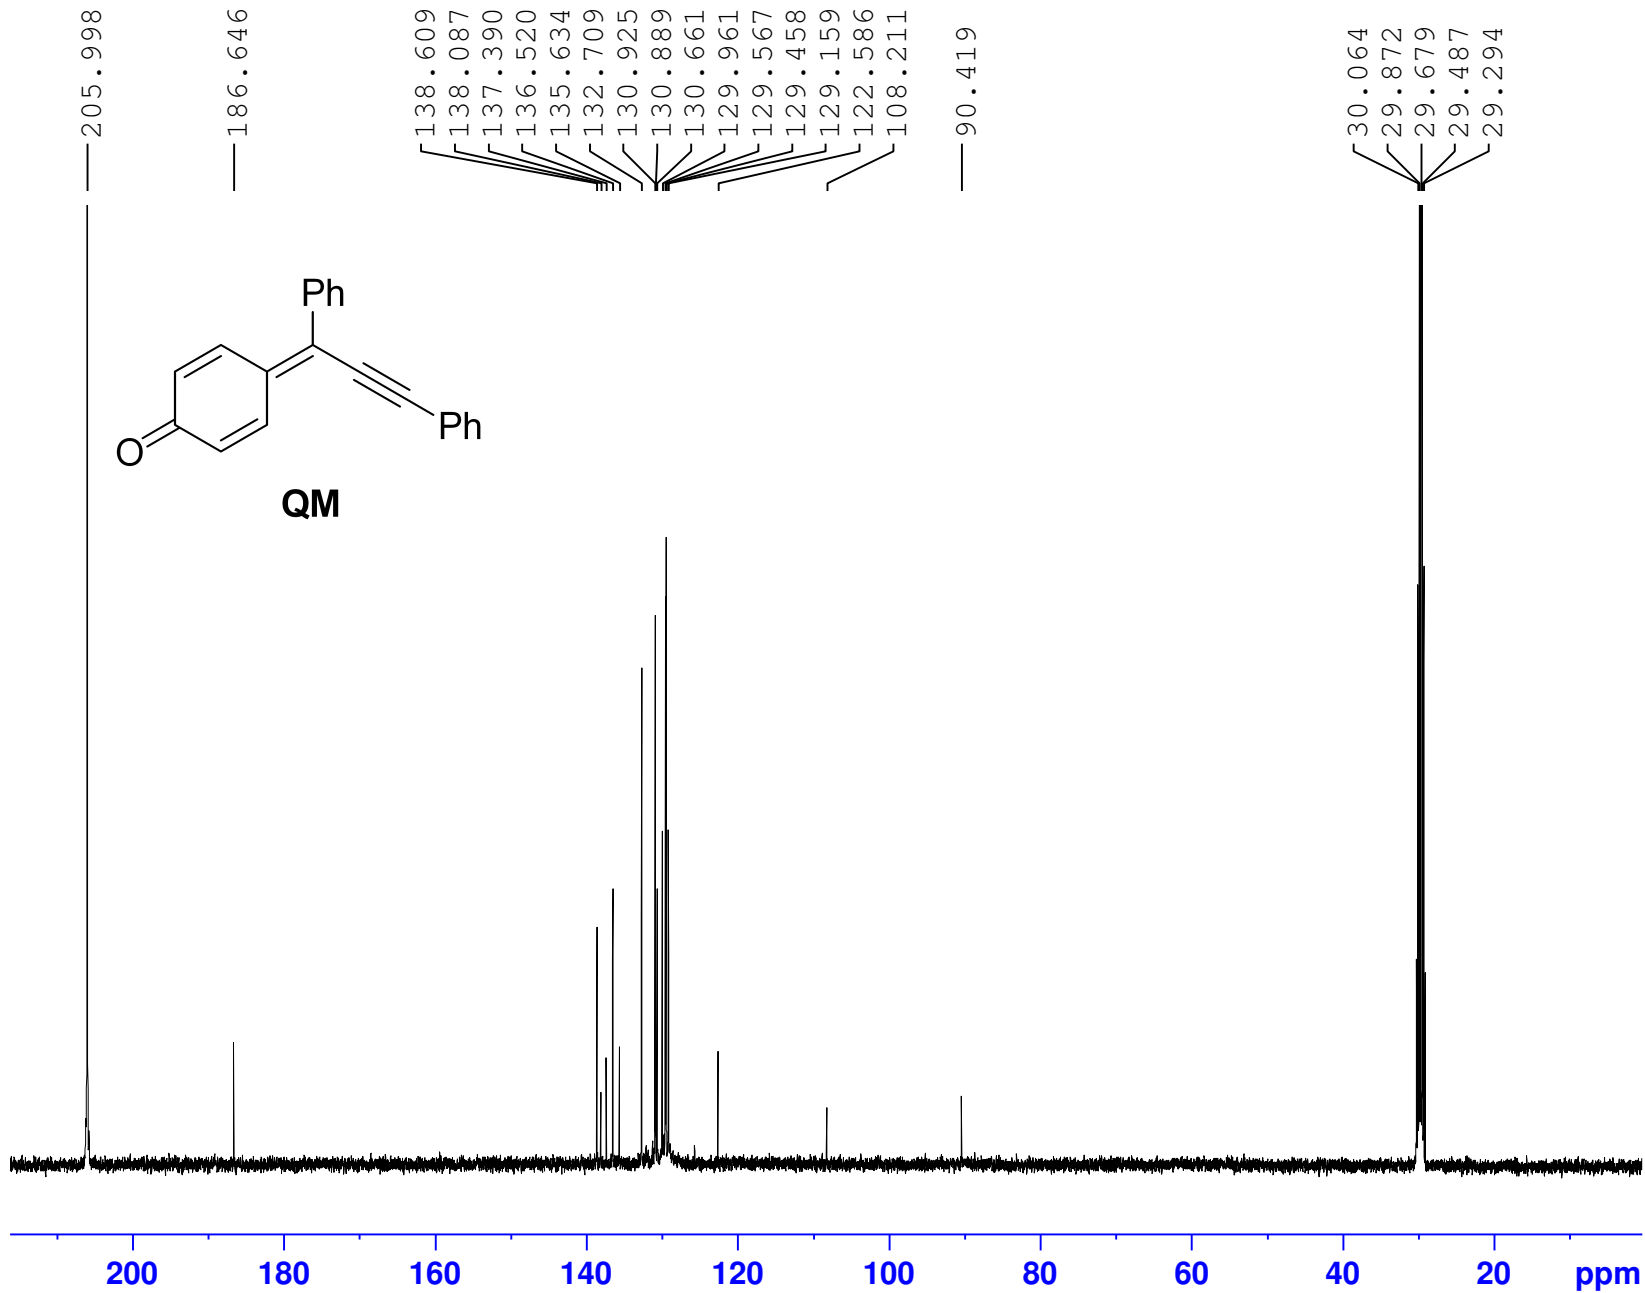

Current Data Parameters  
 NAME qdy-20167-2 C  
 EXPNO 1  
 PROCNO 1

F2 - Acquisition Parameters  
 Date\_ 20160607  
 Time 16.57  
 INSTRUM spect  
 PROBHD 5 mm PABBO BB/  
 PULPROG zgpg30  
 TD 65536  
 SOLVENT Acetone  
 NS 191  
 DS 0  
 SWH 24038.461 Hz  
 FIDRES 0.366798 Hz  
 AQ 1.3631488 sec  
 RG 196.92  
 DW 20.800 usec  
 DE 6.50 usec  
 TE 297.4 K  
 D1 2.00000000 sec  
 D11 0.03000000 sec  
 TD0 1

==== CHANNEL f1 =====  
 SFO1 100.6228298 MHz  
 NUC1 13C  
 P1 9.70 usec  
 PLW1 46.98899841 W

==== CHANNEL f2 =====  
 SFO2 400.1316005 MHz  
 NUC2 1H  
 CPDPRG[2] waltz16  
 PCPD2 90.00 usec  
 PLW2 11.99499989 W  
 PLW12 0.34213999 W  
 PLW13 0.27713001 W

F2 - Processing parameters  
 SI 32768  
 SF 100.6126984 MHz  
 WDW EM  
 SSB 0  
 LB 1.00 Hz  
 GB 0  
 PC 1.40

Supplementary Figure 170. <sup>13</sup>C NMR spectrum for QM

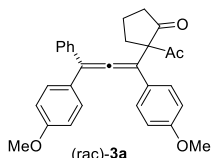

-----  
 Acq. Operator : Seq. Line : 22  
 Acq. Instrument : Instrument 1 Location : Vial 35  
 Injection Date : 12/10/2016 12:38:52 AM Inj : 1  
 Inj Volume : 5.000 µl  
 Acq. Method : C:\CHEM32\1\DATA\QDY 2016-12-09 15-30-48\AD-10-30.M  
 Last changed : 11/30/2015 12:57:24 PM  
 Analysis Method : C:\CHEM32\1\METHODS\AD-50-30.M  
 Last changed : 12/17/2016 10:34:06 PM  
 (modified after loading)  
 Additional Info : Peak(s) manually integrated

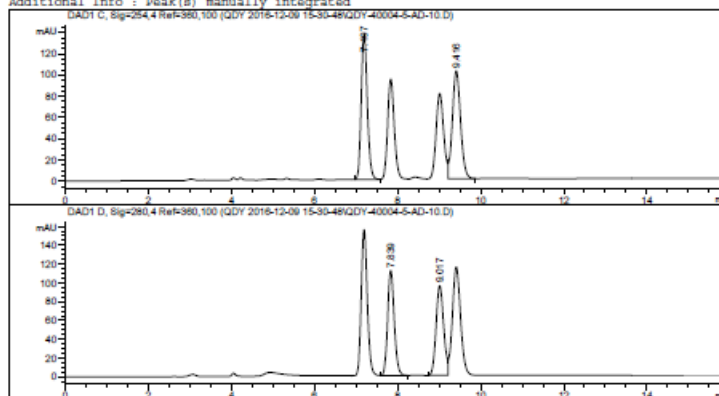

-----  
 Area Percent Report  
 -----

Sorted By : Signal  
 Multiplier : 1.0000  
 Dilution : 1.0000  
 Use Multiplier & Dilution Factor with ISTDs

Signal 1: DAD1 C, Sig-254,4 Ref-360,100

| Peak # | RetTime [min] | Type | Width [min] | Area [mAU*s] | Height [mAU] | Area %  |
|--------|---------------|------|-------------|--------------|--------------|---------|
| 1      | 7.197         | BB   | 0.1562      | 1393.25073   | 137.51768    | 49.9470 |
| 2      | 9.416         | VB   | 0.2099      | 1396.20593   | 101.89838    | 50.0530 |

| Peak # | RetTime [min] | Type | Width [min] | Area [mAU*s] | Height [mAU] | Area %  |
|--------|---------------|------|-------------|--------------|--------------|---------|
| 1      | 7.839         | BB   | 0.1686      | 1232.49475   | 111.78729    | 50.5441 |
| 2      | 9.017         | BV   | 0.1956      | 1205.95996   | 95.34112     | 49.4559 |

Totals : 2789.45667 239.41606 2438.45471 207.12841  
 -----  
 \*\*\* End of Report \*\*\*

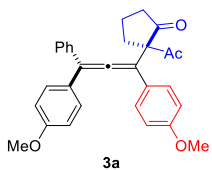

-----  
 Acq. Operator : Seq. Line : 18  
 Acq. Instrument : Instrument 1 Location : Vial 31  
 Injection Date : 12/17/2016 6:13:43 PM Inj : 1  
 Inj Volume : 5.000 µl  
 Acq. Method : C:\CHEM32\1\DATA\QDY 2016-12-17 10-09-58\AD-10-25.M  
 Last changed : 12/17/2016 6:33:07 PM  
 (modified after loading)  
 Analysis Method : C:\CHEM32\1\METHODS\AD-50-30.M  
 Last changed : 12/17/2016 10:21:47 PM  
 (modified after loading)  
 Additional Info : Peak(s) manually integrated

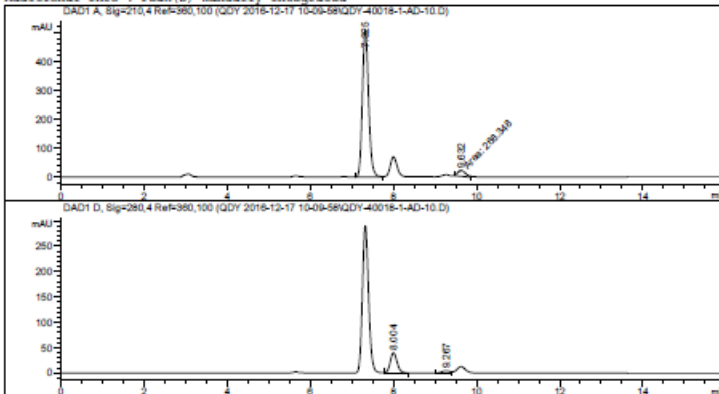

-----  
 Area Percent Report  
 -----

Sorted By : Signal  
 Multiplier : 1.0000  
 Dilution : 1.0000  
 Use Multiplier & Dilution Factor with ISTDs

Signal 1: DAD1 A, Sig-210,4 Ref-360,100

| Peak # | RetTime [min] | Type | Width [min] | Area [mAU*s] | Height [mAU] | Area %  |
|--------|---------------|------|-------------|--------------|--------------|---------|
| 1      | 7.325         | BV   | 0.1588      | 5284.21094   | 510.25525    | 95.1671 |
| 2      | 9.632         | NM   | 0.2169      | 268.34750    | 20.61820     | 4.8329  |

| Peak # | RetTime [min] | Type | Width [min] | Area [mAU*s] | Height [mAU] | Area %  |
|--------|---------------|------|-------------|--------------|--------------|---------|
| 1      | 8.004         | BB   | 0.1768      | 453.72427    | 39.86567     | 89.5725 |
| 2      | 9.267         | BV   | 0.1940      | 52.81998     | 4.21946      | 10.4275 |

Totals : 5552.55844 530.87345 506.54425 44.08513  
 -----  
 \*\*\* End of Report \*\*\*

**Supplementary Figure 171. HPLC spectrum for 3a**



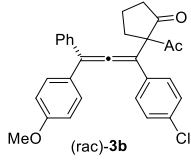

-----  
 Acq. Operator : Seq. Line : 8  
 Acq. Instrument : Instrument 1 Location : Vial 32  
 Injection Data : 12/11/2016 11:13:09 PM Inj : 1  
 Inj Volume : 5.000 µl  
 Acq. Method : C:\CHEM32\1\DATA\QDY 2016-12-11 20-39-38\AD-05-20.M  
 Last changed : 10/14/2015 3:51:32 PM  
 Analysis Method : C:\CHEM32\1\METHODS\AD-50-30.M  
 Last changed : 12/17/2016 10:34:06 PM  
 (modified after loading)  
 Additional Info : Peak(s) manually integrated

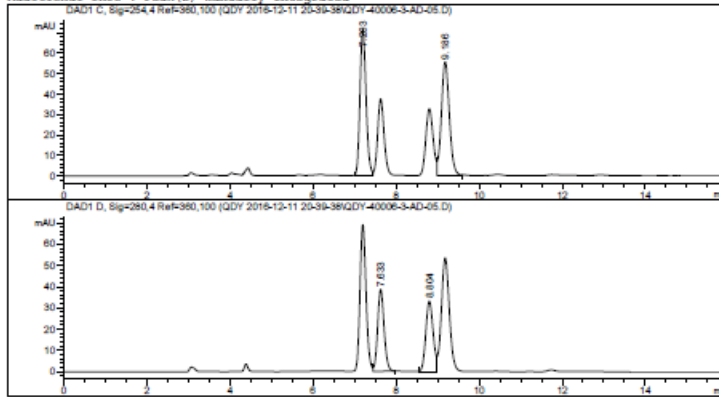

-----  
 Area Percent Report  
 -----

Sorted By : Signal  
 Multiplier : 1.0000  
 Dilution : 1.0000  
 Use Multiplier & Dilution Factor with ISTDs

Signal 1: DAD1 C, Sig=254,4 Ref=360,100

| Peak # | RetTime [min] | Type | Width [min] | Area [mAU*s] | Height [mAU] | Area %  |
|--------|---------------|------|-------------|--------------|--------------|---------|
| 1      | 7.203         | BV   | 0.1562      | 727.00128    | 71.74940     | 49.5600 |
| 2      | 9.186         | VB   | 0.2056      | 739.91150    | 55.46935     | 50.4400 |

Totals : 1466.91278 127.21876

| Peak # | RetTime [min] | Type | Width [min] | Area [mAU*s] | Height [mAU] | Area %  |
|--------|---------------|------|-------------|--------------|--------------|---------|
| 1      | 7.633         | VB   | 0.1661      | 415.61536    | 38.45948     | 50.6287 |
| 2      | 8.804         | BV   | 0.1910      | 405.29398    | 33.07433     | 49.3713 |

Totals : 820.90933 71.53382

\*\*\* End of Report \*\*\*

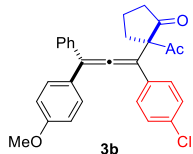

-----  
 Acq. Operator : Seq. Line : 2  
 Acq. Instrument : Instrument 1 Location : Vial 33  
 Injection Data : 12/18/2016 9:26:08 PM Inj : 1  
 Inj Volume : 5.000 µl  
 Acq. Method : C:\CHEM32\1\DATA\QDY 2016-12-18 21-11-49\AD-05-20.M  
 Last changed : 12/18/2016 9:25:14 PM  
 (modified after loading)  
 Analysis Method : C:\CHEM32\1\METHODS\IC-05-30-1.3.M  
 Last changed : 12/18/2016 9:48:04 PM  
 (modified after loading)  
 Additional Info : Peak(s) manually integrated

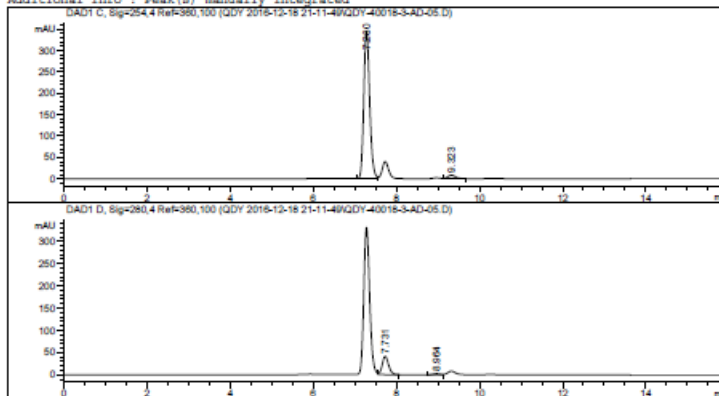

-----  
 Area Percent Report  
 -----

Sorted By : Signal  
 Multiplier : 1.0000  
 Dilution : 1.0000  
 Use Multiplier & Dilution Factor with ISTDs

Signal 1: DAD1 C, Sig=254,4 Ref=360,100

| Peak # | RetTime [min] | Type | Width [min] | Area [mAU*s] | Height [mAU] | Area %  |
|--------|---------------|------|-------------|--------------|--------------|---------|
| 1      | 7.280         | BV   | 0.1504      | 3380.13574   | 344.81693    | 96.7568 |
| 2      | 9.323         | VB   | 0.2039      | 113.29745    | 8.47690      | 3.2432  |

Totals : 3493.43320 353.29382

Signal 2: DAD1 D, Sig=280,4 Ref=360,100

| Peak # | RetTime [min] | Type | Width [min] | Area [mAU*s] | Height [mAU] | Area %  |
|--------|---------------|------|-------------|--------------|--------------|---------|
| 1      | 7.731         | VB   | 0.1628      | 441.41266    | 41.25728     | 94.1989 |
| 2      | 8.964         | BV   | 0.1809      | 27.18377     | 2.31690      | 5.8011  |

Totals : 468.59643 43.57418

\*\*\* End of Report \*\*\*

**Supplementary Figure 172. HPLC spectrum for 3b**

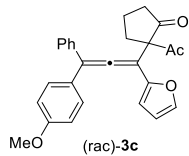

Acq. Operator : Seq. Line : 4  
 Acq. Instrument : Instrument 1 Location : Vial 31  
 Injection Date : 12/26/2016 3:06:26 PM Inj : 1  
 Acq. Method : C:\CHEM32\1\DATA\QDY 2016-12-26 14-09-48\ETOH-AD-03-25-0.5.M  
 Last changed : 12/21/2016 2:33:56 PM  
 Analysis Method : C:\CHEM32\1\METHODS\ETOH-IC-01-25-05.M  
 Last changed : 12/25/2016 12:31:15 AM  
 Additional Info : Peak(s) manually integrated

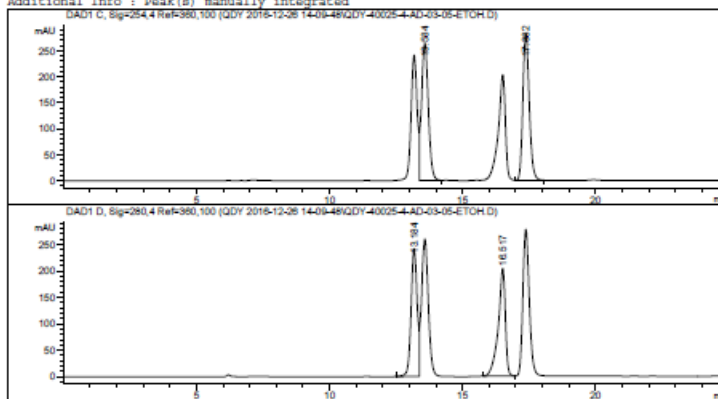

Area Percent Report

Sorted By : Signal  
 Multiplier : 1.0000  
 Dilution : 1.0000  
 Use Multiplier & Dilution Factor with ISTDs

Signal 1: DAD1 C, Sig=254.4 Ref=360,100

| Peak # | RetTime [min] | Type | Width [min] | Area [mAU*s] | Height [mAU] | Area %  |
|--------|---------------|------|-------------|--------------|--------------|---------|
| 1      | 13.584        | VB   | 0.2722      | 4725.58398   | 264.86414    | 49.9491 |
| 2      | 17.382        | VB   | 0.2570      | 4735.20996   | 283.24130    | 50.0509 |

Totals : 9460.79395 548.10544

Signal 2: DAD1 D, Sig=280.4 Ref=360,100

| Peak # | RetTime [min] | Type | Width [min] | Area [mAU*s] | Height [mAU] | Area %  |
|--------|---------------|------|-------------|--------------|--------------|---------|
| 1      | 13.184        | BV   | 0.2422      | 3813.76855   | 241.50697    | 50.1114 |
| 2      | 16.517        | BV   | 0.2696      | 3796.81274   | 203.57631    | 49.8886 |

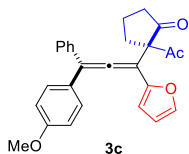

Acq. Operator : Seq. Line : 2  
 Acq. Instrument : Instrument 1 Location : Vial 31  
 Injection Date : 12/25/2016 10:00:57 PM Inj : 1  
 Acq. Method : C:\CHEM32\1\DATA\QDY 2016-12-25 21-36-47\ETOH-AD-03-25-0.5.M  
 Last changed : 12/25/2016 10:12:41 PM  
 (modified after loading)  
 Analysis Method : C:\CHEM32\1\METHODS\ETOH-IC-01-25-05.M  
 Last changed : 12/25/2016 12:31:15 AM  
 Additional Info : Peak(s) manually integrated

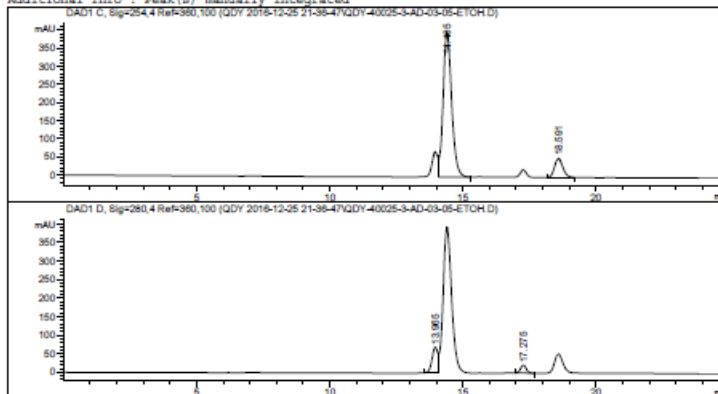

Area Percent Report

Sorted By : Signal  
 Multiplier : 1.0000  
 Dilution : 1.0000  
 Use Multiplier & Dilution Factor with ISTDs

Signal 1: DAD1 C, Sig=254.4 Ref=360,100

| Peak # | RetTime [min] | Type | Width [min] | Area [mAU*s] | Height [mAU] | Area %  |
|--------|---------------|------|-------------|--------------|--------------|---------|
| 1      | 14.405        | VB   | 0.3393      | 8968.72949   | 403.54016    | 88.5462 |
| 2      | 18.591        | BB   | 0.3383      | 1160.14307   | 53.21543     | 11.4538 |

Totals : 1.01289e4 456.75559

| Peak # | RetTime [min] | Type | Width [min] | Area [mAU*s] | Height [mAU] | Area %  |
|--------|---------------|------|-------------|--------------|--------------|---------|
| 1      | 13.965        | BV   | 0.2313      | 1063.85193   | 70.00453     | 76.9423 |
| 2      | 17.275        | BB   | 0.2337      | 318.80972    | 21.17364     | 23.0577 |

Totals : 1382.66165 91.17817

\*\*\* End of Report \*\*\*

Supplementary Figure 173. HPLC spectrum for 3c

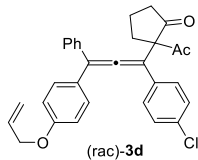

-----  
 Acq. Operator : Seq. Line : 2  
 Acq. Instrument : Instrument 1 Location : Vial 33  
 Injection Date : 12/22/2016 10:42:58 AM Inj : 1  
 Inj Volume : 5.000 µl  
 Acq. Method : C:\CHEM32\1\DATA\QDY 2016-12-22 10-13-49\QDY 40022-3-AD-0305-ETOH.D  
 Last changed : 12/22/2016 11:03:45 AM  
 (modified after loading)  
 Analysis Method : C:\CHEM32\1\METHODS\AD-03-25-07.M  
 Last changed : 12/21/2016 7:43:26 PM  
 Additional Info : Peak(s) manually integrated

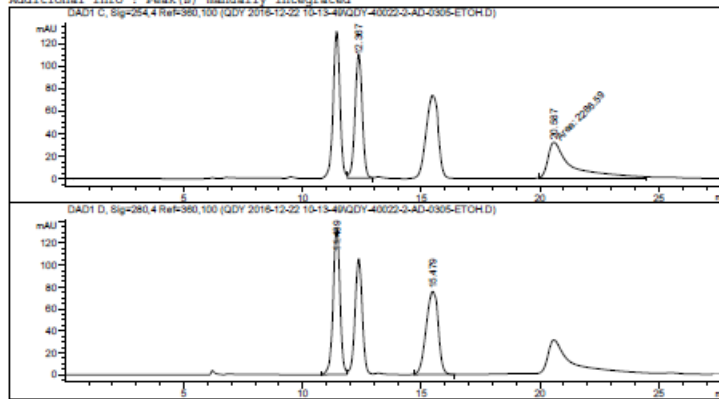

-----  
 Area Percent Report  
 -----

Sorted By : Signal  
 Multiplier : 1.0000  
 Dilution : 1.0000  
 Use Multiplier & Dilution Factor with ISTDs

Signal 1: DAD1 C, Sig=254.4 Ref=360,100

| Peak # | RetTime [min] | Type | Width [min] | Area [mAU*s] | Height [mAU] | Area %  |
|--------|---------------|------|-------------|--------------|--------------|---------|
| 1      | 12.367        | VB   | 0.3293      | 2336.37280   | 110.21536    | 50.5384 |
| 2      | 20.587        | NM   | 1.1878      | 2286.59106   | 32.08462     | 49.4616 |

Totals : 4622.96387 142.29998

| Peak # | RetTime [min] | Type | Width [min] | Area [mAU*s] | Height [mAU] | Area %  |
|--------|---------------|------|-------------|--------------|--------------|---------|
| 1      | 11.439        | BV   | 0.3084      | 2670.96265   | 134.09711    | 49.8320 |
| 2      | 15.479        | BB   | 0.5162      | 2688.97021   | 75.73504     | 50.1680 |

Totals : 5359.93286 209.83215

\*\*\* End of Report \*\*\*

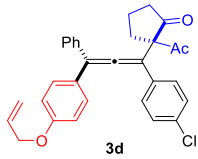

-----  
 Acq. Operator : Seq. Line : 7  
 Acq. Instrument : Instrument 1 Location : Vial 33  
 Injection Date : 12/23/2016 12:06:26 PM Inj : 1  
 Inj Volume : 5.000 µl  
 Acq. Method : C:\CHEM32\1\DATA\QDY 2016-12-23 10-16-57\QDY 40022-3-ADH-0305-ETOH.D  
 Last changed : 12/21/2016 2:33:56 PM  
 Analysis Method : C:\CHEM32\1\METHODS\AD-03-25-07.M  
 Last changed : 12/23/2016 1:47:07 PM  
 (modified after loading)  
 Additional Info : Peak(s) manually integrated

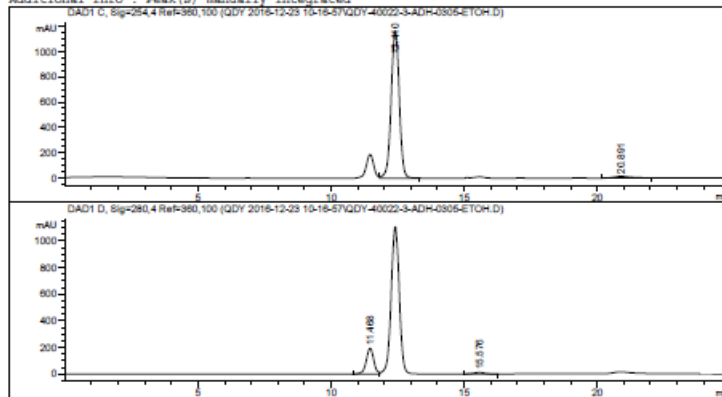

-----  
 Area Percent Report  
 -----

Sorted By : Signal  
 Multiplier : 1.0000  
 Dilution : 1.0000  
 Use Multiplier & Dilution Factor with ISTDs

Signal 1: DAD1 C, Sig=254.4 Ref=360,100

| Peak # | RetTime [min] | Type | Width [min] | Area [mAU*s] | Height [mAU] | Area %  |
|--------|---------------|------|-------------|--------------|--------------|---------|
| 1      | 12.410        | VB   | 0.3327      | 2.48662e4    | 1166.35120   | 97.6844 |
| 2      | 20.891        | BB   | 0.6552      | 589.45648    | 13.50646     | 2.3156  |

Totals : 2.54557e4 1179.85765

| Peak # | RetTime [min] | Type | Width [min] | Area [mAU*s] | Height [mAU] | Area %  |
|--------|---------------|------|-------------|--------------|--------------|---------|
| 1      | 11.468        | BV   | 0.3041      | 3771.59863   | 192.94066    | 92.3225 |
| 2      | 15.576        | BB   | 0.3789      | 313.64468    | 11.61888     | 7.6775  |

Totals : 4085.24332 204.55954

\*\*\* End of Report \*\*\*

**Supplementary Figure 174. HPLC spectrum for 3d**

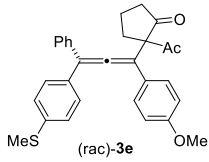

Acq. Operator : Seq. Line : 3  
 Acq. Instrument : Instrument 1 Location : Vial 35  
 Injection Date : 12/17/2016 11:07:14 AM Inj : 1  
 Inj Volume : 5.000 µl  
 Acq. Method : C:\CHEM32\1\DATA\QDY 2016-12-17 10-09-58\AD-10-25.M  
 Last changed : 12/17/2016 11:22:08 AM  
 (modified after loading)  
 Analysis Method : C:\CHEM32\1\METHODS\AD-50-30.M  
 Last changed : 12/17/2016 10:28:54 PM  
 (modified after loading)  
 Additional Info : Peak(s) manually integrated

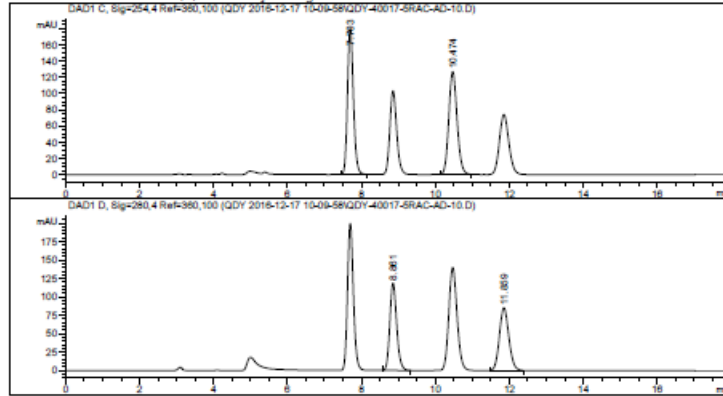

Area Percent Report

Sorted By : Signal  
 Multiplier : 1.0000  
 Dilution : 1.0000  
 Use Multiplier & Dilution Factor with ISTDs

Signal 1: DAD1 C, Sig=254.4 Ref=360,100

| Peak # | RetTime [min] | Type | Width [min] | Area [mAU*s] | Height [mAU] | Area %  |
|--------|---------------|------|-------------|--------------|--------------|---------|
| 1      | 7.703         | BB   | 0.1708      | 1999.58411   | 181.13736    | 50.3226 |
| 2      | 10.474        | BB   | 0.2418      | 1973.94446   | 126.68971    | 49.6774 |

Totals : 3973.52856 307.82707

Signal 2: DAD1 D, Sig=280.4 Ref=360,100

| Peak # | RetTime [min] | Type | Width [min] | Area [mAU*s] | Height [mAU] | Area %  |
|--------|---------------|------|-------------|--------------|--------------|---------|
| 1      | 8.861         | BB   | 0.1986      | 1530.18848   | 118.56132    | 50.2966 |
| 2      | 11.859        | BB   | 0.2754      | 1512.13953   | 85.07885     | 49.7034 |

Totals : 3042.32800 203.64017

\*\*\* End of Report \*\*\*

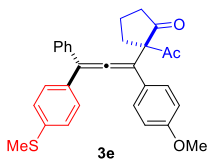

Acq. Operator : Seq. Line : 19  
 Acq. Instrument : Instrument 1 Location : Vial 32  
 Injection Date : 12/17/2016 6:34:55 PM Inj : 1  
 Inj Volume : 5.000 µl  
 Acq. Method : C:\CHEM32\1\DATA\QDY 2016-12-17 10-09-58\AD-10-25.M  
 Last changed : 12/17/2016 6:33:07 PM  
 (modified after loading)  
 Analysis Method : C:\CHEM32\1\METHODS\AD-50-30.M  
 Last changed : 12/17/2016 10:28:54 PM  
 (modified after loading)  
 Additional Info : Peak(s) manually integrated

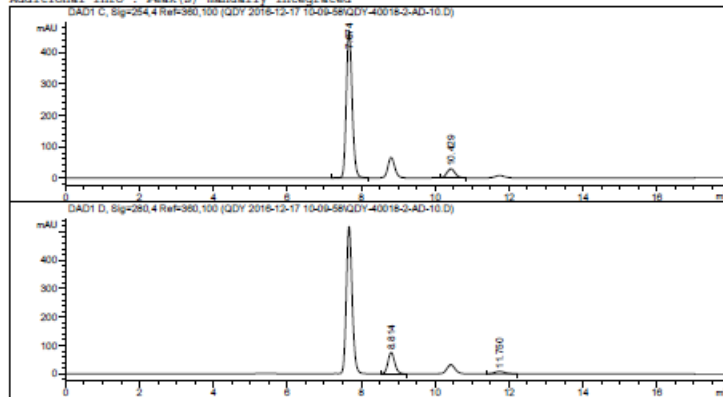

Area Percent Report

Sorted By : Signal  
 Multiplier : 1.0000  
 Dilution : 1.0000  
 Use Multiplier & Dilution Factor with ISTDs

Signal 1: DAD1 C, Sig=254.4 Ref=360,100

| Peak # | RetTime [min] | Type | Width [min] | Area [mAU*s] | Height [mAU] | Area %  |
|--------|---------------|------|-------------|--------------|--------------|---------|
| 1      | 7.674         | BB   | 0.1701      | 5147.08936   | 468.59857    | 91.9216 |
| 2      | 10.429        | BB   | 0.2391      | 452.34695    | 29.13834     | 8.0784  |

Totals : 5599.43631 497.73691

Signal 2: DAD1 D, Sig=280.4 Ref=360,100

| Peak # | RetTime [min] | Type | Width [min] | Area [mAU*s] | Height [mAU] | Area %  |
|--------|---------------|------|-------------|--------------|--------------|---------|
| 1      | 8.814         | BB   | 0.1962      | 954.48505    | 75.15132     | 85.9938 |
| 2      | 11.750        | BB   | 0.2766      | 155.46130    | 8.61222      | 14.0062 |

Totals : 1109.94635 83.76354

\*\*\* End of Report \*\*\*

Supplementary Figure 175. HPLC spectrum for 3e

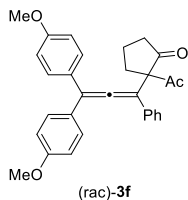

-----  
 Acq. Operator : Seq. Line : 22  
 Acq. Instrument : Instrument 1 Location : Vial 34  
 Injection Date : 12/1/2016 11:43:21 PM Inj : 1  
 Inj Volume : 5.000 µl  
 Acq. Method : C:\CHEM32\1\DATA\QDY 2016-12-01 15-06-50\AD-10-30.M  
 Last changed : 12/1/2016 10:27:40 PM  
 (modified after loading)  
 Analysis Method : C:\CHEM32\1\METHODS\RTGH-IC-01-25-05.M  
 Last changed : 1/1/2017 3:00:17 PM  
 (modified after loading)  
 Additional Info : Peak(s) manually integrated

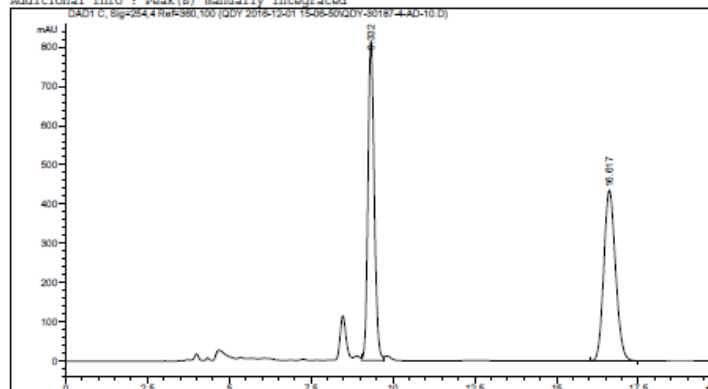

-----  
 Area Percent Report  
 -----

Sorted By : Signal  
 Multiplier : 1.0000  
 Dilution : 1.0000  
 Use Multiplier & Dilution Factor with ISTDs

Signal 1: DAD1 C, Sig=254,4 Ref=360,100

| Peak # | RetTime [min] | Type | Width [min] | Area [mAU*s] | Height [mAU] | Area %  |
|--------|---------------|------|-------------|--------------|--------------|---------|
| 1      | 9.332         | VV   | 0.2081      | 1.09001e4    | 814.87524    | 50.0876 |
| 2      | 16.617        | BB   | 0.3873      | 1.08620e4    | 435.09927    | 49.9124 |

Totals : 2.17621e4 1249.97452

-----  
 \*\*\* End of Report \*\*\*  
 -----

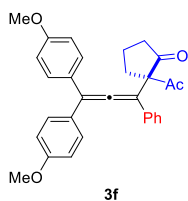

-----  
 Acq. Operator : Seq. Line : 24  
 Acq. Instrument : Instrument 1 Location : Vial 31  
 Injection Date : 12/22/2016 11:57:21 PM Inj : 1  
 Inj Volume : 5.000 µl  
 Acq. Method : C:\CHEM32\1\DATA\QDY 2016-12-22 16-06-21\AD-10-25.M  
 Last changed : 9/12/2015 7:30:37 PM  
 Analysis Method : C:\CHEM32\1\METHODS\AD-03-25-07.M  
 Last changed : 12/22/2016 7:51:24 PM  
 (modified after loading)  
 Additional Info : Peak(s) manually integrated

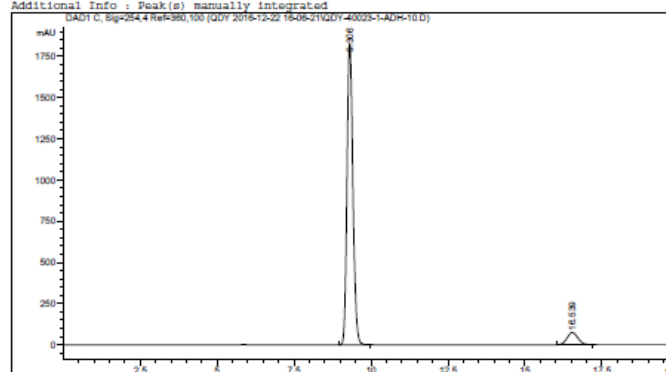

-----  
 Area Percent Report  
 -----

Sorted By : Signal  
 Multiplier : 1.0000  
 Dilution : 1.0000  
 Use Multiplier & Dilution Factor with ISTDs

Signal 1: DAD1 C, Sig=254,4 Ref=360,100

| Peak # | RetTime [min] | Type | Width [min] | Area [mAU*s] | Height [mAU] | Area %  |
|--------|---------------|------|-------------|--------------|--------------|---------|
| 1      | 9.306         | BB   | 0.2050      | 2.42926e4    | 1828.79016   | 92.9066 |
| 2      | 16.539        | BB   | 0.3852      | 1854.72717   | 74.82449     | 7.0934  |

Totals : 2.61473e4 1903.61465

-----  
 \*\*\* End of Report \*\*\*  
 -----

**Supplementary Figure 176. HPLC spectrum for 3f**

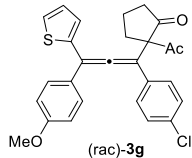

Acq. Operator : Seq. Line : 19  
 Acq. Instrument : Instrument 1 Location : Vial 33  
 Injection Date : 12/14/2016 5:19:42 PM Inj : 1  
 Inj Volume : 5.000 µl  
 Acq. Method : C:\CHEM32\1\DATA\QDY 2016-12-14 09-56-02\AD-05-20.M  
 Last changed : 12/14/2016 5:18:48 PM (modified after loading)  
 Analysis Method : C:\CHEM32\1\METHODS\AD-50-30.M  
 Last changed : 12/18/2016 9:24:07 PM (modified after loading)

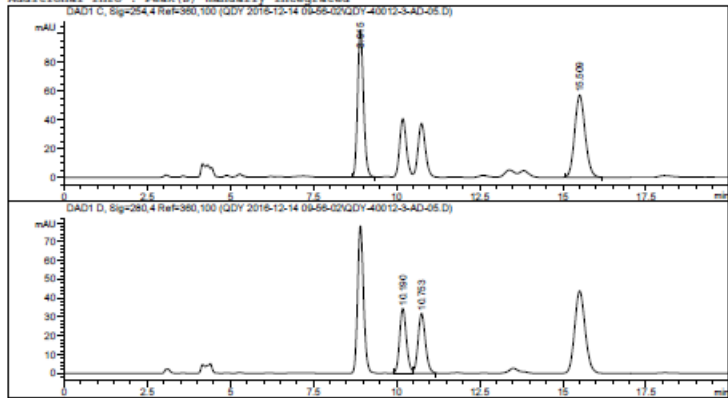

Area Percent Report

Sorted By : Signal  
 Multiplier : 1.0000  
 Dilution : 1.0000  
 Use Multiplier & Dilution Factor with ISTDs

Signal 1: DAD1 C, Sig=254,4 Ref=360,100

| Peak #   | RetTime [min] | Type | Width [min] | Area [mAU*s] | Height [mAU] | Area %  |
|----------|---------------|------|-------------|--------------|--------------|---------|
| 1        | 8.915         | BB   | 0.1908      | 1271.38049   | 102.41248    | 50.2509 |
| 2        | 15.509        | BB   | 0.3401      | 1258.68274   | 57.34032     | 49.7491 |
| Totals : |               |      |             | 2530.06323   | 159.75280    |         |

Signal 2: DAD1 D, Sig=280,4 Ref=360,100

| Peak #   | RetTime [min] | Type | Width [min] | Area [mAU*s] | Height [mAU] | Area %  |
|----------|---------------|------|-------------|--------------|--------------|---------|
| 1        | 10.190        | BV   | 0.2195      | 487.97296    | 34.39703     | 49.8834 |
| 2        | 10.753        | VB   | 0.2379      | 490.25323    | 31.79630     | 50.1166 |
| Totals : |               |      |             | 978.22620    | 66.19333     |         |

\*\*\* End of Report \*\*\*

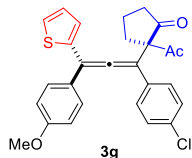

Acq. Operator : Seq. Line : 41  
 Acq. Instrument : Instrument 1 Location : Vial 34  
 Injection Date : 12/18/2016 2:53:23 AM Inj : 1  
 Inj Volume : 5.000 µl  
 Acq. Method : C:\CHEM32\1\DATA\QDY 2016-12-17 10-09-58\AD-05-20.M  
 Last changed : 12/18/2016 2:30:04 AM (modified after loading)  
 Analysis Method : C:\CHEM32\1\METHODS\AD-50-30.M  
 Last changed : 12/18/2016 9:40:47 PM (modified after loading)

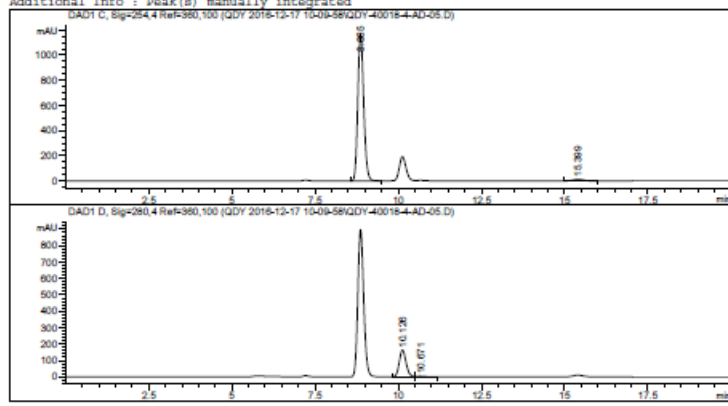

Area Percent Report

Sorted By : Signal  
 Multiplier : 1.0000  
 Dilution : 1.0000  
 Use Multiplier & Dilution Factor with ISTDs

Signal 1: DAD1 C, Sig=254,4 Ref=360,100

| Peak #   | RetTime [min] | Type | Width [min] | Area [mAU*s] | Height [mAU] | Area %  |
|----------|---------------|------|-------------|--------------|--------------|---------|
| 1        | 8.865         | BB   | 0.1898      | 1.44274e4    | 1170.38037   | 97.9690 |
| 2        | 15.399        | BB   | 0.3363      | 299.08856    | 13.72236     | 2.0310  |
| Totals : |               |      |             | 1.47265e4    | 1184.10273   |         |

Signal 2: DAD1 D, Sig=280,4 Ref=360,100

| Peak #   | RetTime [min] | Type | Width [min] | Area [mAU*s] | Height [mAU] | Area %  |
|----------|---------------|------|-------------|--------------|--------------|---------|
| 1        | 10.126        | BV   | 0.2185      | 2298.65723   | 163.05170    | 97.5052 |
| 2        | 10.671        | VB   | 0.2264      | 58.81377     | 3.98117      | 2.4948  |
| Totals : |               |      |             | 2357.47100   | 167.03287    |         |

\*\*\* End of Report \*\*\*

Supplementary Figure 177. HPLC spectrum for 3g

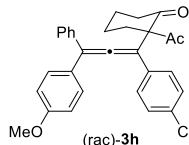

Acq. Operator : Instrument 1 Seq. Line : 9  
 Acq. Instrument : Instrument 1 Location : Vial 31  
 Injection Date : 12/20/2016 1:59:46 PM Inj : 1  
 Acq. Method : C:\CHEM32\1\DATA\QDY 2016-12-20 10-04-00\QDY-40020-1-ADH-05.D Inj Volume : 5.000 ul  
 Last changed : 12/20/2016 1:58:54 PM (modified after loading)  
 Analysis Method : C:\CHEM32\1\METHODS\ETOH-IC-01-25-05.M  
 Last changed : 12/26/2016 1:11:51 PM (modified after loading)

Additional Info : Peak(s) manually integrated

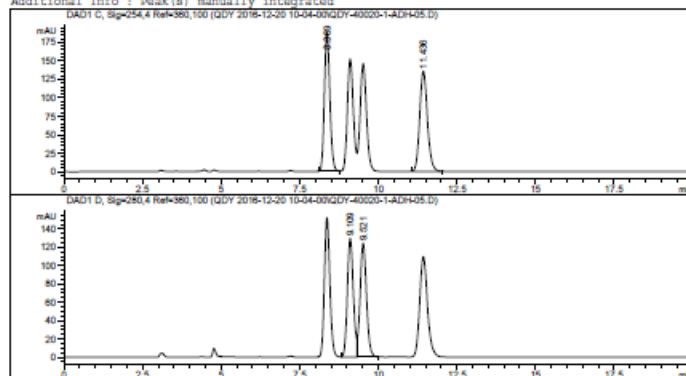

Area Percent Report

Sorted By : Signal  
 Multiplier : 1.0000  
 Dilution : 1.0000  
 Use Multiplier & Dilution Factor with ISTDs

Signal 1: DAD1 C, Sig=254,4 Ref=360,100

| Peak # | RetTime [min] | Type | Width [min] | Area [mAU*s] | Height [mAU] | Area %  |
|--------|---------------|------|-------------|--------------|--------------|---------|
| 1      | 8.369         | BB   | 0.1877      | 2288.36597   | 188.41090    | 49.7870 |
| 2      | 11.436        | BB   | 0.2625      | 2307.94678   | 135.61908    | 50.2130 |

Totals : 4596.31274 324.02998

Signal 2: DAD1 D, Sig=280,4 Ref=360,100

| Peak # | RetTime [min] | Type | Width [min] | Area [mAU*s] | Height [mAU] | Area %  |
|--------|---------------|------|-------------|--------------|--------------|---------|
| 1      | 9.109         | BV   | 0.2034      | 1703.65442   | 129.56859    | 49.2211 |
| 2      | 9.521         | VB   | 0.2189      | 1757.57336   | 124.31697    | 50.7789 |

Totals : 3461.22778 253.88556

\*\*\* End of Report \*\*\*

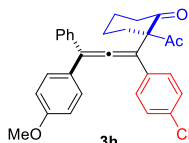

Acq. Operator : Instrument 1 Seq. Line : 2  
 Acq. Instrument : Instrument 1 Location : Vial 34  
 Injection Date : 12/28/2016 3:53:13 PM Inj : 1  
 Different Inj Volume from Sequence ! Actual Inj Volume : 6.000 ul  
 Acq. Method : C:\CHEM32\1\DATA\QDY 2016-12-28 15-38-58\QDY-40020-4-ADHD.M Inj Volume : 5.000 ul  
 Last changed : 12/28/2016 3:52:19 PM (modified after loading)  
 Analysis Method : C:\CHEM32\1\METHODS\ETOH-IC-01-25-05.M  
 Last changed : 12/25/2016 12:31:15 AM

Additional Info : Peak(s) manually integrated

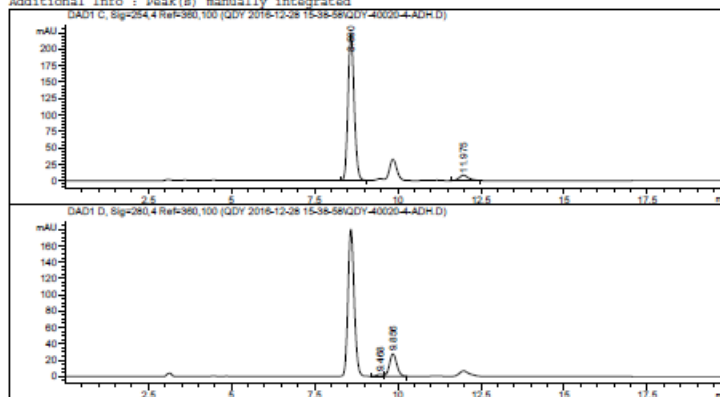

Area Percent Report

Sorted By : Signal  
 Multiplier : 1.0000  
 Dilution : 1.0000  
 Use Multiplier & Dilution Factor with ISTDs

Signal 1: DAD1 C, Sig=254,4 Ref=360,100

| Peak # | RetTime [min] | Type | Width [min] | Area [mAU*s] | Height [mAU] | Area %  |
|--------|---------------|------|-------------|--------------|--------------|---------|
| 1      | 8.590         | BB   | 0.1994      | 2898.87183   | 223.33513    | 94.8538 |
| 2      | 11.975        | BB   | 0.2967      | 157.27544    | 8.02446      | 5.1462  |

Totals : 3056.14726 231.35959

Signal 2: DAD1 D, Sig=280,4 Ref=360,100

| Peak # | RetTime [min] | Type | Width [min] | Area [mAU*s] | Height [mAU] | Area %  |
|--------|---------------|------|-------------|--------------|--------------|---------|
| 1      | 9.468         | BV   | 0.1947      | 30.80071     | 2.44990      | 6.8343  |
| 2      | 9.856         | VB   | 0.2345      | 419.87592    | 27.75845     | 93.1657 |

Totals : 450.67662 30.20835

\*\*\* End of Report \*\*\*

Supplementary Figure 178. HPLC spectrum for 3h

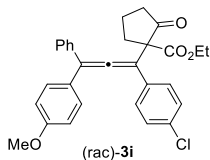

Acq. Operator : Seq. Line : 41  
 Acq. Instrument : Instrument 1 Location : Vial 34  
 Injection Date : 12/16/2016 1:40:39 AM Inj : 1  
 Inj Volume : 5.000 µl  
 Acq. Method : C:\CHEM32\1\DATA\QDY 2016-12-15 09-57-24\IC-05-30.M  
 Last changed : 8/23/2012 1:59:23 PM  
 Analysis Method : C:\CHEM32\1\METHODS\AD-03-25-07.M  
 Last changed : 12/23/2016 11:10:32 AM  
 (modified after loading)

Additional Info : Peak(s) manually integrated

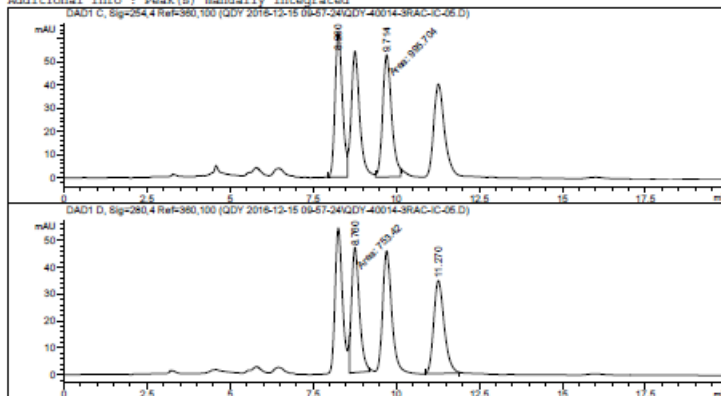

Area Percent Report

Sorted By : Signal  
 Multiplier : 1.0000  
 Dilution : 1.0000  
 Use Multiplier & Dilution Factor with ISTDs

Signal 1: DAD1 C, Sig=254.4 Ref=360,100

| Peak # | RetTime [min] | Type | Width [min] | Area [mAU*s] | Height [mAU] | Area %  |
|--------|---------------|------|-------------|--------------|--------------|---------|
| 1      | 8.260         | BV   | 0.2355      | 966.61340    | 62.83598     | 49.2588 |
| 2      | 9.714         | MF   | 0.3144      | 995.70392    | 52.78615     | 50.7412 |

Totals : 1962.31732 115.62213

| Peak # | RetTime [min] | Type | Width [min] | Area [mAU*s] | Height [mAU] | Area %  |
|--------|---------------|------|-------------|--------------|--------------|---------|
| 1      | 8.760         | FM   | 0.2696      | 753.42029    | 46.57753     | 49.8034 |
| 2      | 11.270        | BB   | 0.3366      | 759.36938    | 34.52636     | 50.1966 |

Totals : 1512.78967 81.10389

\*\*\* End of Report \*\*\*

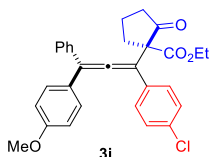

Acq. Operator : Seq. Line : 6  
 Acq. Instrument : Instrument 1 Location : Vial 31  
 Injection Date : 12/24/2016 12:20:45 AM Inj : 1  
 Inj Volume : 5.000 µl  
 Acq. Method : C:\CHEM32\1\DATA\QDY 2016-12-23 23-08-46\IC-05-30.M  
 Last changed : 12/24/2016 12:19:53 AM  
 Analysis Method : C:\CHEM32\1\METHODS\AD-03-25-07.M  
 Last changed : 12/24/2016 10:24:47 AM  
 (modified after loading)

Additional Info : Peak(s) manually integrated

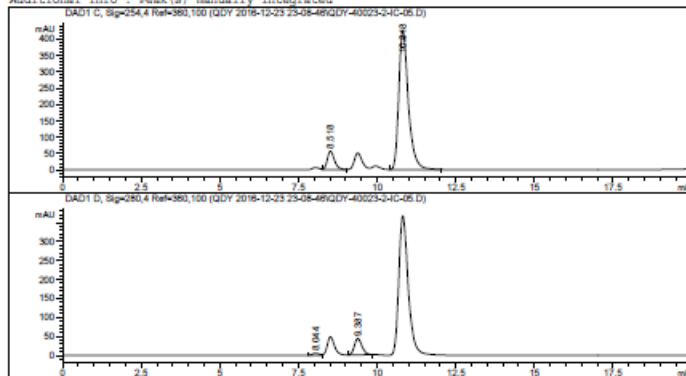

Area Percent Report

Sorted By : Signal  
 Multiplier : 1.0000  
 Dilution : 1.0000  
 Use Multiplier & Dilution Factor with ISTDs

Signal 1: DAD1 C, Sig=254.4 Ref=360,100

| Peak # | RetTime [min] | Type | Width [min] | Area [mAU*s] | Height [mAU] | Area %  |
|--------|---------------|------|-------------|--------------|--------------|---------|
| 1      | 8.518         | VB   | 0.2444      | 920.95679    | 57.03419     | 9.2614  |
| 2      | 10.818        | BB   | 0.3211      | 9023.05469   | 426.03329    | 90.7386 |

Totals : 9944.01147 483.06748

Signal 2: DAD1 D, Sig=280.4 Ref=360,100

| Peak # | RetTime [min] | Type | Width [min] | Area [mAU*s] | Height [mAU] | Area %  |
|--------|---------------|------|-------------|--------------|--------------|---------|
| 1      | 8.044         | BV   | 0.2093      | 74.39173     | 5.51589      | 9.3557  |
| 2      | 9.387         | BB   | 0.2595      | 720.75873    | 43.01805     | 90.6443 |

Totals : 795.15046 48.53394

\*\*\* End of Report \*\*\*

Supplementary Figure 179. HPLC spectrum for 3i



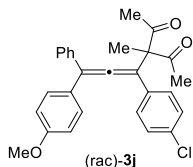

-----  
 Acq. Operator : Seq. Line : 6  
 Acq. Instrument : Instrument 1 Location : Vial 33  
 Injection Date : 12/24/2016 11:58:45 PM Inj : 1  
 Inj Volume : 5.000 ul  
 Acq. Method : C:\CHEM32\1\DATA\QDY 2016-12-24 22-17-41\AD-05-20.M  
 Last changed : 12/24/2016 11:57:53 PM  
 (modified after loading)  
 Analysis Method : C:\CHEM32\1\METHODS\ETCH-IC-01-25-05.M  
 Last changed : 12/25/2016 12:31:15 AM  
 Additional Info : Peak(s) manually integrated

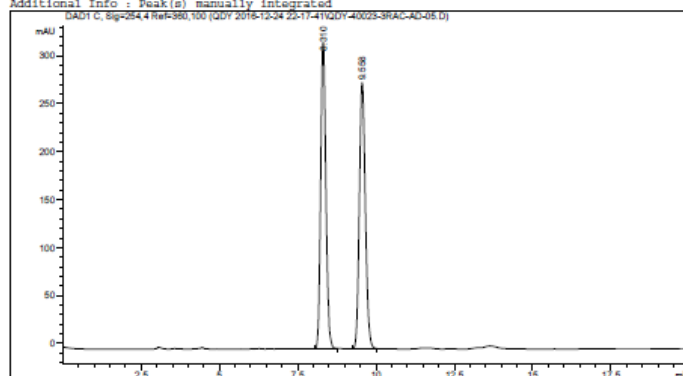

-----  
 Area Percent Report  
 -----

Sorted By : Signal  
 Multiplier : 1.0000  
 Dilution : 1.0000  
 Use Multiplier & Dilution Factor with ISTDs

Signal 1: DAD1 C, Sig=254,4 Ref=360,100

| Peak #   | RetTime [min] | Type | Width [min] | Area [mAU*s] | Height [mAU] | Area %  |
|----------|---------------|------|-------------|--------------|--------------|---------|
| 1        | 8.310         | BB   | 0.1792      | 3708.74731   | 320.02621    | 49.9828 |
| 2        | 9.558         | BB   | 0.2079      | 3711.30029   | 277.69928    | 50.0172 |
| Totals : |               |      |             | 7420.04761   | 597.72549    |         |

-----  
 \*\*\* End of Report \*\*\*

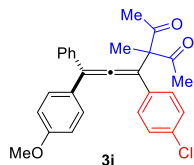

-----  
 Acq. Operator : Seq. Line : 7  
 Acq. Instrument : Instrument 1 Location : Vial 33  
 Injection Date : 12/27/2016 4:04:03 PM Inj : 1  
 Inj Volume : 5.000 ul  
 Acq. Method : C:\CHEM32\1\DATA\QDY 2016-12-27 13-26-35\AD-05-20.M  
 Last changed : 12/27/2016 4:03:11 PM  
 (modified after loading)  
 Analysis Method : C:\CHEM32\1\METHODS\ETCH-IC-01-25-05.M  
 Last changed : 12/25/2016 12:31:15 AM  
 Additional Info : Peak(s) manually integrated

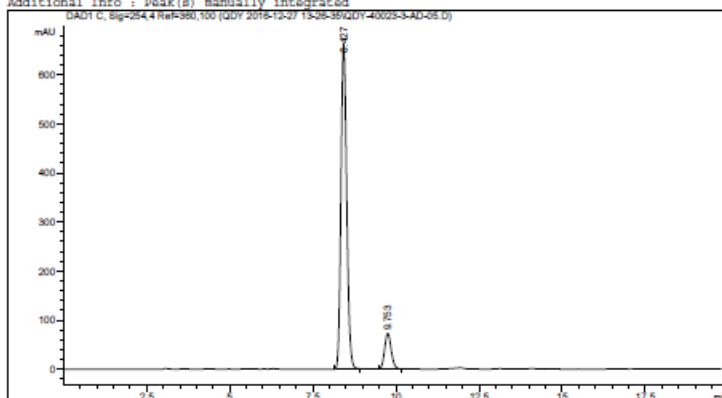

-----  
 Area Percent Report  
 -----

Sorted By : Signal  
 Multiplier : 1.0000  
 Dilution : 1.0000  
 Use Multiplier & Dilution Factor with ISTDs

Signal 1: DAD1 C, Sig=254,4 Ref=360,100

| Peak #   | RetTime [min] | Type | Width [min] | Area [mAU*s] | Height [mAU] | Area %  |
|----------|---------------|------|-------------|--------------|--------------|---------|
| 1        | 8.427         | BB   | 0.1858      | 7953.15088   | 663.68365    | 88.7915 |
| 2        | 9.753         | BB   | 0.2127      | 1003.95966   | 72.87911     | 11.2085 |
| Totals : |               |      |             | 8957.11053   | 736.56277    |         |

-----  
 \*\*\* End of Report \*\*\*

**Supplementary Figure 180. HPLC spectrum for 3j**

Sample Name:

```

=====
Acq. Operator   :                               Seq. Line :    8
Acq. Instrument : Instrument 1                   Location  : Vial 36
Injection Date  : 3/25/2016 2:13:03 PM          Inj       :    1
                                                    Inj Volume: 5.000 µl

Acq. Method    : C:\CHEM32\1\DATA\DEF_LC 2016-03-25 12-31-37\IC-05-30.M
Last changed   : 3/25/2016 2:12:13 PM
                (modified after loading)
Analysis Method : C:\CHEM32\1\METHODS\IC-15-30.M
Last changed   : 8/20/2016 4:34:19 PM
                (modified after loading)
Additional Info : Peak(s) manually integrated
  
```

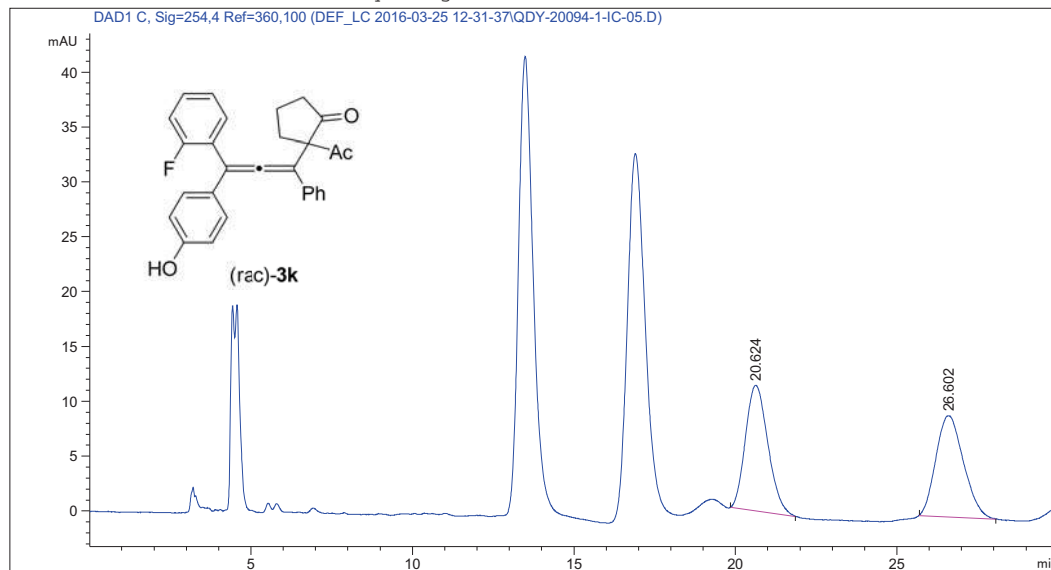

```

=====
Area Percent Report
=====
  
```

```

Sorted By      :      Signal
Multiplier     :      1.0000
Dilution       :      1.0000
Use Multiplier & Dilution Factor with ISTDs
  
```

Signal 1: DAD1 C, Sig=254,4 Ref=360,100

| Peak # | RetTime [min] | Type | Width [min] | Area [mAU*s] | Height [mAU] | Area %  |
|--------|---------------|------|-------------|--------------|--------------|---------|
| 1      | 20.624        | BB   | 0.6286      | 556.81903    | 11.46449     | 50.2834 |
| 2      | 26.602        | BB   | 0.7284      | 550.54340    | 9.25036      | 49.7166 |

Totals :                                    1107.36243    20.71485

Sample Name:

```

=====
Acq. Operator   :                               Seq. Line :    2
Acq. Instrument : Instrument 1                   Location  : Vial 32
Injection Date  : 3/25/2016 9:55:53 PM          Inj       :    1
                                                    Inj Volume: 5.000 µl

Acq. Method    : C:\CHEM32\1\DATA\DEF_LC 2016-03-25 21-42-05\IC-05-30.M
Last changed   : 3/25/2016 9:55:02 PM
                (modified after loading)
Analysis Method : C:\CHEM32\1\METHODS\IC-15-30.M
Last changed   : 8/20/2016 4:34:19 PM
                (modified after loading)
Additional Info : Peak(s) manually integrated
  
```

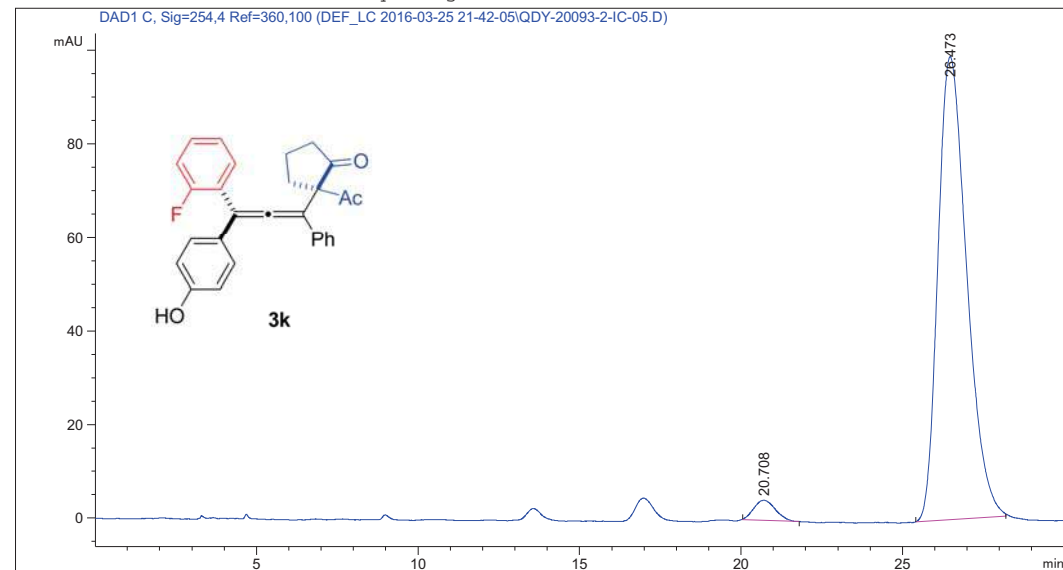

```

=====
Area Percent Report
=====
  
```

```

Sorted By      :      Signal
Multiplier     :      1.0000
Dilution       :      1.0000
Use Multiplier & Dilution Factor with ISTDs
  
```

Signal 1: DAD1 C, Sig=254,4 Ref=360,100

| Peak # | RetTime [min] | Type | Width [min] | Area [mAU*s] | Height [mAU] | Area %  |
|--------|---------------|------|-------------|--------------|--------------|---------|
| 1      | 20.708        | BB   | 0.5561      | 198.82310    | 4.29505      | 3.1520  |
| 2      | 26.473        | BB   | 0.9478      | 6108.96680   | 99.00853     | 96.8480 |

Totals :                                    6307.78990    103.30358

## Supplementary Figure 181. HPLC spectrum for 3k

Sample Name:

```

=====
Acq. Operator   :                               Seq. Line :   11
Acq. Instrument : Instrument 1                   Location  : Vial 34
Injection Date  : 1/6/2016 1:13:34 PM           Inj       :    1
                                                    Inj Volume: 5.000 µl

Acq. Method     : C:\CHEM32\1\DATA\DEF_LC 2016-01-06 10-08-49\AD-10-30-0.5.M
Last changed    : 1/6/2016 1:12:39 PM
                (modified after loading)
Analysis Method : C:\CHEM32\1\METHODS\IC-15-30.M
Last changed    : 8/20/2016 4:08:47 PM
                (modified after loading)
Additional Info  : Peak(s) manually integrated
    
```

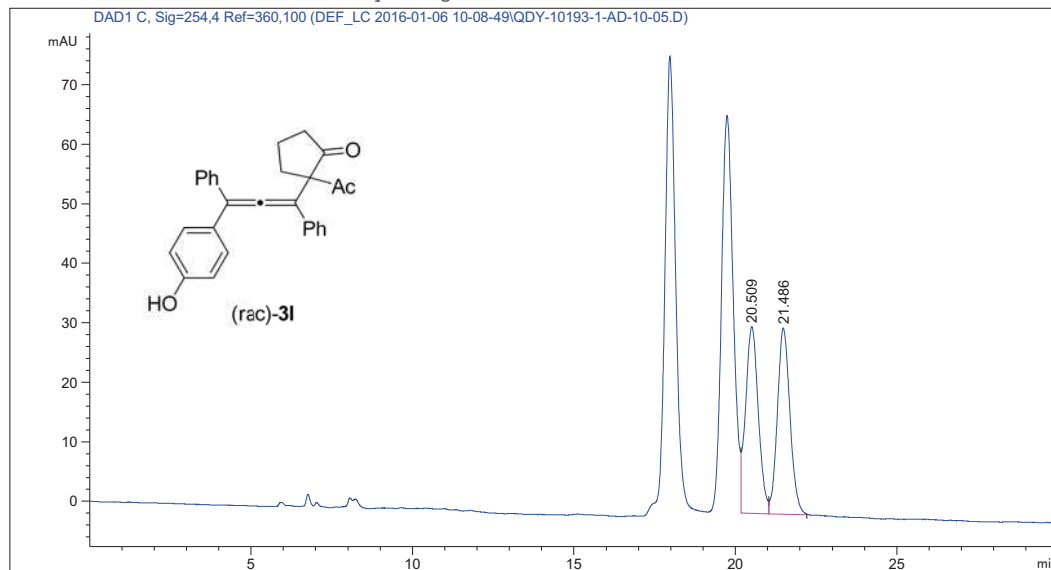

Area Percent Report

```

Sorted By      :      Signal
Multiplier     :      1.0000
Dilution       :      1.0000
Use Multiplier & Dilution Factor with ISTDs
    
```

Signal 1: DAD1 C, Sig=254,4 Ref=360,100

| Peak # | RetTime [min] | Type | Width [min] | Area [mAU*s] | Height [mAU] | Area %  |
|--------|---------------|------|-------------|--------------|--------------|---------|
| 1      | 20.509        | VV   | 0.4218      | 864.40710    | 31.34101     | 50.3231 |
| 2      | 21.486        | VB   | 0.4203      | 853.30853    | 31.28021     | 49.6769 |

Totals : 1717.71564 62.62122

Sample Name:

```

=====
Acq. Operator   :                               Seq. Line :    2
Acq. Instrument : Instrument 1                   Location  : Vial 31
Injection Date   : 6/3/2016 11:54:26 PM         Inj       :    1
                                                    Inj Volume: 5.000 µl

Acq. Method     : C:\CHEM32\1\DATA\QDY 2016-06-03 23-40-32\AD-10-30-0.5.M
Last changed    : 6/3/2016 11:53:33 PM
                (modified after loading)
Analysis Method : C:\CHEM32\1\METHODS\IC-15-30.M
Last changed    : 8/20/2016 4:08:47 PM
                (modified after loading)
Additional Info  : Peak(s) manually integrated
    
```

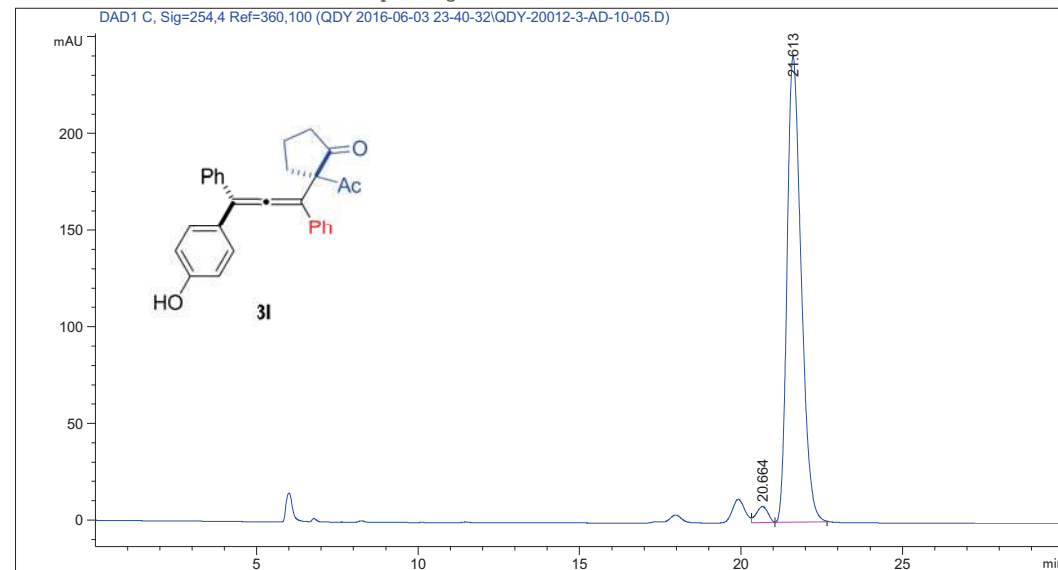

Area Percent Report

```

Sorted By      :      Signal
Multiplier     :      1.0000
Dilution       :      1.0000
Use Multiplier & Dilution Factor with ISTDs
    
```

Signal 1: DAD1 C, Sig=254,4 Ref=360,100

| Peak # | RetTime [min] | Type | Width [min] | Area [mAU*s] | Height [mAU] | Area %  |
|--------|---------------|------|-------------|--------------|--------------|---------|
| 1      | 20.664        | VV   | 0.3936      | 206.00653    | 8.29917      | 2.7387  |
| 2      | 21.613        | VB   | 0.4703      | 7315.97168   | 240.87839    | 97.2613 |

Totals : 7521.97821 249.17756

**Supplementary Figure 182. HPLC spectrum for 3I**



Sample Name:

```

=====
Acq. Operator   :                               Seq. Line :   31
Acq. Instrument : Instrument 1                 Location  : Vial 33
Injection Date  : 1/22/2016 7:46:01 PM        Inj       :    1
                                                Inj Volume: 5.000 µl

Acq. Method    : C:\CHEM32\1\DATA\DEF_LC 2016-01-22 10-07-33\AD-10-30-0.5.M
Last changed   : 1/7/2016 11:07:32 PM
Analysis Method: C:\CHEM32\1\METHODS\AD-01-10-2.0.M
Last changed   : 6/26/2016 2:13:09 PM
                (modified after loading)
Additional Info : Peak(s) manually integrated
  
```

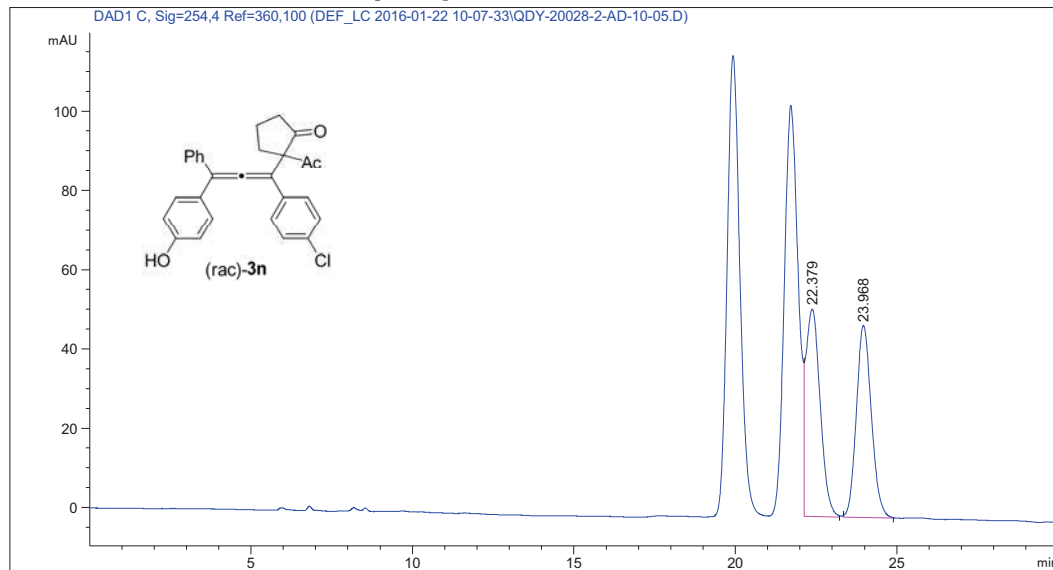

## Area Percent Report

```

Sorted By      :      Signal
Multiplier     :      1.0000
Dilution      :      1.0000
Use Multiplier & Dilution Factor with ISTDs
  
```

Signal 1: DAD1 C, Sig=254,4 Ref=360,100

| Peak # | RetTime [min] | Type | Width [min] | Area [mAU*s] | Height [mAU] | Area %  |
|--------|---------------|------|-------------|--------------|--------------|---------|
| 1      | 22.379        | VB   | 0.4605      | 1617.20544   | 52.33952     | 50.8224 |
| 2      | 23.968        | BB   | 0.5012      | 1564.86450   | 48.39814     | 49.1776 |

Totals : 3182.06995 100.73766

Sample Name:

```

=====
Acq. Operator   :                               Seq. Line :    2
Acq. Instrument : Instrument 1                 Location  : Vial 31
Injection Date  : 1/28/2016 6:22:19 PM        Inj       :    1
                                                Inj Volume: 5.000 µl

Acq. Method    : C:\CHEM32\1\DATA\DEF_LC 2016-01-28 18-11-20\AD-10-30-0.5.M
Last changed   : 1/28/2016 6:22:31 PM
                (modified after loading)
Analysis Method: C:\CHEM32\1\METHODS\AD-01-10-2.0.M
Last changed   : 6/26/2016 2:13:09 PM
                (modified after loading)
Additional Info : Peak(s) manually integrated
  
```

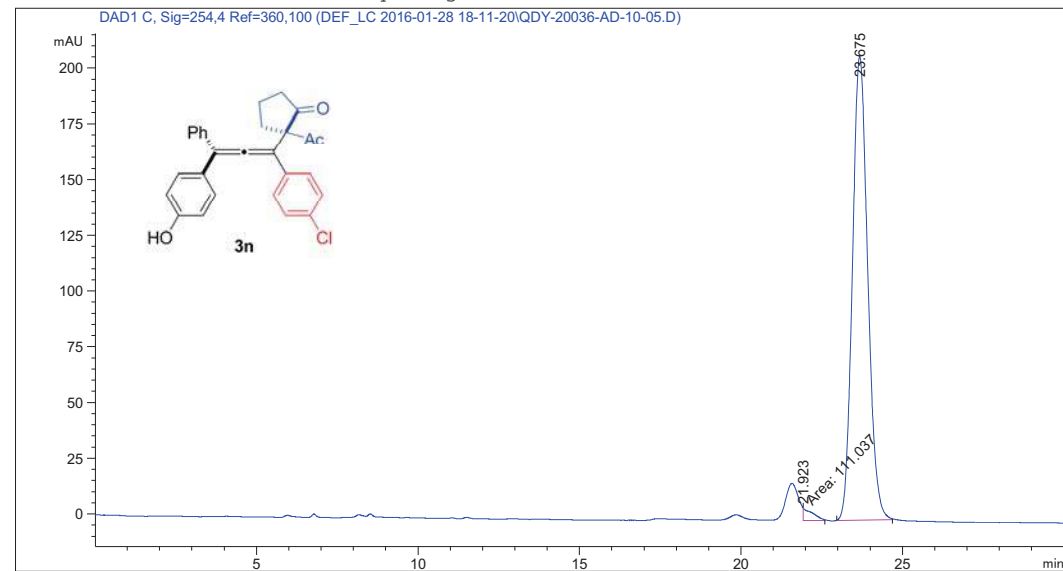

## Area Percent Report

```

Sorted By      :      Signal
Multiplier     :      1.0000
Dilution      :      1.0000
Use Multiplier & Dilution Factor with ISTDs
  
```

Signal 1: DAD1 C, Sig=254,4 Ref=360,100

| Peak # | RetTime [min] | Type | Width [min] | Area [mAU*s] | Height [mAU] | Area %  |
|--------|---------------|------|-------------|--------------|--------------|---------|
| 1      | 21.923        | FM   | 0.3323      | 111.03651    | 5.56921      | 1.5975  |
| 2      | 23.675        | BB   | 0.5077      | 6839.57959   | 207.98744    | 98.4025 |

Totals : 6950.61610 213.55665

## Supplementary Figure 184. HPLC spectrum for 3n

Sample Name:

```

=====
Acq. Operator   :                               Seq. Line :   29
Acq. Instrument : Instrument 1                   Location  : Vial 31
Injection Date  : 4/8/2016 9:11:23 AM           Inj       :    1
                                                    Inj Volume: 5.000 µl

Acq. Method    : C:\CHEM32\1\DATA\DEF_LC 2016-04-07 21-02-15\AD-10-30-0.5.M
Last changed   : 1/7/2016 11:07:32 PM
Analysis Method: C:\CHEM32\1\METHODS\AD-01-10-2.0.M
Last changed   : 6/26/2016 2:13:09 PM
                (modified after loading)
    
```

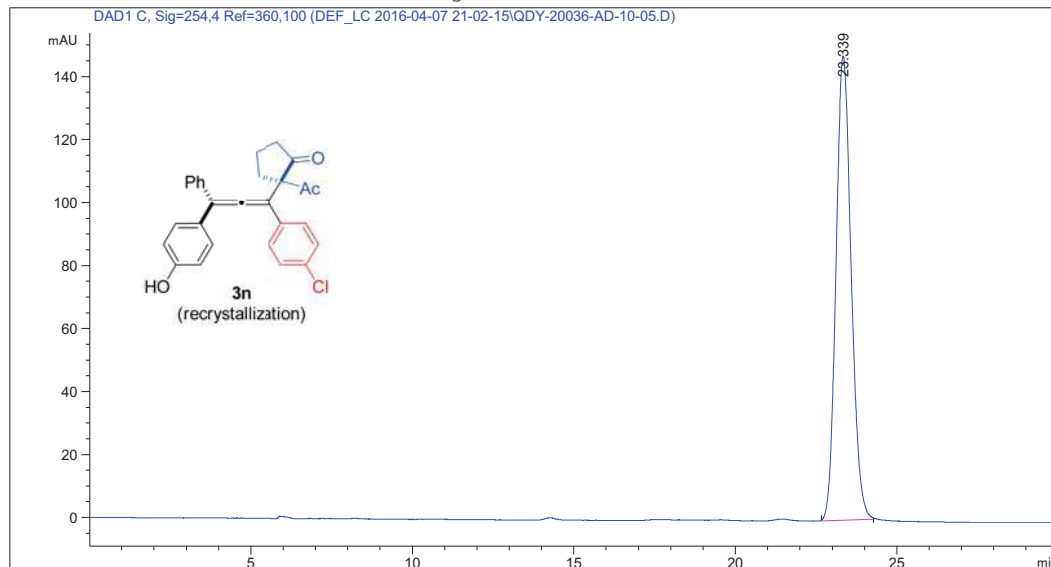

Area Percent Report

```

Sorted By      :      Signal
Multiplier     :      1.0000
Dilution       :      1.0000
Use Multiplier & Dilution Factor with ISTDs
    
```

Signal 1: DAD1 C, Sig=254,4 Ref=360,100

| Peak # | RetTime [min] | Type | Width [min] | Area [mAU*s] | Height [mAU] | Area %   |
|--------|---------------|------|-------------|--------------|--------------|----------|
| 1      | 23.339        | BB   | 0.5087      | 4807.56592   | 147.34752    | 100.0000 |

Totals : 4807.56592 147.34752

\*\*\* End of Report \*\*\*

**Supplementary Figure 185. HPLC spectrum for 3n'**

Sample Name:

```

=====
Acq. Operator   :                               Seq. Line :   13
Acq. Instrument : Instrument 1                   Location  : Vial 32
Injection Date  : 3/17/2016 5:12:23 PM          Inj       :    1
                                                    Inj Volume: 5.000 µl

Acq. Method    : C:\CHEM32\1\DATA\DEF_LC 2016-03-17 13-35-36\AD-10-30.M
Last changed   : 11/30/2015 12:57:24 PM
Analysis Method: C:\CHEM32\1\METHODS\IC-15-30.M
Last changed   : 8/20/2016 4:26:25 PM
                (modified after loading)
Additional Info: Peak(s) manually integrated
  
```

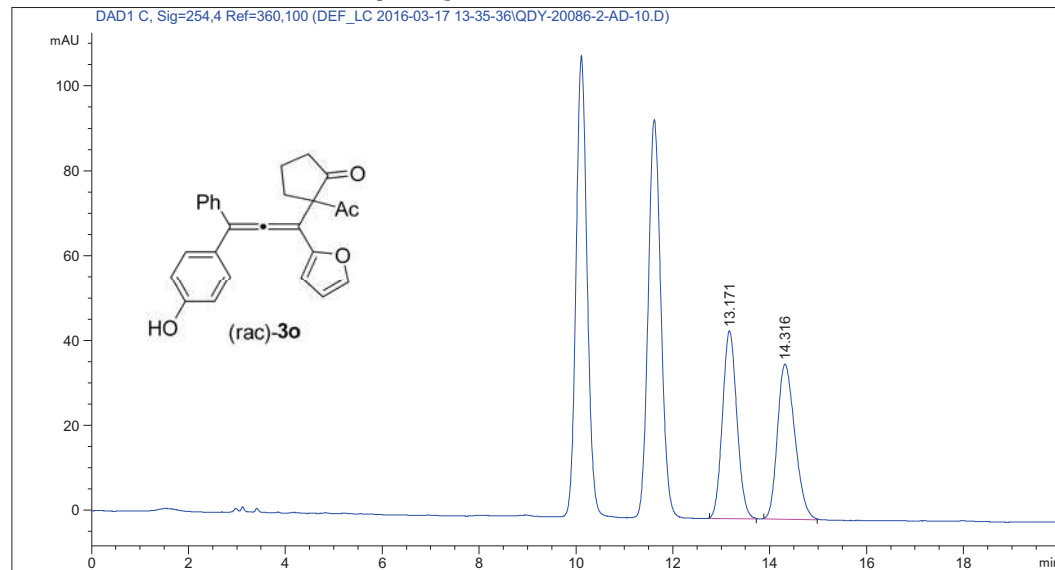

## Area Percent Report

```

=====
Sorted By      :      Signal
Multiplier     :      1.0000
Dilution      :      1.0000
Use Multiplier & Dilution Factor with ISTDs
  
```

Signal 1: DAD1 C, Sig=254,4 Ref=360,100

| Peak # | RetTime [min] | Type | Width [min] | Area [mAU*s] | Height [mAU] | Area %  |
|--------|---------------|------|-------------|--------------|--------------|---------|
| 1      | 13.171        | BB   | 0.3233      | 915.31964    | 44.26314     | 50.0637 |
| 2      | 14.316        | BB   | 0.3834      | 912.99078    | 36.54956     | 49.9363 |

Totals : 1828.31042 80.81270

Sample Name:

```

=====
Acq. Operator   :                               Seq. Line :   70
Acq. Instrument : Instrument 1                   Location  : Vial 32
Injection Date  : 3/18/2016 4:46:31 PM          Inj       :    1
                                                    Inj Volume: 5.000 µl

Acq. Method    : C:\CHEM32\1\DATA\DEF_LC 2016-03-17 13-35-36\AD-10-20.M
Last changed   : 11/28/2014 10:15:17 AM
Analysis Method: C:\CHEM32\1\METHODS\IC-15-30.M
Last changed   : 8/20/2016 4:08:47 PM
                (modified after loading)
Additional Info: Peak(s) manually integrated
  
```

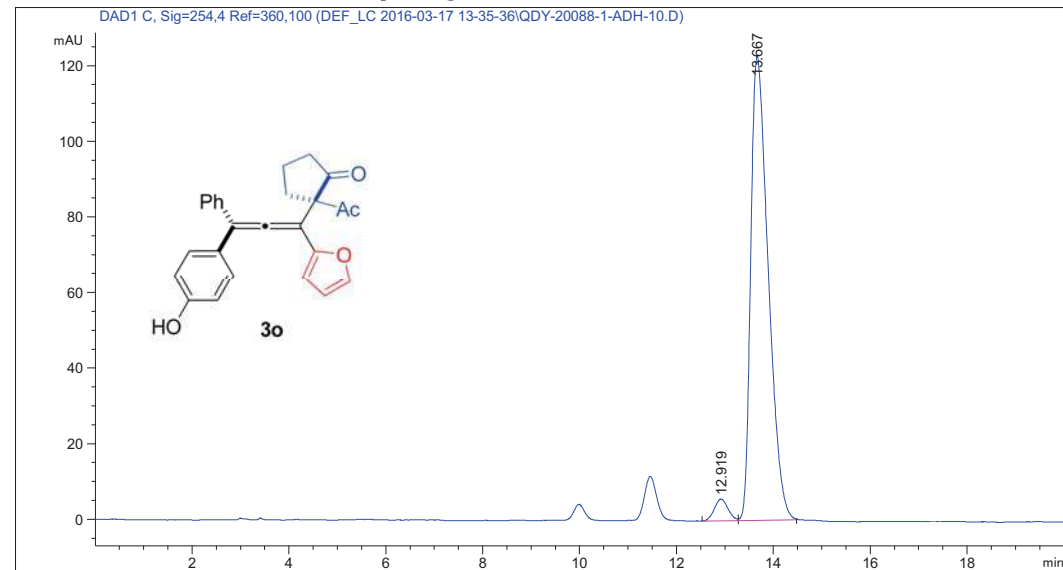

## Area Percent Report

```

=====
Sorted By      :      Signal
Multiplier     :      1.0000
Dilution      :      1.0000
Use Multiplier & Dilution Factor with ISTDs
  
```

Signal 1: DAD1 C, Sig=254,4 Ref=360,100

| Peak # | RetTime [min] | Type | Width [min] | Area [mAU*s] | Height [mAU] | Area %  |
|--------|---------------|------|-------------|--------------|--------------|---------|
| 1      | 12.919        | BV   | 0.3037      | 111.90915    | 5.73329      | 3.5141  |
| 2      | 13.667        | VB   | 0.3818      | 3072.70459   | 122.87263    | 96.4859 |

Totals : 3184.61374 128.60593

## Supplementary Figure 186. HPLC spectrum for 3o

Sample Name:

```

=====
Acq. Operator   :                               Seq. Line :   16
Acq. Instrument : Instrument 1                   Location  : Vial 31
Injection Date  : 3/17/2016 6:19:13 PM          Inj       :    1
                                                    Inj Volume: 5.000 µl

Acq. Method    : C:\CHEM32\1\DATA\DEF_LC 2016-03-17 13-35-36\AD-10-30.M
Last changed   : 11/30/2015 12:57:24 PM
Analysis Method: C:\CHEM32\1\METHODS\IC-15-30.M
Last changed   : 8/20/2016 4:26:25 PM
                (modified after loading)
Additional Info : Peak(s) manually integrated
  
```

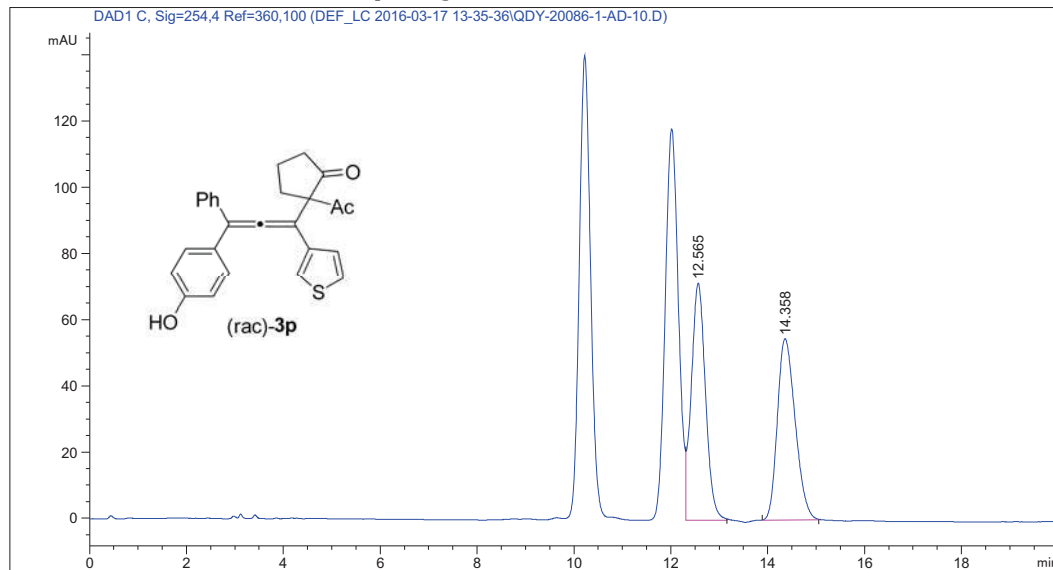

```

=====
Area Percent Report
=====
  
```

```

Sorted By      :      Signal
Multiplier     :      1.0000
Dilution       :      1.0000
Use Multiplier & Dilution Factor with ISTDs
  
```

Signal 1: DAD1 C, Sig=254,4 Ref=360,100

| Peak # | RetTime [min] | Type | Width [min] | Area [mAU*s] | Height [mAU] | Area %  |
|--------|---------------|------|-------------|--------------|--------------|---------|
| 1      | 12.565        | VB   | 0.3114      | 1455.71436   | 71.54522     | 50.8861 |
| 2      | 14.358        | BB   | 0.4009      | 1405.01794   | 54.84630     | 49.1139 |

Totals :                    2860.73230    126.39152

### Supplementary Figure 187. HPLC spectrum for 3p

Sample Name:

```

=====
Acq. Operator   :                               Seq. Line :    9
Acq. Instrument : Instrument 1                   Location  : Vial 32
Injection Date  : 3/24/2016 12:34:12 PM          Inj       :    1
                                                    Inj Volume: 5.000 µl

Acq. Method    : C:\CHEM32\1\DATA\DEF_LC 2016-03-24 10-24-21\AD-10-30.M
Last changed   : 3/24/2016 12:40:12 PM
                (modified after loading)
Analysis Method: C:\CHEM32\1\METHODS\IC-15-30.M
Last changed   : 8/20/2016 4:26:25 PM
                (modified after loading)
Additional Info : Peak(s) manually integrated
  
```

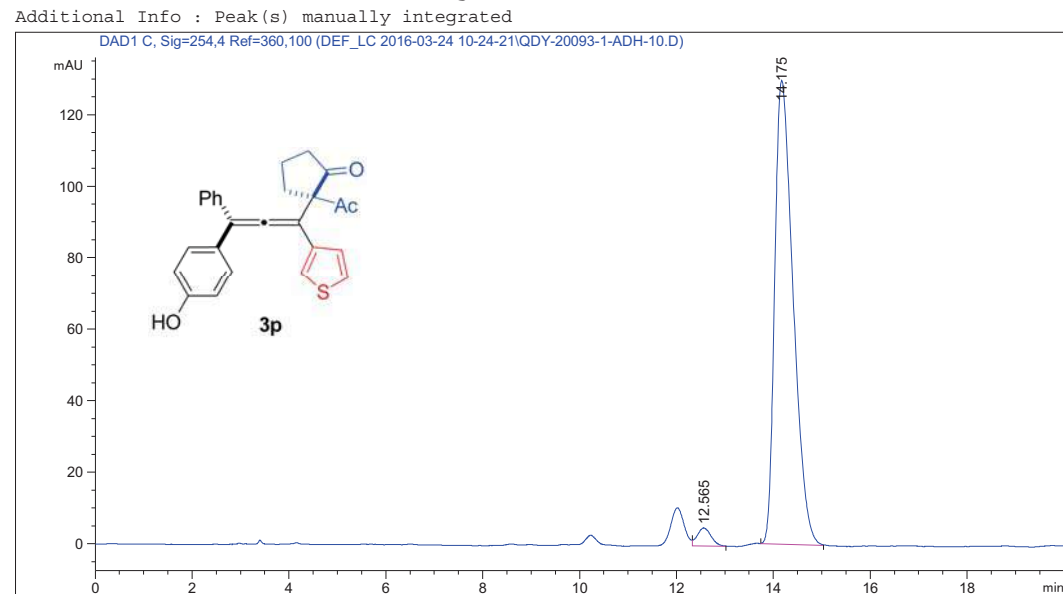

```

=====
Area Percent Report
=====
  
```

```

Sorted By      :      Signal
Multiplier     :      1.0000
Dilution       :      1.0000
Use Multiplier & Dilution Factor with ISTDs
  
```

Signal 1: DAD1 C, Sig=254,4 Ref=360,100

| Peak # | RetTime [min] | Type | Width [min] | Area [mAU*s] | Height [mAU] | Area %  |
|--------|---------------|------|-------------|--------------|--------------|---------|
| 1      | 12.565        | VB   | 0.3027      | 102.38339    | 5.08985      | 2.9131  |
| 2      | 14.175        | BB   | 0.4070      | 3412.21973   | 129.67111    | 97.0869 |

Totals :                    3514.60312    134.76096



Sample Name:

```

=====
Acq. Operator   :                               Seq. Line :   14
Acq. Instrument : Instrument 1                 Location  : Vial 31
Injection Date  : 1/15/2016 7:04:56 PM       Inj       :    1
                                                Inj Volume: 5.000 µl

Acq. Method    : C:\CHEM32\1\DATA\DEF_LC 2016-01-15 14-48-07\AD-15-30.M
Last changed   : 1/15/2016 7:21:04 PM
                (modified after loading)
Analysis Method: C:\CHEM32\1\METHODS\AD-01-10-2.0.M
Last changed   : 6/25/2016 10:45:20 PM
Additional Info : Peak(s) manually integrated
  
```

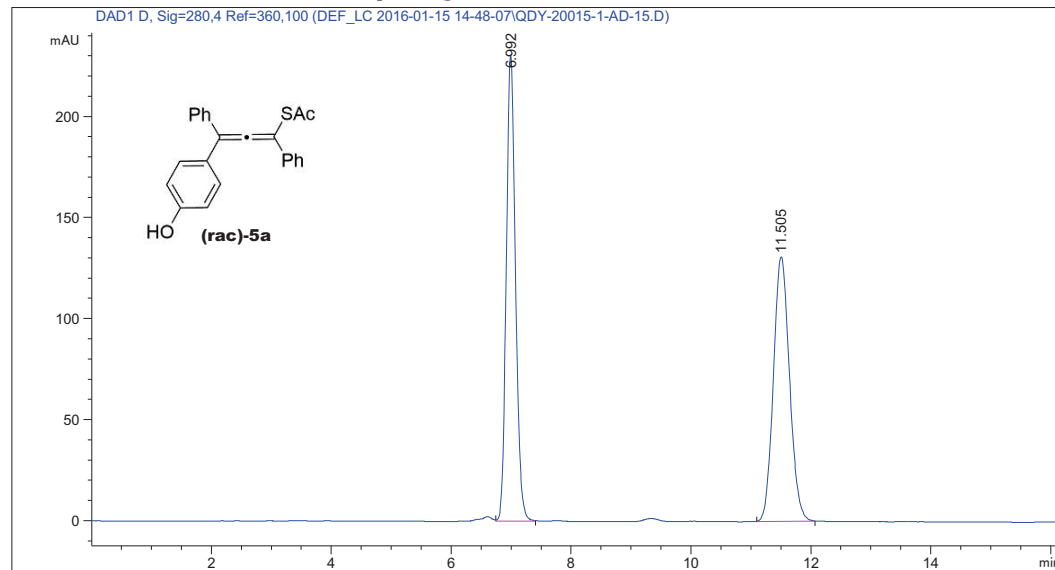

```

=====
Area Percent Report
=====
  
```

```

Sorted By      :      Signal
Multiplier     :      1.0000
Dilution       :      1.0000
Use Multiplier & Dilution Factor with ISTDs
  
```

Signal 1: DAD1 D, Sig=280,4 Ref=360,100

| Peak # | RetTime [min] | Type | Width [min] | Area [mAU*s] | Height [mAU] | Area %  |
|--------|---------------|------|-------------|--------------|--------------|---------|
| 1      | 6.992         | VB   | 0.1642      | 2452.11304   | 230.39255    | 50.0793 |
| 2      | 11.505        | BB   | 0.2897      | 2444.35181   | 130.97171    | 49.9207 |

Totals :                    4896.46484    361.36426

Sample Name:

```

=====
Acq. Operator   :                               Seq. Line :   72
Acq. Instrument : Instrument 1                 Location  : Vial 39
Injection Date  : 3/18/2016 5:15:48 PM       Inj       :    1
                                                Inj Volume: 5.000 µl

Acq. Method    : C:\CHEM32\1\DATA\DEF_LC 2016-03-17 13-35-36\AD-15-22.M
Last changed   : 9/15/2015 8:34:07 PM
Analysis Method: C:\CHEM32\1\METHODS\AD-3030.M
Last changed   : 6/15/2016 2:43:08 PM
                (modified after loading)
Additional Info : Peak(s) manually integrated
  
```

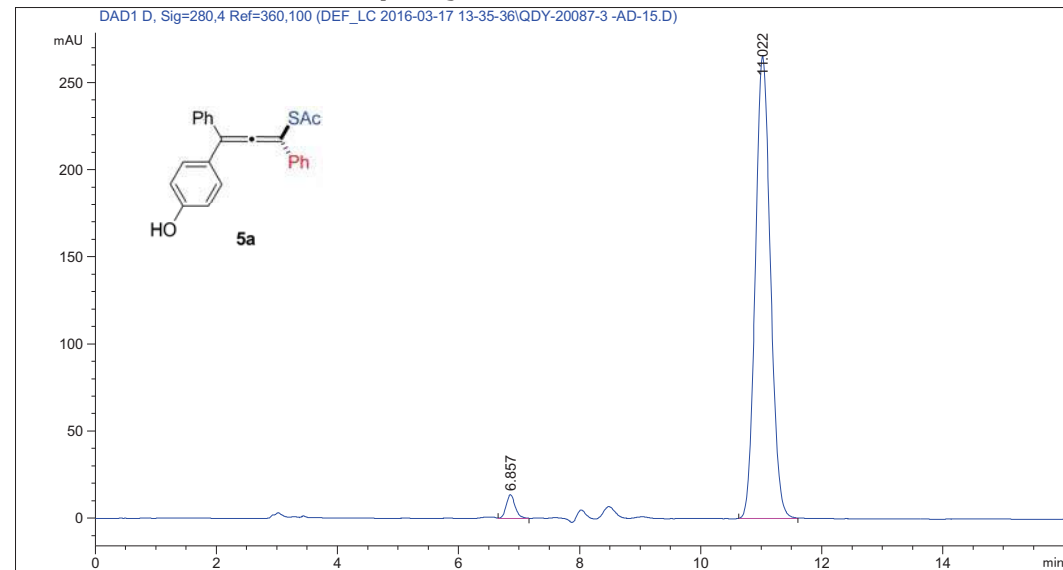

```

=====
Area Percent Report
=====
  
```

```

Sorted By      :      Signal
Multiplier     :      1.0000
Dilution       :      1.0000
Use Multiplier & Dilution Factor with ISTDs
  
```

Signal 1: DAD1 D, Sig=280,4 Ref=360,100

| Peak # | RetTime [min] | Type | Width [min] | Area [mAU*s] | Height [mAU] | Area %  |
|--------|---------------|------|-------------|--------------|--------------|---------|
| 1      | 6.857         | VB   | 0.1572      | 138.61012    | 13.56842     | 2.9376  |
| 2      | 11.022        | BB   | 0.2691      | 4579.83252   | 265.64444    | 97.0624 |

Totals :                    4718.44264    279.21286

```

=====
Supplementary Figure 188. HPLC spectrum for 5a
=====
  
```

Sample Name:

```

=====
Acq. Operator   :                               Seq. Line : 17
Acq. Instrument : Instrument 1                 Location  : Vial 33
Injection Date  : 3/29/2016 4:38:58 PM        Inj       : 1
                                                Inj Volume: 5.000 µl

Acq. Method    : C:\CHEM32\1\DATA\DEF_LC 2016-03-29 10-50-03\AD-20-30.M
Last changed   : 9/14/2015 3:31:48 PM
Analysis Method: C:\CHEM32\1\METHODS\AD-01-10-2.0.M
Last changed   : 6/26/2016 9:16:02 PM
                (modified after loading)
Additional Info : Peak(s) manually integrated
  
```

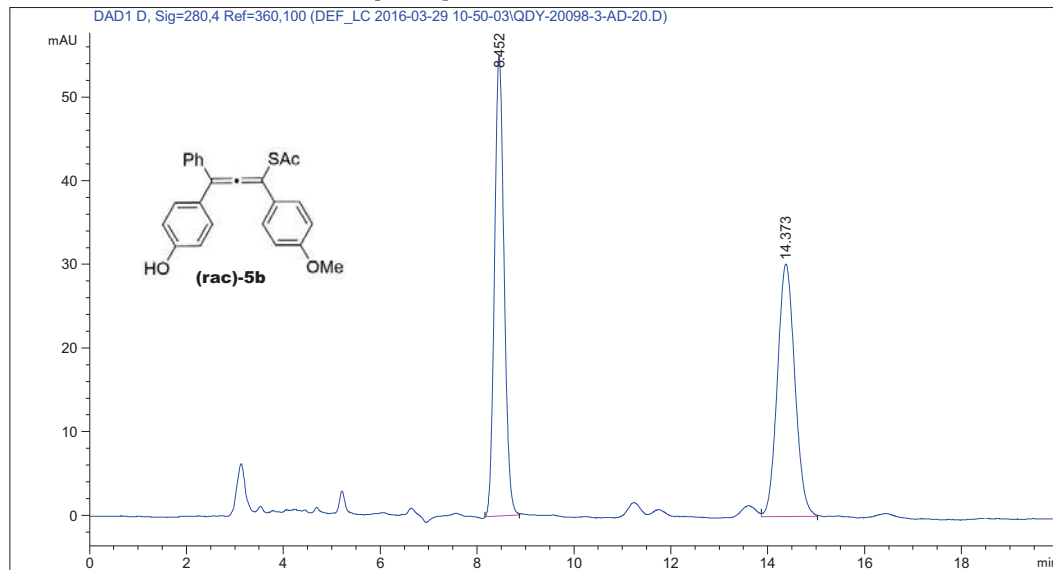

```

=====
Area Percent Report
=====
  
```

```

Sorted By      :      Signal
Multiplier     :      1.0000
Dilution      :      1.0000
Use Multiplier & Dilution Factor with ISTDs
  
```

Signal 1: DAD1 D, Sig=280,4 Ref=360,100

| Peak # | RetTime [min] | Type | Width [min] | Area [mAU*s] | Height [mAU] | Area %  |
|--------|---------------|------|-------------|--------------|--------------|---------|
| 1      | 8.452         | BB   | 0.2145      | 756.95715    | 55.01791     | 50.0821 |
| 2      | 14.373        | VB   | 0.3875      | 754.47668    | 30.19891     | 49.9179 |

Totals :                                    1511.43384    85.21682

## Supplementary Figure 189. HPLC spectrum for 5b

Sample Name:

```

=====
Acq. Operator   :                               Seq. Line : 12
Acq. Instrument : Instrument 1                 Location  : Vial 35
Injection Date  : 4/29/2016 10:34:54 PM        Inj       : 1
                                                Inj Volume: 5.000 µl

Acq. Method    : C:\CHEM32\1\DATA\DEF_LC 2016-04-29 18-48-49\AD-20-20.M
Last changed   : 4/29/2016 10:34:02 PM
                (modified after loading)
Analysis Method: C:\CHEM32\1\METHODS\AD-01-10-2.0.M
Last changed   : 6/26/2016 9:13:23 PM
                (modified after loading)
Additional Info : Peak(s) manually integrated
  
```

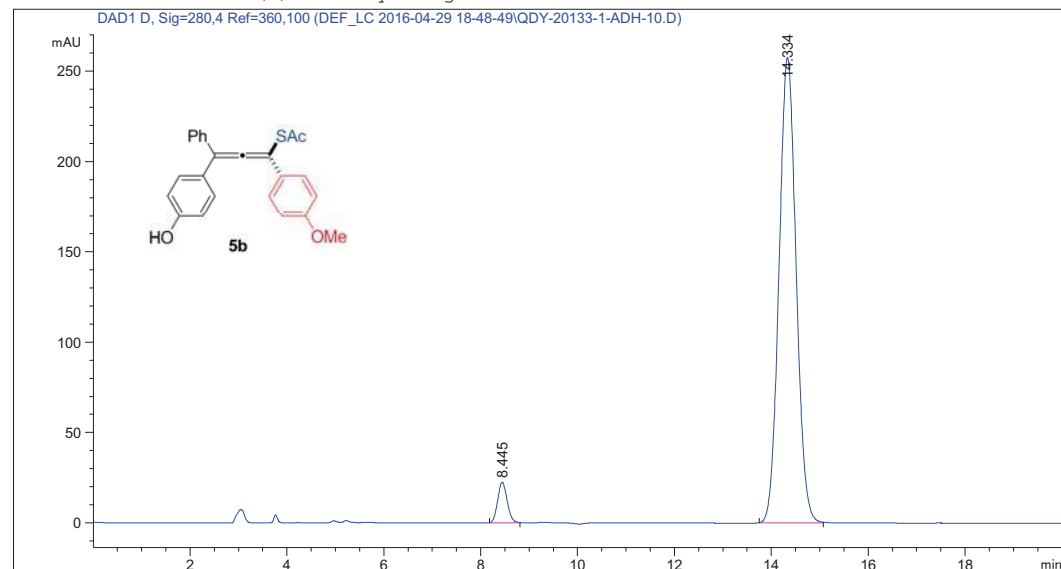

```

=====
Area Percent Report
=====
  
```

```

Sorted By      :      Signal
Multiplier     :      1.0000
Dilution      :      1.0000
Use Multiplier & Dilution Factor with ISTDs
  
```

Signal 1: DAD1 D, Sig=280,4 Ref=360,100

| Peak # | RetTime [min] | Type | Width [min] | Area [mAU*s] | Height [mAU] | Area %  |
|--------|---------------|------|-------------|--------------|--------------|---------|
| 1      | 8.445         | BB   | 0.2113      | 307.34174    | 22.50527     | 4.6406  |
| 2      | 14.334        | BB   | 0.3800      | 6315.47900   | 257.61475    | 95.3594 |

Totals :                                    6622.82074    280.12002

Sample Name:

```

=====
Acq. Operator   :                               Seq. Line :   33
Acq. Instrument : Instrument 1                  Location  : Vial 31
Injection Date  : 5/9/2016 12:25:00 AM         Inj       :    1
                                                Inj Volume: 5.000 µl

Acq. Method    : C:\CHEM32\1\DATA\DEF_LC 2016-05-08 12-45-48\AD-15-22.M
Last changed   : 9/15/2015 8:34:07 PM
Analysis Method: C:\CHEM32\1\METHODS\AD-01-10-2.0.M
Last changed   : 6/26/2016 8:57:24 PM
                (modified after loading)
Additional Info: Peak(s) manually integrated
    
```

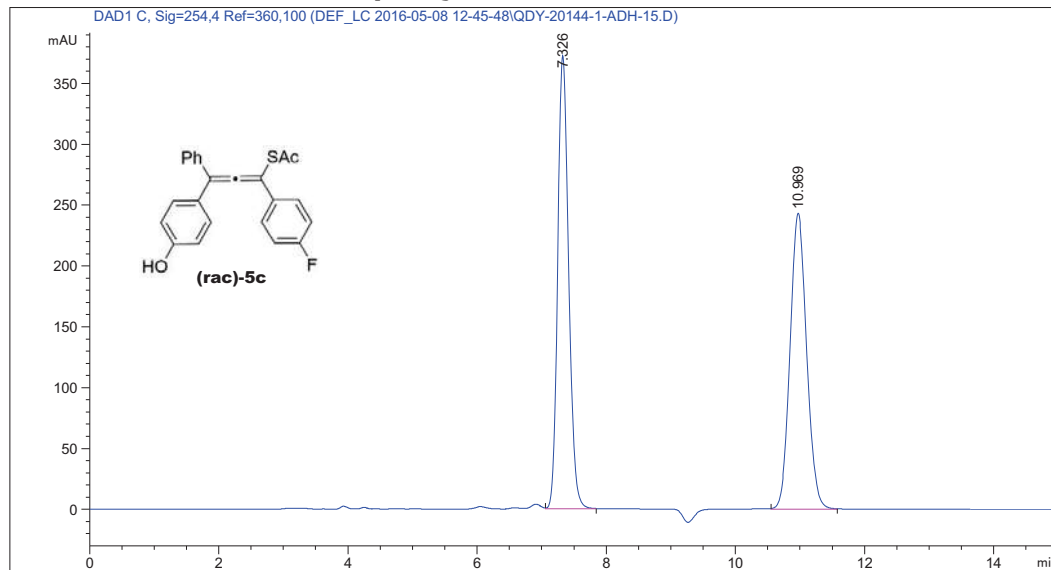

Area Percent Report

```

=====
Sorted By      :      Signal
Multiplier     :      1.0000
Dilution       :      1.0000
Use Multiplier & Dilution Factor with ISTDs
    
```

Signal 1: DAD1 C, Sig=254,4 Ref=360,100

| Peak #   | RetTime [min] | Type | Width [min] | Area [mAU*s] | Height [mAU] | Area %  |
|----------|---------------|------|-------------|--------------|--------------|---------|
| 1        | 7.326         | VB   | 0.1828      | 4366.85938   | 372.40533    | 50.2199 |
| 2        | 10.969        | BB   | 0.2757      | 4328.62256   | 243.13440    | 49.7801 |
| Totals : |               |      |             | 8695.48193   | 615.53973    |         |

**Supplementary Figure 190. HPLC spectrum for 5c**

Sample Name:

```

=====
Acq. Operator   :                               Seq. Line :   21
Acq. Instrument : Instrument 1                  Location  : Vial 33
Injection Date  : 5/10/2016 6:18:08 PM         Inj       :    1
                                                Inj Volume: 5.000 µl

Different Inj Volume from Sequence ! Actual Inj Volume : 1.000 µl
Acq. Method    : C:\CHEM32\1\DATA\DEF_LC 2016-05-10 10-25-50\AD-15-22.M
Last changed   : 5/10/2016 6:24:54 PM
                (modified after loading)
Analysis Method: C:\CHEM32\1\METHODS\AD-01-10-2.0.M
Last changed   : 6/26/2016 8:55:19 PM
                (modified after loading)
Additional Info: Peak(s) manually integrated
    
```

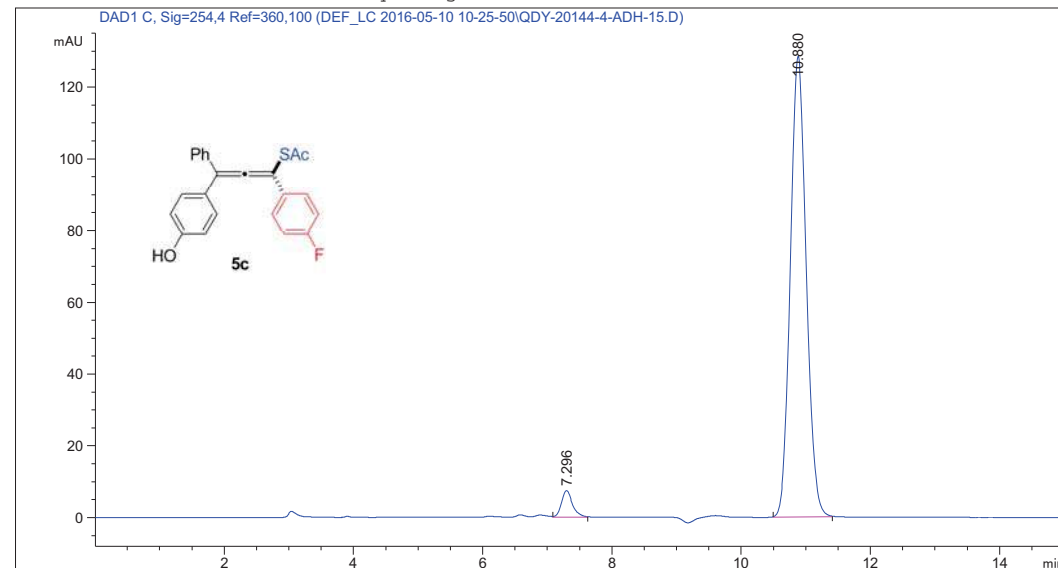

Area Percent Report

```

=====
Sorted By      :      Signal
Multiplier     :      1.0000
Dilution       :      1.0000
Use Multiplier & Dilution Factor with ISTDs
    
```

Signal 1: DAD1 C, Sig=254,4 Ref=360,100

| Peak #   | RetTime [min] | Type | Width [min] | Area [mAU*s] | Height [mAU] | Area %  |
|----------|---------------|------|-------------|--------------|--------------|---------|
| 1        | 7.296         | BB   | 0.1765      | 87.03292     | 7.43725      | 3.8065  |
| 2        | 10.880        | BB   | 0.2657      | 2199.37378   | 128.49953    | 96.1935 |
| Totals : |               |      |             | 2286.40670   | 135.93677    |         |

Sample Name:

```

=====
Acq. Operator   :                               Seq. Line :   18
Acq. Instrument : Instrument 1                   Location  : Vial 31
Injection Date  : 4/30/2016 12:42:59 AM         Inj       :    1
                                                Inj Volume: 5.000 µl

Acq. Method    : C:\CHEM32\1\DATA\DEF_LC 2016-04-29 18-48-49\AD-15-30.M
Last changed   : 4/30/2016 1:07:01 AM
                (modified after loading)
Analysis Method: C:\CHEM32\1\METHODS\AD-01-10-2.0.M
Last changed   : 6/26/2016 9:00:17 PM
                (modified after loading)
Additional Info : Peak(s) manually integrated
  
```

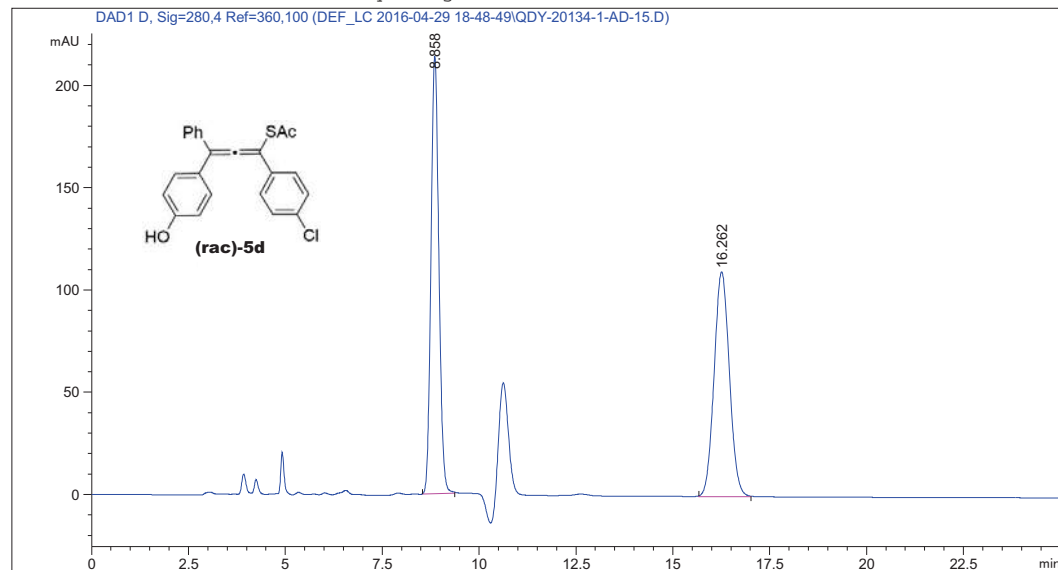

```

=====
Area Percent Report
=====
  
```

```

Sorted By      :      Signal
Multiplier     :      1.0000
Dilution       :      1.0000
Use Multiplier & Dilution Factor with ISTDs
  
```

Signal 1: DAD1 D, Sig=280,4 Ref=360,100

| Peak # | RetTime [min] | Type | Width [min] | Area [mAU*s] | Height [mAU] | Area %  |
|--------|---------------|------|-------------|--------------|--------------|---------|
| 1      | 8.858         | BB   | 0.2209      | 3023.58618   | 213.92877    | 50.0682 |
| 2      | 16.262        | BB   | 0.4280      | 3015.34619   | 109.93711    | 49.9318 |

Totals :                    6038.93237    323.86588

### Supplementary Figure 191. HPLC spectrum for 5d

Sample Name:

```

=====
Acq. Operator   :                               Seq. Line :   10
Acq. Instrument : Instrument 1                   Location  : Vial 31
Injection Date  : 5/12/2016 11:40:46 AM         Inj       :    1
                                                Inj Volume: 5.000 µl

Acq. Method    : C:\CHEM32\1\DATA\DEF_LC 2016-05-12 09-09-58\AD-15-30.M
Last changed   : 5/12/2016 11:39:53 AM
                (modified after loading)
Analysis Method: C:\CHEM32\1\METHODS\AD-01-10-2.0.M
Last changed   : 6/26/2016 9:00:17 PM
                (modified after loading)
Additional Info : Peak(s) manually integrated
  
```

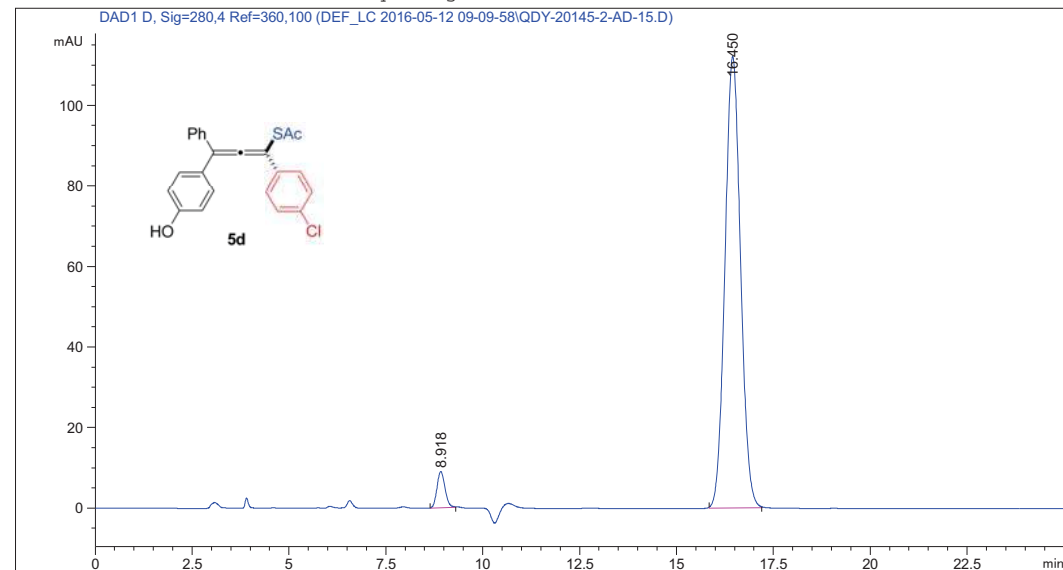

```

=====
Area Percent Report
=====
  
```

```

Sorted By      :      Signal
Multiplier     :      1.0000
Dilution       :      1.0000
Use Multiplier & Dilution Factor with ISTDs
  
```

Signal 1: DAD1 D, Sig=280,4 Ref=360,100

| Peak # | RetTime [min] | Type | Width [min] | Area [mAU*s] | Height [mAU] | Area %  |
|--------|---------------|------|-------------|--------------|--------------|---------|
| 1      | 8.918         | BB   | 0.2243      | 130.28934    | 9.02971      | 4.0040  |
| 2      | 16.450        | BB   | 0.4331      | 3123.68799   | 112.10854    | 95.9960 |

Totals :                    3253.97733    121.13826

Sample Name:

```

=====
Acq. Operator   :                               Seq. Line :   16
Acq. Instrument : Instrument 1                 Location  : Vial 33
Injection Date  : 3/5/2016 7:28:45 PM         Inj       :    1
                                                Inj Volume: 5.000 µl

Acq. Method    : C:\CHEM32\1\DATA\DEF_LC 2016-03-05 14-20-31\AD-10-20.M
Last changed   : 3/5/2016 7:11:35 PM
                (modified after loading)
Analysis Method : C:\CHEM32\1\METHODS\AD-01-10-2.0.M
Last changed   : 6/26/2016 2:31:40 PM
                (modified after loading)
Additional Info : Peak(s) manually integrated
    
```

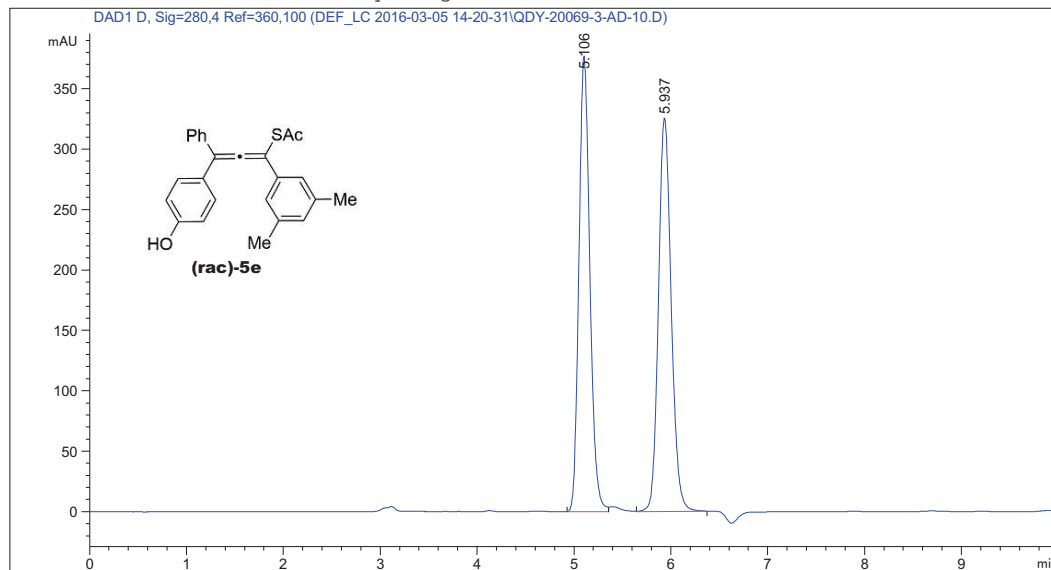

Area Percent Report

```

Sorted By      :      Signal
Multiplier     :      1.0000
Dilution       :      1.0000
Use Multiplier & Dilution Factor with ISTDs
    
```

Signal 1: DAD1 D, Sig=280,4 Ref=360,100

| Peak # | RetTime [min] | Type | Width [min] | Area [mAU*s] | Height [mAU] | Area %  |
|--------|---------------|------|-------------|--------------|--------------|---------|
| 1      | 5.106         | BV   | 0.1192      | 2947.91675   | 377.19528    | 49.7389 |
| 2      | 5.937         | VB   | 0.1407      | 2978.87012   | 325.63467    | 50.2611 |

Totals : 5926.78687 702.82996

Sample Name:

```

=====
Acq. Operator   :                               Seq. Line :   87
Acq. Instrument : Instrument 1                 Location  : Vial 31
Injection Date  : 5/11/2016 6:35:56 PM         Inj       :    1
                                                Inj Volume: 5.000 µl

Acq. Method    : C:\CHEM32\1\DATA\DEF_LC 2016-05-10 10-25-50\AD-10-20.M
Last changed   : 11/28/2014 10:15:17 AM
Analysis Method : C:\CHEM32\1\METHODS\AD-01-10-2.0.M
Last changed   : 6/26/2016 2:31:40 PM
                (modified after loading)
Additional Info : Peak(s) manually integrated
    
```

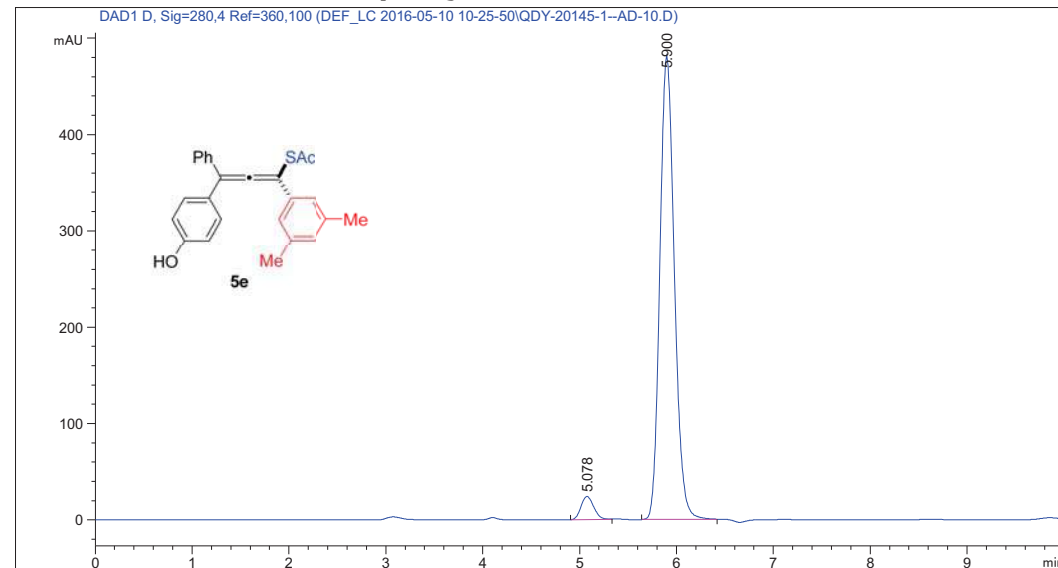

Area Percent Report

```

Sorted By      :      Signal
Multiplier     :      1.0000
Dilution       :      1.0000
Use Multiplier & Dilution Factor with ISTDs
    
```

Signal 1: DAD1 D, Sig=280,4 Ref=360,100

| Peak # | RetTime [min] | Type | Width [min] | Area [mAU*s] | Height [mAU] | Area %  |
|--------|---------------|------|-------------|--------------|--------------|---------|
| 1      | 5.078         | BB   | 0.1423      | 219.88640    | 24.14296     | 4.2105  |
| 2      | 5.900         | BB   | 0.1612      | 5002.39453   | 481.36807    | 95.7895 |

Totals : 5222.28093 505.51103

**Supplementary Figure 192. HPLC spectrum for 5e**

Sample Name:

```

=====
Acq. Operator   :                               Seq. Line :    2
Acq. Instrument : Instrument 1                 Location  : Vial 31
Injection Date  : 4/9/2016 10:24:09 AM        Inj       :    1
                                                Inj Volume: 5.000 µl

Acq. Method    : C:\CHEM32\1\DATA\DEF_LC 2016-04-09 10-10-22\AD-15-30.M
Last changed   : 4/9/2016 10:50:56 AM
                (modified after loading)
Analysis Method: C:\CHEM32\1\METHODS\AD-01-10-2.0.M
Last changed   : 6/26/2016 9:19:48 PM
                (modified after loading)
Additional Info : Peak(s) manually integrated
  
```

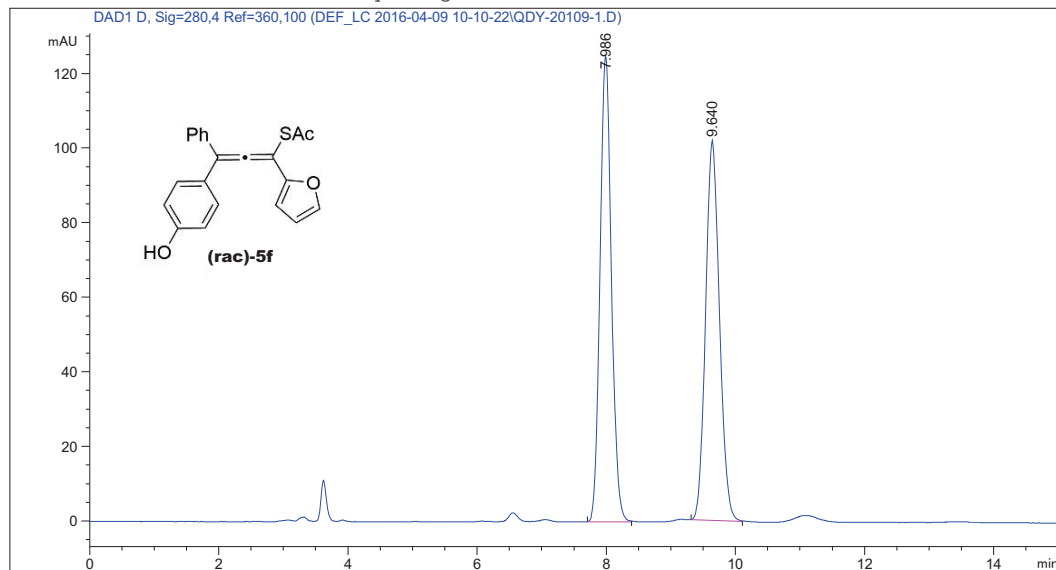

```

=====
Area Percent Report
=====
  
```

```

Sorted By      :      Signal
Multiplier     :      1.0000
Dilution      :      1.0000
Use Multiplier & Dilution Factor with ISTDs
  
```

Signal 1: DAD1 D, Sig=280,4 Ref=360,100

| Peak # | RetTime [min] | Type | Width [min] | Area [mAU*s] | Height [mAU] | Area %  |
|--------|---------------|------|-------------|--------------|--------------|---------|
| 1      | 7.986         | BB   | 0.1911      | 1530.46655   | 124.77222    | 50.0747 |
| 2      | 9.640         | BB   | 0.2329      | 1525.90210   | 101.77819    | 49.9253 |

Totals : 3056.36865 226.55042

Sample Name:

```

=====
Acq. Operator   :                               Seq. Line :    4
Acq. Instrument : Instrument 1                 Location  : Vial 31
Injection Date  : 4/17/2016 1:13:12 AM        Inj       :    1
                                                Inj Volume: 5.000 µl

Acq. Method    : C:\CHEM32\1\DATA\DEF_LC 2016-04-17 00-38-55\AD-15-22.M
Last changed   : 9/15/2015 8:34:07 PM
Analysis Method: C:\CHEM32\1\METHODS\AD-01-10-2.0.M
Last changed   : 6/26/2016 9:19:48 PM
                (modified after loading)
Additional Info : Peak(s) manually integrated
  
```

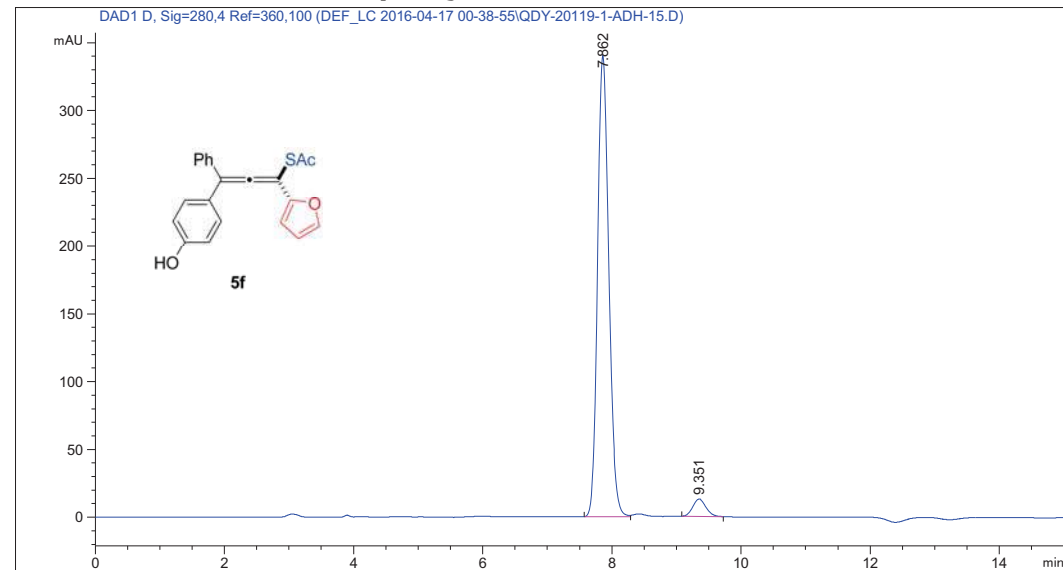

```

=====
Area Percent Report
=====
  
```

```

Sorted By      :      Signal
Multiplier     :      1.0000
Dilution      :      1.0000
Use Multiplier & Dilution Factor with ISTDs
  
```

Signal 1: DAD1 D, Sig=280,4 Ref=360,100

| Peak # | RetTime [min] | Type | Width [min] | Area [mAU*s] | Height [mAU] | Area %  |
|--------|---------------|------|-------------|--------------|--------------|---------|
| 1      | 7.862         | BB   | 0.1866      | 4096.49463   | 340.03119    | 95.6900 |
| 2      | 9.351         | BB   | 0.2203      | 184.51270    | 12.94315     | 4.3100  |

Totals : 4281.00732 352.97434

## Supplementary Figure 193. HPLC spectrum for 5f

Sample Name:

```

=====
Acq. Operator   :                               Seq. Line :    6
Acq. Instrument : Instrument 1                 Location  : Vial 31
Injection Date  : 3/5/2016 3:54:17 PM         Inj       :    1
                                                Inj Volume: 5.000 µl

Acq. Method    : C:\CHEM32\1\DATA\DEF_LC 2016-03-05 14-20-31\AD-15-22.M
Last changed   : 3/5/2016 4:11:52 PM
                (modified after loading)
Analysis Method: C:\CHEM32\1\METHODS\AD-01-10-2.0.M
Last changed   : 6/26/2016 9:27:49 PM
                (modified after loading)
Additional Info : Peak(s) manually integrated
    
```

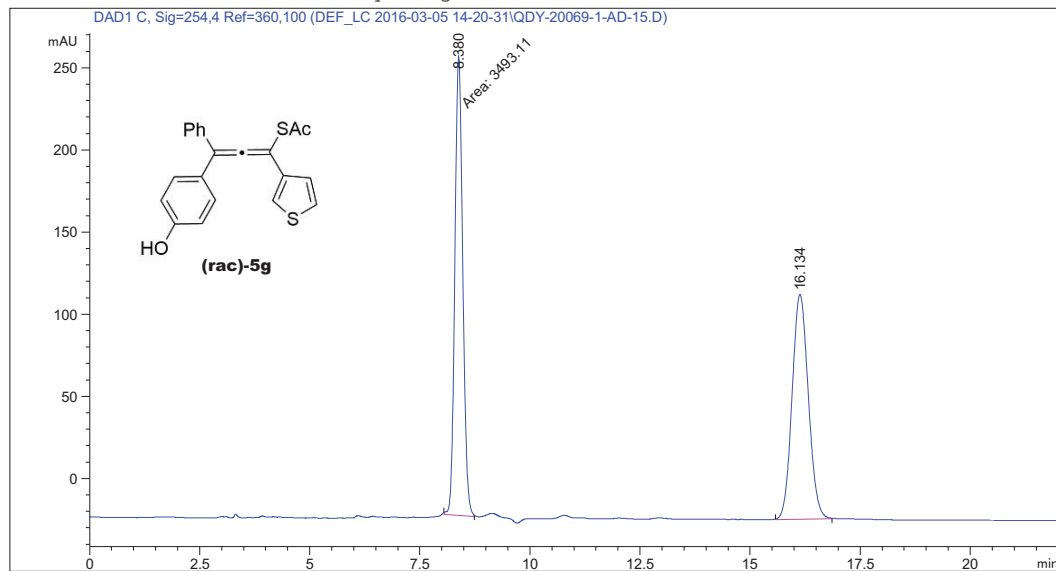

Area Percent Report

```

Sorted By      :      Signal
Multiplier     :      1.0000
Dilution       :      1.0000
Use Multiplier & Dilution Factor with ISTDs
    
```

Signal 1: DAD1 C, Sig=254,4 Ref=360,100

| Peak # | RetTime [min] | Type | Width [min] | Area [mAU*s] | Height [mAU] | Area %  |
|--------|---------------|------|-------------|--------------|--------------|---------|
| 1      | 8.380         | MM   | 0.2083      | 3493.10522   | 279.45023    | 49.9186 |
| 2      | 16.134        | BB   | 0.4008      | 3504.49414   | 136.82832    | 50.0814 |

Totals : 6997.59937 416.27855

Sample Name:

```

=====
Acq. Operator   :                               Seq. Line :   35
Acq. Instrument : Instrument 1                 Location  : Vial 31
Injection Date  : 4/14/2016 9:48:14 PM         Inj       :    1
                                                Inj Volume: 5.000 µl

Acq. Method    : C:\CHEM32\1\DATA\DEF_LC 2016-04-14 10-01-26\AD-15-22.M
Last changed   : 9/15/2015 8:34:07 PM
Analysis Method: C:\CHEM32\1\METHODS\AD-01-10-2.0.M
Last changed   : 6/26/2016 9:27:49 PM
                (modified after loading)
Additional Info : Peak(s) manually integrated
    
```

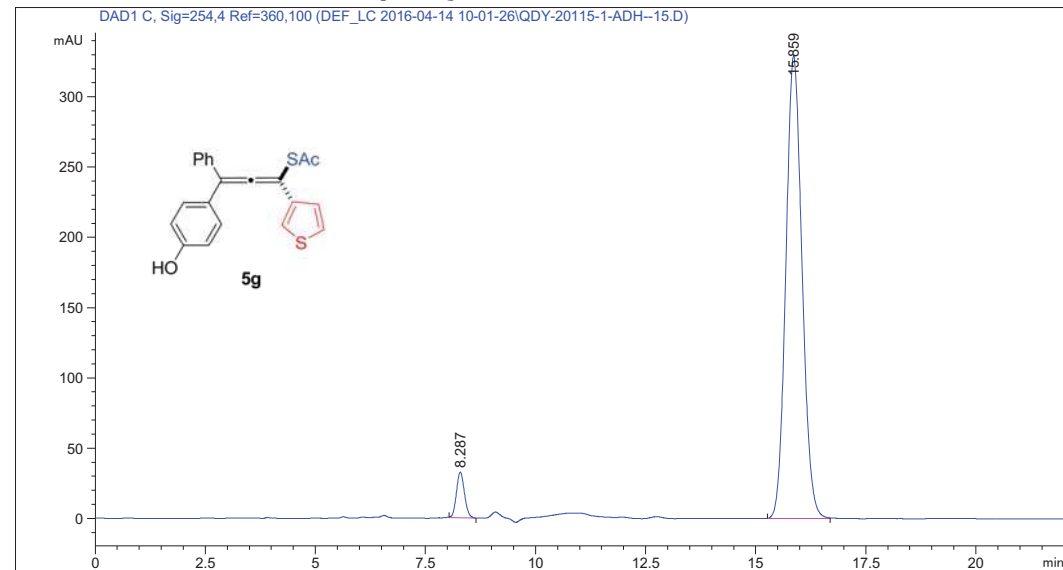

Area Percent Report

```

Sorted By      :      Signal
Multiplier     :      1.0000
Dilution       :      1.0000
Use Multiplier & Dilution Factor with ISTDs
    
```

Signal 1: DAD1 C, Sig=254,4 Ref=360,100

| Peak # | RetTime [min] | Type | Width [min] | Area [mAU*s] | Height [mAU] | Area %  |
|--------|---------------|------|-------------|--------------|--------------|---------|
| 1      | 8.287         | BB   | 0.1976      | 412.45316    | 32.60120     | 4.6671  |
| 2      | 15.859        | BB   | 0.3966      | 8424.96777   | 329.19797    | 95.3329 |

Totals : 8837.42093 361.79917

Supplementary Figure 194. HPLC spectrum for 5g

Sample Name:

```

=====
Acq. Operator   :                               Seq. Line :    7
Acq. Instrument : Instrument 1                 Location  : Vial 31
Injection Date  : 4/16/2016 11:48:40 AM      Inj       :    1
                                                Inj Volume: 5.000 µl

Acq. Method    : C:\CHEM32\1\DATA\DEF_LC 2016-04-16 10-10-47\AD-20-20.M
Last changed   : 7/4/2015 10:27:19 AM
Analysis Method: C:\CHEM32\1\METHODS\AD-01-10-2.0.M
Last changed   : 6/26/2016 8:40:34 PM
                (modified after loading)
Additional Info: Peak(s) manually integrated
    
```

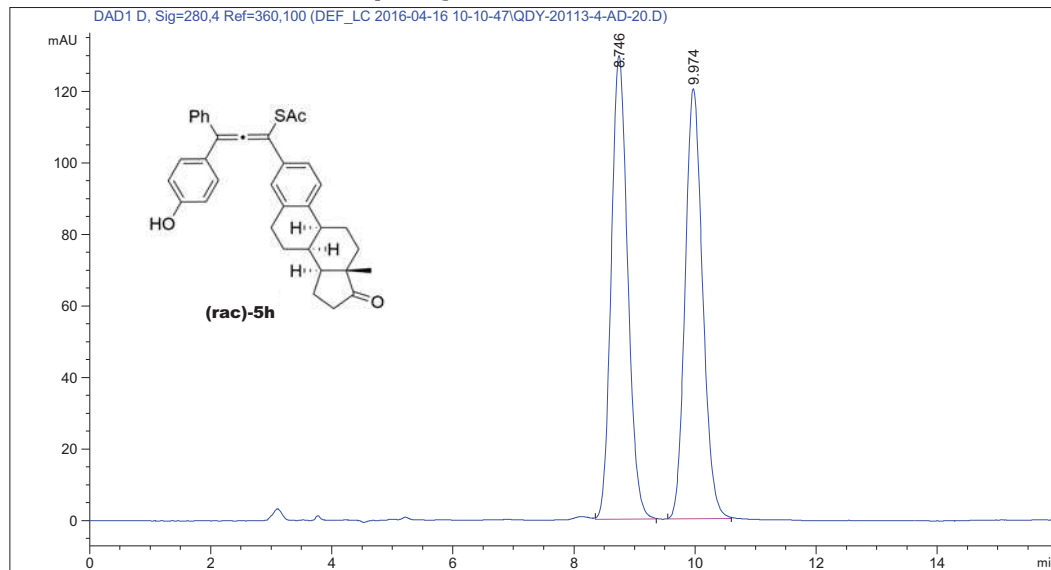

Area Percent Report

```

Sorted By      :      Signal
Multiplier     :      1.0000
Dilution      :      1.0000
Use Multiplier & Dilution Factor with ISTDs
    
```

Signal 1: DAD1 D, Sig=280,4 Ref=360,100

| Peak # | RetTime [min] | Type | Width [min] | Area [mAU*s] | Height [mAU] | Area %  |
|--------|---------------|------|-------------|--------------|--------------|---------|
| 1      | 8.746         | BB   | 0.2927      | 2451.85254   | 129.59225    | 50.4080 |
| 2      | 9.974         | BB   | 0.3102      | 2412.16650   | 120.15545    | 49.5920 |

Totals : 4864.01904 249.74770

Sample Name:

```

=====
Acq. Operator   :                               Seq. Line :    6
Acq. Instrument : Instrument 1                 Location  : Vial 34
Injection Date  : 4/16/2016 11:27:34 AM      Inj       :    1
                                                Inj Volume: 5.000 µl

Acq. Method    : C:\CHEM32\1\DATA\DEF_LC 2016-04-16 10-10-47\AD-20-20.M
Last changed   : 7/4/2015 10:27:19 AM
Analysis Method: C:\CHEM32\1\METHODS\AD-01-10-2.0.M
Last changed   : 6/26/2016 8:40:34 PM
                (modified after loading)
Additional Info: Peak(s) manually integrated
    
```

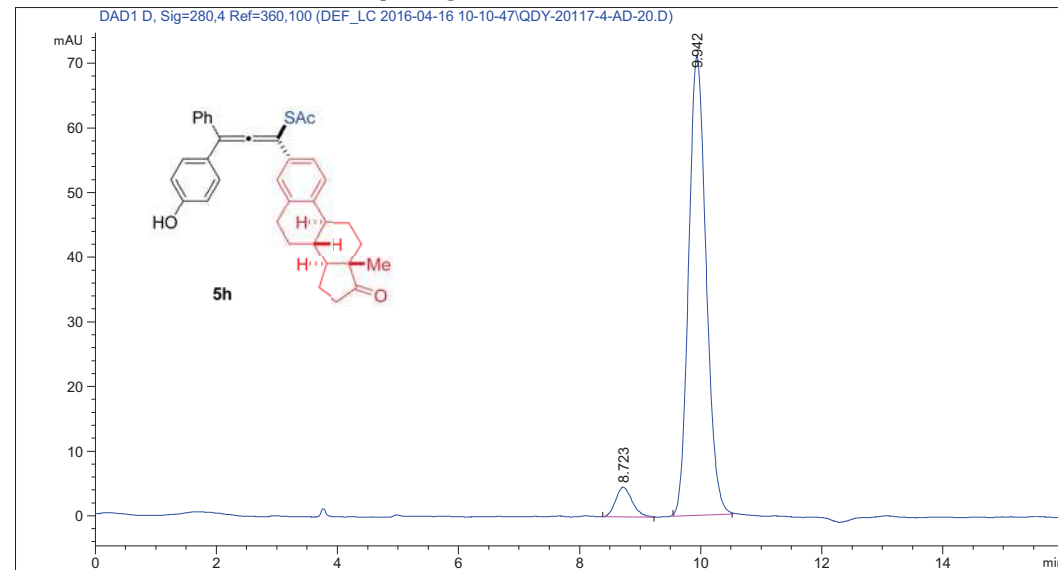

Area Percent Report

```

Sorted By      :      Signal
Multiplier     :      1.0000
Dilution      :      1.0000
Use Multiplier & Dilution Factor with ISTDs
    
```

Signal 1: DAD1 D, Sig=280,4 Ref=360,100

| Peak # | RetTime [min] | Type | Width [min] | Area [mAU*s] | Height [mAU] | Area %  |
|--------|---------------|------|-------------|--------------|--------------|---------|
| 1      | 8.723         | BB   | 0.2887      | 86.59442     | 4.57787      | 5.7274  |
| 2      | 9.942         | BB   | 0.3099      | 1425.34900   | 71.10870     | 94.2726 |

Totals : 1511.94342 75.68657

Supplementary Figure 195. HPLC spectrum for 5h



Sample Name:

```

=====
Acq. Operator   :                               Seq. Line :    4
Acq. Instrument : Instrument 1                   Location  : Vial 32
Injection Date  : 1/27/2016 12:12:58 AM         Inj       :    1
                                                    Inj Volume: 5.000 µl

Acq. Method     : C:\CHEM32\1\DATA\DEF_LC 2016-01-26 23-17-00\AD-10-30.M
Last changed    : 11/30/2015 12:57:24 PM
Analysis Method : C:\CHEM32\1\METHODS\AD-01-10-2.0.M
Last changed    : 6/27/2016 11:28:15 PM
                  (modified after loading)
Additional Info : Peak(s) manually integrated
  
```

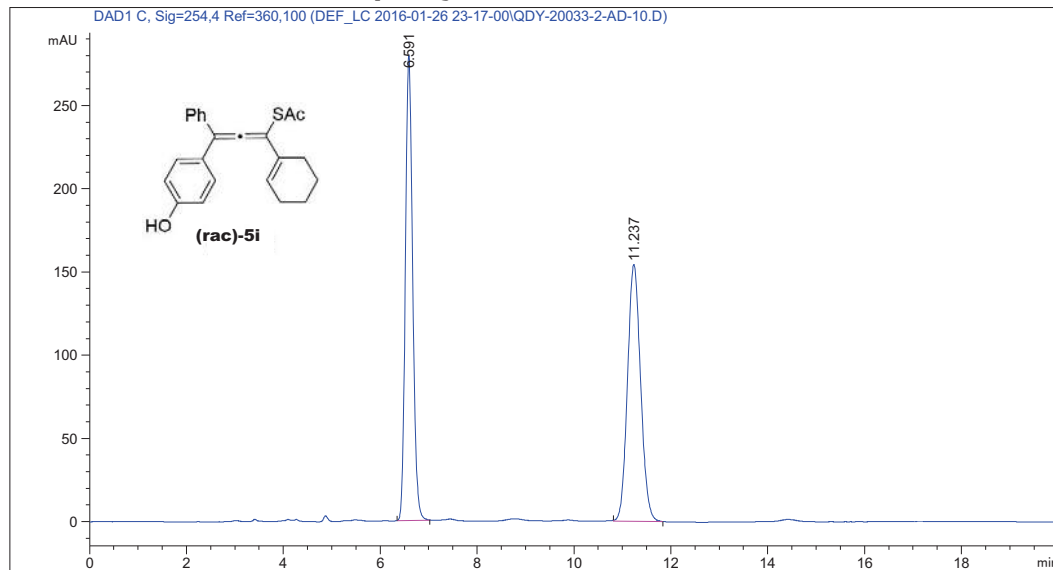

```

=====
Area Percent Report
=====
  
```

```

Sorted By      :      Signal
Multiplier     :      1.0000
Dilution      :      1.0000
Use Multiplier & Dilution Factor with ISTDs
  
```

Signal 1: DAD1 C, Sig=254,4 Ref=360,100

| Peak # | RetTime [min] | Type | Width [min] | Area [mAU*s] | Height [mAU] | Area %  |
|--------|---------------|------|-------------|--------------|--------------|---------|
| 1      | 6.591         | BB   | 0.1619      | 2919.46143   | 279.40152    | 50.0987 |
| 2      | 11.237        | BB   | 0.2918      | 2907.95361   | 154.31596    | 49.9013 |

Totals :                                    5827.41504    433.71748

Sample Name:

```

=====
Acq. Operator   :                               Seq. Line :   45
Acq. Instrument : Instrument 1                   Location  : Vial 32
Injection Date  : 5/7/2016 11:46:26 PM         Inj       :    1
                                                    Inj Volume: 5.000 µl

Acq. Method     : C:\CHEM32\1\DATA\DEF_LC 2016-05-07 09-30-19\AD-10-20.M
Last changed    : 11/28/2014 10:15:17 AM
Analysis Method : C:\CHEM32\1\METHODS\AD-01-10-2.0.M
Last changed    : 6/26/2016 2:13:09 PM
                  (modified after loading)
Additional Info : Peak(s) manually integrated
  
```

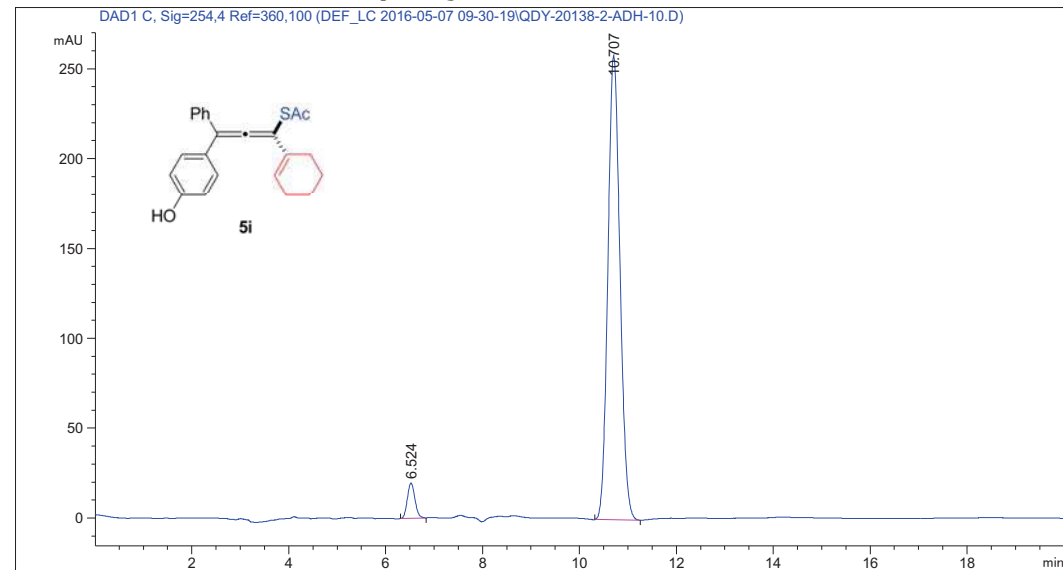

```

=====
Area Percent Report
=====
  
```

```

Sorted By      :      Signal
Multiplier     :      1.0000
Dilution      :      1.0000
Use Multiplier & Dilution Factor with ISTDs
  
```

Signal 1: DAD1 C, Sig=254,4 Ref=360,100

| Peak # | RetTime [min] | Type | Width [min] | Area [mAU*s] | Height [mAU] | Area %  |
|--------|---------------|------|-------------|--------------|--------------|---------|
| 1      | 6.524         | BB   | 0.1698      | 211.17703    | 19.58147     | 4.5187  |
| 2      | 10.707        | BB   | 0.2676      | 4462.21826   | 258.18164    | 95.4813 |

Totals :                                    4673.39529    277.76311

**Supplementary Figure 196. HPLC spectrum for 5i**



Sample Name:

```

=====
Acq. Operator   :                               Seq. Line :    7
Acq. Instrument : Instrument 1                 Location  : Vial 31
Injection Date  : 1/22/2016 11:18:59 PM      Inj       :    1
                                                Inj Volume: 5.000 µl

Acq. Method    : C:\CHEM32\1\DATA\DEF_LC 2016-01-22 21-44-58\AD-05-20.M
Last changed   : 10/14/2015 3:51:32 PM
Analysis Method : C:\CHEM32\1\METHODS\AD-01-10-2.0.M
Last changed   : 6/26/2016 2:05:13 PM
                (modified after loading)
    
```

Additional Info : Peak(s) manually integrated

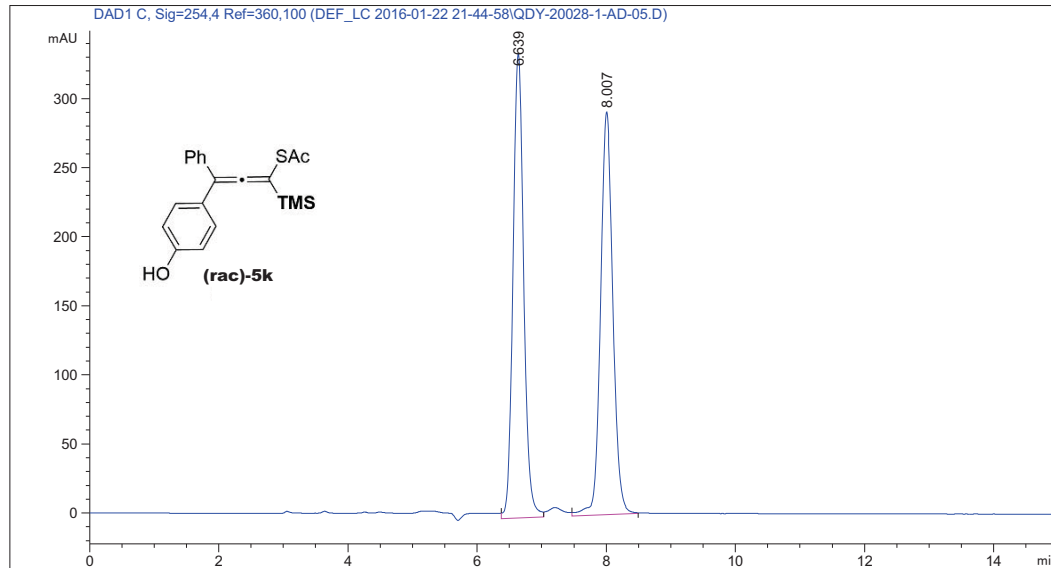

Area Percent Report

```

Sorted By      :      Signal
Multiplier     :      1.0000
Dilution       :      1.0000
Use Multiplier & Dilution Factor with ISTDs
    
```

Signal 1: DAD1 C, Sig=254,4 Ref=360,100

| Peak # | RetTime [min] | Type | Width [min] | Area [mAU*s] | Height [mAU] | Area %  |
|--------|---------------|------|-------------|--------------|--------------|---------|
| 1      | 6.639         | BV   | 0.1785      | 3878.38232   | 336.35043    | 50.0397 |
| 2      | 8.007         | VB   | 0.2049      | 3872.23242   | 291.63898    | 49.9603 |

Totals : 7750.61475 627.98941

**Supplementary Figure 198. HPLC spectrum for 5k**

Sample Name:

```

=====
Acq. Operator   :                               Seq. Line :   10
Acq. Instrument : Instrument 1                 Location  : Vial 31
Injection Date  : 2/19/2016 9:04:18 PM      Inj       :    1
                                                Inj Volume: 5.000 µl

Acq. Method    : C:\CHEM32\1\DATA\DEF_LC 2016-02-19 19-21-26\AD-05-15.M
Last changed   : 7/8/2015 4:31:16 PM
Analysis Method : C:\CHEM32\1\METHODS\AD-01-10-2.0.M
Last changed   : 6/26/2016 2:05:13 PM
                (modified after loading)
    
```

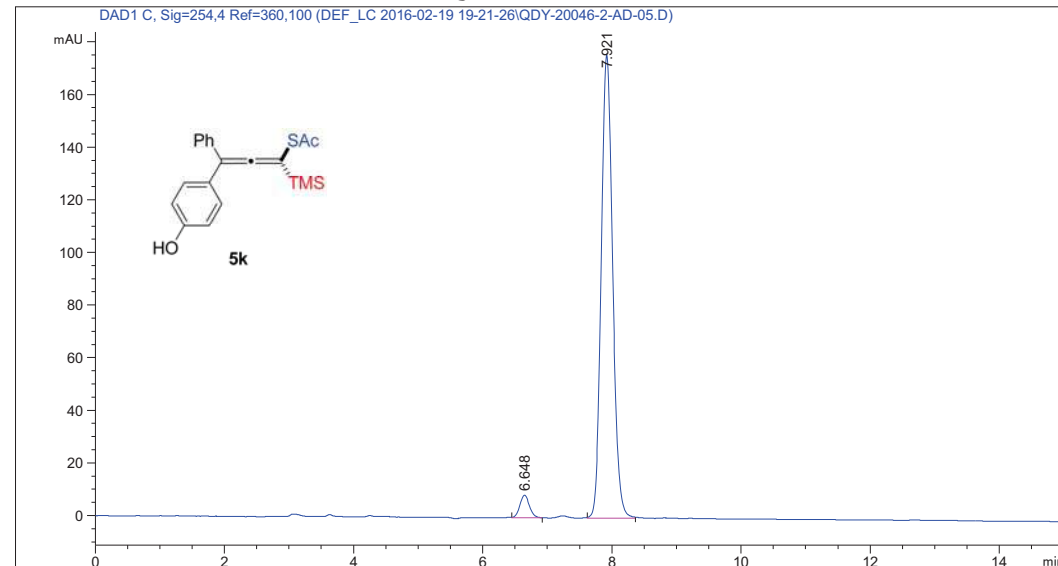

Area Percent Report

```

Sorted By      :      Signal
Multiplier     :      1.0000
Dilution       :      1.0000
Use Multiplier & Dilution Factor with ISTDs
    
```

Signal 1: DAD1 C, Sig=254,4 Ref=360,100

| Peak # | RetTime [min] | Type | Width [min] | Area [mAU*s] | Height [mAU] | Area %  |
|--------|---------------|------|-------------|--------------|--------------|---------|
| 1      | 6.648         | BB   | 0.1604      | 88.50684     | 8.57913      | 3.9644  |
| 2      | 7.921         | BB   | 0.1882      | 2144.02930   | 175.93285    | 96.0356 |

Totals : 2232.53613 184.51197

\*\*\* End of Report \*\*\*

Sample Name:

```

=====
Acq. Operator   :                               Seq. Line :    7
Acq. Instrument : Instrument 1                 Location  : Vial 32
Injection Date  : 4/1/2016 1:05:56 AM         Inj       :    1
                                                Inj Volume: 5.000 µl

Acq. Method    : C:\CHEM32\1\DATA\DEF_LC 2016-03-31 22-59-06\AD-03-30.M
Last changed   : 1/30/2015 10:17:06 AM
Analysis Method: C:\CHEM32\1\METHODS\AD-01-10-2.0.M
Last changed   : 6/26/2016 3:55:25 PM
                (modified after loading)
Additional Info: Peak(s) manually integrated
    
```

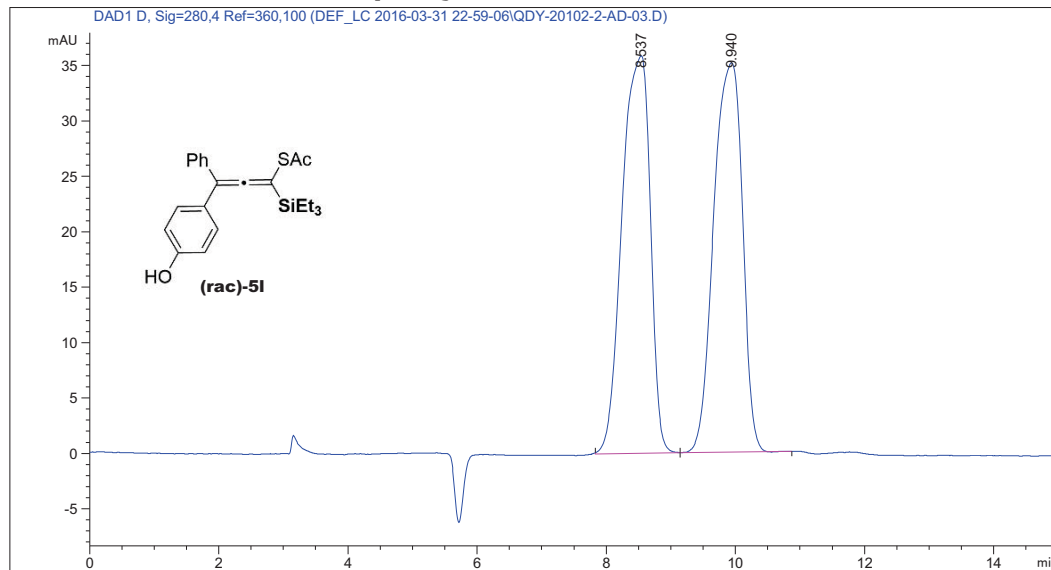

Area Percent Report

```

=====
Sorted By      :      Signal
Multiplier     :      1.0000
Dilution       :      1.0000
Use Multiplier & Dilution Factor with ISTDs
    
```

Signal 1: DAD1 D, Sig=280,4 Ref=360,100

| Peak #   | RetTime [min] | Type | Width [min] | Area [mAU*s] | Height [mAU] | Area %  |
|----------|---------------|------|-------------|--------------|--------------|---------|
| 1        | 8.537         | BV   | 0.4946      | 1090.32153   | 35.86992     | 50.1032 |
| 2        | 9.940         | VB   | 0.5005      | 1085.82886   | 35.13862     | 49.8968 |
| Totals : |               |      |             | 2176.15039   | 71.00854     |         |

Sample Name:

```

=====
Acq. Operator   :                               Seq. Line :    7
Acq. Instrument : Instrument 1                 Location  : Vial 32
Injection Date  : 4/16/2016 5:09:50 PM       Inj       :    1
                                                Inj Volume: 5.000 µl

Acq. Method    : C:\CHEM32\1\DATA\DEF_LC 2016-04-16 15-13-11\AD-03-20.M
Last changed   : 4/16/2016 5:22:49 PM
                (modified after loading)
Analysis Method: C:\CHEM32\1\METHODS\AD-01-10-2.0.M
Last changed   : 6/26/2016 3:55:25 PM
                (modified after loading)
Additional Info: Peak(s) manually integrated
    
```

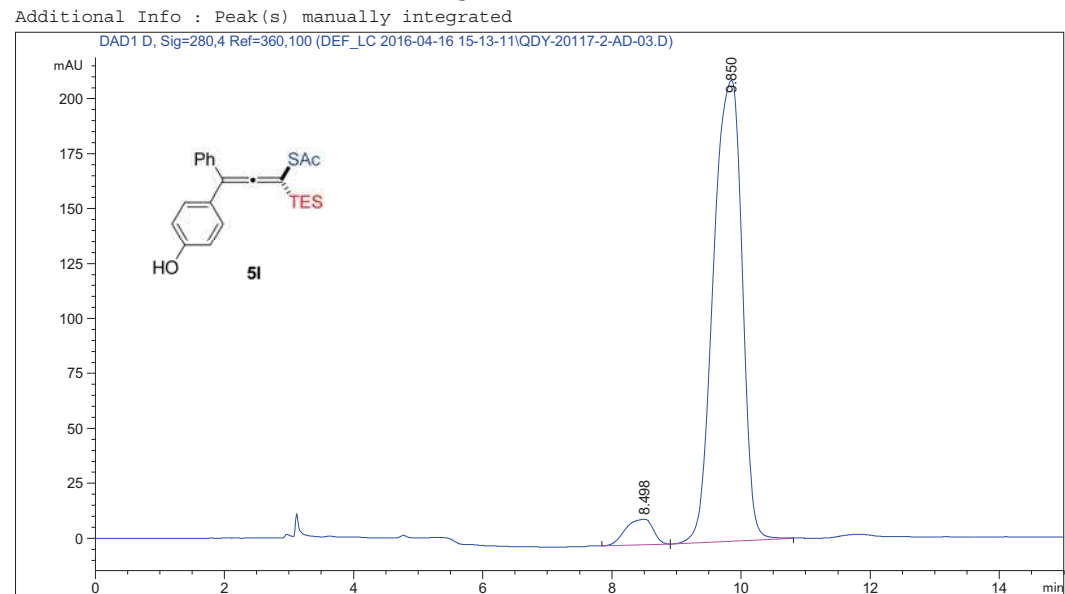

Area Percent Report

```

=====
Sorted By      :      Signal
Multiplier     :      1.0000
Dilution       :      1.0000
Use Multiplier & Dilution Factor with ISTDs
    
```

Signal 1: DAD1 D, Sig=280,4 Ref=360,100

| Peak #   | RetTime [min] | Type | Width [min] | Area [mAU*s] | Height [mAU] | Area %  |
|----------|---------------|------|-------------|--------------|--------------|---------|
| 1        | 8.498         | BV   | 0.4241      | 341.95050    | 11.59381     | 5.0289  |
| 2        | 9.850         | VB   | 0.5034      | 6457.77686   | 209.60730    | 94.9711 |
| Totals : |               |      |             | 6799.72736   | 221.20111    |         |

**Supplementary Figure 199. HPLC spectrum for 5I**

Sample Name:

```

=====
Acq. Operator   :                               Seq. Line :    4
Acq. Instrument : Instrument 1                   Location  : Vial 31
Injection Date  : 3/12/2016 12:03:15 PM         Inj       :    1
                                                    Inj Volume: 5.000 µl

Acq. Method    : C:\CHEM32\1\DATA\DEF_LC 2016-03-12 11-07-21\AD-05-30.M
Last changed   : 3/12/2016 12:20:26 PM
                (modified after loading)
Analysis Method: C:\CHEM32\1\METHODS\AD-01-10-2.0.M
Last changed   : 6/26/2016 3:10:06 PM
                (modified after loading)
Additional Info : Peak(s) manually integrated
    
```

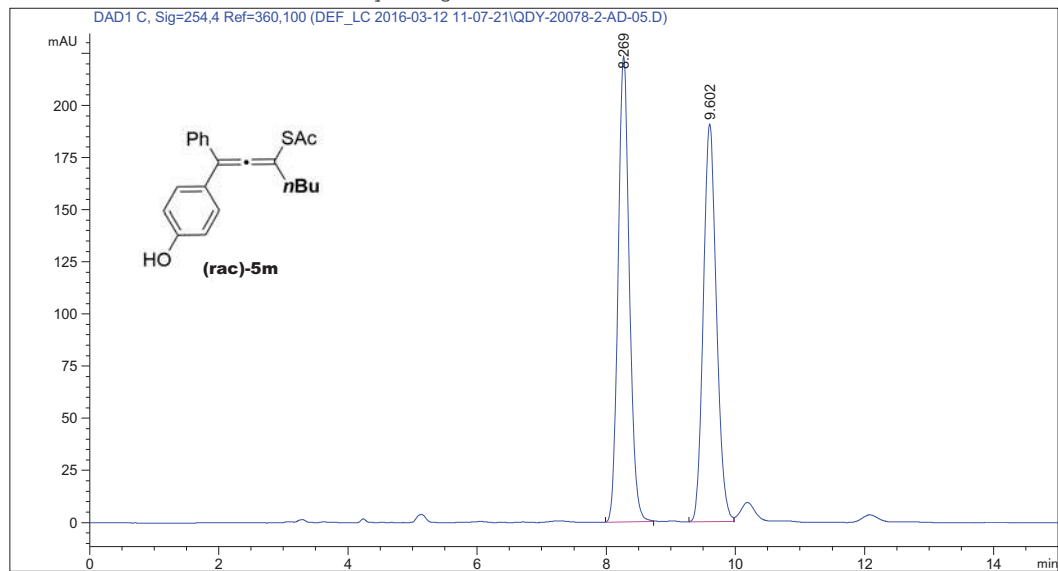

Area Percent Report

```

Sorted By      :      Signal
Multiplier     :      1.0000
Dilution       :      1.0000
Use Multiplier & Dilution Factor with ISTDs
    
```

Signal 1: DAD1 C, Sig=254,4 Ref=360,100

| Peak # | RetTime [min] | Type | Width [min] | Area [mAU*s] | Height [mAU] | Area %  |
|--------|---------------|------|-------------|--------------|--------------|---------|
| 1      | 8.269         | BB   | 0.1876      | 2708.51978   | 223.12842    | 50.1121 |
| 2      | 9.602         | BV   | 0.2190      | 2696.39819   | 190.68352    | 49.8879 |

Totals : 5404.91797 413.81194

Sample Name:

```

=====
Acq. Operator   :                               Seq. Line :   13
Acq. Instrument : Instrument 1                   Location  : Vial 33
Injection Date  : 3/30/2016 6:42:27 PM         Inj       :    1
                                                    Inj Volume: 5.000 µl

Acq. Method    : C:\CHEM32\1\DATA\DEF_LC 2016-03-30 13-35-29\AD-05-15.M
Last changed   : 7/8/2015 4:31:16 PM
Analysis Method: C:\CHEM32\1\METHODS\AD-01-10-2.0.M
Last changed   : 6/26/2016 2:50:44 PM
                (modified after loading)
Additional Info : Peak(s) manually integrated
    
```

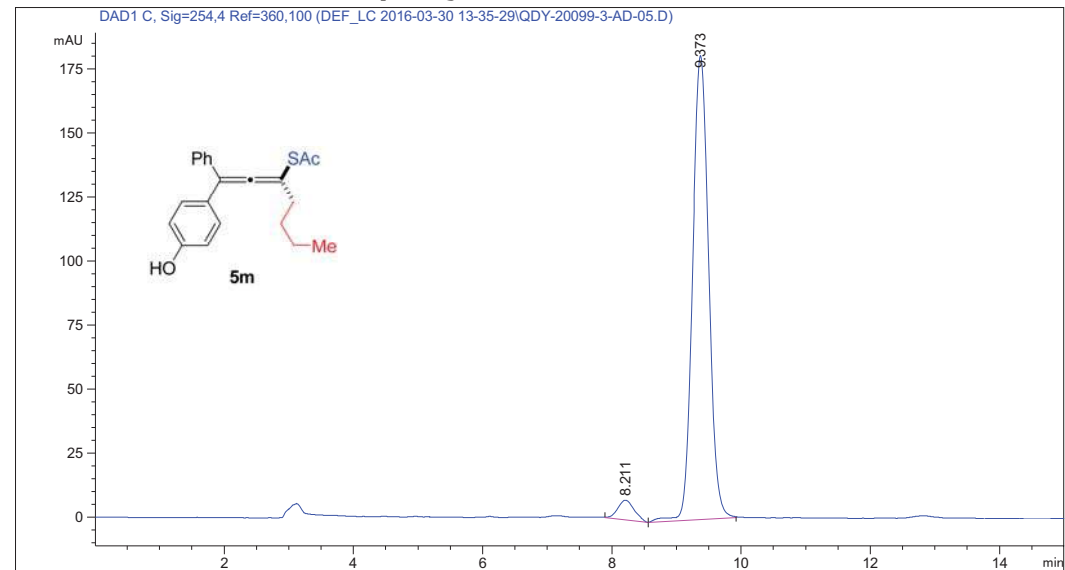

Area Percent Report

```

Sorted By      :      Signal
Multiplier     :      1.0000
Dilution       :      1.0000
Use Multiplier & Dilution Factor with ISTDs
    
```

Signal 1: DAD1 C, Sig=254,4 Ref=360,100

| Peak # | RetTime [min] | Type | Width [min] | Area [mAU*s] | Height [mAU] | Area %  |
|--------|---------------|------|-------------|--------------|--------------|---------|
| 1      | 8.211         | BV   | 0.2769      | 136.74849    | 7.71228      | 4.1759  |
| 2      | 9.373         | VB   | 0.2720      | 3137.98779   | 181.20929    | 95.8241 |

Totals : 3274.73628 188.92157

Supplementary Figure 200. HPLC spectrum for 5m

Sample Name:

```

=====
Acq. Operator   :                               Seq. Line :   24
Acq. Instrument : Instrument 1                   Location  : Vial 35
Injection Date  : 4/19/2016 2:32:40 AM          Inj       :    1
                                                    Inj Volume: 5.000 µl

Acq. Method    : C:\CHEM32\1\DATA\DEF_LC 2016-04-18 19-47-40\AD-05-30.M
Last changed   : 4/19/2016 2:31:49 AM
                (modified after loading)
Analysis Method: C:\CHEM32\1\METHODS\AD-01-10-2.0.M
Last changed   : 6/26/2016 4:03:06 PM
                (modified after loading)
Additional Info : Peak(s) manually integrated
    
```

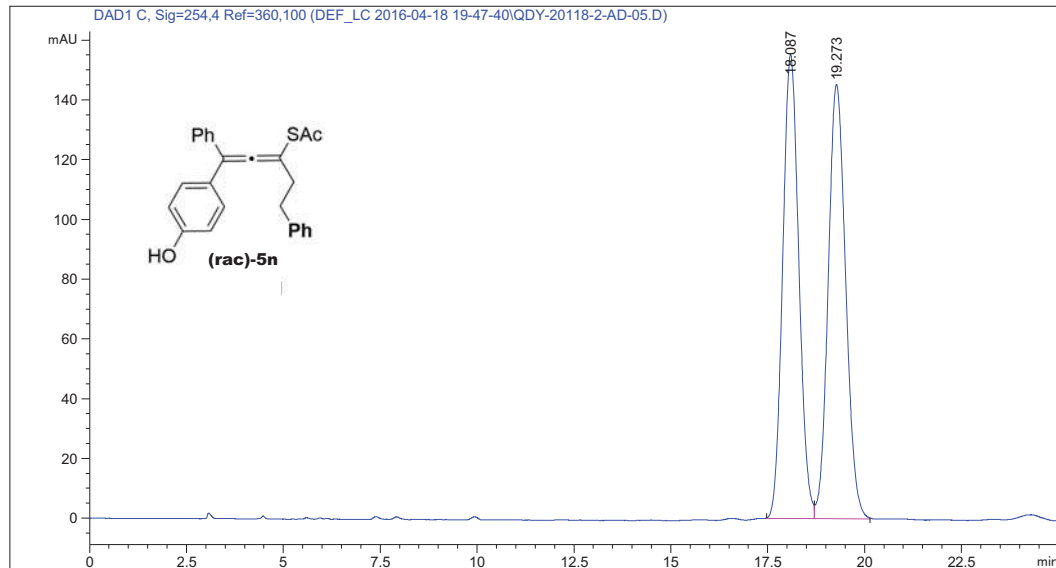

Area Percent Report

```

Sorted By      :      Signal
Multiplier     :      1.0000
Dilution       :      1.0000
Use Multiplier & Dilution Factor with ISTDs
    
```

Signal 1: DAD1 C, Sig=254,4 Ref=360,100

| Peak # | RetTime [min] | Type | Width [min] | Area [mAU*s] | Height [mAU] | Area %  |
|--------|---------------|------|-------------|--------------|--------------|---------|
| 1      | 18.087        | BV   | 0.4539      | 4498.68213   | 155.34293    | 49.6694 |
| 2      | 19.273        | VB   | 0.4899      | 4558.57422   | 145.34494    | 50.3306 |

Totals : 9057.25635 300.68787

**Supplementary Figure 201. HPLC spectrum for 5n**

Sample Name:

```

=====
Acq. Operator   :                               Seq. Line :   35
Acq. Instrument : Instrument 1                   Location  : Vial 32
Injection Date  : 4/22/2016 12:24:04 AM          Inj       :    1
                                                    Inj Volume: 5.000 µl

Acq. Method    : C:\CHEM32\1\DATA\DEF_LC 2016-04-21 13-13-00\AD-05-30.M
Last changed   : 8/31/2012 5:22:01 PM
Analysis Method: C:\CHEM32\1\METHODS\AD-01-10-2.0.M
Last changed   : 6/26/2016 4:03:06 PM
                (modified after loading)
Additional Info : Peak(s) manually integrated
    
```

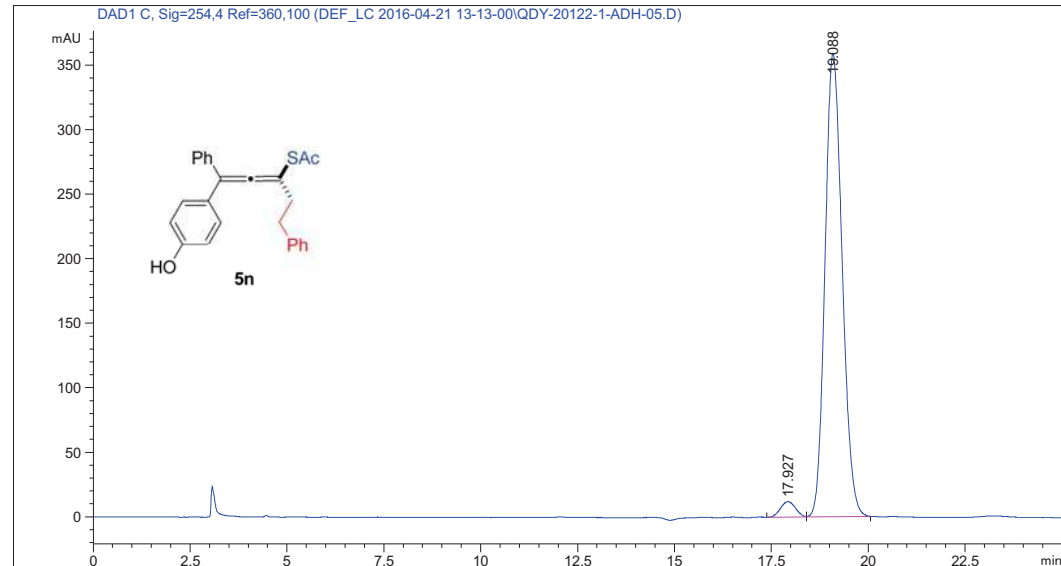

Area Percent Report

```

Sorted By      :      Signal
Multiplier     :      1.0000
Dilution       :      1.0000
Use Multiplier & Dilution Factor with ISTDs
    
```

Signal 1: DAD1 C, Sig=254,4 Ref=360,100

| Peak # | RetTime [min] | Type | Width [min] | Area [mAU*s] | Height [mAU] | Area %  |
|--------|---------------|------|-------------|--------------|--------------|---------|
| 1      | 17.927        | BV   | 0.4259      | 323.51538    | 12.02499     | 2.8466  |
| 2      | 19.088        | VB   | 0.4830      | 1.10415e4    | 358.84393    | 97.1534 |

Totals : 1.13650e4 370.86892

Sample Name:

```

=====
Acq. Operator   :                               Seq. Line :   21
Acq. Instrument : Instrument 1                   Location  : Vial 34
Injection Date  : 4/16/2016 9:20:06 PM          Inj       :    1
                                                    Inj Volume: 5.000 µl

Acq. Method    : C:\CHEM32\1\DATA\DEF_LC 2016-04-16 15-13-11\AD-05-20.M
Last changed   : 10/14/2015 3:51:32 PM
Analysis Method: C:\CHEM32\1\METHODS\AD-01-10-2.0.M
Last changed   : 6/26/2016 1:41:03 PM
                (modified after loading)
Additional Info: Peak(s) manually integrated
  
```

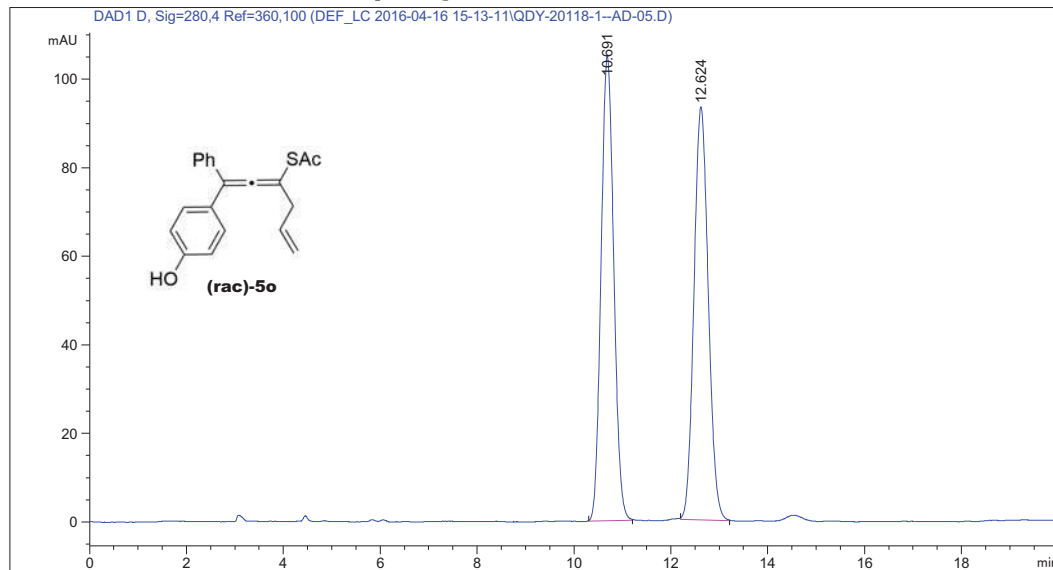

```

=====
Area Percent Report
=====
  
```

```

Sorted By      :      Signal
Multiplier     :      1.0000
Dilution      :      1.0000
Use Multiplier & Dilution Factor with ISTDs
  
```

Signal 1: DAD1 D, Sig=280,4 Ref=360,100

| Peak # | RetTime [min] | Type | Width [min] | Area [mAU*s] | Height [mAU] | Area %  |
|--------|---------------|------|-------------|--------------|--------------|---------|
| 1      | 10.691        | BB   | 0.2858      | 1906.98474   | 105.06792    | 49.9276 |
| 2      | 12.624        | BB   | 0.3212      | 1912.51782   | 93.29216     | 50.0724 |

Totals :                    3819.50256    198.36008

Sample Name:

```

=====
Acq. Operator   :                               Seq. Line :   20
Acq. Instrument : Instrument 1                   Location  : Vial 32
Injection Date  : 6/16/2016 10:44:01 PM          Inj       :    1
                                                    Inj Volume: 5.000 µl

Acq. Method    : C:\CHEM32\1\DATA\QDY 2016-06-16 16-15-19\AD-05-20.M
Last changed   : 6/16/2016 10:43:09 PM
                (modified after loading)
Analysis Method: C:\CHEM32\1\METHODS\AD-01-10-2.0.M
Last changed   : 6/26/2016 1:41:03 PM
                (modified after loading)
Additional Info: Peak(s) manually integrated
  
```

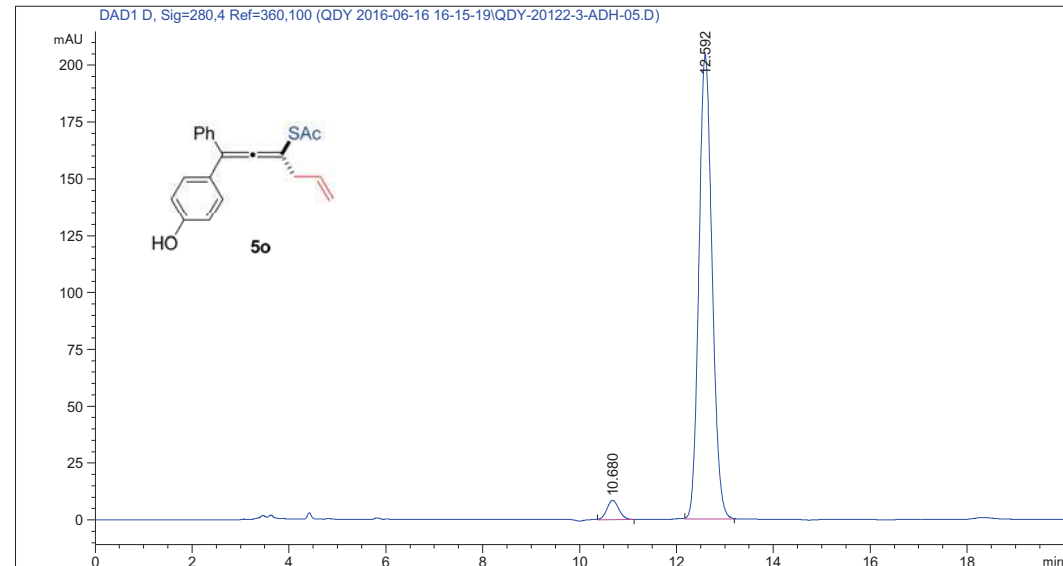

```

=====
Area Percent Report
=====
  
```

```

Sorted By      :      Signal
Multiplier     :      1.0000
Dilution      :      1.0000
Use Multiplier & Dilution Factor with ISTDs
  
```

Signal 1: DAD1 D, Sig=280,4 Ref=360,100

| Peak # | RetTime [min] | Type | Width [min] | Area [mAU*s] | Height [mAU] | Area %  |
|--------|---------------|------|-------------|--------------|--------------|---------|
| 1      | 10.680        | BB   | 0.2657      | 145.52939    | 8.50029      | 3.6314  |
| 2      | 12.592        | BB   | 0.2946      | 3862.04248   | 204.24312    | 96.3686 |

Totals :                    4007.57187    212.74341

## Supplementary Figure 202. HPLC spectrum for 5o

Sample Name:

```

=====
Acq. Operator   :                               Seq. Line :   32
Acq. Instrument : Instrument 1                 Location  : Vial 32
Injection Date  : 3/19/2016 10:32:01 PM      Inj       :    1
                                                Inj Volume: 5.000 µl

Acq. Method    : C:\CHEM32\1\DATA\DEF_LC 2016-03-19 10-48-51\AD-05-30.M
Last changed   : 3/19/2016 10:31:10 PM
                (modified after loading)
Analysis Method: C:\CHEM32\1\METHODS\AD-01-10-2.0.M
Last changed   : 6/26/2016 8:35:21 PM
                (modified after loading)
Additional Info : Peak(s) manually integrated
  
```

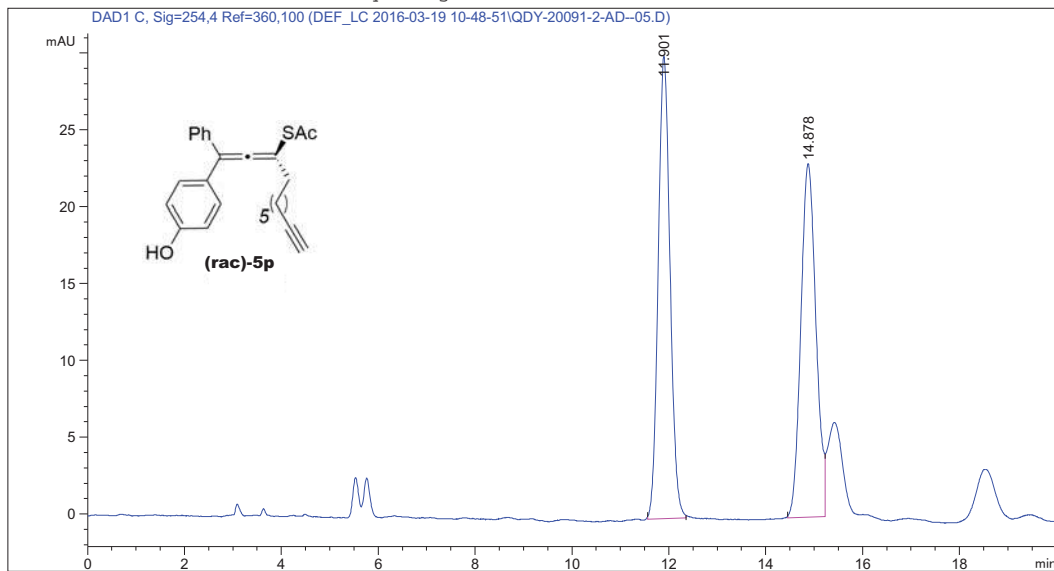

```

=====
Area Percent Report
=====
  
```

```

Sorted By      :      Signal
Multiplier     :      1.0000
Dilution       :      1.0000
Use Multiplier & Dilution Factor with ISTDs
  
```

Signal 1: DAD1 C, Sig=254,4 Ref=360,100

| Peak # | RetTime [min] | Type | Width [min] | Area [mAU*s] | Height [mAU] | Area %  |
|--------|---------------|------|-------------|--------------|--------------|---------|
| 1      | 11.901        | BB   | 0.2634      | 508.70099    | 30.07041     | 50.4435 |
| 2      | 14.878        | BV   | 0.3393      | 499.75665    | 23.01589     | 49.5565 |

Totals : 1008.45764 53.08629

Sample Name:

```

=====
Acq. Operator   :                               Seq. Line :    5
Acq. Instrument : Instrument 1                 Location  : Vial 34
Injection Date  : 3/31/2016 11:24:51 AM      Inj       :    1
                                                Inj Volume: 5.000 µl

Acq. Method    : C:\CHEM32\1\DATA\DEF_LC 2016-03-31 10-15-06\AD-05-20.M
Last changed   : 3/31/2016 11:27:42 AM
                (modified after loading)
Analysis Method: C:\CHEM32\1\METHODS\AD-01-10-2.0.M
Last changed   : 6/26/2016 8:32:29 PM
                (modified after loading)
Additional Info : Peak(s) manually integrated
  
```

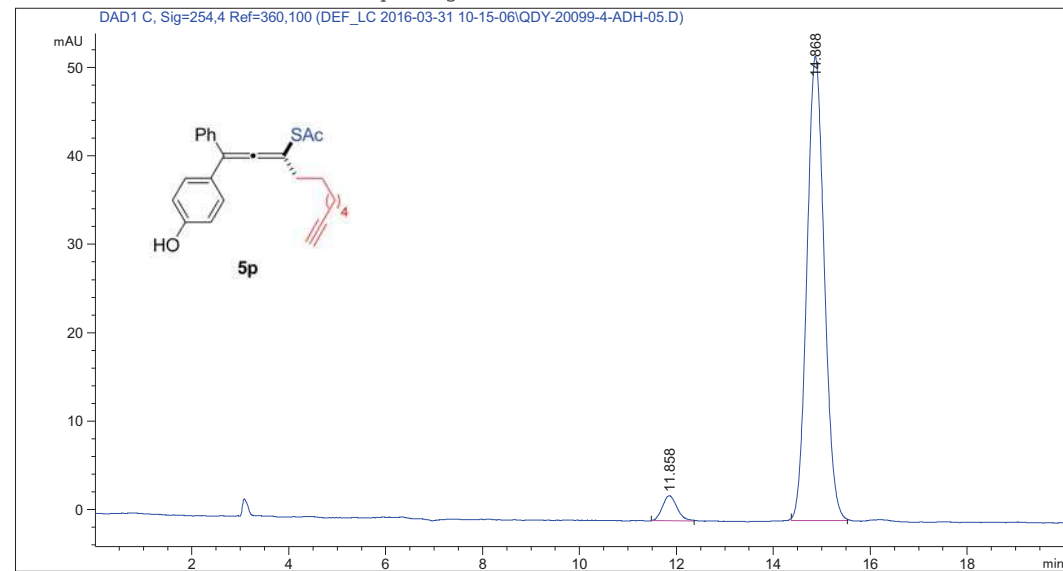

```

=====
Area Percent Report
=====
  
```

```

Sorted By      :      Signal
Multiplier     :      1.0000
Dilution       :      1.0000
Use Multiplier & Dilution Factor with ISTDs
  
```

Signal 1: DAD1 C, Sig=254,4 Ref=360,100

| Peak # | RetTime [min] | Type | Width [min] | Area [mAU*s] | Height [mAU] | Area %  |
|--------|---------------|------|-------------|--------------|--------------|---------|
| 1      | 11.858        | BB   | 0.2872      | 58.77607     | 2.81997      | 4.3129  |
| 2      | 14.868        | BB   | 0.3859      | 1304.01526   | 52.48608     | 95.6871 |

Totals : 1362.79133 55.30606

### Supplementary Figure 203. HPLC spectrum for 5p



Sample Name:

```

=====
Acq. Operator   :                               Seq. Line :   85
Acq. Instrument : Instrument 1                   Location  : Vial 33
Injection Date  : 4/2/2016 10:04:16 PM          Inj       :    1
                                                    Inj Volume: 5.000 µl

Acq. Method    : C:\CHEM32\1\DATA\DEF_LC 2016-04-01 15-35-39\OD-05-40-0.5.M
Last changed   : 12/11/2014 6:35:45 PM
Analysis Method: C:\CHEM32\1\METHODS\AD-01-10-2.0.M
Last changed   : 6/26/2016 4:11:48 PM
                (modified after loading)
Additional Info : Peak(s) manually integrated
  
```

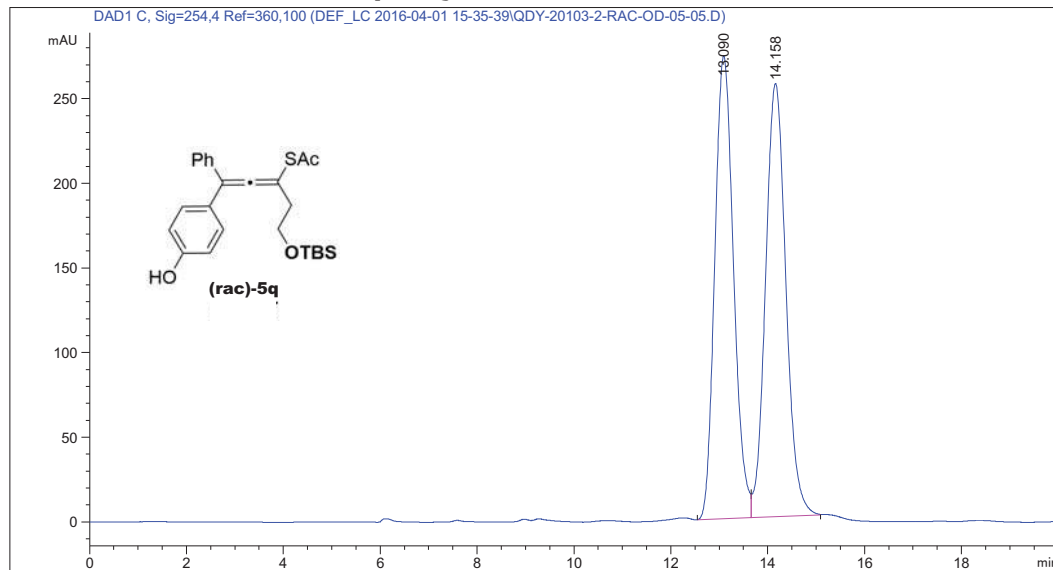

```

=====
Area Percent Report
=====
  
```

```

Sorted By      :      Signal
Multiplier     :      1.0000
Dilution      :      1.0000
Use Multiplier & Dilution Factor with ISTDs
  
```

Signal 1: DAD1 C, Sig=254,4 Ref=360,100

| Peak # | RetTime [min] | Type | Width [min] | Area [mAU*s] | Height [mAU] | Area %  |
|--------|---------------|------|-------------|--------------|--------------|---------|
| 1      | 13.090        | BV   | 0.4200      | 7359.00879   | 273.43948    | 49.6634 |
| 2      | 14.158        | VB   | 0.4540      | 7458.77197   | 255.94975    | 50.3366 |

Totals :                    1.48178e4    529.38924

Sample Name:

```

=====
Acq. Operator   :                               Seq. Line :    2
Acq. Instrument : Instrument 1                   Location  : Vial 32
Injection Date  : 4/7/2016 3:30:20 PM          Inj       :    1
                                                    Inj Volume: 5.000 µl

Acq. Method    : C:\CHEM32\1\DATA\DEF_LC 2016-04-07 15-16-52\OD-05-20-0.5.M
Last changed   : 4/7/2016 10:27:36 AM
Analysis Method: C:\CHEM32\1\METHODS\AD-01-10-2.0.M
Last changed   : 6/26/2016 4:09:19 PM
                (modified after loading)
Additional Info : Peak(s) manually integrated
  
```

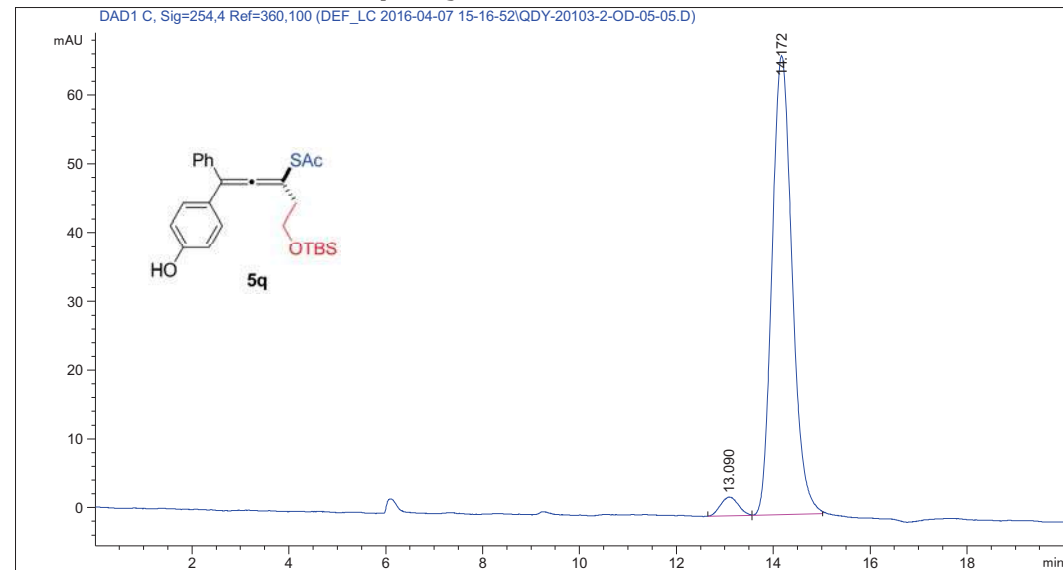

```

=====
Area Percent Report
=====
  
```

```

Sorted By      :      Signal
Multiplier     :      1.0000
Dilution      :      1.0000
Use Multiplier & Dilution Factor with ISTDs
  
```

Signal 1: DAD1 C, Sig=254,4 Ref=360,100

| Peak # | RetTime [min] | Type | Width [min] | Area [mAU*s] | Height [mAU] | Area %  |
|--------|---------------|------|-------------|--------------|--------------|---------|
| 1      | 13.090        | BV   | 0.3273      | 69.24229     | 2.71682      | 3.4859  |
| 2      | 14.172        | VB   | 0.4450      | 1917.12439   | 66.75624     | 96.5141 |

Totals :                    1986.36668    69.47306

**Supplementary Figure 204. HPLC spectrum for 5q**

Sample Name:

```

=====
Acq. Operator   :                               Seq. Line :    9
Acq. Instrument : Instrument 1                 Location  : Vial 31
Injection Date  : 4/12/2016 5:37:31 PM        Inj       :    1
                                                Inj Volume: 5.000 µl

Acq. Method    : C:\CHEM32\1\DATA\DEF_LC 2016-04-12 14-34-50\AD-10-20.M
Last changed   : 11/28/2014 10:15:17 AM
Analysis Method: C:\CHEM32\1\METHODS\AD-01-10-2.0.M
Last changed   : 6/26/2016 4:17:43 PM
                (modified after loading)
Additional Info : Peak(s) manually integrated
  
```

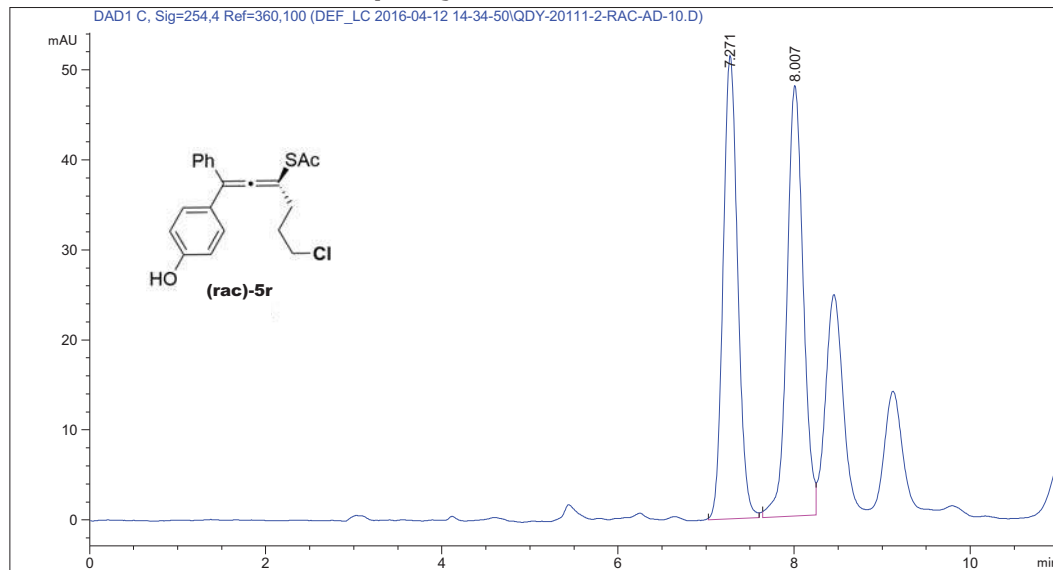

```

=====
Area Percent Report
=====
  
```

```

Sorted By      :      Signal
Multiplier     :      1.0000
Dilution      :      1.0000
Use Multiplier & Dilution Factor with ISTDs
  
```

Signal 1: DAD1 C, Sig=254,4 Ref=360,100

| Peak # | RetTime [min] | Type | Width [min] | Area [mAU*s] | Height [mAU] | Area %  |
|--------|---------------|------|-------------|--------------|--------------|---------|
| 1      | 7.271         | BB   | 0.1783      | 592.31207    | 51.44891     | 49.0472 |
| 2      | 8.007         | BV   | 0.1981      | 615.32520    | 47.82840     | 50.9528 |

Totals :                                    1207.63727    99.27731

Sample Name:

```

=====
Acq. Operator   :                               Seq. Line :    8
Acq. Instrument : Instrument 1                 Location  : Vial 32
Injection Date  : 4/12/2016 5:16:25 PM        Inj       :    1
                                                Inj Volume: 5.000 µl

Acq. Method    : C:\CHEM32\1\DATA\DEF_LC 2016-04-12 14-34-50\AD-10-20.M
Last changed   : 11/28/2014 10:15:17 AM
Analysis Method: C:\CHEM32\1\METHODS\AD-01-10-2.0.M
Last changed   : 6/26/2016 4:17:43 PM
                (modified after loading)
Additional Info : Peak(s) manually integrated
  
```

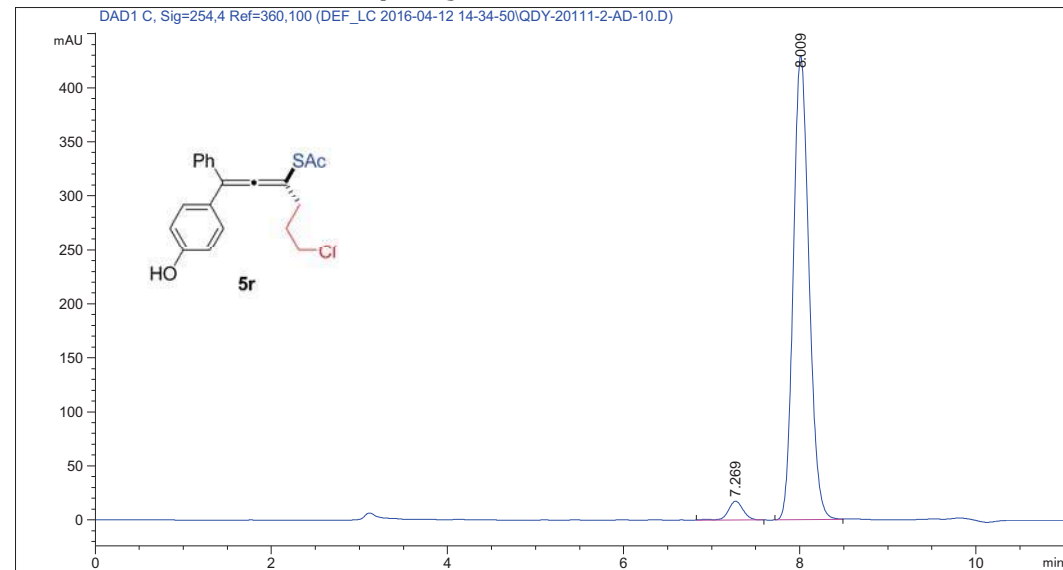

```

=====
Area Percent Report
=====
  
```

```

Sorted By      :      Signal
Multiplier     :      1.0000
Dilution      :      1.0000
Use Multiplier & Dilution Factor with ISTDs
  
```

Signal 1: DAD1 C, Sig=254,4 Ref=360,100

| Peak # | RetTime [min] | Type | Width [min] | Area [mAU*s] | Height [mAU] | Area %  |
|--------|---------------|------|-------------|--------------|--------------|---------|
| 1      | 7.269         | BB   | 0.1810      | 204.44051    | 17.41126     | 3.7023  |
| 2      | 8.009         | BB   | 0.1925      | 5317.61865   | 429.46994    | 96.2977 |

Totals :                                    5522.05916    446.88120

## Supplementary Figure 205. HPLC spectrum for 5r

Sample Name:

```

=====
Acq. Operator   :                               Seq. Line :    7
Acq. Instrument : Instrument 1                 Location  : Vial 32
Injection Date  : 4/23/2016 2:07:44 AM        Inj       :    1
                                                Inj Volume: 5.000 µl

Acq. Method    : C:\CHEM32\1\DATA\DEF_LC 2016-04-23 00-18-02\AD-10-30.M
Last changed   : 11/30/2015 12:57:24 PM
Analysis Method: C:\CHEM32\1\METHODS\AD-01-10-2.0.M
Last changed   : 6/26/2016 1:41:03 PM
                (modified after loading)
Additional Info: Peak(s) manually integrated
  
```

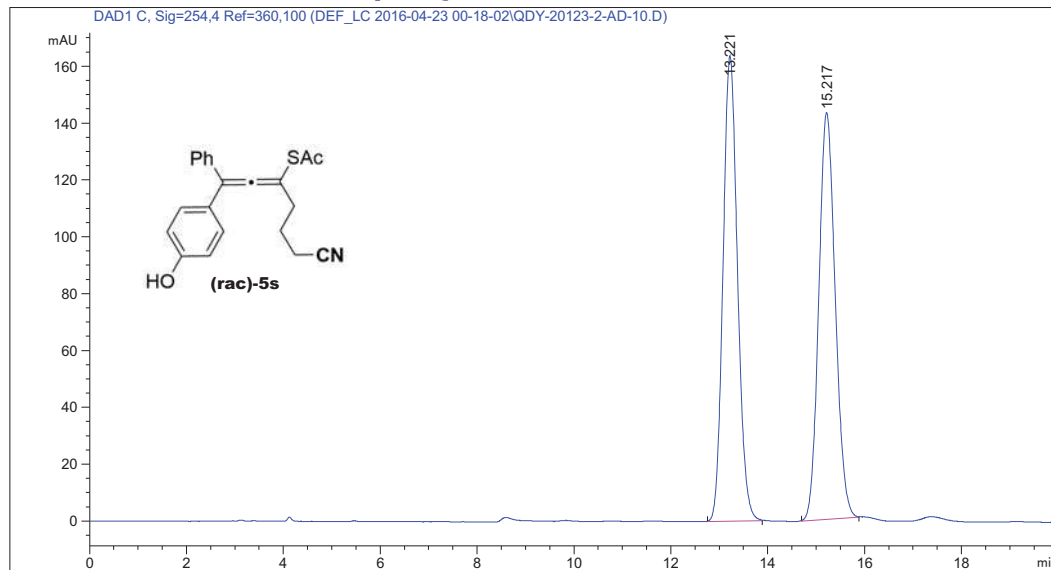

```

=====
Area Percent Report
=====
  
```

```

Sorted By      :      Signal
Multiplier     :      1.0000
Dilution      :      1.0000
Use Multiplier & Dilution Factor with ISTDs
  
```

Signal 1: DAD1 C, Sig=254,4 Ref=360,100

| Peak # | RetTime [min] | Type | Width [min] | Area [mAU*s] | Height [mAU] | Area %  |
|--------|---------------|------|-------------|--------------|--------------|---------|
| 1      | 13.221        | BB   | 0.3219      | 3394.72974   | 163.70085    | 50.0480 |
| 2      | 15.217        | BB   | 0.3682      | 3388.21924   | 143.13855    | 49.9520 |

Totals :                    6782.94897   306.83940

## Supplementary Figure 206. HPLC spectrum for 5s

Sample Name:

```

=====
Acq. Operator   :                               Seq. Line :    2
Acq. Instrument : Instrument 1                 Location  : Vial 34
Injection Date  : 4/28/2016 11:51:09 PM        Inj       :    1
                                                Inj Volume: 5.000 µl

Acq. Method    : C:\CHEM32\1\DATA\DEF_LC 2016-04-28 23-38-49\AD-10-25.M
Last changed   : 4/28/2016 11:50:16 PM
                (modified after loading)
Analysis Method: C:\CHEM32\1\METHODS\IC-20-70.M
Last changed   : 6/18/2016 10:41:44 AM
                (modified after loading)
Additional Info: Peak(s) manually integrated
  
```

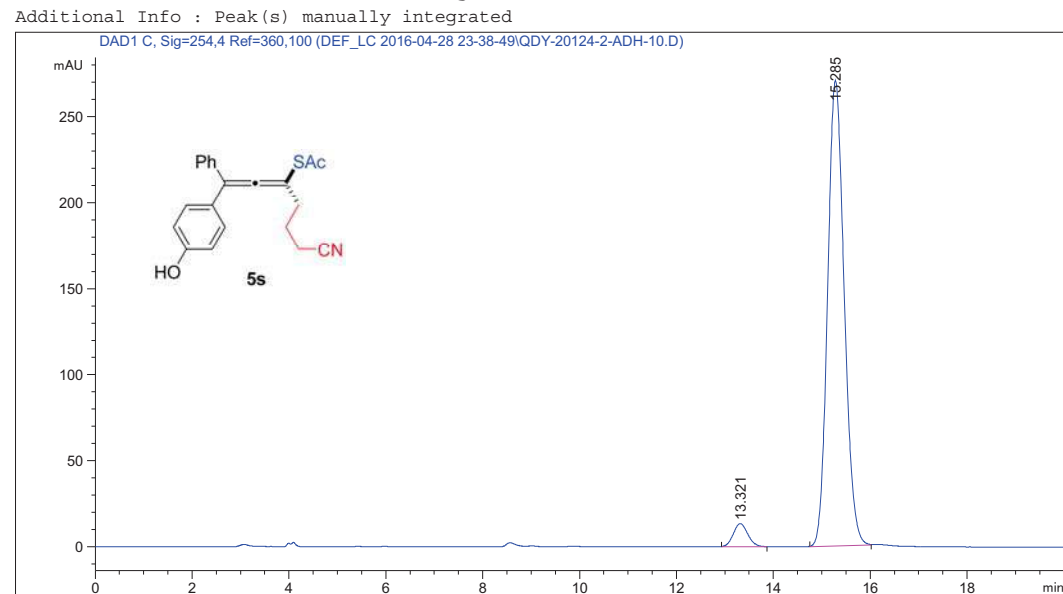

```

=====
Area Percent Report
=====
  
```

```

Sorted By      :      Signal
Multiplier     :      1.0000
Dilution      :      1.0000
Use Multiplier & Dilution Factor with ISTDs
  
```

Signal 1: DAD1 C, Sig=254,4 Ref=360,100

| Peak # | RetTime [min] | Type | Width [min] | Area [mAU*s] | Height [mAU] | Area %  |
|--------|---------------|------|-------------|--------------|--------------|---------|
| 1      | 13.321        | BB   | 0.3241      | 282.51279    | 13.50160     | 4.2193  |
| 2      | 15.285        | BB   | 0.3685      | 6413.16797   | 270.58994    | 95.7807 |

Totals :                    6695.68076   284.09153

Sample Name:

```

=====
Acq. Operator   :                               Seq. Line :   45
Acq. Instrument : Instrument 1                 Location  : Vial 32
Injection Date  : 4/6/2016 11:40:19 PM        Inj       :    1
                                                Inj Volume: 5.000 µl

Acq. Method    : C:\CHEM32\1\DATA\DEF_LC 2016-04-06 09-31-16\AD-03-30.M
Last changed   : 1/30/2015 10:17:06 AM
Analysis Method : C:\CHEM32\1\METHODS\AD-01-10-2.0.M
Last changed   : 6/28/2016 11:26:02 AM
                (modified after loading)
Additional Info : Peak(s) manually integrated
  
```

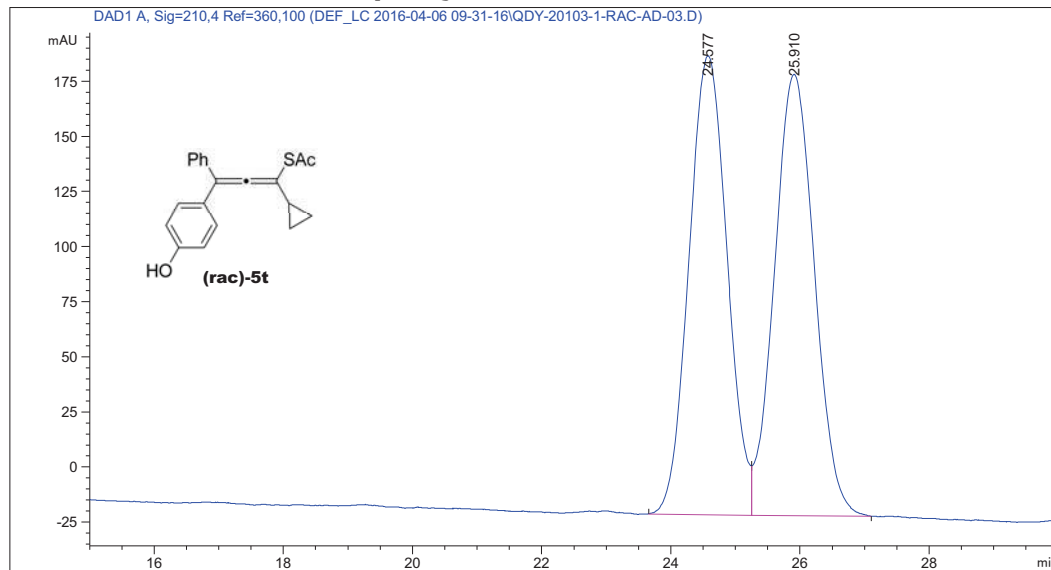

```

=====
Area Percent Report
=====
  
```

```

Sorted By      :      Signal
Multiplier     :      1.0000
Dilution      :      1.0000
Use Multiplier & Dilution Factor with ISTDs
  
```

Signal 1: DAD1 A, Sig=210,4 Ref=360,100

| Peak # | RetTime [min] | Type | Width [min] | Area [mAU*s] | Height [mAU] | Area %  |
|--------|---------------|------|-------------|--------------|--------------|---------|
| 1      | 24.577        | BV   | 0.6475      | 8555.16602   | 208.15483    | 49.7271 |
| 2      | 25.910        | VB   | 0.6621      | 8649.06543   | 200.16136    | 50.2729 |

Totals :                    1.72042e4    408.31619

### Supplementary Figure 207. HPLC spectrum for 5t

Sample Name:

```

=====
Acq. Operator   :                               Seq. Line :    6
Acq. Instrument : Instrument 1                 Location  : Vial 31
Injection Date  : 4/1/2016 4:59:28 PM        Inj       :    1
                                                Inj Volume: 5.000 µl

Different Inj Volume from Sequence ! Actual Inj Volume : 6.000 µl
Acq. Method    : C:\CHEM32\1\DATA\DEF_LC 2016-04-01 15-35-39\AD-03-30.M
Last changed   : 1/30/2015 10:17:06 AM
Analysis Method : C:\CHEM32\1\METHODS\AD-01-10-2.0.M
Last changed   : 6/28/2016 11:20:17 AM
                (modified after loading)
Additional Info : Peak(s) manually integrated
  
```

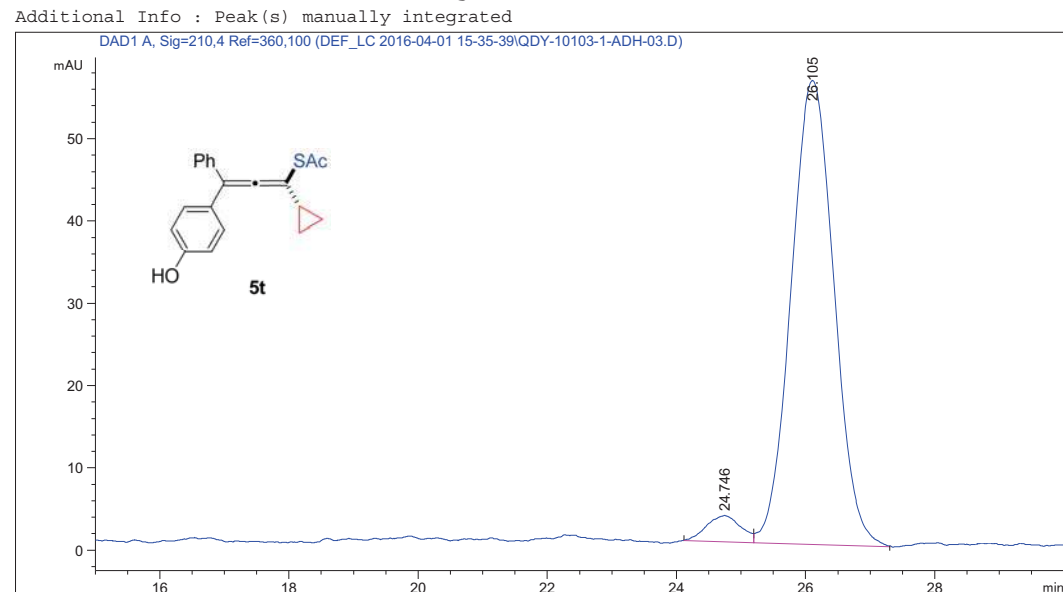

```

=====
Area Percent Report
=====
  
```

```

Sorted By      :      Signal
Multiplier     :      1.0000
Dilution      :      1.0000
Use Multiplier & Dilution Factor with ISTDs
  
```

Signal 1: DAD1 A, Sig=210,4 Ref=360,100

| Peak # | RetTime [min] | Type | Width [min] | Area [mAU*s] | Height [mAU] | Area %  |
|--------|---------------|------|-------------|--------------|--------------|---------|
| 1      | 24.746        | BV   | 0.4412      | 117.73360    | 3.20055      | 4.3359  |
| 2      | 26.105        | VB   | 0.6777      | 2597.57642   | 56.36382     | 95.6641 |

Totals :                    2715.31002    59.56437

Sample Name:

```

=====
Acq. Operator   :                               Seq. Line :    5
Acq. Instrument : Instrument 1                  Location  : Vial 31
Injection Date  : 4/1/2016 12:08:16 AM         Inj       :    1
                                                Inj Volume: 5.000 µl

Acq. Method    : C:\CHEM32\1\DATA\DEF_LC 2016-03-31 22-59-06\AD-02-20.M
Last changed   : 4/1/2016 12:19:44 AM
                (modified after loading)
Analysis Method: C:\CHEM32\1\METHODS\AD-01-10-2.0.M
Last changed   : 6/26/2016 4:00:03 PM
                (modified after loading)
Additional Info : Peak(s) manually integrated
    
```

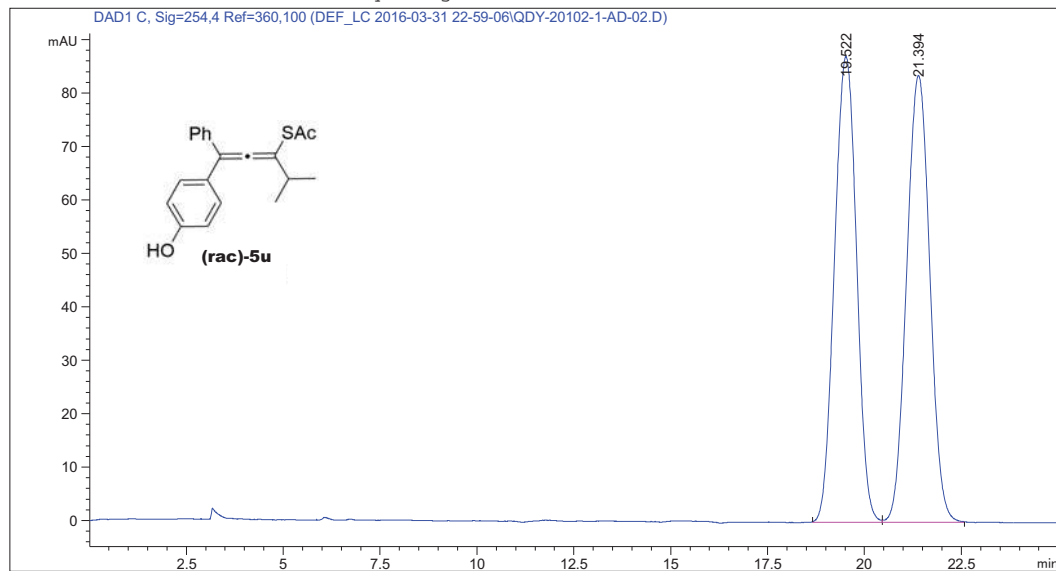

Area Percent Report

```

Sorted By      :      Signal
Multiplier     :      1.0000
Dilution       :      1.0000
Use Multiplier & Dilution Factor with ISTDs
    
```

Signal 1: DAD1 C, Sig=254,4 Ref=360,100

| Peak # | RetTime [min] | Type | Width [min] | Area [mAU*s] | Height [mAU] | Area %  |
|--------|---------------|------|-------------|--------------|--------------|---------|
| 1      | 19.522        | BV   | 0.6306      | 3440.79224   | 87.14542     | 49.7928 |
| 2      | 21.394        | VB   | 0.6621      | 3469.42822   | 83.61929     | 50.2072 |

Totals : 6910.22046 170.76472

Sample Name:

```

=====
Acq. Operator   :                               Seq. Line :   55
Acq. Instrument : Instrument 1                  Location  : Vial 35
Injection Date  : 4/2/2016 12:03:22 PM         Inj       :    1
                                                Inj Volume: 5.000 µl

Acq. Method    : C:\CHEM32\1\DATA\DEF_LC 2016-04-01 15-35-39\AD-02-30.M
Last changed   : 2/4/2015 1:17:54 PM
Analysis Method: C:\CHEM32\1\METHODS\AD-01-10-2.0.M
Last changed   : 6/26/2016 4:03:06 PM
                (modified after loading)
Additional Info : Peak(s) manually integrated
    
```

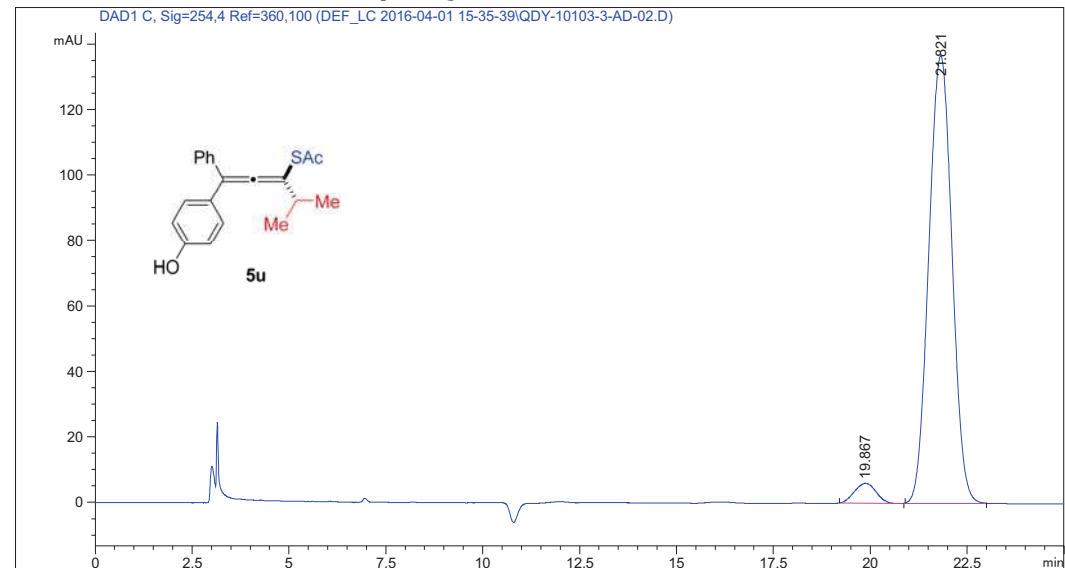

Area Percent Report

```

Sorted By      :      Signal
Multiplier     :      1.0000
Dilution       :      1.0000
Use Multiplier & Dilution Factor with ISTDs
    
```

Signal 1: DAD1 C, Sig=254,4 Ref=360,100

| Peak # | RetTime [min] | Type | Width [min] | Area [mAU*s] | Height [mAU] | Area %  |
|--------|---------------|------|-------------|--------------|--------------|---------|
| 1      | 19.867        | BB   | 0.5267      | 232.61073    | 6.04875      | 3.9310  |
| 2      | 21.821        | BB   | 0.6612      | 5684.76416   | 136.70180    | 96.0690 |

Totals : 5917.37489 142.75055

Supplementary Figure 208. HPLC spectrum for 5u

Sample Name:

```

=====
Acq. Operator   :                               Seq. Line :    6
Acq. Instrument : Instrument 1                 Location  : Vial 31
Injection Date  : 1/20/2016 5:56:11 PM        Inj       :    1
                                                Inj Volume: 5.000 µl

Acq. Method     : C:\CHEM32\1\DATA\DEF_LC 2016-01-20 16-36-43\AD-05-30.M
Last changed    : 1/20/2016 5:55:21 PM
                (modified after loading)
Analysis Method : C:\CHEM32\1\METHODS\AD-01-10-2.0.M
Last changed    : 6/26/2016 2:39:22 PM
                (modified after loading)
    
```

Additional Info : Peak(s) manually integrated

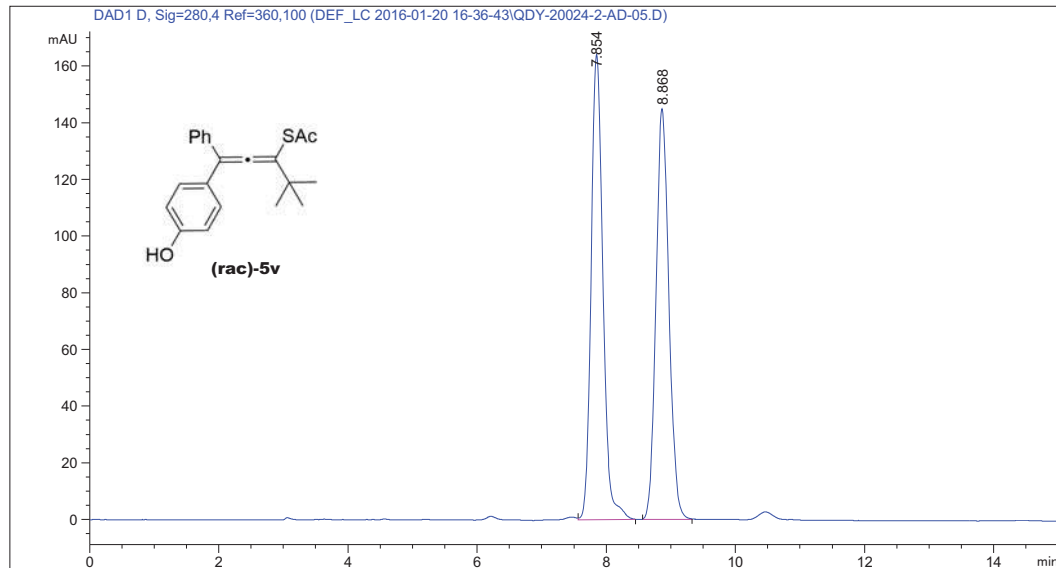

Area Percent Report

```

Sorted By      :      Signal
Multiplier     :      1.0000
Dilution       :      1.0000
Use Multiplier & Dilution Factor with ISTDs
    
```

Signal 1: DAD1 D, Sig=280,4 Ref=360,100

| Peak # | RetTime [min] | Type | Width [min] | Area [mAU*s] | Height [mAU] | Area %  |
|--------|---------------|------|-------------|--------------|--------------|---------|
| 1      | 7.854         | VB   | 0.1955      | 2075.83936   | 164.15967    | 50.7349 |
| 2      | 8.868         | BB   | 0.2163      | 2015.70105   | 144.91257    | 49.2651 |

Totals : 4091.54041 309.07224

Sample Name:

```

=====
Acq. Operator   :                               Seq. Line :    2
Acq. Instrument : Instrument 1                 Location  : Vial 31
Injection Date  : 3/25/2016 6:29:38 PM        Inj       :    1
                                                Inj Volume: 5.000 µl

Acq. Method     : C:\CHEM32\1\DATA\DEF_LC 2016-03-25 18-16-02\AD-05-20.M
Last changed    : 10/14/2015 3:51:32 PM
Analysis Method : C:\CHEM32\1\METHODS\AD-01-10-2.0.M
Last changed    : 6/26/2016 2:39:22 PM
                (modified after loading)
    
```

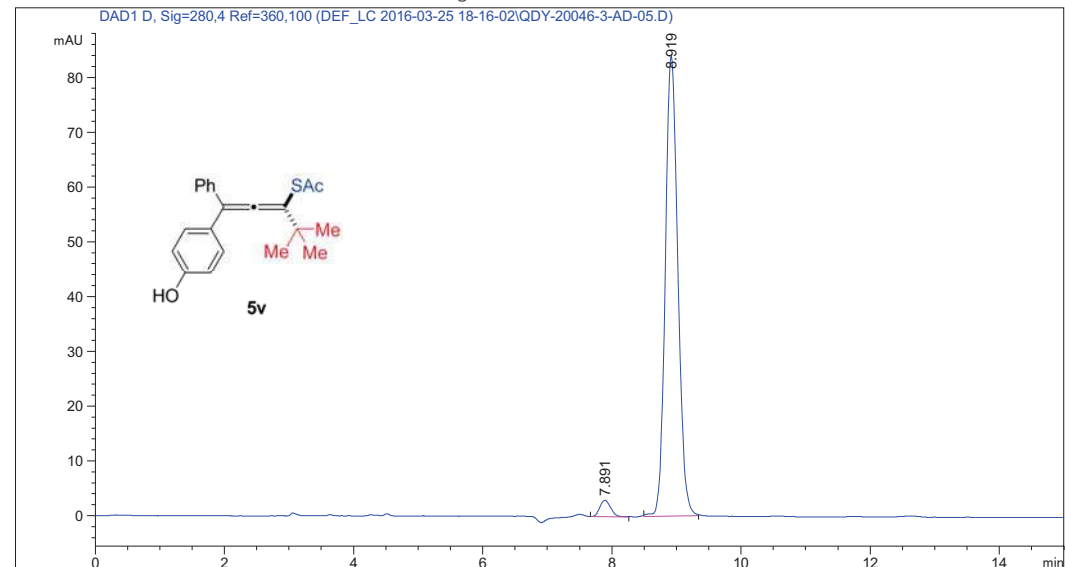

Area Percent Report

```

Sorted By      :      Signal
Multiplier     :      1.0000
Dilution       :      1.0000
Use Multiplier & Dilution Factor with ISTDs
    
```

Signal 1: DAD1 D, Sig=280,4 Ref=360,100

| Peak # | RetTime [min] | Type | Width [min] | Area [mAU*s] | Height [mAU] | Area %  |
|--------|---------------|------|-------------|--------------|--------------|---------|
| 1      | 7.891         | BB   | 0.1840      | 35.07615     | 3.00973      | 3.0115  |
| 2      | 8.919         | BB   | 0.2069      | 1129.64929   | 83.97672     | 96.9885 |

Totals : 1164.72544 86.98645

Supplementary Figure 209. HPLC spectrum for 5v

\*\*\* End of Report \*\*\*

Sample Name:

```

=====
Acq. Operator   :                               Seq. Line :   19
Acq. Instrument : Instrument 1                 Location  : Vial 34
Injection Date  : 3/5/2016 8:13:02 PM         Inj       :    1
                                                Inj Volume: 5.000 µl

Acq. Method    : C:\CHEM32\1\DATA\DEF_LC 2016-03-05 14-20-31\AD-20-30.M
Last changed   : 3/5/2016 8:29:34 PM
                (modified after loading)

Analysis Method: C:\CHEM32\1\METHODS\AD-01-10-2.0.M
Last changed   : 6/26/2016 2:50:44 PM
                (modified after loading)

Additional Info : Peak(s) manually integrated
    
```

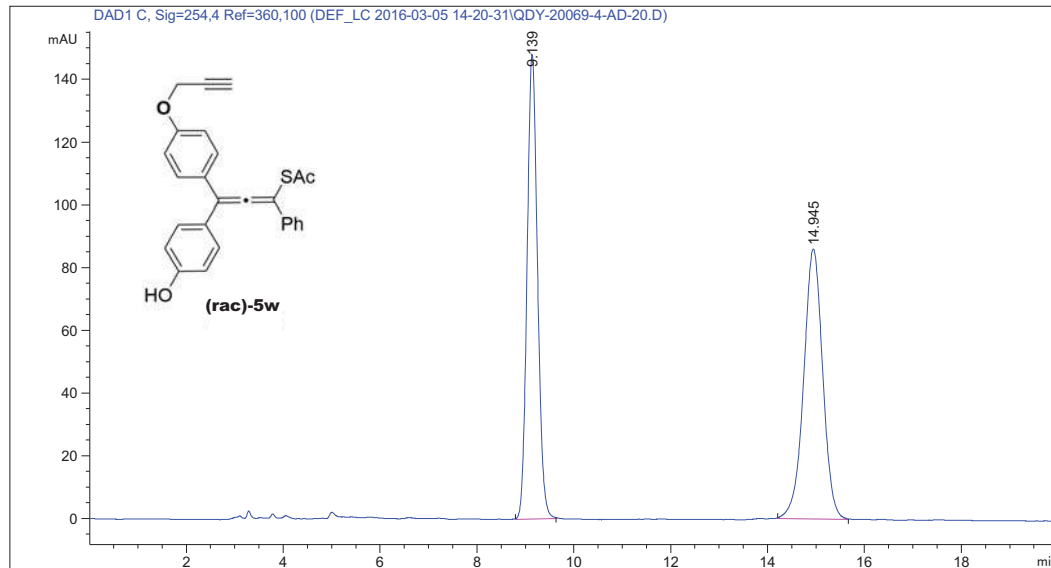

Area Percent Report

```

Sorted By      :      Signal
Multiplier     :      1.0000
Dilution       :      1.0000
Use Multiplier & Dilution Factor with ISTDs
    
```

Signal 1: DAD1 C, Sig=254,4 Ref=360,100

| Peak # | RetTime [min] | Type | Width [min] | Area [mAU*s] | Height [mAU] | Area %  |
|--------|---------------|------|-------------|--------------|--------------|---------|
| 1      | 9.139         | BB   | 0.2304      | 2214.57837   | 148.15285    | 48.5121 |
| 2      | 14.945        | BB   | 0.4185      | 2350.42090   | 86.10274     | 51.4879 |

Totals : 4564.99927 234.25558

Sample Name:

```

=====
Acq. Operator   :                               Seq. Line :   14
Acq. Instrument : Instrument 1                 Location  : Vial 36
Injection Date  : 4/29/2016 11:17:11 PM      Inj       :    1
                                                Inj Volume: 5.000 µl

Acq. Method    : C:\CHEM32\1\DATA\DEF_LC 2016-04-29 18-48-49\AD-20-20.M
Last changed   : 4/29/2016 10:34:02 PM
                (modified after loading)

Analysis Method: C:\CHEM32\1\METHODS\AD-01-10-2.0.M
Last changed   : 6/26/2016 2:50:44 PM
                (modified after loading)

Additional Info : Peak(s) manually integrated
    
```

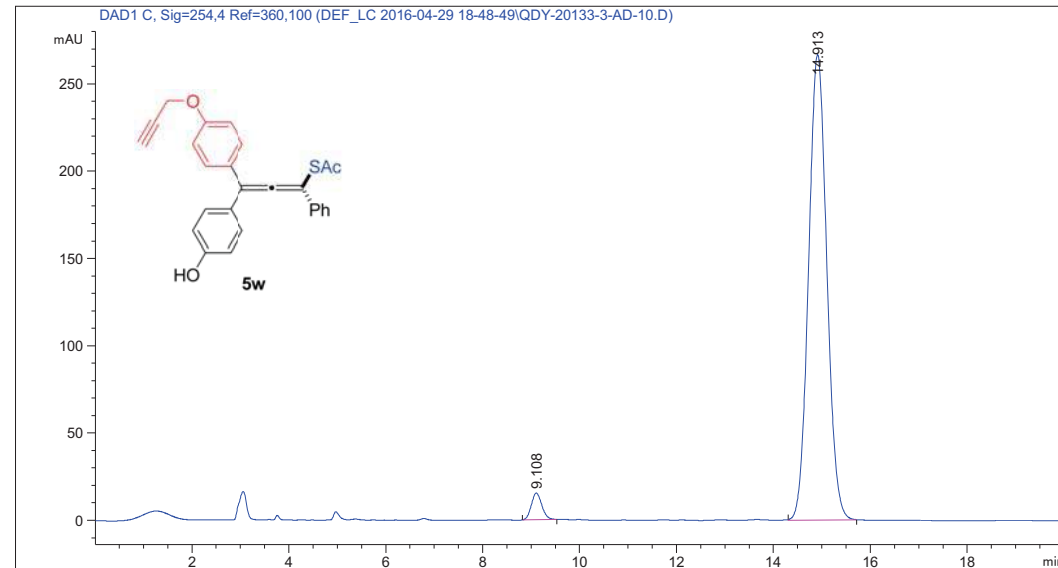

Area Percent Report

```

Sorted By      :      Signal
Multiplier     :      1.0000
Dilution       :      1.0000
Use Multiplier & Dilution Factor with ISTDs
    
```

Signal 1: DAD1 C, Sig=254,4 Ref=360,100

| Peak # | RetTime [min] | Type | Width [min] | Area [mAU*s] | Height [mAU] | Area %  |
|--------|---------------|------|-------------|--------------|--------------|---------|
| 1      | 9.108         | BB   | 0.2353      | 233.07611    | 15.33749     | 3.2413  |
| 2      | 14.913        | BB   | 0.4063      | 6957.69434   | 266.73419    | 96.7587 |

Totals : 7190.77045 282.07168

**Supplementary Figure 210. HPLC spectrum for 5w**

Sample Name:

```

=====
Acq. Operator   :                               Seq. Line : 27
Acq. Instrument : Instrument 1                   Location  : Vial 32
Injection Date  : 4/28/2016 2:11:46 AM          Inj       : 1
                                                    Inj Volume: 5.000 µl

Acq. Method    : C:\CHEM32\1\DATA\DEF_LC 2016-04-27 16-08-08\AD-15-30.M
Last changed   : 4/28/2016 1:39:09 AM
                (modified after loading)

Analysis Method : C:\CHEM32\1\METHODS\AD-01-10-2.0.M
Last changed   : 6/26/2016 3:48:19 PM
                (modified after loading)

Additional Info : Peak(s) manually integrated
    
```

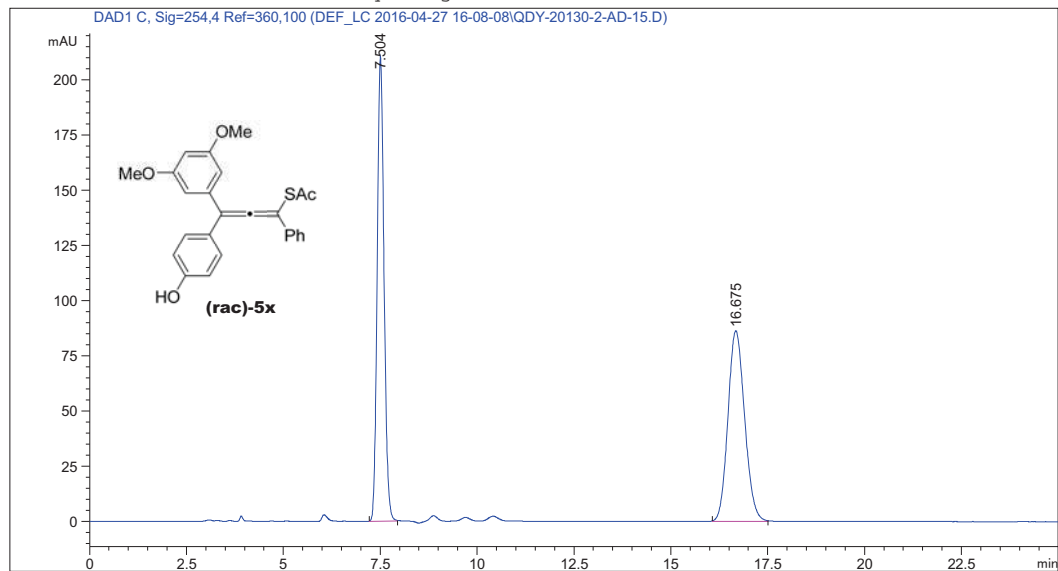

Area Percent Report

```

Sorted By      : Signal
Multiplier     : 1.0000
Dilution       : 1.0000
Use Multiplier & Dilution Factor with ISTDs
    
```

Signal 1: DAD1 C, Sig=254,4 Ref=360,100

| Peak # | RetTime [min] | Type | Width [min] | Area [mAU*s] | Height [mAU] | Area %  |
|--------|---------------|------|-------------|--------------|--------------|---------|
| 1      | 7.504         | BB   | 0.1895      | 2587.34521   | 210.38361    | 50.0512 |
| 2      | 16.675        | BB   | 0.4629      | 2582.05249   | 86.33402     | 49.9488 |

Totals : 5169.39771 296.71763

Sample Name:

```

=====
Acq. Operator   :                               Seq. Line : 7
Acq. Instrument : Instrument 1                   Location  : Vial 32
Injection Date  : 4/29/2016 1:42:50 AM          Inj       : 1
                                                    Inj Volume: 5.000 µl

Acq. Method    : C:\CHEM32\1\DATA\DEF_LC 2016-04-28 23-38-49\AD-15-30.M
Last changed   : 4/29/2016 1:41:58 AM
                (modified after loading)

Analysis Method : C:\CHEM32\1\METHODS\AD-01-10-2.0.M
Last changed   : 6/26/2016 3:48:19 PM
                (modified after loading)

Additional Info : Peak(s) manually integrated
    
```

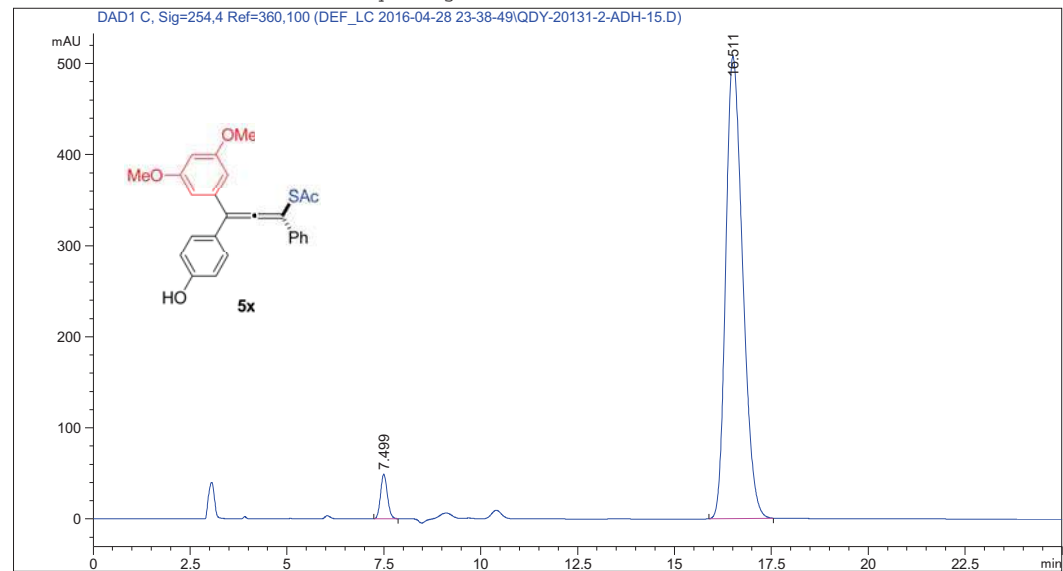

Area Percent Report

```

Sorted By      : Signal
Multiplier     : 1.0000
Dilution       : 1.0000
Use Multiplier & Dilution Factor with ISTDs
    
```

Signal 1: DAD1 C, Sig=254,4 Ref=360,100

| Peak # | RetTime [min] | Type | Width [min] | Area [mAU*s] | Height [mAU] | Area %  |
|--------|---------------|------|-------------|--------------|--------------|---------|
| 1      | 7.499         | BB   | 0.1892      | 601.64008    | 49.02268     | 3.7736  |
| 2      | 16.511        | BB   | 0.4687      | 1.53417e4    | 507.45258    | 96.2264 |

Totals : 1.59434e4 556.47525

**Supplementary Figure 211. HPLC spectrum for 5x**







Sample Name:

```

=====
Acq. Operator   :                               Seq. Line :    7
Acq. Instrument : Instrument 1                  Location  : Vial 33
Injection Date  : 6/23/2016 11:51:23 PM       Inj       :    1
                                                Inj Volume: 5.000 µl

Acq. Method    : C:\CHEM32\1\DATA\QDY 2016-06-23 22-12-46\OD-01-20-0.5.M
Last changed   : 6/23/2016 11:50:31 PM
                (modified after loading)
Analysis Method: C:\CHEM32\1\METHODS\AD-25-90.M
Last changed   : 6/24/2016 12:31:56 AM
                (modified after loading)
Additional Info : Peak(s) manually integrated
  
```

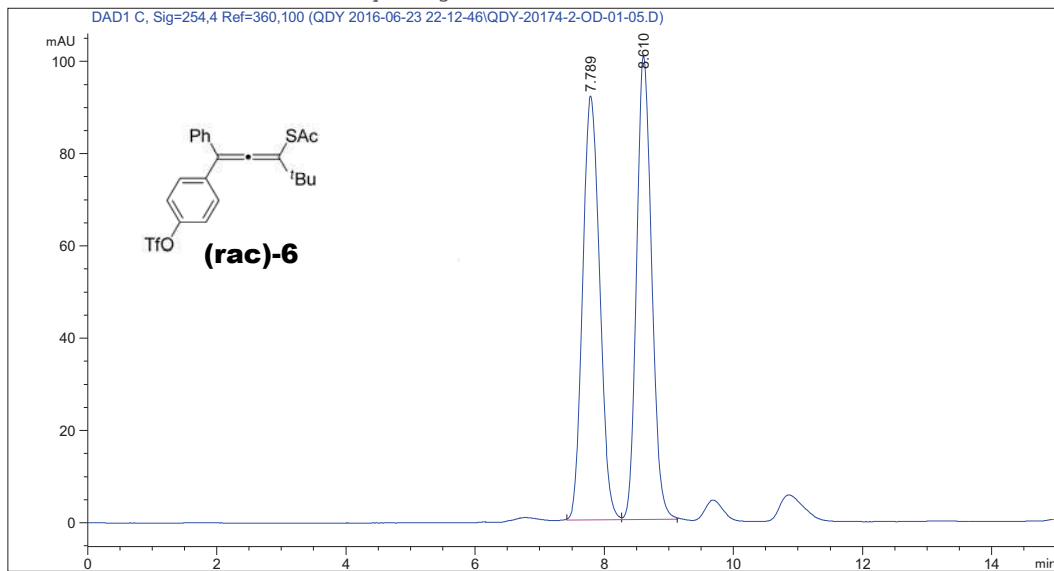

```

=====
Area Percent Report
=====
  
```

```

Sorted By      :      Signal
Multiplier     :      1.0000
Dilution       :      1.0000
Use Multiplier & Dilution Factor with ISTDs
  
```

Signal 1: DAD1 C, Sig=254,4 Ref=360,100

| Peak # | RetTime [min] | Type | Width [min] | Area [mAU*s] | Height [mAU] | Area %  |
|--------|---------------|------|-------------|--------------|--------------|---------|
| 1      | 7.789         | BV   | 0.2921      | 1686.98352   | 91.91465     | 50.7609 |
| 2      | 8.610         | VB   | 0.2561      | 1636.40552   | 100.41180    | 49.2391 |

Totals : 3323.38904 192.32645

### Supplementary Figure 214. HPLC spectrum for 6

Sample Name:

```

=====
Acq. Operator   :                               Seq. Line :    4
Acq. Instrument : Instrument 1                  Location  : Vial 32
Injection Date  : 6/23/2016 5:07:25 PM       Inj       :    1
                                                Inj Volume: 5.000 µl

Acq. Method    : C:\CHEM32\1\DATA\QDY 2016-06-23 16-11-05\OD-01-20-0.5.M
Last changed   : 6/23/2016 5:06:32 PM
                (modified after loading)
Analysis Method: C:\CHEM32\1\METHODS\AD-25-90.M
Last changed   : 6/23/2016 11:05:26 PM
                (modified after loading)
Additional Info : Peak(s) manually integrated
  
```

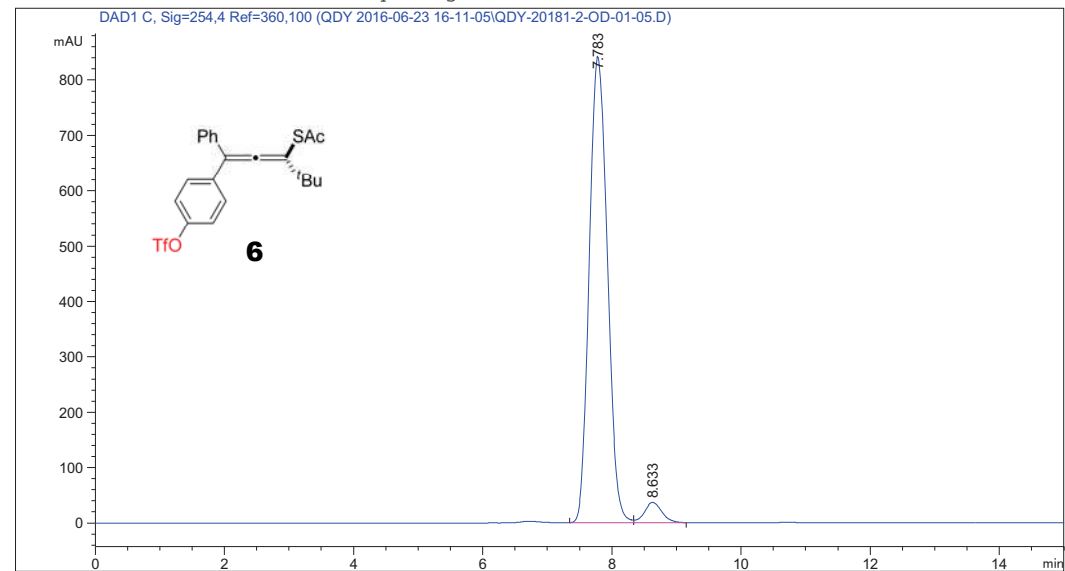

```

=====
Area Percent Report
=====
  
```

```

Sorted By      :      Signal
Multiplier     :      1.0000
Dilution       :      1.0000
Use Multiplier & Dilution Factor with ISTDs
  
```

Signal 1: DAD1 C, Sig=254,4 Ref=360,100

| Peak # | RetTime [min] | Type | Width [min] | Area [mAU*s] | Height [mAU] | Area %  |
|--------|---------------|------|-------------|--------------|--------------|---------|
| 1      | 7.783         | BV   | 0.3130      | 1.63889e4    | 842.21082    | 95.9034 |
| 2      | 8.633         | VB   | 0.2896      | 700.05945    | 36.86123     | 4.0966  |

Totals : 1.70890e4 879.07204

Sample Name:

```

=====
Acq. Operator   :                               Seq. Line :    2
Acq. Instrument : Instrument 1                   Location  : Vial 33
Injection Date  : 6/20/2016 10:47:22 PM         Inj       :    1
                                                    Inj Volume: 5.000 µl
Different Inj Volume from Sequence ! Actual Inj Volume : 10.000 µl
Acq. Method    : C:\CHEM32\1\DATA\QDY 2016-06-20 22-33-20\AD-05-30.M
Last changed   : 6/20/2016 10:59:56 PM
                (modified after loading)
Analysis Method : C:\CHEM32\1\METHODS\AD-01-10-2.0.M
Last changed   : 6/26/2016 1:59:23 PM
                (modified after loading)
Additional Info : Peak(s) manually integrated
  
```

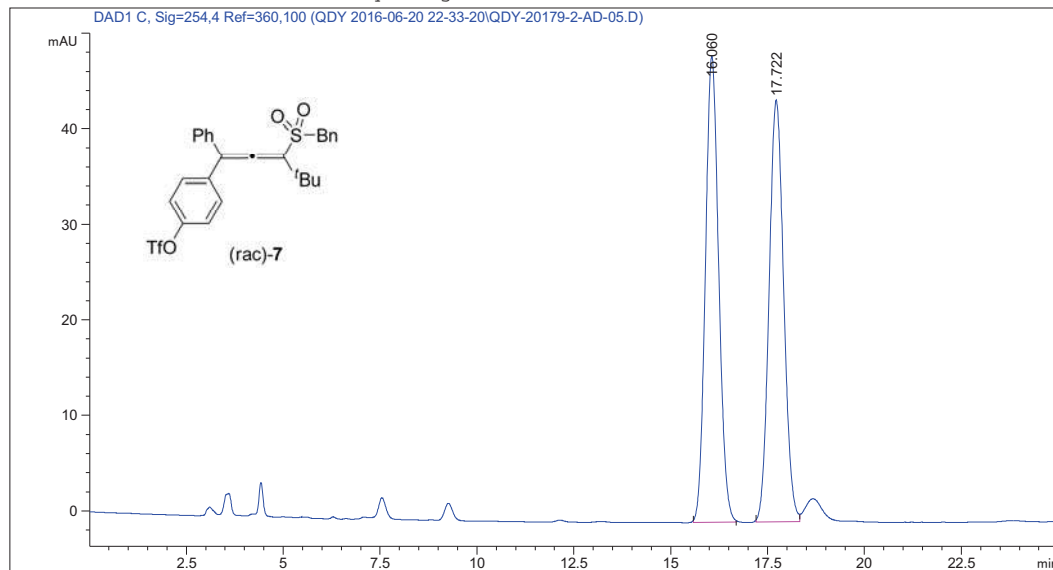

```

=====
Area Percent Report
=====
  
```

```

Sorted By      : Signal
Multiplier     : 1.0000
Dilution       : 1.0000
Use Multiplier & Dilution Factor with ISTDs
  
```

Signal 1: DAD1 C, Sig=254,4 Ref=360,100

| Peak # | RetTime [min] | Type | Width [min] | Area [mAU*s] | Height [mAU] | Area %  |
|--------|---------------|------|-------------|--------------|--------------|---------|
| 1      | 16.060        | BB   | 0.3694      | 1159.83057   | 48.78622     | 50.0884 |
| 2      | 17.722        | BV   | 0.4073      | 1155.73547   | 44.15915     | 49.9116 |

|          |  |  |  |            |          |  |
|----------|--|--|--|------------|----------|--|
| Totals : |  |  |  | 2315.56604 | 92.94537 |  |
|----------|--|--|--|------------|----------|--|

Sample Name:

```

=====
Acq. Operator   :                               Seq. Line :    3
Acq. Instrument : Instrument 1                   Location  : Vial 32
Injection Date  : 6/25/2016 3:17:25 PM         Inj       :    1
                                                    Inj Volume: 5.000 µl
Different Inj Volume from Sequence ! Actual Inj Volume : 3.000 µl
Acq. Method    : C:\CHEM32\1\DATA\QDY 2016-06-25 14-37-21\AD-05-30.M
Last changed   : 6/25/2016 2:57:48 PM
                (modified after loading)
Analysis Method : C:\CHEM32\1\METHODS\AD-01-10-2.0.M
Last changed   : 6/26/2016 1:59:23 PM
                (modified after loading)
Additional Info : Peak(s) manually integrated
  
```

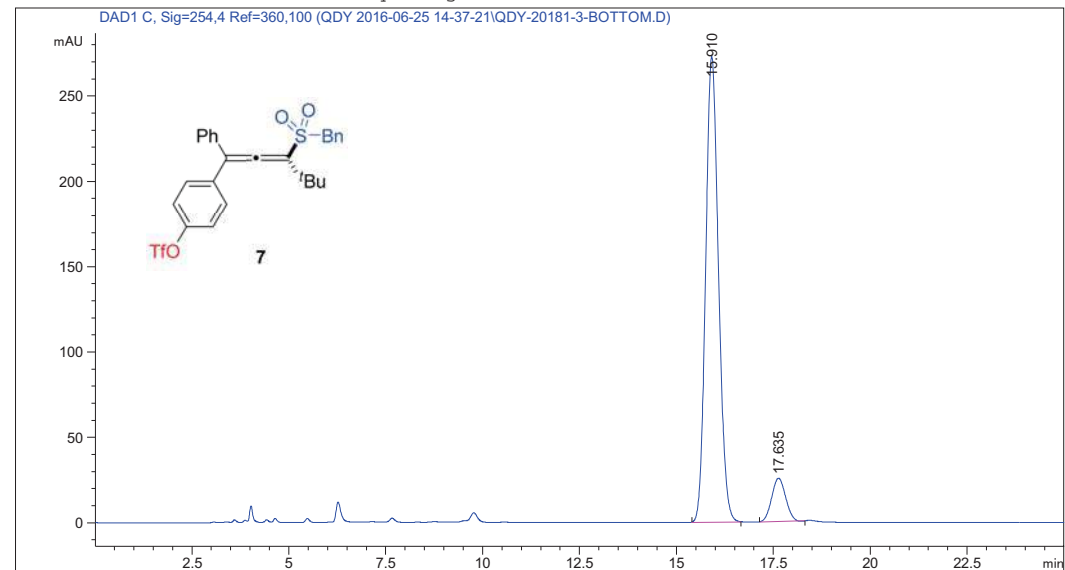

```

=====
Area Percent Report
=====
  
```

```

Sorted By      : Signal
Multiplier     : 1.0000
Dilution       : 1.0000
Use Multiplier & Dilution Factor with ISTDs
  
```

Signal 1: DAD1 C, Sig=254,4 Ref=360,100

| Peak # | RetTime [min] | Type | Width [min] | Area [mAU*s] | Height [mAU] | Area %  |
|--------|---------------|------|-------------|--------------|--------------|---------|
| 1      | 15.910        | BB   | 0.3581      | 6275.77734   | 273.06549    | 90.8933 |
| 2      | 17.635        | BB   | 0.3896      | 628.77716    | 25.33145     | 9.1067  |

|          |  |  |  |            |           |  |
|----------|--|--|--|------------|-----------|--|
| Totals : |  |  |  | 6904.55450 | 298.39694 |  |
|----------|--|--|--|------------|-----------|--|

### Supplementary Figure 215. HPLC spectrum for 7

Acq. Operator : Seq. Line : 12  
 Acq. Instrument : Instrument 1 Location : Vial 31  
 Injection Date : 1/13/2017 2:11:06 PM Inj : 1  
 Inj Volume : 5.000 µl  
 Acq. Method : C:\CHEM32\1\DATA\QDY 2017-01-13 10-06-53\AD-05-20.M  
 Last changed : 1/13/2017 2:10:15 PM  
 (modified after loading)  
 Analysis Method : C:\CHEM32\1\METHODS\ETOH-IC-01-25-05.M  
 Last changed : 1/15/2017 4:11:48 PM  
 (modified after loading)

Additional Info : Peak(s) manually integrated

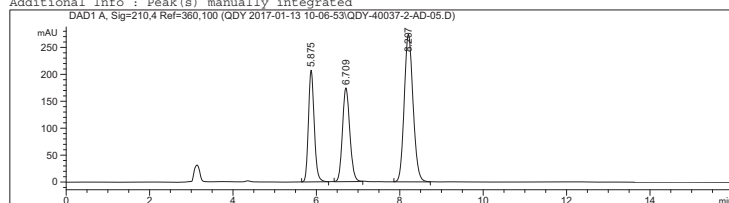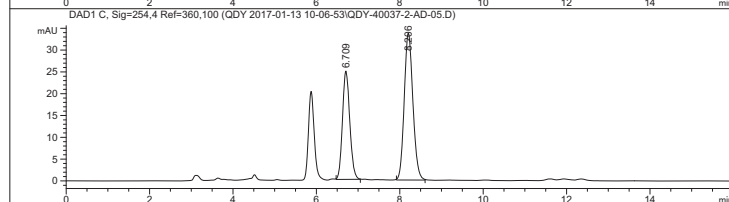

Area Percent Report

Sorted By : Signal  
 Multiplier : 1.0000  
 Dilution : 1.0000  
 Use Multiplier & Dilution Factor with ISTDs

Signal 1: DAD1 A, Sig=210.4 Ref=360,100

| Peak # | RetTime [min] | Type | Width [min] | Area [mAU*s] | Height [mAU] | Area %  |
|--------|---------------|------|-------------|--------------|--------------|---------|
| 1      | 5.875         | BB   | 0.1481      | 1992.61841   | 207.29070    | 24.4290 |
| 2      | 6.709         | BB   | 0.1912      | 2136.81909   | 174.07649    | 26.1968 |
| 3      | 8.207         | BB   | 0.2275      | 4027.34155   | 273.93179    | 49.3742 |

Totals : 8156.77905 655.29898

Signal 2: DAD1 C, Sig=254,4 Ref=360,100

| Peak # | RetTime [min] | Type | Width [min] | Area [mAU*s] | Height [mAU] | Area %  |
|--------|---------------|------|-------------|--------------|--------------|---------|
| 1      | 6.709         | BB   | 0.1883      | 302.87158    | 24.83160     | 38.4254 |
| 2      | 8.206         | BB   | 0.2240      | 485.33475    | 33.69499     | 61.5746 |

Totals : 788.20633 58.52659

\*\*\* End of Report \*\*\*

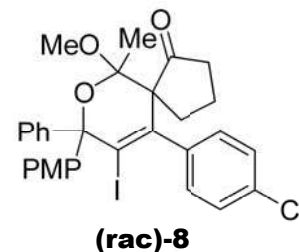

Acq. Operator : Seq. Line : 32  
 Acq. Instrument : Instrument 1 Location : Vial 33  
 Injection Date : 1/13/2017 8:13:46 PM Inj : 1  
 Inj Volume : 5.000 µl  
 Acq. Method : C:\CHEM32\1\DATA\QDY 2017-01-13 10-06-53\AD-05-20.M  
 Last changed : 10/14/2015 3:51:32 PM  
 Analysis Method : C:\CHEM32\1\METHODS\ETOH-IC-01-25-05.M  
 Last changed : 1/15/2017 4:11:48 PM  
 (modified after loading)

Additional Info : Peak(s) manually integrated

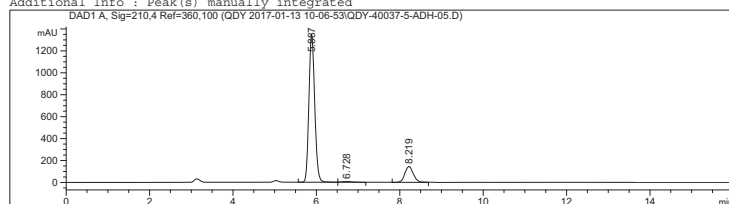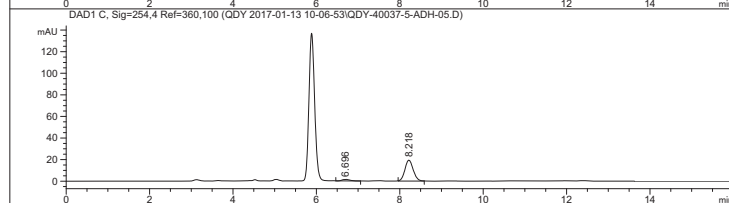

Area Percent Report

Sorted By : Signal  
 Multiplier : 1.0000  
 Dilution : 1.0000  
 Use Multiplier & Dilution Factor with ISTDs

Signal 1: DAD1 A, Sig=210.4 Ref=360,100

| Peak # | RetTime [min] | Type | Width [min] | Area [mAU*s] | Height [mAU] | Area %  |
|--------|---------------|------|-------------|--------------|--------------|---------|
| 1      | 5.887         | BB   | 0.1505      | 1.29937e4    | 1347.09326   | 85.8763 |
| 2      | 6.728         | BB   | 0.2030      | 110.11534    | 8.28580      | 0.7278  |
| 3      | 8.219         | VB   | 0.2175      | 2026.89929   | 144.63719    | 13.3959 |

Totals : 1.51307e4 1500.01626

Signal 2: DAD1 C, Sig=254,4 Ref=360,100

| Peak # | RetTime [min] | Type | Width [min] | Area [mAU*s] | Height [mAU] | Area %  |
|--------|---------------|------|-------------|--------------|--------------|---------|
| 1      | 6.696         | BB   | 0.2009      | 17.99112     | 1.42895      | 6.2794  |
| 2      | 8.218         | BB   | 0.2132      | 268.51770    | 19.43753     | 93.7206 |

Totals : 286.50882 20.86649

\*\*\* End of Report \*\*\*

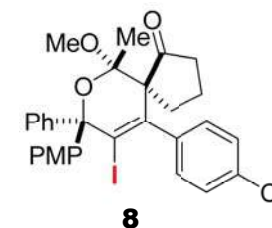

**Supplementary Figure 216. HPLC spectrum for 8 (AD)**

Acq. Operator : Seq. Line : 2  
 Acq. Instrument : Instrument 1 Location : Vial 31  
 Injection Date : 1/13/2017 11:40:24 PM Inj : 1  
 Inj Volume : 5.000 µl  
 Acq. Method : C:\CHEM32\1\DATA\QDY 2017-01-13 23-25-59\IC-05-25-05.M  
 Last changed : 1/13/2017 11:22:04 PM  
 Analysis Method : C:\CHEM32\1\METHODS\ETOH-IC-01-25-05.M  
 Last changed : 1/15/2017 4:07:21 PM  
 (modified after loading)

Additional Info : Peak(s) manually integrated

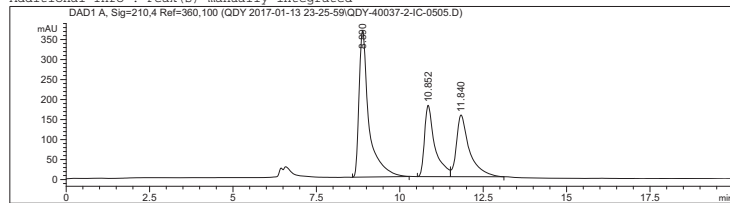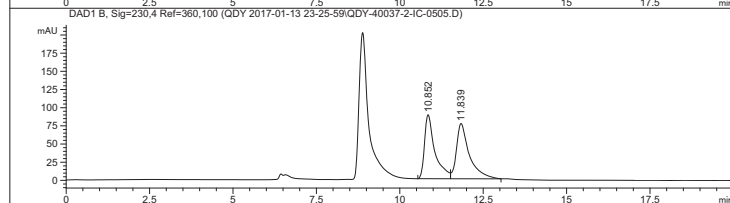

Area Percent Report

Sorted By : Signal  
 Multiplier : 1.0000  
 Dilution : 1.0000  
 Use Multiplier & Dilution Factor with ISTDs

Signal 1: DAD1 A, Sig=210,4 Ref=360,100

| Peak # | RetTime [min] | Type | Width [min] | Area [mAU*s] | Height [mAU] | Area %  |
|--------|---------------|------|-------------|--------------|--------------|---------|
| 1      | 8.890         | BB   | 0.3003      | 7469.63574   | 365.63831    | 48.1861 |
| 2      | 10.852        | BV   | 0.3130      | 3867.48804   | 178.32393    | 24.9489 |
| 3      | 11.840        | VB   | 0.3852      | 4164.50977   | 154.16713    | 26.8650 |

Totals : 1.55016e4 698.12936

Signal 2: DAD1 B, Sig=230,4 Ref=360,100

| Peak # | RetTime [min] | Type | Width [min] | Area [mAU*s] | Height [mAU] | Area %  |
|--------|---------------|------|-------------|--------------|--------------|---------|
| 1      | 10.852        | BV   | 0.3127      | 1905.97717   | 87.99619     | 48.2916 |
| 2      | 11.839        | VB   | 0.3832      | 2040.83240   | 76.01822     | 51.7084 |

Totals : 3946.80957 164.01440

\*\*\* End of Report \*\*\*

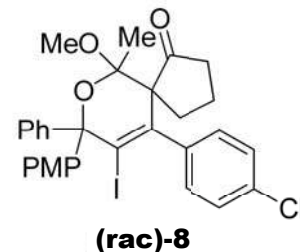

Acq. Operator : Seq. Line : 3  
 Acq. Instrument : Instrument 1 Location : Vial 33  
 Injection Date : 1/14/2017 12:06:40 AM Inj : 1  
 Inj Volume : 5.000 µl  
 Acq. Method : C:\CHEM32\1\DATA\QDY 2017-01-13 23-25-59\IC-05-25-05.M  
 Last changed : 1/13/2017 11:22:04 PM  
 Analysis Method : C:\CHEM32\1\METHODS\ETOH-IC-01-25-05.M  
 Last changed : 1/15/2017 4:07:21 PM  
 (modified after loading)

Additional Info : Peak(s) manually integrated

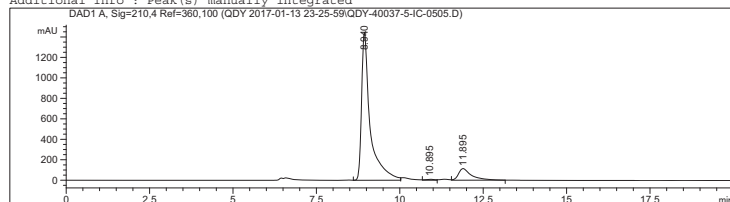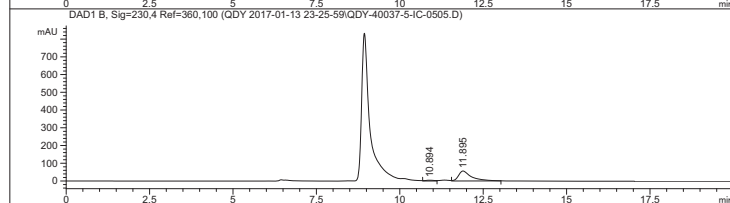

Area Percent Report

Sorted By : Signal  
 Multiplier : 1.0000  
 Dilution : 1.0000  
 Use Multiplier & Dilution Factor with ISTDs

Signal 1: DAD1 A, Sig=210,4 Ref=360,100

| Peak # | RetTime [min] | Type | Width [min] | Area [mAU*s] | Height [mAU] | Area %  |
|--------|---------------|------|-------------|--------------|--------------|---------|
| 1      | 8.940         | VV   | 0.2556      | 2.59539e4    | 1444.38599   | 88.9591 |
| 2      | 10.895        | VV   | 0.2718      | 167.76729    | 8.98649      | 0.5750  |
| 3      | 11.895        | VB   | 0.3894      | 3053.43042   | 113.65852    | 10.4659 |

Totals : 2.91751e4 1567.03100

Signal 2: DAD1 B, Sig=230,4 Ref=360,100

| Peak # | RetTime [min] | Type | Width [min] | Area [mAU*s] | Height [mAU] | Area %  |
|--------|---------------|------|-------------|--------------|--------------|---------|
| 1      | 10.894        | BV   | 0.2714      | 84.35708     | 4.52643      | 5.3166  |
| 2      | 11.895        | VB   | 0.3883      | 1502.31970   | 56.11365     | 94.6834 |

Totals : 1586.67678 60.64008

\*\*\* End of Report \*\*\*

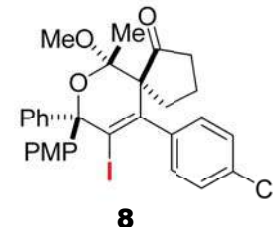

**Supplementary Figure 217. HPLC spectrum for 8 (IC)**

Sample Name:

```

=====
Acq. Operator   :                               Seq. Line :   38
Acq. Instrument : Instrument 1                 Location  : Vial 32
Injection Date  : 5/13/2016 1:51:46 AM        Inj       :    1
                                                Inj Volume: 5.000 µl

Acq. Method    : C:\CHEM32\1\DATA\DEF_LC 2016-05-12 13-40-59\AD-05-20.M
Last changed   : 10/14/2015 3:51:32 PM
Analysis Method: C:\CHEM32\1\METHODS\AD-01-10-2.0.M
Last changed   : 6/26/2016 2:05:13 PM
                (modified after loading)
Additional Info: Peak(s) manually integrated
    
```

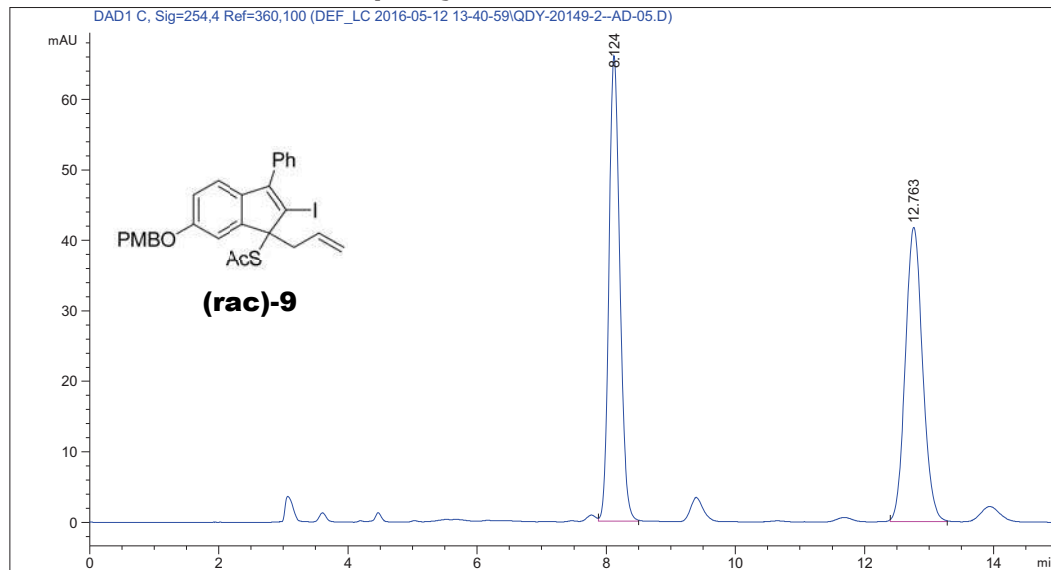

Area Percent Report

```

=====
Sorted By      :      Signal
Multiplier     :      1.0000
Dilution      :      1.0000
Use Multiplier & Dilution Factor with ISTDs
    
```

Signal 1: DAD1 C, Sig=254,4 Ref=360,100

| Peak # | RetTime [min] | Type | Width [min] | Area [mAU*s] | Height [mAU] | Area %  |
|--------|---------------|------|-------------|--------------|--------------|---------|
| 1      | 8.124         | VB   | 0.1801      | 770.64471    | 66.04201     | 49.8542 |
| 2      | 12.763        | BB   | 0.2865      | 775.15118    | 41.77250     | 50.1458 |

Totals : 1545.79590 107.81450

Sample Name:

```

=====
Acq. Operator   :                               Seq. Line :   19
Acq. Instrument : Instrument 1                 Location  : Vial 32
Injection Date  : 6/17/2016 9:56:27 PM        Inj       :    1
                                                Inj Volume: 5.000 µl

Acq. Method    : C:\CHEM32\1\DATA\QDY 2016-06-17 14-27-06\AD-05-30.M
Last changed   : 6/17/2016 10:20:15 PM
                (modified after loading)
Analysis Method: C:\CHEM32\1\METHODS\IC-20-70.M
Last changed   : 6/17/2016 10:40:01 PM
                (modified after loading)
Additional Info: Peak(s) manually integrated
    
```

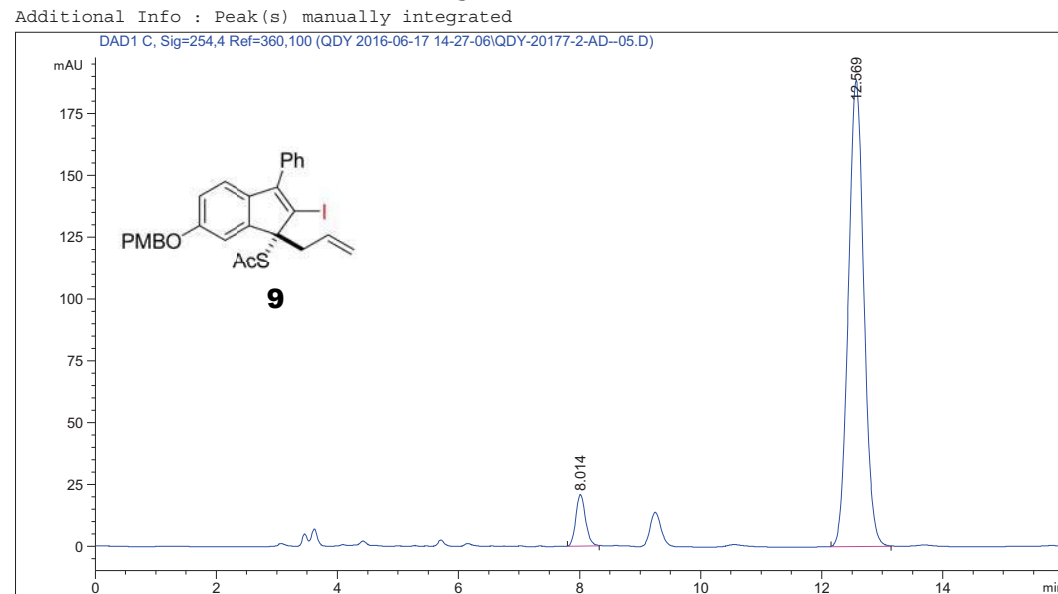

Area Percent Report

```

=====
Sorted By      :      Signal
Multiplier     :      1.0000
Dilution      :      1.0000
Use Multiplier & Dilution Factor with ISTDs
    
```

Signal 1: DAD1 C, Sig=254,4 Ref=360,100

| Peak # | RetTime [min] | Type | Width [min] | Area [mAU*s] | Height [mAU] | Area %  |
|--------|---------------|------|-------------|--------------|--------------|---------|
| 1      | 8.014         | BB   | 0.1721      | 233.15421    | 20.90103     | 6.5009  |
| 2      | 12.569        | BB   | 0.2756      | 3353.31763   | 188.42543    | 93.4991 |

Totals : 3586.47183 209.32646

**Supplementary Figure 218. HPLC spectrum for 9**

**Supplementary Table 1.** Evaluation of Brønsted acid in asymmetric allene synthesis of propargylic alcohol **1** and **2**.<sup>[a]</sup>

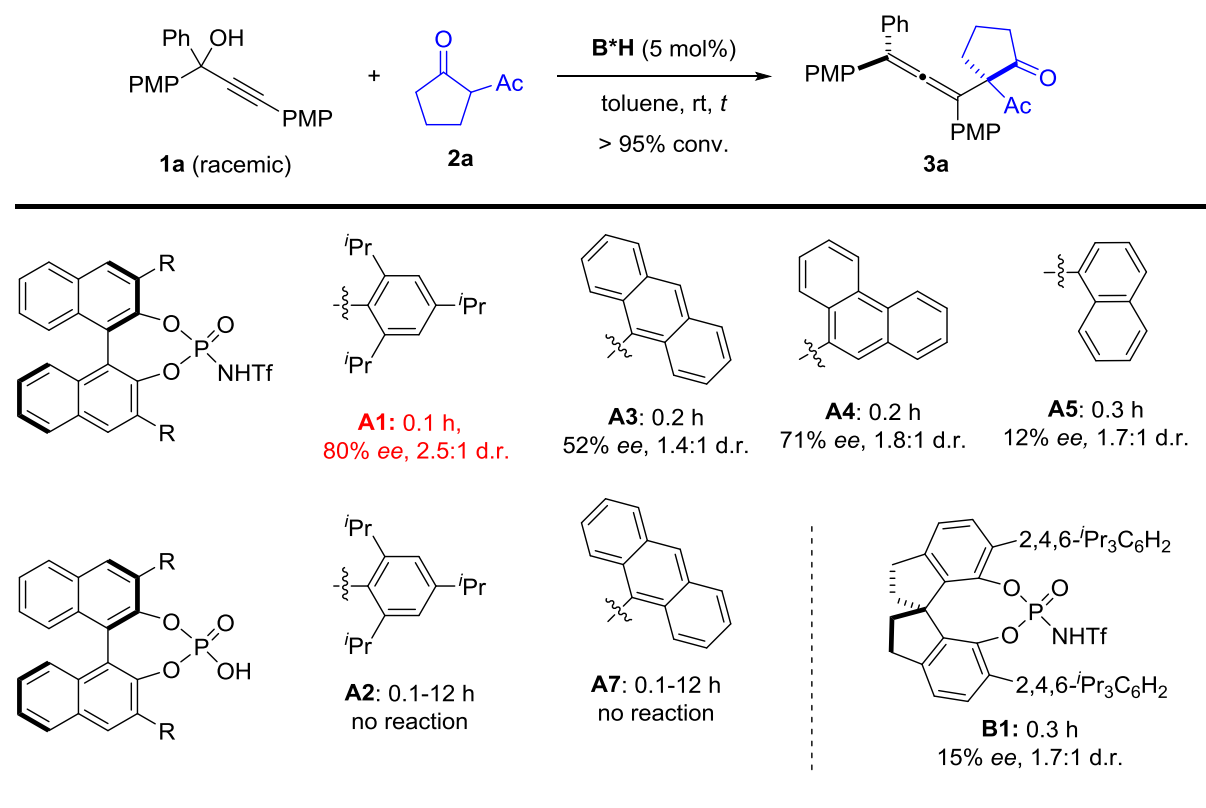

[a] Reaction conditions: **1a** (0.05 mmol), **2a** (0.075 mmol), **B\*H** (2.5 μmol), toluene (1.0 mL). The d.r. was determined by <sup>1</sup>H NMR analysis. The *ee* was determined by HPLC with a chiral stationary phase. PMP = (*p*-MeO)C<sub>6</sub>H<sub>4</sub>.



**Supplementary Table 2.** Solvent and temperature effect on asymmetric allene synthesis of propargylic alcohol **1** and **2**.<sup>[a]</sup>

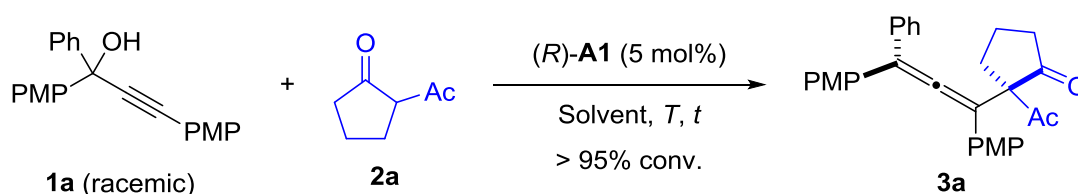

| Entry     | Solvent                            | $T$ [°C]   | $t$ [h]  | d.r. <sup>[b]</sup> | $ee$ [%] <sup>[c]</sup> |
|-----------|------------------------------------|------------|----------|---------------------|-------------------------|
| 1         | toluene                            | 25         | 0.1      | 2.5:1               | 80                      |
| 2         | xylene                             | 25         | 0.2      | 2.5:1               | 73                      |
| 3         | PhF                                | 25         | 0.2      | 2.4:1               | 84                      |
| 4         | CH <sub>2</sub> Cl <sub>2</sub>    | 25         | 0.1      | 1.6:1               | 73                      |
| 5         | DCE                                | 25         | 0.1      | 1.4:1               | 72                      |
| 6         | CHCl <sub>3</sub>                  | 25         | 0.5      | 1.6:1               | 76                      |
| 7         | CCl <sub>4</sub>                   | 25         | 0.1      | 4.6:1               | 85                      |
| 8         | Et <sub>2</sub> O                  | 25         | 12       | 2.8:1               | 84                      |
| 9         | MTBE                               | 25         | 12       | 2.0:1               | 81                      |
| 10        | CH <sub>3</sub> CN                 | 25         | 0.5      | 1:1                 | 7                       |
| 11        | hexane                             | 25         | 3        | 2.1:1               | 65                      |
| 12        | cyclohexane                        | 25         | 1        | 3.5:1               | 80                      |
| 13        | hexane/CCl <sub>4</sub> (1:1)      | 25         | 0.3      | 4.3:1               | 83                      |
| 14        | cyclohexane/CCl <sub>4</sub> (1:1) | 25         | 0.3      | 4.6:1               | 84                      |
| 15        | cyclohexane/CCl <sub>4</sub> (3:1) | 25         | 0.5      | 4.6:1               | 83                      |
| 16        | cyclohexane/CCl <sub>4</sub> (1:3) | 25         | 0.2      | 4.6:1               | 84                      |
| 17        | CCl <sub>4</sub>                   | 0          | 1.5      | 5.3:1               | 88                      |
| <b>18</b> | <b>CCl<sub>4</sub></b>             | <b>-20</b> | <b>3</b> | <b>6.1:1</b>        | <b>90<sup>[d]</sup></b> |

[a] Reaction conditions: **1a** (0.05 mmol), **2a** (0.075 mmol), **A1** (2.5 μmol), solvent (1.0 mL). [b] Determined by <sup>1</sup>H NMR analysis. [c] Determined by HPLC with a chiral stationary phase. [d] **3a** was obtained in 92% isolated yield. PMP = 4-MeOC<sub>6</sub>H<sub>4</sub>.

**Supplementary Table 3.** Other parameters on asymmetric allene synthesis of propargylic alcohol **1** and **2**.<sup>[a]</sup>

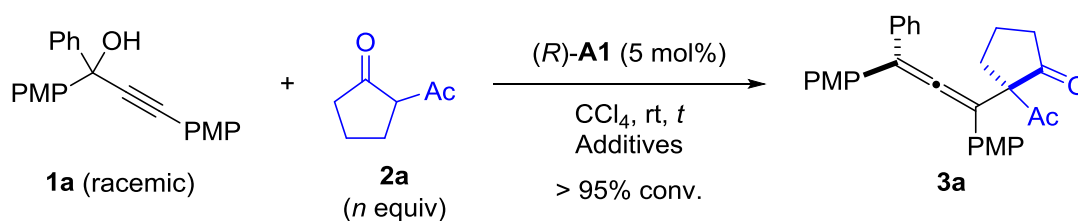

| Entry            | <i>n</i>   | Additives                 | <i>t</i> [h] | d.r. <sup>[b]</sup> | <i>ee</i> [%] <sup>[c]</sup> |
|------------------|------------|---------------------------|--------------|---------------------|------------------------------|
| 1                | 1.1        | -                         | 0.3          | 4.2:1               | 84                           |
| <b>2</b>         | <b>1.5</b> | -                         | <b>0.1</b>   | <b>4.6:1</b>        | <b>85</b>                    |
| 3                | 2.0        | -                         | 0.1          | 4.3:1               | 85                           |
| 4 <sup>[d]</sup> | 1.5        | -                         | 0.1          | 4.4:1               | 85                           |
| 5                | 1.5        | 4Å MS (15 mg)             | 24           | 4.7:1               | 85                           |
| 6                | 1.5        | 3Å MS (15 mg)             | 12           | 4.7:1               | 85                           |
| 7                | 1.5        | MgSO <sub>4</sub> (15 mg) | 0.1          | 4.6:1               | 85                           |

[a] Reaction conditions: **1a** (0.05 mmol), **2a** (0.075 mmol), **A1** (2.5 μmol), solvent (1.0 mL). [b] Determined by <sup>1</sup>H NMR analysis. [c] Determined by HPLC with a chiral stationary phase. [d] c = 0.1 M. PMP = 4-MeOC<sub>6</sub>H<sub>4</sub>.

**Supplementary Table 4.** Reaction optimization on the asymmetric allene synthesis

of propargylic alcohol **1** and **4**.

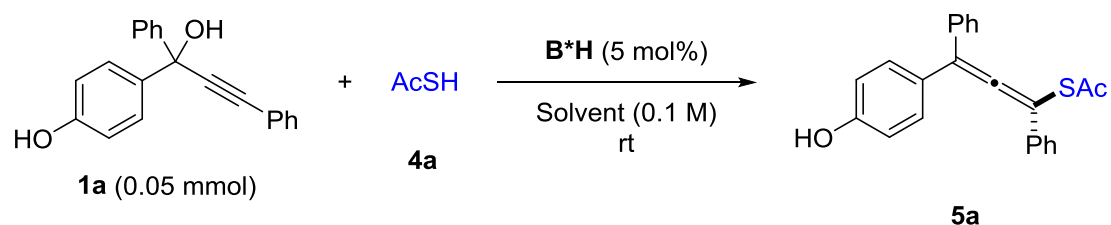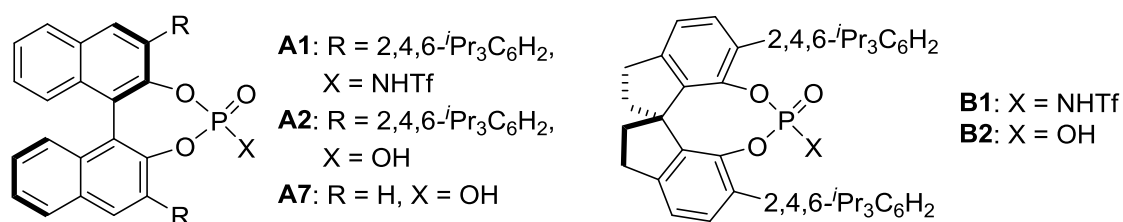

| Entry                       | B*H                     | Solvent           | <i>t</i> [h] | Yield [%] <sup>[a]</sup> | <i>ee</i> [%] <sup>[a]</sup> |
|-----------------------------|-------------------------|-------------------|--------------|--------------------------|------------------------------|
| 1                           | ( <i>R</i> )- <b>A1</b> | CCl <sub>4</sub>  | 0.5          | 87                       | 46                           |
| 2                           | ( <i>R</i> )- <b>A2</b> | CCl <sub>4</sub>  | 18           | 85                       | 60                           |
| 3                           | ( <i>R</i> )- <b>A7</b> | CCl <sub>4</sub>  | 1.5          | 65                       | 20                           |
| 4                           | ( <i>S</i> )- <b>B1</b> | CCl <sub>4</sub>  | 0.3          | 83                       | 85                           |
| 5                           | ( <i>S</i> )- <b>B1</b> | DCM               | 0.3          | 73                       | 81                           |
| 6                           | ( <i>S</i> )- <b>B2</b> | DCM               | 24           | 51                       | 75                           |
| 7                           | ( <i>R</i> )- <b>A1</b> | DCM               | 0.5          | 90                       | 43                           |
| 8                           | ( <i>S</i> )- <b>B1</b> | Et <sub>2</sub> O | 12           | <5                       | -                            |
| 9                           | ( <i>S</i> )- <b>B1</b> | toluene           | 1            | 93                       | 85                           |
| 10 <sup>[b]</sup>           | ( <i>S</i> )- <b>B1</b> | toluene           | 5            | 87                       | 89                           |
| 11 <sup>[c]</sup>           | ( <i>S</i> )- <b>B1</b> | toluene           | 12           | <5                       | -                            |
| 12 <sup>[b,d]</sup>         | ( <i>S</i> )- <b>B1</b> | toluene           | 6            | 85                       | 90                           |
| <b>13<sup>[b,d,e]</sup></b> | <b>(<i>S</i>)-B1</b>    | <b>toluene</b>    | <b>12</b>    | <b>84</b>                | <b>94</b>                    |

[a] Yield was determined by <sup>1</sup>H NMR analysis of the crude mixture. Ee was determined by HPLC with a chiral stationary phase. [b] Run with 3Å molecular sieves (MS, 15 mg). [c] Run 4Å MS (15 mg). [d] c = 0.05 M. [e] Run at -5 °C.

## Supplementary Methods

### General Procedure A

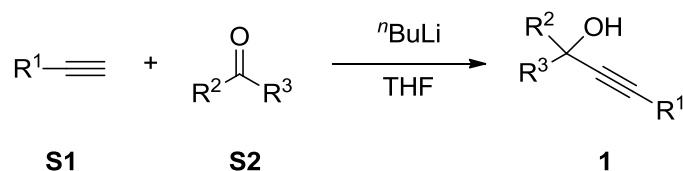

At  $-78\text{ }^{\circ}\text{C}$  under  $\text{N}_2$ , to an oven-dried flask charged with a solution of the terminal alkyne **S1** (7.5 mmol, 1.5 equiv) in dry THF (10 mL) was added  $n\text{BuLi}$  (7.7 mmol, 3.2 mL, 2.4 M in hexane) dropwise. The reaction was stirred for 1 h at the same temperature and then a solution of the corresponding ketone **S2** (5.0 mmol, 1.0 equiv) in THF (5 mL) was added via syringe. The reaction mixture was then gradually warmed up to room temperature. Upon completion ( $\sim 3$  h), the reaction mixture was cooled to  $0\text{ }^{\circ}\text{C}$  and a saturated aqueous  $\text{NH}_4\text{Cl}$  solution (10 mL) was added dropwise. The organic layer was separated. The aqueous layer was extracted with ethyl acetate ( $3 \times 20$  mL). The combined organic layers were washed with brine (50 mL), dried over anhydrous  $\text{Na}_2\text{SO}_4$ , filtered, and concentrated. The residue was purified by silica gel chromatography to afford the pure alcohol **1**.

### General Procedure B

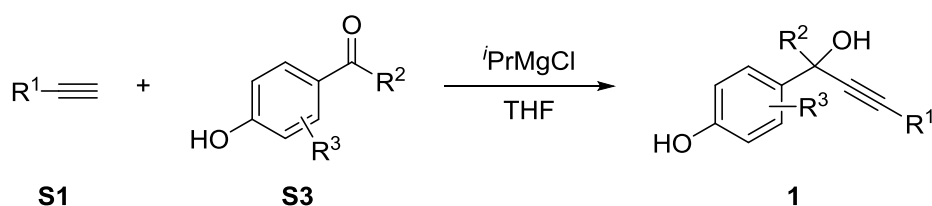

Under  $\text{N}_2$ , to an oven-dried flask charged with a solution of the alkyne **S1** (12.5 mmol, 2.5 equiv) in dry THF (30 mL) was added  $i\text{PrMgCl}$  (12.6 mmol, 6.3 mL, 2.0 M in THF) dropwise at  $0\text{ }^{\circ}\text{C}$ . After addition, the mixture was warmed to room temperature and stirred at the same temperature for 1 hour. Next, the reaction mixture was cooled to  $0\text{ }^{\circ}\text{C}$ , and a solution of the ketone **S3** (5.0 mmol) in THF (5 mL)

was added dropwise. The reaction mixture was then warmed to 60 °C and stirred at the same temperature. The reaction progress was monitored by thin layer chromatography. Upon completion (6-12 h), the reaction mixture was cooled to 0 °C and slowly treated with a saturated aqueous NH<sub>4</sub>Cl solution (10 mL). The layers were separated. The aqueous layer was extracted with EtOAc (3×30 mL). The combined organic layers were dried over anhydrous Na<sub>2</sub>SO<sub>4</sub>, filtered, and concentrated. The residue was purified by silica gel column chromatography to afford the pure alcohol **1**.

**1,3-bis(4-Methoxyphenyl)-1-phenylprop-2-yn-1-ol (1a)** was prepared as pale yellow

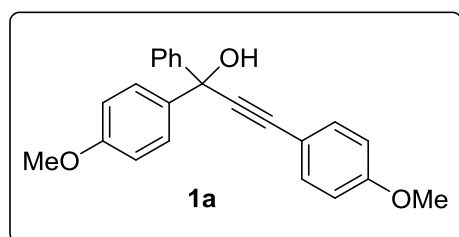

oil according to the General Procedure A (purification by flash column chromatography: 10→20% EtOAc in hexanes, 96% yield).

<sup>1</sup>H NMR (400 MHz, CDCl<sub>3</sub>) δ 7.68 (d, *J* = 7.2 Hz, 2H), 7.59 (d, *J* = 8.8 Hz, 2H), 7.45 (d, *J* = 8.8 Hz,

2H), 7.36 (t, *J* = 7.2 Hz, 2H), 7.28 (t, *J* = 7.2 Hz, 1H), 6.88 (d, *J* = 8.8 Hz, 2H), 6.86 (d, *J* = 8.8 Hz, 2H), 3.81 (s, 3H), 3.80 (s, 3H), 2.97 (br s, 1H) ppm.

<sup>13</sup>C NMR (100 MHz, CDCl<sub>3</sub>) δ 159.8, 159.0, 145.4, 137.5, 133.2, 128.2, 127.5, 127.4, 126.0, 114.5, 113.9, 113.5, 90.6, 86.9, 74.5, 55.3, 55.2 ppm.

IR (thin film) 3450, 2951, 1603, 1507, 1238, 1169, 1021, 827, 661 cm<sup>-1</sup>.

HRMS (CI<sup>+</sup>) Calcd for C<sub>23</sub>H<sub>20</sub>O<sub>3</sub> [M<sup>+</sup>]: 344.1412, Found: 344.1420.

**3-(4-Chlorophenyl)-1-(4-methoxyphenyl)-1-phenylprop-2-yn-1-ol (1b)** as colourless

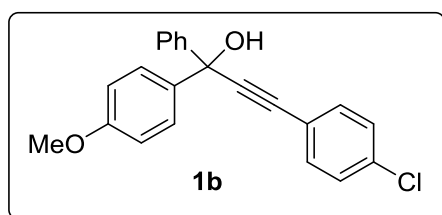

oil according to the General Procedure A (purification by flash column chromatography: 10→20% EtOAc in hexanes, 81% yield).

<sup>1</sup>H NMR (400 MHz, CDCl<sub>3</sub>) δ 7.66 (d, *J* = 7.2 Hz,

2H), 7.57 (d, *J* = 8.8 Hz, 2H), 7.43 (d, *J* = 8.8 Hz, 2H), 7.37 (t, *J* = 7.2 Hz, 2H), 7.32-7.27 (m, 3H), 6.88 (d, *J* = 8.8 Hz, 2H), 3.80 (s, 3H), 2.95 (br s, 1H) ppm.

$^{13}\text{C}$  NMR (100 MHz,  $\text{CDCl}_3$ )  $\delta$  159.1, 145.0, 137.1, 134.6, 133.0, 128.6, 128.3, 127.7, 127.4, 126.0, 120.9, 113.6, 92.9, 85.8, 74.5, 55.2 ppm.

IR (thin film) 3440, 2933, 1607, 1488, 1246, 1169, 1030, 827, 697  $\text{cm}^{-1}$ .

HRMS (CI+) Calcd for  $\text{C}_{22}\text{H}_{17}^{35}\text{ClO}_2$  [ $\text{M}^+$ ]: 348.0917, Found: 348.0926.

**3-(Furan-2-yl)-1-(4-methoxyphenyl)-1-phenylprop-2-yn-1-ol (1c)** as brown oil

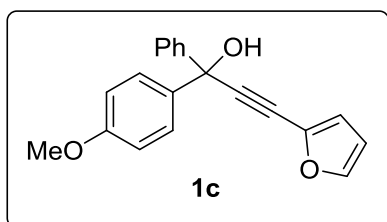

according to the General Procedure A (purification by flash column chromatography: 10  $\rightarrow$  20% EtOAc in hexanes, 81% yield).

$^1\text{H}$  NMR (400 MHz,  $\text{CDCl}_3$ )  $\delta$  7.64 (d,  $J$  = 8.0 Hz, 2H), 7.55 (d,  $J$  = 8.8 Hz, 2H), 7.41 (s, 1H), 7.36 (t,  $J$  = 7.2 Hz, 2H), 7.30 (d,  $J$  = 7.2 Hz, 1H), 6.87 (d,  $J$  = 8.8 Hz, 2H), 6.65-6.64 (m, 1H), 6.42-6.39 (m, 1H), 3.80 (s, 3H), 2.94 (br s, 1H) ppm.

$^{13}\text{C}$  NMR (100 MHz,  $\text{CDCl}_3$ )  $\delta$  159.1, 144.5, 143.8, 136.7, 136.4, 128.3, 127.8, 127.4, 126.0, 115.8, 113.6, 110.9, 95.9, 77.3, 74.5, 55.2 ppm.

IR (thin film) 3418, 2934, 1606, 1508, 1247, 1171, 989, 829, 704  $\text{cm}^{-1}$ .

HRMS (CI+) Calcd for  $\text{C}_{20}\text{H}_{16}\text{O}_3$  [ $\text{M}^+$ ]: 304.1099, Found: 304.1112.

**1-(4-(Allyloxy)phenyl)-3-(4-chlorophenyl)-1-phenylprop-2-yn-1-ol (1d)** as

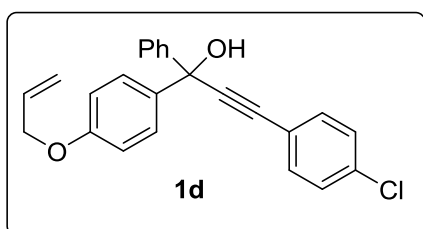

colourless oil according to the General Procedure A (purification by flash column chromatography: 10  $\rightarrow$  20% EtOAc in hexanes, 85% yield).

$^1\text{H}$  NMR (400 MHz,  $\text{CDCl}_3$ )  $\delta$  7.66 (d,  $J$  = 7.2 Hz, 2H), 7.56 (d,  $J$  = 8.8 Hz, 2H), 7.43 (d,  $J$  = 8.8 Hz, 2H), 7.37 (t,  $J$  = 7.2 Hz, 2H), 7.33-7.27 (m, 3H), 6.88 (d,  $J$  = 8.8 Hz, 2H), 6.11-5.99 (m, 1H), 5.41 (d,  $J$  = 17.6 Hz, 1H), 5.30 (d,  $J$  = 10.4 Hz, 1H), 4.53 (d,  $J$  = 5.2 Hz, 2H), 2.92 (br s, 1H) ppm.

$^{13}\text{C}$  NMR (100 MHz,  $\text{CDCl}_3$ )  $\delta$  158.2, 144.9, 137.2, 134.7, 133.1, 133.0, 128.6, 128.3, 127.7, 127.4, 126.0, 120.9, 117.7, 114.4, 92.9, 85.8, 74.5, 68.8 ppm.

IR (thin film) 3429, 2960, 1606, 1488, 1243, 1170, 1091, 986, 827, 698  $\text{cm}^{-1}$ .

HRMS (CI+) Calcd for C<sub>24</sub>H<sub>19</sub><sup>35</sup>ClO<sub>2</sub> [M<sup>+</sup>]: 374.1074, Found: 374.1080.

**1,3-bis(4-Methoxyphenyl)-1-phenylprop-2-yn-1-ol (1a)** was prepared as pale yellow

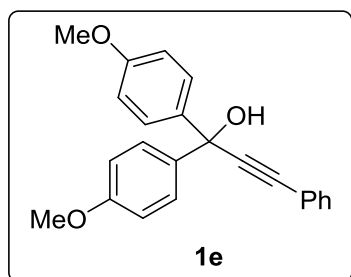

oil according to the literature procedure <sup>1</sup> (purification by flash column chromatography: 10→20% EtOAc in hexanes, 96% yield).

<sup>1</sup>H NMR (400 MHz, CDCl<sub>3</sub>) δ 7.59 (d, *J* = 8.8 Hz, 4H), 7.53-7.50 (m, 2H), 7.35-7.31 (m, 3H), 6.89 (d, *J* = 8.8 Hz,

4H), 3.80 (s, 6H), 2.98 (br s, 1H) ppm.

<sup>13</sup>C NMR (100 MHz, CDCl<sub>3</sub>) δ 159.0, 137.5, 131.7, 128.5, 128.3, 127.3, 122.5, 113.5, 92.1, 86.8, 74.1, 55.2 ppm.

**3-(4-Methoxyphenyl)-1-(4-(methylthio)phenyl)-1-phenylprop-2-yn-1-ol (1f)** as brown oil according to the General Procedure A (purification by flash column

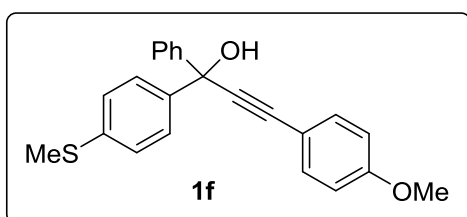

chromatography: 10 → 20% EtOAc in hexanes, 87% yield).

<sup>1</sup>H NMR (400 MHz, CDCl<sub>3</sub>) δ 7.68 (d, *J* = 7.2 Hz, 2H), 7.60 (d, *J* = 8.8 Hz, 2H), 7.45 (d, *J* = 8.8 Hz,

2H), 7.36 (t, *J* = 7.2 Hz, 2H), 7.29 (t, *J* = 7.2 Hz, 1H), 7.23 (d, *J* = 8.8 Hz, 2H), 6.86 (d, *J* = 8.8 Hz, 2H), 3.81 (s, 3H), 2.99 (br s, 1H), 3.47 (s, 3H) ppm.

<sup>13</sup>C NMR (100 MHz, CDCl<sub>3</sub>) δ 159.8, 145.0, 142.2, 137.9, 133.2, 128.2, 127.7, 126.6, 126.2, 126.0, 114.4, 113.9, 90.2, 87.2, 74.5, 55.3, 15.2 ppm.

IR (thin film) 3432, 2919, 1604, 1508, 1245, 1170, 1028, 829, 700 cm<sup>-1</sup>.

HRMS (CI+) Calcd for C<sub>23</sub>H<sub>20</sub>O<sub>2</sub>S [M<sup>+</sup>]: 360.1184, Found: 360.1196.

**3-(4-Chlorophenyl)-1-(4-methoxyphenyl)-1-(thiophen-2-yl)prop-2-yn-1-ol (1g)** as brown oil according to the General Procedure A (purification by flash column chromatography: 10→20% EtOAc in hexanes, 70% yield).

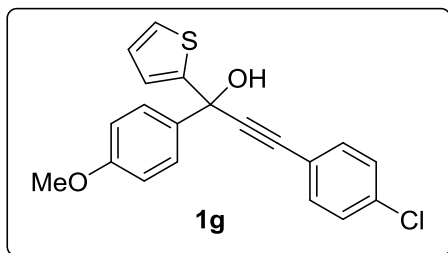

$^1\text{H NMR}$  (400 MHz,  $\text{CDCl}_3$ )  $\delta$  7.66 (d,  $J = 8.8$  Hz, 2H), 7.43 (d,  $J = 8.8$  Hz, 2H), 7.31 (d,  $J = 8.8$  Hz, 2H), 7.29-7.26 (m, 1H), 7.12-1.09 (m, 1H), 6.96-6.92 (m, 1H), 6.91 (d,  $J = 8.8$  Hz, 2H), 3.81 (s, 3H), 3.17 (br s, 1H) ppm.

$^{13}\text{C NMR}$  (100 MHz,  $\text{CDCl}_3$ )  $\delta$  159.4, 150.3, 136.3, 134.8, 133.0, 128.6, 127.1, 126.5, 125.9, 125.3, 120.6, 113.6, 92.2, 85.2, 71.9, 55.3 ppm.

IR (thin film) 3418, 2933, 1606, 1507, 1247, 1171, 1031, 826, 702  $\text{cm}^{-1}$ .

HRMS (CI+) Calcd for  $\text{C}_{20}\text{H}_{15}^{35}\text{ClO}_2\text{S}$  [ $\text{M}^+$ ]: 354.0481, Found: 354.0491.

**4-(1-(2-Fluorophenyl)-1-hydroxy-3-phenylprop-2-yn-1-yl)phenol (1h)** was prepared

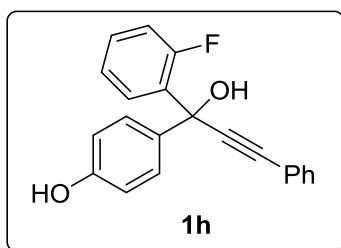

as pale yellow solid according to the General Procedure B (purification by flash column chromatography: 20 $\rightarrow$ 30% EtOAc in hexanes, 93% yield).

$^1\text{H NMR}$  (400 MHz, acetone- $d_6$ )  $\delta$  8.49 (br s, 1H), 7.99 (t,  $J = 8.0$  Hz, 1H), 7.51-7.48 (m, 4H), 7.40-7.31 (m, 4H), 7.25 (t,  $J =$

7.6 Hz, 1H), 7.06-6.98 (m, 1H), 6.80 (d,  $J = 8.8$  Hz, 2H), 5.69 (br s, 1H) ppm.

$^{13}\text{C NMR}$  (100 MHz, acetone- $d_6$ )  $\delta$  160.3 (d,  $J_{\text{C-F}} = 247$  Hz), 157.5, 136.5, 134.1 (d,  $J_{\text{C-F}} = 11$  Hz), 132.0, 130.0 (d,  $J_{\text{C-F}} = 8$  Hz), 129.1, 128.2 (2C), 127.6 (d,  $J_{\text{C-F}} = 3$  Hz), 124.2 (d,  $J_{\text{C-F}} = 4$  Hz), 123.5, 116.5 (d,  $J_{\text{C-F}} = 22$  Hz), 115.1, 92.2, 85.7, 71.3 ppm.

$^{19}\text{F NMR}$  (376 MHz, acetone- $d_6$ )  $\delta$  -112.1 ppm.

IR (thin film) 3383, 1613, 1512, 1453, 1224, 1170, 989, 837, 757  $\text{cm}^{-1}$ .

HRMS (CI+) Calcd for  $\text{C}_{21}\text{H}_{15}\text{FO}_2$  [ $\text{M}^+$ ]: 318.1056, Found: 318.1072.

**4-(1-Hydroxy-1,3-diphenylprop-2-yn-1-yl)phenol (1i)** was prepared as pale yellow

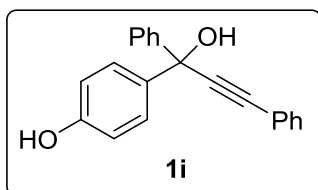

solid according to the General Procedure B (purification by flash column chromatography: 20 $\rightarrow$ 30% EtOAc in hexanes, 87% yield).



$^1\text{H NMR}$  (400 MHz, acetone- $d_6$ )  $\delta$  8.34 (br s, 1H), 7.70 (d,  $J = 8.4$  Hz, 2H), 7.58-7.50 (m, 4H), 7.41-7.37 (m, 3H), 7.34 (t,  $J = 7.2$  Hz, 2H), 7.24 (t,  $J = 7.2$  Hz, 1H), 6.81 (d,  $J = 8.8$  Hz, 2H), 5.61 (br s, 1H) ppm.

$^{13}\text{C NMR}$  (100 MHz, acetone- $d_6$ )  $\delta$  157.2, 147.4, 138.0, 132.0, 129.1, 129.0, 128.5, 128.0, 127.6, 126.5, 123.6, 115.2, 93.9, 86.2, 74.2 ppm.

IR (thin film) 3382, 1598, 1511, 1446, 1236, 1170, 986, 836, 756  $\text{cm}^{-1}$ .

HRMS (CI+) Calcd for  $\text{C}_{21}\text{H}_{16}\text{O}_2$  [ $\text{M}^+$ ]: 300.1150, Found: 300.1152.

**4-(1-Hydroxy-3-(4-methoxyphenyl)-1-phenylprop-2-yn-1-yl)phenol (1j)** was

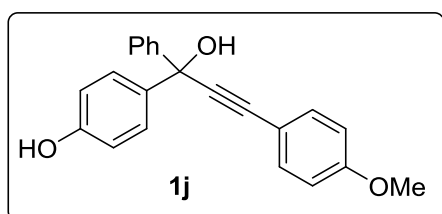

prepared as red solid according to the General Procedure B (purification by flash column chromatography: 20 $\rightarrow$ 30% EtOAc in hexanes, 85% yield).

$^1\text{H NMR}$  (400 MHz, acetone- $d_6$ )  $\delta$  8.33 (br s, 1H), 7.69 (d,  $J = 7.2$  Hz, 2H), 7.51 (d,  $J = 8.4$  Hz, 2H), 7.45 (d,  $J = 8.8$  Hz, 2H), 7.32 (t,  $J = 7.2$  Hz, 2H), 7.23 (t,  $J = 7.2$  Hz, 1H), 6.94 (d,  $J = 7.2$  Hz, 2H), 6.80 (d,  $J = 8.8$  Hz, 2H), 5.51 (br s, 1H), 3.81 (s, 3H) ppm.

$^{13}\text{C NMR}$  (100 MHz, acetone- $d_6$ )  $\delta$  160.6, 157.2, 147.6, 138.3, 133.5, 128.4, 128.0, 127.5, 126.6, 115.5, 115.2, 114.7, 92.4, 86.2, 74.2, 55.4 ppm.

IR (thin film) 3283, 2976, 1606, 1510, 1448, 1249, 1170, 1043, 833, 699  $\text{cm}^{-1}$ .

HRMS (CI+) Calcd for  $\text{C}_{22}\text{H}_{18}\text{O}_3$  [ $\text{M}^+$ ]: 330.1256, Found: 330.1255.

**4-(3-(4-Chlorophenyl)-1-hydroxy-1-phenylprop-2-yn-1-yl)phenol (1k)** was

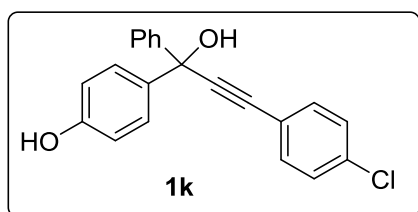

prepared as white solid according to the General Procedure B (purification by flash column chromatography: 20 $\rightarrow$ 30% EtOAc in hexanes, 95% yield).

$^1\text{H NMR}$  (400 MHz, acetone- $d_6$ )  $\delta$  8.29 (br s, 1H), 7.68 (d,  $J = 8.0$  Hz, 2H), 7.51 (t,  $J = 8.4$  Hz, 4H), 7.43 (d,  $J = 8.0$  Hz, 2H), 7.33 (t,  $J = 7.6$  Hz, 2H), 7.24 (d,  $J = 7.6$  Hz, 1H), 6.80 (d,  $J = 7.6$  Hz, 2H), 5.58 (br s, 1H) ppm.

$^{13}\text{C}$  NMR (100 MHz, acetone- $d_6$ )  $\delta$  157.6, 147.5, 138.1, 134.9, 133.9, 129.7, 128.8, 128.3, 128.0, 126.7, 122.7, 115.6, 95.4, 85.3, 74.6 ppm.

IR (thin film) 3289, 1511, 1490, 1170, 982, 830, 699  $\text{cm}^{-1}$ .

HRMS (CI+) Calcd for  $\text{C}_{21}\text{H}_{15}^{35}\text{ClO}_2$  [ $\text{M}^+$ ]: 334.0761, Found: 334.0762.

**1-(4-Methoxyphenyl)-1,3-diphenylprop-2-yn-1-ol (1i')** was prepared as yellow solid

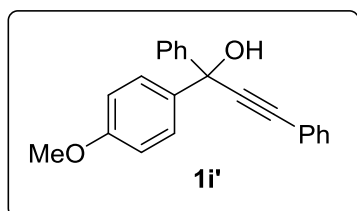

in 92% yield according to the literature procedure<sup>2</sup> (purification by flash column chromatography: 10 $\rightarrow$ 20% EtOAc in hexanes).

$^1\text{H}$  NMR (400 MHz, acetone- $d_6$ )  $\delta$  7.71 (d,  $J$  = 7.6 Hz, 2H), 7.62 (d,  $J$  = 8.8, 2H), 7.54–7.50 (m, 2H), 7.41–7.31 (m, 5H), 7.25 (t,  $J$  = 7.6 Hz, 1H), 6.90 (d,  $J$  = 8.8 Hz, 2H), 5.65 (s, 1H), 3.77 (s, 3H) ppm.

$^{13}\text{C}$  NMR (100 MHz, acetone- $d_6$ )  $\delta$  159.7, 147.3, 139.2, 132.1, 129.2, 128.6 (2C), 128.0, 127.7, 126.6, 123.6, 113.9, 93.9, 86.4, 74.3, 55.3 ppm.

**4-(3-(Furan-2-yl)-1-hydroxy-1-phenylprop-2-yn-1-yl)phenol (1l)** was prepared as

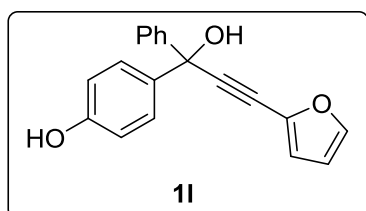

pale yellow solid according to the General Procedure B (purification by flash column chromatography: 20 $\rightarrow$ 30% EtOAc in hexanes, 75% yield).

$^1\text{H}$  NMR (400 MHz, acetone- $d_6$ )  $\delta$  8.38 (br s, 1H), 7.65 (d,  $J$  = 7.2 Hz, 2H), 7.61–7.59 (m, 1H), 7.47 (d,  $J$  = 8.8 Hz, 2H), 7.34 (t,  $J$  = 7.6 Hz, 2H), 7.25 (t,  $J$  = 7.2 Hz, 1H), 6.81 (d,  $J$  = 8.8 Hz, 2H), 6.74–6.72 (m, 1H), 6.52–6.49 (m, 1H), 5.72 (br s, 1H) ppm.

$^{13}\text{C}$  NMR (100 MHz, acetone- $d_6$ )  $\delta$  157.3, 146.7, 144.7, 137.3, 137.1, 128.5, 127.9, 127.7, 126.5, 115.9, 115.3, 111.6, 97.7, 76.6, 74.3 ppm.

IR (thin film) 3330, 1613, 1511, 1448, 1213, 1171, 1050, 834, 698  $\text{cm}^{-1}$ .

HRMS (CI+) Calcd for  $\text{C}_{19}\text{H}_{14}\text{O}_3$  [ $\text{M}^+$ ]: 290.0943, Found: 290.0952.

**4-(1-Hydroxy-1-phenyl-3-(thiophen-3-yl)prop-2-yn-1-yl)phenol (1m)** was prepared

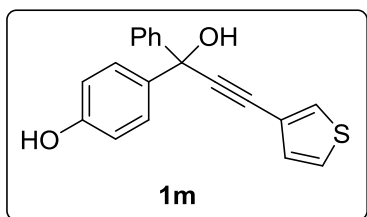

as pale yellow solid according to the General Procedure B (purification by flash column chromatography: 20→30% EtOAc in hexanes, 83% yield).

$^1\text{H NMR}$  (400 MHz, acetone- $d_6$ )  $\delta$  8.32 (br s, 1H), 7.71-7.65 (m, 3H), 7.53-7.47 (m, 3H), 7.32 (t,  $J$  = 7.6 Hz, 2H), 7.25-7.18 (m, 2H), 6.79 (d,  $J$  = 8.4 Hz, 2H), 5.56 (br s, 1H) ppm.

$^{13}\text{C NMR}$  (100 MHz, acetone- $d_6$ )  $\delta$  157.3, 147.4, 138.1, 130.3, 129.6, 128.5, 128.1, 127.6, 126.7, 126.6, 122.6, 115.2, 93.3, 81.6, 74.3 ppm.

**IR** (thin film) 3379, 2884, 1613, 1511, 1358, 1167, 1099, 784, 700  $\text{cm}^{-1}$ .

**HRMS** (CI+) Calcd for  $\text{C}_{19}\text{H}_{14}\text{O}_2\text{S}$  [ $\text{M}^+$ ]: 306.0715, Found: 306.0718.

**4-(3-(4-Fluorophenyl)-1-hydroxy-1-phenylprop-2-yn-1-yl)phenol (1n)** was prepared

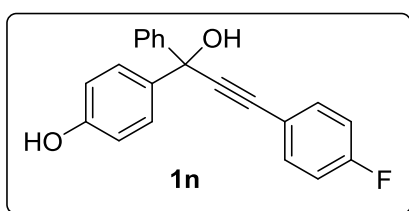

as white solid according to the General Procedure B (purification by flash column chromatography: 20→30% EtOAc in hexanes, 82% yield).

$^1\text{H NMR}$  (400 MHz, acetone- $d_6$ )  $\delta$  8.35 (br s, 1H), 7.69 (d,  $J$  = 7.2 Hz, 2H), 7.59-7.50 (m, 4H), 7.33 (t,  $J$  = 7.2 Hz, 2H), 7.23 (t,  $J$  = 7.2 Hz, 1H), 7.17 (t,  $J$  = 8.8 Hz, 2H), 6.81 (d,  $J$  = 8.8 Hz, 2H), 5.60 (br s, 1H) ppm.

$^{13}\text{C NMR}$  (100 MHz, acetone- $d_6$ )  $\delta$  163.1 (d,  $J_{\text{C-F}}$  = 246 Hz), 157.2, 147.2, 137.9, 134.1 (d,  $J_{\text{C-F}}$  = 8.5 Hz), 128.4, 127.9, 127.5, 126.5, 119.8 (d,  $J_{\text{C-F}}$  = 3.5 Hz), 116.2 (d,  $J_{\text{C-F}}$  = 22.3 Hz), 115.2, 93.7, 85.0, 74.2 ppm.

$^{19}\text{F NMR}$  (376 MHz, acetone- $d_6$ )  $\delta$  -112.4 ppm.

**IR** (thin film) 3288, 2978, 1600, 1509, 1449, 1230, 1170, 987, 835, 699  $\text{cm}^{-1}$ .

**HRMS** (CI+) Calcd for  $\text{C}_{21}\text{H}_{15}\text{FO}_2$  [ $\text{M}^+$ ]: 318.1056, Found: 318.1058.

**4-(3-(3,5-Dimethylphenyl)-1-hydroxy-1-phenylprop-2-yn-1-yl)phenol (1o)** was

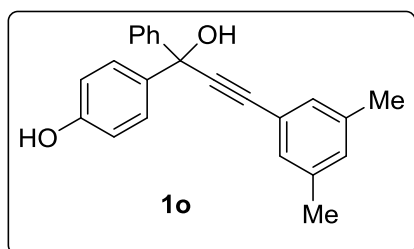

prepared as pale yellow solid according to the General Procedure B (purification by flash column chromatography: 20→30% EtOAc in hexanes, 87% yield).

<sup>1</sup>H NMR (400 MHz, acetone-*d*<sub>6</sub>) δ 8.32 (br s, 1H), 7.68 (d, *J* = 7.2 Hz, 2H), 7.50 (d, *J* = 8.8 Hz, 2H), 7.33 (t, *J* = 7.6 Hz, 2H), 7.23 (t, *J* = 7.6 Hz, 1H), 7.12 (s, 2H), 7.02 (s, 1H), 6.80 (d, *J* = 8.4 Hz, 2H), 5.54 (br s, 1H), 2.28 (s, 6H) ppm.

<sup>13</sup>C NMR (100 MHz, acetone-*d*<sub>6</sub>) δ 157.3, 147.6, 138.7, 138.2, 130.8, 129.7, 128.5, 128.1, 127.6, 126.6, 123.4, 115.3, 93.3, 86.6, 74.3, 20.8 ppm.

IR (thin film) 3285, 2977, 1598, 1511, 1449, 1167, 982, 833, 699 cm<sup>-1</sup>.

HRMS (CI<sup>+</sup>) Calcd for C<sub>23</sub>H<sub>20</sub>O<sub>2</sub> [M<sup>+</sup>]: 328.1463, Found: 328.1470.

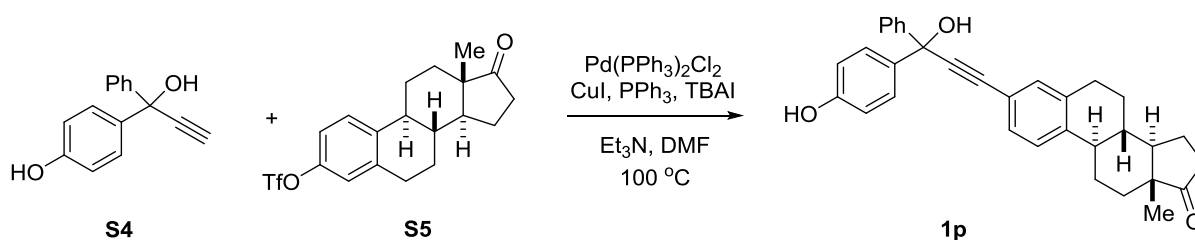

**(8*R*,9*S*,13*S*,14*S*)-3-(3-Hydroxy-3-(4-hydroxyphenyl)-3-phenylprop-1-yn-1-yl)-13-methyl-6,7,8,9,11,12,13,14,15,16-decahydro-17*H*-cyclopenta[*a*]phenanthren-17-one (1p)**

was synthesized according to the literature procedure.<sup>3</sup> An oven-dried Schlenk tube was charged with triflate **S5**<sup>4</sup> (2.6 g, 6.5 mmol, 1.3 equiv), Pd(PPh<sub>3</sub>)<sub>2</sub>Cl<sub>2</sub> (351.6 mg, 0.5 mmol, 0.1 equiv), PPh<sub>3</sub> (164.9 mg, 0.65 mmol, 0.13 equiv), and CuI (49.4 mg, 0.25 mmol, 0.05 equiv). Then anhydrous DMF (5 mL) and anhydrous Et<sub>3</sub>N (5 mL) were added under N<sub>2</sub>. After degassing, the alkyne **S4** (1.1g, 5.0 mmol) was added, and the reaction mixture was stirred at 95 °C for 24 h. Then, the reaction mixture was cooled to room temperature, diluted with Et<sub>2</sub>O, and washed with brine. The layers were separated and the organic layer was dried over Na<sub>2</sub>SO<sub>4</sub>, filtered, and concentrated.

The crude product was purified by flash column chromatography (10→30% EtOAc in hexanes) to afford the pure alkyne **1p** as a red solid (0.92 g, 39% yield).

$^1\text{H NMR}$  (400 MHz, acetone- $d_6$ )  $\delta$  8.37 (br s, 1H), 7.72 (d,  $J = 7.2$  Hz, 2H), 7.55 (d,  $J = 8.8$  Hz, 2H), 7.39-7.33 (m, 3H), 7.31-7.25 (m, 3H), 6.83 (d,  $J = 8.8$  Hz, 1H), 5.57 (br s, 1H), 2.94-2.90 (m, 2H), 2.51-2.41 (m, 2H), 2.35-2.30 (m, 1H), 2.15-1.98 (m, 4H), 1.92-1.87 (m, 1H), 1.72-1.38 (m, 6H), 0.92 (s, 3H) ppm.

$^{13}\text{C NMR}$  (100 MHz, acetone- $d_6$ )  $\delta$  219.2, 157.3, 147.6, 141.4, 138.2, 137.6, 132.5, 129.3, 128.5, 128.1, 127.6, 126.6, 126.2, 120.8, 115.3, 93.2, 86.5, 74.3, 50.9, 48.1, 45.0, 38.6, 35.8, 32.3, 29.5, 26.8, 26.1, 21.9, 13.9 ppm.

IR (thin film) 3396, 2932, 1724, 1614, 1511, 1264, 1056, 833, 699  $\text{cm}^{-1}$ .

HRMS (CI+) Calcd for  $\text{C}_{33}\text{H}_{32}\text{O}_3$  [ $\text{M}^+$ ]: 476.2351, Found: 476.2334.

**4-(3-(Cyclohex-1-en-1-yl)-1-hydroxy-1-phenylprop-2-yn-1-yl)phenol (1q)** was

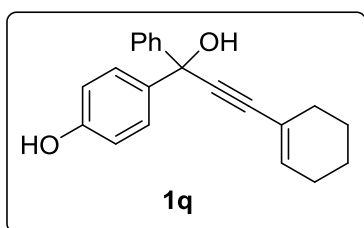

prepared as pale yellow solid according to the General Procedure B (purification by flash column chromatography: 20→30% EtOAc in hexanes) in 93% yield.

$^1\text{H NMR}$  (400 MHz, acetone- $d_6$ )  $\delta$  8.29 (br s, 1H), 7.61 (d,  $J = 7.2$  Hz, 2H), 7.43 (d,  $J = 8.8$  Hz, 2H), 7.29 (t,  $J = 7.2$  Hz, 2H), 7.20 (t,  $J = 7.2$  Hz, 1H), 6.76 (d,  $J = 7.6$  Hz, 2H), 6.12-6.09 (m, 1H), 5.36 (br s, 1H), 2.17-2.07 (m, 4H), 1.66-1.56 (m, 4H) ppm.

$^{13}\text{C NMR}$  (100 MHz, acetone- $d_6$ )  $\delta$  157.1, 147.8, 138.4, 134.9, 128.4, 128.0, 127.4, 126.6, 121.1, 115.1, 91.3, 88.1, 74.1, 25.9, 22.7, 21.9 ppm.

IR (thin film) 3396, 2931, 1614, 1511, 1448, 1227, 1166, 833, 699  $\text{cm}^{-1}$ .

HRMS (CI+) Calcd for  $\text{C}_{21}\text{H}_{20}\text{O}_2$  [ $\text{M}^+$ ]: 304.1463, Found: 304.1477.

**4-(1-Hydroxy-4-methyl-1-phenylpent-4-en-2-yn-1-yl)phenol (1r)** was prepared as pale yellow solid according to the General Procedure B (purification by flash column chromatography: 20→30% EtOAc in hexanes) in 86% yield.

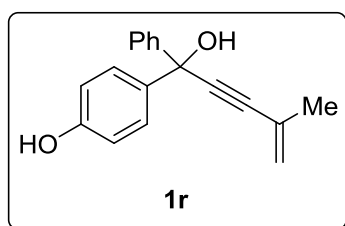

$^1\text{H NMR}$  (400 MHz, acetone- $d_6$ )  $\delta$  8.38 (br s, 1H), 7.61 (d,  $J$  = 8.8 Hz, 2H), 7.43 (d,  $J$  = 8.4 Hz, 2H), 7.31 (t,  $J$  = 7.6 Hz, 2H), 7.21 (t,  $J$  = 7.6 Hz, 1H), 6.77 (d,  $J$  = 8.8 Hz, 2H), 5.49 (br s, 1H), 5.32-5.28 (m, 2H), 1.92 (t,  $J$  = 1.6 Hz, 3H) ppm.

$^{13}\text{C NMR}$  (100 MHz, acetone- $d_6$ )  $\delta$  157.1, 147.4, 138.0, 128.3, 127.9, 127.4, 127.3, 126.4, 121.8, 115.1, 93.0, 87.2, 74.0, 23.2 ppm.

IR (thin film) 3384, 1613, 1511, 1448, 1237, 1172, 996, 837, 699  $\text{cm}^{-1}$ .

HRMS (CI $^+$ ) Calcd for  $\text{C}_{18}\text{H}_{16}\text{O}_2$  [ $\text{M}^+$ ]: 264.1150, Found: 264.1153.

**4-(1-Hydroxy-1-phenyl-3-(trimethylsilyl)prop-2-yn-1-yl)phenol (1s)** was prepared

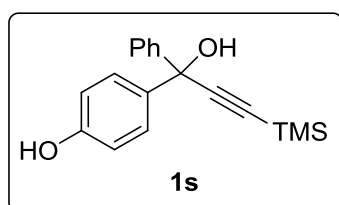

as white solid according to the General Procedure B (purification by flash column chromatography: 20 $\rightarrow$ 30% EtOAc in hexanes) in 92% yield.

$^1\text{H NMR}$  (400 MHz, acetone- $d_6$ )  $\delta$  8.32 (br s, 1H), 7.62 (d,  $J$  = 7.2 Hz, 2H), 7.44 (d,  $J$  = 8.8 Hz, 2H), 7.30 (t,  $J$  = 7.2 Hz, 2H), 7.21 (t,  $J$  = 7.2 Hz, 1H), 6.77 (d,  $J$  = 8.8 Hz, 2H), 5.47 (br s, 1H), 0.20 (s, 9H) ppm.

$^{13}\text{C NMR}$  (100 MHz, acetone- $d_6$ )  $\delta$  155.2, 147.2, 137.9, 128.4, 127.9, 127.6, 126.5, 115.2, 110.4, 90.2, 74.1, -0.3 ppm.

IR (thin film) 3355, 2974, 2168, 1613, 1512, 1449, 1251, 1059, 842, 766  $\text{cm}^{-1}$ .

HRMS (CI $^+$ ) Calcd for  $\text{C}_{18}\text{H}_{20}\text{O}_2\text{Si}$  [ $\text{M}^+$ ]: 296.1233, Found: 296.1237.

**4-(1-Hydroxy-1-phenyl-3-(triethylsilyl)prop-2-yn-1-yl)phenol (1t)** was prepared as

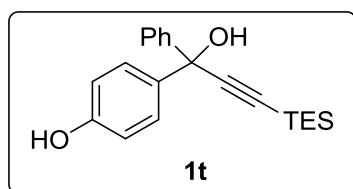

white solid according to the General Procedure B (purification by flash column chromatography: 20 $\rightarrow$ 30% EtOAc in hexanes) in 50% yield.

$^1\text{H NMR}$  (400 MHz,  $\text{CDCl}_2$ )  $\delta$  7.62 (d,  $J$  = 8.4 Hz, 2H), 7.47 (d,  $J$  = 8.8 Hz, 2H), 7.33 (t,  $J$  = 7.2 Hz, 2H), 7.27 (t,  $J$  = 7.2 Hz, 1H), 6.76 (d,  $J$  = 8.8 Hz, 2H), 5.40 (br s, 1H), 1.04 (t,  $J$  = 8.0 Hz, 9H), 0.69 (q,  $J$  = 8.0 Hz, 6H) ppm.

$^{13}\text{C}$  NMR (100 MHz,  $\text{CDCl}_2$ )  $\delta$  155.7, 145.6, 137.8, 128.6, 127.94, 127.86, 126.2, 115.3, 109.7, 89.8, 74.8, 7.7, 4.7 ppm.

IR (thin film) 3321, 2956, 1598, 1511, 1450, 1172, 1004, 835, 728  $\text{cm}^{-1}$ .

HRMS (CI+) Calcd for  $\text{C}_{21}\text{H}_{26}\text{O}_2\text{Si}$  [ $\text{M}^+$ ]: 338.1702, Found: 338.1714.

**4-(1-Hydroxy-1-phenylhept-2-yn-1-yl)phenol (1u)** was prepared as white solid

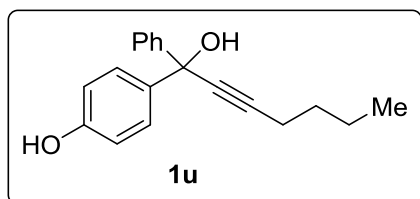

according to the General Procedure B (purification by flash column chromatography: 20→30% EtOAc in hexanes) in 89% yield.

$^1\text{H}$  NMR (400 MHz, acetone- $d_6$ )  $\delta$  8.32 (br s, 1H), 7.60 (d,  $J = 7.2$  Hz, 2H), 7.43 (d,  $J = 8.8$  Hz, 2H), 7.28 (t,  $J = 7.2$  Hz, 2H), 7.18 (t,  $J = 7.2$  Hz, 1H), 6.75 (d,  $J = 8.8$  Hz, 2H), 5.26 (br s, 1H), 2.32 (t,  $J = 7.2$  Hz, 2H), 2.06-1.41 (m, 4H), 0.92 (t,  $J = 7.2$  Hz, 3H) ppm.

$^{13}\text{C}$  NMR (100 MHz, acetone- $d_6$ )  $\delta$  157.0, 148.0, 138.6, 128.2, 127.9, 127.2, 126.5, 114.9, 86.6, 84.9, 73.8, 31.3, 22.2, 18.6, 13.5 ppm.

IR (thin film) 3385, 2958, 1614, 1511, 1449, 1171, 1001, 829, 699  $\text{cm}^{-1}$ .

HRMS (CI+) Calcd for  $\text{C}_{19}\text{H}_{20}\text{O}_2$  [ $\text{M}^+$ ]: 280.1463, Found: 280.1466.

**4-(1-Hydroxy-1,5-diphenylpent-2-yn-1-yl)phenol (1v)** was prepared as brown oil

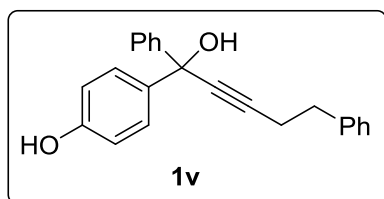

according to the General Procedure B (purification by flash column chromatography: 20 → 30% EtOAc in hexanes, 67% yield).

$^1\text{H}$  NMR (400 MHz, acetone- $d_6$ )  $\delta$  8.29 (br s, 1H), 7.52 (d,  $J = 8.4$  Hz, 2H), 7.35-7.15 (m, 10H), 6.72 (d,  $J = 8.8$  Hz, 2H), 5.21 (br s, 1H), 2.87 (t,  $J = 7.2$  Hz, 2H), 2.63 (t,  $J = 7.2$  Hz, 2H) ppm.

$^{13}\text{C}$  NMR (100 MHz, acetone- $d_6$ )  $\delta$  157.0, 147.9, 141.5, 138.6, 129.3, 128.9, 128.3, 128.0, 127.3, 126.8, 126.6, 115.0, 86.2, 85.6, 73.8, 35.3, 21.2 ppm.

IR (thin film) 3340, 2977, 1611, 1511, 1449, 1171, 1018, 832, 699  $\text{cm}^{-1}$ .

HRMS (CI+) Calcd for  $\text{C}_{23}\text{H}_{20}\text{O}_2$  [ $\text{M}^+$ ]: 328.1463, Found: 328.1452.

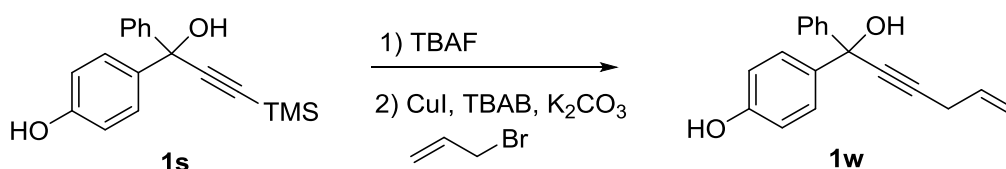

**4-(1-Hydroxy-1-phenylhex-5-en-2-yn-1-yl)phenol (1w)** was prepared from alcohol **1s** according to the literature procedure.<sup>5</sup> At room temperature, to a stirred solution of alcohol **1s** (3.0 g, 10.0 mmol) in THF (20 mL) was added a solution of tetrabutylammonium fluoride (3.1 g, 12.0 mmol, 1.2 equiv) in THF (12 mL) dropwise. The mixture was stirred for 1 h and then concentrated to evaporate most of the THF solvent. The residue was taken up in diethyl ether and water (1:1, 20 mL). The resulting layers were separated and the aqueous layer was extracted with diethyl ether (3 × 20 mL). The combined organic layers were dried, filtered, and concentrated. The residue was purified by silica gel column chromatography (20 → 30% EtOAc in hexanes) to give the terminal alkyne (1.95 g, 87% yield) as pale brown solid. Under N<sub>2</sub>, to a stirred solution of the above terminal alkyne (1.12 g, 5.0 mmol) in dry DMF (5 mL) were sequentially added K<sub>2</sub>CO<sub>3</sub> (0.97 g, 7.0 mmol), tetrabutylammonium bromide (241 mg, 0.75 mmol), and CuI (48 mg, 0.25 mmol) at room temperature. Allyl bromide (0.65 mL, 7.5 mmol) was added 15 min later. Next, the reaction mixture was stirred for 24 h before it was poured into water and extracted with ether (20 mL × 3). The combined organic layers were washed with brine, dried over MgSO<sub>4</sub>, filtered, and concentration. The residue was purified by silica gel flash column chromatography (10 → 20% EtOAc in hexanes) to give the pure **1w** (1.13 g, 66% yield) as pale yellow solid.

<sup>1</sup>H NMR (400 MHz, acetone-*d*<sub>6</sub>) δ 8.30 (br s, 1H), 7.61 (d, *J* = 8.0 Hz, 2H), 7.44 (d, *J* = 8.0 Hz, 2H), 7.29 (t, *J* = 7.6 Hz, 2H), 7.20 (t, *J* = 7.6 Hz, 1H), 6.76 (d, *J* = 8.8 Hz, 2H), 5.94-5.83 (m, 1H), 5.41-5.30 (m, 1H), 5.36 (br s, 1H), 5.12-5.07 (m, 1H), 3.14-2.98 (m, 2H) ppm.

<sup>13</sup>C NMR (100 MHz, acetone-*d*<sub>6</sub>) δ 157.1, 147.8, 138.5, 133.5, 128.3, 128.0, 127.4, 126.5, 116.0, 115.1, 87.3, 83.3, 73.9, 23.2 ppm.

IR (thin film) 3380, 1612, 1511, 1448, 1233, 1172, 994, 830, 700 cm<sup>-1</sup>.



HRMS (CI<sup>+</sup>) Calcd for C<sub>18</sub>H<sub>16</sub>O<sub>2</sub> [M<sup>+</sup>]: 264.1150, Found: 264.1140.

**4-(1-Hydroxy-1-phenylundeca-2,10-diyn-1-yl)phenol (1x)** was prepared as brown

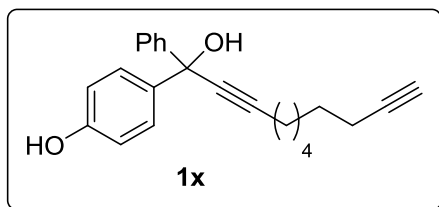

oil according to the General Procedure B (purification by flash column chromatography: 20 → 30% EtOAc in hexanes, 78% yield).

<sup>1</sup>H NMR (400 MHz, CD<sub>2</sub>Cl<sub>2</sub>) δ 7.57 (d, *J* = 7.2 Hz, 2H), 7.44 (d, *J* = 8.8 Hz, 2H), 7.31 (t, *J* = 7.2 Hz, 2H), 7.24 (t, *J* = 7.2 Hz, 1H), 6.76 (t, *J* = 8.8 Hz, 2H), 5.24 (br s, 1H), 2.83 (br s, 1H), 2.35 (t, *J* = 7.2 Hz, 2H), 2.21-2.15 (m, 2H), 1.98-1.96 (m, 1H), 1.65-1.38 (m, 8H) ppm.

<sup>13</sup>C NMR (100 MHz, CD<sub>2</sub>Cl<sub>2</sub>) δ 155.6, 146.3, 138.4, 128.5, 127.9, 127.8, 126.2, 115.2, 88.4, 85.0, 83.6, 74.5, 68.4, 28.81, 28.77, 28.7, 28.6, 19.1, 18.6 ppm.

IR (thin film) 3384, 3296, 2935, 1611, 1511, 1447, 1231, 1171, 831, 699 cm<sup>-1</sup>.

HRMS (CI<sup>+</sup>) Calcd for C<sub>23</sub>H<sub>24</sub>O<sub>2</sub> [M<sup>+</sup>]: 332.1776, Found: 332.1774.

**4-(5-((*tert*-Butyldimethylsilyl)oxy)-1-hydroxy-1-phenylpent-2-yn-1-yl)phenol (1y)**

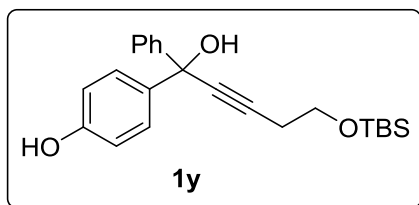

was prepared as yellow oil according to the General Procedure B (purification by flash column chromatography: 20 → 30% EtOAc in hexanes, 75% yield).

<sup>1</sup>H NMR (400 MHz, CD<sub>2</sub>Cl<sub>2</sub>) δ 7.57 (d, *J* = 8.4 Hz, 2H), 7.44 (d, *J* = 8.8 Hz, 2H), 7.31 (t, *J* = 7.6 Hz, 2H), 7.24 (t, *J* = 7.2 Hz, 1H), 6.75 (t, *J* = 8.8 Hz, 2H), 3.80 (t, *J* = 6.8 Hz, 2H), 2.55 (t, *J* = 6.8 Hz, 2H), 0.91 (s, 9H), 0.08 (s, 6H) ppm.

<sup>13</sup>C NMR (100 MHz, CD<sub>2</sub>Cl<sub>2</sub>) δ 155.6, 146.2, 138.3, 128.5, 127.9, 127.8, 126.2, 115.2, 85.5, 84.4, 74.4, 62.2, 26.1, 23.6, 18.6, -5.2 ppm.

IR (thin film) 3363, 2929, 1613, 1511, 1448, 1254, 1105, 834, 698 cm<sup>-1</sup>.

HRMS (CI<sup>+</sup>) Calcd for C<sub>23</sub>H<sub>30</sub>O<sub>3</sub>Si [M<sup>+</sup>]: 382.1964, Found: 382.1962.

**4-(6-Chloro-1-hydroxy-1-phenylhex-2-yn-1-yl)phenol (1z)** was prepared as pale

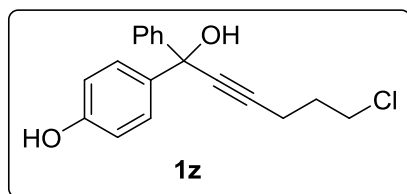

yellow solid according to the General Procedure A (purification by flash column chromatography: 20→30% EtOAc in hexanes, 98% yield).

$^1\text{H NMR}$  (400 MHz, acetone- $d_6$ )  $\delta$  8.28 (br s, 1H), 7.60 (d,  $J$  = 7.2 Hz, 2H), 7.43 (d,  $J$  = 8.8 Hz, 2H), 7.29 (t,  $J$  = 7.2 Hz, 2H), 7.20 (t,  $J$  = 7.2 Hz, 1H), 6.76 (d,  $J$  = 8.8 Hz, 2H), 5.35 (br s, 1H), 3.74 (t,  $J$  = 6.4 Hz, 2H), 2.52 (t,  $J$  = 6.8 Hz, 2H), 2.00 (q,  $J$  = 6.4 Hz, 2H) ppm.

$^{13}\text{C NMR}$  (100 MHz, acetone- $d_6$ )  $\delta$  157.0, 147.8, 138.4, 128.3, 127.9, 127.3, 126.4, 115.0, 85.8, 84.9, 73.8, 44.2, 32.0, 16.3 ppm.

IR (thin film) 3388, 2961, 1613, 1511, 1448, 1234, 1172, 1016, 831, 700  $\text{cm}^{-1}$ .

HRMS (CI+) Calcd for  $\text{C}_{18}\text{H}_{17}^{35}\text{ClO}_2$  [ $\text{M}^+$ ]: 300.0917, Found: 300.0913.

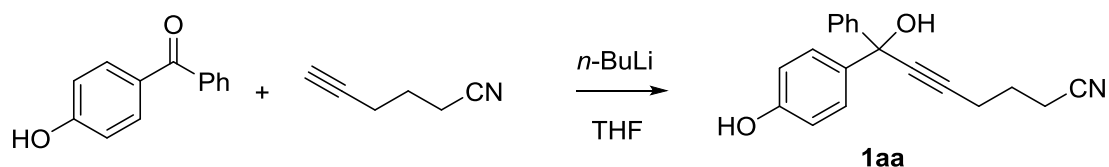

**7-Hydroxy-7-(4-hydroxyphenyl)-7-phenylhept-5-ynenitrile (1aa).** At  $-78$  °C under  $\text{N}_2$ , to an oven-dried flask charged with a solution of hex-5-ynenitrile (1.3 mL, 12.5 mmol) in dry THF (50 mL) was added  $n\text{-BuLi}$  (12.5 mmol, 5.2 mL, 2.4 M in hexane) dropwise. The reaction was stirred for 1 h at the same temperature and then a solution of the ketone (1.0 g, 5.0 mmol) in THF (3 mL) was added via syringe. The reaction mixture was then warmed to  $60$  °C and stirred overnight. Upon completion (~12 h), the reaction mixture was cooled to  $0$  °C. A saturated aqueous  $\text{NH}_4\text{Cl}$  solution (20 mL) was added dropwise. The organic layer was separated. The aqueous layer was extracted with  $\text{Et}_2\text{O}$  (3×20 mL). The combined organic layers were dried over anhydrous  $\text{Na}_2\text{SO}_4$ , filtered, and concentrated. The residue was purified by silica gel chromatography to afford the pure alcohol **1aa** as brown oil (20→30% EtOAc in hexanes, 0.87 g, 60% yield).

$^1\text{H NMR}$  (400 MHz, acetone- $d_6$ )  $\delta$  8.28 (br s, 1H), 7.60 (d,  $J = 7.2$  Hz, 2H), 7.42 (d,  $J = 8.8$  Hz, 2H), 7.29 (t,  $J = 7.6$  Hz, 2H), 7.20 (t,  $J = 7.2$  Hz, 1H), 6.76 (d,  $J = 8.8$  Hz, 2H), 5.36 (br s, 1H), 2.61 (t,  $J = 7.2$  Hz, 2H), 2.51 (t,  $J = 6.8$  Hz, 2H), 1.97-1.87 (m, 2H) ppm.

$^{13}\text{C NMR}$  (100 MHz, acetone- $d_6$ )  $\delta$  157.2, 147.8, 138.5, 128.4, 128.0, 127.4, 126.5, 120.0, 115.2, 86.5, 84.6, 73.9, 25.4, 18.2, 16.1 ppm.

**HRMS** (CI+) Calcd for  $\text{C}_{19}\text{H}_{18}\text{NO}_2$  [ $\text{M}+\text{H}^+$ ]: 292.1338, Found: 292.1335.

**IR** (thin film) 3385, 2977, 2250, 1609, 1512, 1446, 1372, 1230, 835, 701  $\text{cm}^{-1}$ .

**4-(3-Cyclopropyl-1-hydroxy-1-phenylprop-2-yn-1-yl)phenol (1ab)** was prepared as

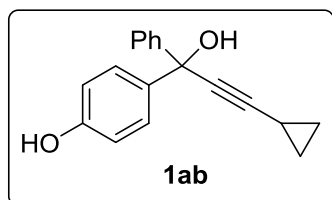

white solid according to the General Procedure B (purification by flash column chromatography: 20→30% EtOAc in hexanes, 88% yield).

$^1\text{H NMR}$  (400 MHz, acetone- $d_6$ )  $\delta$  8.29 (br s, 1H), 7.58 (d,  $J = 7.2$  Hz, 2H), 7.40 (d,  $J = 8.4$  Hz, 2H), 7.27 (t,  $J = 7.2$  Hz, 2H), 7.18 (t,  $J = 7.2$  Hz, 1H), 6.75 (d,  $J = 8.8$  Hz, 2H), 5.21 (br s, 1H), 1.42-1.35 (m, 1H), 0.85-0.75 (m, 2H), 0.58-0.68 (m, 2H) ppm.

$^{13}\text{C NMR}$  (100 MHz, acetone- $d_6$ )  $\delta$  156.9, 147.9, 138.5, 128.2, 127.8, 127.2, 126.4, 115.0, 89.8, 79.8, 73.7, 8.2, -0.3 ppm.

**IR** (thin film) 3355, 2236, 1613, 1511, 1448, 1235, 1171, 994, 836, 699  $\text{cm}^{-1}$ .

**HRMS** (CI+) Calcd for  $\text{C}_{18}\text{H}_{16}\text{O}_2$  [ $\text{M}^+$ ]: 264.1150, Found: 264.1150.

**4-(1-Hydroxy-4-methyl-1-phenylpent-2-yn-1-yl)phenol (1ac)** was prepared as white

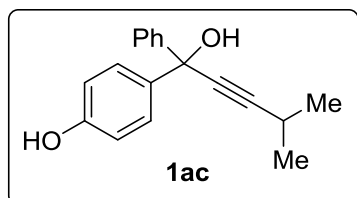

solid according to the General Procedure B (purification by flash column chromatography: 20→30% EtOAc in hexanes, 96% yield).

$^1\text{H NMR}$  (400 MHz, acetone- $d_6$ )  $\delta$  8.25 (br s, 1H), 7.62 (d,  $J = 7.2$  Hz, 2H), 7.44 (d,  $J = 8.8$  Hz, 2H), 7.28 (t,  $J = 7.6$  Hz, 2H), 7.19 (t,  $J = 7.6$  Hz, 1H), 6.76 (d,  $J = 8.8$  Hz, 2H), 5.23 (br s, 1H), 2.76-2.64 (m, 1H), 1.21 (s, 3H), 1.20 (s, 3H) ppm.

$^{13}\text{C}$  NMR (100 MHz, acetone- $d_6$ )  $\delta$  157.0, 148.0, 138.7, 128.2, 127.9, 127.2, 126.5, 115.0, 92.0, 84.2, 73.7, 23.0, 21.0 ppm.

IR (thin film) 3388, 2971, 1613, 1511, 1448, 1235, 1169, 994, 835, 699  $\text{cm}^{-1}$ .

HRMS (CI+) Calcd for  $\text{C}_{18}\text{H}_{18}\text{O}_2$  [ $\text{M}^+$ ]: 266.1307, Found: 266.1308.

**4-(1-Hydroxy-4,4-dimethyl-1-phenylpent-2-yn-1-yl)phenol (1ad)** was prepared as

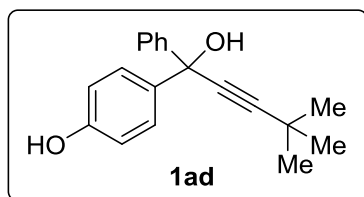

white solid according to the General Procedure B (purification by flash column chromatography: 20→30% EtOAc in hexanes, 86% yield).

$^1\text{H}$  NMR (400 MHz, acetone- $d_6$ )  $\delta$  8.25 (br s, 1H), 7.62 (d,  $J$  = 8.8 Hz, 2H), 7.45 (d,  $J$  = 8.4 Hz, 2H), 7.28 (t,  $J$  = 7.2 Hz, 2H), 7.18 (t,  $J$  = 7.2 Hz, 1H), 6.75 (d,  $J$  = 8.8 Hz, 2H), 5.23 (br s, 1H), 1.28 (s, 9H) ppm.

$^{13}\text{C}$  NMR (100 MHz, acetone- $d_6$ )  $\delta$  157.0, 148.2, 138.9, 128.3, 127.9, 127.3, 126.5, 115.1, 94.8, 83.7, 73.7, 31.0, 27.9 ppm.

IR (thin film) 3407, 2970, 1614, 1511, 1449, 1264, 1171, 1002, 832, 698  $\text{cm}^{-1}$ .

HRMS (CI+) Calcd for  $\text{C}_{19}\text{H}_{20}\text{O}_2$  [ $\text{M}^+$ ]: 280.1463, Found: 280.1458.

**4-(1-Hydroxy-3-phenyl-1-(4-(prop-2-yn-1-yloxy)phenyl)prop-2-yn-1-yl)phenol (1ae)**

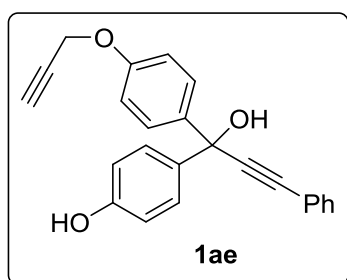

was prepared as brown oil according to the General Procedure B (purification by flash column chromatography: 20→30% EtOAc in hexanes, 75% yield).

$^1\text{H}$  NMR (400 MHz, acetone- $d_6$ )  $\delta$  8.36 (br s, 1H), 7.61 (d,  $J$  = 8.8 Hz, 2H), 7.51 (d,  $J$  = 8.8 Hz, 4H), 7.40-7.37 (m, 3H), 6.97 (d,  $J$  = 8.8 Hz, 2H), 6.81 (d,  $J$  = 8.8 Hz, 2H), 5.54 (br s, 1H), 4.77 (d,  $J$  = 2.4 Hz, 2H), 3.06 (t,  $J$  = 2.4 Hz, 1H) ppm.

$^{13}\text{C}$  NMR (100 MHz, acetone- $d_6$ )  $\delta$  157.4, 157.1, 140.3, 138.1, 131.9, 129.03, 128.97, 127.9, 127.8, 123.5, 115.1, 114.7, 94.0, 86.0, 79.5, 76.6, 73.8, 55.9 ppm.

IR (thin film) 3391, 3290, 1597, 1508, 1225, 1170, 1026, 836, 691  $\text{cm}^{-1}$ .

HRMS (CI+) Calcd for  $\text{C}_{24}\text{H}_{18}\text{O}_3$  [ $\text{M}^+$ ]: 354.1256, Found: 354.1245.

**4-(1-(3,5-Dimethoxyphenyl)-1-hydroxy-3-phenylprop-2-yn-1-yl)phenol (1af)** was

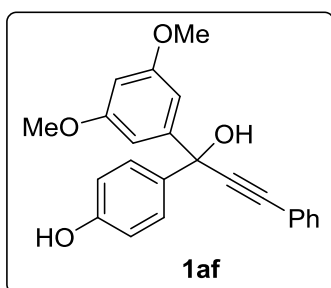

prepared as pale yellow solid according to the General Procedure B (purification by flash column chromatography: 20→30% EtOAc in hexanes, 85% yield).

$^1\text{H NMR}$  (400 MHz, acetone- $d_6$ )  $\delta$  8.34 (br s, 1H), 7.55-7.49 (m, 4H), 7.40-7.37 (m, 3H), 6.88-6.86 (m, 2H), 6.80 (d,  $J$  = 8.8

Hz, 2H), 6.39-6.37 (m, 1H), 5.58 (br s, 1H), 3.76 (s, 6H) ppm.

$^{13}\text{C NMR}$  (100 MHz, acetone- $d_6$ )  $\delta$  161.2, 157.3, 149.8, 137.8, 132.0, 129.13, 129.08, 127.9, 123.6, 115.2, 105.0, 99.0, 93.8, 86.0, 74.2, 55.3 ppm.

**IR** (thin film) 3417, 2974, 1597, 1511, 1458, 1204, 1155, 1052, 837, 759, 691  $\text{cm}^{-1}$ .

**HRMS** (CI+) Calcd for  $\text{C}_{23}\text{H}_{20}\text{O}_4$  [ $\text{M}^+$ ]: 360.1362, Found: 360.1372.

**4-(1-Hydroxy-1-phenylhept-2-yn-1-yl)-2-methylphenol (1ag)** was prepared as pale

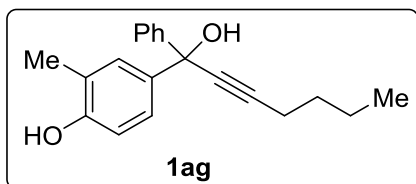

yellow solid according to the General Procedure B (purification by flash column chromatography: 20→30% EtOAc in hexanes, 89% yield).

$^1\text{H NMR}$  (400 MHz, acetone- $d_6$ )  $\delta$  8.12 (br s, 1H), 7.60

(d,  $J$  = 8.8 Hz, 2H), 7.34 (s, 1H), 7.30-7.23 (m, 3H), 7.18 (t,  $J$  = 7.2 Hz, 1H), 6.72 (d,  $J$  = 8.4 Hz, 1H), 5.16 (br s, 1H), 2.32 (d,  $J$  = 6.8 Hz, 2H), 2.16 (s, 3H), 1.59-1.42 (m, 4H), 0.92 (t,  $J$  = 7.2 Hz, 3H) ppm.

$^{13}\text{C NMR}$  (100 MHz, acetone- $d_6$ )  $\delta$  154.9, 148.1, 138.6, 129.3, 128.2, 127.2, 126.5, 125.2, 123.8, 114.3, 86.6, 85.0, 73.8, 31.3, 22.3, 18.6, 16.1, 13.6 ppm.

**IR** (thin film) 3386, 2957, 1610, 1505, 1449, 1260, 1114, 1012, 819, 699  $\text{cm}^{-1}$ .

**HRMS** (CI+) Calcd for  $\text{C}_{20}\text{H}_{22}\text{O}_2$  [ $\text{M}^+$ ]: 294.1620, Found: 294.1610.

## General Procedure C

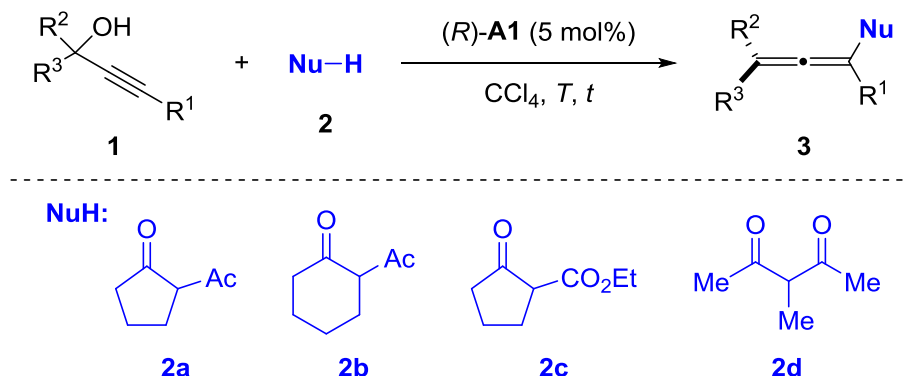

At room temperature, an oven-dried 10-mL vial was charged with a mixture of the alcohol substrate **1** (0.2 mmol), the carbon nucleophile **2** (0.3 mmol, 1.5 equiv), and  $\text{CCl}_4$  (3.8 mL). The reaction mixture was cooled to  $-20^\circ\text{C}$  (for **3a-j**) or  $0^\circ\text{C}$  (for **3k-p**) unless otherwise specified, and a solution of the catalyst  $(R)$ -A1 (10  $\mu\text{mol}$ , 5 mol%) in  $\text{CCl}_4$  (0.2 mL) was added in one portion. The reaction mixture was stirred at the same temperature. The progress was monitored by thin layer chromatography. Upon completion, the crude mixture was directly subjected to silica gel flash chromatography to afford the pure product **3**.

*Note:* All the racemic products (used for HPLC reference in determining the ee value), were prepared using the same reaction with the simplest racemic phosphoric acid catalyst or TsOH.

### **(R)**-2-Acetyl-2-((*R*)-1,3-bis(4-methoxyphenyl)-3-phenylpropa-1,2-dien-1-yl)cyclopentan-1-one (**3a**)

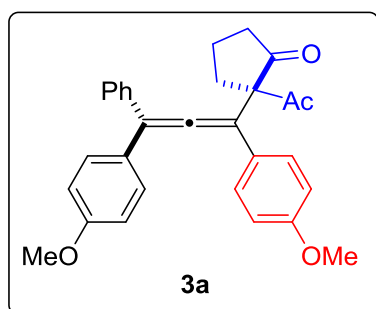

**ntan-1-one (3a)** was prepared as pale yellow oil from propargylic alcohol **1a** (0.2 mmol, 68.9 mg) and **2a** (0.3 mmol, 36.3  $\mu\text{L}$ ) according to General Procedure C (3 h, purified by flash column chromatography: 5-10%

EtOAc in hexanes, 80.6 mg, 89% yield, 6:1 d.r., 90% ee).

$[\alpha]_D^{25}$ : +218.7 ( $c = 1.0$ ,  $\text{CHCl}_3$ ). HPLC analysis of the product: Daicel CHIRALPAK AD-H column; 10% *i*-PrOH in hexanes; 1.0 mL/min; retention times: 7.3 min (major), 9.6 min (minor).

$^1\text{H NMR}$  (400 MHz,  $\text{CDCl}_3$ )  $\delta$  7.42-7.28 (m, 9H), 6.94 (d,  $J = 8.8$  Hz, 2H), 6.86 (d,  $J = 8.8$  Hz, 2H), 3.84 (s, 3H), 3.80 (s, 3H), 3.01-2.91 (m, 1H), 2.39 (s, 3H), 2.31-2.06 (m, 3H), 1.95-1.82 (m, 1H), 1.73-1.63 (m, 1H) ppm.

$^{13}\text{C NMR}$  (100 MHz,  $\text{CDCl}_3$ )  $\delta$  212.6, 206.9, 206.7, 159.3, 159.1, 136.4, 129.6, 129.1, 128.5, 128.4, 127.9, 127.8, 127.7, 125.6, 114.3, 113.9, 107.4, 71.1, 55.2 (2C), 37.9, 31.3, 28.4, 18.7 ppm.

IR (thin film) 2955, 1701, 1605, 1507, 1245, 1030, 906, 832, 730  $\text{cm}^{-1}$ .

HRMS (CI+) Calcd for  $\text{C}_{30}\text{H}_{28}\text{O}_4$  [ $\text{M}^+$ ]: 452.1988, Found: 452.1998.

**(*R*)-2-Acetyl-2-((*R*)-1-(4-chlorophenyl)-3-(4-methoxyphenyl)-3-phenylpropa-1,2-die**

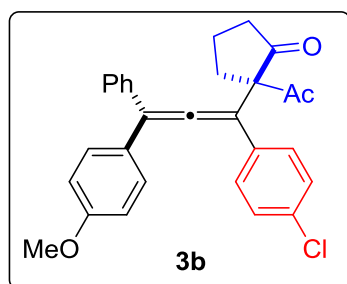

**n-1-yl)cyclopentan-1-one (3b)** was prepared as pale yellow foam from propargylic alcohol **1b** (0.2 mmol, 69.6 mg) **2a** (0.3 mmol, 36.3  $\mu\text{L}$ ) according to General Procedure C (3 h, purified by flash column

chromatography: 5-10% EtOAc in hexanes, 81.6 mg, 90% yield, 7:1 d.r., 94% ee).

$[\alpha]_D^{25}$ : +236.0 ( $c = 1.0$ ,  $\text{CHCl}_3$ ). HPLC analysis of the product: Daicel CHIRALPAK AD-H column; 5% *i*-PrOH in hexanes; 1.0 mL/min; retention times: 7.3 min (major), 9.3 min (minor).

$^1\text{H NMR}$  (400 MHz,  $\text{CDCl}_3$ )  $\delta$  7.48-7.31 (m, 7H), 7.31-7.26 (m, 4H), 6.94 (d,  $J = 8.8$  Hz, 2H), 3.83 (s, 3H), 3.01-2.91 (m, 1H), 2.35 (s, 3H), 2.25-2.12 (m, 3H), 1.94-1.82 (m, 1H), 1.72-1.61 (m, 1H) ppm.

$^{13}\text{C NMR}$  (100 MHz,  $\text{CDCl}_3$ )  $\delta$  212.2, 207.2, 206.2, 159.5, 135.8, 133.5, 132.2, 129.5, 129.0, 128.6, 128.0, 127.9, 127.8, 127.0, 114.6, 114.0, 107.1, 70.9, 55.2, 37.9, 31.4, 28.2, 18.7 ppm.

IR (thin film) 2960, 1702, 1605, 1508, 1246, 1031, 906, 830, 697  $\text{cm}^{-1}$ .

HRMS (CI+) Calcd for  $\text{C}_{29}\text{H}_{25}^{35}\text{ClO}_3$  [ $\text{M}^+$ ]: 456.1492, Found: 456.1482.

**(R)-2-Acetyl-2-((S)-1-(furan-2-yl)-3-(4-methoxyphenyl)-3-phenylpropa-1,2-dien-1-yl)cyclopentan-1-one (3c)**

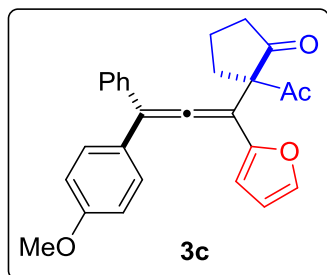

**cyclopentan-1-one (3c)** was prepared as pale yellow foam from propargylic alcohol **1c** (0.2 mmol, 60.8 mg) **2a** (0.3 mmol, 36.3  $\mu\text{L}$ ) according to General Procedure C (3 h, purified by flash column chromatography: 5-10% EtOAc in

hexanes, 75.8 mg, 92% yield, 7:1 d.r., 77% ee).

$[\alpha]_{\text{D}}^{25}$ : +167.2 ( $c = 1.0$ ,  $\text{CHCl}_3$ ). HPLC analysis of the product: Daicel CHIRALPAK AD-H column; 3% EtOH in hexanes; 0.5 mL/min; retention times: 14.4 min (major), 18.6 min (minor).

$^1\text{H NMR}$  (400 MHz,  $\text{CDCl}_3$ )  $\delta$  7.48-7.27 (m, 8H), 6.93 (d,  $J = 8.8$  Hz, 2H), 6.40-6.38 (m, 1H), 6.27-6.25 (m, 1H), 3.83 (s, 3H), 2.91-2.82 (m, 1H), 2.40 (s, 3H), 2.25-2.05 (m, 3H), 1.91-1.81 (m, 1H), 1.70-1.59 (m, 1H) ppm.

$^{13}\text{C NMR}$  (100 MHz,  $\text{CDCl}_3$ )  $\delta$  212.1, 205.6, 205.1, 159.5, 147.1, 142.5, 136.2, 129.7, 128.5, 128.4, 128.0, 127.6, 115.3, 114.0, 111.5, 108.3, 100.9, 70.4, 55.3, 37.9, 31.3, 27.9, 18.8 ppm.

IR (thin film) 2961, 1704, 1604, 1508, 1246, 1028, 904, 833, 696  $\text{cm}^{-1}$ .

HRMS (CI+) Calcd for  $\text{C}_{27}\text{H}_{24}\text{O}_4$  [ $\text{M}^+$ ]: 412.1675, Found: 412.1674.

**(R)-2-Acetyl-2-((R)-3-(4-(allyloxy)phenyl)-1-(4-chlorophenyl)-3-phenylpropa-1,2-dien-1-yl)cyclopentan-1-one (3d)**

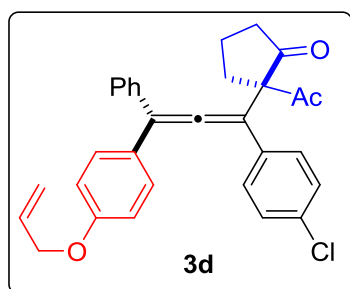

**en-1-yl)cyclopentan-1-one (3d)** was prepared as pale yellow foam from propargylic alcohol **1d** (0.2 mmol, 74.8 mg) **2a** (0.3 mmol, 36.3  $\mu\text{L}$ ) according to General Procedure C (3 h, purified by flash column



chromatography: 5-10% EtOAc in hexanes, 90.6 mg, 94% yield, 6:1 d.r., 92% ee).

$[\alpha]_D^{25}$ : +156.6 ( $c = 1.0$ ,  $\text{CHCl}_3$ ). HPLC analysis of the product: Daicel CHIRALPAK AD-H column; 3% EtOH in hexanes; 0.5 mL/min; retention times: 12.4 min (major), 20.9 min (minor).

$^1\text{H NMR}$  (400 MHz,  $\text{CDCl}_3$ )  $\delta$  7.47-7.23 (m, 11H), 6.95 (d,  $J = 8.8$  Hz, 2H), 6.12-6.01 (m, 1H), 5.43 (d,  $J = 17.2$  Hz, 1H), 5.30 (d,  $J = 10.8$  Hz, 1H), 4.57 (d,  $J = 5.2$  Hz, 2H), 2.99-2.90 (m, 1H), 2.34 (s, 3H), 2.27-2.12 (m, 3H), 1.94-1.82 (m, 1H), 1.71-1.59 (m, 1H) ppm.

$^{13}\text{C NMR}$  (100 MHz,  $\text{CDCl}_3$ )  $\delta$  212.2, 207.2, 206.3, 158.6, 135.9, 133.5, 133.1, 132.3, 129.5, 129.0, 128.6, 128.1, 127.94, 127.89, 127.2, 117.7, 114.8, 114.6, 107.1, 70.9, 68.8, 37.9, 31.5, 28.3, 18.8 ppm.

IR (thin film) 2967, 1702, 1604, 1507, 1243, 1175, 1010, 915, 830, 700  $\text{cm}^{-1}$ .

HRMS (CI+) Calcd for  $\text{C}_{31}\text{H}_{27}^{35}\text{ClO}_3$  [ $\text{M}^+$ ]: 482.1649, Found: 482.1635.

**(R)-2-Acetyl-2-((R)-1-(4-methoxyphenyl)-3-(4-(methylthio)phenyl)-3-phenylpropa-**

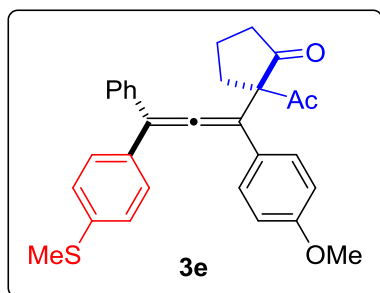

**1,2-dien-1-yl)cyclopentan-1-one (3e)** was prepared as pale yellow oil from propargylic alcohol **1e** (0.2 mmol, 72.1 mg) **2a** (0.3 mmol, 36.3  $\mu\text{L}$ ) according to General Procedure C (3 h, purified by flash column

chromatography: 5-10% EtOAc in hexanes, 89.9 mg, 96% yield, 6:1 d.r., 84% ee).

$[\alpha]_D^{25}$ : +213.8 ( $c = 1.0$ ,  $\text{CHCl}_3$ ). HPLC analysis of the product: Daicel CHIRALPAK AD-H column; 10% *i*-PrOH in hexanes; 1.0 mL/min; retention times: 7.7 min (major), 10.4 min (minor).

$^1\text{H NMR}$  (400 MHz,  $\text{CDCl}_3$ )  $\delta$  7.49-7.30 (m, 7H), 7.30-7.21 (m, 4H), 6.87 (d,  $J = 8.8$  Hz, 2H), 3.81 (s, 3H), 3.02-2.93 (m, 1H), 2.52 (s, 3H), 2.38 (s, 3H), 2.31-2.07 (m, 3H), 1.96-1.84 (m, 1H), 1.74-1.61 (m, 1H) ppm.

$^{13}\text{C}$  NMR (100 MHz,  $\text{CDCl}_3$ )  $\delta$  212.5, 206.8, 206.6, 159.2, 138.3, 136.0, 132.1, 128.7, 128.6, 128.4, 127.9, 127.8, 126.4, 125.3, 114.3, 114.0, 107.8, 71.1, 55.2, 37.9, 31.4, 28.4, 18.8, 15.6 ppm.

IR (thin film) 2957, 1702, 1604, 1509, 1248, 1029, 906, 831, 730  $\text{cm}^{-1}$ .

HRMS (CI+) Calcd for  $\text{C}_{30}\text{H}_{28}\text{O}_3\text{S}$  [ $\text{M}^+$ ]: 468.1759, Found: 468.1773.

**(R)-2-Acetyl-2-(3,3-bis(4-methoxyphenyl)-1-phenylpropa-1,2-dien-1-yl)cyclopentan-1-one (3e)**

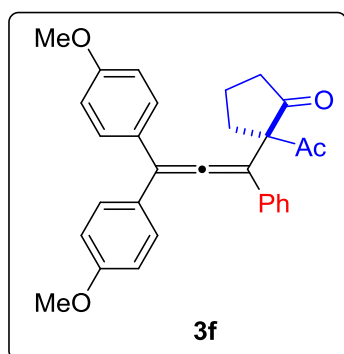

**-1-one (3e)** was prepared as pale yellow oil from propargylic alcohol **1f** (0.2 mmol, 68.9 mg) and **2a** (0.3 mmol, 36.3  $\mu\text{L}$ ) according to General Procedure C (2 h, purified by flash column chromatography: 5-10% EtOAc in hexanes, 88.5 mg, 98% yield, 86% ee).

$[\alpha]_{\text{D}}^{25}$ : +179.2 ( $c = 1.0$ ,  $\text{CHCl}_3$ ). HPLC analysis of the product: Daicel CHIRALPAK AD-H column; 10% *i*-PrOH in hexanes; 1.0 mL/min; retention times: 9.3 min (major), 16.5 min (minor).

$^1\text{H}$  NMR (400 MHz,  $\text{CDCl}_3$ )  $\delta$  7.40 (d,  $J = 8.8$  Hz, 2H), 7.35-7.21 (m, 7H), 6.93 (d,  $J = 8.8$  Hz, 2H), 6.89 (d,  $J = 8.8$  Hz, 2H), 3.83 (s, 3H), 3.82 (s, 3H), 3.01-2.92 (m, 1H), 2.37 (s, 3H), 2.31-2.07 (m, 3H), 1.93-1.83 (m, 1H), 1.74-1.67 (m, 1H) ppm.

$^{13}\text{C}$  NMR (100 MHz,  $\text{CDCl}_3$ )  $\delta$  212.8, 206.9 (2C), 159.4 (2C), 133.8, 129.6, 129.1, 128.9, 128.2, 127.7, 127.6, 126.6, 114.0, 113.9, 113.8, 107.5, 71.1, 55.3 (2C), 37.9, 31.3, 28.6, 18.8 ppm.

IR (thin film) 2956, 1702, 1605, 1507, 1244, 1172, 1029, 832, 696  $\text{cm}^{-1}$ .

HRMS (CI+) Calcd for  $\text{C}_{30}\text{H}_{28}\text{O}_4$  [ $\text{M}^+$ ]: 452.1988, Found: 452.1989.

**(R)-2-Acetyl-2-((S)-1-(4-chlorophenyl)-3-(4-methoxyphenyl)-3-(thiophen-2-yl)propa**

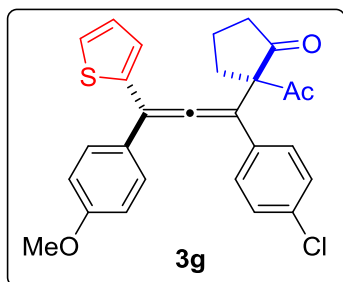

**-1,2-dien-1-yl)cyclopentan-1-one (3g)** was prepared as yellow oil from propargylic alcohol **1g** (0.2 mmol, 70.7 mg) **2a** (0.3 mmol, 36.3  $\mu$ L) according to General Procedure C (3 h, purified by flash column

chromatography: 5-10% EtOAc in hexanes, 78.6 mg, 85% yield, 5:1 d.r., 96% ee).

$[\alpha]_D^{25}$ : +189.1 ( $c = 1.0$ ,  $\text{CHCl}_3$ ). HPLC analysis of the product: Daicel CHIRALPAK AD-H column; 5% *i*-PrOH in hexanes; 1.0 mL/min; retention times: 8.9 min (major), 15.4 min (minor).

$^1\text{H NMR}$  (400 MHz,  $\text{CDCl}_3$ )  $\delta$  7.49 (d,  $J = 8.8$  Hz, 2H), 7.31-7.24 (m, 5H), 7.11-6.91 (m, 4H), 3.85 (s, 3H), 2.98-2.90 (m, 1H), 2.42-2.18 (m, 3H), 2.33 (s, 3H), 2.01-1.89 (m, 2H) ppm.

$^{13}\text{C NMR}$  (100 MHz,  $\text{CDCl}_3$ )  $\delta$  211.8, 207.3, 206.2, 159.7, 139.0, 133.8, 132.1, 129.5, 129.0, 128.3, 127.8, 126.9, 126.8, 125.5, 114.0, 109.6, 107.2, 71.0, 55.3, 37.9, 31.3, 28.2, 18.9 ppm.

IR (thin film) 2958, 1702, 1605, 1508, 1247, 1030, 911, 828, 700  $\text{cm}^{-1}$ .

HRMS (CI+) Calcd for  $\text{C}_{27}\text{H}_{23}^{35}\text{ClO}_3\text{S}$  [ $\text{M}^+$ ]: 462.1056, Found: 462.1052.

**(R)-2-Acetyl-2-((R)-1-(4-chlorophenyl)-3-(4-methoxyphenyl)-3-phenylpropa-1,2-die**

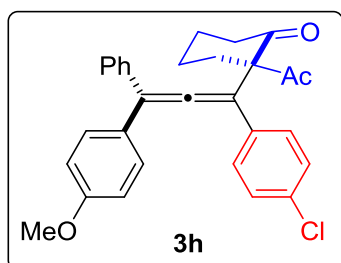

**n-1-yl)cyclohexan-1-one (3h)** was prepared as pale yellow foam from propargylic alcohol **1b** (0.2 mmol, 69.6 mg) and **2b** (0.3 mmol, 39.0  $\mu$ L) with 200 mg anhydrous  $\text{MgSO}_4$  according to General Procedure C (rt, 36 h,

purified by flash column chromatography: 5-10% EtOAc in hexanes, 58.3 mg, 62% yield, 6:1 d.r., 90% ee).

$[\alpha]_{\text{D}}^{25}$ : +41.9 ( $c = 1.0$ ,  $\text{CHCl}_3$ ). HPLC analysis of the product: Daicel CHIRALPAK AD-H column; 5% *i*-PrOH in hexanes; 1.0 mL/min; retention times: 8.6 min (major), 12.0 min (minor).

$^1\text{H NMR}$  (400 MHz,  $\text{CDCl}_3$ )  $\delta$  7.48-7.21 (m, 11H), 6.89 (d,  $J = 8.8$  Hz, 2H), 3.81 (s, 3H), 2.61-2.49 (m, 2H), 2.49-2.39 (m, 1H), 2.21-2.10 (m, 1H), 2.12 (s, 3H), 1.89-1.83 (m, 1H), 1.82-1.68 (m, 2H), 1.68-1.56 (m, 1H) ppm.

$^{13}\text{C NMR}$  (100 MHz,  $\text{CDCl}_3$ )  $\delta$  209.0, 208.0, 207.8, 159.4, 135.5, 133.4, 133.1, 129.6, 129.1, 128.74, 128.71, 128.1, 128.0, 127.1, 114.1, 113.8, 108.4, 71.1, 55.3, 41.2, 34.2, 27.7, 27.1, 21.6 ppm.

IR (thin film) 2939, 1699, 1604, 1508, 1246, 1175, 1030, 905, 831, 729  $\text{cm}^{-1}$ .

HRMS (CI+) Calcd for  $\text{C}_{30}\text{H}_{27}^{35}\text{ClO}_3$  [ $\text{M}^+$ ]: 470.1649, Found: 470.1651.

**Ethyl (S)-1-((R)-1-(4-chlorophenyl)-3-(4-methoxyphenyl)-3-phenylpropa-1,2-dien-**

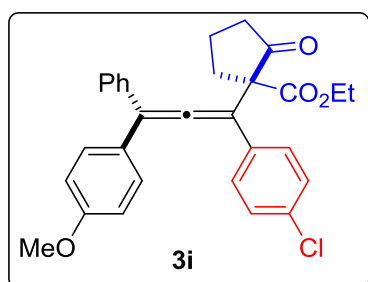

**1-yl)-2-oxocyclopentane-1-carboxylate (3i)** was

prepared as pale yellow foam from propargylic alcohol

**1b** (0.2 mmol, 69.6 mg) and **2c** (0.3 mmol, 44.5  $\mu\text{L}$ )

according to General Procedure C ( $-15^\circ\text{C}$ , 24 h, purified

by flash column chromatography: 10% EtOAc and 20%  $\text{CH}_2\text{Cl}_2$  in hexanes, 87.5 mg,

90% yield, 10:1 d.r., 82% ee).

$[\alpha]_{\text{D}}^{25}$ : +156.1 ( $c = 1.0$ ,  $\text{CHCl}_3$ ). HPLC analysis of the product: Daicel CHIRALPAK IC column; 5% *i*-PrOH in hexanes; 1.0 mL/min; retention times: 8.5 min (minor), 10.8 min (major).

$^1\text{H NMR}$  (400 MHz,  $\text{CDCl}_3$ )  $\delta$  7.48-7.26 (m, 11H), 6.89 (d,  $J = 8.8$  Hz, 2H), 4.35-4.17 (m, 2H), 3.82 (s, 3H), 2.78-2.69 (m, 1H), 2.40-2.34 (m, 1H), 2.23-2.13 (m, 1H), 2.04-1.95 (m, 1H), 1.95-1.87 (m, 1H), 1.70-1.62 (m, 1H), 1.24 (t,  $J = 7.2$  Hz, 3H) ppm.

$^{13}\text{C}$  NMR (100 MHz,  $\text{CDCl}_3$ )  $\delta$  210.6, 206.8, 170.6, 159.4, 135.8, 133.2, 132.4, 129.7, 128.7, 128.6, 128.3, 128.1, 128.0, 127.1, 114.3, 113.9, 105.8, 64.6, 62.0, 55.3, 36.4, 33.0, 18.9, 14.0 ppm.

IR (thin film) 2977, 1718, 1605, 1509, 1246, 1176, 1029, 906, 831, 699  $\text{cm}^{-1}$ .

HRMS (CI+) Calcd for  $\text{C}_{30}\text{H}_{27}^{35}\text{ClO}_3$  [ $\text{M}^+$ ]: 486.1598, Found: 486.1581.

**(R)-3-(1-(4-Chlorophenyl)-3-(4-methoxyphenyl)-3-phenylpropa-1,2-dien-1-yl)-3-methylpentane-2,4-dione (3j)**

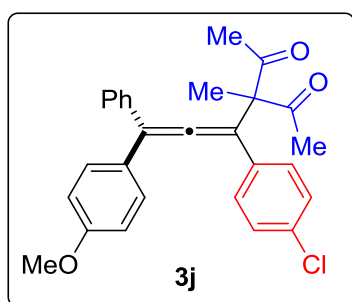

**thylpentane-2,4-dione (3j)** was prepared as pale yellow foam from propargylic alcohol **1b** (0.2 mmol, 69.6 mg) and **2d** (0.3 mmol, 34.9  $\mu\text{L}$ ) according to General Procedure C (0  $^\circ\text{C}$ , 10 h, purified by flash column

chromatography: 5-10% EtOAc in hexanes, 72.1 mg, 81% yield, 78% ee).

$[\alpha]_{\text{D}}^{25}$ : +74.5 ( $c = 1.0$ ,  $\text{CHCl}_3$ ). HPLC analysis of the product: Daicel CHIRALPAK AD-H column; 5% *i*-PrOH in hexanes; 1.0 mL/min; retention times: 8.4 min (major), 9.8 min (minor).

$^1\text{H}$  NMR (400 MHz,  $\text{CDCl}_3$ )  $\delta$  7.41-7.37 (m, 4H), 7.37-7.21 (m, 7H), 6.92 (d,  $J = 8.8$  Hz, 2H), 3.83 (s, 3H), 2.17 (s, 6H), 1.65 (m, 3H) ppm.

$^{13}\text{C}$  NMR (100 MHz,  $\text{CDCl}_3$ )  $\delta$  207.2, 207.1 (2C), 159.5, 135.4, 133.5, 132.9, 129.4, 128.8, 128.76, 128.68, 128.2, 128.0, 127.1, 114.2, 114.0, 108.8, 68.7, 55.3, 27.8, 27.7, 20.3 ppm.

IR (thin film) 2933, 1701, 1604, 1508, 1247, 1090, 906, 831, 730  $\text{cm}^{-1}$ .

HRMS (CI+) Calcd for  $\text{C}_{28}\text{H}_{25}^{35}\text{ClO}_3$  [ $\text{M}^+$ ]: 444.1492, Found: 444.1495.

**(R)-2-Acetyl-2-((S)-3-(2-fluorophenyl)-3-(4-hydroxyphenyl)-1-phenylpropa-1,2-dien-1-yl)cyclopentan-1-one (3k)** was prepared as pale yellow solid from propargylic alcohol **1h** (0.2 mmol, 63.8 mg) according to General Procedure C (purified by flash column chromatography: 10-20% EtOAc in hexanes, 65.3 mg, 75% yield, 21:1 d.r., 94% ee).

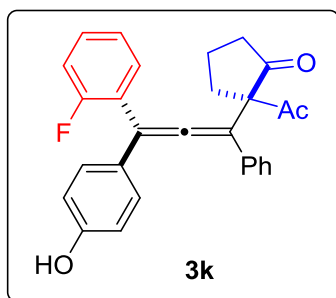

$[\alpha]_{\text{D}}^{25}$ : +103.7 ( $c = 1.0$ ,  $\text{CHCl}_3$ ). HPLC analysis of the product: Daicel CHIRALPAK IC column; 5% *i*-PrOH in hexanes; 1.0 mL/min; retention times: 20.7 min (major), 26.5 min (minor).

$^1\text{H NMR}$  (400 MHz,  $\text{CD}_2\text{Cl}_2$ )  $\delta$  7.39-7.31 (m, 6H),  $\delta$  7.31-7.21 (m, 1H),  $\delta$  7.21-7.13 (m, 4H), 6.82 (d,  $J = 8.8$  Hz, 2H), 6.23 (s br, 1H), 2.98-2.91 (m, 1H), 2.35 (s, 3H), 2.31-2.25 (m, 2H), 2.25-2.18 (m, 1H), 1.91-1.82 (m, 1H), 1.71-1.59 (m, 1H) ppm.

$^{13}\text{C NMR}$  (100 MHz,  $\text{CD}_2\text{Cl}_2$ )  $\delta$  213.7, 207.3, 206.7, 160.6 (d,  $J_{\text{C-F}} = 123.2$  Hz), 156.5, 134.0, 131.6 (d,  $J_{\text{C-F}} = 3$  Hz), 130.2 (d,  $J_{\text{C-F}} = 8$  Hz), 129.2, 129.0, 128.2, 127.3, 127.1, 124.8 (d,  $J_{\text{C-F}} = 3$  Hz), 124.0 (d,  $J_{\text{C-F}} = 15$  Hz), 116.4 (d,  $J_{\text{C-F}} = 22$  Hz), 116.0, 108.7, 108.5, 71.7, 38.8, 32.6, 28.5, 19.4 ppm.

$^{19}\text{F NMR}$  (376 MHz,  $\text{CD}_2\text{Cl}_2$ )  $\delta$  -112.9 ppm.

IR (thin film) 3569, 2950, 1665, 1508, 1259, 1103, 832  $\text{cm}^{-1}$ .

HRMS (CI<sup>+</sup>) Calcd for  $\text{C}_{28}\text{H}_{23}\text{FO}_3$  [ $\text{M}^+$ ]: 426.1631, Found: 426.1629.

**(*R*)-2-Acetyl-2-((*R*)-3-(4-hydroxyphenyl)-1,3-diphenylpropa-1,2-dien-1-yl)cyclopentan-1-one (3l)**

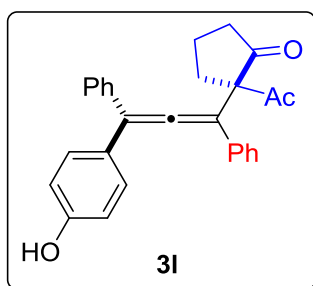

**an-1-one (3l)** was prepared as pale yellow solid from propargylic alcohol **1i** (0.2 mmol, 60.1 mg) according to General Procedure C (purified by flash column chromatography: 10-20% EtOAc in hexanes, 69.5 mg, 85% yield, 16:1 d.r., 94% ee).

$[\alpha]_{\text{D}}^{25}$ : +217.9 ( $c = 1.0$ ,  $\text{CHCl}_3$ ). HPLC analysis of the product: Daicel CHIRALPAK AD-H column; 10% *i*-PrOH in hexanes; 0.5 mL/min; retention times: 20.7 min (minor), 21.6 min (major).

$^1\text{H NMR}$  (400 MHz,  $\text{CD}_2\text{Cl}_2$ )  $\delta$  7.38-7.19 (m, 12H), 6.85 (d,  $J = 8.4$  Hz, 2H), 6.02 (br s, 1H), 2.96-2.87 (m, 1H), 2.33 (s, 3H), 2.31-2.17 (m, 3H), 1.93-1.82 (m, 1H), 1.75-1.62 (m, 1H) ppm.

$^{13}\text{C}$  NMR (100 MHz,  $\text{CD}_2\text{Cl}_2$ )  $\delta$  213.7, 207.6, 207.1, 156.4, 136.5, 134.2, 130.1, 129.3, 129.0, 128.5, 128.4, 128.1, 127.7, 127.2, 115.9, 114.7, 108.3, 71.6, 38.4, 32.1, 28.7, 19.2 ppm.

IR (thin film) 3435, 1703, 1610, 1511, 1216, 763, 696  $\text{cm}^{-1}$ .

HRMS (CI+) Calcd for  $\text{C}_{28}\text{H}_{24}\text{O}_3$  [ $\text{M}^+$ ]: 408.1725, Found: 408.1720.

**(R)-2-Acetyl-2-((R)-3-(4-hydroxyphenyl)-1-(4-methoxyphenyl)-3-phenylpropa-1,2-dien-1-yl)cyclopentan-1-one (3m)** was prepared as pale

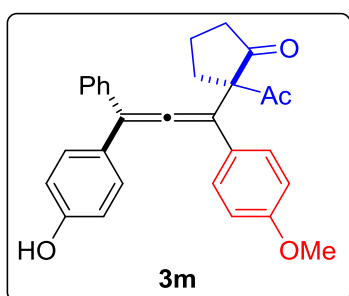

yellow solid from propargylic alcohol **1j** (0.2 mmol, 66.1 mg) according to General Procedure C (purified by flash column chromatography: 10-20% EtOAc in hexanes, 71.0 mg, 81% yield, 10:1 d.r., 94% ee).

$[\alpha]_{\text{D}}^{25}$ : +170.7 ( $c = 1.0$ ,  $\text{CHCl}_3$ ). HPLC analysis of the product: Daicel CHIRALPAK IC column; 5% EtOH in hexanes; 0.5 mL/min; retention times: 23.4 min (major), 24.4 min (minor).

$^1\text{H}$  NMR (400 MHz,  $\text{CD}_2\text{Cl}_2$ )  $\delta$  7.46-7.17 (m, 9H), 6.87-6.83 (m, 4H), 3.78 (s, 3H), 2.93-2.83 (m, 1H), 2.32 (s, 3H), 2.28-2.05 (m, 3H), 1.99-1.83 (m, 1H), 1.73-1.59 (m, 1H) ppm.

$^{13}\text{C}$  NMR (100 MHz,  $\text{CD}_2\text{Cl}_2$ )  $\delta$  213.6, 207.0 (2C), 159.7, 156.2, 136.7, 130.1, 129.8, 129.0, 128.4, 128.2, 128.0, 126.1, 115.8, 114.7, 114.4, 108.0, 71.7, 55.7, 38.4, 32.0, 28.6, 19.2 ppm.

IR (thin film) 3362, 1695, 1607, 1508, 1355, 1252, 1178, 831, 754  $\text{cm}^{-1}$ .

HRMS (CI+) Calcd for  $\text{C}_{29}\text{H}_{26}\text{O}_4$  [ $\text{M}^+$ ]: 438.1831, Found: 438.1815.

**(R)-2-Acetyl-2-((R)-1-(4-chlorophenyl)-3-(4-hydroxyphenyl)-3-phenylpropa-1,2-dien-1-yl)cyclopentan-1-one (3n)** was prepared as pale yellow solid from propargylic alcohol **1k** (0.2 mmol, 67.3 mg) according to General Procedure C (purified by flash column chromatography: 10-20% EtOAc in hexanes, 84.2 mg, 94% yield, 13:1 d.r., 97% ee).

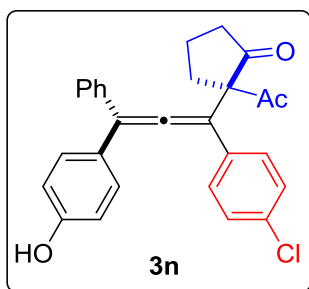

$[\alpha]_{\text{D}}^{25}$ : +253.3 ( $c = 1.0$ ,  $\text{CHCl}_3$ ). HPLC analysis of the product: Daicel CHIRALPAK AD-H column; 10% *i*-PrOH in hexanes; 0.5 mL/min; retention times: 21.9 min (minor), 23.7 min (major).

$^1\text{H NMR}$  (400 MHz,  $\text{CD}_2\text{Cl}_2$ )  $\delta$  7.41-7.21 (m, 11H), 6.85 (d,  $J = 8.4$  Hz, 2H), 5.77 (br s, 1H), 2.93-2.85 (m, 1H), 2.29 (s, 3H), 2.26-2.09 (m, 3H), 1.92-1.79 (m, 1H), 1.70-1.59 (m, 1H) ppm.

$^{13}\text{C NMR}$  (100 MHz,  $\text{CD}_2\text{Cl}_2$ )  $\delta$  213.4, 207.7, 206.7, 156.5, 136.2, 133.8, 133.0, 130.2, 129.4, 129.1, 128.6, 128.49, 128.47, 127.4, 115.9, 115.0, 114.4, 107.6, 71.5, 38.4, 32.2, 28.5, 19.3 ppm.

IR (thin film) 3584, 1704, 1610, 1511, 1353, 1215, 1172, 834, 697  $\text{cm}^{-1}$ .

HRMS (CI+) Calcd for  $\text{C}_{28}\text{H}_{23}^{35}\text{ClO}_3$  [ $\text{M}^+$ ]: 442.1336, Found: 442.1322.

**(*R*)-2-Acetyl-2-((*S*)-1-(furan-2-yl)-3-(4-hydroxyphenyl)-3-phenylpropa-1,2-dien-1-yl)**

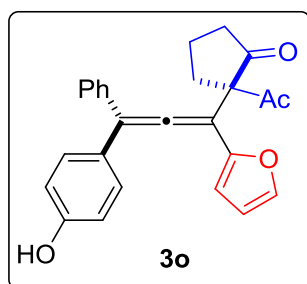

**cyclopentan-1-one (3o)** was prepared as white solid from propargylic alcohol **11** (0.2 mmol, 58.1 mg) according to General Procedure C (purified by flash column chromatography: 10-20% EtOAc in hexanes, 71.7 mg, 90% yield, 12:1 d.r., 93% ee).

$[\alpha]_{\text{D}}^{25}$ : +177.7 ( $c = 1.0$ ,  $\text{CHCl}_3$ ). HPLC analysis of the product: Daicel CHIRALPAK AD-H column; 10% *i*-PrOH in hexanes; 1.0 mL/min; retention times: 12.9 min (minor), 13.7 min (major).

$^1\text{H NMR}$  (400 MHz,  $\text{CD}_2\text{Cl}_2$ )  $\delta$  7.46-7.16 (m, 8H), 6.86 (d,  $J = 8.0$  Hz, 2H), 6.42 (s, 1H), 6.35-6.15 (m, 2H), 2.91-2.78 (m, 1H), 2.38 (s, 3H), 2.27-2.16 (m, 2H), 2.15-2.05 (m, 1H), 1.91-1.79 (m, 1H), 1.71-1.59 (m, 1H) ppm.

$^{13}\text{C NMR}$  (100 MHz,  $\text{CD}_2\text{Cl}_2$ )  $\delta$  213.3, 206.0, 205.7, 156.6, 147.5, 143.1, 136.5, 130.3, 129.0, 128.8, 128.5, 127.6, 115.9, 112.0, 108.9, 101.4, 70.9, 38.4, 32.0, 28.1, 19.3 ppm.

IR (thin film) 3393, 3022, 2968, 1702, 1507, 1217, 1019, 830, 755  $\text{cm}^{-1}$ .

HRMS (CI+) Calcd for  $\text{C}_{26}\text{H}_{22}\text{O}_4$  [ $\text{M}^+$ ]: 398.1518, Found: 398.1515.



**(R)-2-Acetyl-2-((S)-3-(4-hydroxyphenyl)-3-phenyl-1-(thiophen-3-yl)propa-1,2-dien-**

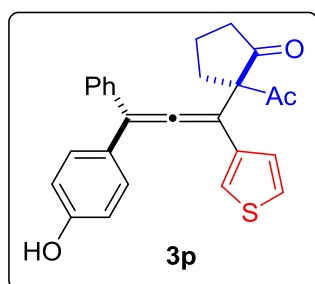

**1-yl)cyclopentan-1-one (3p)** was prepared as pale yellow solid from propargylic alcohol **1m** (0.2 mmol, 61.3 mg) according to General Procedure C (purified by flash column chromatography: 10-20% EtOAc in hexanes, 71.1 mg, 86% yield, 13:1 dr, 94% ee).

$[\alpha]_D^{25}$ : +185.7 ( $c = 1.0$ ,  $\text{CHCl}_3$ ). HPLC analysis of the product: Daicel CHIRALPAK AD-H column; 10% *i*-PrOH in hexanes; 1.0 mL/min; retention times: 12.6 min (minor), 14.2 min (major).

$^1\text{H NMR}$  (400 MHz,  $\text{CD}_2\text{Cl}_2$ )  $\delta$  7.52-7.28 (m, 8H), 7.14 (d,  $J = 5.2$  Hz, 1H), 7.05-7.03 (m, 1H), 6.85 (d,  $J = 8.8$  Hz, 2H), 5.85 (s br, 1H), 2.91-2.81 (m, 1H), 2.36-2.29 (m, 1H), 2.35 (s, 3H), 2.29-2.16 (m, 1H), 2.16-2.10 (m, 1H), 1.88-1.68 (m, 1H), 1.71-1.61 (m, 1H) ppm.

$^{13}\text{C NMR}$  (100 MHz,  $\text{CD}_2\text{Cl}_2$ )  $\delta$  213.4, 207.2, 206.9, 156.3, 136.5, 135.0, 130.2, 130.0, 128.6, 128.3, 127.8, 127.6, 126.4, 121.6, 114.2, 104.7, 71.8, 38.4, 31.8, 28.3, 19.2 ppm.

IR (thin film) 3437, 1697, 1508, 1214, 757  $\text{cm}^{-1}$ .

HRMS (CI+) Calcd for  $\text{C}_{26}\text{H}_{22}\text{O}_3\text{S}$  [ $\text{M}^+$ ]: 414.1290, Found: 414.1292.

### General Procedure D

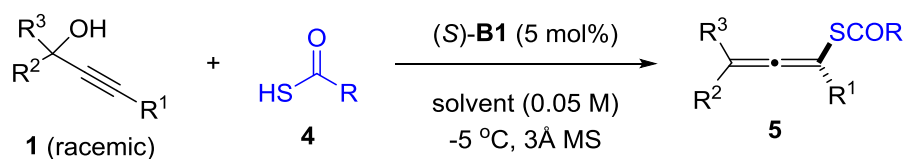

R = Me (**4a**), R = Ph (**4b**)

At room temperature, an oven-dried 10-mL vial was charged with a mixture of the alcohol substrate **1** (0.3 mmol), 3 Å molecular sieves (90 mg), and the solvent (6.0 mL, toluene for **5a-g** and DCM for others, or noted otherwise). The reaction mixture was cooled to  $-5$  °C, and a solution of the catalyst (*S*)-**B1**<sup>6</sup> (0.015 mmol, 5 mol%) in the same solvent (0.2 mL) and thioacetic acid **4a** (0.6 mmol, 42.9  $\mu\text{L}$ ) were added in one

portion. The reaction progress was monitored by thin layer chromatography. Upon completion, the reaction mixture was directly subjected to silica gel column flash chromatography (the column was pretreated with 10% AcOH in hexanes) to afford the desired product **5**.

*Note:* All the racemic products (used for HPLC reference in ee determination), were prepared using the same reaction with the simplest racemic phosphoric acid catalyst.

**(R)-S-(3-(4-Hydroxyphenyl)-1,3-diphenylpropa-1,2-dien-1-yl) ethanethioate (5a)**

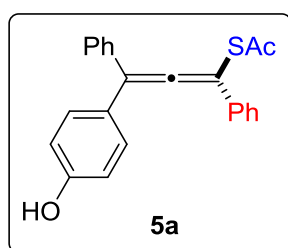

was prepared as brown oil from substrate **1i** (0.3 mmol, 90.2 mg) according to the General Procedure D (purified by flash column chromatography: 10% EtOAc and 1% AcOH in hexanes, 88.1 mg, 82% yield, 94% ee).

$[\alpha]_{\text{D}}^{25}$ : +12.2 ( $c = 1.0$ ,  $\text{CHCl}_3$ ). HPLC analysis of the product:

Daicel CHIRALPAK AD-H column; 15% *i*-PrOH in hexanes; 1.0 mL/min; retention times: 6.9 min (minor), 11.0 min (major).

$^1\text{H NMR}$  (400 MHz,  $\text{CD}_2\text{Cl}_2$ )  $\delta$  7.61 (d,  $J = 7.6$  Hz, 2H), 7.45-7.32 (m, 7H), 7.29 (d,  $J = 8.0$  Hz, 3H), 6.83 (d,  $J = 8.8$  Hz, 2H), 2.44 (s, 3H) ppm.

$^{13}\text{C NMR}$  (100 MHz,  $\text{CD}_2\text{Cl}_2$ )  $\delta$  211.7, 194.6, 156.5, 135.4, 134.7, 130.6, 129.2, 129.1, 129.0, 128.6, 128.4, 127.0, 126.8, 116.0, 112.9, 99.8, 30.4 ppm.

**IR** (thin film) 3443, 3064, 2925, 1683, 1504, 1267, 1117, 834, 760  $\text{cm}^{-1}$ .

**HRMS** (CI+) Calcd for  $\text{C}_{23}\text{H}_{18}\text{O}_2\text{S}$  [ $\text{M}^+$ ]: 358.1028, Found: 358.1036.

**(R)-S-(3-(4-Hydroxyphenyl)-1-(4-methoxyphenyl)-3-phenylpropa-1,2-dien-1-yl)eth**

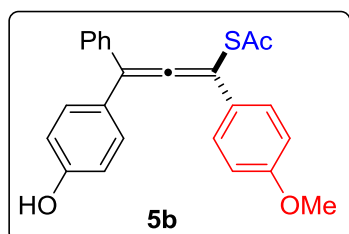

**anethioate ethanethioate (5b)** was prepared as brown oil from substrate **1j** (0.3 mmol, 99.2 mg) according to the General Procedure D (purified by flash column chromatography: 20% EtOAc and 1% AcOH in hexanes,

87.3 mg, 75% yield, 91% ee).

$[\alpha]_{\text{D}}^{25}$ :  $-17.1$  ( $c = 1.0$ ,  $\text{CHCl}_3$ ). HPLC analysis of the product: Daicel CHIRALPAK AD-H column; 20% *i*-PrOH in hexanes; 1.0 mL/min; retention times: 8.5 min (minor), 14.3 min (major).

$^1\text{H NMR}$  (400 MHz,  $\text{CD}_2\text{Cl}_2$ )  $\delta$  7.55 (d,  $J = 8.8$  Hz, 2H), 7.46-7.33 (m, 5H), 7.28 (d,  $J = 8.4$  Hz, 2H), 6.90 (d,  $J = 8.8$  Hz, 2H), 6.82 (d,  $J = 8.4$  Hz, 2H), 3.80 (s, 3H), 2.44 (s, 3H) ppm.

$^{13}\text{C NMR}$  (100 MHz,  $\text{CD}_2\text{Cl}_2$ )  $\delta$  211.0, 195.2, 160.0, 156.6, 135.7, 130.6, 129.2, 129.0, 128.5, 128.0, 127.0, 126.8, 116.0, 114.5, 112.8, 99.4, 55.7, 30.4 ppm.

IR (thin film) 3405, 3065, 1702, 1606, 1509, 1250, 1112, 833, 769  $\text{cm}^{-1}$ .

HRMS (CI+) Calcd for  $\text{C}_{24}\text{H}_{20}\text{O}_3\text{S}$  [ $\text{M}^+$ ]: 388.1133, Found: 388.1145.

**(R)-S-(1-(4-Fluorophenyl)-3-(4-hydroxyphenyl)-3-phenylpropa-1,2-dien-1-yl) ethan**

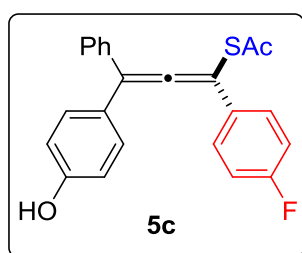

**ethioate (5c)** was prepared as brown oil from substrate **1n** (0.3 mmol, 95.4 mg) according to the General Procedure D (purified by flash column chromatography: 10% EtOAc and 1% AcOH in hexanes, 93.6 mg, 83% yield, 92% ee).

$[\alpha]_{\text{D}}^{25}$ :  $+8.1$  ( $c = 1.0$ ,  $\text{CHCl}_3$ ). HPLC analysis of the product: Daicel CHIRALPAK AD-H column; 15% *i*-PrOH in hexanes; 1.0 mL/min; retention times: 7.3 min (minor), 10.9 min (major).

$^1\text{H NMR}$  (400 MHz,  $\text{CD}_2\text{Cl}_2$ )  $\delta$  7.61-7.56 (m, 2H), 7.44-7.34 (m, 5H), 7.28 (d,  $J = 8.4$  Hz, 2H), 7.06 (d,  $J = 8.8$  Hz, 2H), 6.83 (d,  $J = 8.8$  Hz, 2H), 5.56 (br s, 1H), 2.44 (s, 3H) ppm.

$^{13}\text{C NMR}$  (100 MHz,  $\text{CD}_2\text{Cl}_2$ )  $\delta$  211.5, 194.5, 162.9 (d,  $J_{\text{C-F}} = 246$  Hz), 156.5, 135.3, 130.9, 130.6, 129.2, 129.0, 128.6 (d,  $J_{\text{C-F}} = 6.7$  Hz), 128.5, 126.9, 115.9 (d,  $J_{\text{C-F}} = 21.9$  Hz), 115.8, 113.0, 98.9, 30.5 ppm.

$^{19}\text{F NMR}$  (376 MHz,  $\text{CD}_2\text{Cl}_2$ )  $\delta$  -114.8 ppm.

IR (thin film) 3402, 3028, 2927, 1691, 1505, 1226, 1118, 835  $\text{cm}^{-1}$ .

HRMS (CI+) Calcd for  $\text{C}_{23}\text{H}_{17}\text{FO}_2\text{S}$  [ $\text{M}^+$ ]: 376.0933, Found: 376.0934

**(R)-S-(1-(4-Chlorophenyl)-3-(4-hydroxyphenyl)-3-phenylpropa-1,2-dien-1-yl) ethan**

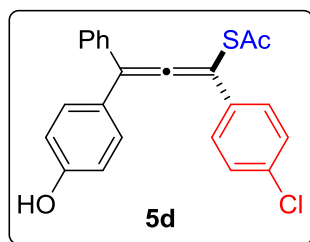

**ethioate (5d)** was prepared as brown oil from substrate **1k** (0.3 mmol, 100.2 mg) according to the General Procedure D (purified by flash column chromatography: 10% EtOAc and 1% AcOH in hexanes, 106.1 mg, 90% yield, 92% ee).

$[\alpha]_{\text{D}}^{25}$ : +5.3 ( $c = 1.0$ ,  $\text{CHCl}_3$ ). HPLC analysis of the product: Daicel CHIRALPAK AD-H column; 15% *i*-PrOH in hexanes; 1.0 mL/min; retention times: 8.9 min (minor), 16.5 min (major).

$^1\text{H NMR}$  (400 MHz,  $\text{CD}_2\text{Cl}_2$ )  $\delta$  7.55 (d,  $J = 8.0$  Hz, 2H), 7.43-7.31 (m, 7H), 7.28 (d,  $J = 8.0$  Hz, 2H), 6.83 (d,  $J = 8.0$  Hz, 2H), 5.63 (br s, 1H), 2.44 (s, 3H) ppm.

$^{13}\text{C NMR}$  (100 MHz,  $\text{CD}_2\text{Cl}_2$ )  $\delta$  211.8, 194.5, 156.6, 135.1, 134.0, 133.5, 130.6, 129.2, 129.15, 129.05, 128.7, 128.1, 126.7, 116.0, 113.3, 98.9, 30.5 ppm.

IR (thin film) 3395, 1682, 1609, 1510, 1218, 1172, 1012, 830, 769  $\text{cm}^{-1}$ .

HRMS (CI+) Calcd for  $\text{C}_{23}\text{H}_{17}^{35}\text{ClO}_2\text{S}$  [ $\text{M}^+$ ]: 392.0638, Found: 392.0649

**(R)-S-(1-(3,5-Dimethylphenyl)-3-(4-hydroxyphenyl)-3-phenylpropa-1,2-dien-1-yl)et**

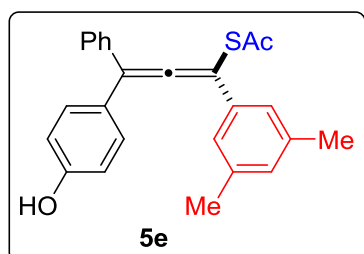

**hanethioate (5e)** was prepared as brown oil from substrate **1o** (0.3 mmol, 98.4 mg) according to the General Procedure D (purified by flash column chromatography: 10% EtOAc and 1% AcOH in hexanes, 107.3 mg, 93% yield, 92% ee).

$[\alpha]_{\text{D}}^{25}$ : +13.8 ( $c = 1.0$ ,  $\text{CHCl}_3$ ). HPLC analysis of the product: Daicel CHIRALPAK AD-H column; 10% *i*-PrOH in hexanes; 1.0 mL/min; retention times: 5.1 min (minor), 5.9 min (major).

$^1\text{H NMR}$  (400 MHz,  $\text{CD}_2\text{Cl}_2$ )  $\delta$  7.45-7.33 (m, 5H), 7.29 (d,  $J = 8.8$  Hz, 2H), 7.23 (s, 2H), 6.93 (s, 1H), 6.83 (d,  $J = 8.8$  Hz, 2H), 5.54 (br s, 1H), 2.43 (s, 3H), 2.30 (s, 6H) ppm.

$^{13}\text{C NMR}$  (100 MHz,  $\text{CD}_2\text{Cl}_2$ )  $\delta$  211.6, 194.9, 156.4, 138.8, 135.5, 134.4, 130.6, 130.2, 129.2, 129.0, 128.5, 127.1, 124.5, 115.9, 112.5, 99.9, 30.4, 21.5 ppm.

IR (thin film) 3387, 3029, 2924, 1684, 1508, 1267, 1116, 839, 758  $\text{cm}^{-1}$ .

HRMS (CI+) Calcd for C<sub>25</sub>H<sub>22</sub>O<sub>2</sub>S [M<sup>+</sup>]: 386.1341, Found: 386.1346.

**(R)-S-(3-(4-Hydroxyphenyl)-3-phenyl-1-(thiophen-3-yl)propa-1,2-dien-1-yl)ethanethioate**

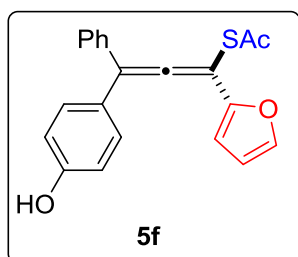

**thioate ethanethioate (5f)** was prepared as brown oil from substrate **11** (0.3 mmol, 87.1 mg) according to the General Procedure D (purified by flash column chromatography: 10% EtOAc and 1% AcOH in hexanes, 78.3 mg, 75% yield, 91% ee).

$[\alpha]_D^{25}$ : +9.2 ( $c = 1.0$ , CHCl<sub>3</sub>). HPLC analysis of the product: Daicel CHIRALPAK AD-H column; 15% *i*-PrOH in hexanes; 1.0 mL/min; retention times: 7.9 min (major), 9.4 min (minor).

The pure **5f** is relatively unstable, but it can be stored as a solution in DCM or CHCl<sub>3</sub> in the refrigerator. However, its TBS-protected derivative **5f'** is stable. Therefore, the characterization of **5f'** is provided. At 0 °C, to a solution of **5f** (0.2 mmol, 69.6 mg) in CH<sub>2</sub>Cl<sub>2</sub> (1 mL) were added 2,6-lutidine (83.2 uL, 0.72 mmol, 3.6 equiv) and a solution of TBSOTf (99.3 uL, 0.44 mmol, 2.2 equiv) in CH<sub>2</sub>Cl<sub>2</sub> (0.2 mL) sequentially. The reaction was stirred at 0 °C for 2.5 h and then warmed to room temperature. The reaction mixture was directly subjected silica gel column chromatography (eluent: 3% Et<sub>2</sub>O in hexanes, pale yellow oil, 0.62 g, quant. yield).

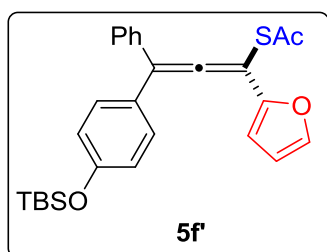

<sup>1</sup>H NMR (400 MHz, CDCl<sub>3</sub>)  $\delta$  7.46 (d,  $J = 8.4$  Hz, 2H), 7.41-7.30 (m, 6H), 6.85 (d,  $J = 8.4$  Hz, 2H), 6.46-6.40 (m, 2H), 2.42 (s, 3H), 1.00 (s, 9H), 0.22 (s, 6H) ppm.

<sup>13</sup>C NMR (100 MHz, CDCl<sub>3</sub>)  $\delta$  210.4, 193.4, 155.9, 148.3, 143.1, 135.1, 130.3, 129.1, 128.5, 128.2, 127.3, 120.2, 114.1,

111.7, 109.1, 90.9, 30.0, 25.7, 18.2, 4.4 ppm.

IR (thin film) 3292, 2930, 1705, 1603, 1507, 1262, 1119, 910, 838 cm<sup>-1</sup>.

HRMS (CI+) Calcd for C<sub>27</sub>H<sub>30</sub>O<sub>3</sub>SSi [M<sup>+</sup>]: 462.1685, Found: 462.1692.

**(R)-S-(3-(4-Hydroxyphenyl)-3-phenyl-1-(thiophen-3-yl)propa-1,2-dien-1-yl) ethane-**

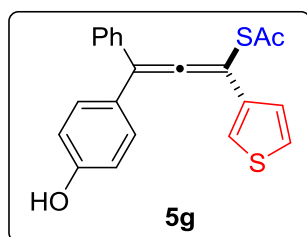

**thioate ethanethioate (5g)** was prepared as brown oil from substrate **1m** (0.3 mmol, 91.8 mg) according to the General Procedure D (purified by flash column chromatography: 10% EtOAc and 1% AcOH in hexanes, 65.7 mg, 88% yield,

90% ee).

$[\alpha]_D^{25}$ : +8.0 ( $c = 1.0$ ,  $\text{CHCl}_3$ ). HPLC analysis of the product: Daicel CHIRALPAK AD-H column; 15% *i*-PrOH in hexanes; 1.0 mL/min; retention times: 8.3 min (minor), 16.0 min (major).

$^1\text{H NMR}$  (400 MHz,  $\text{CD}_2\text{Cl}_2$ )  $\delta$  7.44-7.31 (m, 7H), 7.28 (d,  $J = 8.8$  Hz, 2H), 7.22 (d,  $J = 5.2$  Hz, 1H), 6.83 (d,  $J = 8.8$  Hz, 2H), 5.60 (br s, 1H), 2.43 (s, 3H) ppm.

$^{13}\text{C NMR}$  (100 MHz,  $\text{CD}_2\text{Cl}_2$ )  $\delta$  211.3, 195.1, 156.6, 137.0, 135.5, 130.7, 129.3, 129.0, 128.6, 127.1, 126.9, 126.5, 122.8, 116.0, 112.8, 95.2, 30.4 ppm.

IR (thin film) 3405, 3027, 1683, 1509, 1222, 1118, 841  $\text{cm}^{-1}$ .

HRMS (CI+) Calcd for  $\text{C}_{21}\text{H}_{16}\text{O}_2\text{S}_2$  [ $\text{M}^+$ ]: 364.0592, Found: 364.0581

**S-((R)-3-(4-Hydroxyphenyl)-1-((8S,9S,13S,14S)-13-methyl-17-oxo-7,8,9,11,12,13,14,15**

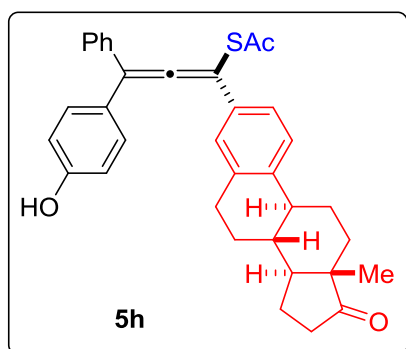

**,16,17-decahydro-6H-cyclopenta[a]phenanthren-3-yl)-3-phenylpropa-1,2-dien-1-yl) ethanethioate (5h)** was prepared as red oil from substrate **1p** (0.2 mmol, 95.3 mg) according to the General Procedure D (purified by flash column chromatography: 20% EtOAc and 1% AcOH in hexanes, 81.3 mg, 76% yield, 89% de).

$[\alpha]_D^{25}$ : +86.6 ( $c = 1.0$ ,  $\text{CHCl}_3$ ). HPLC analysis of the product: Daicel CHIRALPAK AD-H column; 20% *i*-PrOH in hexanes; 1.0 mL/min; retention times: 8.7 min (minor), 9.9 min (major).

$^1\text{H NMR}$  (400 MHz,  $\text{CD}_2\text{Cl}_2$ )  $\delta$  7.45-7.35 (m, 7H), 7.34-7.26 (m, 3H), 6.85 (d,  $J = 8.8$  Hz, 2H), 5.61 (br s, 1H), 2.93-2.83 (m, 2H), 2.55-2.45 (m, 1H), 2.43 (s, 3H), 2.31-2.21 (m, 1H),

217-1.99 (m, 4H), 1.95-1.91 (m, 1H), 1.64-1.51 (m, 2H), 1.51-1.38 (m, 4H), 0.91 (m, 3H) ppm.

$^{13}\text{C}$  NMR (100 MHz,  $\text{CD}_2\text{Cl}_2$ )  $\delta$  222.1, 211.5, 194.8, 156.8, 140.5, 137.6, 135.6, 131.9, 130.6, 129.2, 129.0, 128.5, 127.0, 126.8, 126.1, 124.1, 116.0, 112.7, 99.6, 50.8, 48.4, 44.8, 38.4, 36.3, 32.0, 30.4, 29.9, 26.8, 26.1, 21.9, 14.1 ppm.

IR (thin film) 3401, 2925, 1721, 1511, 1269, 1117, 838  $\text{cm}^{-1}$ .

HRMS (CI+) Calcd for  $\text{C}_{35}\text{H}_{35}\text{O}_3\text{S}$  [ $\text{M}+\text{H}^+$ ]: 535.2307, Found: 535.2337.

**(R)-S-(1-(Cyclohex-1-en-1-yl)-3-(4-hydroxyphenyl)-3-phenylpropa-1,2-dien-1-yl) ethanethioate (5i)** was prepared as brown oil from substrate

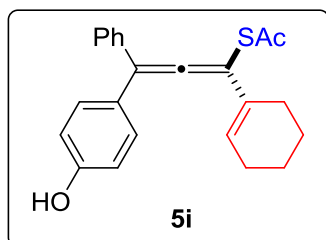

**hanethioate (5i)** was prepared as brown oil from substrate **1q** (0.3 mmol, 91.2 mg) according to the General Procedure D (purified by flash column chromatography: 10% EtOAc and 1% AcOH in hexanes, 76.1 mg, 70% yield, 91% ee).

$[\alpha]_{\text{D}}^{25}$ : +27.1 ( $c = 1.0$ ,  $\text{CHCl}_3$ ). HPLC analysis of the product:

Daicel CHIRALPAK AD-H column; 10% *i*-PrOH in hexanes; 1.0 mL/min; retention times: 6.5 min (minor), 10.7 min (major).

$^1\text{H}$  NMR (400 MHz,  $\text{CD}_2\text{Cl}_2$ )  $\delta$  7.38-7.28 (m, 5H), 7.23 (d,  $J = 8.8$  Hz, 2H), 6.82 (d,  $J = 8.8$  Hz, 2H), 6.18-6.14 (m, 1H), 2.37 (s, 3H), 2.24-2.21 (m, 2H), 2.21-2.16 (m, 2H), 1.71-1.61 (m, 2H), 1.61-1.56 (m, 2H) ppm.

$^{13}\text{C}$  NMR (100 MHz,  $\text{CD}_2\text{Cl}_2$ )  $\delta$  210.3, 195.0, 156.2, 136.1, 131.5, 130.5, 129.1, 128.9, 128.2, 127.7, 127.6, 115.8, 111.9, 101.6, 30.3, 27.7, 26.3, 23.1, 22.5 ppm.

IR (thin film) 3446, 3027, 2930, 1681, 1507, 1268, 1119, 832, 757  $\text{cm}^{-1}$ .

HRMS (CI+) Calcd for  $\text{C}_{23}\text{H}_{22}\text{O}_2\text{S}$  [ $\text{M}^+$ ]: 362.1341, Found: 362.1353.

**(R)-S-(1-(4-Hydroxyphenyl)-4-methyl-1-phenylpenta-1,2,4-trien-3-yl) ethanethioate (5j)** was prepared as brown oil from substrate **1r** (0.3 mmol, 79.2 mg) according to the General Procedure D (purified by flash column chromatography: 10% EtOAc and 1% AcOH in hexanes, 69.6 mg, 72% yield, 88% ee).

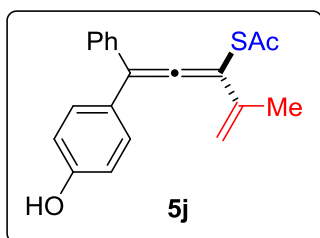

$[\alpha]_{\text{D}}^{25}$ :  $-33.4$  ( $c = 1.0$ ,  $\text{CHCl}_3$ ). HPLC analysis of the product: Daicel CHIRALPAK AD-H column; 10% *i*-PrOH in hexanes; 1.0 mL/min; retention times: 6.7 min (minor), 7.8 min (major).

$^1\text{H NMR}$  (400 MHz,  $\text{CD}_2\text{Cl}_2$ )  $\delta$  7.39-7.33 (m, 4H), 7.33-7.31 (m, 1H), 7.25 (d,  $J = 8.8$  Hz, 2H), 6.84 (d,  $J = 8.8$  Hz, 2H), 5.74 (br s, 1H), 5.40 (s, 1H), 5.13 (s, 1H), 2.39 (s, 3H), 2.02 (s, 3H) ppm.

$^{13}\text{C NMR}$  (100 MHz,  $\text{CD}_2\text{Cl}_2$ )  $\delta$  211.7, 194.9, 156.4, 138.8, 135.6, 130.6, 129.2, 128.9, 128.4, 127.2, 115.9, 115.1, 111.7, 101.3, 30.3, 21.5 ppm.

IR (thin film) 3403, 1681, 1510, 1269, 1122, 837  $\text{cm}^{-1}$ .

HRMS (CI+) Calcd for  $\text{C}_{20}\text{H}_{18}\text{O}_2\text{S}$  [ $\text{M}^+$ ]: 322.1028, Found: 322.1016.

**(R)-S-(3-(4-Hydroxyphenyl)-3-phenyl-1-(trimethylsilyl)propa-1,2-dien-1-yl) ethan-**

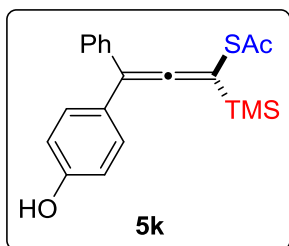

**ethioate (5k)** was prepared as brown oil from substrate **1s** (0.3 mmol, 89.1 mg) according to the General Procedure D (purified by flash column chromatography: 10% EtOAc and 1% AcOH in hexanes, 74.4 mg, 70% yield, 92% ee).

$[\alpha]_{\text{D}}^{25}$ :  $-31.9$  ( $c = 1.0$ ,  $\text{CHCl}_3$ ). HPLC analysis of the product:

Daicel CHIRALCEL column; AD-H column; 5% *i*-PrOH in hexanes; 1.0 mL/min; retention times: 6.6 min (minor), 7.9 min (major).

$^1\text{H NMR}$  (400 MHz,  $\text{CD}_2\text{Cl}_2$ )  $\delta$  7.37 (d,  $J = 8.0$  Hz, 4H), 7.33-7.27 (m, 1H), 7.24 (d,  $J = 8.8$  Hz, 3H), 6.84 (d,  $J = 8.8$  Hz, 2H), 2.37 (s, 3H), 0.24 (s, 9H) ppm.

$^{13}\text{C NMR}$  (100 MHz,  $\text{CD}_2\text{Cl}_2$ )  $\delta$  212.9, 195.6, 160.0, 136.1, 130.3, 128.9, 127.8 (2C), 127.5, 115.9, 107.2, 90.8, 30.3,  $-1.1$  ppm.

IR (thin film) 3538, 1657, 1506, 1251, 1130, 834, 700  $\text{cm}^{-1}$ .

HRMS (CI+) Calcd for  $\text{C}_{20}\text{H}_{22}\text{O}_2\text{SSi}$  [ $\text{M}^+$ ]: 354.1110, Found: 354.1107.



**(R)-S-(3-(4-Hydroxyphenyl)-3-phenyl-1-(triethylsilyl)propa-1,2-dien-1-yl) ethane-**

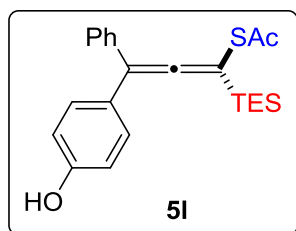

**thioate (5l)** was prepared as brown oil from substrate **1t** (0.3 mmol, 101.4 mg) according to the General Procedure D (purified by flash column chromatography: 10% EtOAc and 1% AcOH in hexanes, 107.4 mg, 90% yield, 90% ee).

$[\alpha]_{\text{D}}^{25}$ : -28.5 ( $c = 1.0$ ,  $\text{CHCl}_3$ ). HPLC analysis of the product: AD-H column; 3% *i*-PrOH in hexanes; 1.0 mL/min; retention times: 8.5 min (minor), 9.9 min (major).

$^1\text{H NMR}$  (400 MHz, acetone- $d_6$ )  $\delta$  8.55 (br s, 1H), 7.43-7.35 (m, 4H), 7.32-7.27 (m, 1H), 7.24 (d,  $J = 8.0$  Hz, 2H), 6.88 (d,  $J = 8.4$  Hz, 2H), 2.34 (s, 3H), 0.93 (t,  $J = 8.0$  Hz, 9H), 0.73 (q,  $J = 8.0$  Hz, 6H) ppm.

$^{13}\text{C NMR}$  (100 MHz, acetone- $d_6$ )  $\delta$  214.4, 193.5, 157.8, 136.5, 130.4, 129.1, 128.0 (2C), 126.6, 116.1, 107.0, 87.9, 30.0, 7.4, 3.9 ppm.

IR (thin film) 3447, 2955, 1662, 1507, 1227, 1119, 700  $\text{cm}^{-1}$ .

HRMS (CI+) Calcd for  $\text{C}_{23}\text{H}_{28}\text{O}_2\text{SSi}$  [ $\text{M}^+$ ]: 396.1579, Found: 396.1574.

**(R)-S-(1-(4-Hydroxyphenyl)-1-phenylhepta-1,2-dien-3-yl) ethanethioate (5m)** was

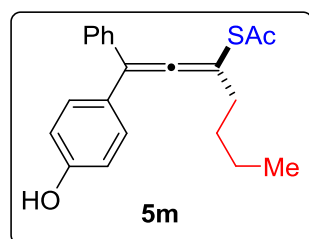

prepared as brown oil from substrate **1u** (0.3 mmol, 84.0 mg) according to the General Procedure D (purified by flash column chromatography: 10% EtOAc and 1% AcOH in hexanes, 96.2 mg, 95% yield, 92% ee).

$[\alpha]_{\text{D}}^{25}$ : -13.2 ( $c = 1.0$ ,  $\text{CHCl}_3$ ). HPLC analysis of the product: Daicel CHIRALPAK AD-H column; 5% *i*-PrOH in hexanes; 1.0 mL/min; retention times: 8.2 min (minor), 9.4 min (major).

$^1\text{H NMR}$  (400 MHz, acetone- $d_6$ )  $\delta$  8.56 (br s, 1H), 7.42-7.35 (m, 4H), 7.35-7.29 (m, 1H), 7.21 (d,  $J = 8.8$  Hz, 2H), 6.88 (d,  $J = 8.8$  Hz, 2H), 2.44 (t,  $J = 7.2$  Hz, 2H), 2.35 (s, 3H), 1.61-1.52 (m, 2H), 1.39-1.28 (m, 2H), 0.85 (t,  $J = 7.2$  Hz, 3H) ppm.

$^{13}\text{C NMR}$  (100 MHz, acetone- $d_6$ )  $\delta$  208.1, 194.0, 158.0, 136.7, 130.5, 129.3, 129.1, 128.4, 126.9, 116.1, 111.2, 98.9, 35.6, 30.5, 30.0, 22.5, 13.9 ppm.

IR (thin film) 3445, 3029, 2927, 1674, 1507, 1220, 1115, 832, 698  $\text{cm}^{-1}$ .

HRMS (CI+) Calcd for  $\text{C}_{21}\text{H}_{22}\text{O}_2\text{S}$  [ $\text{M}^+$ ]: 338.1341, Found: 338.1338.

**(R)-S-(1-(4-Hydroxyphenyl)-1,5-diphenylpenta-1,2-dien-3-yl) ethanethioate (5n)**

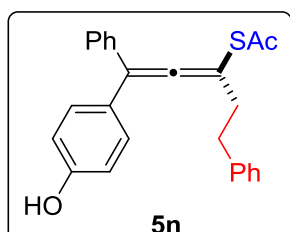

was prepared as brown oil from substrate **1v** (0.3 mmol, 98.4 mg) according to the General Procedure D (purified by flash column chromatography: 10% EtOAc and 1% AcOH in hexanes, 113.6 mg, 98% yield, 94% ee).

$[\alpha]_{\text{D}}^{25}$ : -20.1 ( $c = 1.0$ ,  $\text{CHCl}_3$ ). HPLC analysis of the product:

Daicel CHIRALPAK AD-H column; 5% *i*-PrOH in hexanes; 1.0 mL/min; retention times: 17.9 min (minor), 19.1 min (major).

$^1\text{H}$  NMR (400 MHz,  $\text{CD}_2\text{Cl}_2$ )  $\delta$  7.36-7.29 (m, 3H), 7.27-7.16 (m, 7H), 7.12 (d,  $J = 8.8$  Hz, 2H), 6.80 (d,  $J = 8.8$  Hz, 2H), 5.49 (br s, 1H), 2.91 (t,  $J = 7.6$  Hz, 2H), 2.77 (t,  $J = 8.0$  Hz, 2H), 2.38 (s, 3H) ppm.

$^{13}\text{C}$  NMR (100 MHz,  $\text{CD}_2\text{Cl}_2$ )  $\delta$  208.3, 195.5, 156.1, 141.4, 136.1, 130.6, 129.2, 128.9, 128.8, 128.7, 128.1, 127.7, 126.4, 115.7, 111.2, 98.1, 37.3, 34.3, 30.6 ppm.

IR (thin film) 3405, 1674, 1510, 1267, 1115, 837  $\text{cm}^{-1}$ .

HRMS (CI+) Calcd for  $\text{C}_{25}\text{H}_{22}\text{O}_2\text{S}$  [ $\text{M}^+$ ]: 386.1341, Found: 386.1331.

**(R)-S-(1-(4-Hydroxyphenyl)-1-phenylhexa-1,2,5-trien-3-yl) ethanethioate (5o)** was

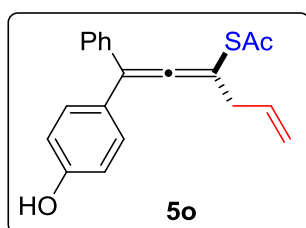

prepared as brown oil from propargylic substrate **1w** (0.3 mmol, 79.2 mg) according to the General Procedure D (purified by flash column chromatography: 10% EtOAc and 1% AcOH in hexanes, 90.2 mg, 92% yield, 93% ee).

$[\alpha]_{\text{D}}^{25}$ : -17.7 ( $c = 1.0$ ,  $\text{CHCl}_3$ ). HPLC analysis of the product: Daicel CHIRALPAK AD-H column; 5% *i*-PrOH in hexanes; 1.0 mL/min; retention times: 10.7 min (minor), 12.6 min (major).

$^1\text{H NMR}$  (400 MHz,  $\text{CD}_2\text{Cl}_2$ )  $\delta$  7.37-7.28 (m, 5H), 7.23 (d,  $J = 8.8$  Hz, 2H), 6.83 (d,  $J = 8.8$  Hz, 2H), 5.97-5.87 (m, 1H), 5.62 (br s, 1H), 5.20-5.09 (m, 2H), 3.19 (d,  $J = 6.8$  Hz, 2H), 2.36 (s, 3H) ppm.

$^{13}\text{C NMR}$  (100 MHz,  $\text{CD}_2\text{Cl}_2$ )  $\delta$  208.6, 195.0, 156.2, 136.1, 134.8, 130.6, 129.2, 128.8, 128.3, 127.8, 117.5, 115.8, 111.3, 97.1, 40.1, 30.5 ppm.

IR (thin film) 3315, 3078, 1675, 1510, 1269, 1116, 837  $\text{cm}^{-1}$ .

HRMS (CI+) Calcd for  $\text{C}_{20}\text{H}_{18}\text{O}_2\text{S}$  [ $\text{M}^+$ ]: 322.1028, Found: 322.1017.

**(R)-S-(1-(4-Hydroxyphenyl)-1-phenylundeca-1,2-dien-10-yn-3-yl) ethanethioate (5p)**

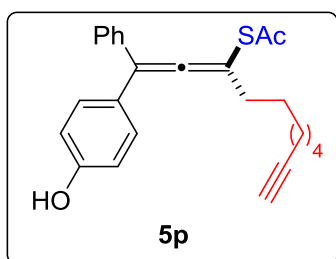

was prepared as brown oil from substrate **1x** (0.3 mmol, 99.8 mg) according to the General Procedure D (purified by flash column chromatography: 10% EtOAc and 1% AcOH in hexanes, 75.5 mg, 64% yield, 91% ee).

$[\alpha]_{\text{D}}^{25}$ :  $-17.7$  ( $c = 1.0$ ,  $\text{CHCl}_3$ ). HPLC analysis of the product:

Daicel CHIRALPAK AD-H column; 5% *i*-PrOH in hexanes; 1.0 mL/min; retention times: 11.9 min (minor), 14.9 min (major).

$^1\text{H NMR}$  (400 MHz,  $\text{CD}_2\text{Cl}_2$ )  $\delta$  7.42-7.34 (m, 4H), 7.34-7.27 (m, 1H), 7.24 (d,  $J = 8.8$  Hz, 2H), 6.85 (d,  $J = 8.8$  Hz, 2H), 2.45 (t,  $J = 7.2$  Hz, 2H), 2.37 (s, 3H), 2.13-2.08 (3, 2H), 1.97-1.95 (m, 1H), 1.64-1.54 (m, 2H), 1.47-1.27 (m, 6H) ppm.

$^{13}\text{C NMR}$  (100 MHz,  $\text{CD}_2\text{Cl}_2$ )  $\delta$  208.0, 195.7, 156.2, 136.3, 130.5, 129.1, 128.8, 128.2, 127.8, 115.8, 111.0, 98.6, 85.1, 68.4, 35.7, 30.5, 28.86, 28.85, 28.8, 28.1, 18.6 ppm.

IR (thin film) 3629, 3295, 2932, 1683, 1508, 1267, 1118, 833, 769  $\text{cm}^{-1}$ .

HRMS (CI+) Calcd for  $\text{C}_{25}\text{H}_{26}\text{O}_2\text{S}$  [ $\text{M}^+$ ]: 390.1654, Found: 390.1671.

**(R)-S-(5-((Tert-butyldimethylsilyl)oxy)-1-(4-hydroxyphenyl)-1-phenylpenta-1,2-dien-3-yl) ethanethioate (5q)** was prepared as brown oil from substrate **1y** (0.3 mmol, 114.6 mg) according to the General Procedure D (purified by flash column chromatography: 10% EtOAc and 1% AcOH in hexanes, 108.6 mg, 82% yield, 93% ee).

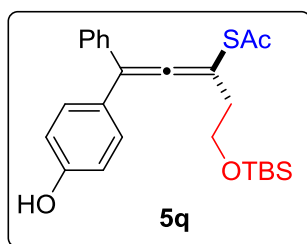

$[\alpha]_{\text{D}}^{25}$ :  $-16.2$  ( $c = 1.0$ ,  $\text{CHCl}_3$ ). HPLC analysis of the product: Daicel CHIRALCEL OD-H column; 5% *i*-PrOH in hexanes; 0.5 mL/min; retention times: 13.1 min (minor), 14.2 min (major).

$^1\text{H NMR}$  (400 MHz,  $\text{CD}_2\text{Cl}_2$ )  $\delta$  7.35 (d,  $J = 8.0$  Hz, 4H), 7.34-7.27 (m, 1H), 7.24 (d,  $J = 8.8$  Hz, 2H), 6.82 (d,  $J = 8.8$  Hz, 2H), 3.84 (t,  $J = 6.4$  Hz, 2H), 2.66 (t,  $J = 6.4$  Hz, 2H), 2.36 (s, 3H), 0.86 (s, 9H), 0.03 (s, 6H) ppm.

$^{13}\text{C NMR}$  (100 MHz,  $\text{CD}_2\text{Cl}_2$ )  $\delta$  208.8, 195.2, 156.2, 136.1, 130.7, 129.3, 128.8, 128.2, 127.8, 115.8, 110.7, 95.8, 61.5, 39.0, 30.5, 26.1, 18.6,  $-5.2$  ppm.

IR (thin film) 3340, 2939, 1698, 1508, 1259, 1103, 835  $\text{cm}^{-1}$ .

HRMS (CI<sup>+</sup>) Calcd for  $\text{C}_{25}\text{H}_{32}\text{O}_3\text{SSi}$  [ $\text{M}^+$ ]: 440.1841, Found: 440.1831.

#### (*R*)-*S*-(6-Chloro-1-(4-hydroxyphenyl)-1-phenylhexa-1,2-dien-3-yl) ethanethioate (**5r**)

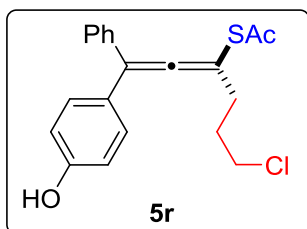

was prepared as brown oil from substrate **1z** (0.3 mmol, 90.3 mg) according to the General Procedure D (purified by flash column chromatography: 10% EtOAc and 1% AcOH in hexanes, 103.2 mg, 96% yield, 93% ee).

$[\alpha]_{\text{D}}^{25}$ :  $-24.9$  ( $c = 1.0$ ,  $\text{CHCl}_3$ ). HPLC analysis of the product: Daicel CHIRALPAK AD-H column; 10% *i*-PrOH in hexanes; 1.0 mL/min; retention times: 7.3 min (minor), 8.0 min (major).

$^1\text{H NMR}$  (400 MHz,  $\text{CD}_2\text{Cl}_2$ )  $\delta$  7.41-7.30 (m, 5H), 7.23 (d,  $J = 8.8$  Hz, 2H), 6.84 (d,  $J = 8.8$  Hz, 2H), 5.78 (br s, 1H), 3.55 (t,  $J = 6.8$  Hz, 2H), 2.60 (t,  $J = 6.8$  Hz, 2H), 2.38 (s, 3H), 2.10-2.02 (m, 2H) ppm.

$^{13}\text{C NMR}$  (100 MHz,  $\text{CD}_2\text{Cl}_2$ )  $\delta$  208.1, 195.5, 156.3, 136.0, 130.5, 129.1, 128.9, 128.3, 127.6, 115.8, 111.5, 97.3, 44.6, 33.1, 31.2, 30.6 ppm.

IR (thin film) 3421, 3029, 2926, 1675, 1511, 1269, 1118, 837  $\text{cm}^{-1}$ .

HRMS (CI<sup>+</sup>) Calcd for  $\text{C}_{20}\text{H}_{19}^{35}\text{ClO}_2\text{S}$  [ $\text{M}^+$ ]: 358.0794, Found: 358.0779.

**(R)-S-(6-Cyano-1-(4-hydroxyphenyl)-1-phenylhexa-1,2-dien-3-yl) ethanethioate (5s)**

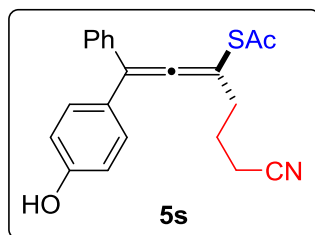

was prepared as brown oil from substrate **1aa** (0.3 mmol, 87.5 mg) according to the General Procedure D (purified by flash column chromatography: 10% EtOAc and 1% AcOH in hexanes, 81.6 mg, 78% yield, 92% ee).

$[\alpha]_{\text{D}}^{25}$ :  $-10.7$  ( $c = 1.0$ ,  $\text{CHCl}_3$ ). HPLC analysis of the product: Daicel CHIRALPAK AD-H column; 10% *i*-PrOH in hexanes; 1.0 mL/min; retention times: 13.3 min (minor), 15.3 min (major).

$^1\text{H NMR}$  (400 MHz,  $\text{CD}_2\text{Cl}_2$ )  $\delta$  7.41-7.30 (m, 5H), 7.21 (d,  $J = 8.8$  Hz, 2H), 6.84 (d,  $J = 8.8$  Hz, 2H), 5.87 (br s, 1H), 2.57 (t,  $J = 7.2$  Hz, 2H), 2.76 (s, 3H), 2.35 (t,  $J = 7.2$  Hz, 2H), 1.97-1.89 (m, 2H) ppm.

$^{13}\text{C NMR}$  (100 MHz,  $\text{CD}_2\text{Cl}_2$ )  $\delta$  208.2, 195.0, 156.5, 135.8, 130.5, 129.1, 128.9, 128.4, 127.3, 119.8, 115.9, 111.8, 96.8, 34.7, 30.5, 24.2, 16.7 ppm.

IR (thin film) 3227, 1610, 1511, 1269, 1114, 771  $\text{cm}^{-1}$ .

HRMS (CI<sup>+</sup>) Calcd for  $\text{C}_{21}\text{H}_{19}\text{NO}_2\text{S}$  [ $\text{M}^+$ ]: 349.1136, Found: 349.1135.

**(R)-S-(1-Cyclopropyl-3-(4-hydroxyphenyl)-3-phenylpropa-1,2-dien-1-yl) et**

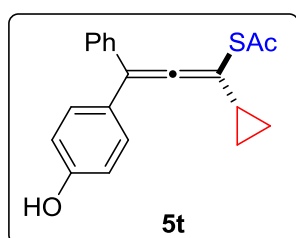

**hanethioate (5t)** was prepared as brown oil from substrate **1ab** (0.3 mmol, 79.2 mg) according to the General Procedure D (purified by flash column chromatography: 10% EtOAc and 1% AcOH in hexanes, 81.9 mg, 85% yield, 92% ee).

$[\alpha]_{\text{D}}^{25}$ :  $-44.3$  ( $c = 1.0$ ,  $\text{CHCl}_3$ ). HPLC analysis of the product: Daicel CHIRALPAK AD-H; 3% *i*-PrOH in hexanes; 1.0 mL/min; retention times: 24.8 min (minor), 26.1 min (major).

$^1\text{H NMR}$  (400 MHz, acetone- $d_6$ )  $\delta$  8.59 (br s, 1H), 7.42-7.30 (m, 5H), 7.18 (d,  $J = 8.4$  Hz, 2H), 6.87 (d,  $J = 8.4$  Hz, 2H), 2.37 (s, 3H), 1.73-1.65 (m, 1H), 0.82-0.78 (m, 2H), 0.59-0.49 (m, 2H) ppm.

$^{13}\text{C}$  NMR (100 MHz, acetone- $d_6$ )  $\delta$  207.9, 193.9, 158.2, 136.6, 130.6, 129.3, 129.2, 128.5, 126.8, 116.2, 112.1, 101.7, 30.0, 15.9, 7.48, 7.46 ppm.

IR (thin film) 3418, 3015, 2963, 1691, 1507, 1266, 1119, 832, 700  $\text{cm}^{-1}$ .

HRMS (CI+) Calcd for  $\text{C}_{20}\text{H}_{18}\text{O}_2\text{S}$  [ $\text{M}^+$ ]: 322.1028, Found: 322.1016.

**(R)-S-(1-(4-Hydroxyphenyl)-4-methyl-1-phenylpenta-1,2-dien-3-yl) ethanethioate**

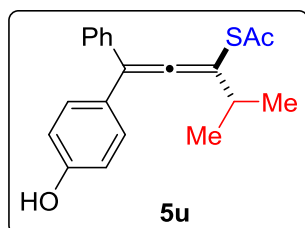

**(5u)** was prepared as brown oil from substrate **1ac** (0.3 mmol, 79.8 mg) according to the General Procedure D (purified by flash column chromatography: 10% EtOAc and 1% AcOH in hexanes, 87.8 mg, 90% yield, 92% ee).

$[\alpha]_{\text{D}}^{25}$ : -12.1 ( $c = 1.0$ ,  $\text{CHCl}_3$ ). HPLC analysis of the product: Daicel CHIRALPAK AD-H column; 2% *i*-PrOH in hexanes; 1.0 mL/min; retention times: 19.9 min (minor), 21.8 min (major).

$^1\text{H}$  NMR (400 MHz, acetone- $d_6$ )  $\delta$  8.56 (br s, 1H), 7.48-7.38 (m, 4H), 7.38-7.28 (m, 1H), 7.22 (d,  $J = 8.8$  Hz, 2H), 6.88 (d,  $J = 8.8$  Hz, 2H), 2.98-2.51 (m, 1H), 2.36 (s, 3H), 1.18-1.15 (m, 6H) ppm.

$^{13}\text{C}$  NMR (100 MHz, acetone- $d_6$ )  $\delta$  207.4, 194.0, 158.0, 136.7, 130.5, 129.2, 129.1, 128.3, 126.9, 116.1, 111.9, 105.0, 35.2, 30.0, 21.7 ppm.

IR (thin film) 3415, 2965, 1671, 1508, 1222, 1115, 832, 700  $\text{cm}^{-1}$ .

HRMS (CI+) Calcd for  $\text{C}_{20}\text{H}_{20}\text{O}_2\text{S}$  [ $\text{M}^+$ ]: 324.1184, Found: 324.1183.

**(R)-S-(1-(4-Hydroxyphenyl)-4,4-dimethyl-1-phenylpenta-1,2-dien-3-yl) ethane-**

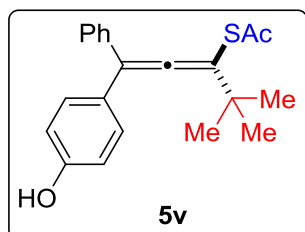

**thioate (5v)** was prepared as brown oil from substrate **1ad** (0.3 mmol, 84.5 mg) according to the General Procedure D (purified by flash column chromatography: 10% EtOAc and 1% AcOH in hexanes, 90.2 mg, 89% yield, 94% ee).

$[\alpha]_{\text{D}}^{25}$ : -35.2 ( $c = 1.0$ ,  $\text{CHCl}_3$ ). HPLC analysis of the product: Daicel CHIRALPAK AD-H column; 5% *i*-PrOH in hexanes; 1.0 mL/min; retention times: 7.9 min (minor), 8.9 min (major).

$^1\text{H NMR}$  (400 MHz, acetone- $d_6$ )  $\delta$  8.55 (br s, 1H), 7.44-7.36 (m, 4H), 7.34-7.28 (m, 1H), 7.25 (d,  $J = 8.8$  Hz, 2H), 6.88 (d,  $J = 8.8$  Hz, 2H), 2.35 (s, 3H), 1.18 (s, 9H) ppm.

$^{13}\text{C NMR}$  (100 MHz, acetone- $d_6$ )  $\delta$  208.1, 193.3, 157.9, 136.8, 130.5, 129.2, 129.1, 128.2, 127.0, 116.1, 110.7, 107.2, 37.9, 29.8, 28.9 ppm.

IR (thin film) 3446, 2966, 1674, 1508, 1222, 1118, 759  $\text{cm}^{-1}$ .

HRMS (CI+) Calcd for  $\text{C}_{21}\text{H}_{22}\text{O}_2\text{S}$  [ $\text{M}^+$ ]: 338.1341, Found: 338.1357.

**(S)-S-(3-(4-Hydroxyphenyl)-1-phenyl-3-(4-(prop-2-yn-1-yloxy)phenyl)propa-1,2-dien-1-yl) ethanethioate (5w)**

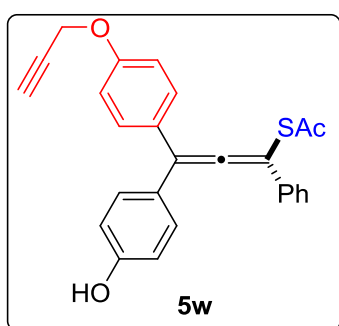

**n-1-yl) ethanethioate (5w)** was prepared as brown oil from substrate **1ae** (0.3 mmol, 106.2 mg) according to the General Procedure D (purified by flash column chromatography: 20% EtOAc and 1% AcOH in hexanes, 62.8 mg, 51% yield, 93% ee).

$[\alpha]_{\text{D}}^{25}$ :  $-24.1$  ( $c = 1.0$ ,  $\text{CHCl}_3$ ). HPLC analysis of the product:

Daicel CHIRALPAK AD-H column; 20% *i*-PrOH in hexanes; 1.0 mL/min; retention times: 9.1 min (minor), 14.9 min (major).

The pure form of **5w** is relatively unstable, but it can be stored as a solution in DCM or  $\text{CHCl}_3$  in the refrigerator. However, its TBS-protected derivative **5w'** is stable. Therefore, the characterization of **5w'** is provided.

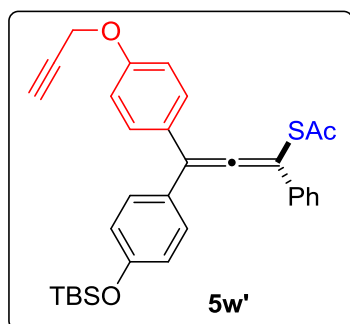

$^1\text{H NMR}$  (400 MHz,  $\text{CDCl}_3$ )  $\delta$  7.61 (d,  $J = 8.0$  Hz, 2H), 7.41-7.23 (m, 7H), 6.99 (d,  $J = 8.8$  Hz, 2H), 6.85 (d,  $J = 8.8$  Hz, 2H), 4.71 (s, 2H), 2.54 (s, 1H), 2.43 (s, 3H), 1.0 (s, 9H), 0.23 (s, 6H) ppm.

$^{13}\text{C NMR}$  (100 MHz,  $\text{CDCl}_3$ )  $\delta$  211.4, 193.9, 157.5, 155.8, 134.5, 130.1, 130.0, 128.6, 128.0, 127.8, 127.3, 126.4, 120.2,

115.0, 112.0, 99.1, 78.4, 75.7, 55.8, 30.1, 25.6, 18.2, 4.4 ppm.

IR (thin film) 3443, 3294, 2930, 1705, 1603, 1507, 1261, 1029, 909, 837  $\text{cm}^{-1}$ .

HRMS (CI+) Calcd for  $\text{C}_{32}\text{H}_{34}\text{O}_3\text{SSi}$  [ $\text{M}^+$ ]: 526.1998, Found: 526.2009.

(S)-S-(3-(3,5-Dimethoxyphenyl)-3-(4-hydroxyphenyl)-1-phenylpropa-1,2-dien-1-yl) ethanethioate (**5x**) was prepared as brown oil from substrate **1af** (0.3 mmol, 108.1

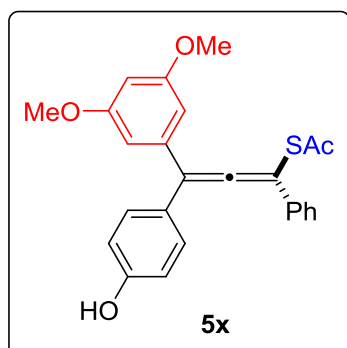

mg) according to the General Procedure D (purified by flash column chromatography: 20% EtOAc and 1% AcOH in hexanes, 80.3 mg, 64% yield, 92% ee).

$[\alpha]_{D}^{25}$ :  $-47.3$  ( $c = 1.0$ ,  $\text{CHCl}_3$ ). HPLC analysis of the product: Daicel CHIRALPAK AD-H column; 15% *i*-PrOH in hexanes; 1.0 mL/min; retention times: 7.5 min (minor),

16.5 min (major).

$^1\text{H NMR}$  (400 MHz,  $\text{CD}_2\text{Cl}_2$ )  $\delta$  7.61 (d,  $J = 7.2$  Hz, 2H), 7.36 (t,  $J = 7.2$  Hz, 2H), 7.31-7.27 (m, 3H), 6.82 (d,  $J = 8.4$  Hz, 2H), 6.61-6.05 (m, 2H), 6.47-6.45 (m, 2H), 3.77 (s, 6H), 2.44 (s, 3H) ppm.

$^{13}\text{C NMR}$  (100 MHz,  $\text{CD}_2\text{Cl}_2$ )  $\delta$  211.6, 194.7, 161.3, 156.5, 137.4, 134.6, 130.7, 129.1, 128.4 (2C), 126.7, 115.9, 112.8, 107.3, 100.6, 99.7, 55.8, 30.5 ppm.

IR (thin film) 3474, 2961, 1680, 1593, 1511, 1204, 1155, 837  $\text{cm}^{-1}$ .

HRMS (CI+) Calcd for  $\text{C}_{25}\text{H}_{22}\text{O}_4\text{S}$  [ $\text{M}^+$ ]: 418.1239, Found: 418.1237.

(R)-S-(1-(4-Hydroxy-3-methylphenyl)-1-phenylhepta-1,2-dien-3-yl) ethanethioate

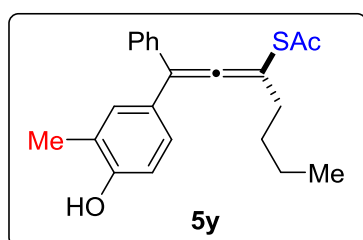

(**5y**) was prepared as brown oil from substrate **1ag** (0.3 mmol, 88.4 mg) according to the General Procedure D (purified by flash column chromatography: 10% EtOAc and 1% AcOH in hexanes, 98.3 mg, 93% yield, 91% ee).

$[\alpha]_{D}^{25}$ :  $-22.0$  ( $c = 1.0$ ,  $\text{CHCl}_3$ ). HPLC analysis of the product: Daicel CHIRALPAK AD-H column; 5% *i*-PrOH in hexanes; 1.0 mL/min; retention times: 7.6 min (minor), 9.0 min (major).

$^1\text{H NMR}$  (400 MHz,  $\text{CD}_2\text{Cl}_2$ )  $\delta$  7.37 (d,  $J = 8.4$  Hz, 4H), 7.34-7.28 (m, 1H), 7.13-7.12 (m, 1H), 7.08-7.05 (m, 1H), 6.77 (d,  $J = 8.4$  Hz, 1H), 2.44 (t,  $J = 7.6$  Hz, 2H), 2.37 (s, 3H), 2.23 (s, 3H), 1.62-1.53 (m, 2H), 1.36 (q,  $J = 7.6$  Hz, 2H), 0.89 (t,  $J = 7.6$  Hz, 3H) ppm.



$^{13}\text{C}$  NMR (100 MHz,  $\text{CD}_2\text{Cl}_2$ )  $\delta$  208.0, 195.3, 154.4, 136.5, 131.7, 129.2, 128.8, 128.1, 128.0, 127.8, 124.5, 115.3, 111.0, 98.7, 35.6, 30.52, 30.50, 22.6, 16.0, 14.0 ppm.

IR (thin film) 3400, 3023, 2928, 1685, 1503, 1278, 1116, 954, 824, 758  $\text{cm}^{-1}$ .

HRMS (CI+) Calcd for  $\text{C}_{22}\text{H}_{24}\text{O}_2\text{S}$  [ $\text{M}^+$ ]: 352.1497, Found: 352.1501.

**(R)-S-(1-(4-Hydroxyphenyl)-1-phenylhepta-1,2-dien-3-yl) benzothioate (5z)** was

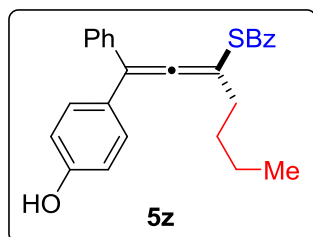

prepared as pale yellow solid from substrate **1u** (0.3 mmol, 84.5 mg) according to the General Procedure D (catalyst (R)-**A7** instead of catalyst (S)-**B1** and thiobenzoic acid instead of thioacetic acid, purified by flash column

chromatography: 8% EtOAc and 2% AcOH in hexanes, 97.2 mg, 81% yield, 90% ee).

$[\alpha]_{\text{D}}^{25}$ : +27.5 ( $c = 1.0$ ,  $\text{CHCl}_3$ ). HPLC analysis of the product: Daicel CHIRALPAK AD-H column; 5% *i*-PrOH in hexanes; 1.0 mL/min; retention times: 11.3 min (major), 15.9 min (minor).

$^1\text{H}$  NMR (400 MHz, acetone- $d_6$ )  $\delta$  8.15 (br s, 1H), 7.98 (d,  $J = 8.4$  Hz, 2H), 7.68 (t,  $J = 7.6$  Hz, 1H), 7.55 (t,  $J = 7.6$  Hz, 2H), 7.42-7.34 (m, 4H), 7.34-7.31 (m, 1H), 7.24 (d,  $J = 8.4$  Hz, 2H), 6.89 (d,  $J = 8.8$  Hz, 2H), 2.55 (t,  $J = 7.6$  Hz, 2H), 1.68-1.59 (m, 2H), 1.44-1.33 (m, 2H), 0.88 (t,  $J = 7.6$  Hz, 3H) ppm.

$^{13}\text{C}$  NMR (100 MHz, acetone- $d_6$ )  $\delta$  208.7, 190.4, 158.2, 137.5, 136.7, 134.5, 130.6, 129.7, 129.4, 129.2, 128.5, 127.9, 126.9, 116.2, 111.5, 98.2, 35.7, 30.7, 22.6, 14.0 ppm.

IR (thin film) 3416, 2929, 1669, 1510, 1206, 904, 767  $\text{cm}^{-1}$ .

HRMS (CI+) Calcd for  $\text{C}_{26}\text{H}_{24}\text{O}_2\text{S}$  [ $\text{M}^+$ ]: 400.1497, Found: 400.1505.

## Supplementary Note 1. Mechanistic Study

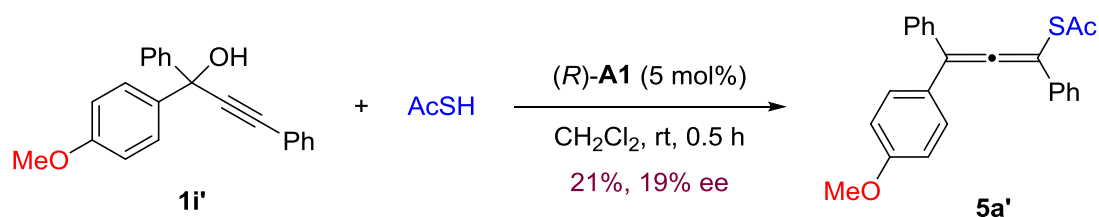

**S-(3-(4-methoxyphenyl)-1,3-diphenylpropa-1,2-dien-1-yl) ethanethioate (5a')** was prepared as red oil from propargylic alcohol **1i'** (94.3 mg, 0.3 mmol) according to the General Procedure D (with CH<sub>2</sub>Cl<sub>2</sub> as solvent, and without 3Å MS, room temperature for 0.5 h (21% <sup>1</sup>H NMR yield) or 72 h (full conversion), purified by flash column chromatography: 10% EtOAc in hexanes, 74.8 mg, 67% yield, 19% ee).

[α]<sub>D</sub><sup>25</sup>: +4.2 (*c* = 1.0, CHCl<sub>3</sub>). HPLC analysis of the product: Daicel CHIRALPAK AD-H column; 5% *i*-PrOH in hexanes; 1.0 mL/min; retention times: 8.5 min (major), 10.0 min (minor).

<sup>1</sup>H NMR (400 MHz, CDCl<sub>3</sub>) δ 7.62 (d, *J* = 8.0 Hz, 2H), 7.46 (d, *J* = 8.4 Hz, 2H), 7.41-7.33 (m, 7H), 7.29-7.24 (m, 1H), 6.93 (d, *J* = 8.8 Hz, 2H), 3.83 (s, 3H), 2.43 (s, 3H) ppm.

<sup>13</sup>C NMR (100 MHz, CDCl<sub>3</sub>) δ 211.4, 193.7, 159.6, 135.0, 134.3, 120.1, 128.9, 128.6, 128.1, 127.9, 126.7, 126.4, 114.1, 112.4, 99.3, 55.3, 30.1 ppm.

IR (thin film) 3057, 2932, 1605, 1509, 1444, 1250, 1178, 1034, 832, 698 cm<sup>-1</sup>.

HRMS (CI<sup>+</sup>) Calcd for C<sub>24</sub>H<sub>20</sub>O<sub>2</sub>S [M<sup>+</sup>]: 372.1184, Found: 372.1182.

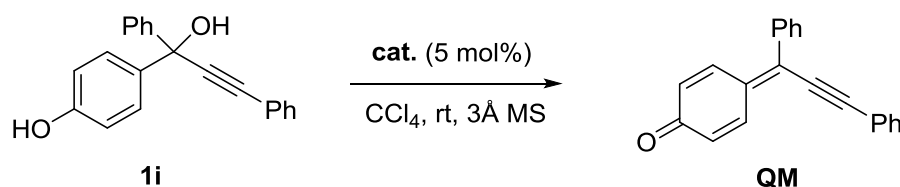

**4-(1,3-Diphenylprop-2-yn-1-ylidene)cyclohexa-2,5-dienone (QM)**. To a solution of substrate **1i** (300.4 mg, 1.0 mmol) in CCl<sub>4</sub> (10 mL) were added 3Å MS (300 mg) and (*rac*)-A7 (17.4 mg, 0.05 mmol) or (*S*)-B1 (42.5 mg, 0.05 mmol). The reaction was stirred at room temperature for 1-2 h to give *para*-quinone methide **QM** as a red solid

(purified by flash column chromatography: 5% EtOAc in hexanes, 211.8 mg, 75% yield for **A7**; 104.5 mg, 37% yield for **B1**).

$^1\text{H NMR}$  (400 MHz, acetone- $d_6$ )  $\delta$  8.18 (dd,  $J = 2.4$  Hz,  $J = 10$  Hz, 1H), 7.68-7.62 (m, 4H), 7.58-7.52 (m, 3H), 7.51-7.44 (m, 4H), 6.48 (dd,  $J = 2.0$  Hz,  $J = 10$  Hz, 1H), 6.32 (dd,  $J = 2.0$  Hz,  $J = 10$  Hz, 1H) ppm.

$^{13}\text{C NMR}$  (100 MHz, acetone- $d_6$ )  $\delta$  186.7, 138.6, 138.1, 137.4, 136.5, 135.6, 132.7, 130.93, 130.89, 130.7, 130.0, 129.6, 129.5, 129.2, 122.6, 108.2, 90.4 ppm.

**IR** (thin film) 2976, 2180, 1625, 1501, 1444, 1166, 864, 698  $\text{cm}^{-1}$ .

**HRMS** (CI+) Calcd for  $\text{C}_{21}\text{H}_{14}\text{O}$  [ $\text{M}^+$ ]: 282.1045, Found: 282.1058.

### Kinetic Study

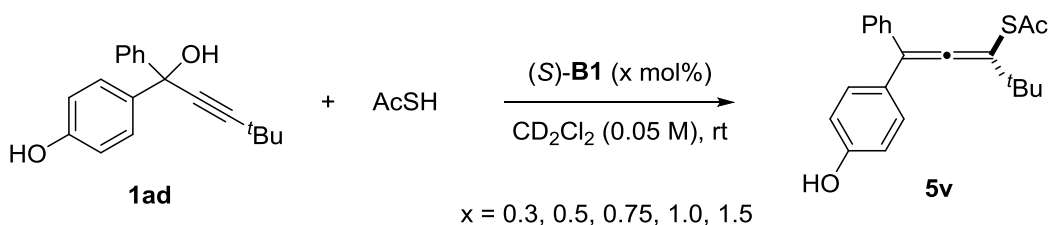

At room temperature, to an oven-dried 4-mL vial charged with a solution of propargylic alcohol **1ad** (14 mg, 0.05 mmol, 1.0 equiv.) in  $\text{CD}_2\text{Cl}_2$  (1.0 mL) was added a solution of the catalyst (*S*)-**B1** (1st run: 0.13 mg, 0.15  $\mu\text{mol}$ , 0.3 mol%; 2nd run: 0.21 mg, 0.25  $\mu\text{mol}$ , 0.5 mol%; 3rd run: 0.32 mg, 0.38  $\mu\text{mol}$ , 0.75 mol%; 4th run: 0.43 mg, 0.5  $\mu\text{mol}$ , 1.0 mol%; 5th run: 0.64 mg, 0.75  $\mu\text{mol}$ , 1.5 mol%) and thioacetic acid (7.2  $\mu\text{L}$ , 0.1 mmol, 2.0 equiv.) in  $\text{CD}_2\text{Cl}_2$  (50  $\mu\text{L}$ ). The homogeneous reaction mixture was transferred to an NMR tube. The progress of the five reactions was monitored by  $^1\text{H NMR}$  every 2 min.

As shown in Supplementary Figure 219, a linear relationship between the initial rates and catalyst loading was observed, indicating 1<sup>st</sup>-order kinetics in catalyst.

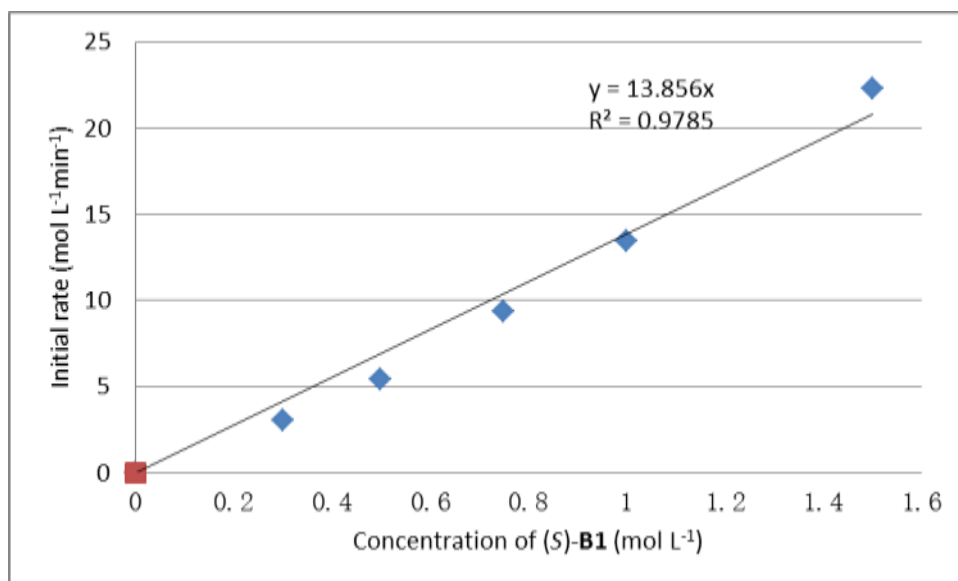

**Supplementary Figure 219. First-order kinetics in catalyst.**

## Supplementary Note 2. Product Derivatizations

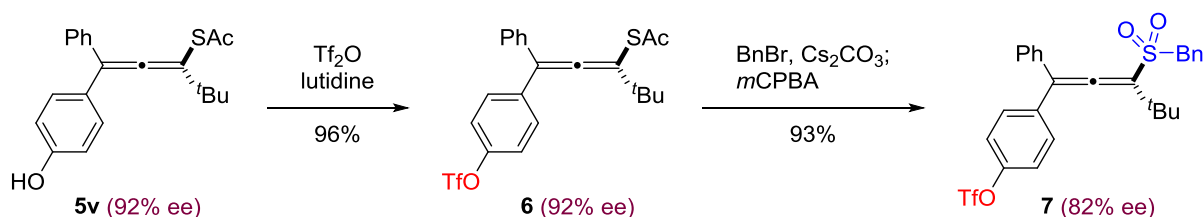

**(R)-S-(4,4-Dimethyl-1-phenyl-1-(4-(((trifluoromethyl)sulfonyl)oxy)phenyl)penta-1,2-dien-3-yl) ethanethioate (6).** At 0 °C, to a solution of 5v (338.2 mg, 1.0 mmol) in  $\text{CH}_2\text{Cl}_2$  (10 mL) were added 2,6-lutidine (419.3  $\mu\text{L}$ , 3.6 mmol, 3.6 equiv) and a solution of  $\text{Tf}_2\text{O}$  (370.1  $\mu\text{L}$ , 2.2 mmol, 2.2 equiv) in  $\text{CH}_2\text{Cl}_2$  (0.5 mL) sequentially. The reaction mixture was stirred at 0 °C for 10 min and then allowed to warm to room temperature. The mixture was concentrated, and the residue was purified by silica gel column chromatography (eluent: 3%  $\text{Et}_2\text{O}$  in hexanes, colorless oil, 451.7 mg, 96 yield, 92% ee).

$[\alpha]_{\text{D}}^{25}$ : +22.8 ( $c = 1.0$ ,  $\text{CHCl}_3$ ). HPLC analysis of the product: Daicel CHIRALCEL OD-H column; 1% *i*-PrOH in hexanes; 0.5 mL/min; retention times: 7.8 min (major), 8.6 min (minor).

$^1\text{H NMR}$  (400 MHz,  $\text{CDCl}_3$ )  $\delta$  7.53 (d,  $J = 8.8$  Hz, 2H), 7.42-7.31 (m, 5H), 7.27 (d,  $J = 8.8$  Hz, 2H), 2.37 (s, 3H), 1.19 (s, 9H) ppm.

$^{13}\text{C NMR}$  (100 MHz,  $\text{CDCl}_3$ )  $\delta$  207.4, 192.9, 148.7, 136.4, 135.1, 130.3, 128.64, 128.62, 127.9, 121.3, 118.8 (d,  $J_{\text{C-F}} = 319$  Hz), 109.0, 107.8, 37.4, 30.1, 28.8 ppm.

$^{19}\text{F NMR}$  (376 MHz,  $\text{CDCl}_3$ )  $\delta$  -72.9 ppm.

IR (thin film) 3521, 2967, 2882, 1708, 1426, 1214, 1142, 887  $\text{cm}^{-1}$ .

HRMS (CI+) Calcd for  $\text{C}_{22}\text{H}_{25}\text{F}_3\text{NO}_4\text{S}_2$   $[\text{M}+\text{NH}_4^+]$ : 488.1177, Found: 488.1164.

**(R)-4-(3-(Benzylsulfonyl)-4,4-dimethyl-1-phenylpenta-1,2-dien-1-yl)phenyltrifluoromethanesulfonate (7).** At room temperature, to a stirred solution of  $\text{Cs}_2\text{CO}_3$  (117.6 mg, 0.36 mmol, 1.2 equiv) in MeOH (6.0 mL) was added a solution of 6 (141.2 mg, 0.3

mmol, 1.0 equiv) and benzyl bromide (71.3  $\mu$ L, 0.6 mmol, 2.0 equiv) in MeOH (0.3 mL) dropwise. The mixture was stirred for 20 min. Next, Et<sub>2</sub>O (10 mL) was added, and the mixture was filtered through a short pad of silica gel, which was washed with Et<sub>2</sub>O (20 mL). The filtrate was concentrated to the crude product as a pale green oil, which was used for the next step without further purification.

At room temperature, the above oil was dissolved in CH<sub>2</sub>Cl<sub>2</sub> (6 mL) and then treated with *m*CPBA (151.9 mg, 0.66 mmol, 75 wt%, 2.2 equiv). The reaction mixture was stirred for 5 min before a saturated aqueous NaHCO<sub>3</sub> solution (10 mL) was added. The layers were separated and the aqueous layer was extracted with CH<sub>2</sub>Cl<sub>2</sub> (3 $\times$ 15 mL). The combined organic layers were washed with a saturated aqueous Na<sub>2</sub>SO<sub>3</sub> solution, a saturated aqueous NaHCO<sub>3</sub> solution, and brine, dried over Na<sub>2</sub>SO<sub>4</sub>, and concentrated. The residue was purified by silica gel flash column chromatography (5% Et<sub>2</sub>O in hexanes) to give pure sulfone **7** (153.6 mg, 93% yield, 82% ee).

$[\alpha]_D^{25}$ : -44.8 ( $c = 1.0$ , CHCl<sub>3</sub>). HPLC analysis of the product: Daicel CHIRALPAK AD-H column; 5% *i*-PrOH in hexanes; 1.0 mL/min; retention times: 15.9 min (major), 17.6 min (minor).

<sup>1</sup>H NMR (400 MHz, CD<sub>2</sub>Cl<sub>2</sub>)  $\delta$  7.50-7.43 (m, 5H), 7.38-7.31 (m, 4H), 7.27-7.17 (m, 3H), 7.13-7.10 (m, 2H), 4.26 (s, 2H), 1.33 (s, 9H) ppm.

<sup>13</sup>C NMR (100 MHz, CD<sub>2</sub>Cl<sub>2</sub>)  $\delta$  206.0, 149.9, 135.6, 134.2, 131.3, 130.9, 129.5, 129.1, 129.0, 128.8, 128.1, 124.1, 122.2, 119.2 (d,  $J_{C-F} = 319$  Hz), 117.1 (2C), 63.5, 37.5, 29.8 ppm.

<sup>19</sup>F NMR (376 MHz, CD<sub>2</sub>Cl<sub>2</sub>)  $\delta$  -73.2 ppm.

IR (thin film) 3444, 2970, 1934, 1498, 1425, 1313, 1214, 1141, 1016, 887, 698 cm<sup>-1</sup>.

HRMS (CI<sup>+</sup>) Calcd for C<sub>27</sub>H<sub>29</sub>F<sub>3</sub>NO<sub>5</sub>S<sub>2</sub> [M+NH<sub>4</sub><sup>+</sup>]: 568.1439, Found: 568.1470.

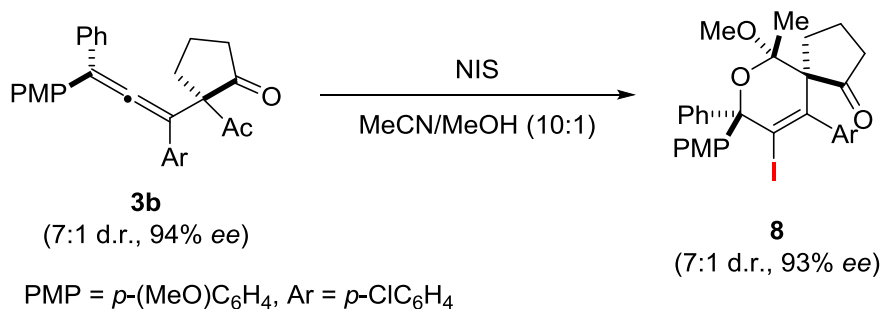

**(5*R*,6*S*,8*R*)-10-(4-Chlorophenyl)-9-iodo-6-methoxy-8-(4-methoxyphenyl)-6-methyl-8-phenyl-7-oxaspiro[4.5]dec-9-en-1-one (8).** Under N<sub>2</sub>, the tetrasubstituted allene **3b** (91.2 mg, 0.2 mmol, 1 equiv) was dissolved in anhydrous MeCN/MeOH (10:1, 4 mL) and then *N*-iodosuccinimide (54.0 mg, 0.24 mmol, 1.2 equiv) was added. After stirring at room temperature for 5 h, the reaction mixture was subjected to flash chromatography to give the desired product **8** as a white foam (eluent: 10% EtOAc in hexanes, 105.7 mg, 86% yield, 7:1 d.r., 93% ee).

[α]<sub>D</sub><sup>25</sup>: -26.1 (*c* = 1.0, CHCl<sub>3</sub>). HPLC analysis of the product: Daicel CHIRALPAK AD-H; 5% *i*-PrOH in hexanes; 1.0 mL/min; retention times: 5.9 min (major), 8.2 min (minor). Daicel CHIRALPAK IC; 5% *i*-PrOH in hexanes; 0.5 mL/min; retention times: 8.9 (major), 11.9 min (minor).

<sup>1</sup>H NMR (400 MHz, CD<sub>2</sub>Cl<sub>2</sub>) δ 7.90 (d, *J* = 7.6 Hz, 2H), 7.50 (d, *J* = 8.8 Hz, 2H), 7.45 (d, *J* = 8.4 Hz, 1H), 7.38-7.25 (m, 5H), 6.89 (d, *J* = 8.8 Hz, 2H), 6.70 (d, *J* = 8.8 Hz, 1H), 3.84 (s, 3H), 2.35-2.08 (m, 4H), 2.26 (s, 3H), 1.63-1.54 (m, 1H), 1.28 (s, 3H), 0.59-0.45 (m, 1H) ppm.

<sup>13</sup>C NMR (100 MHz, CD<sub>2</sub>Cl<sub>2</sub>) δ 217.6, 159.2, 145.9, 143.7, 136.2, 134.1, 133.4, 132.1, 131.6, 130.3, 129.3, 128.0, 127.1, 112.8, 112.3, 102.4, 83.8, 63.1, 55.8, 48.4, 40.8, 32.9, 19.6, 19.0 ppm.

IR (thin film) 2963, 1736, 1608, 1509, 1376, 1249, 1140, 998, 829, 700 cm<sup>-1</sup>.

HRMS (CI<sup>+</sup>) Calcd for C<sub>30</sub>H<sub>28</sub><sup>35</sup>ClIO<sub>4</sub> [M<sup>+</sup>]: 614.0721, Found: 614.0725.

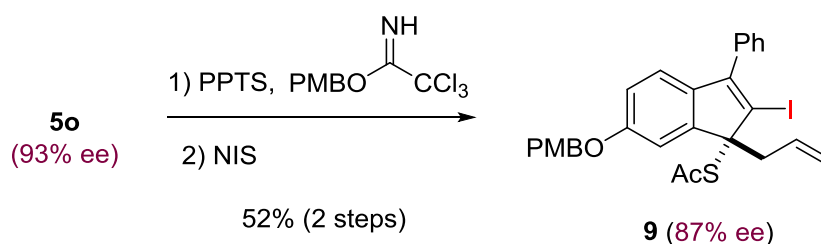

**(R)-S-(1-Allyl-2-iodo-6-((4-methoxybenzyl)oxy)-3-phenyl-1H-inden-1-yl) ethanethioate (9).** At room temperature, to a solution of **5o** (64.5 mg, 0.2 mmol) and *p*-methoxybenzyl trichloroacetimidate (PMBTCA)<sup>7</sup> in CCl<sub>4</sub> (2 mL) was added PPTS (25.1 mg, 0.1 mmol, 0.5 equiv). The mixture was stirred for 18 h, and then a saturated aqueous solution of NaHCO<sub>3</sub> (2 mL) was added. The layers were separated, and the aqueous layer was extracted with ethyl acetate (2 mL×3). The combined organic layers were concentrated. The residue was dissolved in DCM and then triturated with hexanes. The resulting mixture was filtered and the filtrate was concentrated. The residue was purified by silica gel column chromatography (eluent: 10% DCM and 1% Et<sub>2</sub>O in hexanes) to give a pale yellow oil (75% yield based on <sup>1</sup>H NMR).

To a solution of *N*-iodosuccinimide (40.5 mg, 0.18 mmol, 1.2 equiv) in nitromethane (1 mL) was added a solution of the above oil (0.15 mmol) in nitromethane (0.5 mL). The mixture was stirred at room temperature for 30 min, and then a saturated solution of sodium thiosulfate (1 mL) was added to quench the reaction. The mixture was extracted with ethyl acetate (2×20 mL). The combined organics layers were washed with brine, dried over MgSO<sub>4</sub>, filtered, and concentrated. The residue was purified by flash chromatography (eluent: 10% DCM and 1% Et<sub>2</sub>O in hexanes) to get the iodide **9** as a colorless oil (59.2 mg, 52% yield, 87% ee).

[α]<sub>D</sub><sup>25</sup>: -31.1 (*c* = 1.0, CHCl<sub>3</sub>). HPLC analysis of the product: Daicel CHIRALPAK AD-H column; 5% *i*-PrOH in hexanes; 1.0 mL/min; retention times: 8.0 min (minor), 12.6 min (major).



**<sup>1</sup>H NMR** (400 MHz, CDCl<sub>3</sub>) δ 7.48-7.37 (m, 8H), 7.06 (d, *J* = 8.4 Hz, 1H), 6.93 (d, *J* = 8.8 Hz, 2H), 6.84 (d, *J* = 8.8 Hz, 1H), 5.23-5.12 (m, 1H), 5.06 (s, 1H), 5.02 (s, 2H), 4.92 (d, *J* = 10 Hz, 1H), 3.82 (s, 3H), 3.12-3.06 (m, 1H), 2.74-2.67 (m, 1H), 2.21 (s, 3H) ppm.

**<sup>13</sup>C NMR** (100 MHz, CDCl<sub>3</sub>) δ 193.2, 159.5, 157.8, 150.0, 148.3, 137.1, 135.1, 130.1, 129.4, 128.8, 128.4, 128.3 (2C), 120.8, 119.3, 114.0, 113.7, 111.3, 103.7, 70.1, 66.3, 55.3, 40.0, 30.7 ppm.

**IR** (thin film) 3445, 1688, 1514, 1424, 1248, 1140, 1018, 824, 699 cm<sup>-1</sup>.

**HRMS** (CI<sup>+</sup>) Calcd for C<sub>28</sub>H<sub>25</sub>IO<sub>3</sub>S [M<sup>+</sup>]: 568.0569, Found: 568.0558.

### Supplementary Note 3. Determination of the Absolute Stereochemistry

(1) The absolute stereochemistry of product **3n** was determined by X-ray diffraction (shown below). The X-ray data of **3n** have been deposited at the Cambridge Crystallographic Data Center (CCDC 1498348). The stereochemistry of other products was assumed by analogy.

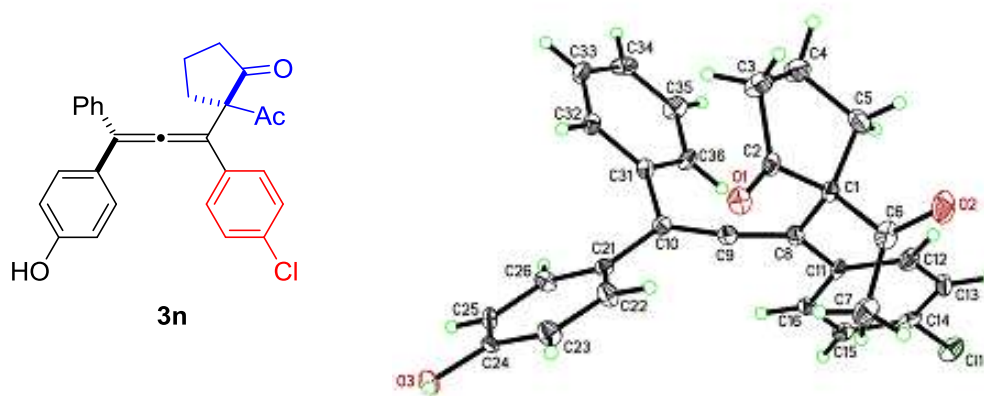

(2) The absolute stereochemistry of product **3b** was determined by comparing the optical rotation and HPLC spectra with that of **3n'** (the methyl-protected derivative of **3n**).

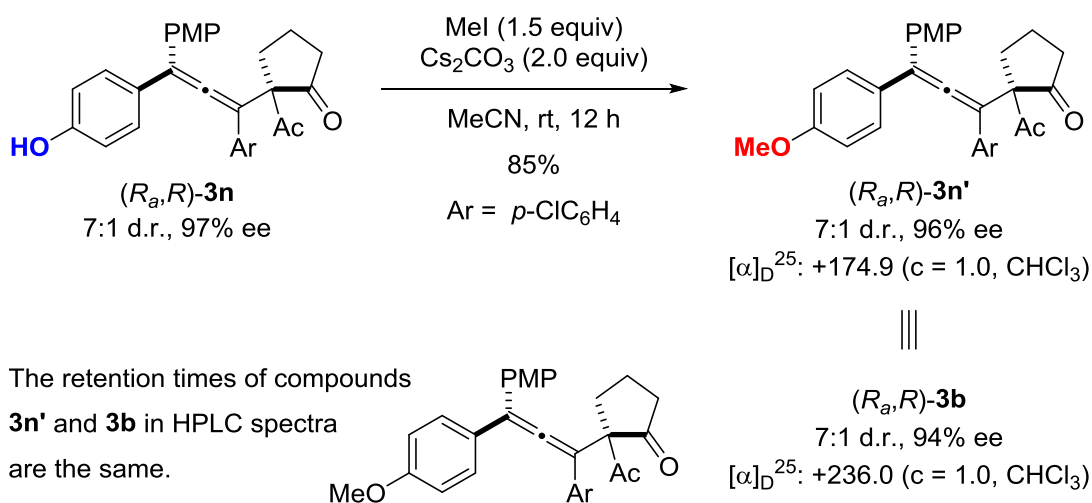



=0.503) being added.<sup>12</sup> The two H atoms, which were related to prototropic, were described by the 6-31G\*\* basis set.<sup>13</sup> The 6-31g\* basis set was used for all remaining atoms.<sup>14,15</sup> Frequency calculations were performed to ensure that a transition state has only one imaginary frequency and the local minimum has no imaginary frequency. Intrinsic reaction coordinates (IRC)<sup>16,17</sup> were run to ensure that transitions states connect the relevant minima. All the calculations were performed in the Gaussian 09 program.<sup>18</sup>

Cartesian Coordinates for **TS2**, the dimer, and the substrate:

### **TS2**

|                                |                                 |
|--------------------------------|---------------------------------|
| S 2.593479 -2.070699 1.888858  | C 3.646753 -2.497872 -1.091485  |
| S -4.259545 1.204648 -0.379173 | C 2.575356 -3.250187 -1.611592  |
| P -3.127975 -1.107498 0.958979 | C 4.967534 -2.952209 -1.273027  |
| O -1.480505 4.052451 -0.822059 | C 2.829329 -4.424625 -2.312313  |
| C -0.300446 1.973829 -0.538138 | H 1.560078 -2.906761 -1.445029  |
| C 0.909955 1.337247 -0.377785  | C 5.210577 -4.128549 -1.977736  |
| C 2.134534 2.057259 -0.341916  | H 5.789069 -2.374153 -0.861269  |
| C 2.073609 3.467074 -0.515740  | C 4.144005 -4.865674 -2.498656  |
| C 0.866279 4.114674 -0.681041  | H 2.000584 -4.999625 -2.715498  |
| C -0.342557 3.380109 -0.681789 | H 6.231685 -4.471391 -2.118898  |
| H -1.222387 1.401401 -0.544359 | H 4.335601 -5.784352 -3.046248  |
| H 0.924772 0.259383 -0.255531  | C 0.912002 -2.200349 1.719188   |
| H 2.991539 4.043691 -0.546892  | C 0.071542 -2.630026 2.898920   |
| H 0.818028 5.189280 -0.824347  | H 0.685415 -2.812536 3.780569   |
| C 3.381548 1.348362 -0.167519  | H -0.679663 -1.860978 3.112712  |
| C 4.642376 2.029028 0.218228   | H -0.477191 -3.541855 2.634601  |
| C 4.652894 3.030844 1.206997   | O 0.312698 -1.946097 0.607670   |
| C 5.863400 1.638847 -0.362142  | N -3.101790 0.151327 -0.057500  |
| C 5.851015 3.627893 1.595026   | O -3.641031 2.453866 -0.911447  |
| H 3.724295 3.314584 1.691108   | O -5.334501 1.333120 0.625692   |
| C 7.056203 2.247654 0.018413   | C -5.082762 0.492416 -1.912002  |
| H 5.861557 0.868228 -1.127082  | O -2.813845 -0.660057 2.503306  |
| C 7.054145 3.243786 0.998775   | O -4.622349 -1.735905 0.981974  |
| H 5.844668 4.389712 2.369460   | O -2.095079 -2.195504 0.653037  |
| H 7.988611 1.946083 -0.450546  | F -6.054183 1.317420 -2.316378  |
| H 7.985892 3.715044 1.298950   | F -4.187617 0.356726 -2.895452  |
| C 3.436027 -0.004556 -0.348746 | F -5.612487 -0.704724 -1.638032 |
| C 3.414341 -1.250568 -0.417756 | C -4.864851 -2.941072 1.725755  |

H -4.658491 -2.788208 2.790340  
H -5.921333 -3.176315 1.586099  
H -4.245211 -3.757544 1.344283  
C -3.473382 0.478029 3.089560  
H -3.211137 0.464680 4.149384  
H -3.115693 1.404094 2.630500  
H -4.556869 0.415987 2.965748  
H -2.262212 3.444266 -0.818069  
H -0.793463 -2.040695 0.637366

### Dimer

S 1.427189 -0.975729 0.926824  
S -4.151019 0.554918 -0.235269  
P 0.147815 1.606739 -0.105825  
N 0.155994 -0.019856 0.394482  
O 0.842003 -2.097356 1.666482  
O 2.496416 -0.119171 1.449527  
C 2.080374 -1.720044 -0.677208  
O 1.124027 2.441006 0.866520  
O 1.025964 1.574703 -1.455523  
O -1.262215 2.101171 -0.201140  
F 2.952249 -2.680633 -0.365504  
F 1.067148 -2.244591 -1.369642  
F 2.688135 -0.788924 -1.409841  
C 0.736064 2.699111 2.231087  
H 1.333897 3.549548 2.562240  
H -0.327843 2.945005 2.292621  
H 0.967230 1.824415 2.844130  
C 1.313066 2.807127 -2.147713  
H 1.788301 2.519990 -3.086563  
H 0.389886 3.357705 -2.351299  
H 1.996155 3.421280 -1.554839  
C -3.496564 -1.099881 -0.019684  
O -2.313185 -1.357502 0.126018  
C -4.546338 -2.190872 -0.065281  
H -5.531121 -1.832317 0.245281  
H -4.623629 -2.558803 -1.095813  
H -4.224579 -3.019449 0.570672  
H -0.750622 -0.515196 0.322998  
H -2.937045 1.190579 -0.225691

### Substrate

O -4.538811 -3.757969 -0.044859  
C -2.261254 -3.114073 0.130015  
C -1.348996 -2.115267 0.127202  
C -1.732703 -0.721982 -0.029844  
C -3.144839 -0.449905 -0.238920  
C -4.067045 -1.441542 -0.250775  
C -3.699778 -2.853196 -0.049351  
H -1.971341 -4.151521 0.269321  
H -0.294691 -2.333184 0.268727  
H -3.450939 0.574114 -0.423235  
H -5.118517 -1.237165 -0.430653  
C -0.771871 0.284576 -0.013558  
C -1.092774 1.739733 -0.011956  
C -2.043368 2.275739 0.874641  
C -0.403231 2.615049 -0.869497  
C -2.313351 3.644116 0.883903  
H -2.550112 1.619116 1.575027  
C -0.683067 3.979605 -0.866303  
H 0.345548 2.213476 -1.545753  
C -1.639944 4.499203 0.009731  
H -3.044734 4.042133 1.581921  
H -0.151833 4.639372 -1.546897  
H -1.852335 5.564738 0.016609  
C 0.608411 -0.024600 0.006911  
C 1.811607 -0.229220 0.018562  
C 3.212019 -0.470750 0.036078  
C 4.118157 0.598938 0.198438  
C 3.717795 -1.780153 -0.107633  
C 5.488971 0.360278 0.215326  
H 3.731113 1.606842 0.311354  
C 5.090464 -2.008089 -0.087925  
H 3.023692 -2.605144 -0.234393  
C 5.979340 -0.941170 0.072818  
H 6.177981 1.190795 0.341177  
H 5.469100 -3.020291 -0.198848  
H 7.050289 -1.123259 0.087336

## Supplementary References

---

1. Gabbutt, C. D., Heron, B. M., Kilner, C. & Kolla, S. B. The influence of a 1,1-diarylvinyli moiety on the photochromism of naphthopyrans. *Org. Biomol. Chem.* **8**, 4874–4883 (2010).
2. Wei, L.-M., Wei, L.-L., Pan, W.-B. & Wu, M.-J. Synthesis of tetraaryllallenes via palladium-catalyzed addition-Elimination reactions of 1,1,3-triaryl-2-propyn-1-ols with aryl iodides. *Synlett* 2219–2223 (2005).
3. Zhu, S., Niljianskul, N. & Buchwald, S. L. A direct approach to amines with remote stereocentres by enantioselective CuH-catalysed reductive relay hydroamination. *Nat. Chem.* **8**, 144–150 (2016).
4. van der Born, D., Sewing, C., Herscheid, J. D. M., Windhorst, A. D., Orru, R. V. A. & Vugts, D. J. A universal procedure for the [<sup>18</sup>F]trifluoromethylation of aryl iodides and aryl boronic acids with highly improved specific activity. *Angew. Chem. Int. Ed.* **53**, 11046–11050 (2014).
5. Buzas, A. & Gagosz, F. Gold(I) catalyzed isomerization of 5-en-2-yn-1-yl acetates: an efficient access to acetoxy bicyclo[3.1.0]hexenes and 2-cycloalken-1-ones. *J. Am. Chem. Soc.* **128**, 12614–12615 (2006).
6. Hong, X., Küçük, H. B., Maji, M. S., Yang, Y.-F., Rueping, M. & Houk, K. N. Mechanism and selectivity of *N*-triflylphosphoramidate catalyzed (3+2) cycloaddition between hydrazones and alkenes. *J. Am. Chem. Soc.* **136**, 13769–13780 (2014).
7. Kato, T., Sato, T., Kashiwagi, Y. & Hosokawa, S. Synthetic studies on Aculeximycin: synthesis of C<sub>24</sub>–C<sub>40</sub> segment by Kobayashi aldolization and epoxide rearrangements. *Org. Lett.* **17**, 2274–2277 (2015).
8. Becke, A. D. Density-functional thermochemistry. III. The role of exact exchange. *J. Chem. Phys.* **98**, 5648–5652 (1993).
9. Lee, C., Yang, W. & Parr, R. G. Development of the Colle-Salvetti correlation-energy formula into a functional of the electron density. *Phys. Rev. B.* **37**, 785–787 (1988).
10. Stephens, P. J., Devlin, F. J., Chabalowski, C. & Frisch, M. J. Ab initio calculation of vibrational absorption and circular dichroism spectra using density functional force fields. *J. Phys. Chem.* **98**, 11623–11627 (1994).
11. Wadt, W. R. & Hay, P. J. Ab initio effective core potentials for molecular calculations. Potentials for main group elements Na to Bi. *J. Chem. Phys.* **82**, 284–298 (1985).
12. Höllwarth, A., Böhme, M., Dapprich, S., Ehlers, A. W., Gobbi, A., Jonas, V., Köhler, K., Stegmann, R. & Frenking, G. A set of d-polarization functions for pseudo-potential basis sets of the main group elements Al–Bi and f-type polarization functions for Zn, Cd, Hg. *Chem. Phys. Lett.* **208**, 237–240 (1993).

- 
13. Hariharan, P. C. & Pople, J. A. The influence of polarization functions on molecular orbital hydrogenation energies. *Theor. Chim. Acta.* **28**, 213-222 (1973).
  14. Petersson, A., Bennett, A., Tensfeldt, T. G., Al-Laham, M. A., Shirley, W. A. & Mantzaris, J. A complete basis set model chemistry. I. The total energies of closed-shell atoms and hydrides of the first-row elements. *J. Chem. Phys.* **89**, 2193-2218 (1988).
  15. Petersson, G. A. & Al-Laham, M. A. A complete basis set model chemistry. II. Open-shell systems and the total energies of the first-row atoms. *J. Chem. Phys.* **94**, 6081-6090 (1991).
  16. Fukui, K. The path of chemical reactions-the IRC approach. *Acc. Chem. Res.* **14**, 363-368 (1981).
  17. Fukui, K. Formulation of the reaction coordinate. *J. Phys. Chem.* **74**, 4161-4163 (1970).
  18. Frisch, M. J., Trucks, G. W., Schlegel, H. B., Scuseria, G. E., Robb, M. A., Cheeseman, J. R., Scalmani, G., Barone, V., Mennucci, B., Petersson, G. A., Nakatsuji, H., Caricato, M., Li, X., Hratchian, H. P., Izmaylov, A. F., Bloino, J., Zheng, G., Sonnenberg, J. L., Hada, M., Ehara, M., Toyota, K., Fukuda, R., Hasegawa, J., Ishida, M., Nakajima, T., Honda, Y., Kitao, O., Nakai, H., Vreven, T., Montgomery, J. A., Jr., Peralta, J. E., Ogliaro, F., Bearpark, M., Heyd, J. J., Brothers, E., Kudin, K. N., Staroverov, V. N., Kobayashi, R., Normand, J., Raghavachari, K., Rendell, A., Burant, J. C., Iyengar, S. S., Tomasi, J., Cossi, M., Rega, N., Millam, M. J., Klene, M., Knox, J. E., Cross, J. B., Bakken, V., Adamo, C., Jaramillo, J., Gomperts, R., Stratmann, R. E., Yazyev, O., Austin, A. J., Cammi, R., Pomelli, C., Ochterski, J. W., Martin, R. L., Morokuma, K., Zakrzewski, V. G., Voth, G. A., Salvador, P., Dannenberg, J. J., Dapprich, S., Daniels, A. D., Farkas, Ö., Foresman, J. B., Ortiz, J. V., Cioslowski, J. & Fox, D. J. Gaussian 09, Revision D.01, Gaussian, Inc., Wallingford, CT, 2009.
